# Supplementary material for: Membrane Proteomic Profiling of Soybean Leaf and Root Tissues Uncovers Salt-Stress-Responsive Membrane Proteins
Source: MDPI journal article supplement (doi:10.3390/ijms232113270), 2022-10-31
Supplement: s1 [file s1]

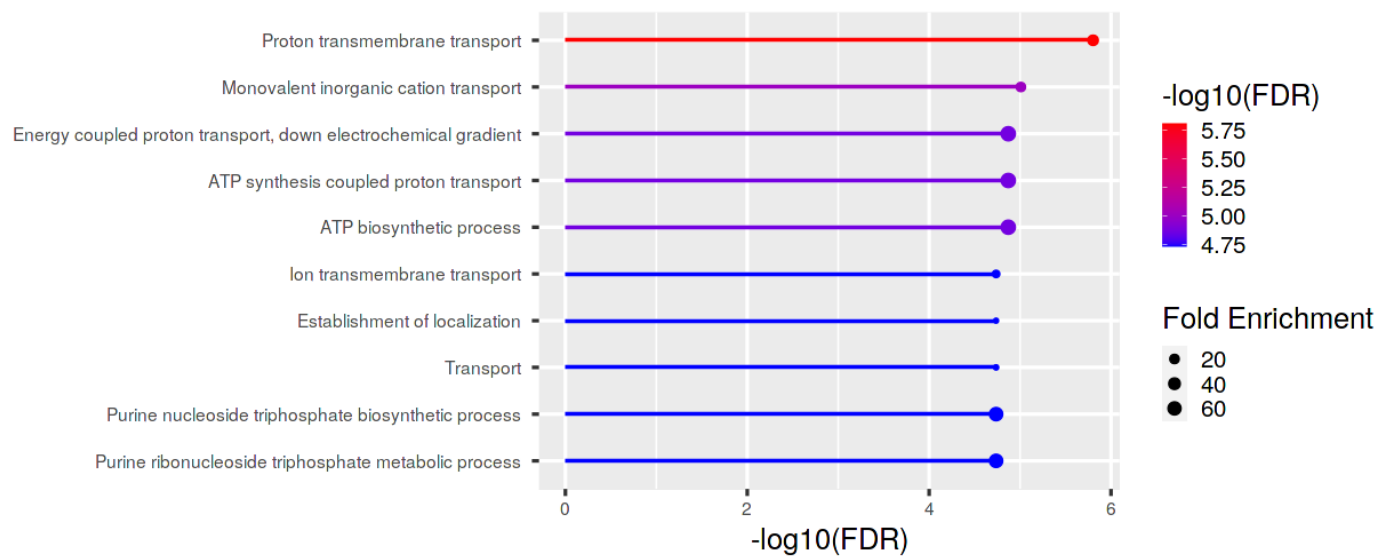

(a)

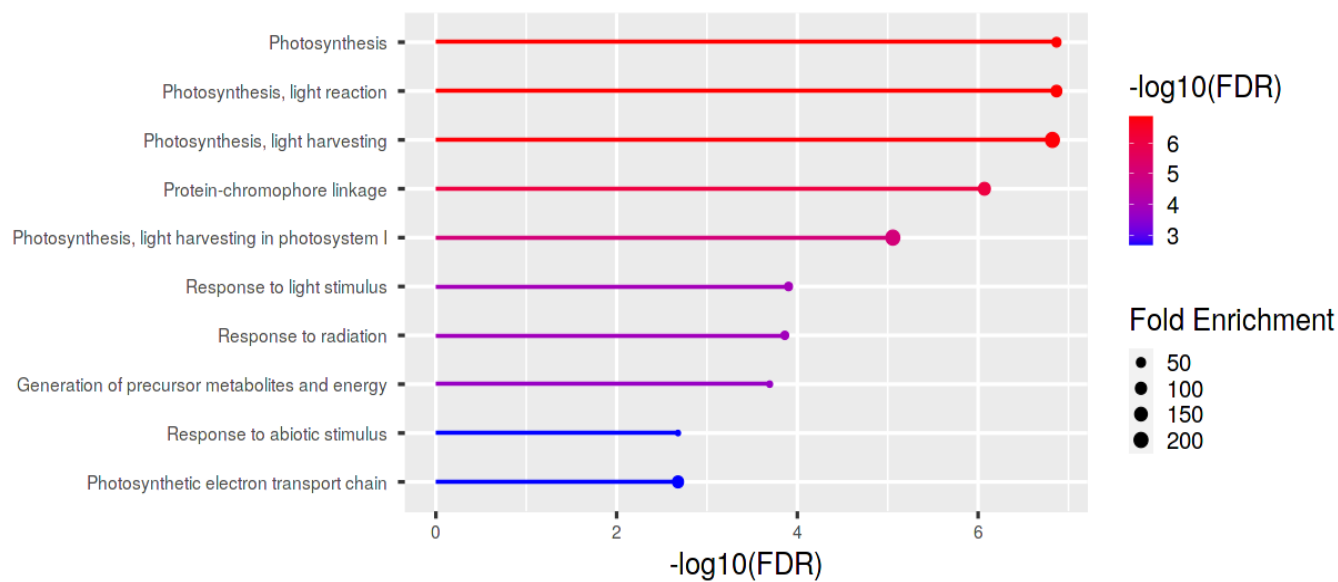

(b)

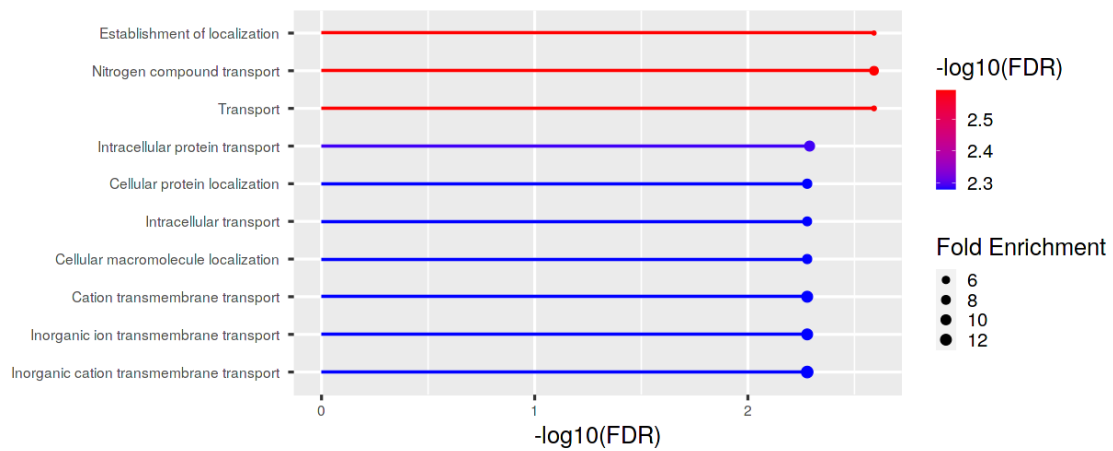

(c)

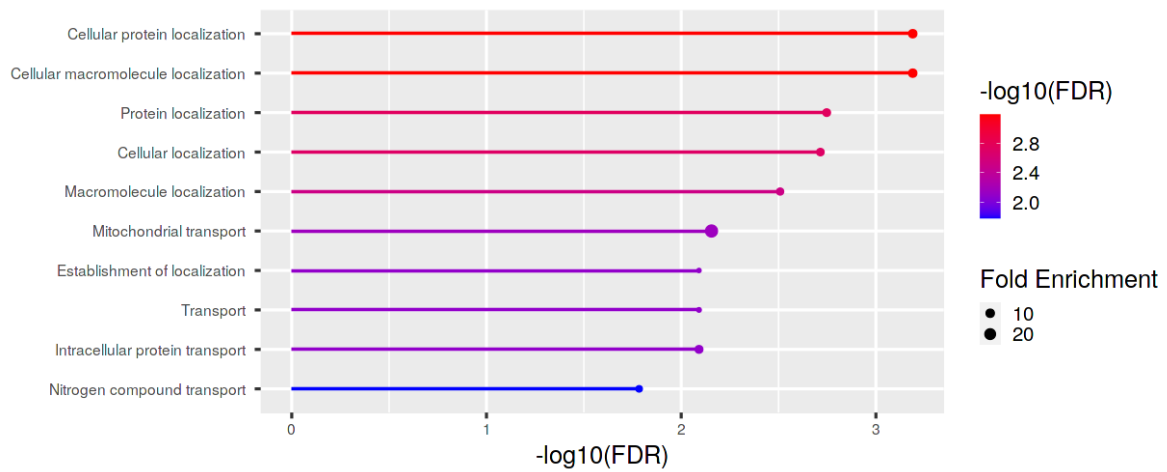

(d)

Figure S1: Molecular function GO enrichment of label free quantified membrane proteins in leaf and root tissues. (a) is showing the up-regulated membrane proteins functional enrichment analysis against salt stress in leaf. (b) is showing the down-regulated membrane proteins functional enrichment analysis against salt stress in leaf. (c) is showing the up-regulated membrane proteins functional enrichment analysis against salt stress in root. (d) is showing the down-regulated membrane proteins functional enrichment analysis against salt stress in root.

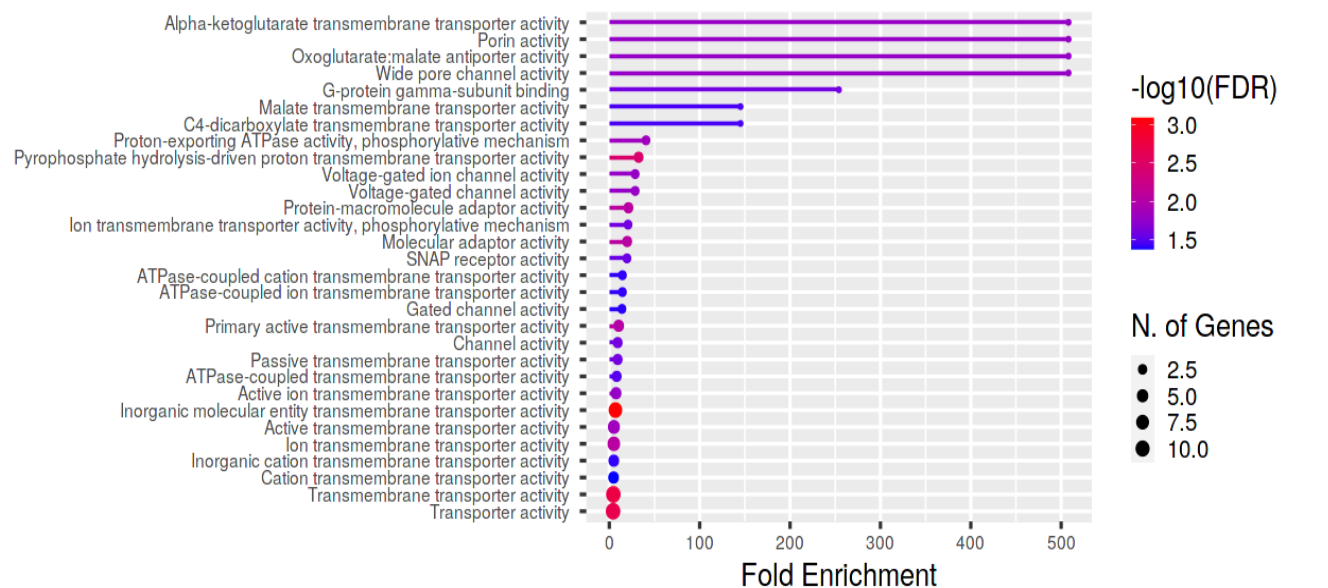

(a)

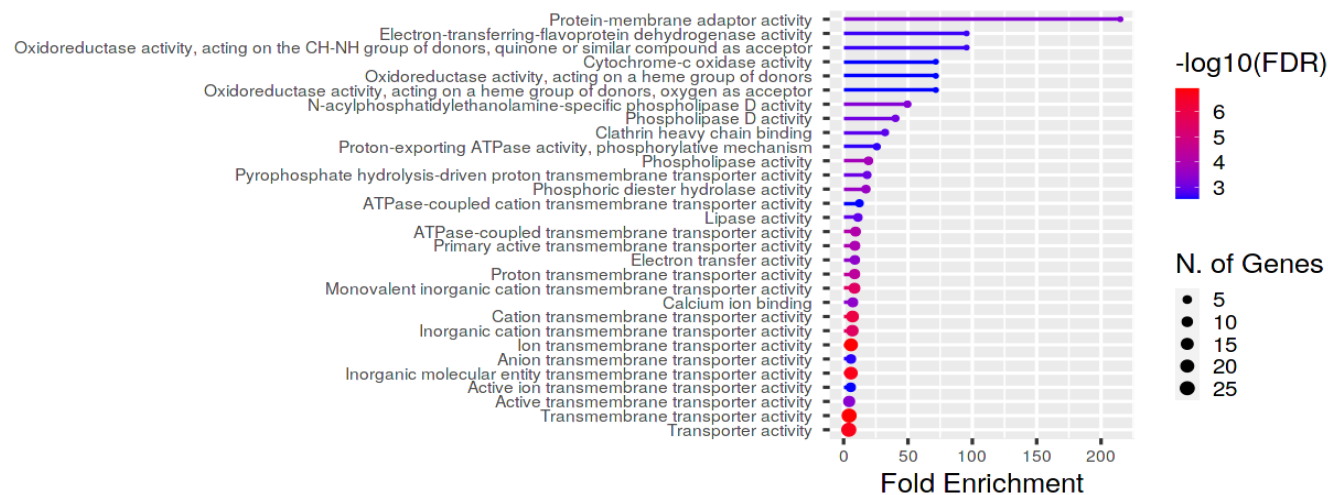

(b)

Figure S2: Molecular function Go enrichment of salt stress induced membrane proteins from leaf and root tissues. (a) is showing the molecular function associated terms of membrane proteins induced from leaf upon salt stress. (b) is showing the molecular function associated terms of membrane proteins induced from root upon salt stress.
