# Supplementary material for: Membrane Proteomic Profiling of Soybean Leaf and Root Tissues Uncovers Salt-Stress-Responsive Membrane Proteins
Source: Int J Mol Sci. 2022 Oct 31;23(21):13270. doi: 10.3390/ijms232113270 (PMC9655375; doi:10.3390/ijms232113270)
Supplement: Supplementary file 1 [file ijms-23-13270-s001.zip › Table S1.xlsx]

## Sheet: ReadMe
Column	Header	Description
AF	Present_Control	Count of how many Control samples had quant data	Computed in Python script
AG	Present_Sample	Count of how many salt-treatment samples had quant data	Computed in Python script
AH	Missing_Status	Missing value status (present is 2/3 or 3/3; missing is 1/3 or 0/3)	Computed in Python script
AI	Counter	Column of ones for row counting
AJ	Index	Copy of Accession column (keys used in annotation script)
AK	query_acc	Accession of identified protein	Ortholog mapping
AL	hit_acc	Accession of Adabidopsis ortholog	Ortholog mapping
AM	hit_desc	Description of Adabidopsis ortholog	Ortholog mapping
AN	blast_scores	Summary of BLAST alignment	Ortholog mapping
AO	match_status	Summary of relative match status	Ortholog mapping
AP	Primary Protein Name	Main protein name	UniProt annotations
AQ	Alternative Protein Names	Any other protein names	UniProt annotations
AR	Identifier	Swiss-Prot identifier	UniProt annotations
AS	Accession	Swiss-Prot accession	UniProt annotations
AT	Other Accessions	Any other accessions	UniProt annotations
AU	UniProt Gene Name	UniProt gene symbols	UniProt annotations
AV	Other Gene Synonyms	Any other gene symbols	UniProt annotations
AW	Species Name	Species name	UniProt annotations
AX	Taxonomy Number	Taxonomy number	UniProt annotations
AY	UniProt Link	Link to UniProt knowledgebase	UniProt annotations
AZ	Key Words	UniProt keyword lists (a controlled vocabulary added by curation)	UniProt annotations
BA	KW: Biological process	Keywords separated into categories	UniProt annotations
BB	KW: Cellular component	Keywords separated into categories	UniProt annotations
BC	KW: Coding sequence diversity	Keywords separated into categories	UniProt annotations
BD	KW: Developmental stage	Keywords separated into categories	UniProt annotations
BE	KW: Disease	Keywords separated into categories	UniProt annotations
BF	KW: Domain	Keywords separated into categories	UniProt annotations
BG	KW: Ligand	Keywords separated into categories	UniProt annotations
BH	KW: Molecular function	Keywords separated into categories	UniProt annotations
BI	KW: PTM	Keywords separated into categories	UniProt annotations
BJ	KW: Technical term	Keywords separated into categories	UniProt annotations
BK	GO: Biological Process	GO terms	UniProt annotations
BL	GO: Cellular Component	GO terms	UniProt annotations
BM	GO: Molecular Function	GO terms	UniProt annotations
BN	CC Pathway	Manual curation pathway notes	UniProt annotations
BO	Reactome Pathway	Reactome pathway information	UniProt annotations
BP	Trim	Blank column

## Sheet: Identified Proteins
Protein FDR Confidence: Combined	Master	Accession	Description	Exp. q-value: Combined	Sum PEP Score	Coverage [%]	# Peptides	# PSMs	# Unique Peptides	# AAs	MW [kDa]	calc. pI	Score Sequest HT: Sequest HT	# Peptides (by Search Engine): Sequest HT	# Razor Peptides	Abundance Ratio: (Sample) / (Control)	Abundance Ratio Adj. P-Value: (Sample) / (Control)	Abundance Ratio Variability [%]: (Sample) / (Control)	Abundances (Grouped): Control	Abundances (Grouped): Sample	Abundances (Grouped) CV [%]: Control	Abundances (Grouped) CV [%]: Sample	Control Leaf 1	Control Leaf 2	Control Leaf 3	50 mm Leaf Replicate1	50 mm Leaf Replicate 2	50 mm Leaf Replicate 3	# Protein Groups	Modifications	Present_Control	Present_Sample	Missing_Status	Counter	Index	query_acc	hit_acc	hit_desc	blast_scores	match_status	Primary Protein Name	Alternative Protein Names	Identifier	Accession	Other Accessions	UniProt Gene Name	Other Gene Synonyms	Species Name	Taxonomy Number
High	Master Protein	GLYMA_11G061300	K02716 - photosystem II oxygen-evolving enhancer protein 1 (psbO) (1 of 4)	0	862.229	62	41	925	8	329	34.8	5.67	3280.68	41	33	0.838	0.921221	45.71	111.5	88.5	4.61	27.32	High	High	High	High	High	High	1		3	3	Present Both	1	GLYMA_11G061300	GLYMA_11G061300	sp|P23321|PSBO1_ARATH	Oxygen-evolving enhancer protein 1-1, chloroplastic GN=PSBO1	ident:260/329 pos:294/329 query:329 hit:332 align:332 bit:540.4	OK	Oxygen-evolving enhancer protein 1-1, chloroplastic (OEE1)	33 kDa subunit of oxygen evolving system of photosystem II; 33 kDa thylakoid membrane protein; Manganese-stabilizing protein 1 (MSP-1); OEC 33 kDa subunit	PSBO1_ARATH	P23321	O81917; Q41998; Q8L7F1; Q8LAT1; Q93Y28; Q93ZP8; Q94JV7	PSBO1	PSBO	Arabidopsis thaliana (Mouse-ear cress)	3702
High	Master Protein	GLYMA_01G180800	K02716 - photosystem II oxygen-evolving enhancer protein 1 (psbO) (1 of 4)	0	854.8	62	40	993	8	329	34.8	6.77	3546.57	40	0	0.699	0.655809	33.88	110.9	89.1	17.05	28.38	High	High	High	High	High	High	1		3	3	Present Both	1	GLYMA_01G180800	GLYMA_01G180800	sp|Q9S841|PSBO2_ARATH	Oxygen-evolving enhancer protein 1-2, chloroplastic GN=PSBO2	ident:259/329 pos:295/329 query:329 hit:331 align:331 bit:535.4	OK	Oxygen-evolving enhancer protein 1-2, chloroplastic (OEE1)	33 kDa subunit of oxygen evolving system of photosystem II; 33 kDa thylakoid membrane protein; Manganese-stabilizing protein 2 (MSP-2); OEC 33 kDa subunit	PSBO2_ARATH	Q9S841	na	PSBO2	na	Arabidopsis thaliana (Mouse-ear cress)	3702
High	Master Protein	GLYMA_05G184800	PF15704 - Mitochondrial ATP synthase subunit (Mt_ATP_synt) (1 of 3)	0	843.554	83	42	363	6	241	27.5	6.44	1506.14	42	43	1.119	0.930202	61.11	94.7	105.3	28.93	35.3	High	High	High	High	High	High	1		3	3	Present Both	1	GLYMA_05G184800	GLYMA_05G184800	sp|Q9SJ12|ATP7_ARATH	Probable ATP synthase 24 kDa subunit, mitochondrial GN=ATL77	ident:169/241 pos:205/241 query:241 hit:240 align:241 bit:342.4	OK	Probable ATP synthase 24 kDa subunit, mitochondrial	na	ATP7_ARATH	Q9SJ12	Q8LBN3	OrderedLocusNames=At2g21870	na	Arabidopsis thaliana (Mouse-ear cress)	3702
High	Master Protein	GLYMA_20G177700	K02138 - F-type H+-transporting ATPase subunit d (ATPeF0D, ATP5H, ATP7) (1 of 2)	0	806.808	96	45	441	21	168	19.9	5.29	1695.23	45	26	0.981	0.999087	62.11	95.7	104.3	9.54	15.39	High	High	High	High	High	High	1		3	3	Present Both	1	GLYMA_20G177700	GLYMA_20G177700	sp|Q9FT52|ATP5H_ARATH	ATP synthase subunit d, mitochondrial GN=ATL31	ident:143/168 pos:157/168 query:168 hit:168 align:168 bit:301.6	OK	ATP synthase subunit d, mitochondrial (ATPase subunit d)	na	ATP5H_ARATH	Q9FT52	Q8RW89; Q8W039	OrderedLocusNames=At3g52300	na	Arabidopsis thaliana (Mouse-ear cress)	3702
High	Master Protein	GLYMA_02G061100	K02716 - photosystem II oxygen-evolving enhancer protein 1 (psbO) (1 of 4)	0	797.708	62	41	934	10	326	34.6	6.32	3351.21	41	3	1.158	0.897464	50.73	92.6	107.4	5.72	29.67	High	High	High	High	High	High	1		3	3	Present Both	1	GLYMA_02G061100	GLYMA_02G061100	sp|Q9S841|PSBO2_ARATH	Oxygen-evolving enhancer protein 1-2, chloroplastic GN=PSBO2	ident:258/326 pos:292/326 query:326 hit:331 align:332 bit:533.9	OK	Oxygen-evolving enhancer protein 1-2, chloroplastic (OEE1)	33 kDa subunit of oxygen evolving system of photosystem II; 33 kDa thylakoid membrane protein; Manganese-stabilizing protein 2 (MSP-2); OEC 33 kDa subunit	PSBO2_ARATH	Q9S841	na	PSBO2	na	Arabidopsis thaliana (Mouse-ear cress)	3702
High	Master Protein	GLYMA_10G213400	K02138 - F-type H+-transporting ATPase subunit d (ATPeF0D, ATP5H, ATP7) (1 of 2)	0	787.473	96	44	442	20	168	19.9	5.2	1687.84	44	0	0.989	0.999087	46.24	100.4	99.6	21.56	7.54	High	High	High	High	High	High	1		3	3	Present Both	1	GLYMA_10G213400	GLYMA_10G213400	sp|Q9FT52|ATP5H_ARATH	ATP synthase subunit d, mitochondrial GN=ATL31	ident:139/168 pos:154/168 query:168 hit:168 align:168 bit:294.7	OK	ATP synthase subunit d, mitochondrial (ATPase subunit d)	na	ATP5H_ARATH	Q9FT52	Q8RW89; Q8W039	OrderedLocusNames=At3g52300	na	Arabidopsis thaliana (Mouse-ear cress)	3702
High	Master Protein	GLYMA_08G142800	PF15704 - Mitochondrial ATP synthase subunit (Mt_ATP_synt) (1 of 3)	0	785.397	82	40	331	4	241	27.5	6.84	1366.25	40	0	1.402	0.620527	52.46	82.4	117.6	23.04	37.16	High	High	High	High	High	High	1		3	3	Present Both	1	GLYMA_08G142800	GLYMA_08G142800	sp|Q9SJ12|ATP7_ARATH	Probable ATP synthase 24 kDa subunit, mitochondrial GN=ATL77	ident:164/241 pos:205/241 query:241 hit:240 align:241 bit:337.0	OK	Probable ATP synthase 24 kDa subunit, mitochondrial	na	ATP7_ARATH	Q9SJ12	Q8LBN3	OrderedLocusNames=At2g21870	na	Arabidopsis thaliana (Mouse-ear cress)	3702
High	Master Protein	GLYMA_05G046300	PTHR23359//PTHR23359:SF99 - NUCLEOTIDE KINASE // SUBFAMILY NOT NAMED (1 of 5)	0	785.076	76	38	409	10	242	26.6	7.81	1719.29	38	27	1.2	0.852529	64.02	91.2	108.8	41.99	30.36	High	High	High	High	High	High	1		3	3	Present Both	1	GLYMA_05G046300	GLYMA_05G046300	sp|O82514|KAD4_ARATH	Adenylate kinase 4 GN=ADK1	ident:195/242 pos:220/242 query:242 hit:246 align:241 bit:417.9	OK	Adenylate kinase 4 (AK 4)	ATP-AMP transphosphorylase 4; ATP:AMP phosphotransferase; Adenylate monophosphate kinase 4 (AMK4)	KAD4_ARATH	O82514	Q9FMW2	ADK1	na	Arabidopsis thaliana (Mouse-ear cress)	3702
High	Master Protein	GLYMA_10G267200	K02133 - F-type H+-transporting ATPase subunit beta (ATPeF1B, ATP5B, ATP2) (1 of 3)	0	718.497	70	37	301	4	559	59.8	6.15	1464.51	37	37	0.821	0.897464	56.22	104.7	95.3	44.35	39.21	High	High	High	High	High	High	1		3	3	Present Both	1	GLYMA_10G267200	GLYMA_10G267200	sp|Q9C5A9|ATPBO_ARATH	ATP synthase subunit beta-3, mitochondrial GN=ATG8C	ident:453/559 pos:491/559 query:559 hit:559 align:540 bit:906.7	OK	ATP synthase subunit beta-3, mitochondrial	na	ATPBO_ARATH	Q9C5A9	na	OrderedLocusNames=At5g08680	na	Arabidopsis thaliana (Mouse-ear cress)	3702
High	Master Protein	GLYMA_20G123600	K02133 - F-type H+-transporting ATPase subunit beta (ATPeF1B, ATP5B, ATP2) (1 of 3)	0	706.227	70	36	301	3	559	59.8	6.15	1444.6	36	0	1.119	0.941929	108.41	155.5	44.5	85.82	140.25	High	High	High	High	Peak Found	High	1		3	3	Present Both	1	GLYMA_20G123600	GLYMA_20G123600	sp|Q9C5A9|ATPBO_ARATH	ATP synthase subunit beta-3, mitochondrial GN=ATG8C	ident:451/559 pos:488/559 query:559 hit:559 align:524 bit:913.3	OK	ATP synthase subunit beta-3, mitochondrial	na	ATPBO_ARATH	Q9C5A9	na	OrderedLocusNames=At5g08680	na	Arabidopsis thaliana (Mouse-ear cress)	3702
High	Master Protein	GLYMA_07G014500	PTHR31284:SF7 - ACID PHOSPHATASE-RELATED (1 of 8)	0	639.967	70	38	621	38	254	29	8.63	2541.64	38	0	1.543	0.466825	95.08	72.1	127.9	46.55	65.87	High	High	High	High	High	High	1	Phospho [R217]	3	3	Present Both	1	GLYMA_07G014500	GLYMA_07G014500	sp|O49195|VSP1_ARATH	Vegetative storage protein 1 GN=VSP1	ident:99/254 pos:130/254 query:254 hit:270 align:216 bit:179.9	Poor_match	Vegetative storage protein 1	na	VSP1_ARATH	O49195	O23827; O82121; Q39259; Q42000; Q93VJ6	VSP1	na	Arabidopsis thaliana (Mouse-ear cress)	3702
High	Master Protein	GLYMA_17G128300	PTHR23359//PTHR23359:SF99 - NUCLEOTIDE KINASE // SUBFAMILY NOT NAMED (1 of 5)	0	631.2	76	36	322	7	242	26.6	7.81	1315.95	36	2	1.176	0.878841	49.77	104.6	95.4	45.27	37.29	High	High	High	High	High	High	1		3	3	Present Both	1	GLYMA_17G128300	GLYMA_17G128300	sp|O82514|KAD4_ARATH	Adenylate kinase 4 GN=ADK1	ident:193/242 pos:216/242 query:242 hit:246 align:241 bit:412.5	OK	Adenylate kinase 4 (AK 4)	ATP-AMP transphosphorylase 4; ATP:AMP phosphotransferase; Adenylate monophosphate kinase 4 (AMK4)	KAD4_ARATH	O82514	Q9FMW2	ADK1	na	Arabidopsis thaliana (Mouse-ear cress)	3702
High	Master Protein	GLYMA_15G026400	K15718 - linoleate 9S-lipoxygenase (LOX1_5) (1 of 21)	0	553.721	49	54	284	9	856	96.3	6.81	1052.77	54	42	0.839	0.921221	39.61	111.8	88.2	26.59	20.25	High	High	High	High	High	High	1	Acetyl [N-Term]	3	3	Present Both	1	GLYMA_15G026400	GLYMA_15G026400	sp|Q06327|LOX1_ARATH	Linoleate 9S-lipoxygenase 1 GN=LOX1	ident:494/856 pos:651/856 query:856 hit:859 align:879 bit:1000.4	OK	Linoleate 9S-lipoxygenase 1	Lipoxygenase 1 (AtLOX1)	LOX1_ARATH	Q06327	Q9FZ30	LOX1	na	Arabidopsis thaliana (Mouse-ear cress)	3702
High	Master Protein	GLYMA_15G026500	K15718 - linoleate 9S-lipoxygenase (LOX1_5) (1 of 21)	0	545.622	42	47	263	5	853	96.6	6.07	1007.92	47	12	0.743	0.740874	30.37	122.5	77.5	31.47	18	High	High	High	High	High	High	1		3	3	Present Both	1	GLYMA_15G026500	GLYMA_15G026500	sp|Q06327|LOX1_ARATH	Linoleate 9S-lipoxygenase 1 GN=LOX1	ident:498/853 pos:647/853 query:853 hit:859 align:861 bit:1012.7	OK	Linoleate 9S-lipoxygenase 1	Lipoxygenase 1 (AtLOX1)	LOX1_ARATH	Q06327	Q9FZ30	LOX1	na	Arabidopsis thaliana (Mouse-ear cress)	3702
High	Master Protein	GLYMA_18G255700	PTHR11743//PTHR11743:SF31 - VOLTAGE-DEPENDENT ANION-SELECTIVE CHANNEL // SUBFAMILY NOT NAMED (1 of 6)	0	536.152	79	32	565	5	276	29.8	8.65	2280.6	32	0	1.37	0.655258	64.15	82.6	117.4	65.02	39	High	High	High	High	High	High	1		3	3	Present Both	1	GLYMA_18G255700	GLYMA_18G255700	sp|Q9SRH5|VDAC1_ARATH	Mitochondrial outer membrane protein porin 1 GN=VDAC1	ident:202/276 pos:243/276 query:276 hit:276 align:276 bit:425.2	OK	Mitochondrial outer membrane protein porin 1	Voltage-dependent anion-selective channel protein 1 (AtVDAC1; VDAC-1)	VDAC1_ARATH	Q9SRH5	na	VDAC1	na	Arabidopsis thaliana (Mouse-ear cress)	3702
High	Master Protein	GLYMA_09G240600	PTHR11743//PTHR11743:SF31 - VOLTAGE-DEPENDENT ANION-SELECTIVE CHANNEL // SUBFAMILY NOT NAMED (1 of 6)	0	533.941	79	32	566	5	276	29.7	8.65	2277.4	32	26	1.467	0.559557	61.29	73	127	37.76	20.13	High	High	High	High	High	High	1		3	3	Present Both	1	GLYMA_09G240600	GLYMA_09G240600	sp|Q9SRH5|VDAC1_ARATH	Mitochondrial outer membrane protein porin 1 GN=VDAC1	ident:202/276 pos:242/276 query:276 hit:276 align:276 bit:424.9	OK	Mitochondrial outer membrane protein porin 1	Voltage-dependent anion-selective channel protein 1 (AtVDAC1; VDAC-1)	VDAC1_ARATH	Q9SRH5	na	VDAC1	na	Arabidopsis thaliana (Mouse-ear cress)	3702
High	Master Protein	GLYMA_13G064900	PTHR11743//PTHR11743:SF31 - VOLTAGE-DEPENDENT ANION-SELECTIVE CHANNEL // SUBFAMILY NOT NAMED (1 of 6)	0	531.239	81	32	411	11	276	29.7	9.06	1488.78	32	11	1.546	0.465155	65.49	74.2	125.8	30.59	25.82	High	High	High	High	High	High	1		3	3	Present Both	1	GLYMA_13G064900	GLYMA_13G064900	sp|Q9SRH5|VDAC1_ARATH	Mitochondrial outer membrane protein porin 1 GN=VDAC1	ident:205/276 pos:246/276 query:276 hit:276 align:276 bit:428.7	OK	Mitochondrial outer membrane protein porin 1	Voltage-dependent anion-selective channel protein 1 (AtVDAC1; VDAC-1)	VDAC1_ARATH	Q9SRH5	na	VDAC1	na	Arabidopsis thaliana (Mouse-ear cress)	3702
High	Master Protein	GLYMA_07G112000	K08901 - photosystem II oxygen-evolving enhancer protein 3 (psbQ) (1 of 4)	0	494.106	60	31	209	11	234	24.9	9.8	841.87	31	18	0.789	0.848414	63.82	112.5	87.5	98.82	85.4	High	High	High	High	High	High	1		3	3	Present Both	1	GLYMA_07G112000	GLYMA_07G112000	sp|Q41932|PSBQ2_ARATH	Oxygen-evolving enhancer protein 3-2, chloroplastic GN=PSBQ2	ident:167/234 pos:194/234 query:234 hit:230 align:235 bit:324.7	OK	Oxygen-evolving enhancer protein 3-2, chloroplastic (OEE3)	16 kDa subunit of oxygen evolving system of photosystem II; OEC 16 kDa subunit	PSBQ2_ARATH	Q41932	Q9M0X7	PSBQ2	PSBQB	Arabidopsis thaliana (Mouse-ear cress)	3702
High	Master Protein	GLYMA_19G020100	PTHR11743//PTHR11743:SF31 - VOLTAGE-DEPENDENT ANION-SELECTIVE CHANNEL // SUBFAMILY NOT NAMED (1 of 6)	0	472.631	81	31	417	10	276	29.7	9.07	1546.29	31	0	1.664	0.332912	57.32	76.4	123.6	36.84	37.09	High	High	High	High	High	High	1	Phospho [D72]	3	3	Present Both	1	GLYMA_19G020100	GLYMA_19G020100	sp|Q9SRH5|VDAC1_ARATH	Mitochondrial outer membrane protein porin 1 GN=VDAC1	ident:204/276 pos:244/276 query:276 hit:276 align:276 bit:425.2	OK	Mitochondrial outer membrane protein porin 1	Voltage-dependent anion-selective channel protein 1 (AtVDAC1; VDAC-1)	VDAC1_ARATH	Q9SRH5	na	VDAC1	na	Arabidopsis thaliana (Mouse-ear cress)	3702
High	Master Protein	GLYMA_13G347700	K15718 - linoleate 9S-lipoxygenase (LOX1_5) (1 of 21)	0	471.123	45	43	224	7	853	96.4	6.1	832.36	43	0	1.567	0.567172	69.3	37.3	162.7	57	83.74	High	High	High	High	High	High	1		3	3	Present Both	1	GLYMA_13G347700	GLYMA_13G347700	sp|Q06327|LOX1_ARATH	Linoleate 9S-lipoxygenase 1 GN=LOX1	ident:501/853 pos:650/853 query:853 hit:859 align:861 bit:1016.5	OK	Linoleate 9S-lipoxygenase 1	Lipoxygenase 1 (AtLOX1)	LOX1_ARATH	Q06327	Q9FZ30	LOX1	na	Arabidopsis thaliana (Mouse-ear cress)	3702
High	Master Protein	GLYMA_12G232000	K02111 - F-type H+-transporting ATPase subunit alpha (ATPF1A, atpA) (1 of 2)	0	470.151	61	33	199	33	510	55.7	5.21	758.79	33	0	0.698	0.655258	23.91	97.9	102.1	6.41	26.84	High	High	High	High	High	High	1		3	3	Present Both	1	GLYMA_12G232000	GLYMA_12G232000	sp|P56757|ATPA_ARATH	ATP synthase subunit alpha, chloroplastic GN=atpA	ident:480/510 pos:492/510 query:510 hit:507 align:507 bit:966.5	OK	ATP synthase subunit alpha, chloroplastic	ATP synthase F1 sector subunit alpha; F-ATPase subunit alpha	ATPA_ARATH	P56757	na	atpA	na	Arabidopsis thaliana (Mouse-ear cress)	3702
High	Master Protein	GLYMA_10G249000	K02692 - photosystem I subunit II (psaD) (1 of 2)	0	461.321	70	28	273	4	210	23	9.61	1112.63	28	30	0.719	0.715924	32.77	116.9	83.1	11.92	20.9	High	High	High	High	High	High	1		3	3	Present Both	1	GLYMA_10G249000	GLYMA_10G249000	sp|Q9SA56|PSAD2_ARATH	Photosystem I reaction center subunit II-2, chloroplastic GN=PSAD2	ident:156/210 pos:174/210 query:210 hit:204 align:210 bit:306.2	OK	Photosystem I reaction center subunit II-2, chloroplastic	Photosystem I 20 kDa subunit 2 (PSI-D2)	PSAD2_ARATH	Q9SA56	Q9SUI3	PSAD2	na	Arabidopsis thaliana (Mouse-ear cress)	3702
High	Master Protein	GLYMA_11G135900	PTHR14194:SF38 - PROTEIN PLASTID TRANSCRIPTIONALLY ACTIVE 16 (1 of 2)	0	452.454	66	36	174	13	516	55.5	8.65	697.69	36	23	0.646	0.54847	23.04	128.7	71.3	38.14	25.58	High	High	High	High	High	High	1		3	3	Present Both	1	GLYMA_11G135900	GLYMA_11G135900	sp|Q9STF2|PTA16_ARATH	Protein PLASTID TRANSCRIPTIONALLY ACTIVE 16, chloroplastic GN=PTAC16	ident:333/516 pos:414/516 query:516 hit:510 align:522 bit:591.3	OK	Protein PLASTID TRANSCRIPTIONALLY ACTIVE 16, chloroplastic (pTAC16)	na	PTA16_ARATH	Q9STF2	Q9ASP7	PTAC16	na	Arabidopsis thaliana (Mouse-ear cress)	3702
High	Master Protein	GLYMA_12G202500	K08902 - photosystem II Psb27 protein (psb27) (1 of 2)	0	443.937	54	16	172	3	173	19	9.94	831.89	16	0	1.196	0.855893	77.61	104.8	95.2	46.13	30.28	High	High	High	High	High	High	1		3	3	Present Both	1	GLYMA_12G202500	GLYMA_12G202500	sp|Q9LR64|PB27A_ARATH	Photosystem II repair protein PSB27-H1, chloroplastic GN=PSB27-1	ident:94/173 pos:112/173 query:173 hit:174 align:139 bit:191.0	OK	Photosystem II repair protein PSB27-H1, chloroplastic (Psb27-H1)	Thylakoid lumenal protein PSB27-H1	PB27A_ARATH	Q9LR64	Q9FPJ9	PSB27-1	na	Arabidopsis thaliana (Mouse-ear cress)	3702
High	Master Protein	GLYMA_13G347800	K15718 - linoleate 9S-lipoxygenase (LOX1_5) (1 of 21)	0	442.69	44	47	228	5	822	92.7	7.01	809.89	47	3	0.965	0.999087	50.97	117.8	82.2	31.09	23.03	High	High	High	High	High	High	1	Acetyl [N-Term]	3	3	Present Both	1	GLYMA_13G347800	GLYMA_13G347800	sp|Q06327|LOX1_ARATH	Linoleate 9S-lipoxygenase 1 GN=LOX1	ident:460/822 pos:611/822 query:822 hit:859 align:840 bit:928.3	OK	Linoleate 9S-lipoxygenase 1	Lipoxygenase 1 (AtLOX1)	LOX1_ARATH	Q06327	Q9FZ30	LOX1	na	Arabidopsis thaliana (Mouse-ear cress)	3702
High	Master Protein	GLYMA_12G059600	PTHR14194:SF38 - PROTEIN PLASTID TRANSCRIPTIONALLY ACTIVE 16 (1 of 2)	0	428.706	59	32	166	9	513	55	8.03	638.6	32	0	0.632	0.509673	22.26	139.4	60.6	35.17	45.22	High	High	High	High	High	High	1		3	3	Present Both	1	GLYMA_12G059600	GLYMA_12G059600	sp|Q9STF2|PTA16_ARATH	Protein PLASTID TRANSCRIPTIONALLY ACTIVE 16, chloroplastic GN=PTAC16	ident:322/513 pos:401/513 query:513 hit:510 align:522 bit:567.0	OK	Protein PLASTID TRANSCRIPTIONALLY ACTIVE 16, chloroplastic (pTAC16)	na	PTA16_ARATH	Q9STF2	Q9ASP7	PTAC16	na	Arabidopsis thaliana (Mouse-ear cress)	3702
High	Master Protein	GLYMA_12G078100	PTHR11353:SF11 - CHAPERONIN 60 SUBUNIT ALPHA 1, CHLOROPLASTIC (1 of 2)	0	422.932	54	37	151	36	584	61.7	5.4	568.27	37	1	0.913	0.974214	51.34	115.2	84.8	9.3	21.98	High	High	High	High	High	High	1		3	3	Present Both	1	GLYMA_12G078100	GLYMA_12G078100	sp|P21238|CPNA1_ARATH	Chaperonin 60 subunit alpha 1, chloroplastic GN=CPN60A1	ident:486/584 pos:524/584 query:584 hit:586 align:556 bit:950.7	OK	Chaperonin 60 subunit alpha 1, chloroplastic (CPN-60 alpha 1)	Protein SCHLEPPERLESS; RuBisCO large subunit-binding protein subunit alpha 1	CPNA1_ARATH	P21238	Q42554; Q56WB8; Q8L5U4	CPN60A1	Cpn60-A(2); SLP	Arabidopsis thaliana (Mouse-ear cress)	3702
High	Master Protein	GLYMA_03G114600	K08901 - photosystem II oxygen-evolving enhancer protein 3 (psbQ) (1 of 4)	0	419.636	59	28	185	8	232	24.8	9.85	733.2	28	0	0.823	0.897464	50.81	107.9	92.1	72.99	81.77	High	High	High	High	High	High	1		3	3	Present Both	1	GLYMA_03G114600	GLYMA_03G114600	sp|Q41932|PSBQ2_ARATH	Oxygen-evolving enhancer protein 3-2, chloroplastic GN=PSBQ2	ident:163/232 pos:190/232 query:232 hit:230 align:236 bit:312.0	OK	Oxygen-evolving enhancer protein 3-2, chloroplastic (OEE3)	16 kDa subunit of oxygen evolving system of photosystem II; OEC 16 kDa subunit	PSBQ2_ARATH	Q41932	Q9M0X7	PSBQ2	PSBQB	Arabidopsis thaliana (Mouse-ear cress)	3702
High	Master Protein	GLYMA_13G241300	PTHR10639:SF7 - CLATHRIN LIGHT CHAIN (1 of 4)	0	412.322	54	36	196	6	313	34.6	5.12	666.01	36	31	0.953	0.99396	52.27	92.8	107.2	3.64	12.82	High	High	High	High	High	High	1		3	3	Present Both	1	GLYMA_13G241300	GLYMA_13G241300	sp|Q9SKU1|CLC1_ARATH	Clathrin light chain 1 GN=CKX6	ident:167/313 pos:199/313 query:313 hit:338 align:302 bit:248.1	OK	Clathrin light chain 1	na	CLC1_ARATH	Q9SKU1	Q8LG44	OrderedLocusNames=At2g20760	na	Arabidopsis thaliana (Mouse-ear cress)	3702
High	Master Protein	GLYMA_17G208000	K00417 - ubiquinol-cytochrome c reductase subunit 7 (QCR7, UQCRB) (1 of 2)	0	407.018	78	20	212	5	122	14.5	9.58	797.03	20	20	1.173	0.883388	72.62	87.4	112.6	7.63	18.88	High	High	High	High	High	High	1		3	3	Present Both	1	GLYMA_17G208000	GLYMA_17G208000	sp|F4JWS8|QCR72_ARATH	Cytochrome b-c1 complex subunit 7-2 GN=QCR7-2	ident:97/122 pos:110/122 query:122 hit:122 align:122 bit:206.1	OK	Cytochrome b-c1 complex subunit 7-2	Complex III subunit VII	QCR72_ARATH	F4JWS8	na	QCR7-2	na	Arabidopsis thaliana (Mouse-ear cress)	3702
High	Master Protein	GLYMA_04G131800	K17080 - prohibitin 1 (PHB1) (1 of 3)	0	404.735	92	27	142	4	279	30.4	8.35	601.26	27	28	1.135	0.921221	60.48	97.5	102.5	13.82	11.89	High	High	High	High	High	High	1		3	3	Present Both	1	GLYMA_04G131800	GLYMA_04G131800	sp|O04331|PHB3_ARATH	Prohibitin-3, mitochondrial GN=PHB3	ident:226/279 pos:257/279 query:279 hit:277 align:275 bit:474.9	OK	Prohibitin-3, mitochondrial (Atphb3)	Protein ENHANCED ETHYLENE RESPONSE 3	PHB3_ARATH	O04331	na	PHB3	EER3	Arabidopsis thaliana (Mouse-ear cress)	3702
High	Master Protein	GLYMA_15G072100	PTHR10639:SF7 - CLATHRIN LIGHT CHAIN (1 of 4)	0	402.104	52	35	187	5	322	35.3	5.19	633.38	35	0	0.88	0.957425	33.35	104.2	95.8	10.46	39.18	High	High	High	High	High	High	1		3	3	Present Both	1	GLYMA_15G072100	GLYMA_15G072100	sp|Q9SKU1|CLC1_ARATH	Clathrin light chain 1 GN=CKX6	ident:168/322 pos:193/322 query:322 hit:338 align:299 bit:244.6	OK	Clathrin light chain 1	na	CLC1_ARATH	Q9SKU1	Q8LG44	OrderedLocusNames=At2g20760	na	Arabidopsis thaliana (Mouse-ear cress)	3702
High	Master Protein	GLYMA_12G049400	K03969 - phage shock protein A (pspA) (1 of 3)	0	400.138	61	28	149	27	323	35.5	9.33	659.66	28	1	1.283	0.740874	53.12	96.7	103.3	22.38	15.47	High	High	High	High	High	High	1		3	3	Present Both	1	GLYMA_12G049400	GLYMA_12G049400	sp|O80796|VIPP1_ARATH	Membrane-associated protein VIPP1, chloroplastic GN=VIPP1	ident:225/323 pos:276/323 query:323 hit:330 align:332 bit:427.2	OK	Membrane-associated protein VIPP1, chloroplastic	Protein VESICLE-INDUCING PROTEIN IN PLASTIDS 1	VIPP1_ARATH	O80796	na	VIPP1	na	Arabidopsis thaliana (Mouse-ear cress)	3702
High	Master Protein	GLYMA_03G105300	K02134 - F-type H+-transporting ATPase subunit delta (ATPeF1D, ATP5D, ATP16) (1 of 2)	0	393.822	81	16	171	11	197	20.8	7.58	875.12	16	0	1.32	0.71897	53.01	83.4	116.6	8.76	31.6	High	High	High	High	High	High	1		3	3	Present Both	1	GLYMA_03G105300	GLYMA_03G105300	sp|Q96252|ATP4_ARATH	ATP synthase subunit delta', mitochondrial GN=ATL75	ident:136/197 pos:162/197 query:197 hit:203 align:182 bit:290.4	OK	ATP synthase subunit delta', mitochondrial	F-ATPase delta' subunit	ATP4_ARATH	Q96252	na	OrderedLocusNames=At5g47030	na	Arabidopsis thaliana (Mouse-ear cress)	3702
High	Master Protein	GLYMA_07G117000	K02134 - F-type H+-transporting ATPase subunit delta (ATPeF1D, ATP5D, ATP16) (1 of 2)	0	392.022	81	17	182	12	197	20.8	7.58	924.24	17	7	1.294	0.729322	55.94	80.6	119.4	8.59	18.93	High	High	High	High	High	High	1		3	3	Present Both	1	GLYMA_07G117000	GLYMA_07G117000	sp|Q96252|ATP4_ARATH	ATP synthase subunit delta', mitochondrial GN=ATL75	ident:139/197 pos:161/197 query:197 hit:203 align:182 bit:292.7	OK	ATP synthase subunit delta', mitochondrial	F-ATPase delta' subunit	ATP4_ARATH	Q96252	na	OrderedLocusNames=At5g47030	na	Arabidopsis thaliana (Mouse-ear cress)	3702
High	Master Protein	GLYMA_06G317500	K17080 - prohibitin 1 (PHB1) (1 of 3)	0	384.448	91	26	136	3	279	30.3	8.37	570.08	26	0	1.414	0.611312	37.2	82	118	14.03	57.73	High	High	High	High	High	High	1		3	3	Present Both	1	GLYMA_06G317500	GLYMA_06G317500	sp|O04331|PHB3_ARATH	Prohibitin-3, mitochondrial GN=PHB3	ident:228/279 pos:259/279 query:279 hit:277 align:275 bit:479.9	OK	Prohibitin-3, mitochondrial (Atphb3)	Protein ENHANCED ETHYLENE RESPONSE 3	PHB3_ARATH	O04331	na	PHB3	EER3	Arabidopsis thaliana (Mouse-ear cress)	3702
High	Master Protein	GLYMA_13G299200	K08902 - photosystem II Psb27 protein (psb27) (1 of 2)	0	362.975	56	17	160	4	169	18.6	9.94	776.53	17	16	0.737	0.737319	32.4	112.4	87.6	14.14	12.89	High	High	High	High	High	High	1		3	3	Present Both	1	GLYMA_13G299200	GLYMA_13G299200	sp|Q9LR64|PB27A_ARATH	Photosystem II repair protein PSB27-H1, chloroplastic GN=PSB27-1	ident:96/169 pos:111/169 query:169 hit:174 align:138 bit:193.7	OK	Photosystem II repair protein PSB27-H1, chloroplastic (Psb27-H1)	Thylakoid lumenal protein PSB27-H1	PB27A_ARATH	Q9LR64	Q9FPJ9	PSB27-1	na	Arabidopsis thaliana (Mouse-ear cress)	3702
High	Master Protein	GLYMA_14G126300	K00417 - ubiquinol-cytochrome c reductase subunit 7 (QCR7, UQCRB) (1 of 2)	0	355.787	77	18	186	3	122	14.6	9.61	653.02	18	0	0.932	0.974736	40.76	120	80	5.7	56.83	High	High	High	High	High	High	1		3	3	Present Both	1	GLYMA_14G126300	GLYMA_14G126300	sp|F4JWS8|QCR72_ARATH	Cytochrome b-c1 complex subunit 7-2 GN=QCR7-2	ident:98/122 pos:110/122 query:122 hit:122 align:122 bit:205.7	OK	Cytochrome b-c1 complex subunit 7-2	Complex III subunit VII	QCR72_ARATH	F4JWS8	na	QCR7-2	na	Arabidopsis thaliana (Mouse-ear cress)	3702
High	Master Protein	GLYMA_08G200100	PTHR31284:SF7 - ACID PHOSPHATASE-RELATED (1 of 8)	0	339.065	59	20	166	20	254	29.3	7.21	678.41	20	0	1.381	0.643001	55.47	77.5	122.5	21.53	37.35	High	High	High	High	High	High	1		3	3	Present Both	1	GLYMA_08G200100	GLYMA_08G200100	sp|O49195|VSP1_ARATH	Vegetative storage protein 1 GN=VSP1	ident:96/254 pos:135/254 query:254 hit:270 align:215 bit:179.5	Poor_match	Vegetative storage protein 1	na	VSP1_ARATH	O49195	O23827; O82121; Q39259; Q42000; Q93VJ6	VSP1	na	Arabidopsis thaliana (Mouse-ear cress)	3702
High	Master Protein	GLYMA_06G165200	K03696 - ATP-dependent Clp protease ATP-binding subunit ClpC (clpC) (1 of 6)	0	338.433	46	44	160	5	922	102.4	6.46	557.04	44	36	0.827	0.906801	34.34	111.7	88.3	14.82	20.45	High	High	High	High	High	High	1		3	3	Present Both	1	GLYMA_06G165200	GLYMA_06G165200	sp|Q9FI56|CLPC1_ARATH	Chaperone protein ClpC1, chloroplastic GN=CLPC1	ident:822/922 pos:866/922 query:922 hit:929 align:925 bit:1598.2	OK	Chaperone protein ClpC1, chloroplastic	ATP-dependent Clp protease ATP-binding subunit ClpC homolog 1; Casein lytic proteinase C1; Protein DE-REGULATED CAO ACCUMULATION 1; Protein IRON-RESCUED MUTANT 1	CLPC1_ARATH	Q9FI56	O48931	CLPC1	na	Arabidopsis thaliana (Mouse-ear cress)	3702
High	Master Protein	GLYMA_13G139900	K02152 - V-type H+-transporting ATPase subunit G (ATPeV1G, ATP6G) (1 of 4)	0	327.268	94	21	149	4	110	12.2	6.58	632.91	21	18	1.255	0.768727	59.08	93.6	106.4	26.22	7.77	High	High	High	High	High	High	1		3	3	Present Both	1	GLYMA_13G139900	GLYMA_13G139900	sp|O82628|VATG1_ARATH	V-type proton ATPase subunit G1 GN=VHA-G1	ident:82/110 pos:95/110 query:110 hit:110 align:110 bit:139.8	OK	V-type proton ATPase subunit G1 (V-ATPase subunit G1)	Vacuolar H(+)-ATPase subunit G isoform 1; Vacuolar proton pump subunit G1	VATG1_ARATH	O82628	na	VHA-G1	AVMA10; VAG1; VATG1; VMA10	Arabidopsis thaliana (Mouse-ear cress)	3702
High	Master Protein	GLYMA_16G189100	PTHR11655:SF14 - 54S RIBOSOMAL PROTEIN L6, MITOCHONDRIAL (1 of 2)	0	321.317	72	27	144	9	226	24.9	9.99	496.25	27	19	0.991	0.999087	75.93	100.9	99.1	63.14	67.34	High	High	High	High	High	High	1		3	3	Present Both	1	GLYMA_16G189100	GLYMA_16G189100	sp|O23049|RK6_ARATH	50S ribosomal protein L6, chloroplastic GN=RPL6	ident:179/226 pos:202/226 query:226 hit:223 align:226 bit:368.2	OK	50S ribosomal protein L6, chloroplastic	Protein EMBRYO DEFECTIVE 2394	RK6_ARATH	O23049	na	RPL6	EMB2394	Arabidopsis thaliana (Mouse-ear cress)	3702
High	Master Protein	GLYMA_08G296700	PTHR11743//PTHR11743:SF31 - VOLTAGE-DEPENDENT ANION-SELECTIVE CHANNEL // SUBFAMILY NOT NAMED (1 of 6)	0	320.475	50	20	189	2	276	29.8	7.68	720.51	20	17	1.112	0.940311	66.72	82.3	117.7	48.29	30.42	High	High	High	High	High	High	1		3	3	Present Both	1	GLYMA_08G296700	GLYMA_08G296700	sp|Q9SRH5|VDAC1_ARATH	Mitochondrial outer membrane protein porin 1 GN=VDAC1	ident:187/276 pos:231/276 query:276 hit:276 align:276 bit:391.0	OK	Mitochondrial outer membrane protein porin 1	Voltage-dependent anion-selective channel protein 1 (AtVDAC1; VDAC-1)	VDAC1_ARATH	Q9SRH5	na	VDAC1	na	Arabidopsis thaliana (Mouse-ear cress)	3702
High	Master Protein	GLYMA_04G247900	PF00085//PF13098//PF13848 - Thioredoxin (Thioredoxin) // Thioredoxin-like domain (Thioredoxin_2) // Thioredoxin-like domain (Thioredoxin_6) (1 of 2)	0	319.242	65	34	85	11	525	58.7	5.17	288.2	34	18	1.373	0.655206	132.37	73.5	126.5	155.04	149.41	Peak Found	High	High	High	Peak Found	High	1		3	3	Present Both	1	GLYMA_04G247900	GLYMA_04G247900	sp|Q9SRG3|PDI12_ARATH	Protein disulfide isomerase-like 1-2 GN=PDIL1-2	ident:338/525 pos:400/525 query:525 hit:508 align:483 bit:704.1	OK	Protein disulfide isomerase-like 1-2 (AtPDIL1-2)	Protein disulfide-isomerase 2 (PDI 2); Protein disulfide-isomerase 6 (AtPDI6)	PDI12_ARATH	Q9SRG3	Q0WV97	PDIL1-2	PDI6	Arabidopsis thaliana (Mouse-ear cress)	3702
High	Master Protein	GLYMA_13G145200	K11294 - nucleolin (NCL, NSR1) (1 of 11)	0	318.531	67	25	96	19	279	29.9	6.61	412.78	25	6	1.174	0.879928	52.39	69.9	130.1	40.79	49.42	High	High	High	High	High	High	1		3	3	Present Both	1	GLYMA_13G145200	GLYMA_13G145200	sp|Q9ZUU4|CP29B_ARATH	RNA-binding protein CP29B, chloroplastic GN=CP29B	ident:156/279 pos:180/279 query:279 hit:289 align:241 bit:272.7	OK	RNA-binding protein CP29B, chloroplastic	Ribonucleoprotein At2g37220	CP29B_ARATH	Q9ZUU4	Q7GA50; Q8L941	CP29B	na	Arabidopsis thaliana (Mouse-ear cress)	3702
High	Master Protein	GLYMA_18G125500	PTHR11743//PTHR11743:SF31 - VOLTAGE-DEPENDENT ANION-SELECTIVE CHANNEL // SUBFAMILY NOT NAMED (1 of 6)	0	318.071	50	20	188	2	276	29.8	7.68	717.87	20	0	1.617	0.388268	29.14	75.2	124.8	27.18	17.51	High	High	High	High	High	High	1		3	3	Present Both	1	GLYMA_18G125500	GLYMA_18G125500	sp|Q9SRH5|VDAC1_ARATH	Mitochondrial outer membrane protein porin 1 GN=VDAC1	ident:187/276 pos:230/276 query:276 hit:276 align:276 bit:389.8	OK	Mitochondrial outer membrane protein porin 1	Voltage-dependent anion-selective channel protein 1 (AtVDAC1; VDAC-1)	VDAC1_ARATH	Q9SRH5	na	VDAC1	na	Arabidopsis thaliana (Mouse-ear cress)	3702
High	Master Protein	GLYMA_07G002300	K02145 - V-type H+-transporting ATPase subunit A (ATPeV1A, ATP6A) (1 of 2)	0	314.895	28	14	99	2	623	68.7	5.5	452.3	14	12	0.745	0.740874	23.73	122	78	17.96	6.65	High	High	High	Not Found	Not Found	High	1		3	1	Only Control	1	GLYMA_07G002300	GLYMA_07G002300	sp|O23654|VATA_ARATH	V-type proton ATPase catalytic subunit A GN=VHA-A	ident:581/623 pos:599/623 query:623 hit:623 align:623 bit:1209.1	OK	V-type proton ATPase catalytic subunit A (V-ATPase subunit A)	V-ATPase 69 kDa subunit; Vacuolar H(+)-ATPase subunit A; Vacuolar proton pump subunit alpha	VATA_ARATH	O23654	na	VHA-A	na	Arabidopsis thaliana (Mouse-ear cress)	3702
High	Master Protein	GLYMA_08G232000	K17080 - prohibitin 1 (PHB1) (1 of 3)	0	311.062	83	24	118	6	280	30.5	8.35	461.97	24	0	0.694	0.655258	19.5	122.1	77.9	21.62	16.58	High	High	High	High	High	High	1		3	3	Present Both	1	GLYMA_08G232000	GLYMA_08G232000	sp|O04331|PHB3_ARATH	Prohibitin-3, mitochondrial GN=PHB3	ident:230/280 pos:263/280 query:280 hit:277 align:276 bit:486.5	OK	Prohibitin-3, mitochondrial (Atphb3)	Protein ENHANCED ETHYLENE RESPONSE 3	PHB3_ARATH	O04331	na	PHB3	EER3	Arabidopsis thaliana (Mouse-ear cress)	3702
High	Master Protein	GLYMA_10G052700	K02152 - V-type H+-transporting ATPase subunit G (ATPeV1G, ATP6G) (1 of 4)	0	307.47	87	17	155	5	110	12.2	7.42	680.23	17	0	0.921	0.974214	35.67	106.2	93.8	43.54	11.29	High	High	High	High	High	High	1		3	3	Present Both	1	GLYMA_10G052700	GLYMA_10G052700	sp|O82628|VATG1_ARATH	V-type proton ATPase subunit G1 GN=VHA-G1	ident:83/110 pos:96/110 query:110 hit:110 align:110 bit:144.8	OK	V-type proton ATPase subunit G1 (V-ATPase subunit G1)	Vacuolar H(+)-ATPase subunit G isoform 1; Vacuolar proton pump subunit G1	VATG1_ARATH	O82628	na	VHA-G1	AVMA10; VAG1; VATG1; VMA10	Arabidopsis thaliana (Mouse-ear cress)	3702
High	Master Protein	GLYMA_05G201100	K03696 - ATP-dependent Clp protease ATP-binding subunit ClpC (clpC) (1 of 6)	0	302.947	40	37	128	1	919	102.3	6.77	468.14	37	0	1.888	0.465057	15.07	69.3	130.7	14.3		High	Peak Found	Not Found	Not Found	Not Found	High	1		2	1	Only Control	1	GLYMA_05G201100	GLYMA_05G201100	sp|Q9FI56|CLPC1_ARATH	Chaperone protein ClpC1, chloroplastic GN=CLPC1	ident:817/919 pos:857/919 query:919 hit:929 align:928 bit:1562.7	OK	Chaperone protein ClpC1, chloroplastic	ATP-dependent Clp protease ATP-binding subunit ClpC homolog 1; Casein lytic proteinase C1; Protein DE-REGULATED CAO ACCUMULATION 1; Protein IRON-RESCUED MUTANT 1	CLPC1_ARATH	Q9FI56	O48931	CLPC1	na	Arabidopsis thaliana (Mouse-ear cress)	3702
High	Master Protein	GLYMA_15G250500	PTHR11353:SF8 - CHAPERONIN 60 SUBUNIT BETA 1, CHLOROPLASTIC-RELATED (1 of 3)	0	295.288	34	22	109	1	591	62.8	5.87	464.29	22	0	0.724	0.725051	5.91	119.6	80.4	31.89	33.73	High	High	High	High	Peak Found	High	1		3	3	Present Both	1	GLYMA_15G250500	GLYMA_15G250500	sp|Q9LJE4|CPNB2_ARATH	Chaperonin 60 subunit beta 2, chloroplastic GN=CPN60B2	ident:527/591 pos:560/591 query:591 hit:596 align:597 bit:1027.3	OK	Chaperonin 60 subunit beta 2, chloroplastic (CPN-60 beta 2)	na	CPNB2_ARATH	Q9LJE4	na	CPN60B2	Cpn60-B(2)	Arabidopsis thaliana (Mouse-ear cress)	3702
High	Master Protein	GLYMA_09G138400	PTHR11655:SF14 - 54S RIBOSOMAL PROTEIN L6, MITOCHONDRIAL (1 of 2)	0	294.99	68	24	124	6	226	25	9.96	459.09	24	0	1.283	0.740874	59.42	76.9	123.1	84.96	73.77	High	High	High	High	High	Peak Found	1		3	3	Present Both	1	GLYMA_09G138400	GLYMA_09G138400	sp|O23049|RK6_ARATH	50S ribosomal protein L6, chloroplastic GN=RPL6	ident:177/226 pos:200/226 query:226 hit:223 align:226 bit:364.0	OK	50S ribosomal protein L6, chloroplastic	Protein EMBRYO DEFECTIVE 2394	RK6_ARATH	O23049	na	RPL6	EMB2394	Arabidopsis thaliana (Mouse-ear cress)	3702
High	Master Protein	GLYMA_08G224400	K02145 - V-type H+-transporting ATPase subunit A (ATPeV1A, ATP6A) (1 of 2)	0	294.131	28	14	92	2	623	68.7	5.67	421.94	14	0	0.01	1.22204e-16		200		50.07		Peak Found	High	Not Found	Not Found	High	Not Found	1		2	1	Only Control	1	GLYMA_08G224400	GLYMA_08G224400	sp|O23654|VATA_ARATH	V-type proton ATPase catalytic subunit A GN=VHA-A	ident:580/623 pos:599/623 query:623 hit:623 align:623 bit:1208.4	OK	V-type proton ATPase catalytic subunit A (V-ATPase subunit A)	V-ATPase 69 kDa subunit; Vacuolar H(+)-ATPase subunit A; Vacuolar proton pump subunit alpha	VATA_ARATH	O23654	na	VHA-A	na	Arabidopsis thaliana (Mouse-ear cress)	3702
High	Master Protein	GLYMA_08G175900	PTHR11353:SF8 - CHAPERONIN 60 SUBUNIT BETA 1, CHLOROPLASTIC-RELATED (1 of 3)	0	292.454	37	24	106	3	592	62.8	6.04	452.69	24	19	0.819	0.897177	39.12	108.2	91.8	27.05	25.63	Not Found	High	Not Found	Not Found	Peak Found	Not Found	1		1	1	Missing Both	1	GLYMA_08G175900	GLYMA_08G175900	sp|Q9LJE4|CPNB2_ARATH	Chaperonin 60 subunit beta 2, chloroplastic GN=CPN60B2	ident:525/592 pos:559/592 query:592 hit:596 align:597 bit:1023.5	OK	Chaperonin 60 subunit beta 2, chloroplastic (CPN-60 beta 2)	na	CPNB2_ARATH	Q9LJE4	na	CPN60B2	Cpn60-B(2)	Arabidopsis thaliana (Mouse-ear cress)	3702
High	Master Protein	GLYMA_05G106100	K03937 - NADH dehydrogenase (ubiquinone) Fe-S protein 4 (NDUFS4) (1 of 2)	0	284.927	74	20	176	8	146	16.3	9.8	618.8	20	12	0.943	0.981978	57.95	99.1	100.9	18.5	14.72	High	High	High	High	High	High	1		3	3	Present Both	1	GLYMA_05G106100	GLYMA_05G106100	sp|Q9FJW4|NDUS4_ARATH	NADH dehydrogenase [ubiquinone] iron-sulfur protein 4, mitochondrial GN=FRO1	ident:109/146 pos:128/146 query:146 hit:154 align:149 bit:224.9	OK	NADH dehydrogenase [ubiquinone] iron-sulfur protein 4, mitochondrial	Protein FROSTBITE1	NDUS4_ARATH	Q9FJW4	Q8LC28	FRO1	na	Arabidopsis thaliana (Mouse-ear cress)	3702
High	Master Protein	GLYMA_19G238800	K02955 - small subunit ribosomal protein S14e (RP-S14e, RPS14) (1 of 6)	0	284.554	81	19	140	19	150	16.3	10.87	533.08	19	0	1.191	0.858577	48.91	89.2	110.8	12.15	10.48	High	High	High	High	High	High	1		3	3	Present Both	1	GLYMA_19G238800	GLYMA_19G238800	sp|P42036|RS143_ARATH	40S ribosomal protein S14-3 GN=RPS14C	ident:126/150 pos:133/150 query:150 hit:150 align:139 bit:263.5	OK	40S ribosomal protein S14-3	na	RS143_ARATH	P42036	Q9SVD9	RPS14C	na	Arabidopsis thaliana (Mouse-ear cress)	3702
High	Master Protein	GLYMA_02G156800	PF00139 - Legume lectin domain (Lectin_legB) (1 of 90)	0	283.827	80	23	104	23	297	31.9	7.05	443.24	23	0	2.146	0.0600894	71.96	103.8	96.2	11.16	17.27	High	High	High	High	High	High	1		3	3	Present Both	1	GLYMA_02G156800	GLYMA_02G156800	sp|Q9LXA5|LRK91_ARATH	L-type lectin-domain containing receptor kinase IX.1 GN=LECRK91	ident:85/297 pos:125/297 query:297 hit:651 align:249 bit:112.1	Partial_match_hit	L-type lectin-domain containing receptor kinase IX.1 (LecRK-IX.1)	na	LRK91_ARATH	Q9LXA5	na	LECRK91	na	Arabidopsis thaliana (Mouse-ear cress)	3702
High	Master Protein	GLYMA_11G187900	PF02238 - Cytochrome c oxidase subunit VIIa (COX7a) (1 of 3)	0	283.733	84	9	193	9	67	7.6	9.92	831.69	9	0	1.163	0.896688	86.82	96.7	103.3	39.25	24.44	High	High	High	High	High	High	1		3	3	Present Both	1	GLYMA_11G187900	GLYMA_11G187900	sp|Q9C994|DTX14_ARATH	Protein DETOXIFICATION 14 GN=DTX14	ident:13/67 pos:23/67 query:67 hit:485 align:45 bit:26.6	Partial_match_hit	Protein DETOXIFICATION 14 (AtDTX14)	Multidrug and toxic compound extrusion protein 14 (MATE protein 14)	DTX14_ARATH	Q9C994	na	DTX14	na	Arabidopsis thaliana (Mouse-ear cress)	3702
High	Master Protein	GLYMA_17G160400	K03937 - NADH dehydrogenase (ubiquinone) Fe-S protein 4 (NDUFS4) (1 of 2)	0	283.276	74	20	166	8	146	16.3	9.85	609.65	20	0	0.782	0.827194	36.52	110.2	89.8	6.61	5.79	High	High	High	High	High	High	1		3	3	Present Both	1	GLYMA_17G160400	GLYMA_17G160400	sp|Q9FJW4|NDUS4_ARATH	NADH dehydrogenase [ubiquinone] iron-sulfur protein 4, mitochondrial GN=FRO1	ident:108/146 pos:128/146 query:146 hit:154 align:149 bit:224.6	OK	NADH dehydrogenase [ubiquinone] iron-sulfur protein 4, mitochondrial	Protein FROSTBITE1	NDUS4_ARATH	Q9FJW4	Q8LC28	FRO1	na	Arabidopsis thaliana (Mouse-ear cress)	3702
High	Master Protein	GLYMA_11G221000	KOG0651 - 26S proteasome regulatory complex, ATPase RPT4 (1 of 9)	0	281.622	52	24	121	8	443	48.6	6.65	424.56	24	14	0.625	0.490975	22.41	120.1	79.9	9.08	9.76	High	High	High	High	High	High	1		3	3	Present Both	1	GLYMA_11G221000	GLYMA_11G221000	sp|P10896|RCA_ARATH	Ribulose bisphosphate carboxylase/oxygenase activase, chloroplastic GN=RCA	ident:358/443 pos:395/443 query:443 hit:474 align:444 bit:732.6	OK	Ribulose bisphosphate carboxylase/oxygenase activase, chloroplastic (RA; RuBisCO activase)	na	RCA_ARATH	P10896	Q39197; Q39198; Q8H172; Q940T8; Q941B7	RCA	na	Arabidopsis thaliana (Mouse-ear cress)	3702
High	Master Protein	GLYMA_14G031800	PTHR31407:SF6 - OXYGEN-EVOLVING ENHANCER PROTEIN 2-1, CHLOROPLASTIC-RELATED (1 of 4)	0	277.861	56	19	112	18	264	28.6	7.87	433.93	19	1	1.193	0.856954	109.3	61.9	138.1	97.65	66.92	High	High	High	High	High	High	1		3	3	Present Both	1	GLYMA_14G031800	GLYMA_14G031800	sp|Q42029|PSBP1_ARATH	Oxygen-evolving enhancer protein 2-1, chloroplastic GN=PSBP1	ident:193/264 pos:228/264 query:264 hit:263 align:267 bit:390.6	OK	Oxygen-evolving enhancer protein 2-1, chloroplastic (OEE2)	23 kDa subunit of oxygen evolving system of photosystem II; 23 kDa thylakoid membrane protein; OEC 23 kDa subunit (OEC23)	PSBP1_ARATH	Q42029	na	PSBP1	PSBP	Arabidopsis thaliana (Mouse-ear cress)	3702
High	Master Protein	GLYMA_04G030800	KOG4042 - Dynactin subunit p27/WS-3, involved in transport of organelles along microtubules (1 of 1)	0	274.694	76	23	126	14	276	30	6.71	455.39	23	9	1.134	0.921221	55.99	97.3	102.7	14.1	6.17	High	High	High	High	High	High	1		3	3	Present Both	1	GLYMA_04G030800	GLYMA_04G030800	sp|Q9FWR5|GCA1_ARATH	Gamma carbonic anhydrase 1, mitochondrial GN=GAMMACA1	ident:225/276 pos:245/276 query:276 hit:275 align:269 bit:474.6	OK	Gamma carbonic anhydrase 1, mitochondrial (AtCA1; GAMMA CA1)	na	GCA1_ARATH	Q9FWR5	Q67XH5; Q682H9; Q8LF67; Q9LN36	GAMMACA1	na	Arabidopsis thaliana (Mouse-ear cress)	3702
High	Master Protein	GLYMA_12G041300	K02975 - small subunit ribosomal protein S25e (RP-S25e, RPS25) (1 of 4)	0	273.698	54	14	120	1	108	12	10.59	484.63	14	16	1.461	0.566256	82.68	92.2	107.8	87.49	88.75	High	High	High	High	High	High	1		3	3	Present Both	1	GLYMA_12G041300	GLYMA_12G041300	sp|Q9SIK2|RS252_ARATH	40S ribosomal protein S25-2 GN=RPS25B	ident:100/108 pos:106/108 query:108 hit:108 align:108 bit:169.5	OK	40S ribosomal protein S25-2	na	RS252_ARATH	Q9SIK2	na	RPS25B	na	Arabidopsis thaliana (Mouse-ear cress)	3702
High	Master Protein	GLYMA_07G195000	PTHR10639:SF7 - CLATHRIN LIGHT CHAIN (1 of 4)	0	273.228	42	29	129	1	310	34.1	5.35	443.66	29	9	0.974	0.999087	55.03	99.2	100.8	23.71	23.98	Peak Found	Peak Found	High	High	Not Found	Peak Found	1		3	2	Present Both	1	GLYMA_07G195000	GLYMA_07G195000	sp|Q9SKU1|CLC1_ARATH	Clathrin light chain 1 GN=CKX6	ident:161/310 pos:188/310 query:310 hit:338 align:290 bit:233.8	OK	Clathrin light chain 1	na	CLC1_ARATH	Q9SKU1	Q8LG44	OrderedLocusNames=At2g20760	na	Arabidopsis thaliana (Mouse-ear cress)	3702
High	Master Protein	GLYMA_08G042300	K02958 - small subunit ribosomal protein S15e (RP-S15e, RPS15) (1 of 4)	0	271.35	59	12	98	5	166	18.6	10.21	429.26	12	10	1.659	0.336925	74.29	66.8	133.2	71.64	41.69	High	Peak Found	High	High	High	High	1		3	3	Present Both	1	GLYMA_08G042300	GLYMA_08G042300	sp|Q9FY65|RS153_ARATH	40S ribosomal protein S15-3 GN=RPS15C	ident:133/166 pos:140/166 query:166 hit:150 align:154 bit:264.6	OK	40S ribosomal protein S15-3	na	RS153_ARATH	Q9FY65	na	RPS15C	na	Arabidopsis thaliana (Mouse-ear cress)	3702
High	Master Protein	GLYMA_04G142800	PTHR35742:SF1 - THYLAKOID LUMENAL 16.5 KDA PROTEIN, CHLOROPLASTIC (1 of 4)	0	270.34	53	16	111	8	227	24.2	9.2	553.85	16	0	1.075	0.96244	50.97	98.3	101.7	14.33	19.21	High	High	High	High	High	High	1		3	3	Present Both	1	GLYMA_04G142800	GLYMA_04G142800	sp|O22773|TL16_ARATH	Thylakoid lumenal 16.5 kDa protein, chloroplastic GN=TIP1-2	ident:116/227 pos:144/227 query:227 hit:216 align:183 bit:224.6	OK	Thylakoid lumenal 16.5 kDa protein, chloroplastic	na	TL16_ARATH	O22773	Q0WWR3; Q8L985; Q94BU6; Q9M110	OrderedLocusNames=At4g02530	na	Arabidopsis thaliana (Mouse-ear cress)	3702
High	Master Protein	GLYMA_08G086600	PTHR23076//PTHR23076:SF60 - METALLOPROTEASE M41 FTSH // SUBFAMILY NOT NAMED (1 of 4)	0	269.978	33	25	115	7	696	74.9	5.96	395.8	25	16	0.827	0.906801	36.73	114.9	85.1	17.43	23.77	High	High	High	High	High	High	1		3	3	Present Both	1	GLYMA_08G086600	GLYMA_08G086600	sp|O80860|FTSH2_ARATH	ATP-dependent zinc metalloprotease FTSH 2, chloroplastic GN=FTSH2	ident:579/696 pos:623/696 query:696 hit:695 align:689 bit:1144.0	OK	ATP-dependent zinc metalloprotease FTSH 2, chloroplastic (AtFTSH2)	Protein VARIEGATED 2	FTSH2_ARATH	O80860	Q56Z14; Q94AZ0	FTSH2	VAR2	Arabidopsis thaliana (Mouse-ear cress)	3702
High	Master Protein	GLYMA_07G034800	1.13.11.12//1.13.11.58 - Linoleate 13S-lipoxygenase / Lipoxidase // Linoleate 9S-lipoxygenase / Linoleate 9-lipoxygenase (1 of 3)	0	265.758	32	29	123	21	865	96.3	7.02	409.45	29	6	0.851	0.931502	35.43	121.5	78.5	15.35	8.93	High	High	High	High	High	High	1	Acetyl [N-Term]	3	3	Present Both	1	GLYMA_07G034800	GLYMA_07G034800	sp|Q06327|LOX1_ARATH	Linoleate 9S-lipoxygenase 1 GN=LOX1	ident:500/865 pos:638/865 query:865 hit:859 align:886 bit:1008.4	OK	Linoleate 9S-lipoxygenase 1	Lipoxygenase 1 (AtLOX1)	LOX1_ARATH	Q06327	Q9FZ30	LOX1	na	Arabidopsis thaliana (Mouse-ear cress)	3702
High	Master Protein	GLYMA_15G259200	K12158 - ubiquitin-like protein Nedd8 (NEDD8) (1 of 3)	0	264.505	70	16	120	16	154	17.2	6.06	468.74	16	0	1.085	0.953681	51.38	96.5	103.5	12.56	12.56	High	High	High	High	High	High	1		3	3	Present Both	1	GLYMA_15G259200	GLYMA_15G259200	sp|Q9M1P9|RUB1_ARATH	Ubiquitin-NEDD8-like protein RUB1 GN=RUB1	ident:151/154 pos:152/154 query:154 hit:156 align:152 bit:299.7	OK	NEDD8-like protein RUB1	Ubiquitin-related protein 1 (AtRUB1)	RUB1_ARATH	Q9SHE7	O80715; P59263; Q0WQU3; Q38875; Q9LDJ2; Q9LYW1; Q9M0W3; Q9M1P9; Q9S7X3	RUB1	NEDD8; UBQ15	Arabidopsis thaliana (Mouse-ear cress)	3702
High	Master Protein	GLYMA_10G042000	K02693 - photosystem I subunit IV (psaE) (1 of 4)	0	264.135	52	13	265	3	172	18.7	9.99	979.82	13	9	0.783	0.828036	32.22	114.4	85.6	18.95	22.1	High	High	High	High	High	High	1		3	3	Present Both	1	GLYMA_10G042000	GLYMA_10G042000	sp|Q9S714|PSAE2_ARATH	Photosystem I reaction center subunit IV B, chloroplastic GN=PSAE2	ident:84/172 pos:103/172 query:172 hit:145 align:143 bit:132.1	Poor_match	Photosystem I reaction center subunit IV B, chloroplastic (PSI-E B)	na	PSAE2_ARATH	Q9S714	na	PSAE2	na	Arabidopsis thaliana (Mouse-ear cress)	3702
High	Master Protein	GLYMA_01G211700	PTHR23050:SF214 - CALCIUM-BINDING PROTEIN CML14-RELATED (1 of 3)	0	263.967	88	21	145	5	147	16.5	4.88	512.78	21	18	1.115	0.93653	53.6	104.3	95.7	5.73	18.61	High	High	High	High	High	High	1		3	3	Present Both	1	GLYMA_01G211700	GLYMA_01G211700	sp|Q94AZ4|CML13_ARATH	Probable calcium-binding protein CML13 GN=CML13	ident:128/147 pos:142/147 query:147 hit:148 align:148 bit:263.8	OK	Probable calcium-binding protein CML13	Calmodulin-like protein 13	CML13_ARATH	Q94AZ4	Q42331; Q9LNB4	CML13	na	Arabidopsis thaliana (Mouse-ear cress)	3702
High	Master Protein	GLYMA_06G114800	PF00085//PF13098//PF13848 - Thioredoxin (Thioredoxin) // Thioredoxin-like domain (Thioredoxin_2) // Thioredoxin-like domain (Thioredoxin_6) (1 of 2)	0	260.808	60	30	75	7	503	56.1	4.98	264.72	30	0	1.673	0.712101	93.35	31.8	168.2	148.6	134.35	Peak Found	Peak Found	High	Not Found	Peak Found	High	1		3	2	Present Both	1	GLYMA_06G114800	GLYMA_06G114800	sp|Q9SRG3|PDI12_ARATH	Protein disulfide isomerase-like 1-2 GN=PDIL1-2	ident:335/503 pos:395/503 query:503 hit:508 align:482 bit:694.9	OK	Protein disulfide isomerase-like 1-2 (AtPDIL1-2)	Protein disulfide-isomerase 2 (PDI 2); Protein disulfide-isomerase 6 (AtPDI6)	PDI12_ARATH	Q9SRG3	Q0WV97	PDIL1-2	PDI6	Arabidopsis thaliana (Mouse-ear cress)	3702
High	Master Protein	GLYMA_07G269600	K02958 - small subunit ribosomal protein S15e (RP-S15e, RPS15) (1 of 4)	0	259.1	61	11	87	4	158	17.6	10.4	393.96	11	0	0.657	0.596219	11.05	0.2	199.8	173.02	99.87	Peak Found	Peak Found	High	Not Found	Peak Found	High	1		3	2	Present Both	1	GLYMA_07G269600	GLYMA_07G269600	sp|Q9FY65|RS153_ARATH	40S ribosomal protein S15-3 GN=RPS15C	ident:135/158 pos:141/158 query:158 hit:150 align:158 bit:267.3	OK	40S ribosomal protein S15-3	na	RS153_ARATH	Q9FY65	na	RPS15C	na	Arabidopsis thaliana (Mouse-ear cress)	3702
High	Master Protein	GLYMA_11G113900	K01527 - nascent polypeptide-associated complex subunit beta (EGD1, BTF3) (1 of 4)	0	258.02	56	10	81	6	162	17.7	7.4	448.97	10	4	1.362	0.655258	102.88	76.1	123.9	70.84	77.99	High	High	High	High	High	High	1		3	3	Present Both	1	GLYMA_11G113900	GLYMA_11G113900	sp|Q9SMW7|BTF3_ARATH	Basic transcription factor 3 GN=BTF3	ident:132/162 pos:139/162 query:162 hit:165 align:152 bit:259.2	OK	Basic transcription factor 3 (AtBTF3)	Nascent polypeptide-associated complex subunit beta	BTF3_ARATH	Q9SMW7	Q93ZB5	BTF3	na	Arabidopsis thaliana (Mouse-ear cress)	3702
High	Master Protein	GLYMA_11G030100	PTHR23050:SF214 - CALCIUM-BINDING PROTEIN CML14-RELATED (1 of 3)	0	253.994	86	20	131	4	147	16.5	4.88	481.56	20	0	1.42	0.596219	78.98	59.4	140.6	62.39	95.97	High	High	High	High	Peak Found	High	1		3	3	Present Both	1	GLYMA_11G030100	GLYMA_11G030100	sp|Q94AZ4|CML13_ARATH	Probable calcium-binding protein CML13 GN=CML13	ident:128/147 pos:142/147 query:147 hit:148 align:148 bit:264.2	OK	Probable calcium-binding protein CML13	Calmodulin-like protein 13	CML13_ARATH	Q94AZ4	Q42331; Q9LNB4	CML13	na	Arabidopsis thaliana (Mouse-ear cress)	3702
High	Master Protein	GLYMA_11G192500	PTHR21368:SF18 - 39S RIBOSOMAL PROTEIN L9, MITOCHONDRIAL (1 of 2)	0	251.822	62	20	106	6	198	22.2	9.89	437.49	20	14	1.034	0.974214	64.44	100.1	99.9	36.75	56.28	High	High	High	High	High	High	1		3	3	Present Both	1	GLYMA_11G192500	GLYMA_11G192500	sp|P25864|RK9_ARATH	50S ribosomal protein L9, chloroplastic GN=RPL9	ident:146/198 pos:171/198 query:198 hit:197 align:199 bit:269.2	OK	50S ribosomal protein L9, chloroplastic	CL9	RK9_ARATH	P25864	na	RPL9	na	Arabidopsis thaliana (Mouse-ear cress)	3702
High	Master Protein	GLYMA_15G273600	PTHR24089:SF316 - ADP,ATP CARRIER PROTEIN 1, MITOCHONDRIAL (1 of 4)	0	249.427	39	24	106	10	389	42.1	9.7	363.91	24	16	1.054	0.968928	87.16	72.1	127.9	85.5	35.92	High	High	High	High	High	High	1		3	3	Present Both	1	GLYMA_15G273600	GLYMA_15G273600	sp|P40941|ADT2_ARATH	ADP,ATP carrier protein 2, mitochondrial GN=AAC2	ident:320/389 pos:348/389 query:389 hit:385 align:393 bit:613.2	OK	ADP,ATP carrier protein 2, mitochondrial	ADP/ATP translocase 2; Adenine nucleotide translocator 2 (ANT 2)	ADT2_ARATH	P40941	Q9FY52	AAC2	ANT2	Arabidopsis thaliana (Mouse-ear cress)	3702
High	Master Protein	GLYMA_06G067400	K02109 - F-type H+-transporting ATPase subunit b (ATPF0B, atpF) (1 of 3)	0	247.409	48	14	90	3	215	23.4	5.83	396.51	14	13	0.674	0.609832	37.03	129.1	70.9	57.16	18.86	High	High	Not Found	High	Peak Found	High	1		2	3	Present Both	1	GLYMA_06G067400	GLYMA_06G067400	sp|Q9LZY0|MA654_ARATH	65-kDa microtubule-associated protein 4 GN=MAP65-4	ident:27/215 pos:40/215 query:215 hit:677 align:70 bit:31.2	Partial_match_both	65-kDa microtubule-associated protein 4 (AtMAP65-4)	na	MA654_ARATH	Q9LZY0	F4JD03	MAP65-4	na	Arabidopsis thaliana (Mouse-ear cress)	3702
High	Master Protein	GLYMA_04G008100	K03965 - NADH dehydrogenase (ubiquinone) 1 beta subcomplex subunit 9 (NDUFB9) (1 of 2)	0	246.68	80	17	124	6	115	13.5	7.58	472.43	17	9	1.08	0.957425	44.89	96.3	103.7	5.6	7.18	High	High	High	High	High	High	1		3	3	Present Both	1	GLYMA_04G008100	GLYMA_04G008100	sp|Q945M1|NDUB9_ARATH	NADH dehydrogenase [ubiquinone] 1 beta subcomplex subunit 9 GN=CIB22	ident:94/115 pos:99/115 query:115 hit:117 align:113 bit:196.1	OK	NADH dehydrogenase [ubiquinone] 1 beta subcomplex subunit 9	B22 subunit of eukaryotic mitochondrial complex I; Complex I-B22 (AtCIB22; CI-B22); NADH-ubiquinone oxidoreductase B22 subunit	NDUB9_ARATH	Q945M1	O65692; Q56Z32; Q8LDS9	CIB22	na	Arabidopsis thaliana (Mouse-ear cress)	3702
High	Master Protein	GLYMA_05G135300	K02151 - V-type H+-transporting ATPase subunit F (ATPeV1F, ATP6S14) (1 of 2)	0	245.784	94	15	92	15	130	14.5	6.57	368.84	15	0	0.94	0.981586	48.55	111.4	88.6	25.05	61.8	High	High	High	High	High	High	1		3	3	Present Both	1	GLYMA_05G135300	GLYMA_05G135300	sp|Q9ZQX4|VATF_ARATH	V-type proton ATPase subunit F GN=VHA-F	ident:109/130 pos:119/130 query:130 hit:128 align:126 bit:231.9	OK	V-type proton ATPase subunit F (V-ATPase subunit F)	V-ATPase 14 kDa subunit; Vacuolar H(+)-ATPase subunit F; Vacuolar proton pump subunit F	VATF_ARATH	Q9ZQX4	na	VHA-F	VATF	Arabidopsis thaliana (Mouse-ear cress)	3702
High	Master Protein	GLYMA_04G019100	PTHR23076:SF33 - ATP-DEPENDENT ZINC METALLOPROTEASE FTSH 1, CHLOROPLASTIC-RELATED (1 of 2)	0	244.786	24	18	92	2	694	74.1	6.19	355.31	18	0	0.606	0.443987	25.5	136.9	63.1	21.85	27.67	High	High	Peak Found	High	Peak Found	High	1		3	3	Present Both	1	GLYMA_04G019100	GLYMA_04G019100	sp|Q9FH02|FTSH5_ARATH	ATP-dependent zinc metalloprotease FTSH 5, chloroplastic GN=FTSH5	ident:593/694 pos:633/694 query:694 hit:704 align:703 bit:1132.9	OK	ATP-dependent zinc metalloprotease FTSH 5, chloroplastic (AtFTSH5)	Protein VARIEGATED 1	FTSH5_ARATH	Q9FH02	na	FTSH5	FTSH2; VAR1	Arabidopsis thaliana (Mouse-ear cress)	3702
High	Master Protein	GLYMA_06G019400	PTHR23076:SF33 - ATP-DEPENDENT ZINC METALLOPROTEASE FTSH 1, CHLOROPLASTIC-RELATED (1 of 2)	0	243.149	26	19	93	3	696	74.3	6.24	355.46	19	18	0.755	0.760303	29.46	122.4	77.6	16.13	2.46	High	High	High	High	High	High	1		3	3	Present Both	1	GLYMA_06G019400	GLYMA_06G019400	sp|Q9FH02|FTSH5_ARATH	ATP-dependent zinc metalloprotease FTSH 5, chloroplastic GN=FTSH5	ident:586/696 pos:634/696 query:696 hit:704 align:699 bit:1125.5	OK	ATP-dependent zinc metalloprotease FTSH 5, chloroplastic (AtFTSH5)	Protein VARIEGATED 1	FTSH5_ARATH	Q9FH02	na	FTSH5	FTSH2; VAR1	Arabidopsis thaliana (Mouse-ear cress)	3702
High	Master Protein	GLYMA_06G224200	PTHR35742:SF1 - THYLAKOID LUMENAL 16.5 KDA PROTEIN, CHLOROPLASTIC (1 of 4)	0	242.736	53	17	93	9	229	24.7	8.63	430.22	17	9	1.092	0.948995	46.71	101.5	98.5	6.71	20.78	High	High	High	High	High	High	1		3	3	Present Both	1	GLYMA_06G224200	GLYMA_06G224200	sp|O22773|TL16_ARATH	Thylakoid lumenal 16.5 kDa protein, chloroplastic GN=TIP1-2	ident:121/229 pos:155/229 query:229 hit:216 align:205 bit:232.3	OK	Thylakoid lumenal 16.5 kDa protein, chloroplastic	na	TL16_ARATH	O22773	Q0WWR3; Q8L985; Q94BU6; Q9M110	OrderedLocusNames=At4g02530	na	Arabidopsis thaliana (Mouse-ear cress)	3702
High	Master Protein	GLYMA_01G015500	PF00076 - RNA recognition motif. (a.k.a. RRM, RBD, or RNP domain) (RRM_1) (1 of 477)	0	239.508	63	16	73	5	279	29.8	6.4	304.19	16	13	0.879	0.957018	49.17	100.9	99.1	72.72	58.67	High	High	High	High	High	High	1		3	3	Present Both	1	GLYMA_01G015500	GLYMA_01G015500	sp|Q9LFD5|BPA1_ARATH	Binding partner of ACD11 1 GN=BPA1	ident:150/279 pos:194/279 query:279 hit:259 align:234 bit:298.1	OK	Binding partner of ACD11 1	na	BPA1_ARATH	Q9LFD5	A8MQX8; A8MSB5; C0Z220; Q93Z43	BPA1	na	Arabidopsis thaliana (Mouse-ear cress)	3702
High	Master Protein	GLYMA_08G304200	PTHR31407:SF6 - OXYGEN-EVOLVING ENHANCER PROTEIN 2-1, CHLOROPLASTIC-RELATED (1 of 4)	0	239.204	59	16	87	7	262	28.2	7.44	337.26	16	0	0.904	0.969121	70.84	74.7	125.3	75.42	36.37	High	High	High	High	High	High	1		3	3	Present Both	1	GLYMA_08G304200	GLYMA_08G304200	sp|Q42029|PSBP1_ARATH	Oxygen-evolving enhancer protein 2-1, chloroplastic GN=PSBP1	ident:201/262 pos:226/262 query:262 hit:263 align:267 bit:404.8	OK	Oxygen-evolving enhancer protein 2-1, chloroplastic (OEE2)	23 kDa subunit of oxygen evolving system of photosystem II; 23 kDa thylakoid membrane protein; OEC 23 kDa subunit (OEC23)	PSBP1_ARATH	Q42029	na	PSBP1	PSBP	Arabidopsis thaliana (Mouse-ear cress)	3702
High	Master Protein	GLYMA_18G049400	PF10674 - Protein of unknown function (DUF2488) (Ycf54) (1 of 2)	0	236.062	56	14	91	6	234	26.7	6.42	372.26	14	11	1.25	0.774171	50.22	93.3	106.7	8.65	15.27	High	High	High	High	High	High	1		3	3	Present Both	1	GLYMA_18G049400	GLYMA_18G049400	sp|Q9SVL0|ZHD7_ARATH	Zinc-finger homeodomain protein 7 GN=ZHD7	ident:11/234 pos:15/234 query:234 hit:249 align:24 bit:29.6	Partial_match_both	Zinc-finger homeodomain protein 7 (AtZHD7)	Homeobox protein 28 (AtHB-28)	ZHD7_ARATH	Q9SVL0	Q8LDG1	ZHD7	HB28	Arabidopsis thaliana (Mouse-ear cress)	3702
High	Master Protein	GLYMA_18G114900	PTHR31407:SF6 - OXYGEN-EVOLVING ENHANCER PROTEIN 2-1, CHLOROPLASTIC-RELATED (1 of 4)	0	235.988	58	16	85	7	265	28.4	7.87	352.28	16	7	1.224	0.816609	104.62	90.8	109.2	88.84	82.27	High	High	High	High	High	High	1		3	3	Present Both	1	GLYMA_18G114900	GLYMA_18G114900	sp|Q42029|PSBP1_ARATH	Oxygen-evolving enhancer protein 2-1, chloroplastic GN=PSBP1	ident:200/265 pos:226/265 query:265 hit:263 align:270 bit:396.0	OK	Oxygen-evolving enhancer protein 2-1, chloroplastic (OEE2)	23 kDa subunit of oxygen evolving system of photosystem II; 23 kDa thylakoid membrane protein; OEC 23 kDa subunit (OEC23)	PSBP1_ARATH	Q42029	na	PSBP1	PSBP	Arabidopsis thaliana (Mouse-ear cress)	3702
High	Master Protein	GLYMA_19G109000	PF14200 - Ricin-type beta-trefoil lectin domain-like (RicinB_lectin_2) (1 of 3)	0	235.128	37	14	96	7	326	36.3	7.09	412.98	14	9	1.351	0.66868	46.37	88.3	111.7	10.38	13.43	High	High	High	High	High	High	1		3	3	Present Both	1	GLYMA_19G109000	GLYMA_19G109000	sp|Q945P1|EULS3_ARATH	Ricin B-like lectin EULS3 GN=EULS3	ident:156/326 pos:193/326 query:326 hit:317 align:317 bit:263.5	Poor_match	Ricin B-like lectin EULS3	Euonymus lectin S3 (AtEULS3)	EULS3_ARATH	Q945P1	Q9ZV03	EULS3	na	Arabidopsis thaliana (Mouse-ear cress)	3702
High	Master Protein	GLYMA_13G129400	K02693 - photosystem I subunit IV (psaE) (1 of 4)	0	233.836	67	12	256	2	129	13.8	9.6	924.34	12	0	0.697	0.655258	12.25	123	77	17.63	8.89	High	High	High	High	High	High	1		3	3	Present Both	1	GLYMA_13G129400	GLYMA_13G129400	sp|Q9S714|PSAE2_ARATH	Photosystem I reaction center subunit IV B, chloroplastic GN=PSAE2	ident:80/129 pos:99/129 query:129 hit:145 align:143 bit:132.1	OK	Photosystem I reaction center subunit IV B, chloroplastic (PSI-E B)	na	PSAE2_ARATH	Q9S714	na	PSAE2	na	Arabidopsis thaliana (Mouse-ear cress)	3702
High	Master Protein	GLYMA_04G066000	K02109 - F-type H+-transporting ATPase subunit b (ATPF0B, atpF) (1 of 3)	0	232.706	48	13	86	2	215	23.5	5.83	364.93	13	0	0.139	4.6344e-05	10.57	175.6	24.4		136.51	Not Found	Not Found	Peak Found	High	Not Found	High	1		1	2	Only Sample	1	GLYMA_04G066000	GLYMA_04G066000	sp|Q9LZY0|MA654_ARATH	65-kDa microtubule-associated protein 4 GN=MAP65-4	ident:27/215 pos:40/215 query:215 hit:677 align:70 bit:31.6	Partial_match_both	65-kDa microtubule-associated protein 4 (AtMAP65-4)	na	MA654_ARATH	Q9LZY0	F4JD03	MAP65-4	na	Arabidopsis thaliana (Mouse-ear cress)	3702
High	Master Protein	GLYMA_08G082900	K08912 - light-harvesting complex II chlorophyll a/b binding protein 1 (LHCB1) (1 of 5)	0	231.81	65	16	101	4	263	27.9	5.43	421.32	16	11	0.819	0.897177	37.02	118.8	81.2	20.57	11.91	High	High	High	High	High	High	1		3	3	Present Both	1	GLYMA_08G082900	GLYMA_08G082900	sp|P04778|CB1C_ARATH	Chlorophyll a-b binding protein 1, chloroplastic GN=LHCB1.3	ident:236/263 pos:249/263 query:263 hit:267 align:266 bit:472.2	OK	Chlorophyll a-b binding protein 1, chloroplastic	Chlorophyll a-b protein 140 (CAB-140); LHCII type I CAB-1	CB1C_ARATH	P04778	P83754	LHCB1.3	AB140; CAB1	Arabidopsis thaliana (Mouse-ear cress)	3702
High	Master Protein	GLYMA_08G200000	3.1.3.2 - Acid phosphatase / Phosphomonoesterase (1 of 61)	0	230.922	50	15	106	15	267	30.3	7.83	401.42	15	0	1.453	0.571531	77.38	82	118	52.91	54.2	High	High	High	High	High	High	1		3	3	Present Both	1	GLYMA_08G200000	GLYMA_08G200000	sp|O49195|VSP1_ARATH	Vegetative storage protein 1 GN=VSP1	ident:108/267 pos:145/267 query:267 hit:270 align:230 bit:197.6	Poor_match	Vegetative storage protein 1	na	VSP1_ARATH	O49195	O23827; O82121; Q39259; Q42000; Q93VJ6	VSP1	na	Arabidopsis thaliana (Mouse-ear cress)	3702
High	Master Protein	GLYMA_01G193700	PTHR11743:SF29 - MITOCHONDRIAL OUTER MEMBRANE PROTEIN PORIN 2-RELATED (1 of 2)	0	228.977	84	21	96	6	276	29.1	9.11	376.76	21	14	1.252	0.77283	61.06	82.5	117.5	35.14	36.22	High	High	High	High	High	High	1		3	3	Present Both	1	GLYMA_01G193700	GLYMA_01G193700	sp|Q9FJX3|VDAC2_ARATH	Mitochondrial outer membrane protein porin 2 GN=VDAC2	ident:193/276 pos:237/276 query:276 hit:276 align:276 bit:412.1	OK	Mitochondrial outer membrane protein porin 2	Voltage-dependent anion-selective channel protein 2 (AtVDAC2; VDAC-2)	VDAC2_ARATH	Q9FJX3	na	VDAC2	na	Arabidopsis thaliana (Mouse-ear cress)	3702
High	Master Protein	GLYMA_12G081500	PTHR21368:SF18 - 39S RIBOSOMAL PROTEIN L9, MITOCHONDRIAL (1 of 2)	0	226.492	61	17	105	3	197	22.1	9.92	423.95	17	0	0.986	0.999087	29.6	106.1	93.9	65.43	67.74	High	High	High	High	High	High	1		3	3	Present Both	1	GLYMA_12G081500	GLYMA_12G081500	sp|P25864|RK9_ARATH	50S ribosomal protein L9, chloroplastic GN=RPL9	ident:145/197 pos:173/197 query:197 hit:197 align:198 bit:271.2	OK	50S ribosomal protein L9, chloroplastic	CL9	RK9_ARATH	P25864	na	RPL9	na	Arabidopsis thaliana (Mouse-ear cress)	3702
High	Master Protein	GLYMA_11G115400	K02975 - small subunit ribosomal protein S25e (RP-S25e, RPS25) (1 of 4)	0	226.253	55	13	98	3	105	11.7	10.68	375.62	13	0	1.508	0.596219	121.65	52.2	147.8	132.93	98.57	Peak Found	Peak Found	High	Peak Found	Peak Found	High	1		3	3	Present Both	1	GLYMA_11G115400	GLYMA_11G115400	sp|Q9SIK2|RS252_ARATH	40S ribosomal protein S25-2 GN=RPS25B	ident:97/105 pos:102/105 query:105 hit:108 align:104 bit:162.9	OK	40S ribosomal protein S25-2	na	RS252_ARATH	Q9SIK2	na	RPS25B	na	Arabidopsis thaliana (Mouse-ear cress)	3702
High	Master Protein	GLYMA_08G346200	K17732 - mitochondrial-processing peptidase subunit beta [EC:3.4.24.64] (PMPCB, MAS1) (1 of 3)	0	225.677	59	28	98	9	528	58.9	6.98	312.08	28	17	0.837	0.921221	38.67	108.3	91.7	42.41	22.48	High	High	High	High	High	High	1		3	3	Present Both	1	GLYMA_08G346200	GLYMA_08G346200	sp|Q42290|MPPB_ARATH	Probable mitochondrial-processing peptidase subunit beta, mitochondrial GN=MORF8	ident:415/528 pos:470/528 query:528 hit:531 align:534 bit:878.2	OK	Probable mitochondrial-processing peptidase subunit beta, mitochondrial	Beta-MPP	MPPB_ARATH	Q42290	Q0WWT6; Q9SGA7	OrderedLocusNames=At3g02090	na	Arabidopsis thaliana (Mouse-ear cress)	3702
High	Master Protein	GLYMA_11G030700	PF00805 - Pentapeptide repeats (8 copies) (Pentapeptide) (1 of 6)	0	224.023	52	15	96	15	266	28.3	7.39	391.54	15	0	0.987	0.999087	58.34	108.8	91.2	3.15	26.43	High	High	High	High	High	High	1		3	3	Present Both	1	GLYMA_11G030700	GLYMA_11G030700	sp|Q8H1Q1|TL203_ARATH	Thylakoid lumenal protein TL20.3, chloroplastic GN=TL20.3	ident:197/266 pos:228/266 query:266 hit:280 align:280 bit:362.5	OK	Thylakoid lumenal protein TL20.3, chloroplastic	na	TL203_ARATH	Q8H1Q1	Q94C72; Q9FWX1	TL20.3	na	Arabidopsis thaliana (Mouse-ear cress)	3702
High	Master Protein	GLYMA_11G048200	PTHR11743:SF29 - MITOCHONDRIAL OUTER MEMBRANE PROTEIN PORIN 2-RELATED (1 of 2)	0	221.174	72	20	91	5	276	29.2	9.29	353.84	20	0	0.967	0.999087	79.03	79.3	120.7	72.99	38.22	High	High	High	High	High	High	1		3	3	Present Both	1	GLYMA_11G048200	GLYMA_11G048200	sp|Q9FJX3|VDAC2_ARATH	Mitochondrial outer membrane protein porin 2 GN=VDAC2	ident:196/276 pos:237/276 query:276 hit:276 align:276 bit:416.0	OK	Mitochondrial outer membrane protein porin 2	Voltage-dependent anion-selective channel protein 2 (AtVDAC2; VDAC-2)	VDAC2_ARATH	Q9FJX3	na	VDAC2	na	Arabidopsis thaliana (Mouse-ear cress)	3702
High	Master Protein	GLYMA_05G128000	K08912 - light-harvesting complex II chlorophyll a/b binding protein 1 (LHCB1) (1 of 5)	0	221.013	65	15	91	6	263	27.9	5.43	367.13	15	0	0.482	0.121853	10.29	136	64	51.96	36.24	High	High	High	High	High	High	1		3	3	Present Both	1	GLYMA_05G128000	GLYMA_05G128000	sp|P04778|CB1C_ARATH	Chlorophyll a-b binding protein 1, chloroplastic GN=LHCB1.3	ident:238/263 pos:249/263 query:263 hit:267 align:266 bit:474.9	OK	Chlorophyll a-b binding protein 1, chloroplastic	Chlorophyll a-b protein 140 (CAB-140); LHCII type I CAB-1	CB1C_ARATH	P04778	P83754	LHCB1.3	AB140; CAB1	Arabidopsis thaliana (Mouse-ear cress)	3702
High	Master Protein	GLYMA_05G132000	PTHR23076//PTHR23076:SF60 - METALLOPROTEASE M41 FTSH // SUBFAMILY NOT NAMED (1 of 4)	0	220.874	33	23	102	5	695	74.8	5.73	346.99	23	0	0.915	0.974214	27.17	107.7	92.3	33.23	17.07	High	High	High	High	High	High	1		3	3	Present Both	1	GLYMA_05G132000	GLYMA_05G132000	sp|O80860|FTSH2_ARATH	ATP-dependent zinc metalloprotease FTSH 2, chloroplastic GN=FTSH2	ident:580/695 pos:625/695 query:695 hit:695 align:689 bit:1148.7	OK	ATP-dependent zinc metalloprotease FTSH 2, chloroplastic (AtFTSH2)	Protein VARIEGATED 2	FTSH2_ARATH	O80860	Q56Z14; Q94AZ0	FTSH2	VAR2	Arabidopsis thaliana (Mouse-ear cress)	3702
High	Master Protein	GLYMA_04G188700	K02358 - elongation factor Tu (tuf, TUFM) (1 of 8)	0	218.922	33	16	72	5	480	52.2	6.68	313.51	16	9	0.868	0.947586	46.67	103.5	96.5	42.12	48.53	High	High	High	High	High	High	1		3	3	Present Both	1	GLYMA_04G188700	GLYMA_04G188700	sp|P17745|EFTU_ARATH	Elongation factor Tu, chloroplastic GN=TUFA	ident:392/480 pos:425/480 query:480 hit:476 align:468 bit:771.5	OK	Elongation factor Tu, chloroplastic (EF-Tu)	Ras-related protein RABE1b (AtRABE1b); Ras-related protein Rab8D (AtRab8D)	EFTU_ARATH	P17745	Q8GTE7	TUFA	RAB8D; RABE1B	Arabidopsis thaliana (Mouse-ear cress)	3702
High	Master Protein	GLYMA_06G007900	K03965 - NADH dehydrogenase (ubiquinone) 1 beta subcomplex subunit 9 (NDUFB9) (1 of 2)	0	218.148	59	15	107	4	122	14.3	9.33	392.15	15	0	1.242	0.816623	35.27	89.8	110.2	49.81	35.87	High	High	Peak Found	High	High	High	1		3	3	Present Both	1	GLYMA_06G007900	GLYMA_06G007900	sp|Q945M1|NDUB9_ARATH	NADH dehydrogenase [ubiquinone] 1 beta subcomplex subunit 9 GN=CIB22	ident:84/122 pos:90/122 query:122 hit:117 align:108 bit:173.7	OK	NADH dehydrogenase [ubiquinone] 1 beta subcomplex subunit 9	B22 subunit of eukaryotic mitochondrial complex I; Complex I-B22 (AtCIB22; CI-B22); NADH-ubiquinone oxidoreductase B22 subunit	NDUB9_ARATH	Q945M1	O65692; Q56Z32; Q8LDS9	CIB22	na	Arabidopsis thaliana (Mouse-ear cress)	3702
High	Master Protein	GLYMA_09G206900	PF00076 - RNA recognition motif. (a.k.a. RRM, RBD, or RNP domain) (RRM_1) (1 of 477)	0	215.229	66	15	65	4	280	29.8	6.15	249.67	15	0	1.34	0.687101	86.69	121.2	78.8	86.77	100.17	High	High	High	High	High	High	1		3	3	Present Both	1	GLYMA_09G206900	GLYMA_09G206900	sp|Q9LFD5|BPA1_ARATH	Binding partner of ACD11 1 GN=BPA1	ident:152/280 pos:194/280 query:280 hit:259 align:236 bit:302.8	OK	Binding partner of ACD11 1	na	BPA1_ARATH	Q9LFD5	A8MQX8; A8MSB5; C0Z220; Q93Z43	BPA1	na	Arabidopsis thaliana (Mouse-ear cress)	3702
High	Master Protein	GLYMA_05G089000	K03231 - elongation factor 1-alpha (EEF1A) (1 of 8)	0	214.027	27	14	122	4	447	49.3	9.06	424.6	14	13	0.653	0.567022	23.04	128.6	71.4	24.08	12.56	High	High	High	High	High	High	1		3	3	Present Both	1	GLYMA_05G089000	GLYMA_05G089000	sp|Q8GTY0|EF1A4_ARATH	Elongation factor 1-alpha 4 GN=A4	ident:425/447 pos:440/447 query:447 hit:449 align:446 bit:886.7	OK	Elongation factor 1-alpha 4 (EF-1-alpha 4)	eEF-1A4	EF1A4_ARATH	Q8GTY0	P13905; Q0WSD5; Q39093; Q9C5L4	A4	na	Arabidopsis thaliana (Mouse-ear cress)	3702
High	Master Protein	GLYMA_14G177200	PTHR31356:SF6 - THYLAKOID LUMENAL 29 KDA PROTEIN, CHLOROPLASTIC (1 of 2)	0	212.396	65	20	69	7	347	37.9	7.18	246.37	20	11	1.386	0.640747	52.57	83.5	116.5	30.2	16.32	High	High	High	High	High	High	1		3	3	Present Both	1	GLYMA_14G177200	GLYMA_14G177200	sp|P82281|TL29_ARATH	Thylakoid lumenal 29 kDa protein, chloroplastic GN=TL29	ident:244/347 pos:274/347 query:347 hit:349 align:351 bit:476.5	OK	Thylakoid lumenal 29 kDa protein, chloroplastic (TL29)	AtAPx07; P29; Probable L-ascorbate peroxidase 4	TL29_ARATH	P82281	Q7XZP6; Q9M0S6	TL29	APX4	Arabidopsis thaliana (Mouse-ear cress)	3702
High	Master Protein	GLYMA_09G072100	PTHR10772:SF0 - 20 KDA CHAPERONIN, CHLOROPLASTIC (1 of 4)	0	211.996	72	15	92	2	253	26.6	7.39	353	15	12	1.216	0.827194	59.71	101.1	98.9	58.93	55.98	High	High	High	High	High	High	1		3	3	Present Both	1	GLYMA_09G072100	GLYMA_09G072100	sp|O65282|CH20_ARATH	20 kDa chaperonin, chloroplastic GN=CPN20	ident:192/253 pos:222/253 query:253 hit:253 align:256 bit:377.9	OK	20 kDa chaperonin, chloroplastic	Chaperonin 10 (Ch-CPN10; Cpn10); Chaperonin 20; Protein Cpn21	CH20_ARATH	O65282	Q9TNN2	CPN20	CHCPN10; CPN21	Arabidopsis thaliana (Mouse-ear cress)	3702
High	Master Protein	GLYMA_01G022100	K11251 - histone H2A (H2A) (1 of 24)	0	210.658	64	10	72	6	135	14	10.05	341	10	3	1.605	0.403894	55	73.7	126.3	24.91	26.7	High	High	High	High	High	High	1		3	3	Present Both	1	GLYMA_01G022100	GLYMA_01G022100	sp|Q9LD28|H2A6_ARATH	Histone H2A.6 GN=RAT5	ident:122/135 pos:122/135 query:135 hit:130 align:125 bit:241.9	OK	Histone H2A.6	HTA1; Protein RESISTANT TO AGROBACTERIUM TRANSFORMATION 5	H2A6_ARATH	Q9LD28	na	RAT5	H2A-1	Arabidopsis thaliana (Mouse-ear cress)	3702
High	Master Protein	GLYMA_01G234200		0	206.276	45	15	89	15	157	17.3	9.54	337.42	15	0	0.984	0.999087	47.93	99.8	100.2	33.82	33.19	High	High	High	High	High	High	1		3	3	Present Both	1	GLYMA_01G234200	GLYMA_01G234200	sp|Q8L840|RQL4A_ARATH	ATP-dependent DNA helicase Q-like 4A GN=RECQL4A	ident:34/157 pos:43/157 query:157 hit:1188 align:101 bit:28.1	Partial_match_hit	ATP-dependent DNA helicase Q-like 4A	RecQ-like protein 4A (AtRecQ4A; AtRecQl4A); SGS1-like protein (AtSGS1)	RQL4A_ARATH	Q8L840	O04092; Q9FT71	RECQL4A	RECQ4A; RQL4A; SGS1	Arabidopsis thaliana (Mouse-ear cress)	3702
High	Master Protein	GLYMA_19G052400	K03231 - elongation factor 1-alpha (EEF1A) (1 of 8)	0	205.55	31	14	111	1	447	49.2	9.07	389.82	14	0	0.9	0.963822	41.22	97.7	102.3	40.55	46.39	High	High	High	Peak Found	High	High	1		3	3	Present Both	1	GLYMA_19G052400	GLYMA_19G052400	sp|Q8GTY0|EF1A4_ARATH	Elongation factor 1-alpha 4 GN=A4	ident:433/447 pos:440/447 query:447 hit:449 align:446 bit:897.9	OK	Elongation factor 1-alpha 4 (EF-1-alpha 4)	eEF-1A4	EF1A4_ARATH	Q8GTY0	P13905; Q0WSD5; Q39093; Q9C5L4	A4	na	Arabidopsis thaliana (Mouse-ear cress)	3702
High	Master Protein	GLYMA_03G180700	K02152 - V-type H+-transporting ATPase subunit G (ATPeV1G, ATP6G) (1 of 4)	0	204.5	83	14	97	5	110	12.3	7.5	432.01	14	0	1.094	0.948505	43.26	93.9	106.1	29.96	11.31	High	High	High	High	High	High	1		3	3	Present Both	1	GLYMA_03G180700	GLYMA_03G180700	sp|O82628|VATG1_ARATH	V-type proton ATPase subunit G1 GN=VHA-G1	ident:84/110 pos:94/110 query:110 hit:110 align:110 bit:142.5	OK	V-type proton ATPase subunit G1 (V-ATPase subunit G1)	Vacuolar H(+)-ATPase subunit G isoform 1; Vacuolar proton pump subunit G1	VATG1_ARATH	O82628	na	VHA-G1	AVMA10; VAG1; VATG1; VMA10	Arabidopsis thaliana (Mouse-ear cress)	3702
High	Master Protein	GLYMA_13G181500	PTHR10639:SF7 - CLATHRIN LIGHT CHAIN (1 of 4)	0	204.32	39	22	96	2	303	33.5	5.34	333.43	22	0	0.867	0.941929	22.65	109.7	90.3	46.5	35.54	High	High	Peak Found	High	Peak Found	Peak Found	1		3	3	Present Both	1	GLYMA_13G181500	GLYMA_13G181500	sp|Q9SKU1|CLC1_ARATH	Clathrin light chain 1 GN=CKX6	ident:160/303 pos:189/303 query:303 hit:338 align:301 bit:226.1	OK	Clathrin light chain 1	na	CLC1_ARATH	Q9SKU1	Q8LG44	OrderedLocusNames=At2g20760	na	Arabidopsis thaliana (Mouse-ear cress)	3702
High	Master Protein	GLYMA_05G178000	K02904 - large subunit ribosomal protein L29 (RP-L29, rpmC) (1 of 2)	0	201.489	60	17	90	7	161	18.3	10.08	329.78	17	10	0.729	0.727639	25.08	112.9	87.1	14.23	35.37	High	High	High	High	High	High	1		3	3	Present Both	1	GLYMA_05G178000	GLYMA_05G178000	sp|Q9FJP3|RK29_ARATH	50S ribosomal protein L29, chloroplastic GN=RPL29	ident:96/161 pos:116/161 query:161 hit:173 align:157 bit:174.1	OK	50S ribosomal protein L29, chloroplastic	CL29	RK29_ARATH	Q9FJP3	na	RPL29	na	Arabidopsis thaliana (Mouse-ear cress)	3702
High	Master Protein	GLYMA_15G180900	PTHR10772:SF0 - 20 KDA CHAPERONIN, CHLOROPLASTIC (1 of 4)	0	201.456	70	14	84	1	253	26.7	8.19	336.26	14	0	1.553	0.527214	60.63	78.3	121.7	34.16	67.19	High	High	High	High	High	High	1		3	3	Present Both	1	GLYMA_15G180900	GLYMA_15G180900	sp|O65282|CH20_ARATH	20 kDa chaperonin, chloroplastic GN=CPN20	ident:193/253 pos:222/253 query:253 hit:253 align:256 bit:380.9	OK	20 kDa chaperonin, chloroplastic	Chaperonin 10 (Ch-CPN10; Cpn10); Chaperonin 20; Protein Cpn21	CH20_ARATH	O65282	Q9TNN2	CPN20	CHCPN10; CPN21	Arabidopsis thaliana (Mouse-ear cress)	3702
High	Master Protein	GLYMA_08G173700	K03541 - photosystem II 10kDa protein (psbR) (1 of 2)	0	200.748	35	9	109	2	139	14.3	9.7	406.55	9	9	0.833	0.914542	37.53	113.5	86.5	16.05	18.96	High	High	High	High	High	High	1		3	3	Present Both	1	GLYMA_08G173700	GLYMA_08G173700	sp|P27202|PSBR_ARATH	Photosystem II 10 kDa polypeptide, chloroplastic GN=PSBR	ident:108/139 pos:123/139 query:139 hit:140 align:140 bit:214.2	OK	Photosystem II 10 kDa polypeptide, chloroplastic	na	PSBR_ARATH	P27202	na	PSBR	ART1	Arabidopsis thaliana (Mouse-ear cress)	3702
High	Master Protein	GLYMA_06G030700	PTHR13061//PTHR13061:SF10 - DYNACTIN SUBUNIT P25 // SUBFAMILY NOT NAMED (1 of 1)	0	199.992	62	15	94	7	273	29.6	6.15	364.49	15	0	0.957	0.996158	39.44	112.2	87.8	18.07	57.58	High	High	High	High	High	High	1		3	3	Present Both	1	GLYMA_06G030700	GLYMA_06G030700	sp|Q9C6B3|GCA2_ARATH	Gamma carbonic anhydrase 2, mitochondrial GN=GAMMACA2	ident:217/273 pos:250/273 query:273 hit:278 align:264 bit:470.7	OK	Gamma carbonic anhydrase 2, mitochondrial (AtCA2; GAMMA CA2)	Transcription factor APFI	GCA2_ARATH	Q9C6B3	Q9C5S7	GAMMACA2	APFI	Arabidopsis thaliana (Mouse-ear cress)	3702
High	Master Protein	GLYMA_16G205200	K08916 - light-harvesting complex II chlorophyll a/b binding protein 5 (LHCB5) (1 of 4)	0	199.524	37	14	79	7	289	30.7	6	275.62	14	7	0.79	0.850785	37.33	99.5	100.5	40.04	16.38	High	High	High	High	High	High	1		3	3	Present Both	1	GLYMA_16G205200	GLYMA_16G205200	sp|Q9XF89|CB5_ARATH	Chlorophyll a-b binding protein CP26, chloroplastic GN=LHCB5	ident:229/289 pos:251/289 query:289 hit:280 align:280 bit:426.4	OK	Chlorophyll a-b binding protein CP26, chloroplastic	LHCB5; LHCIIc; Light-harvesting complex II protein 5	CB5_ARATH	Q9XF89	Q8LAB1	LHCB5	na	Arabidopsis thaliana (Mouse-ear cress)	3702
High	Master Protein	GLYMA_20G017700	K02962 - small subunit ribosomal protein S17e (RP-S17e, RPS17) (1 of 3)	0	198.63	42	14	121	5	135	15.7	9.98	388.74	14	13	1.019	0.975648	65.5	99.5	100.5	62.12	57.34	High	High	High	High	High	High	1		3	3	Present Both	1	GLYMA_20G017700	GLYMA_20G017700	sp|Q9LZ17|RS174_ARATH	40S ribosomal protein S17-4 GN=RPS17D	ident:111/135 pos:119/135 query:135 hit:141 align:129 bit:223.8	OK	40S ribosomal protein S17-4	na	RS174_ARATH	Q9LZ17	Q8LAE8	RPS17D	na	Arabidopsis thaliana (Mouse-ear cress)	3702
High	Master Protein	GLYMA_05G114900	K03231 - elongation factor 1-alpha (EEF1A) (1 of 8)	0	198.006	31	14	95	2	447	49.2	9.07	325.2	14	4	0.745	0.740874	34.81	116.6	83.4	9.57	25.61	High	High	High	High	High	High	1		3	3	Present Both	1	GLYMA_05G114900	GLYMA_05G114900	sp|Q8GTY0|EF1A4_ARATH	Elongation factor 1-alpha 4 GN=A4	ident:433/447 pos:440/447 query:447 hit:449 align:446 bit:899.0	OK	Elongation factor 1-alpha 4 (EF-1-alpha 4)	eEF-1A4	EF1A4_ARATH	Q8GTY0	P13905; Q0WSD5; Q39093; Q9C5L4	A4	na	Arabidopsis thaliana (Mouse-ear cress)	3702
High	Master Protein	GLYMA_02G200300	K02962 - small subunit ribosomal protein S17e (RP-S17e, RPS17) (1 of 3)	0	194.545	49	14	115	5	140	15.9	10.23	349.44	14	0	1.072	0.963822	69.84	95.7	104.3	42.81	65.25	High	High	High	High	High	High	1		3	3	Present Both	1	GLYMA_02G200300	GLYMA_02G200300	sp|Q9LZ17|RS174_ARATH	40S ribosomal protein S17-4 GN=RPS17D	ident:117/140 pos:127/140 query:140 hit:141 align:141 bit:235.3	OK	40S ribosomal protein S17-4	na	RS174_ARATH	Q9LZ17	Q8LAE8	RPS17D	na	Arabidopsis thaliana (Mouse-ear cress)	3702
High	Master Protein	GLYMA_16G165500	K08912 - light-harvesting complex II chlorophyll a/b binding protein 1 (LHCB1) (1 of 5)	0	194.473	61	15	76	4	264	28	5.41	319.61	15	0	0.538	0.242706	11.32	143.4	56.6	52.43	44.96	High	High	High	High	High	High	1		3	3	Present Both	1	GLYMA_16G165500	GLYMA_16G165500	sp|P04778|CB1C_ARATH	Chlorophyll a-b binding protein 1, chloroplastic GN=LHCB1.3	ident:234/264 pos:249/264 query:264 hit:267 align:267 bit:470.3	OK	Chlorophyll a-b binding protein 1, chloroplastic	Chlorophyll a-b protein 140 (CAB-140); LHCII type I CAB-1	CB1C_ARATH	P04778	P83754	LHCB1.3	AB140; CAB1	Arabidopsis thaliana (Mouse-ear cress)	3702
High	Master Protein	GLYMA_08G135000	K02904 - large subunit ribosomal protein L29 (RP-L29, rpmC) (1 of 2)	0	194.062	57	16	81	6	161	18.4	10.37	277.07	16	0	0.65	0.562659	26.89	125.2	74.8	53.3	40.69	High	High	High	High	High	High	1		3	3	Present Both	1	GLYMA_08G135000	GLYMA_08G135000	sp|Q9FJP3|RK29_ARATH	50S ribosomal protein L29, chloroplastic GN=RPL29	ident:95/161 pos:117/161 query:161 hit:173 align:158 bit:170.6	OK	50S ribosomal protein L29, chloroplastic	CL29	RK29_ARATH	Q9FJP3	na	RPL29	na	Arabidopsis thaliana (Mouse-ear cress)	3702
High	Master Protein	GLYMA_12G043000	PF00076 - RNA recognition motif. (a.k.a. RRM, RBD, or RNP domain) (RRM_1) (1 of 477)	0	193.649	68	12	67	7	160	15.8	7.2	242.43	12	7	1.096	0.947586	59.62	76.6	123.4	42.05	30.55	High	High	High	High	High	High	1		3	3	Present Both	1	GLYMA_12G043000	GLYMA_12G043000	sp|Q03250|RBG7_ARATH	Glycine-rich RNA-binding protein 7 GN=RBG7	ident:68/160 pos:78/160 query:160 hit:176 align:85 bit:147.9	Partial_match_hit	Glycine-rich RNA-binding protein 7 (AtGR-RBP7)	AtRBG7; Glycine-rich protein 7 (AtGRP7); Protein COLD, CIRCADIAN RHYTHM, AND RNA BINDING 2 (Protein CCR2)	RBG7_ARATH	Q03250	C0Z304; Q8LEV4; Q94B62	RBG7	CCR2; GR-RBP7; GRP7	Arabidopsis thaliana (Mouse-ear cress)	3702
High	Master Protein	GLYMA_11G099300	PF16320 - Ribosomal protein L7/L12 dimerisation domain (Ribosomal_L12_N) (1 of 2)	0	190.646	56	16	89	4	233	24.8	7.65	349.03	16	11	1.284	0.740874	47.31	88.6	111.4	23.47	31.08	High	High	Not Found	High	High	High	1		2	3	Present Both	1	GLYMA_11G099300	GLYMA_11G099300	sp|P36210|RK121_ARATH	50S ribosomal protein L12-1, chloroplastic GN=RPL12A	ident:125/233 pos:151/233 query:233 hit:191 align:198 bit:193.7	OK	50S ribosomal protein L12-1, chloroplastic	CL12-A	RK121_ARATH	P36210	na	RPL12A	na	Arabidopsis thaliana (Mouse-ear cress)	3702
High	Master Protein	GLYMA_11G139400	K17777 - mitochondrial import inner membrane translocase subunit TIM9 (TIM9) (1 of 3)	0	189.905	62	9	124	9	93	10.8	7.21	468.02	9	0	0.952	0.993748	67.42	100.8	99.2	12.11	20.86	High	High	High	High	High	High	1	Acetyl [N-Term]	3	3	Present Both	1	GLYMA_11G139400	GLYMA_11G139400	sp|Q9XGX9|TIM9_ARATH	Mitochondrial import inner membrane translocase subunit TIM9 GN=TIM9	ident:75/93 pos:80/93 query:93 hit:93 align:93 bit:157.5	OK	Mitochondrial import inner membrane translocase subunit TIM9	Protein EMBRYO DEFECTIVE 2474	TIM9_ARATH	Q9XGX9	Q8L927; Q9SNC2	TIM9	EMB2474	Arabidopsis thaliana (Mouse-ear cress)	3702
High	Master Protein	GLYMA_13G334300	K11251 - histone H2A (H2A) (1 of 24)	0	189.572	65	12	71	10	149	15.7	10.67	312.63	12	2	1.378	0.647096	68.84	85.6	114.4	30.36	40.01	High	High	High	High	High	High	1	Acetyl [N-Term]	3	3	Present Both	1	GLYMA_13G334300	GLYMA_13G334300	sp|Q9LZ46|H2A4_ARATH	Probable histone H2A.4 GN=EZA1	ident:133/149 pos:143/149 query:149 hit:153 align:153 bit:242.3	OK	Probable histone H2A.4	HTA12	H2A4_ARATH	Q9LZ46	na	OrderedLocusNames=At5g02560	na	Arabidopsis thaliana (Mouse-ear cress)	3702
High	Master Protein	GLYMA_09G245700	K02147 - V-type H+-transporting ATPase subunit B (ATPeV1B, ATP6B) (1 of 4)	0	189.334	48	19	87	19	489	54.1	5.06	304.98	19	0	0.883	0.958607	40.17	112.6	87.4	35.73	24.65	High	High	High	High	High	High	1		3	3	Present Both	1	GLYMA_09G245700	GLYMA_09G245700	sp|Q9SZN1|VATB2_ARATH	V-type proton ATPase subunit B2 GN=VHA-B2	ident:470/489 pos:479/489 query:489 hit:487 align:489 bit:954.1	OK	V-type proton ATPase subunit B2 (V-ATPase subunit B2)	Vacuolar H(+)-ATPase subunit B isoform 2; Vacuolar proton pump subunit B2	VATB2_ARATH	Q9SZN1	B9DGU0; B9DHP3; Q56W88; Q94AY7	VHA-B2	na	Arabidopsis thaliana (Mouse-ear cress)	3702
High	Master Protein	GLYMA_06G290600	PTHR24089:SF340 - ADP,ATP CARRIER PROTEIN 3, MITOCHONDRIAL (1 of 2)	0	188.808	40	19	89	2	372	39.7	9.76	279.67	19	3	1.185	0.86345	44.21	74	126	42.25	43.41	High	High	High	High	High	High	1		3	3	Present Both	1	GLYMA_06G290600	GLYMA_06G290600	sp|O49447|ADT3_ARATH	ADP,ATP carrier protein 3, mitochondrial GN=AAC3	ident:314/372 pos:340/372 query:372 hit:379 align:378 bit:610.5	OK	ADP,ATP carrier protein 3, mitochondrial	ADP/ATP translocase 3; Adenine nucleotide translocator 3 (ANT 3)	ADT3_ARATH	O49447	Q8L9Y1	AAC3	ANT3	Arabidopsis thaliana (Mouse-ear cress)	3702
High	Master Protein	GLYMA_14G027900	PTHR18937//PTHR18937:SF242 - STRUCTURAL MAINTENANCE OF CHROMOSOMES SMC FAMILY MEMBER // SUBFAMILY NOT NAMED (1 of 2)	0	186.492	55	27	111	13	313	35	5.07	343.66	27	14	1.355	0.662951	52.53	72.5	127.5	18.85	21.73	High	High	High	High	High	High	1		3	3	Present Both	1	GLYMA_14G027900	GLYMA_14G027900	sp|Q9SHJ6|PMD2_ARATH	Peroxisomal and mitochondrial division factor 2 GN=PMD2	ident:109/313 pos:175/313 query:313 hit:323 align:264 bit:159.8	Poor_match	Peroxisomal and mitochondrial division factor 2	Ubiquitin-interacting factor 7	PMD2_ARATH	Q9SHJ6	A6XH03	PMD2	na	Arabidopsis thaliana (Mouse-ear cress)	3702
High	Master Protein	GLYMA_12G025400	PF16320 - Ribosomal protein L7/L12 dimerisation domain (Ribosomal_L12_N) (1 of 2)	0	184.21	63	15	84	3	190	20	5.68	327.38	15	0	3.8	0.028206	92.62	38	162	50.53	79.82	Peak Found	High	Not Found	High	High	High	1		2	3	Present Both	1	GLYMA_12G025400	GLYMA_12G025400	sp|P36212|RK123_ARATH	50S ribosomal protein L12-3, chloroplastic GN=RPL12C	ident:119/190 pos:144/190 query:190 hit:187 align:195 bit:193.0	OK	50S ribosomal protein L12-3, chloroplastic	CL12-C	RK123_ARATH	P36212	Q9LK92	RPL12C	na	Arabidopsis thaliana (Mouse-ear cress)	3702
High	Master Protein	GLYMA_06G043700	PTHR34362:SF1 - WPP DOMAIN-CONTAINING PROTEIN 1-RELATED (1 of 4)	0	183.48	57	10	73	5	161	16.5	4.45	285.73	10	0	1.221	0.820059	67.54	95.4	104.6	6.02	11.59	High	High	High	High	High	High	1		3	3	Present Both	1	GLYMA_06G043700	GLYMA_06G043700	sp|Q9C500|WPP2_ARATH	WPP domain-containing protein 2 GN=WPP2	ident:62/161 pos:87/161 query:161 hit:180 align:104 bit:139.0	Poor_match	WPP domain-containing protein 2	MFP1 attachment factor 2	WPP2_ARATH	Q9C500	Q8LE13	WPP2	MAF2	Arabidopsis thaliana (Mouse-ear cress)	3702
High	Master Protein	GLYMA_17G079700		0	181.8	68	10	78	10	126	14.4	9.35	330.33	10	0	1.996	0.110872	64.38	70.6	129.4	6.46	11.67	High	High	High	High	High	High	1		3	3	Present Both	1	GLYMA_17G079700	GLYMA_17G079700	sp|Q9C7I1|ATL34_ARATH	RING-H2 finger protein ATL34 GN=ATL34	ident:19/126 pos:31/126 query:126 hit:327 align:71 bit:28.9	Partial_match_hit	RING-H2 finger protein ATL34	RING-type E3 ubiquitin transferase ATL34	ATL34_ARATH	Q9C7I1	na	ATL34	na	Arabidopsis thaliana (Mouse-ear cress)	3702
High	Master Protein	GLYMA_11G214800	K03934 - NADH dehydrogenase (ubiquinone) Fe-S protein 1 (NDUFS1) (1 of 2)	0	181.739	40	19	58	6	747	81.3	6.7	199.5	19	11	0.697	0.655258	39.13	133.5	66.5	49.22	45	High	High	High	High	High	High	1		3	3	Present Both	1	GLYMA_11G214800	GLYMA_11G214800	sp|Q9FGI6|NDUS1_ARATH	NADH dehydrogenase [ubiquinone] iron-sulfur protein 1, mitochondrial GN=EMB1467	ident:604/747 pos:671/747 query:747 hit:748 align:747 bit:1248.8	OK	NADH dehydrogenase [ubiquinone] iron-sulfur protein 1, mitochondrial	Protein EMBRYO DEFECTIVE 1467	NDUS1_ARATH	Q9FGI6	Q940B1	EMB1467	na	Arabidopsis thaliana (Mouse-ear cress)	3702
High	Master Protein	GLYMA_05G026200	1.3.1.83 - Geranylgeranyl diphosphate reductase / Geranylgeranyl reductase (1 of 3)	0	181.72	39	19	85	19	462	51.3	9.03	266.39	19	0	1.097	0.947586	55.85	107.2	92.8	25.69	13.8	High	High	High	High	High	High	1		3	3	Present Both	1	GLYMA_05G026200	GLYMA_05G026200	sp|Q9CA67|CHLP_ARATH	Geranylgeranyl diphosphate reductase, chloroplastic GN=CHLP	ident:379/462 pos:420/462 query:462 hit:467 align:465 bit:769.6	OK	Geranylgeranyl diphosphate reductase, chloroplastic	Geranylgeranyl reductase	CHLP_ARATH	Q9CA67	B9DHM2; O49594; Q56YY5; Q8H170	CHLP	na	Arabidopsis thaliana (Mouse-ear cress)	3702
High	Master Protein	GLYMA_13G267900	3.4.19.9 - Gamma-glutamyl hydrolase / Pteroyl-poly-alpha-glutamate hydrolase (1 of 3)	0	181.48	57	13	75	13	175	19.9	8.88	291.26	13	0	1.387	0.639803	49.25	80.9	119.1	22.48	12.65	High	High	High	High	High	High	1		3	3	Present Both	1	GLYMA_13G267900	GLYMA_13G267900	sp|Q9SYL6|GGH1_ARATH	Gamma-glutamyl hydrolase 1 GN=GGH1	ident:97/175 pos:121/175 query:175 hit:348 align:172 bit:205.7	Partial_match_hit	Gamma-glutamyl hydrolase 1 (AtGGH1)	Conjugase; GH; Gamma-Glu-X carboxypeptidase	GGH1_ARATH	Q9SYL6	Q29Q19; Q93Z97	GGH1	na	Arabidopsis thaliana (Mouse-ear cress)	3702
High	Master Protein	GLYMA_06G011000	K02975 - small subunit ribosomal protein S25e (RP-S25e, RPS25) (1 of 4)	0	180.537	54	14	82	4	107	11.9	10.56	280.98	14	0	1.425	0.596219	56.47	84.3	115.7	42.28	33.74	High	High	High	High	High	High	1		3	3	Present Both	1	GLYMA_06G011000	GLYMA_06G011000	sp|Q9T029|RS254_ARATH	40S ribosomal protein S25-4 GN=RPS25E	ident:94/107 pos:101/107 query:107 hit:108 align:108 bit:161.8	OK	40S ribosomal protein S25-4	na	RS254_ARATH	Q9T029	na	RPS25E	na	Arabidopsis thaliana (Mouse-ear cress)	3702
High	Master Protein	GLYMA_07G200200	PTHR11527:SF158 - 17.6 KDA CLASS I HEAT SHOCK PROTEIN 1-RELATED (1 of 20)	0	180.181	66	14	65	4	161	18.5	6.37	253.59	14	11	1.575	0.439578	53.15	61.3	138.7	41.11	46.99	High	High	Not Found	High	High	High	1		2	3	Present Both	1	GLYMA_07G200200	GLYMA_07G200200	sp|Q9LNW0|HS178_ARATH	17.8 kDa class I heat shock protein GN=HSP17.8	ident:115/161 pos:134/161 query:161 hit:157 align:165 bit:225.7	OK	17.8 kDa class I heat shock protein	17.8 kDa heat shock protein (AtHsp17.8)	HS178_ARATH	Q9LNW0	na	HSP17.8	na	Arabidopsis thaliana (Mouse-ear cress)	3702
High	Master Protein	GLYMA_18G036400	KOG0651 - 26S proteasome regulatory complex, ATPase RPT4 (1 of 9)	0	179.988	42	19	79	4	443	48.6	7.24	274.41	19	0	0.612	0.454856	17.74	111.1	88.9	43.4	80.27	High	High	High	High	High	High	1		3	3	Present Both	1	GLYMA_18G036400	GLYMA_18G036400	sp|P10896|RCA_ARATH	Ribulose bisphosphate carboxylase/oxygenase activase, chloroplastic GN=RCA	ident:359/443 pos:394/443 query:443 hit:474 align:444 bit:734.2	OK	Ribulose bisphosphate carboxylase/oxygenase activase, chloroplastic (RA; RuBisCO activase)	na	RCA_ARATH	P10896	Q39197; Q39198; Q8H172; Q940T8; Q941B7	RCA	na	Arabidopsis thaliana (Mouse-ear cress)	3702
High	Master Protein	GLYMA_11G201500	PF10674 - Protein of unknown function (DUF2488) (Ycf54) (1 of 2)	0	179.306	44	11	69	3	234	26.7	6.8	238.56	11	0	1.627	0.491013	42.84	74.1	125.9	10.45	29.8	High	High	High	High	Peak Found	High	1		3	3	Present Both	1	GLYMA_11G201500	GLYMA_11G201500	sp|Q9SVL0|ZHD7_ARATH	Zinc-finger homeodomain protein 7 GN=ZHD7	ident:14/234 pos:20/234 query:234 hit:249 align:38 bit:31.6	Partial_match_both	Zinc-finger homeodomain protein 7 (AtZHD7)	Homeobox protein 28 (AtHB-28)	ZHD7_ARATH	Q9SVL0	Q8LDG1	ZHD7	HB28	Arabidopsis thaliana (Mouse-ear cress)	3702
High	Master Protein	GLYMA_18G156500	K17732 - mitochondrial-processing peptidase subunit beta [EC:3.4.24.64] (PMPCB, MAS1) (1 of 3)	0	178.483	51	23	82	4	527	58.8	6.99	252.07	23	0	0.699	0.657549	21.3	122.7	77.3	50.36	32.86	High	High	High	High	High	High	1		3	3	Present Both	1	GLYMA_18G156500	GLYMA_18G156500	sp|Q42290|MPPB_ARATH	Probable mitochondrial-processing peptidase subunit beta, mitochondrial GN=MORF8	ident:414/527 pos:470/527 query:527 hit:531 align:531 bit:870.9	OK	Probable mitochondrial-processing peptidase subunit beta, mitochondrial	Beta-MPP	MPPB_ARATH	Q42290	Q0WWT6; Q9SGA7	OrderedLocusNames=At3g02090	na	Arabidopsis thaliana (Mouse-ear cress)	3702
High	Master Protein	GLYMA_07G006900	K15718 - linoleate 9S-lipoxygenase (LOX1_5) (1 of 21)	0	177.776	22	23	86	15	859	96.3	6.7	232.5	23	6	0.777	0.816609	36.73	109.4	90.6	18.95	12.85	High	High	High	High	High	High	1		3	3	Present Both	1	GLYMA_07G006900	GLYMA_07G006900	sp|Q06327|LOX1_ARATH	Linoleate 9S-lipoxygenase 1 GN=LOX1	ident:488/859 pos:630/859 query:859 hit:859 align:879 bit:981.1	OK	Linoleate 9S-lipoxygenase 1	Lipoxygenase 1 (AtLOX1)	LOX1_ARATH	Q06327	Q9FZ30	LOX1	na	Arabidopsis thaliana (Mouse-ear cress)	3702
High	Master Protein	GLYMA_11G182300		0	177.002	67	8	79	3	115	12.3	9.61	383.61	8	5	1.364	0.655258	77.5	93.7	106.3	27.7	3.82	High	High	High	High	High	High	1		3	3	Present Both	1	GLYMA_11G182300	GLYMA_11G182300	sp|Q9ZUX4|UMP2_ARATH	Uncharacterized protein At2g27730, mitochondrial GN=UKL2	ident:67/115 pos:82/115 query:115 hit:113 align:119 bit:92.4	OK	Uncharacterized protein At2g27730, mitochondrial	na	UMP2_ARATH	Q9ZUX4	Q8LBD1	OrderedLocusNames=At2g27730	na	Arabidopsis thaliana (Mouse-ear cress)	3702
High	Master Protein	GLYMA_05G079100	PTHR32409:SF3 - MITOCHONDRIAL IMPORT RECEPTOR SUBUNIT TOM20-1-RELATED (1 of 4)	0	176.946	35	8	66	8	210	23.4	5.82	318.45	8	0	0.999	0.993748	57.13	100.6	99.4	13.61	7.38	High	High	High	High	High	High	1	Acetyl [N-Term]	3	3	Present Both	1	GLYMA_05G079100	GLYMA_05G079100	sp|P82873|TO202_ARATH	Mitochondrial import receptor subunit TOM20-2 GN=TOM20-2	ident:113/210 pos:153/210 query:210 hit:210 align:208 bit:245.7	OK	Mitochondrial import receptor subunit TOM20-2	Translocase of outer membrane 20 kDa subunit 2	TO202_ARATH	P82873	Q2HIH9; Q9FZJ6	TOM20-2	na	Arabidopsis thaliana (Mouse-ear cress)	3702
High	Master Protein	GLYMA_05G008100	PTHR19370:SF90 - NADH-CYTOCHROME B5 REDUCTASE 2 (1 of 2)	0	176.733	54	18	58	3	323	35.6	9.01	160.16	18	13	1.815	0.204789	112.93	80	120	120.83	126.11	High	High	High	High	High	High	1		3	3	Present Both	1	GLYMA_05G008100	GLYMA_05G008100	sp|P83291|NB5R2_ARATH	NADH-cytochrome b5 reductase-like protein GN=CBR2	ident:235/323 pos:273/323 query:323 hit:328 align:325 bit:499.2	OK	NADH-cytochrome b5 reductase-like protein (B5R)	na	NB5R2_ARATH	P83291	Q8LBD3	CBR2	na	Arabidopsis thaliana (Mouse-ear cress)	3702
High	Master Protein	GLYMA_07G089600	K09313 - homeobox protein cut-like (CUTL) (1 of 2)	0	175.317	26	20	53	4	690	79.5	5.34	182.48	20	14	1.327	0.712101	52.56	82.5	117.5	17.65	19.09	High	High	Not Found	High	High	Peak Found	1	Acetyl [N-Term]	2	3	Present Both	1	GLYMA_07G089600	GLYMA_07G089600	sp|Q9LS42|CASP_ARATH	Protein CASP GN=CASP	ident:560/690 pos:622/690 query:690 hit:689 align:694 bit:1115.9	OK	Protein CASP	na	CASP_ARATH	Q9LS42	Q93ZW7	CASP	na	Arabidopsis thaliana (Mouse-ear cress)	3702
High	Master Protein	GLYMA_20G108500	K03963 - NADH dehydrogenase (ubiquinone) 1 beta subcomplex subunit 7 (NDUFB7) (1 of 1)	0	175.046	60	11	152	11	98	11.6	8.18	465.24	11	0	1.097	0.947586	92.52	103.5	96.5	13.28	32.52	High	High	High	High	High	High	1	Acetyl [N-Term]	3	3	Present Both	1	GLYMA_20G108500	GLYMA_20G108500	sp|Q9SKC9|NDUB7_ARATH	NADH dehydrogenase [ubiquinone] 1 beta subcomplex subunit 7 GN=OFUT9	ident:75/98 pos:82/98 query:98 hit:103 align:105 bit:144.4	OK	NADH dehydrogenase [ubiquinone] 1 beta subcomplex subunit 7	na	NDUB7_ARATH	Q9SKC9	Q42155; Q42220; Q8GXZ6	OrderedLocusNames=At2g02050	na	Arabidopsis thaliana (Mouse-ear cress)	3702
High	Master Protein	GLYMA_08G185800	PF04755 - PAP_fibrillin (PAP_fibrillin) (1 of 23)	0	174.853	67	16	76	5	242	27.2	9.42	261.1	16	9	0.876	0.953681	29.59	101.5	98.5	32.69	34.51	High	High	High	High	High	High	1		3	3	Present Both	1	GLYMA_08G185800	GLYMA_08G185800	sp|Q9LU85|PAP4_ARATH	Probable plastid-lipid-associated protein 4, chloroplastic GN=PAP4	ident:127/242 pos:154/242 query:242 hit:242 align:187 bit:268.9	OK	Probable plastid-lipid-associated protein 4, chloroplastic	Fibrillin-3a; Plastoglobulin 25 (AtPGL25)	PAP4_ARATH	Q9LU85	Q8W4A9	PAP4	FBN3a; FIB3a; PGL25	Arabidopsis thaliana (Mouse-ear cress)	3702
High	Master Protein	GLYMA_16G165200	K08912 - light-harvesting complex II chlorophyll a/b binding protein 1 (LHCB1) (1 of 5)	0	173.874	61	15	72	4	264	28	5.41	304.33	15	0	0.441	0.0579108	9.11	140	60	75.53	44.51	High	High	High	High	High	High	1		3	3	Present Both	1	GLYMA_16G165200	GLYMA_16G165200	sp|P04778|CB1C_ARATH	Chlorophyll a-b binding protein 1, chloroplastic GN=LHCB1.3	ident:233/264 pos:249/264 query:264 hit:267 align:267 bit:469.5	OK	Chlorophyll a-b binding protein 1, chloroplastic	Chlorophyll a-b protein 140 (CAB-140); LHCII type I CAB-1	CB1C_ARATH	P04778	P83754	LHCB1.3	AB140; CAB1	Arabidopsis thaliana (Mouse-ear cress)	3702
High	Master Protein	GLYMA_12G205400	K05863 - solute carrier family 25 (mitochondrial adenine nucleotide translocator), member 4/5/6/31 (SLC25A4S, ANT) (1 of 12)	0	172.829	34	17	75	1	367	39.4	9.79	234.43	17	0	1.038	0.974214	48.12	73	127	45.7	38.88	High	High	High	High	High	High	1		3	3	Present Both	1	GLYMA_12G205400	GLYMA_12G205400	sp|O49447|ADT3_ARATH	ADP,ATP carrier protein 3, mitochondrial GN=AAC3	ident:309/367 pos:334/367 query:367 hit:379 align:376 bit:597.4	OK	ADP,ATP carrier protein 3, mitochondrial	ADP/ATP translocase 3; Adenine nucleotide translocator 3 (ANT 3)	ADT3_ARATH	O49447	Q8L9Y1	AAC3	ANT3	Arabidopsis thaliana (Mouse-ear cress)	3702
High	Master Protein	GLYMA_19G172500	K11254 - histone H4 (H4) (1 of 20)	0	172.779	42	16	102	16	156	17.9	11.36	352.98	16	0	0.864	0.944471	46.12	89.8	110.2	14.1	33.84	High	High	High	High	High	High	1		3	3	Present Both	1	GLYMA_19G172500	GLYMA_19G172500	sp|P59259|H4_ARATH	Histone H4 GN=GXM1	ident:103/156 pos:103/156 query:156 hit:103 align:103 bit:203.4	OK	Histone H4	na	H4_ARATH	P59259	P02308	OrderedLocusNames=At1g07660	na	Arabidopsis thaliana (Mouse-ear cress)	3702
High	Master Protein	GLYMA_16G087200	K17732 - mitochondrial-processing peptidase subunit beta [EC:3.4.24.64] (PMPCB, MAS1) (1 of 3)	0	172.62	35	18	68	7	523	58.5	6.73	218.87	18	0	1.034	0.974214	59.71	28.7	171.3	146.03	78.41	High	High	High	High	High	High	1		3	3	Present Both	1	GLYMA_16G087200	GLYMA_16G087200	sp|Q42290|MPPB_ARATH	Probable mitochondrial-processing peptidase subunit beta, mitochondrial GN=MORF8	ident:409/523 pos:467/523 query:523 hit:531 align:531 bit:852.4	OK	Probable mitochondrial-processing peptidase subunit beta, mitochondrial	Beta-MPP	MPPB_ARATH	Q42290	Q0WWT6; Q9SGA7	OrderedLocusNames=At3g02090	na	Arabidopsis thaliana (Mouse-ear cress)	3702
High	Master Protein	GLYMA_17G116400	PTHR19370:SF90 - NADH-CYTOCHROME B5 REDUCTASE 2 (1 of 2)	0	169.508	55	17	54	2	319	35.1	8.56	176.3	17	0	1.208	0.852529	37.52	95.2	104.8	35.01	20.45	High	High	High	High	Peak Found	High	1		3	3	Present Both	1	GLYMA_17G116400	GLYMA_17G116400	sp|P83291|NB5R2_ARATH	NADH-cytochrome b5 reductase-like protein GN=CBR2	ident:230/319 pos:267/319 query:319 hit:328 align:325 bit:485.3	OK	NADH-cytochrome b5 reductase-like protein (B5R)	na	NB5R2_ARATH	P83291	Q8LBD3	CBR2	na	Arabidopsis thaliana (Mouse-ear cress)	3702
High	Master Protein	GLYMA_15G253700	K03541 - photosystem II 10kDa protein (psbR) (1 of 2)	0	169.25	36	9	95	2	138	14.3	9.7	344.13	9	0	0.649	0.561678	10.55	126.2	73.8	13.43	19.01	High	High	High	High	High	High	1		3	3	Present Both	1	GLYMA_15G253700	GLYMA_15G253700	sp|P27202|PSBR_ARATH	Photosystem II 10 kDa polypeptide, chloroplastic GN=PSBR	ident:107/138 pos:121/138 query:138 hit:140 align:140 bit:209.1	OK	Photosystem II 10 kDa polypeptide, chloroplastic	na	PSBR_ARATH	P27202	na	PSBR	ART1	Arabidopsis thaliana (Mouse-ear cress)	3702
High	Master Protein	GLYMA_18G286500	PTHR31407:SF4 - PSBP-LIKE PROTEIN 1, CHLOROPLASTIC (1 of 2)	0	169.185	59	23	73	4	236	26.8	9.45	238.14	23	18	1.101	0.944471	56.99	90.9	109.1	37.25	24.14	High	Peak Found	High	High	Peak Found	High	1		3	3	Present Both	1	GLYMA_18G286500	GLYMA_18G286500	sp|P82538|PPL1_ARATH	PsbP-like protein 1, chloroplastic GN=PPL1	ident:135/236 pos:167/236 query:236 hit:230 align:207 bit:284.6	OK	PsbP-like protein 1, chloroplastic	OEC23-like protein 4; PsbP-related thylakoid lumenal protein 2	PPL1_ARATH	P82538	na	PPL1	na	Arabidopsis thaliana (Mouse-ear cress)	3702
High	Master Protein	GLYMA_15G022700	K02903 - large subunit ribosomal protein L28e (RP-L28e, RPL28) (1 of 4)	0	168.836	60	16	79	2	150	16.9	11.05	300.36	16	10	0.907	0.971508	47.76	98.1	101.9	43.98	47.22	High	High	High	Peak Found	Peak Found	High	1		3	3	Present Both	1	GLYMA_15G022700	GLYMA_15G022700	sp|Q9M0E2|RL282_ARATH	60S ribosomal protein L28-2 GN=RPL28C	ident:105/150 pos:125/150 query:150 hit:143 align:143 bit:223.4	OK	60S ribosomal protein L28-2	na	RL282_ARATH	Q9M0E2	na	RPL28C	na	Arabidopsis thaliana (Mouse-ear cress)	3702
High	Master Protein	GLYMA_02G287000	PTHR18937//PTHR18937:SF242 - STRUCTURAL MAINTENANCE OF CHROMOSOMES SMC FAMILY MEMBER // SUBFAMILY NOT NAMED (1 of 2)	0	168.734	53	23	96	9	313	34.9	5.1	266.99	23	0	1.149	0.906801	41.86	99.9	100.1	56.85	35.45	High	High	High	High	Peak Found	High	1		3	3	Present Both	1	GLYMA_02G287000	GLYMA_02G287000	sp|Q9SHJ6|PMD2_ARATH	Peroxisomal and mitochondrial division factor 2 GN=PMD2	ident:107/313 pos:172/313 query:313 hit:323 align:264 bit:159.8	Poor_match	Peroxisomal and mitochondrial division factor 2	Ubiquitin-interacting factor 7	PMD2_ARATH	Q9SHJ6	A6XH03	PMD2	na	Arabidopsis thaliana (Mouse-ear cress)	3702
High	Master Protein	GLYMA_01G010600		0	166.656	71	10	84	10	138	15.9	9.55	289.12	10	0	1.063	0.963822	41.3	89.8	110.2	7.06	11.02	High	High	High	High	High	High	1		3	3	Present Both	1	GLYMA_01G010600	GLYMA_01G010600	sp|Q9SSE8|GLYT1_ARATH	Probable glycosyltransferase At3g07620 GN=GLU2	ident:10/138 pos:25/138 query:138 hit:470 align:47 bit:28.9	Partial_match_both	Probable glycosyltransferase At3g07620	na	GLYT1_ARATH	Q9SSE8	na	OrderedLocusNames=At3g07620	na	Arabidopsis thaliana (Mouse-ear cress)	3702
High	Master Protein	GLYMA_04G043200	PTHR34362:SF1 - WPP DOMAIN-CONTAINING PROTEIN 1-RELATED (1 of 4)	0	164.981	57	10	66	5	161	16.5	4.45	266.47	10	5	1.102	0.944471	58.17	97.1	102.9	6.24	7.09	High	High	High	High	High	High	1		3	3	Present Both	1	GLYMA_04G043200	GLYMA_04G043200	sp|Q9C500|WPP2_ARATH	WPP domain-containing protein 2 GN=WPP2	ident:60/161 pos:86/161 query:161 hit:180 align:99 bit:140.6	Poor_match	WPP domain-containing protein 2	MFP1 attachment factor 2	WPP2_ARATH	Q9C500	Q8LE13	WPP2	MAF2	Arabidopsis thaliana (Mouse-ear cress)	3702
High	Master Protein	GLYMA_19G205100	K02979 - small subunit ribosomal protein S28e (RP-S28e, RPS28) (1 of 5)	0	164.844	95	14	114	14	65	7.5	11.17	363.36	14	0	0.909	0.97325	55.38	109.3	90.7	31.99	37.27	High	High	High	High	High	High	1	Acetyl [N-Term]	3	3	Present Both	1	GLYMA_19G205100	GLYMA_19G205100	sp|Q9SR73|RS281_ARATH	40S ribosomal protein S28-1 GN=RPS28B	ident:57/65 pos:62/65 query:65 hit:64 align:65 bit:112.8	OK	40S ribosomal protein S28-1	na	RS281_ARATH	Q9SR73	na	RPS28A	na	Arabidopsis thaliana (Mouse-ear cress)	3702
High	Master Protein	GLYMA_12G224800	PTHR32219:SF2 - PROTON PUMP-INTERACTOR 1-RELATED (1 of 3)	0	163.745	35	23	83	23	622	70.1	9.11	233.59	23	0	1.159	0.897464	53.42	92.7	107.3	21.69	32.06	High	High	High	High	High	High	1		3	3	Present Both	1	GLYMA_12G224800	GLYMA_12G224800	sp|O23144|PPI1_ARATH	Proton pump-interactor 1 GN=PPI1	ident:272/622 pos:360/622 query:622 hit:612 align:512 bit:476.1	Poor_match	Proton pump-interactor 1	na	PPI1_ARATH	O23144	B9DFB6; Q9SZS5	PPI1	na	Arabidopsis thaliana (Mouse-ear cress)	3702
High	Master Protein	GLYMA_02G094900	PTHR31407:SF4 - PSBP-LIKE PROTEIN 1, CHLOROPLASTIC (1 of 2)	0	161.737	54	20	67	1	248	28	9.28	231.48	20	0	1.034	0.978501	16.33	98.3	101.7	8.57	34.19	High	High	High	Peak Found	High	High	1		3	3	Present Both	1	GLYMA_02G094900	GLYMA_02G094900	sp|P82538|PPL1_ARATH	PsbP-like protein 1, chloroplastic GN=PPL1	ident:135/248 pos:164/248 query:248 hit:230 align:207 bit:280.4	OK	PsbP-like protein 1, chloroplastic	OEC23-like protein 4; PsbP-related thylakoid lumenal protein 2	PPL1_ARATH	P82538	na	PPL1	na	Arabidopsis thaliana (Mouse-ear cress)	3702
High	Master Protein	GLYMA_13G295500	K05863 - solute carrier family 25 (mitochondrial adenine nucleotide translocator), member 4/5/6/31 (SLC25A4S, ANT) (1 of 12)	0	160.802	37	18	74	3	367	39.6	9.85	207.83	18	0	2.309	0.0692033	49.67	67.1	132.9	36.07	38.47	High	High	High	High	High	High	1		3	3	Present Both	1	GLYMA_13G295500	GLYMA_13G295500	sp|O49447|ADT3_ARATH	ADP,ATP carrier protein 3, mitochondrial GN=AAC3	ident:311/367 pos:337/367 query:367 hit:379 align:376 bit:603.6	OK	ADP,ATP carrier protein 3, mitochondrial	ADP/ATP translocase 3; Adenine nucleotide translocator 3 (ANT 3)	ADT3_ARATH	O49447	Q8L9Y1	AAC3	ANT3	Arabidopsis thaliana (Mouse-ear cress)	3702
High	Master Protein	GLYMA_15G261900	PTHR11406:SF8 - PHOSPHOGLYCERATE KINASE 1, CHLOROPLASTIC-RELATED (1 of 2)	0	158.65	51	18	60	5	483	50	8.15	196.85	18	10	0.728	0.727639	32.85	118.9	81.1	51.47	49.97	High	High	High	High	High	High	1		3	3	Present Both	1	GLYMA_15G261900	GLYMA_15G261900	sp|Q9LD57|PGKH1_ARATH	Phosphoglycerate kinase 1, chloroplastic GN=PGK1	ident:400/483 pos:441/483 query:483 hit:481 align:486 bit:771.5	OK	Phosphoglycerate kinase 1, chloroplastic	na	PGKH1_ARATH	Q9LD57	na	PGK1	na	Arabidopsis thaliana (Mouse-ear cress)	3702
High	Master Protein	GLYMA_09G187100	K09313 - homeobox protein cut-like (CUTL) (1 of 2)	0	157.255	23	19	47	3	692	79.8	5.34	152.88	19	0	1.265	0.906801	6.45	128.7	71.3	7.92		High	High	Not Found	High	Not Found	Not Found	1		2	1	Only Control	1	GLYMA_09G187100	GLYMA_09G187100	sp|Q9LS42|CASP_ARATH	Protein CASP GN=CASP	ident:554/692 pos:615/692 query:692 hit:689 align:687 bit:1106.3	OK	Protein CASP	na	CASP_ARATH	Q9LS42	Q93ZW7	CASP	na	Arabidopsis thaliana (Mouse-ear cress)	3702
High	Master Protein	GLYMA_08G031800	K01412 - mitochondrial-processing peptidase subunit alpha [EC:3.4.24.64] (PMPCA, MAS2) (1 of 6)	0	156.087	26	11	51	5	509	54.8	5.77	211.73	11	6	0.633	0.509673	17.4	123.9	76.1	66.64	18.78	High	High	Not Found	High	High	High	1		2	3	Present Both	1	GLYMA_08G031800	GLYMA_08G031800	sp|Q9ZU25|MPPA1_ARATH	Probable mitochondrial-processing peptidase subunit alpha-1, mitochondrial GN=MORF9	ident:329/509 pos:393/509 query:509 hit:503 align:508 bit:632.5	OK	Probable mitochondrial-processing peptidase subunit alpha-1, mitochondrial	Alpha-MPP 1	MPPA1_ARATH	Q9ZU25	Q0WW81; Q8L9K3	OrderedLocusNames=At1g51980	na	Arabidopsis thaliana (Mouse-ear cress)	3702
High	Master Protein	GLYMA_13G352100	K02903 - large subunit ribosomal protein L28e (RP-L28e, RPL28) (1 of 4)	0	156.055	55	14	81	1	150	16.9	11.17	310.98	14	0	0.621	0.480277	32.44	123.4	76.6	37.13	65.93	High	High	High	High	High	High	1		3	3	Present Both	1	GLYMA_13G352100	GLYMA_13G352100	sp|Q9M0E2|RL282_ARATH	60S ribosomal protein L28-2 GN=RPL28C	ident:103/150 pos:125/150 query:150 hit:143 align:143 bit:220.7	OK	60S ribosomal protein L28-2	na	RL282_ARATH	Q9M0E2	na	RPL28C	na	Arabidopsis thaliana (Mouse-ear cress)	3702
High	Master Protein	GLYMA_16G043100	PF14200 - Ricin-type beta-trefoil lectin domain-like (RicinB_lectin_2) (1 of 3)	0	153.132	44	9	59	2	263	29.5	6.92	228.34	9	0	1.519	0.740874	15.32	79.4	120.6	15.71	11.08	High	Peak Found	Not Found	High	Not Found	Peak Found	1		2	2	Present Both	1	GLYMA_16G043100	GLYMA_16G043100	sp|Q945P1|EULS3_ARATH	Ricin B-like lectin EULS3 GN=EULS3	ident:145/263 pos:179/263 query:263 hit:317 align:259 bit:258.1	OK	Ricin B-like lectin EULS3	Euonymus lectin S3 (AtEULS3)	EULS3_ARATH	Q945P1	Q9ZV03	EULS3	na	Arabidopsis thaliana (Mouse-ear cress)	3702
High	Master Protein	GLYMA_12G065100	K11252 - histone H2B (H2B) (1 of 16)	0	152.611	62	12	80	2	149	16.3	10.08	300.29	12	12	1.483	0.529188	69.44	76.8	123.2	29.57	33	High	High	High	High	High	High	1		3	3	Present Both	1	GLYMA_12G065100	GLYMA_12G065100	sp|O23629|H2B6_ARATH	Histone H2B.6 GN=H2B	ident:132/149 pos:138/149 query:149 hit:150 align:152 bit:238.8	OK	Histone H2B.6	H2BAt; HTB9	H2B6_ARATH	O23629	na	H2B	na	Arabidopsis thaliana (Mouse-ear cress)	3702
High	Master Protein	GLYMA_03G110100	K02926 - large subunit ribosomal protein L4 (RP-L4, MRPL4, rplD) (1 of 6)	0	152.542	42	16	62	4	310	33.8	7.06	212.27	16	13	0.786	0.836536	45.62	105.3	94.7	73.71	71.35	High	High	High	High	High	High	1		3	3	Present Both	1	GLYMA_03G110100	GLYMA_03G110100	sp|O50061|RK4_ARATH	50S ribosomal protein L4, chloroplastic GN=RPL4	ident:166/310 pos:196/310 query:310 hit:282 align:224 bit:322.0	OK	50S ribosomal protein L4, chloroplastic	CL4; R-protein L4	RK4_ARATH	O50061	Q8LF27; Q8VZS1; Q9LNV1	RPL4	na	Arabidopsis thaliana (Mouse-ear cress)	3702
High	Master Protein	GLYMA_11G151300	K02899 - large subunit ribosomal protein L27 (RP-L27, MRPL27, rpmA) (1 of 4)	0	152.077	36	10	55	4	194	21.1	10.23	212.63	10	5	1.062	0.963822	68.49	130.3	69.7	13.62	23.95	High	High	High	High	High	High	1		3	3	Present Both	1	GLYMA_11G151300	GLYMA_11G151300	sp|Q9FLN4|RK27_ARATH	50S ribosomal protein L27, chloroplastic GN=RPL27	ident:136/194 pos:155/194 query:194 hit:198 align:203 bit:239.6	OK	50S ribosomal protein L27, chloroplastic	CL27	RK27_ARATH	Q9FLN4	na	RPL27	na	Arabidopsis thaliana (Mouse-ear cress)	3702
High	Master Protein	GLYMA_14G201500	PF16940 - Chloroplast envelope transporter (Tic110) (1 of 4)	0	151.805	20	15	59	6	996	109.8	6.19	237.19	15	0	0.968	0.999087	72.84	116	84	26.22	53.9	High	High	High	High	Peak Found	High	1		3	3	Present Both	1	GLYMA_14G201500	GLYMA_14G201500	sp|Q8LPR9|TI110_ARATH	Protein TIC110, chloroplastic GN=TIC110	ident:697/996 pos:841/996 query:996 hit:1016 align:1004 bit:1397.9	OK	Protein TIC110, chloroplastic	Translocon at the inner envelope membrane of chloroplasts 110 (AtTIC110)	TI110_ARATH	Q8LPR9	Q0WMF8; Q8LPG5; Q9LMI9; Q9M9Z7	TIC110	na	Arabidopsis thaliana (Mouse-ear cress)	3702
High	Master Protein	GLYMA_16G026200	K17525 - chitinase domain-containing protein 1 (CHID1) (1 of 4)	0	151.206	36	18	60	8	455	47.5	5.58	180.75	18	8	0.727	0.727639	20.5	125.2	74.8	29.11	7.24	High	High	High	High	High	High	1		3	3	Present Both	1	GLYMA_16G026200	GLYMA_16G026200	sp|Q9M158|STR4_ARATH	Rhodanese-like domain-containing protein 4, chloroplastic GN=STR4	ident:263/455 pos:324/455 query:455 hit:466 align:469 bit:443.0	OK	Rhodanese-like domain-containing protein 4, chloroplastic	Protein THYLAKOID RHODANESE-LIKE; Sulfurtransferase 4 (AtStr4)	STR4_ARATH	Q9M158	O04623; Q0WWP1; Q93VZ2	STR4	na	Arabidopsis thaliana (Mouse-ear cress)	3702
High	Master Protein	GLYMA_10G177200	K08916 - light-harvesting complex II chlorophyll a/b binding protein 5 (LHCB5) (1 of 4)	0	151.194	40	14	55	7	287	30.8	6.8	192.29	14	0	0.862	0.944288	52.88	100.5	99.5	50.58	9.02	High	High	High	High	Peak Found	High	1		3	3	Present Both	1	GLYMA_10G177200	GLYMA_10G177200	sp|Q9XF89|CB5_ARATH	Chlorophyll a-b binding protein CP26, chloroplastic GN=LHCB5	ident:236/287 pos:252/287 query:287 hit:280 align:288 bit:426.0	OK	Chlorophyll a-b binding protein CP26, chloroplastic	LHCB5; LHCIIc; Light-harvesting complex II protein 5	CB5_ARATH	Q9XF89	Q8LAB1	LHCB5	na	Arabidopsis thaliana (Mouse-ear cress)	3702
High	Master Protein	GLYMA_12G090500		0	150.984	67	8	69	3	115	12.2	9.61	339.91	8	0	1.975	0.121183	85.87	77.5	122.5	38.41	78.19	High	High	High	High	High	High	1		3	3	Present Both	1	GLYMA_12G090500	GLYMA_12G090500	sp|Q9ZUX4|UMP2_ARATH	Uncharacterized protein At2g27730, mitochondrial GN=UKL2	ident:63/115 pos:80/115 query:115 hit:113 align:116 bit:91.3	OK	Uncharacterized protein At2g27730, mitochondrial	na	UMP2_ARATH	Q9ZUX4	Q8LBD1	OrderedLocusNames=At2g27730	na	Arabidopsis thaliana (Mouse-ear cress)	3702
High	Master Protein	GLYMA_17G046500	K03564 - peroxiredoxin Q/BCP (BCP, PRXQ, DOT5) (1 of 2)	0	149.843	45	12	49	2	213	23.3	9.41	181.43	12	9	0.782	0.826783	25.86	113	87	5.98	16	High	High	High	High	High	High	1		3	3	Present Both	1	GLYMA_17G046500	GLYMA_17G046500	sp|Q9LU86|PRXQ_ARATH	Peroxiredoxin Q, chloroplastic GN=PRXQ	ident:154/213 pos:173/213 query:213 hit:216 align:213 bit:301.2	OK	Peroxiredoxin Q, chloroplastic	Thioredoxin peroxidase	PRXQ_ARATH	Q9LU86	na	PRXQ	na	Arabidopsis thaliana (Mouse-ear cress)	3702
High	Master Protein	GLYMA_10G058500	K11294 - nucleolin (NCL, NSR1) (1 of 11)	0	149.296	55	17	62	11	275	29.4	5.5	259.15	17	0	0.761	0.773088	33.65	112.3	87.7	9.72	24.69	High	High	High	High	High	High	1	Phospho [S241; S248]	3	3	Present Both	1	GLYMA_10G058500	GLYMA_10G058500	sp|Q9ZUU4|CP29B_ARATH	RNA-binding protein CP29B, chloroplastic GN=CP29B	ident:156/275 pos:187/275 query:275 hit:289 align:258 bit:275.8	OK	RNA-binding protein CP29B, chloroplastic	Ribonucleoprotein At2g37220	CP29B_ARATH	Q9ZUU4	Q7GA50; Q8L941	CP29B	na	Arabidopsis thaliana (Mouse-ear cress)	3702
High	Master Protein	GLYMA_03G171100	PTHR19375//PTHR19375:SF200 - HEAT SHOCK PROTEIN 70KDA // SUBFAMILY NOT NAMED (1 of 1)	0	148.945	30	18	56	13	653	71.4	5.16	186.02	18	5	1.059	0.967093	50.71	110.5	89.5	20.46	31.12	High	High	High	High	High	High	1		3	3	Present Both	1	GLYMA_03G171100	GLYMA_03G171100	sp|P22953|MD37E_ARATH	Probable mediator of RNA polymerase II transcription subunit 37e GN=MED37E	ident:601/653 pos:624/653 query:653 hit:651 align:653 bit:1228.0	OK	Probable mediator of RNA polymerase II transcription subunit 37e	Heat shock 70 kDa protein 1; Heat shock cognate 70 kDa protein 1; Heat shock cognate protein 70-1 (AtHsc70-1); Heat shock protein 70-1 (AtHsp70-1); Protein EARLY-RESPONSIVE TO DEHYDRATION 2	MD37E_ARATH	P22953	Q93VU6; Q9LZ52	MED37E	ERD2; HSC70-1; HSP70-1; MED37_4	Arabidopsis thaliana (Mouse-ear cress)	3702
High	Master Protein	GLYMA_02G047600	1.6.99.1 - NADPH dehydrogenase / NADPH diaphorase (1 of 3)	0	148.853	40	15	61	1	362	40.4	8.21	201.95	15	15	0.86	0.941929	47.37	116.5	83.5	15.35	16.27	High	High	High	High	Peak Found	High	1		3	3	Present Both	1	GLYMA_02G047600	GLYMA_02G047600	sp|Q9FKW6|FNRL1_ARATH	Ferredoxin--NADP reductase, leaf isozyme 1, chloroplastic GN=LFNR1	ident:308/362 pos:338/362 query:362 hit:360 align:366 bit:609.0	OK	Ferredoxin--NADP reductase, leaf isozyme 1, chloroplastic	Leaf FNR 1 (AtLFNR1; FNR-1)	FNRL1_ARATH	Q9FKW6	Q0WWE2; Q9SUJ3	LFNR1	PETH1	Arabidopsis thaliana (Mouse-ear cress)	3702
High	Master Protein	GLYMA_16G044900	K05298 - glyceraldehyde-3-phosphate dehydrogenase (NADP+) (phosphorylating) (GAPA) (1 of 4)	0	148.794	41	15	54	2	403	43.2	7.75	190.06	15	13	0.752	0.750221	32.86	125.4	74.6	34.6	42.06	High	High	Not Found	High	Peak Found	Peak Found	1		2	3	Present Both	1	GLYMA_16G044900	GLYMA_16G044900	sp|P25856|G3PA1_ARATH	Glyceraldehyde-3-phosphate dehydrogenase GAPA1, chloroplastic GN=GAPA1	ident:347/403 pos:370/403 query:403 hit:396 align:404 bit:657.1	OK	Glyceraldehyde-3-phosphate dehydrogenase GAPA1, chloroplastic	NADP-dependent glyceraldehydephosphate dehydrogenase A subunit 1	G3PA1_ARATH	P25856	Q41184; Q9LSE6	GAPA1	GAPA	Arabidopsis thaliana (Mouse-ear cress)	3702
High	Master Protein	GLYMA_02G233700	PF16940 - Chloroplast envelope transporter (Tic110) (1 of 4)	0	148.268	21	16	70	7	995	109.9	6.33	274.61	16	10	0.933	0.975604	60.04	101.2	98.8	1.65	26.85	High	High	High	High	High	High	1		3	3	Present Both	1	GLYMA_02G233700	GLYMA_02G233700	sp|Q8LPR9|TI110_ARATH	Protein TIC110, chloroplastic GN=TIC110	ident:689/995 pos:832/995 query:995 hit:1016 align:1004 bit:1379.8	OK	Protein TIC110, chloroplastic	Translocon at the inner envelope membrane of chloroplasts 110 (AtTIC110)	TI110_ARATH	Q8LPR9	Q0WMF8; Q8LPG5; Q9LMI9; Q9M9Z7	TIC110	na	Arabidopsis thaliana (Mouse-ear cress)	3702
High	Master Protein	GLYMA_02G014000	K09584 - protein disulfide-isomerase A6 (PDIA6, TXNDC7) (1 of 6)	0	148.147	46	21	45	7	364	40.4	5.59	127.17	21	9	1.066	0.963822	126.66	120	80	121.72	138.66	Peak Found	Peak Found	High	High	Peak Found	High	1		3	3	Present Both	1	GLYMA_02G014000	GLYMA_02G014000	sp|O22263|PDI21_ARATH	Protein disulfide-isomerase like 2-1 GN=PDIL2-1	ident:261/364 pos:296/364 query:364 hit:361 align:332 bit:550.4	OK	Protein disulfide-isomerase like 2-1 (AtPDIL2-1)	P5; Protein MATERNAL EFFECT EMBRYO ARREST 30; Protein UNFERTILIZED EMBRYO SAC 5; Protein disulfide isomerase 11 (AtPDI11); Protein disulfide-isomerase A6; Protein disulfide-isomerase like 4-1 (AtPDIL4-1)	PDI21_ARATH	O22263	Q546R3	PDIL2-1	MEE30; PDI11; PDIL4-1; UNE5	Arabidopsis thaliana (Mouse-ear cress)	3702
High	Master Protein	GLYMA_20G045500	PTHR11413//PTHR11413:SF50 - CYSTATIN FAMILY MEMBER // SUBFAMILY NOT NAMED (1 of 4)	0	147.947	92	14	73	5	97	10.7	6.09	256.03	14	0	0.973	0.999087	60.59	114.1	85.9	59.12	62.2	High	High	High	High	High	High	1		3	3	Present Both	1	GLYMA_20G045500	GLYMA_20G045500	sp|Q8H0X6|CYT6_ARATH	Cysteine proteinase inhibitor 6 GN=CYS6	ident:65/97 pos:80/97 query:97 hit:234 align:97 bit:136.0	Partial_match_hit	Cysteine proteinase inhibitor 6 (AtCYS-6)	PIP-M; PRLI-interacting factor M	CYT6_ARATH	Q8H0X6	Q8VZA2; Q9FUB0; Q9LHF9	CYS6	na	Arabidopsis thaliana (Mouse-ear cress)	3702
High	Master Protein	GLYMA_02G245100	PTHR11467//PTHR11467:SF49 - HISTONE H1/H5 // SUBFAMILY NOT NAMED (1 of 6)	0	147.739	64	9	53	1	176	18.8	10.42	197.84	9	0	0.568	0.326737	28.37	127.5	72.5	65.15	46.74	Peak Found	High	High	High	High	Peak Found	1	Phospho [S122]	3	3	Present Both	1	GLYMA_02G245100	GLYMA_02G245100	sp|Q43386|HMGYA_ARATH	HMG-Y-related protein A GN=HMGA	ident:94/176 pos:113/176 query:176 hit:204 align:179 bit:129.4	OK	HMG-Y-related protein A (AtHMGA)	High mobility group A protein	HMGYA_ARATH	Q43386	P92954; Q8LGC1	HMGA	na	Arabidopsis thaliana (Mouse-ear cress)	3702
High	Master Protein	GLYMA_13G071800	PTHR11413//PTHR11413:SF50 - CYSTATIN FAMILY MEMBER // SUBFAMILY NOT NAMED (1 of 4)	0	147.012	92	15	68	6	97	10.7	6.09	246.5	15	9	0.967	0.999087	57.09	114.5	85.5	33.06	32.52	High	High	High	High	High	High	1		3	3	Present Both	1	GLYMA_13G071800	GLYMA_13G071800	sp|Q8H0X6|CYT6_ARATH	Cysteine proteinase inhibitor 6 GN=CYS6	ident:65/97 pos:79/97 query:97 hit:234 align:97 bit:134.8	Partial_match_hit	Cysteine proteinase inhibitor 6 (AtCYS-6)	PIP-M; PRLI-interacting factor M	CYT6_ARATH	Q8H0X6	Q8VZA2; Q9FUB0; Q9LHF9	CYS6	na	Arabidopsis thaliana (Mouse-ear cress)	3702
High	Master Protein	GLYMA_18G048200	PTHR22904:SF373 - PROTEIN TIC 40, CHLOROPLASTIC (1 of 2)	0	146.255	35	15	53	4	432	47.3	6.44	154.72	15	15	3.203	0.000627319	68.88	41.5	158.5	42.92	47.29	Peak Found	Peak Found	Peak Found	High	High	High	1		3	3	Present Both	1	GLYMA_18G048200	GLYMA_18G048200	sp|Q9FMD5|TIC40_ARATH	Protein TIC 40, chloroplastic GN=TIC40	ident:230/432 pos:274/432 query:432 hit:447 align:398 bit:387.5	OK	Protein TIC 40, chloroplastic	Protein PIGMENT DEFECTIVE EMBRYO 120; Translocon at the inner envelope membrane of chloroplasts 40 (AtTIC40)	TIC40_ARATH	Q9FMD5	na	TIC40	PDE120	Arabidopsis thaliana (Mouse-ear cress)	3702
High	Master Protein	GLYMA_13G193600	K03950 - NADH dehydrogenase (ubiquinone) 1 alpha subcomplex subunit 6 (NDUFA6) (1 of 2)	0	146.232	85	14	99	3	131	15.1	8.7	318.04	14	14	0.968	0.999087	43.61	93	107	11.1	20.85	High	High	High	High	High	High	1		3	3	Present Both	1	GLYMA_13G193600	GLYMA_13G193600	sp|Q9LHI0|NDUA6_ARATH	NADH dehydrogenase [ubiquinone] 1 alpha subcomplex subunit 6 GN=NDC80	ident:84/131 pos:107/131 query:131 hit:133 align:128 bit:188.0	OK	NADH dehydrogenase [ubiquinone] 1 alpha subcomplex subunit 6	na	NDUA6_ARATH	Q9LHI0	na	OrderedLocusNames=At3g12260	na	Arabidopsis thaliana (Mouse-ear cress)	3702
High	Master Protein	GLYMA_15G273900	K02137 - F-type H+-transporting ATPase subunit O (ATPeF0O, ATP5O, ATP5) (1 of 2)	0	145.691	52	14	50	2	245	26.9	9.44	163.01	14	9	0.996	0.99396	66.55	100.1	99.9	18.31	48.39	High	High	Peak Found	High	Peak Found	High	1		3	3	Present Both	1	GLYMA_15G273900	GLYMA_15G273900	sp|Q96251|ATPO_ARATH	ATP synthase subunit O, mitochondrial GN=atpH	ident:135/245 pos:181/245 query:245 hit:238 align:243 bit:278.9	OK	ATP synthase subunit O, mitochondrial	Oligomycin sensitivity conferral protein (OSCP)	ATPO_ARATH	Q96251	Q93W68; Q9LYR1	OrderedLocusNames=At5g13450	na	Arabidopsis thaliana (Mouse-ear cress)	3702
High	Master Protein	GLYMA_02G245000	PTHR11467//PTHR11467:SF49 - HISTONE H1/H5 // SUBFAMILY NOT NAMED (1 of 6)	0	145.174	64	9	53	1	176	18.8	10.42	201.33	9	6	0.81	0.879928	29.4	103.9	96.1	42.18	49.08	High	High	Peak Found	High	High	High	1	Phospho [S122]	3	3	Present Both	1	GLYMA_02G245000	GLYMA_02G245000	sp|Q43386|HMGYA_ARATH	HMG-Y-related protein A GN=HMGA	ident:93/176 pos:112/176 query:176 hit:204 align:179 bit:127.9	OK	HMG-Y-related protein A (AtHMGA)	High mobility group A protein	HMGYA_ARATH	Q43386	P92954; Q8LGC1	HMGA	na	Arabidopsis thaliana (Mouse-ear cress)	3702
High	Master Protein	GLYMA_14G067000	PTHR32429:SF12 - RIBULOSE BISPHOSPHATE CARBOXYLASE/OXYGENASE ACTIVASE, CHLOROPLASTIC (1 of 3)	0	144.698	40	18	54	3	478	52.4	5.96	179.65	18	2	0.611	0.443365	9.42	139.4	60.6	57.46	23.64	High	High	Peak Found	Peak Found	Not Found	Peak Found	1		3	2	Present Both	1	GLYMA_14G067000	GLYMA_14G067000	sp|P10896|RCA_ARATH	Ribulose bisphosphate carboxylase/oxygenase activase, chloroplastic GN=RCA	ident:384/478 pos:426/478 query:478 hit:474 align:478 bit:803.5	OK	Ribulose bisphosphate carboxylase/oxygenase activase, chloroplastic (RA; RuBisCO activase)	na	RCA_ARATH	P10896	Q39197; Q39198; Q8H172; Q940T8; Q941B7	RCA	na	Arabidopsis thaliana (Mouse-ear cress)	3702
High	Master Protein	GLYMA_16G127300	1.6.99.1 - NADPH dehydrogenase / NADPH diaphorase (1 of 3)	0	143.848	41	15	57	1	362	40.5	7.93	192.42	15	0	0.869	0.948424	12.56	107	93	17.82	17.52	Peak Found	Peak Found	Not Found	Peak Found	High	Not Found	1		2	2	Present Both	1	GLYMA_16G127300	GLYMA_16G127300	sp|Q9FKW6|FNRL1_ARATH	Ferredoxin--NADP reductase, leaf isozyme 1, chloroplastic GN=LFNR1	ident:309/362 pos:337/362 query:362 hit:360 align:366 bit:610.5	OK	Ferredoxin--NADP reductase, leaf isozyme 1, chloroplastic	Leaf FNR 1 (AtLFNR1; FNR-1)	FNRL1_ARATH	Q9FKW6	Q0WWE2; Q9SUJ3	LFNR1	PETH1	Arabidopsis thaliana (Mouse-ear cress)	3702
High	Master Protein	GLYMA_12G087100	PTHR13140//PTHR13140:SF460 - MYOSIN // SUBFAMILY NOT NAMED (1 of 1)	0	143.412	21	17	55	9	738	82.7	5.41	180.35	17	9	1.117	0.933667	52.11	105.9	94.1	32.94	12.21	High	High	High	High	High	High	1		3	3	Present Both	1	GLYMA_12G087100	GLYMA_12G087100	sp|Q9LW85|MFP1_ARATH	MAR-binding filament-like protein 1 GN=MFP1	ident:310/738 pos:465/738 query:738 hit:726 align:704 bit:469.5	Poor_match	MAR-binding filament-like protein 1	na	MFP1_ARATH	Q9LW85	Q7Y1Z5	MFP1	na	Arabidopsis thaliana (Mouse-ear cress)	3702
High	Master Protein	GLYMA_02G209000	PTHR31356:SF6 - THYLAKOID LUMENAL 29 KDA PROTEIN, CHLOROPLASTIC (1 of 2)	0	143.098	46	15	52	2	347	37.7	6.61	163.25	15	0	0.603	0.578432	7.26	124.7	75.3	5.84	19.64	High	High	Not Found	Not Found	Peak Found	High	1		2	2	Present Both	1	GLYMA_02G209000	GLYMA_02G209000	sp|P82281|TL29_ARATH	Thylakoid lumenal 29 kDa protein, chloroplastic GN=TL29	ident:244/347 pos:273/347 query:347 hit:349 align:350 bit:472.2	OK	Thylakoid lumenal 29 kDa protein, chloroplastic (TL29)	AtAPx07; P29; Probable L-ascorbate peroxidase 4	TL29_ARATH	P82281	Q7XZP6; Q9M0S6	TL29	APX4	Arabidopsis thaliana (Mouse-ear cress)	3702
High	Master Protein	GLYMA_15G271200	KOG0131 - Splicing factor 3b, subunit 4 (1 of 43)	0	142.758	61	12	48	5	246	26.8	9.38	165.55	12	8	0.885	0.963221	57.84	105.7	94.3	24.82	43.21	High	High	High	High	Peak Found	High	1		3	3	Present Both	1	GLYMA_15G271200	GLYMA_15G271200	sp|Q8VYM4|PSRP2_ARATH	30S ribosomal protein 2, chloroplastic GN=PSRP2	ident:150/246 pos:179/246 query:246 hit:253 align:227 bit:288.9	OK	30S ribosomal protein 2, chloroplastic	Chloroplastic small ribosomal subunit protein cS22; Plastid-specific 30S ribosomal protein 2, chloroplastic (PSRP-2)	PSRP2_ARATH	Q8VYM4	B9DG26; Q9SUZ0	PSRP2	na	Arabidopsis thaliana (Mouse-ear cress)	3702
High	Master Protein	GLYMA_13G113200	K03564 - peroxiredoxin Q/BCP (BCP, PRXQ, DOT5) (1 of 2)	0	140.648	45	11	49	1	214	23.3	9.47	164.91	11	0	0.843	0.921221	28.73	108.5	91.5	11.95	37.92	High	High	High	High	High	High	1		3	3	Present Both	1	GLYMA_13G113200	GLYMA_13G113200	sp|Q9LU86|PRXQ_ARATH	Peroxiredoxin Q, chloroplastic GN=PRXQ	ident:155/214 pos:173/214 query:214 hit:216 align:214 bit:294.7	OK	Peroxiredoxin Q, chloroplastic	Thioredoxin peroxidase	PRXQ_ARATH	Q9LU86	na	PRXQ	na	Arabidopsis thaliana (Mouse-ear cress)	3702
High	Master Protein	GLYMA_15G047000	PF04755 - PAP_fibrillin (PAP_fibrillin) (1 of 23)	0	140.111	66	15	69	4	245	27.7	9.36	228.99	15	0	0.347	0.00474154	9.72	169.8	30.2	71.76	46.17	High	High	High	High	High	Peak Found	1		3	3	Present Both	1	GLYMA_15G047000	GLYMA_15G047000	sp|Q9LU85|PAP4_ARATH	Probable plastid-lipid-associated protein 4, chloroplastic GN=PAP4	ident:139/245 pos:173/245 query:245 hit:242 align:249 bit:268.1	OK	Probable plastid-lipid-associated protein 4, chloroplastic	Fibrillin-3a; Plastoglobulin 25 (AtPGL25)	PAP4_ARATH	Q9LU85	Q8W4A9	PAP4	FBN3a; FIB3a; PGL25	Arabidopsis thaliana (Mouse-ear cress)	3702
High	Master Protein	GLYMA_11G216200	PTHR19965:SF33 - THO COMPLEX SUBUNIT 4D (1 of 2)	0	139.458	51	14	59	14	298	31.7	11.41	205.68	14	0	1.103	0.943898	64.31	96.9	103.1	28.58	30.86	High	High	High	High	High	High	1		3	3	Present Both	1	GLYMA_11G216200	GLYMA_11G216200	sp|Q6NQ72|THO4D_ARATH	THO complex subunit 4D GN=ALY4	ident:148/298 pos:173/298 query:298 hit:288 align:241 bit:235.0	Poor_match	THO complex subunit 4D	ALYREF homolog 4 (AtALY4)	THO4D_ARATH	Q6NQ72	Q9FHP9; Q9LF76	ALY4	na	Arabidopsis thaliana (Mouse-ear cress)	3702
High	Master Protein	GLYMA_18G041700	K03934 - NADH dehydrogenase (ubiquinone) Fe-S protein 1 (NDUFS1) (1 of 2)	0	139.303	37	16	41	3	746	81.2	6.62	132.52	16	0	1.33	0.727639	65.2	110	90	14.8	44.57	High	High	High	High	Peak Found	High	1		3	3	Present Both	1	GLYMA_18G041700	GLYMA_18G041700	sp|Q9FGI6|NDUS1_ARATH	NADH dehydrogenase [ubiquinone] iron-sulfur protein 1, mitochondrial GN=EMB1467	ident:601/746 pos:666/746 query:746 hit:748 align:746 bit:1237.6	OK	NADH dehydrogenase [ubiquinone] iron-sulfur protein 1, mitochondrial	Protein EMBRYO DEFECTIVE 1467	NDUS1_ARATH	Q9FGI6	Q940B1	EMB1467	na	Arabidopsis thaliana (Mouse-ear cress)	3702
High	Master Protein	GLYMA_05G041900	K02358 - elongation factor Tu (tuf, TUFM) (1 of 8)	0	138.347	26	12	46	1	479	52.5	6.81	175.83	12	0	0.884	0.952679	13.11	107.6	92.4	16.35	15.38	High	High	Not Found	High	High	High	1		2	3	Present Both	1	GLYMA_05G041900	GLYMA_05G041900	sp|P17745|EFTU_ARATH	Elongation factor Tu, chloroplastic GN=TUFA	ident:388/479 pos:424/479 query:479 hit:476 align:460 bit:775.0	OK	Elongation factor Tu, chloroplastic (EF-Tu)	Ras-related protein RABE1b (AtRABE1b); Ras-related protein Rab8D (AtRab8D)	EFTU_ARATH	P17745	Q8GTE7	TUFA	RAB8D; RABE1B	Arabidopsis thaliana (Mouse-ear cress)	3702
High	Master Protein	GLYMA_12G066700	K02893 - large subunit ribosomal protein L23Ae (RP-L23Ae, RPL23A) (1 of 6)	0	136.807	56	14	70	14	151	17.2	10.21	216.88	14	0	1.785	0.229208	66.74	56.8	143.2	11.56	31.65	High	High	High	High	High	High	1		3	3	Present Both	1	GLYMA_12G066700	GLYMA_12G066700	sp|Q9M3C3|R23A2_ARATH	60S ribosomal protein L23a-2 GN=RPL23AB	ident:114/151 pos:116/151 query:151 hit:154 align:128 bit:204.9	OK	60S ribosomal protein L23a-2	na	R23A2_ARATH	Q9M3C3	na	RPL23AB	na	Arabidopsis thaliana (Mouse-ear cress)	3702
High	Master Protein	GLYMA_07G012800	K02903 - large subunit ribosomal protein L28e (RP-L28e, RPL28) (1 of 4)	0	135.878	60	16	75	2	150	16.9	10.7	264.5	16	0	0.812	0.885952	34.86	112.6	87.4	29.84	37.65	High	High	High	High	High	High	1		3	3	Present Both	1	GLYMA_07G012800	GLYMA_07G012800	sp|Q9M0E2|RL282_ARATH	60S ribosomal protein L28-2 GN=RPL28C	ident:104/150 pos:124/150 query:150 hit:143 align:143 bit:222.6	OK	60S ribosomal protein L28-2	na	RL282_ARATH	Q9M0E2	na	RPL28C	na	Arabidopsis thaliana (Mouse-ear cress)	3702
High	Master Protein	GLYMA_09G022400	PTHR31388:SF22 - PEROXIDASE 22-RELATED (1 of 14)	0	135.374	30	11	45	11	355	38.5	6.04	190.38	11	0	1.187	0.862357	54.57	93.2	106.8	58.27	31.19	High	High	High	High	High	High	1		3	3	Present Both	1	GLYMA_09G022400	GLYMA_09G022400	sp|P24102|PER22_ARATH	Peroxidase 22 GN=PER22	ident:193/355 pos:244/355 query:355 hit:349 align:321 bit:389.4	OK	Peroxidase 22 (Atperox P22)	ATPEa; Basic peroxidase E	PER22_ARATH	P24102	O80913	PER22	P22; PRXEA	Arabidopsis thaliana (Mouse-ear cress)	3702
High	Master Protein	GLYMA_11G117300	PF00076 - RNA recognition motif. (a.k.a. RRM, RBD, or RNP domain) (RRM_1) (1 of 477)	0	134.904	51	10	55	4	171	16.6	5.63	215.52	10	1	0.819	0.897177	37.46	125.6	74.4	54.48	58.45	High	High	High	High	High	High	1		3	3	Present Both	1	GLYMA_11G117300	GLYMA_11G117300	sp|Q03250|RBG7_ARATH	Glycine-rich RNA-binding protein 7 GN=RBG7	ident:70/171 pos:81/171 query:171 hit:176 align:85 bit:154.5	Partial_match_both	Glycine-rich RNA-binding protein 7 (AtGR-RBP7)	AtRBG7; Glycine-rich protein 7 (AtGRP7); Protein COLD, CIRCADIAN RHYTHM, AND RNA BINDING 2 (Protein CCR2)	RBG7_ARATH	Q03250	C0Z304; Q8LEV4; Q94B62	RBG7	CCR2; GR-RBP7; GRP7	Arabidopsis thaliana (Mouse-ear cress)	3702
High	Master Protein	GLYMA_11G012700	PTHR17130 - MITOCHONDRIAL OUTER MEMBRANE PROTEIN 25 (1 of 14)	0	134.311	24	7	47	7	360	38.8	9.72	218.41	7	0	0.73	0.727639	17.88	116.6	83.4	7.37	14.29	High	High	High	High	High	High	1		3	3	Present Both	1	GLYMA_11G012700	GLYMA_11G012700	sp|Q94BS2|MET1_ARATH	Protein MET1, chloroplastic GN=MET1	ident:26/360 pos:39/360 query:360 hit:335 align:67 bit:50.8	Partial_match_both	Protein MET1, chloroplastic	PDZ domain, K-box domain, and TPR region containing protein	MET1_ARATH	Q94BS2	Q8L972; Q9ZVU6	MET1	na	Arabidopsis thaliana (Mouse-ear cress)	3702
High	Master Protein	GLYMA_06G080100	KOG1003 - Actin filament-coating protein tropomyosin (1 of 28)	0	133.923	31	15	57	15	446	50.8	9.29	175.29	15	0	1.049	0.970587	48.64	95	105	13.46	18.75	High	High	High	High	High	High	1		3	3	Present Both	1	GLYMA_06G080100	GLYMA_06G080100	sp|F4IJK6|KN14R_ARATH	Kinesin-like protein KIN-14R GN=KIN14R	ident:43/446 pos:84/446 query:446 hit:1083 align:167 bit:35.4	Partial_match_both	Kinesin-like protein KIN-14R	na	KN14R_ARATH	F4IJK6	F4IJK7; Q9ZQ52	KIN14R	na	Arabidopsis thaliana (Mouse-ear cress)	3702
High	Master Protein	GLYMA_06G015300		0	133.831	72	14	54	14	167	19.5	9.64	183.44	14	0	1.257	0.763883	51	97.2	102.8	41.46	20.44	High	High	High	High	High	High	1	Acetyl [N-Term]	3	3	Present Both	1	GLYMA_06G015300	GLYMA_06G015300	sp|Q9FPG2|OP21B_ARATH	Outer envelope pore protein 21B, chloroplastic GN=OEP21B	ident:97/167 pos:131/167 query:167 hit:167 align:167 bit:226.5	OK	Outer envelope pore protein 21B, chloroplastic	Chloroplastic outer envelope pore protein of 21 kDa B	OP21B_ARATH	Q9FPG2	F4I2D6	OEP21B	na	Arabidopsis thaliana (Mouse-ear cress)	3702
High	Master Protein	GLYMA_06G171800	PTHR23359//PTHR23359:SF99 - NUCLEOTIDE KINASE // SUBFAMILY NOT NAMED (1 of 5)	0	133.743	23	7	66	1	201	22.2	8.29	294.06	7	0	2.488	0.345591	28.98	57.3	142.7		56.86	Peak Found	Not Found	Not Found	Peak Found	Peak Found	High	1		1	3	Only Sample	1	GLYMA_06G171800	GLYMA_06G171800	sp|Q9FK35|KAD3_ARATH	Adenylate kinase 3 GN=ADK2	ident:137/201 pos:163/201 query:201 hit:248 align:196 bit:289.7	OK	Adenylate kinase 3 (AK 3)	ATP-AMP transphosphorylase 3; ATP:AMP phosphotransferase; Adenylate monophosphate kinase 3 (AMK3)	KAD3_ARATH	Q9FK35	Q0WSP2; Q8LD90	ADK2	na	Arabidopsis thaliana (Mouse-ear cress)	3702
High	Master Protein	GLYMA_05G216700	PTHR11349:SF53 - NUCLEOSIDE DIPHOSPHATE KINASE-RELATED (1 of 2)	0	133.68	40	15	68	15	235	25.2	9.13	191.99	15	0	1.111	0.941109	113.22	98.6	101.4	99.57	114.25	High	High	High	High	High	High	1		3	3	Present Both	1	GLYMA_05G216700	GLYMA_05G216700	sp|Q8LAH8|NDK4_ARATH	Nucleoside diphosphate kinase IV, chloroplastic/mitochondrial GN=NDK4	ident:187/235 pos:213/235 query:235 hit:237 align:242 bit:383.6	OK	Nucleoside diphosphate kinase IV, chloroplastic/mitochondrial (NDK IV; NDP kinase IV; NDPK IV)	Nucleoside diphosphate kinase 4	NDK4_ARATH	Q8LAH8	Q9T0A5	NDK4	na	Arabidopsis thaliana (Mouse-ear cress)	3702
High	Master Protein	GLYMA_03G164500	K11130 - H/ACA ribonucleoprotein complex subunit 3 (NOP10, NOLA3) (1 of 2)	0	133.528	89	8	61	4	64	7.5	9.85	254.64	8	3	1.163	0.896729	50.13	104.1	95.9	27.45	29.96	High	High	High	High	High	High	1		3	3	Present Both	1	GLYMA_03G164500	GLYMA_03G164500	sp|Q93XX8|NOP10_ARATH	H/ACA ribonucleoprotein complex subunit 3-like protein GN=NUP205	ident:52/64 pos:58/64 query:64 hit:64 align:64 bit:111.3	OK	H/ACA ribonucleoprotein complex subunit 3-like protein	Nucleolar protein 10	NOP10_ARATH	Q93XX8	Q9SIM0	OrderedLocusNames=At2g20490	na	Arabidopsis thaliana (Mouse-ear cress)	3702
High	Master Protein	GLYMA_05G134900	1.6.5.3 - NADH:ubiquinone reductase (H(+)-translocating) / Ubiquinone reductase (1 of 59)	0	132.634	55	4	54	4	108	12.3	7.34	275.68	4	0	1.39	0.637814	62.2	76.7	123.3	23.82	16.94	High	High	High	High	High	High	1		3	3	Present Both	1	GLYMA_05G134900	GLYMA_05G134900	sp|F4I460|MYO8_ARATH	Myosin-8 GN=XI-B	ident:16/108 pos:27/108 query:108 hit:1500 align:51 bit:28.1	Partial_match_both	Myosin-8	Myosin XI B (AtXIB)	MYO8_ARATH	F4I460	O64491	XI-B	XIB	Arabidopsis thaliana (Mouse-ear cress)	3702
High	Master Protein	GLYMA_08G165500	PTHR11406:SF8 - PHOSPHOGLYCERATE KINASE 1, CHLOROPLASTIC-RELATED (1 of 2)	0	131.3	46	14	52	1	485	50.2	8.13	169.38	14	0	0.363	0.00985368	9.9	146.8	53.2	26.28	74.63	High	High	Peak Found	High	High	Peak Found	1		3	3	Present Both	1	GLYMA_08G165500	GLYMA_08G165500	sp|P50318|PGKH2_ARATH	Phosphoglycerate kinase 2, chloroplastic GN=PGK1	ident:385/485 pos:417/485 query:485 hit:478 align:441 bit:771.2	OK	Phosphoglycerate kinase 2, chloroplastic	na	PGKH2_ARATH	P50318	Q42542; Q9C7J4; Q9SGU6	OrderedLocusNames=At1g56190	na	Arabidopsis thaliana (Mouse-ear cress)	3702
High	Master Protein	GLYMA_08G367400	K17781 - mitochondrial import inner membrane translocase subunit TIM13 (TIM13) (1 of 2)	0	130.58	62	8	56	4	86	9.4	8.18	233.08	8	4	1.8	0.215	49.33	80.1	119.9	46.02	49.16	High	High	High	High	High	High	1	Acetyl [N-Term]	3	3	Present Both	1	GLYMA_08G367400	GLYMA_08G367400	sp|Q9XH48|TIM13_ARATH	Mitochondrial import inner membrane translocase subunit TIM13 GN=TIM13	ident:51/86 pos:67/86 query:86 hit:87 align:85 bit:85.9	OK	Mitochondrial import inner membrane translocase subunit TIM13	na	TIM13_ARATH	Q9XH48	Q94KC4; Q9SY93	TIM13	na	Arabidopsis thaliana (Mouse-ear cress)	3702
High	Master Protein	GLYMA_11G001000	PTHR13844:SF8 - EXPRESSED PROTEIN (1 of 2)	0	130.302	47	7	42	7	148	16.5	9.54	161.65	7	0	0.866	0.947586	32.97	109.8	90.2	31.62	29.3	High	High	High	High	High	High	1		3	3	Present Both	1	GLYMA_11G001000	GLYMA_11G001000	sp|Q9FMT4|SNF12_ARATH	SWI/SNF complex component SNF12 homolog GN=ASNAP1	ident:24/148 pos:42/148 query:148 hit:534 align:71 bit:50.8	Partial_match_both	SWI/SNF complex component SNF12 homolog	na	SNF12_ARATH	Q9FMT4	na	OrderedLocusNames=At5g14170	na	Arabidopsis thaliana (Mouse-ear cress)	3702
High	Master Protein	GLYMA_12G232900	K02634 - apocytochrome f (petA) (1 of 1)	0	130.102	39	19	47	19	320	35.3	8.82	143.29	19	0	0.734	0.727639	31.37	122.1	77.9	13.68	5.03	High	High	High	High	High	High	1		3	3	Present Both	1	GLYMA_12G232900	GLYMA_12G232900	sp|P56771|CYF_ARATH	Cytochrome f GN=petA	ident:282/320 pos:299/320 query:320 hit:320 align:320 bit:578.6	OK	Cytochrome f	na	CYF_ARATH	P56771	na	petA	na	Arabidopsis thaliana (Mouse-ear cress)	3702
High	Master Protein	GLYMA_06G139200	PTHR14110//PTHR14110:SF6 - MITOCHONDRIAL IMPORT INNER MEMBRANE TRANSLOCASE SUBUNIT TIM22 // SUBFAMILY NOT NAMED (1 of 2)	0	129.679	39	12	54	5	260	27.6	9.77	203.07	12	5	0.974	0.999087	78.17	145.7	54.3	12.33	68.33	High	High	High	High	High	High	1	Acetyl [N-Term]	3	3	Present Both	1	GLYMA_06G139200	GLYMA_06G139200	sp|Q9FLT9|HP302_ARATH	Chloroplastic import inner membrane translocase subunit HP30-2 GN=HP30-2	ident:157/260 pos:187/260 query:260 hit:259 align:244 bit:318.5	OK	Chloroplastic import inner membrane translocase subunit HP30-2	Hypothetical inner plastid envelope protein of 30 kDa 2 (AtHP30-2; Hypothetical protein 30-2)	HP302_ARATH	Q9FLT9	Q8L9N9	HP30-2	na	Arabidopsis thaliana (Mouse-ear cress)	3702
High	Master Protein	GLYMA_14G196700	K12845 - U4/U6 small nuclear ribonucleoprotein SNU13 (SNU13, NHP2L) (1 of 4)	0	129.338	63	7	43	2	128	13.8	7.12	197.77	7	0	1.726	0.328462	40.99	81.4	118.6	44.96	84.54	High	High	High	High	High	High	1		3	3	Present Both	1	GLYMA_14G196700	GLYMA_14G196700	sp|Q9LEY9|NHP2_ARATH	H/ACA ribonucleoprotein complex subunit 2-like protein GN=NHL6	ident:48/128 pos:73/128 query:128 hit:156 align:131 bit:88.6	Poor_match	H/ACA ribonucleoprotein complex subunit 2-like protein	Nhp2-like protein	NHP2_ARATH	Q9LEY9	na	OrderedLocusNames=At5g08180	na	Arabidopsis thaliana (Mouse-ear cress)	3702
High	Master Protein	GLYMA_12G231900	K02109 - F-type H+-transporting ATPase subunit b (ATPF0B, atpF) (1 of 3)	0	128.976	73	10	39	10	127	14.8	8.72	169.16	10	0	0.93	0.974214	56.94	94.4	105.6	27.65	48.84	High	High	High	High	High	High	1		3	3	Present Both	1	GLYMA_12G231900	GLYMA_12G231900	sp|P56759|ATPF_ARATH	ATP synthase subunit b, chloroplastic GN=atpF	ident:106/127 pos:116/127 query:127 hit:184 align:127 bit:211.5	OK	ATP synthase subunit b, chloroplastic	ATP synthase F(0) sector subunit b; ATPase subunit I	ATPF_ARATH	P56759	na	atpF	na	Arabidopsis thaliana (Mouse-ear cress)	3702
High	Master Protein	GLYMA_14G076000	PTHR35284:SF1 - OUTER ENVELOPE PORE PROTEIN 24A, CHLOROPLASTIC-RELATED (1 of 2)	0	128.412	74	17	64	1	214	23.7	9.26	184.62	17	0	100	1.22204e-16			200			High	High	Not Found	High	Not Found	Not Found	1		2	1	Only Control	1	GLYMA_14G076000	GLYMA_14G076000	sp|Q8H0Y1|OP24B_ARATH	Outer envelope pore protein 24B, chloroplastic GN=OEP24B	ident:148/214 pos:180/214 query:214 hit:213 align:214 bit:320.1	OK	Outer envelope pore protein 24B, chloroplastic	Chloroplastic outer envelope pore protein of 24 kDa B	OP24B_ARATH	Q8H0Y1	A0MFL7; Q93XX9; Q9FMM2	OEP24B	na	Arabidopsis thaliana (Mouse-ear cress)	3702
High	Master Protein	GLYMA_11G109400	K17081 - prohibitin 2 (PHB2) (1 of 4)	0	128.351	52	12	56	4	289	31.8	9.42	238.11	12	1	1.131	0.92428	20.78	91.9	108.1	22.03	19.47	High	High	High	High	High	High	1		3	3	Present Both	1	GLYMA_11G109400	GLYMA_11G109400	sp|Q9SIL6|PHB6_ARATH	Prohibitin-6, mitochondrial GN=PHB6	ident:237/289 pos:264/289 query:289 hit:286 align:289 bit:466.1	OK	Prohibitin-6, mitochondrial (Atphb6)	na	PHB6_ARATH	Q9SIL6	na	PHB6	na	Arabidopsis thaliana (Mouse-ear cress)	3702
High	Master Protein	GLYMA_16G002500	PTHR19375//PTHR19375:SF147 - HEAT SHOCK PROTEIN 70KDA // SUBFAMILY NOT NAMED (1 of 3)	0	127.632	23	18	48	18	689	73.7	5.34	148.02	18	0	0.997	0.99396	55.4	106.9	93.1	34.12	38.09	High	High	High	High	High	High	1		3	3	Present Both	1	GLYMA_16G002500	GLYMA_16G002500	sp|Q9LTX9|HSP7G_ARATH	Heat shock 70 kDa protein 7, chloroplastic GN=HSP70-7	ident:596/689 pos:645/689 query:689 hit:718 align:719 bit:1166.0	OK	Heat shock 70 kDa protein 7, chloroplastic	Chloroplast heat shock protein 70-2 (cpHsc70-2); Heat shock protein 70-7 (AtHsp70-7)	HSP7G_ARATH	Q9LTX9	Q8RXD1; Q9M637	HSP70-7	CPHSC70-2; HSC70-7	Arabidopsis thaliana (Mouse-ear cress)	3702
High	Master Protein	GLYMA_11G011200	K11352 - NADH dehydrogenase (ubiquinone) 1 alpha subcomplex subunit 12 (NDUFA12) (1 of 2)	0	126.912	85	15	65	6	158	18.3	8.84	188.04	15	9	1.183	0.865796	44.39	93.7	106.3	2.92	10.04	High	High	High	High	High	High	1		3	3	Present Both	1	GLYMA_11G011200	GLYMA_11G011200	sp|Q9M9M9|NDUAC_ARATH	Probable NADH dehydrogenase [ubiquinone] 1 alpha subcomplex subunit 12 GN=CBP20	ident:122/158 pos:138/158 query:158 hit:159 align:150 bit:273.5	OK	Probable NADH dehydrogenase [ubiquinone] 1 alpha subcomplex subunit 12	na	NDUAC_ARATH	Q9M9M9	na	OrderedLocusNames=At3g03100	na	Arabidopsis thaliana (Mouse-ear cress)	3702
High	Master Protein	GLYMA_15G231900	K03950 - NADH dehydrogenase (ubiquinone) 1 alpha subcomplex subunit 6 (NDUFA6) (1 of 2)	0	126.728	77	10	69	3	131	15.1	9.31	233.9	10	0	0.826	0.897464	23.73	100.9	99.1	48.39	86.98	High	High	High	High	High	High	1		3	3	Present Both	1	GLYMA_15G231900	GLYMA_15G231900	sp|Q9LHI0|NDUA6_ARATH	NADH dehydrogenase [ubiquinone] 1 alpha subcomplex subunit 6 GN=NDC80	ident:87/131 pos:109/131 query:131 hit:133 align:131 bit:193.4	OK	NADH dehydrogenase [ubiquinone] 1 alpha subcomplex subunit 6	na	NDUA6_ARATH	Q9LHI0	na	OrderedLocusNames=At3g12260	na	Arabidopsis thaliana (Mouse-ear cress)	3702
High	Master Protein	GLYMA_12G199400	1.10.9.1 - Plastoquinol--plastocyanin reductase / Cytochrome b6f complex (1 of 2)	0	125.237	26	9	55	3	227	24.2	8.37	227.83	9	5	0.946	0.986732	44.81	101.4	98.6	10.32	15.76	High	High	High	High	High	High	1		3	3	Present Both	1	GLYMA_12G199400	GLYMA_12G199400	sp|Q9ZR03|UCRIA_ARATH	Cytochrome b6-f complex iron-sulfur subunit, chloroplastic GN=petC	ident:171/227 pos:194/227 query:227 hit:229 align:231 bit:313.2	OK	Cytochrome b6-f complex iron-sulfur subunit, chloroplastic	Plastohydroquinone:plastocyanin oxidoreductase iron-sulfur protein; Proton gradient regulation protein 1; Rieske iron-sulfur protein (ISP; RISP)	UCRIA_ARATH	Q9ZR03	Q94EI4; Q9FYB6	petC	PGR1	Arabidopsis thaliana (Mouse-ear cress)	3702
High	Master Protein	GLYMA_02G249600	PTHR32429:SF12 - RIBULOSE BISPHOSPHATE CARBOXYLASE/OXYGENASE ACTIVASE, CHLOROPLASTIC (1 of 3)	0	125.081	36	17	59	3	478	52.2	6.25	192.49	17	0	1.079	0.974214	14.12	96.2	103.8	13.41		High	High	High	High	High	High	1		3	3	Present Both	1	GLYMA_02G249600	GLYMA_02G249600	sp|P10896|RCA_ARATH	Ribulose bisphosphate carboxylase/oxygenase activase, chloroplastic GN=RCA	ident:385/478 pos:424/478 query:478 hit:474 align:478 bit:803.5	OK	Ribulose bisphosphate carboxylase/oxygenase activase, chloroplastic (RA; RuBisCO activase)	na	RCA_ARATH	P10896	Q39197; Q39198; Q8H172; Q940T8; Q941B7	RCA	na	Arabidopsis thaliana (Mouse-ear cress)	3702
High	Master Protein	GLYMA_08G209700	K02265 - cytochrome c oxidase subunit 5b (COX5B) (1 of 3)	0	124.285	29	7	41	3	160	17.5	5.54	177.03	7	3	1.608	0.399635	104.9	98.5	101.5	63.91	114.25	High	Peak Found	High	High	Peak Found	High	1		3	3	Present Both	1	GLYMA_08G209700	GLYMA_08G209700	sp|Q9SSB8|CX5B2_ARATH	Cytochrome c oxidase subunit 5b-2, mitochondrial GN=COX5B-2	ident:100/160 pos:114/160 query:160 hit:171 align:157 bit:199.1	OK	Cytochrome c oxidase subunit 5b-2, mitochondrial (AtCOX5b-2)	na	CX5B2_ARATH	Q9SSB8	Q8LBW7	COX5B-2	na	Arabidopsis thaliana (Mouse-ear cress)	3702
High	Master Protein	GLYMA_19G106800	K05298 - glyceraldehyde-3-phosphate dehydrogenase (NADP+) (phosphorylating) (GAPA) (1 of 4)	0	123.78	40	14	48	1	403	43.2	8.25	159.58	14	0	0.01	1.22204e-16		200		8.8		High	Peak Found	Not Found	Not Found	Not Found	Not Found	1		2	0	Only Control	1	GLYMA_19G106800	GLYMA_19G106800	sp|Q9LPW0|G3PA2_ARATH	Glyceraldehyde-3-phosphate dehydrogenase GAPA2, chloroplastic GN=GAPA2	ident:348/403 pos:374/403 query:403 hit:399 align:404 bit:659.4	OK	Glyceraldehyde-3-phosphate dehydrogenase GAPA2, chloroplastic	NADP-dependent glyceraldehydephosphate dehydrogenase A subunit 2	G3PA2_ARATH	Q9LPW0	B3H4P2; C0Z2Y9	GAPA2	na	Arabidopsis thaliana (Mouse-ear cress)	3702
High	Master Protein	GLYMA_19G078900	K03231 - elongation factor 1-alpha (EEF1A) (1 of 8)	0	123.183	47	6	73	1	154	16.9	9.23	242.95	6	0	1.266	0.769703	75.11	88.3	111.7	32.22	54.17	High	High	High	High	High	High	1		3	3	Present Both	1	GLYMA_19G078900	GLYMA_19G078900	sp|Q8GTY0|EF1A4_ARATH	Elongation factor 1-alpha 4 GN=A4	ident:141/154 pos:148/154 query:154 hit:449 align:182 bit:271.6	Partial_match_hit	Elongation factor 1-alpha 4 (EF-1-alpha 4)	eEF-1A4	EF1A4_ARATH	Q8GTY0	P13905; Q0WSD5; Q39093; Q9C5L4	A4	na	Arabidopsis thaliana (Mouse-ear cress)	3702
High	Master Protein	GLYMA_09G114000	PTHR35284:SF1 - OUTER ENVELOPE PORE PROTEIN 24A, CHLOROPLASTIC-RELATED (1 of 2)	0	122.045	74	17	62	1	214	23.7	9.26	168.69	17	11	1.13	0.924565	49.93	97.2	102.8	10.91	25.53	Not Found	Not Found	Not Found	High	Not Found	Not Found	1		0	1	Missing Both	1	GLYMA_09G114000	GLYMA_09G114000	sp|Q8H0Y1|OP24B_ARATH	Outer envelope pore protein 24B, chloroplastic GN=OEP24B	ident:147/214 pos:179/214 query:214 hit:213 align:214 bit:318.5	OK	Outer envelope pore protein 24B, chloroplastic	Chloroplastic outer envelope pore protein of 24 kDa B	OP24B_ARATH	Q8H0Y1	A0MFL7; Q93XX9; Q9FMM2	OEP24B	na	Arabidopsis thaliana (Mouse-ear cress)	3702
High	Master Protein	GLYMA_11G202700	PTHR22904:SF373 - PROTEIN TIC 40, CHLOROPLASTIC (1 of 2)	0	121.629	32	14	50	3	429	47.1	6.81	141.91	14	0	0.571	0.332912	40.12	124.1	75.9	104.08	138.67	Peak Found	Peak Found	Peak Found	High	High	High	1		3	3	Present Both	1	GLYMA_11G202700	GLYMA_11G202700	sp|Q9FMD5|TIC40_ARATH	Protein TIC 40, chloroplastic GN=TIC40	ident:222/429 pos:267/429 query:429 hit:447 align:396 bit:386.0	OK	Protein TIC 40, chloroplastic	Protein PIGMENT DEFECTIVE EMBRYO 120; Translocon at the inner envelope membrane of chloroplasts 40 (AtTIC40)	TIC40_ARATH	Q9FMD5	na	TIC40	PDE120	Arabidopsis thaliana (Mouse-ear cress)	3702
High	Master Protein	GLYMA_04G226400	PTHR10264:SF27 - STOMATIN-LIKE PROTEIN 2, MITOCHONDRIAL (1 of 2)	0	121.459	39	13	44	5	404	43.9	9.11	137.71	13	9	0.894	0.963822	47.37	105.3	94.7	41.09	13.72	High	High	High	High	High	High	1		3	3	Present Both	1	GLYMA_04G226400	GLYMA_04G226400	sp|Q9SRH6|HIR3_ARATH	Hypersensitive-induced response protein 3 GN=HIR3	ident:54/404 pos:100/404 query:404 hit:285 align:193 bit:73.2	Partial_match_query	Hypersensitive-induced response protein 3 (AtHIR3)	na	HIR3_ARATH	Q9SRH6	na	HIR3	P31	Arabidopsis thaliana (Mouse-ear cress)	3702
High	Master Protein	GLYMA_11G091800	K03939 - NADH dehydrogenase (ubiquinone) Fe-S protein 6 (NDUFS6) (1 of 2)	0	120.486	24	4	50	4	105	11.7	7.43	213.34	4	0	1.528	0.483493	76.62	64.2	135.8	46.85	44.54	High	High	High	High	High	High	1		3	3	Present Both	1	GLYMA_11G091800	GLYMA_11G091800	sp|Q9M9M6|NDUS6_ARATH	NADH dehydrogenase [ubiquinone] iron-sulfur protein 6, mitochondrial GN=NDL2	ident:77/105 pos:90/105 query:105 hit:110 align:113 bit:157.9	OK	NADH dehydrogenase [ubiquinone] iron-sulfur protein 6, mitochondrial	na	NDUS6_ARATH	Q9M9M6	Q41901	OrderedLocusNames=At3g03070	na	Arabidopsis thaliana (Mouse-ear cress)	3702
High	Master Protein	GLYMA_05G048000	K02113 - F-type H+-transporting ATPase subunit delta (ATPF1D, atpH) (1 of 2)	0	119.533	38	11	78	2	248	26.8	7.56	251.54	11	10	0.918	0.974214	55.19	90.9	109.1	45.86	27.68	High	High	High	High	Peak Found	High	1		3	3	Present Both	1	GLYMA_05G048000	GLYMA_05G048000	sp|Q9SSS9|ATPD_ARATH	ATP synthase subunit delta, chloroplastic GN=ATPD	ident:153/248 pos:188/248 query:248 hit:234 align:249 bit:282.0	OK	ATP synthase subunit delta, chloroplastic	ATP synthase F(1) sector subunit delta; F-type ATPase subunit delta	ATPD_ARATH	Q9SSS9	Q8RY87	ATPD	na	Arabidopsis thaliana (Mouse-ear cress)	3702
High	Master Protein	GLYMA_09G173500	K17081 - prohibitin 2 (PHB2) (1 of 4)	0	118.635	53	13	58	3	289	31.8	9.72	208.57	13	10	1.191	0.858577	75.48	81.6	118.4	44.28	59.23	High	High	High	High	High	High	1		3	3	Present Both	1	GLYMA_09G173500	GLYMA_09G173500	sp|Q9ZNT7|PHB2_ARATH	Prohibitin-2, mitochondrial GN=PHB2	ident:236/289 pos:268/289 query:289 hit:286 align:282 bit:480.7	OK	Prohibitin-2, mitochondrial (Atphb2)	na	PHB2_ARATH	Q9ZNT7	F4I2J2	PHB2	na	Arabidopsis thaliana (Mouse-ear cress)	3702
High	Master Protein	GLYMA_20G231600	PTHR30373:SF2 - UPF0603 PROTEIN YGCG (1 of 2)	0	117.609	43	14	59	2	293	31.8	8.73	213.2	14	10	0.852	0.933667	32.22	116.2	83.8	11.63	19.16	High	Peak Found	High	High	Peak Found	High	1		3	3	Present Both	1	GLYMA_20G231600	GLYMA_20G231600	sp|Q9ZVL6|U603_ARATH	UPF0603 protein At1g54780, chloroplastic GN=U2AF35B	ident:217/293 pos:246/293 query:293 hit:285 align:294 bit:401.7	OK	UPF0603 protein At1g54780, chloroplastic	Thylakoid lumen 18.3 kDa protein	U603_ARATH	Q9ZVL6	na	OrderedLocusNames=At1g54780	na	Arabidopsis thaliana (Mouse-ear cress)	3702
High	Master Protein	GLYMA_13G167800	K12845 - U4/U6 small nuclear ribonucleoprotein SNU13 (SNU13, NHP2L) (1 of 4)	0	117.562	52	7	34	2	153	16.6	7.87	137.19	7	5	1.823	0.201232	55.91	78.4	121.6	6.63	55.88	High	Peak Found	High	High	High	High	1		3	3	Present Both	1	GLYMA_13G167800	GLYMA_13G167800	sp|Q9LEY9|NHP2_ARATH	H/ACA ribonucleoprotein complex subunit 2-like protein GN=NHL6	ident:49/153 pos:74/153 query:153 hit:156 align:133 bit:89.0	Poor_match	H/ACA ribonucleoprotein complex subunit 2-like protein	Nhp2-like protein	NHP2_ARATH	Q9LEY9	na	OrderedLocusNames=At5g08180	na	Arabidopsis thaliana (Mouse-ear cress)	3702
High	Master Protein	GLYMA_11G117600	PF00076 - RNA recognition motif. (a.k.a. RRM, RBD, or RNP domain) (RRM_1) (1 of 477)	0	117.342	49	10	40	8	170	16.9	8.12	162.63	10	0	1.355	0.662951	86.73	71.1	128.9	29.45	58.63	High	High	High	High	High	High	1		3	3	Present Both	1	GLYMA_11G117600	GLYMA_11G117600	sp|Q03250|RBG7_ARATH	Glycine-rich RNA-binding protein 7 GN=RBG7	ident:66/170 pos:76/170 query:170 hit:176 align:85 bit:142.1	Partial_match_both	Glycine-rich RNA-binding protein 7 (AtGR-RBP7)	AtRBG7; Glycine-rich protein 7 (AtGRP7); Protein COLD, CIRCADIAN RHYTHM, AND RNA BINDING 2 (Protein CCR2)	RBG7_ARATH	Q03250	C0Z304; Q8LEV4; Q94B62	RBG7	CCR2; GR-RBP7; GRP7	Arabidopsis thaliana (Mouse-ear cress)	3702
High	Master Protein	GLYMA_08G151700	KOG0131 - Splicing factor 3b, subunit 4 (1 of 43)	0	117.242	37	9	42	2	270	29.7	9.35	137.25	9	0	0.526	0.230952	20.2	131.1	68.9	3.76	63.84	High	High	Not Found	High	Not Found	Peak Found	1		2	2	Present Both	1	GLYMA_08G151700	GLYMA_08G151700	sp|Q8VYM4|PSRP2_ARATH	30S ribosomal protein 2, chloroplastic GN=PSRP2	ident:138/270 pos:163/270 query:270 hit:253 align:180 bit:293.5	OK	30S ribosomal protein 2, chloroplastic	Chloroplastic small ribosomal subunit protein cS22; Plastid-specific 30S ribosomal protein 2, chloroplastic (PSRP-2)	PSRP2_ARATH	Q8VYM4	B9DG26; Q9SUZ0	PSRP2	na	Arabidopsis thaliana (Mouse-ear cress)	3702
High	Master Protein	GLYMA_12G026900	PTHR32010:SF6 - PHOTOSYSTEM II STABILITY/ASSEMBLY FACTOR HCF136, CHLOROPLASTIC (1 of 3)	0	117.224	43	14	45	14	393	43.3	7.4	145.49	14	0	0.666	0.596219	29.94	131.5	68.5	14.79	23.22	High	High	High	High	High	High	1		3	3	Present Both	1	GLYMA_12G026900	GLYMA_12G026900	sp|O82660|P2SAF_ARATH	Photosystem II stability/assembly factor HCF136, chloroplastic GN=HCF136	ident:316/393 pos:358/393 query:393 hit:403 align:406 bit:611.3	OK	Photosystem II stability/assembly factor HCF136, chloroplastic	na	P2SAF_ARATH	O82660	Q56Z72	HCF136	na	Arabidopsis thaliana (Mouse-ear cress)	3702
High	Master Protein	GLYMA_08G020600	K02150 - V-type H+-transporting ATPase subunit E (ATPeV1E, ATP6E) (1 of 7)	0	116.535	37	13	36	4	238	27.6	6.76	116.44	13	8	0.86	0.941929	55.87	143.6	56.4	29.68	87.7	High	High	High	High	Peak Found	High	1	Acetyl [N-Term]	3	3	Present Both	1	GLYMA_08G020600	GLYMA_08G020600	sp|P0CAN7|VATE3_ARATH	V-type proton ATPase subunit E3 GN=VHA-E3	ident:172/238 pos:202/238 query:238 hit:237 align:238 bit:352.4	OK	V-type proton ATPase subunit E3 (V-ATPase subunit E3)	Vacuolar H(+)-ATPase subunit E isoform 3; Vacuolar proton pump subunit E3	VATE3_ARATH	P0CAN7	Q9SH70	VHA-E3	na	Arabidopsis thaliana (Mouse-ear cress)	3702
High	Master Protein	GLYMA_10G014700	K09584 - protein disulfide-isomerase A6 (PDIA6, TXNDC7) (1 of 6)	0	116	38	16	36	2	364	40.3	5.92	98.53	16	0	1.288	0.967807	61.6	70.8	129.2	85.91	86.61	Peak Found	Peak Found	Peak Found	Peak Found	Peak Found	High	1		3	3	Present Both	1	GLYMA_10G014700	GLYMA_10G014700	sp|O22263|PDI21_ARATH	Protein disulfide-isomerase like 2-1 GN=PDIL2-1	ident:262/364 pos:295/364 query:364 hit:361 align:332 bit:551.2	OK	Protein disulfide-isomerase like 2-1 (AtPDIL2-1)	P5; Protein MATERNAL EFFECT EMBRYO ARREST 30; Protein UNFERTILIZED EMBRYO SAC 5; Protein disulfide isomerase 11 (AtPDI11); Protein disulfide-isomerase A6; Protein disulfide-isomerase like 4-1 (AtPDIL4-1)	PDI21_ARATH	O22263	Q546R3	PDIL2-1	MEE30; PDI11; PDIL4-1; UNE5	Arabidopsis thaliana (Mouse-ear cress)	3702
High	Master Protein	GLYMA_03G226600	PTHR24031:SF155 - DEAD-BOX ATP-DEPENDENT RNA HELICASE 3, CHLOROPLASTIC (1 of 4)	0	115.422	24	15	47	5	771	83.9	7.23	134.07	15	10	0.906	0.970535	29.2	113	87	26.66	35.74	High	High	High	High	Peak Found	Peak Found	1		3	3	Present Both	1	GLYMA_03G226600	GLYMA_03G226600	sp|Q8L7S8|RH3_ARATH	DEAD-box ATP-dependent RNA helicase 3, chloroplastic GN=RH3	ident:492/771 pos:565/771 query:771 hit:748 align:661 bit:949.5	OK	DEAD-box ATP-dependent RNA helicase 3, chloroplastic	Protein EMBRYO DEFECTIVE 1138	RH3_ARATH	Q8L7S8	O65255; Q0WMJ9; Q8LPE9; Q8RUW1; Q9SB96	RH3	EMB1138	Arabidopsis thaliana (Mouse-ear cress)	3702
High	Master Protein	GLYMA_07G200300	PTHR11527:SF158 - 17.6 KDA CLASS I HEAT SHOCK PROTEIN 1-RELATED (1 of 20)	0	115.112	56	10	50	1	153	17.5	5.99	180.04	10	0	4.536	0.0169903	99.56	36.1	163.9	50.3	90.49	High	High	Not Found	High	High	High	1		2	3	Present Both	1	GLYMA_07G200300	GLYMA_07G200300	sp|Q9LNW0|HS178_ARATH	17.8 kDa class I heat shock protein GN=HSP17.8	ident:118/153 pos:135/153 query:153 hit:157 align:157 bit:234.6	OK	17.8 kDa class I heat shock protein	17.8 kDa heat shock protein (AtHsp17.8)	HS178_ARATH	Q9LNW0	na	HSP17.8	na	Arabidopsis thaliana (Mouse-ear cress)	3702
High	Master Protein	GLYMA_13G350800		0	115.036	39	13	47	1	329	37.3	8.97	131.77	13	12	0.723	0.725051	26.03	126	74	63.75	39.76	High	High	Not Found	High	Peak Found	Not Found	1		2	2	Present Both	1	GLYMA_13G350800	GLYMA_13G350800	sp|Q9C717|FLXL3_ARATH	Protein FLX-like 3 GN=FLXL3	ident:147/329 pos:198/329 query:329 hit:283 align:289 bit:251.1	Poor_match	Protein FLX-like 3 (AtFLXL3)	na	FLXL3_ARATH	Q9C717	Q9C887	FLXL3	FLL3	Arabidopsis thaliana (Mouse-ear cress)	3702
High	Master Protein	GLYMA_07G114900	K02926 - large subunit ribosomal protein L4 (RP-L4, MRPL4, rplD) (1 of 6)	0	114.637	43	15	56	3	303	33.2	8.06	180.93	15	0	1.826	0.199531	108.6	114.4	85.6	59.29	79.87	High	High	High	High	High	High	1		3	3	Present Both	1	GLYMA_07G114900	GLYMA_07G114900	sp|O50061|RK4_ARATH	50S ribosomal protein L4, chloroplastic GN=RPL4	ident:167/303 pos:196/303 query:303 hit:282 align:224 bit:322.8	OK	50S ribosomal protein L4, chloroplastic	CL4; R-protein L4	RK4_ARATH	O50061	Q8LF27; Q8VZS1; Q9LNV1	RPL4	na	Arabidopsis thaliana (Mouse-ear cress)	3702
High	Master Protein	GLYMA_10G157100	PTHR30373:SF2 - UPF0603 PROTEIN YGCG (1 of 2)	0	114.111	43	13	55	1	293	31.7	8.31	204.68	13	0	0.972	0.99115	19.43	101.4	98.6	9.88	20.82	Peak Found	Peak Found	Not Found	Not Found	High	High	1		2	2	Present Both	1	GLYMA_10G157100	GLYMA_10G157100	sp|Q9ZVL6|U603_ARATH	UPF0603 protein At1g54780, chloroplastic GN=U2AF35B	ident:218/293 pos:247/293 query:293 hit:285 align:294 bit:404.4	OK	UPF0603 protein At1g54780, chloroplastic	Thylakoid lumen 18.3 kDa protein	U603_ARATH	Q9ZVL6	na	OrderedLocusNames=At1g54780	na	Arabidopsis thaliana (Mouse-ear cress)	3702
High	Master Protein	GLYMA_08G104300	1.6.99.3 - NADH dehydrogenase / Type I dehydrogenase (1 of 23)	0	113.346	66	8	50	8	91	11.2	8.18	223.83	8	0	1.144	0.910669	33.06	103.5	96.5	2.34	10.72	High	High	High	High	High	High	1		3	3	Present Both	1	GLYMA_08G104300	GLYMA_08G104300	sp|Q9SS87|SEOB_ARATH	Protein SIEVE ELEMENT OCCLUSION B GN=SEOB	ident:20/91 pos:32/91 query:91 hit:740 align:66 bit:30.4	Partial_match_hit	Protein SIEVE ELEMENT OCCLUSION B (AtSEOb)	Protein SIEVE ELEMENT OCCLUSION-RELATED 1 (AtSEOR1)	SEOB_ARATH	Q9SS87	na	SEOB	na	Arabidopsis thaliana (Mouse-ear cress)	3702
High	Master Protein	GLYMA_02G138600		0	112.823	30	7	44	7	160	17.2	10.58	198.82	7	0	0.81	0.879928	54.87	120.6	79.4	4.67	103.62	High	High	High	High	High	High	1		3	3	Present Both	1	GLYMA_02G138600	GLYMA_02G138600	sp|Q9LPC5|BIG3_ARATH	Brefeldin A-inhibited guanine nucleotide-exchange protein 3 GN=BIG3	ident:16/160 pos:17/160 query:160 hit:1750 align:31 bit:28.9	Partial_match_both	Brefeldin A-inhibited guanine nucleotide-exchange protein 3 (BIG3)	ARF guanine-nucleotide exchange factor BIG3; Protein EMBRYO SAC DEVELOPMENT ARREST 10	BIG3_ARATH	Q9LPC5	na	BIG3	EDA10	Arabidopsis thaliana (Mouse-ear cress)	3702
High	Master Protein	GLYMA_08G196500	K02903 - large subunit ribosomal protein L28e (RP-L28e, RPL28) (1 of 4)	0	110.898	60	17	58	3	150	16.9	10.93	189.49	17	13	1.101	0.944471	79.43	66.4	133.6	83.39	46.07	Peak Found	Peak Found	High	High	Peak Found	High	1		3	3	Present Both	1	GLYMA_08G196500	GLYMA_08G196500	sp|Q9M0E2|RL282_ARATH	60S ribosomal protein L28-2 GN=RPL28C	ident:103/150 pos:122/150 query:150 hit:143 align:142 bit:218.8	OK	60S ribosomal protein L28-2	na	RL282_ARATH	Q9M0E2	na	RPL28C	na	Arabidopsis thaliana (Mouse-ear cress)	3702
High	Master Protein	GLYMA_14G215200	PTHR11467//PTHR11467:SF49 - HISTONE H1/H5 // SUBFAMILY NOT NAMED (1 of 6)	0	110.545	64	10	41	2	176	18.9	10.26	125.62	10	9	0.904	0.969121	49.14	98.4	101.6	56.86	65.28	High	High	Not Found	High	Peak Found	Not Found	1	Phospho [S122]	2	2	Present Both	1	GLYMA_14G215200	GLYMA_14G215200	sp|Q43386|HMGYA_ARATH	HMG-Y-related protein A GN=HMGA	ident:80/176 pos:107/176 query:176 hit:204 align:177 bit:129.0	Poor_match	HMG-Y-related protein A (AtHMGA)	High mobility group A protein	HMGYA_ARATH	Q43386	P92954; Q8LGC1	HMGA	na	Arabidopsis thaliana (Mouse-ear cress)	3702
High	Master Protein	GLYMA_12G002100	PTHR11695:SF507 - QUINONE-OXIDOREDUCTASE HOMOLOG, CHLOROPLASTIC-RELATED (1 of 4)	0	110.48	45	15	36	14	328	34.8	8.19	109.75	15	1	0.907	0.970587	51.22	124.7	75.3	75.03	54.63	High	High	High	High	High	High	1	Acetyl [N-Term]	3	3	Present Both	1	GLYMA_12G002100	GLYMA_12G002100	sp|Q9SV68|QORH_ARATH	Chloroplast envelope quinone oxidoreductase homolog GN=CEQORH	ident:232/328 pos:278/328 query:328 hit:329 align:326 bit:473.4	OK	Chloroplast envelope quinone oxidoreductase homolog (ceQORH)	na	QORH_ARATH	Q9SV68	na	CEQORH	na	Arabidopsis thaliana (Mouse-ear cress)	3702
High	Master Protein	GLYMA_12G027400	K11294 - nucleolin (NCL, NSR1) (1 of 11)	0	109.681	18	12	47	6	744	77.5	5.49	186.87	12	6	1.148	0.906801	49.14	88.8	111.2	36.12	15.04	High	High	High	High	High	High	1		3	3	Present Both	1	GLYMA_12G027400	GLYMA_12G027400	sp|Q1PEP5|NUCL2_ARATH	Nucleolin 2 GN=NUCL2	ident:143/744 pos:190/744 query:744 hit:636 align:312 bit:252.3	Partial_match_both	Nucleolin 2	Protein NUCLEOLIN LIKE 2 (AtNUC-L2); Protein PARALLEL LIKE 1 (AtPARLL1)	NUCL2_ARATH	Q1PEP5	Q9LIH8	NUCL2	PARLL1	Arabidopsis thaliana (Mouse-ear cress)	3702
High	Master Protein	GLYMA_03G060300	PTHR21649:SF6 - CHLOROPHYLL A-B BINDING PROTEIN CP29.1, CHLOROPLASTIC-RELATED (1 of 2)	0	108.708	40	9	56	2	290	31.4	6.32	195.49	9	6	0.743	0.740874	27.97	123.1	76.9	32.86	10.79	High	High	High	High	High	High	1		3	3	Present Both	1	GLYMA_03G060300	GLYMA_03G060300	sp|Q9XF88|CB4B_ARATH	Chlorophyll a-b binding protein CP29.2, chloroplastic GN=LHCB4.2	ident:238/290 pos:254/290 query:290 hit:287 align:279 bit:482.6	OK	Chlorophyll a-b binding protein CP29.2, chloroplastic	LHCB4.2; LHCII protein 4.2	CB4B_ARATH	Q9XF88	na	LHCB4.2	na	Arabidopsis thaliana (Mouse-ear cress)	3702
High	Master Protein	GLYMA_14G141000	PTHR31236:SF2 - DEHYDRATION-RESPONSIVE PROTEIN RD22 (1 of 11)	0	107.767	26	10	34	6	367	39.6	8.35	114.14	10	4	0.397	0.0218731	15.03	171.5	28.5	38.38	90.18	High	High	High	High	Peak Found	High	1		3	3	Present Both	1	GLYMA_14G141000	GLYMA_14G141000	sp|Q08298|RD22_ARATH	BURP domain protein RD22 GN=RD22	ident:210/367 pos:261/367 query:367 hit:392 align:387 bit:372.5	OK	BURP domain protein RD22	Dehydration-responsive protein RD22	RD22_ARATH	Q08298	Q56WL9	RD22	na	Arabidopsis thaliana (Mouse-ear cress)	3702
High	Master Protein	GLYMA_07G084100	PTHR10430 - PEROXIREDOXIN (1 of 9)	0	106.813	37	8	53	8	162	17.4	5.59	199.27	8	0	1.428	0.596219	57.14	74.9	125.1	26.54	20.37	High	High	High	High	High	High	1		3	3	Present Both	1	GLYMA_07G084100	GLYMA_07G084100	sp|Q9XEX2|PRX2B_ARATH	Peroxiredoxin-2B GN=PRXIIB	ident:126/162 pos:149/162 query:162 hit:162 align:162 bit:273.9	OK	Peroxiredoxin-2B	Peroxiredoxin IIB; Peroxiredoxin TPx1; Thioredoxin peroxidase 2B; Thioredoxin-dependent peroxidase 1	PRX2B_ARATH	Q9XEX2	na	PRXIIB	TPX1	Arabidopsis thaliana (Mouse-ear cress)	3702
High	Master Protein	GLYMA_15G023600		0	106.639	45	13	43	1	289	32.7	8.98	119.76	13	0	0.587	0.509673	11.77	126	74	2.13	32.24	High	Peak Found	Not Found	Peak Found	Peak Found	Not Found	1		2	2	Present Both	1	GLYMA_15G023600	GLYMA_15G023600	sp|Q9C717|FLXL3_ARATH	Protein FLX-like 3 GN=FLXL3	ident:145/289 pos:196/289 query:289 hit:283 align:293 bit:251.5	Poor_match	Protein FLX-like 3 (AtFLXL3)	na	FLXL3_ARATH	Q9C717	Q9C887	FLXL3	FLL3	Arabidopsis thaliana (Mouse-ear cress)	3702
High	Master Protein	GLYMA_01G080200	K01527 - nascent polypeptide-associated complex subunit beta (EGD1, BTF3) (1 of 4)	0	106.421	61	8	40	4	159	17.4	6.6	182.47	8	0	1.134	0.940311	91	108.7	91.3	77.26	90.78	High	High	Peak Found	High	High	Peak Found	1	Acetyl [N-Term]	3	3	Present Both	1	GLYMA_01G080200	GLYMA_01G080200	sp|Q9SMW7|BTF3_ARATH	Basic transcription factor 3 GN=BTF3	ident:123/159 pos:137/159 query:159 hit:165 align:151 bit:246.5	OK	Basic transcription factor 3 (AtBTF3)	Nascent polypeptide-associated complex subunit beta	BTF3_ARATH	Q9SMW7	Q93ZB5	BTF3	na	Arabidopsis thaliana (Mouse-ear cress)	3702
High	Master Protein	GLYMA_05G026300	PTHR11540:SF14 - MALATE DEHYDROGENASE, CHLOROPLASTIC (1 of 2)	0	105.831	46	11	43	6	413	43.6	6.92	143.01	11	0	1.52	0.567022	42.78	67.5	132.5	32.4	34.47	High	High	High	High	High	High	1		3	3	Present Both	1	GLYMA_05G026300	GLYMA_05G026300	sp|Q9SN86|MDHP_ARATH	Malate dehydrogenase, chloroplastic GN=IDN2	ident:302/413 pos:341/413 query:413 hit:403 align:403 bit:579.3	OK	Malate dehydrogenase, chloroplastic	Chloroplastic malate dehydrogenase (Chloroplastic MDH; cpNAD-MDH); Plastidic NAD-dependent malate dehydrogenase (pNAD-MDH)	MDHP_ARATH	Q9SN86	O81844	OrderedLocusNames=At3g47520	na	Arabidopsis thaliana (Mouse-ear cress)	3702
High	Master Protein	GLYMA_13G132100	K11252 - histone H2B (H2B) (1 of 16)	0	105.485	65	11	63	1	139	15.4	10.08	205.69	11	0	1.896	0.454856	77.09	69.1	130.9	25.91	77.52	High	High	High	High	High	Peak Found	1		3	3	Present Both	1	GLYMA_13G132100	GLYMA_13G132100	sp|Q9ZUS0|H2B4_ARATH	Histone H2B.4 GN=F6'H2	ident:126/139 pos:132/139 query:139 hit:138 align:139 bit:228.4	OK	Histone H2B.4	HTB5	H2B4_ARATH	Q9ZUS0	na	OrderedLocusNames=At2g37470	na	Arabidopsis thaliana (Mouse-ear cress)	3702
High	Master Protein	GLYMA_15G218000.4.p	PTHR34267:SF1 - AT0ZI1 PROTEIN (1 of 4)	0	105.31	54	9	51	6	79	8.8	9.2	171.65	9	4	0.966	0.999087	48.18	103.9	96.1	13.41	21.57	High	High	Peak Found	High	High	High	1		3	3	Present Both	1	GLYMA_15G218000.4.p	GLYMA_15G218000.4.p	sp|O81020|NPC2_ARATH	Non-specific phospholipase C2 GN=NPC2	ident:17/79 pos:22/79 query:79 hit:514 align:46 bit:27.3	Partial_match_hit	Non-specific phospholipase C2	na	NPC2_ARATH	O81020	na	NPC2	na	Arabidopsis thaliana (Mouse-ear cress)	3702
High	Master Protein	GLYMA_11G141500	K12881 - THO complex subunit 4 (THOC4, ALY) (1 of 5)	0	104.624	50	11	45	7	247	26.2	10.1	175.33	11	4	1.047	0.97325	38.12	89.8	110.2	39.93	50.99	High	High	High	High	High	High	1		3	3	Present Both	1	GLYMA_11G141500	GLYMA_11G141500	sp|Q8L773|THO4A_ARATH	THO complex subunit 4A GN=ALY1	ident:146/247 pos:179/247 query:247 hit:244 align:250 bit:232.6	OK	THO complex subunit 4A	ALYREF homolog 1 (AtALY1)	THO4A_ARATH	Q8L773	Q8LCA6; Q9FJE1	ALY1	THO4A	Arabidopsis thaliana (Mouse-ear cress)	3702
High	Master Protein	GLYMA_13G176500	PTHR11527:SF158 - 17.6 KDA CLASS I HEAT SHOCK PROTEIN 1-RELATED (1 of 20)	0	104.162	64	11	42	3	152	17.4	7.5	152.76	11	0	7.543	0.000398816	149.71	23.4	176.6		100.49	High	High	Not Found	High	Peak Found	High	1		2	3	Present Both	1	GLYMA_13G176500	GLYMA_13G176500	sp|P13853|HS17C_ARATH	17.6 kDa class I heat shock protein 3 GN=HSP17.6C	ident:102/152 pos:128/152 query:152 hit:157 align:160 bit:201.1	OK	17.6 kDa class I heat shock protein 3	17.6 kDa heat shock protein 3 (AtHsp17.6C)	HS17C_ARATH	P13853	Q29Q59; Q9C8L3	HSP17.6C	na	Arabidopsis thaliana (Mouse-ear cress)	3702
High	Master Protein	GLYMA_12G222200	K00218 - protochlorophyllide reductase (E1.3.1.33, por) (1 of 2)	0	104.084	27	11	47	10	399	43.2	8.78	185.34	11	1	0.829	0.906801	24.49	120.8	79.2	18.85	6.21	High	High	High	High	High	High	1		3	3	Present Both	1	GLYMA_12G222200	GLYMA_12G222200	sp|Q42536|PORA_ARATH	Protochlorophyllide reductase A, chloroplastic GN=PORA	ident:334/399 pos:368/399 query:399 hit:405 align:405 bit:689.1	OK	Protochlorophyllide reductase A, chloroplastic (PCR A)	NADPH-protochlorophyllide oxidoreductase A (POR A)	PORA_ARATH	Q42536	B9DGY6; Q9FK22	PORA	na	Arabidopsis thaliana (Mouse-ear cress)	3702
High	Master Protein	GLYMA_07G091500	PTHR13094 - NADH-UBIQUINONE OXIDOREDUCTASE PDSW SUBUNIT (1 of 2)	0	103.994	79	11	64	5	106	12.5	8.02	201.24	11	6	0.972	0.999087	44.45	95.8	104.2	25.85	26.33	High	High	High	High	High	High	1		3	3	Present Both	1	GLYMA_07G091500	GLYMA_07G091500	sp|Q94C12|NDBAB_ARATH	NADH dehydrogenase [ubiquinone] 1 beta subcomplex subunit 10-B GN=NDC1	ident:84/106 pos:93/106 query:106 hit:106 align:106 bit:177.6	OK	NADH dehydrogenase [ubiquinone] 1 beta subcomplex subunit 10-B	na	NDBAB_ARATH	Q94C12	Q9LS49	OrderedLocusNames=At3g18410	na	Arabidopsis thaliana (Mouse-ear cress)	3702
High	Master Protein	GLYMA_09G139200	PF03766 - Remorin, N-terminal region (Remorin_N) (1 of 8)	0	103.845	50	13	42	4	206	22.5	5.82	111.07	13	6	0.773	0.806958	33.78	109.6	90.4	14.01	41.79	High	High	High	High	Peak Found	High	1		3	3	Present Both	1	GLYMA_09G139200	GLYMA_09G139200	sp|Q9M2D8|Y3126_ARATH	Uncharacterized protein At3g61260 GN=CBSDUF4	ident:113/206 pos:132/206 query:206 hit:212 align:168 bit:203.0	OK	Uncharacterized protein At3g61260	na	Y3126_ARATH	Q9M2D8	na	OrderedLocusNames=At3g61260	na	Arabidopsis thaliana (Mouse-ear cress)	3702
High	Master Protein	GLYMA_18G222200	PTHR32382:SF5 - FASCICLIN-LIKE ARABINOGALACTAN PROTEIN 10-RELATED (1 of 2)	0	103.569	31	12	44	4	416	42.5	6.34	146.48	12	8	0.848	0.928237	40.25	110.6	89.4	31.18	22.18	High	High	High	High	High	High	1		3	3	Present Both	1	GLYMA_18G222200	GLYMA_18G222200	sp|O22126|FLA8_ARATH	Fasciclin-like arabinogalactan protein 8 GN=FLA8	ident:262/416 pos:325/416 query:416 hit:420 align:408 bit:476.9	OK	Fasciclin-like arabinogalactan protein 8 (AtAGP8)	na	FLA8_ARATH	O22126	Q56ZW9; Q8L9B1; Q9FR46	FLA8	na	Arabidopsis thaliana (Mouse-ear cress)	3702
High	Master Protein	GLYMA_02G305400	K08913 - light-harvesting complex II chlorophyll a/b binding protein 2 (LHCB2) (1 of 2)	0	103.239	46	9	49	4	265	28.6	5.66	166.04	9	0	0.34	0.0036546	6.83	154.2	45.8	55.79	23.49	High	High	High	High	High	High	1		3	3	Present Both	1	GLYMA_02G305400	GLYMA_02G305400	sp|Q9SHR7|CB21_ARATH	Chlorophyll a-b binding protein 2.1, chloroplastic GN=LHCB2.1	ident:237/265 pos:252/265 query:265 hit:265 align:265 bit:498.0	OK	Chlorophyll a-b binding protein 2.1, chloroplastic	Photosystem II light harvesting complex gene 2.1; Protein LIGHT-HARVESTING CHLOROPHYLL B-BINDING 2.1	CB21_ARATH	Q9SHR7	Q9SYW9; Q9XF86	LHCB2.1	na	Arabidopsis thaliana (Mouse-ear cress)	3702
High	Master Protein	GLYMA_10G128100	K11353 - NADH dehydrogenase (ubiquinone) 1 alpha subcomplex subunit 13 (NDUFA13) (1 of 1)	0	101.847	55	9	25	9	143	16.2	9.52	85.75	9	0	1.357	0.659496	53.83	87.8	112.2	42.98	35.63	High	High	High	High	High	High	1		3	3	Present Both	1	GLYMA_10G128100	GLYMA_10G128100	sp|O49313|NDADB_ARATH	NADH dehydrogenase [ubiquinone] 1 alpha subcomplex subunit 13-B GN=NDA2	ident:124/143 pos:135/143 query:143 hit:143 align:143 bit:261.9	OK	NADH dehydrogenase [ubiquinone] 1 alpha subcomplex subunit 13-B	na	NDADB_ARATH	O49313	na	OrderedLocusNames=At2g33220	na	Arabidopsis thaliana (Mouse-ear cress)	3702
High	Master Protein	GLYMA_12G207500	K17081 - prohibitin 2 (PHB2) (1 of 4)	0	100.57	46	11	52	1	336	37.1	9.63	191.71	11	0	6.247	0.000139918	56.37	27.6	172.4	123.48		Peak Found	Peak Found	High	High	Not Found	High	1		3	2	Present Both	1	GLYMA_12G207500	GLYMA_12G207500	sp|Q9ZNT7|PHB2_ARATH	Prohibitin-2, mitochondrial GN=PHB2	ident:236/336 pos:267/336 query:336 hit:286 align:282 bit:477.6	OK	Prohibitin-2, mitochondrial (Atphb2)	na	PHB2_ARATH	Q9ZNT7	F4I2J2	PHB2	na	Arabidopsis thaliana (Mouse-ear cress)	3702
High	Master Protein	GLYMA_10G237000	PTHR10281:SF45 - MEMBRANE STEROID-BINDING PROTEIN 1-RELATED (1 of 5)	0	100.029	35	6	28	3	235	25.9	5.11	104.18	6	5	0.841	0.92428	20.87	115.8	84.2	32.18	36.73	High	High	Not Found	High	Not Found	High	1		2	2	Present Both	1	GLYMA_10G237000	GLYMA_10G237000	sp|Q9XFM6|MSBP1_ARATH	Membrane steroid-binding protein 1 GN=MSBP1	ident:142/235 pos:163/235 query:235 hit:220 align:215 bit:277.7	OK	Membrane steroid-binding protein 1 (AtMP1)	Membrane-associated progesterone-binding protein 5 (AtMAPR5)	MSBP1_ARATH	Q9XFM6	Q9LTJ7	MSBP1	MAPR5 MP1	Arabidopsis thaliana (Mouse-ear cress)	3702
High	Master Protein	GLYMA_06G138500	PTHR10264:SF27 - STOMATIN-LIKE PROTEIN 2, MITOCHONDRIAL (1 of 2)	0	99.893	26	11	47	3	404	44	9.2	140.82	11	0	0.877	0.954404	28.75	114.6	85.4	71.33	36.61	High	High	High	High	High	High	1		3	3	Present Both	1	GLYMA_06G138500	GLYMA_06G138500	sp|Q9SRH6|HIR3_ARATH	Hypersensitive-induced response protein 3 GN=HIR3	ident:54/404 pos:100/404 query:404 hit:285 align:193 bit:72.8	Partial_match_query	Hypersensitive-induced response protein 3 (AtHIR3)	na	HIR3_ARATH	Q9SRH6	na	HIR3	P31	Arabidopsis thaliana (Mouse-ear cress)	3702
High	Master Protein	GLYMA_12G179100	K11252 - histone H2B (H2B) (1 of 16)	0	99.606	67	11	59	1	134	14.7	10.08	181.48	11	0	0.01	1.22204e-16		200		2.57		High	Peak Found	Not Found	Not Found	Not Found	Not Found	1		2	0	Only Control	1	GLYMA_12G179100	GLYMA_12G179100	sp|P40283|H2B11_ARATH	Histone H2B.11 GN=FAB1D	ident:119/134 pos:125/134 query:134 hit:150 align:133 bit:220.3	OK	Histone H2B.11	HTB4	H2B11_ARATH	P40283	Q5PP00; Q8LDE5; Q9FJE5	OrderedLocusNames=At5g59910	na	Arabidopsis thaliana (Mouse-ear cress)	3702
High	Master Protein	GLYMA_13G136400	K02930 - large subunit ribosomal protein L4e (RP-L4e, RPL4) (1 of 4)	0	99.294	40	14	47	2	405	44.6	10.48	157.61	14	0	1.041	0.974214	25.94	96.5	103.5	16.75	7.95	High	High	High	High	High	High	1		3	3	Present Both	1	GLYMA_13G136400	GLYMA_13G136400	sp|Q9SF40|RL4A_ARATH	60S ribosomal protein L4-1 GN=RPL4A	ident:340/405 pos:378/405 query:405 hit:406 align:404 bit:700.7	OK	60S ribosomal protein L4-1 (L1)	na	RL4A_ARATH	Q9SF40	na	RPL4A	na	Arabidopsis thaliana (Mouse-ear cress)	3702
High	Master Protein	GLYMA_09G231200	PTHR33322:SF3 - BAG FAMILY MOLECULAR CHAPERONE REGULATOR 7 (1 of 2)	0	99.064	27	10	29	10	402	46.3	9.41	105.47	10	0	0.852	0.926957	25.35	155.5	44.5	69.99	70.69	High	High	High	High	Peak Found	High	1		3	3	Present Both	1	GLYMA_09G231200	GLYMA_09G231200	sp|Q9LVA0|BAG7_ARATH	BAG family molecular chaperone regulator 7 GN=BAG7	ident:203/402 pos:274/402 query:402 hit:446 align:457 bit:305.1	Poor_match	BAG family molecular chaperone regulator 7	Bcl-2-associated athanogene 7	BAG7_ARATH	Q9LVA0	na	BAG7	na	Arabidopsis thaliana (Mouse-ear cress)	3702
High	Master Protein	GLYMA_07G057200	K17525 - chitinase domain-containing protein 1 (CHID1) (1 of 4)	0	98.188	27	14	43	4	444	46.4	6.23	125.81	14	0	0.382	0.0196152	3.28	152	48	12.26	31.23	High	High	High	Peak Found	Peak Found	Peak Found	1		3	3	Present Both	1	GLYMA_07G057200	GLYMA_07G057200	sp|Q9M158|STR4_ARATH	Rhodanese-like domain-containing protein 4, chloroplastic GN=STR4	ident:260/444 pos:320/444 query:444 hit:466 align:468 bit:438.0	OK	Rhodanese-like domain-containing protein 4, chloroplastic	Protein THYLAKOID RHODANESE-LIKE; Sulfurtransferase 4 (AtStr4)	STR4_ARATH	Q9M158	O04623; Q0WWP1; Q93VZ2	STR4	na	Arabidopsis thaliana (Mouse-ear cress)	3702
High	Master Protein	GLYMA_13G127200	K08903 - photosystem II 13kDa protein (psb28) (1 of 2)	0	97.672	30	6	65	3	179	20.1	8.84	244.35	6	3	0.782	0.826647	35.04	116.3	83.7	15.04	15.63	High	High	High	High	High	High	1		3	3	Present Both	1	GLYMA_13G127200	GLYMA_13G127200	sp|Q8W0Y8|PSB28_ARATH	Photosystem II reaction center PSB28 protein, chloroplastic GN=PSB28	ident:109/179 pos:138/179 query:179 hit:183 align:182 bit:212.6	OK	Photosystem II reaction center PSB28 protein, chloroplastic	Photosystem II protein W-like	PSB28_ARATH	Q8W0Y8	Q9M0G6	PSB28	na	Arabidopsis thaliana (Mouse-ear cress)	3702
High	Master Protein	GLYMA_13G302900	1.10.9.1 - Plastoquinol--plastocyanin reductase / Cytochrome b6f complex (1 of 2)	0	97.602	44	9	43	3	227	24.2	8.37	160	9	0	0.949	0.990328	37.29	108.3	91.7	16.74	28.61	High	High	High	High	Peak Found	High	1		3	3	Present Both	1	GLYMA_13G302900	GLYMA_13G302900	sp|Q9ZR03|UCRIA_ARATH	Cytochrome b6-f complex iron-sulfur subunit, chloroplastic GN=petC	ident:172/227 pos:194/227 query:227 hit:229 align:231 bit:313.9	OK	Cytochrome b6-f complex iron-sulfur subunit, chloroplastic	Plastohydroquinone:plastocyanin oxidoreductase iron-sulfur protein; Proton gradient regulation protein 1; Rieske iron-sulfur protein (ISP; RISP)	UCRIA_ARATH	Q9ZR03	Q94EI4; Q9FYB6	petC	PGR1	Arabidopsis thaliana (Mouse-ear cress)	3702
High	Master Protein	GLYMA_15G158900	PTHR23076//PTHR23076:SF60 - METALLOPROTEASE M41 FTSH // SUBFAMILY NOT NAMED (1 of 4)	0	96.489	16	12	43	6	690	74.1	6.19	133.69	12	0	0.717	0.712101	27.65	130.2	69.8	15.3	15.59	High	High	High	High	High	High	1		3	3	Present Both	1	GLYMA_15G158900	GLYMA_15G158900	sp|Q8W585|FTSH8_ARATH	ATP-dependent zinc metalloprotease FTSH 8, chloroplastic GN=FTSH8	ident:581/690 pos:615/690 query:690 hit:685 align:685 bit:1135.5	OK	ATP-dependent zinc metalloprotease FTSH 8, chloroplastic (AtFTSH8)	na	FTSH8_ARATH	Q8W585	Q94AL5; Q9SHI8	FTSH8	na	Arabidopsis thaliana (Mouse-ear cress)	3702
High	Master Protein	GLYMA_14G215100	PTHR11467//PTHR11467:SF49 - HISTONE H1/H5 // SUBFAMILY NOT NAMED (1 of 6)	0	96.288	64	9	41	1	176	18.9	10.26	119.33	9	0	0.852	0.928237	4.86	108	92	1.13	6.43	High	High	Not Found	High	High	Not Found	1	Phospho [S122]	2	2	Present Both	1	GLYMA_14G215100	GLYMA_14G215100	sp|Q43386|HMGYA_ARATH	HMG-Y-related protein A GN=HMGA	ident:79/176 pos:107/176 query:176 hit:204 align:177 bit:127.1	Poor_match	HMG-Y-related protein A (AtHMGA)	High mobility group A protein	HMGYA_ARATH	Q43386	P92954; Q8LGC1	HMGA	na	Arabidopsis thaliana (Mouse-ear cress)	3702
High	Master Protein	GLYMA_06G071500	K11251 - histone H2A (H2A) (1 of 24)	0	96.236	53	9	43	2	136	14.4	10.32	166.73	9	0	2.114	0.482953	79.89	79.8	120.2	37.06	129.37	High	High	High	High	High	High	1		3	3	Present Both	1	GLYMA_06G071500	GLYMA_06G071500	sp|Q9C944|H2AV3_ARATH	Probable histone H2A variant 3 GN=FAB1C	ident:120/136 pos:129/136 query:136 hit:134 align:136 bit:222.2	OK	Probable histone H2A variant 3	H2A.F/Z 3; HTA9	H2AV3_ARATH	Q9C944	na	OrderedLocusNames=At1g52740	na	Arabidopsis thaliana (Mouse-ear cress)	3702
High	Master Protein	GLYMA_05G110100	K02266 - cytochrome c oxidase subunit 6a (COX6A) (1 of 2)	0	96.215	36	5	51	1	102	11.5	9.09	198.61	5	3	1.106	0.942547	41.48	103.8	96.2	16.01	31.42	High	High	High	High	High	High	1		3	3	Present Both	1	GLYMA_05G110100	GLYMA_05G110100	sp|Q9T070|COX6A_ARATH	Cytochrome c oxidase subunit 6a, mitochondrial GN=COX6A	ident:71/102 pos:83/102 query:102 hit:102 align:102 bit:156.4	OK	Cytochrome c oxidase subunit 6a, mitochondrial (AtCOX6a)	na	COX6A_ARATH	Q9T070	Q8L974	COX6A	na	Arabidopsis thaliana (Mouse-ear cress)	3702
High	Master Protein	GLYMA_20G025000		0	95.863	47	11	39	6	230	25.6	9.83	127.14	11	6	1.464	0.562659	74.82	83.5	116.5	20.36	37.2	High	High	High	High	Peak Found	High	1		3	3	Present Both	1	GLYMA_20G025000	GLYMA_20G025000	sp|Q84K90|RHIP1_ARATH	RGS1-HXK1-interacting protein 1 GN=RHIP1	ident:114/230 pos:167/230 query:230 hit:263 align:203 bit:235.7	Poor_match	RGS1-HXK1-interacting protein 1	na	RHIP1_ARATH	Q84K90	O65593	RHIP1	na	Arabidopsis thaliana (Mouse-ear cress)	3702
High	Master Protein	GLYMA_13G357300	K02695 - photosystem I subunit VI (psaH) (1 of 5)	0	95.469	59	7	47	4	139	14.8	9.99	206.19	7	0	2.021	0.100376	93.45	88.8	111.2	59.02	39.4	High	High	High	High	High	High	1		3	3	Present Both	1	GLYMA_13G357300	GLYMA_13G357300	sp|Q9SUI6|PSAH2_ARATH	Photosystem I reaction center subunit VI-2, chloroplastic GN=PSAH2	ident:114/139 pos:126/139 query:139 hit:145 align:145 bit:223.0	OK	Photosystem I reaction center subunit VI-2, chloroplastic	PSI-H1	PSAH2_ARATH	Q9SUI6	na	PSAH2	na	Arabidopsis thaliana (Mouse-ear cress)	3702
High	Master Protein	GLYMA_01G115900	PTHR21649:SF6 - CHLOROPHYLL A-B BINDING PROTEIN CP29.1, CHLOROPLASTIC-RELATED (1 of 2)	0	95.416	40	8	46	1	290	31.3	6.14	171.08	8	0	0.66	0.580925	16.24	129.6	70.4	43.04	37.04	High	High	High	High	High	High	1		3	3	Present Both	1	GLYMA_01G115900	GLYMA_01G115900	sp|Q9XF88|CB4B_ARATH	Chlorophyll a-b binding protein CP29.2, chloroplastic GN=LHCB4.2	ident:238/290 pos:253/290 query:290 hit:287 align:279 bit:484.2	OK	Chlorophyll a-b binding protein CP29.2, chloroplastic	LHCB4.2; LHCII protein 4.2	CB4B_ARATH	Q9XF88	na	LHCB4.2	na	Arabidopsis thaliana (Mouse-ear cress)	3702
High	Master Protein	GLYMA_16G189500	PF03766 - Remorin, N-terminal region (Remorin_N) (1 of 8)	0	95.261	50	13	38	4	205	22.3	5.82	106.8	13	0	0.01	1.22204e-16	0	196.6	3.4	67.15	87.09	High	High	High	High	Not Found	High	1		3	2	Present Both	1	GLYMA_16G189500	GLYMA_16G189500	sp|Q9M2D8|Y3126_ARATH	Uncharacterized protein At3g61260 GN=CBSDUF4	ident:115/205 pos:134/205 query:205 hit:212 align:168 bit:205.3	OK	Uncharacterized protein At3g61260	na	Y3126_ARATH	Q9M2D8	na	OrderedLocusNames=At3g61260	na	Arabidopsis thaliana (Mouse-ear cress)	3702
High	Master Protein	GLYMA_17G049800	PTHR31238:SF21 - GERMIN-LIKE PROTEIN SUBFAMILY 3 MEMBER 3 (1 of 5)	0	95.04	47	7	29	5	208	21.3	8.43	122.71	7	2	1.126	0.928237	119.02	148.4	51.6	73.83	121.96	High	High	High	High	Peak Found	High	1		3	3	Present Both	1	GLYMA_17G049800	GLYMA_17G049800	sp|P94072|GL33_ARATH	Germin-like protein subfamily 3 member 3 GN=GER3	ident:146/208 pos:168/208 query:208 hit:211 align:208 bit:284.6	OK	Germin-like protein subfamily 3 member 3 (AtGER3; AtGLP2)	na	GL33_ARATH	P94072	P94028	GER3	GLP2A; GLP2B; GLP3; GLP3A; GLP3B	Arabidopsis thaliana (Mouse-ear cress)	3702
High	Master Protein	GLYMA_03G103600	PTHR10772:SF13 - CHLOROPLAST CHAPERONIN 10 (1 of 2)	0	95.018	59	7	32	1	134	14.7	8.78	138.03	7	6	1.075	0.962255	70.13	71.7	128.3	78.28	29.88	Peak Found	Peak Found	High	High	Not Found	High	1		3	2	Present Both	1	GLYMA_03G103600	GLYMA_03G103600	sp|Q9M1C2|CH101_ARATH	10 kDa chaperonin 1, chloroplastic GN=CPN10-1	ident:87/134 pos:112/134 query:134 hit:138 align:138 bit:182.2	OK	10 kDa chaperonin 1, chloroplastic	na	CH101_ARATH	Q9M1C2	na	CPN10-1	na	Arabidopsis thaliana (Mouse-ear cress)	3702
High	Master Protein	GLYMA_03G080200		0	93.648	32	7	39	2	197	20.9	4.86	146.65	7	5	1.095	0.948273	47.08	108.7	91.3	40.46	30.2	High	High	High	High	High	High	1		3	3	Present Both	1	GLYMA_03G080200	GLYMA_03G080200	sp|Q8LDV3|Y4320_ARATH	Uncharacterized protein At4g13200, chloroplastic GN=CBSCBSPB1	ident:61/197 pos:74/197 query:197 hit:185 align:96 bit:125.6	Partial_match_both	Uncharacterized protein At4g13200, chloroplastic	na	Y4320_ARATH	Q8LDV3	Q9SVQ7	OrderedLocusNames=At4g13200	na	Arabidopsis thaliana (Mouse-ear cress)	3702
High	Master Protein	GLYMA_01G182600		0	93.563	30	7	26	4	169	17.7	5.4	90.98	7	3	0.487	0.132887	8.26	144.4	55.6	64.33	88.92	High	High	High	High	High	High	1		3	3	Present Both	1	GLYMA_01G182600	GLYMA_01G182600	sp|Q9C638|WEL2_ARATH	Protein WEAK CHLOROPLAST MOVEMENT UNDER BLUE LIGHT-like 2 GN=WEL2	ident:39/169 pos:67/169 query:169 hit:752 align:151 bit:28.1	Partial_match_hit	Protein WEAK CHLOROPLAST MOVEMENT UNDER BLUE LIGHT-like 2 (Protein WEL2)	na	WEL2_ARATH	Q9C638	na	WEL2	na	Arabidopsis thaliana (Mouse-ear cress)	3702
High	Master Protein	GLYMA_07G019700	K02695 - photosystem I subunit VI (psaH) (1 of 5)	0	93.433	55	7	54	2	150	15.9	9.91	249.46	7	5	1.576	0.439466	103.37	74.2	125.8	22.69	74.82	High	High	High	High	High	High	1		3	3	Present Both	1	GLYMA_07G019700	GLYMA_07G019700	sp|Q9SUI6|PSAH2_ARATH	Photosystem I reaction center subunit VI-2, chloroplastic GN=PSAH2	ident:118/150 pos:128/150 query:150 hit:145 align:151 bit:231.5	OK	Photosystem I reaction center subunit VI-2, chloroplastic	PSI-H1	PSAH2_ARATH	Q9SUI6	na	PSAH2	na	Arabidopsis thaliana (Mouse-ear cress)	3702
High	Master Protein	GLYMA_04G139200	K02899 - large subunit ribosomal protein L27 (RP-L27, MRPL27, rpmA) (1 of 4)	0	93.388	30	7	38	1	194	21.2	10.3	148.13	7	0	0.89	0.962284	6.29	106.3	93.7	3.56	11.2	High	High	High	High	Peak Found	High	1		3	3	Present Both	1	GLYMA_04G139200	GLYMA_04G139200	sp|Q9FLN4|RK27_ARATH	50S ribosomal protein L27, chloroplastic GN=RPL27	ident:135/194 pos:154/194 query:194 hit:198 align:205 bit:228.8	OK	50S ribosomal protein L27, chloroplastic	CL27	RK27_ARATH	Q9FLN4	na	RPL27	na	Arabidopsis thaliana (Mouse-ear cress)	3702
High	Master Protein	GLYMA_10G040600	K08903 - photosystem II 13kDa protein (psb28) (1 of 2)	0	92.745	24	5	59	2	179	20.1	9.04	220.39	5	0	0.844	0.928237	35.7	109.3	90.7	1.57	15.65	High	High	High	High	High	High	1		3	3	Present Both	1	GLYMA_10G040600	GLYMA_10G040600	sp|Q8W0Y8|PSB28_ARATH	Photosystem II reaction center PSB28 protein, chloroplastic GN=PSB28	ident:108/179 pos:136/179 query:179 hit:183 align:182 bit:210.3	OK	Photosystem II reaction center PSB28 protein, chloroplastic	Photosystem II protein W-like	PSB28_ARATH	Q8W0Y8	Q9M0G6	PSB28	na	Arabidopsis thaliana (Mouse-ear cress)	3702
High	Master Protein	GLYMA_11G101500	K11294 - nucleolin (NCL, NSR1) (1 of 11)	0	92.645	17	9	38	3	748	78.3	5.58	161.43	9	0	1.305	0.727639	64.56	81.4	118.6	46.17	40.42	High	High	High	High	High	Peak Found	1		3	3	Present Both	1	GLYMA_11G101500	GLYMA_11G101500	sp|Q1PEP5|NUCL2_ARATH	Nucleolin 2 GN=NUCL2	ident:143/748 pos:189/748 query:748 hit:636 align:307 bit:256.5	Partial_match_both	Nucleolin 2	Protein NUCLEOLIN LIKE 2 (AtNUC-L2); Protein PARALLEL LIKE 1 (AtPARLL1)	NUCL2_ARATH	Q1PEP5	Q9LIH8	NUCL2	PARLL1	Arabidopsis thaliana (Mouse-ear cress)	3702
High	Master Protein	GLYMA_07G009200		0	92.306	67	2	27	2	66	6.2	10.3	163.15	2	0	0.971	0.999087	75.45	111.3	88.7	10.87	33.25	High	High	High	High	High	High	1		3	3	Present Both	1	GLYMA_07G009200	GLYMA_07G009200	sp|Q9SAJ5|PP133_ARATH	Pentatricopeptide repeat-containing protein At1g79540 GN=PCMP-E65	ident:10/66 pos:16/66 query:66 hit:780 align:26 bit:25.4	Partial_match_both	Pentatricopeptide repeat-containing protein At1g79540	na	PP133_ARATH	Q9SAJ5	na	OrderedLocusNames=At1g79540	na	Arabidopsis thaliana (Mouse-ear cress)	3702
High	Master Protein	GLYMA_13G338700	PTHR12815:SF18 - PROTEIN TOC75-3, CHLOROPLASTIC-RELATED (1 of 2)	0	92.241	13	9	39	9	800	87.5	7.58	142.83	9	0	0.816	0.895799	27.86	109.2	90.8	39.47	24.88	High	High	High	High	High	High	1		3	3	Present Both	1	GLYMA_13G338700	GLYMA_13G338700	sp|Q9STE8|TC753_ARATH	Protein TOC75-3, chloroplastic GN=TOC75-3	ident:587/800 pos:634/800 query:800 hit:818 align:690 bit:1237.2	OK	Protein TOC75-3, chloroplastic	75 kDa translocon at the outer-envelope-membrane of chloroplasts 3 (AtTOC75-III)	TC753_ARATH	Q9STE8	na	TOC75-3	TOC75	Arabidopsis thaliana (Mouse-ear cress)	3702
High	Master Protein	GLYMA_07G120400	PTHR10772:SF13 - CHLOROPLAST CHAPERONIN 10 (1 of 2)	0	92.182	59	7	29	1	134	14.7	8.43	129.84	7	0	0.01	1.22204e-16		200		29.12		High	Peak Found	Not Found	Not Found	Not Found	Not Found	1		2	0	Only Control	1	GLYMA_07G120400	GLYMA_07G120400	sp|Q9M1C2|CH101_ARATH	10 kDa chaperonin 1, chloroplastic GN=CPN10-1	ident:90/134 pos:112/134 query:134 hit:138 align:138 bit:185.7	OK	10 kDa chaperonin 1, chloroplastic	na	CH101_ARATH	Q9M1C2	na	CPN10-1	na	Arabidopsis thaliana (Mouse-ear cress)	3702
High	Master Protein	GLYMA_10G048600	K02930 - large subunit ribosomal protein L4e (RP-L4e, RPL4) (1 of 4)	0	91.446	37	14	48	2	405	44.7	10.45	144.06	14	11	1.121	0.928237	46.16	95.5	104.5	44.74	76.83	High	High	High	High	High	High	1		3	3	Present Both	1	GLYMA_10G048600	GLYMA_10G048600	sp|Q9SF40|RL4A_ARATH	60S ribosomal protein L4-1 GN=RPL4A	ident:336/405 pos:378/405 query:405 hit:406 align:404 bit:694.5	OK	60S ribosomal protein L4-1 (L1)	na	RL4A_ARATH	Q9SF40	na	RPL4A	na	Arabidopsis thaliana (Mouse-ear cress)	3702
High	Master Protein	GLYMA_17G157000	K02266 - cytochrome c oxidase subunit 6a (COX6A) (1 of 2)	0	91.424	36	5	47	1	102	11.6	9.35	163.14	5	0	0.851	0.922663	30.98	97.6	102.4	48.77	28.02	Peak Found	High	High	Peak Found	High	High	1		3	3	Present Both	1	GLYMA_17G157000	GLYMA_17G157000	sp|Q9T070|COX6A_ARATH	Cytochrome c oxidase subunit 6a, mitochondrial GN=COX6A	ident:70/102 pos:81/102 query:102 hit:102 align:102 bit:154.5	OK	Cytochrome c oxidase subunit 6a, mitochondrial (AtCOX6a)	na	COX6A_ARATH	Q9T070	Q8L974	COX6A	na	Arabidopsis thaliana (Mouse-ear cress)	3702
High	Master Protein	GLYMA_09G184500	PTHR13094 - NADH-UBIQUINONE OXIDOREDUCTASE PDSW SUBUNIT (1 of 2)	0	91.305	56	9	44	3	127	15	8.31	142.79	9	0	1.351	0.727639	21	83.4	116.6	24.22	20.65	Peak Found	High	Peak Found	High	Not Found	High	1		3	2	Present Both	1	GLYMA_09G184500	GLYMA_09G184500	sp|Q94C12|NDBAB_ARATH	NADH dehydrogenase [ubiquinone] 1 beta subcomplex subunit 10-B GN=NDC1	ident:79/127 pos:89/127 query:127 hit:106 align:103 bit:170.2	OK	NADH dehydrogenase [ubiquinone] 1 beta subcomplex subunit 10-B	na	NDBAB_ARATH	Q94C12	Q9LS49	OrderedLocusNames=At3g18410	na	Arabidopsis thaliana (Mouse-ear cress)	3702
High	Master Protein	GLYMA_17G100600	PTHR11540:SF14 - MALATE DEHYDROGENASE, CHLOROPLASTIC (1 of 2)	0	90.821	41	12	47	7	409	43.1	7.97	148.07	12	5	1.169	0.890959	50.52	91.5	108.5	10.73	15.65	High	High	High	High	High	High	1		3	3	Present Both	1	GLYMA_17G100600	GLYMA_17G100600	sp|Q9SN86|MDHP_ARATH	Malate dehydrogenase, chloroplastic GN=IDN2	ident:301/409 pos:335/409 query:409 hit:403 align:399 bit:579.7	OK	Malate dehydrogenase, chloroplastic	Chloroplastic malate dehydrogenase (Chloroplastic MDH; cpNAD-MDH); Plastidic NAD-dependent malate dehydrogenase (pNAD-MDH)	MDHP_ARATH	Q9SN86	O81844	OrderedLocusNames=At3g47520	na	Arabidopsis thaliana (Mouse-ear cress)	3702
High	Master Protein	GLYMA_05G238000	K02993 - small subunit ribosomal protein S7e (RP-S7e, RPS7) (1 of 6)	0	90.495	45	12	43	3	191	22	9.72	150.85	12	7	1.157	0.897464	45.95	82.5	117.5	33.92	45.64	High	High	High	High	High	Peak Found	1		3	3	Present Both	1	GLYMA_05G238000	GLYMA_05G238000	sp|Q9M885|RS72_ARATH	40S ribosomal protein S7-2 GN=RPS7B	ident:152/191 pos:171/191 query:191 hit:191 align:191 bit:319.7	OK	40S ribosomal protein S7-2	na	RS72_ARATH	Q9M885	na	RPS7B	na	Arabidopsis thaliana (Mouse-ear cress)	3702
High	Master Protein	GLYMA_03G158100	PTHR23430:SF76 - HISTONE H2A VARIANT 1-RELATED (1 of 4)	0	90.169	53	9	33	2	136	14.5	10.39	108.28	9	5	1.826	0.199531	67.87	77.2	122.8	17.82	75.21	High	High	High	High	High	High	1		3	3	Present Both	1	GLYMA_03G158100	GLYMA_03G158100	sp|O23628|H2AV1_ARATH	Histone H2A variant 1 GN=H2AV	ident:125/136 pos:129/136 query:136 hit:136 align:136 bit:231.5	OK	Histone H2A variant 1	H2A.F/Z 1; H2AvAt; HTA11	H2AV1_ARATH	O23628	na	H2AV	na	Arabidopsis thaliana (Mouse-ear cress)	3702
High	Master Protein	GLYMA_13G000600	K17781 - mitochondrial import inner membrane translocase subunit TIM13 (TIM13) (1 of 2)	0	89.75	62	6	37	2	86	9.3	7.8	157.36	6	0	1.318	0.800337	31.25	96.4	103.6	11.02	50.55	High	High	High	High	Not Found	High	1	Acetyl [N-Term]	3	2	Present Both	1	GLYMA_13G000600	GLYMA_13G000600	sp|Q9XH48|TIM13_ARATH	Mitochondrial import inner membrane translocase subunit TIM13 GN=TIM13	ident:51/86 pos:67/86 query:86 hit:87 align:87 bit:87.0	OK	Mitochondrial import inner membrane translocase subunit TIM13	na	TIM13_ARATH	Q9XH48	Q94KC4; Q9SY93	TIM13	na	Arabidopsis thaliana (Mouse-ear cress)	3702
High	Master Protein	GLYMA_11G134900	PF00582 - Universal stress protein family (Usp) (1 of 74)	0	89.749	36	8	40	5	164	17.7	6	129.89	8	4	0.842	0.924565	28.09	108	92	17.77	16.63	High	High	High	High	High	High	1		3	3	Present Both	1	GLYMA_11G134900	GLYMA_11G134900	sp|Q8VYN9|PHO32_ARATH	Universal stress protein PHOS32 GN=PHOS32	ident:47/164 pos:78/164 query:164 hit:242 align:150 bit:64.3	Poor_match	Universal stress protein PHOS32	Phosphorylated protein of 32 kDa (AtPHOS32)	PHO32_ARATH	Q8VYN9	Q9LSR2	PHOS32	na	Arabidopsis thaliana (Mouse-ear cress)	3702
High	Master Protein	GLYMA_13G357200	PTHR10744:SF7 - 30S RIBOSOMAL PROTEIN S17, CHLOROPLASTIC (1 of 2)	0	89.682	35	7	37	4	176	20.4	10.15	116.38	7	3	0.87	0.948995	37.14	102.6	97.4	41.51	55.1	High	High	High	High	High	Peak Found	1		3	3	Present Both	1	GLYMA_13G357200	GLYMA_13G357200	sp|P16180|RR17_ARATH	30S ribosomal protein S17, chloroplastic GN=RPS17	ident:89/176 pos:109/176 query:176 hit:149 align:147 bit:169.1	Poor_match	30S ribosomal protein S17, chloroplastic	CS17	RR17_ARATH	P16180	na	RPS17	na	Arabidopsis thaliana (Mouse-ear cress)	3702
High	Master Protein	GLYMA_07G073100	PF03766 - Remorin, N-terminal region (Remorin_N) (1 of 8)	0	89.113	59	15	38	8	198	21.6	8.43	111.55	15	5	0.837	0.921221	32.99	106.5	93.5	14.62	21.28	High	High	High	High	High	High	1		3	3	Present Both	1	GLYMA_07G073100	GLYMA_07G073100	sp|Q9M2D8|Y3126_ARATH	Uncharacterized protein At3g61260 GN=CBSDUF4	ident:104/198 pos:128/198 query:198 hit:212 align:159 bit:198.7	OK	Uncharacterized protein At3g61260	na	Y3126_ARATH	Q9M2D8	na	OrderedLocusNames=At3g61260	na	Arabidopsis thaliana (Mouse-ear cress)	3702
High	Master Protein	GLYMA_10G277900		0	88.777	25	6	41	4	85	9.7	9.79	165.14	6	2	1.073	0.963822	70.89	112.4	87.6	58.6	34.38	High	High	High	High	High	High	1		3	3	Present Both	1	GLYMA_10G277900	GLYMA_10G277900	sp|Q9ZUX4|UMP2_ARATH	Uncharacterized protein At2g27730, mitochondrial GN=UKL2	ident:22/85 pos:30/85 query:85 hit:113 align:38 bit:41.2	Partial_match_both	Uncharacterized protein At2g27730, mitochondrial	na	UMP2_ARATH	Q9ZUX4	Q8LBD1	OrderedLocusNames=At2g27730	na	Arabidopsis thaliana (Mouse-ear cress)	3702
High	Master Protein	GLYMA_18G149300		0	88.485	33	7	32	2	193	20.7	5.68	128.97	7	0	0.862	0.940694	45.07	102.5	97.5	7.36	8.42	High	High	Peak Found	High	High	High	1		3	3	Present Both	1	GLYMA_18G149300	GLYMA_18G149300	sp|Q8LDV3|Y4320_ARATH	Uncharacterized protein At4g13200, chloroplastic GN=CBSCBSPB1	ident:69/193 pos:88/193 query:193 hit:185 align:118 bit:126.7	Poor_match	Uncharacterized protein At4g13200, chloroplastic	na	Y4320_ARATH	Q8LDV3	Q9SVQ7	OrderedLocusNames=At4g13200	na	Arabidopsis thaliana (Mouse-ear cress)	3702
High	Master Protein	GLYMA_11G192700	PTHR10003:SF34 - SUPEROXIDE DISMUTASE [CU-ZN] 2, CHLOROPLASTIC (1 of 3)	0	87.872	45	6	22	5	209	21.6	6.33	127.01	6	1	2.181	0.0493485	82.99	112	88	11.81	104.36	High	High	High	High	High	High	1		3	3	Present Both	1	GLYMA_11G192700	GLYMA_11G192700	sp|O78310|SODC2_ARATH	Superoxide dismutase [Cu-Zn] 2, chloroplastic GN=CSD2	ident:142/209 pos:154/209 query:209 hit:216 align:182 bit:276.6	OK	Superoxide dismutase [Cu-Zn] 2, chloroplastic	Copper/zinc superoxide dismutase 2	SODC2_ARATH	O78310	Q0WUQ0; Q541D5; Q9SUJ7; Q9SUJ8	CSD2	KD-SOD; SODCP	Arabidopsis thaliana (Mouse-ear cress)	3702
High	Master Protein	GLYMA_19G121800	PTHR34267:SF1 - AT0ZI1 PROTEIN (1 of 4)	0	86.907	66	8	48	5	79	8.8	8.76	133.78	8	0	1.528	0.48782	43.9	88.1	111.9	28.03	65.78	High	High	Not Found	High	High	Peak Found	1		2	3	Present Both	1	GLYMA_19G121800	GLYMA_19G121800	sp|O81020|NPC2_ARATH	Non-specific phospholipase C2 GN=NPC2	ident:15/79 pos:21/79 query:79 hit:514 align:43 bit:25.4	Partial_match_hit	Non-specific phospholipase C2	na	NPC2_ARATH	O81020	na	NPC2	na	Arabidopsis thaliana (Mouse-ear cress)	3702
High	Master Protein	GLYMA_04G179100	K03946 - NADH dehydrogenase (ubiquinone) 1 alpha subcomplex subunit 2 (NDUFA2) (1 of 2)	0	86.36	46	8	48	3	98	11.1	9.36	177.17	8	5	1.366	0.655258	40.08	84.9	115.1	10.69	12.68	High	High	High	High	High	High	1		3	3	Present Both	1	GLYMA_04G179100	GLYMA_04G179100	sp|Q9FIJ2|NDUA2_ARATH	NADH dehydrogenase [ubiquinone] 1 alpha subcomplex subunit 2 GN=NDB1	ident:68/98 pos:87/98 query:98 hit:97 align:95 bit:155.2	OK	NADH dehydrogenase [ubiquinone] 1 alpha subcomplex subunit 2	na	NDUA2_ARATH	Q9FIJ2	na	OrderedLocusNames=At5g47890	na	Arabidopsis thaliana (Mouse-ear cress)	3702
High	Master Protein	GLYMA_07G032800	K02265 - cytochrome c oxidase subunit 5b (COX5B) (1 of 3)	0	86.245	28	6	35	2	162	17.7	5.38	158.07	6	0	1.432	0.823134	108.46	53.9	146.1	125.66	92.82	Peak Found	Not Found	High	Peak Found	Peak Found	High	1		2	3	Present Both	1	GLYMA_07G032800	GLYMA_07G032800	sp|Q9SSB8|CX5B2_ARATH	Cytochrome c oxidase subunit 5b-2, mitochondrial GN=COX5B-2	ident:97/162 pos:115/162 query:162 hit:171 align:157 bit:185.3	OK	Cytochrome c oxidase subunit 5b-2, mitochondrial (AtCOX5b-2)	na	CX5B2_ARATH	Q9SSB8	Q8LBW7	COX5B-2	na	Arabidopsis thaliana (Mouse-ear cress)	3702
High	Master Protein	GLYMA_11G070900	PTHR13061//PTHR13061:SF9 - DYNACTIN SUBUNIT P25 // SUBFAMILY NOT NAMED (1 of 4)	0	86.114	43	11	41	4	270	29.2	6.86	129.32	11	6	0.886	0.963822	39.06	99.1	100.9	20.41	42.18	High	High	High	Peak Found	High	High	1		3	3	Present Both	1	GLYMA_11G070900	GLYMA_11G070900	sp|Q9FWR5|GCA1_ARATH	Gamma carbonic anhydrase 1, mitochondrial GN=GAMMACA1	ident:209/270 pos:233/270 query:270 hit:275 align:269 bit:432.9	OK	Gamma carbonic anhydrase 1, mitochondrial (AtCA1; GAMMA CA1)	na	GCA1_ARATH	Q9FWR5	Q67XH5; Q682H9; Q8LF67; Q9LN36	GAMMACA1	na	Arabidopsis thaliana (Mouse-ear cress)	3702
High	Master Protein	GLYMA_19G239200	K11251 - histone H2A (H2A) (1 of 24)	0	85.981	64	8	41	5	140	14.7	10.36	134.54	8	0	1.373	0.655206	84.38	99.5	100.5	20.69	79.17	High	High	High	High	High	High	1		3	3	Present Both	1	GLYMA_19G239200	GLYMA_19G239200	sp|Q9S9K7|H2AXB_ARATH	Probable histone H2AXb GN=EZA1	ident:132/140 pos:134/140 query:140 hit:142 align:142 bit:256.9	OK	Probable histone H2AXb	HTA3	H2AXB_ARATH	Q9S9K7	na	OrderedLocusNames=At1g54690	na	Arabidopsis thaliana (Mouse-ear cress)	3702
High	Master Protein	GLYMA_11G187500	PTHR18937//PTHR18937:SF221 - STRUCTURAL MAINTENANCE OF CHROMOSOMES SMC FAMILY MEMBER // SUBFAMILY NOT NAMED (1 of 3)	0	85.744	14	11	41	3	731	82	5.39	129.87	11	0	2.004	0.204069	16.69	87.7	112.3	25.22	15.82	High	High	Peak Found	Peak Found	Not Found	High	1		3	2	Present Both	1	GLYMA_11G187500	GLYMA_11G187500	sp|Q9LW85|MFP1_ARATH	MAR-binding filament-like protein 1 GN=MFP1	ident:318/731 pos:464/731 query:731 hit:726 align:720 bit:485.0	Poor_match	MAR-binding filament-like protein 1	na	MFP1_ARATH	Q9LW85	Q7Y1Z5	MFP1	na	Arabidopsis thaliana (Mouse-ear cress)	3702
High	Master Protein	GLYMA_13G367000	PTHR10371 - NADH DEHYDROGENASE UBIQUINONE FLAVOPROTEIN 2, MITOCHONDRIAL (1 of 2)	0	84.98	32	10	46	10	299	33.6	7.05	143.84	10	0	1.435	0.587495	58.24	85.1	114.9	27.02	53.46	High	High	High	High	High	High	1		3	3	Present Both	1	GLYMA_13G367000	GLYMA_13G367000	sp|O22769|NDUV2_ARATH	NADH dehydrogenase [ubiquinone] flavoprotein 2, mitochondrial GN=NDL3	ident:191/299 pos:203/299 query:299 hit:255 align:220 bit:405.2	OK	NADH dehydrogenase [ubiquinone] flavoprotein 2, mitochondrial	na	NDUV2_ARATH	O22769	Q940Z9	OrderedLocusNames=At4g02580	na	Arabidopsis thaliana (Mouse-ear cress)	3702
High	Master Protein	GLYMA_12G219300	K08914 - light-harvesting complex II chlorophyll a/b binding protein 3 (LHCB3) (1 of 2)	0	84.935	34	8	20	7	268	28.8	5.27	78.68	8	0	0.94	0.981586	57.95	101.2	98.8	78.09	83.39	High	High	High	High	High	High	1		3	3	Present Both	1	GLYMA_12G219300	GLYMA_12G219300	sp|Q9S7M0|CB3_ARATH	Chlorophyll a-b binding protein 3, chloroplastic GN=LHCB3	ident:237/268 pos:250/268 query:268 hit:265 align:268 bit:488.4	OK	Chlorophyll a-b binding protein 3, chloroplastic	Light-harvesting chlorophyll B-binding protein 3 (LHCB3*1; Lhcb3)	CB3_ARATH	Q9S7M0	C0Z239; Q42016	LHCB3	na	Arabidopsis thaliana (Mouse-ear cress)	3702
High	Master Protein	GLYMA_08G045100	K02993 - small subunit ribosomal protein S7e (RP-S7e, RPS7) (1 of 6)	0	84.789	41	11	38	2	191	22	9.8	134.42	11	0	2.708	0.0091295	67.41	116.2	83.8	12.2	94.35	Peak Found	High	Not Found	High	Peak Found	Not Found	1		2	2	Present Both	1	GLYMA_08G045100	GLYMA_08G045100	sp|Q9M885|RS72_ARATH	40S ribosomal protein S7-2 GN=RPS7B	ident:153/191 pos:171/191 query:191 hit:191 align:191 bit:320.9	OK	40S ribosomal protein S7-2	na	RS72_ARATH	Q9M885	na	RPS7B	na	Arabidopsis thaliana (Mouse-ear cress)	3702
High	Master Protein	GLYMA_03G230300	PF01789 - PsbP (PsbP) (1 of 26)	0	84.699	50	9	45	9	258	29.3	7.43	142.27	9	0	0.734	0.727639	23.83	123.8	76.2	78.68	36.88	High	High	High	High	High	High	1		3	3	Present Both	1	GLYMA_03G230300	GLYMA_03G230300	sp|O23403|PPD1_ARATH	PsbP domain-containing protein 1, chloroplastic GN=PPD1	ident:158/258 pos:188/258 query:258 hit:287 align:225 bit:315.8	OK	PsbP domain-containing protein 1, chloroplastic	OEC23-like protein 3; PsbP-related thylakoid lumenal protein 1	PPD1_ARATH	O23403	Q3EA17; Q681Q6; Q8LF71	PPD1	na	Arabidopsis thaliana (Mouse-ear cress)	3702
High	Master Protein	GLYMA_13G126900	K17769 - mitochondrial import receptor subunit TOM22 (TOM22) (1 of 4)	0	84.679	85	7	34	5	97	10.3	10.26	126.94	7	1	1.102	0.944471	51.69	58.5	141.5	54.92	22.59	High	High	High	High	High	High	1		3	3	Present Both	1	GLYMA_13G126900	GLYMA_13G126900	sp|Q9FNC9|TOM92_ARATH	Mitochondrial import receptor subunit TOM9-2 GN=TOM9-2	ident:60/97 pos:75/97 query:97 hit:99 align:94 bit:119.8	OK	Mitochondrial import receptor subunit TOM9-2	Mitochondrial import receptor subunit TOM22 homolog 2; Translocase of outer membrane 22 kDa subunit homolog 2; Translocase of outer membrane 9 kDa subunit TOM9-2	TOM92_ARATH	Q9FNC9	na	TOM9-2	TOM22-2	Arabidopsis thaliana (Mouse-ear cress)	3702
High	Master Protein	GLYMA_13G065000	PTHR10264//PTHR10264:SF93 - BAND 7 PROTEIN-RELATED // SUBFAMILY NOT NAMED (1 of 7)	0	84.463	23	7	28	2	286	31.5	5.24	99.68	7	3	0.564	0.31314	19.79	144.8	55.2	56.49	30.43	High	High	Not Found	High	Peak Found	High	1		2	3	Present Both	1	GLYMA_13G065000	GLYMA_13G065000	sp|Q9FM19|HIR1_ARATH	Hypersensitive-induced response protein 1 GN=HIR1	ident:242/286 pos:263/286 query:286 hit:286 align:284 bit:505.0	OK	Hypersensitive-induced response protein 1 (AtHIR1)	na	HIR1_ARATH	Q9FM19	na	HIR1	na	Arabidopsis thaliana (Mouse-ear cress)	3702
High	Master Protein	GLYMA_05G019600	K02518 - translation initiation factor IF-1 (infA) (1 of 2)	0	84.448	28	6	25	6	143	16	10.27	105.71	6	0	1.052	0.969869	72.21	91.3	108.7	23.77	47.82	High	High	High	High	High	High	1		3	3	Present Both	1	GLYMA_05G019600	GLYMA_05G019600	sp|O82499|IF1C_ARATH	Translation initiation factor IF-1, chloroplastic GN=IDD5	ident:64/143 pos:79/143 query:143 hit:141 align:134 bit:113.6	Poor_match	Translation initiation factor IF-1, chloroplastic	na	IF1C_ARATH	O82499	Q56YK9; Q8GY59; Q9T016	OrderedLocusNames=At4g11175	na	Arabidopsis thaliana (Mouse-ear cress)	3702
High	Master Protein	GLYMA_02G158200	PTHR10795:SF316 - SERINE PROTEASE-LIKE PROTEIN-RELATED (1 of 3)	0	84.27	38	6	24	6	136	14.7	6.52	99.2	6	0	0.904	0.969121	27.42	110.2	89.8	77.15	78.63	High	High	Peak Found	High	High	High	1		3	3	Present Both	1	GLYMA_02G158200	GLYMA_02G158200	sp|Q8L7I2|SBT36_ARATH	Subtilisin-like protease SBT3.6 GN=SBT3.6	ident:43/136 pos:66/136 query:136 hit:778 align:113 bit:75.5	Partial_match_hit	Subtilisin-like protease SBT3.6	Subtilase subfamily 3 member 6 (AtSBT3.6)	SBT36_ARATH	Q8L7I2	A8MS13; F4JMC8; Q0WVJ9; Q9T0B5; Q9ZSB3	SBT3.6	na	Arabidopsis thaliana (Mouse-ear cress)	3702
High	Master Protein	GLYMA_08G199900	K01412 - mitochondrial-processing peptidase subunit alpha [EC:3.4.24.64] (PMPCA, MAS2) (1 of 6)	0	83.949	27	10	34	2	505	54.4	6.21	107.25	10	5	0.682	0.62982	27.17	116.1	83.9	75.93	22.5	High	High	Not Found	High	Not Found	Not Found	1		2	1	Only Control	1	GLYMA_08G199900	GLYMA_08G199900	sp|Q9ZU25|MPPA1_ARATH	Probable mitochondrial-processing peptidase subunit alpha-1, mitochondrial GN=MORF9	ident:348/505 pos:406/505 query:505 hit:503 align:506 bit:664.1	OK	Probable mitochondrial-processing peptidase subunit alpha-1, mitochondrial	Alpha-MPP 1	MPPA1_ARATH	Q9ZU25	Q0WW81; Q8L9K3	OrderedLocusNames=At1g51980	na	Arabidopsis thaliana (Mouse-ear cress)	3702
High	Master Protein	GLYMA_19G223600	PTHR24031:SF155 - DEAD-BOX ATP-DEPENDENT RNA HELICASE 3, CHLOROPLASTIC (1 of 4)	0	83.811	27	14	45	4	771	84.1	7.58	124.28	14	0	0.715	0.67273	13.58	143.1	56.9	8.54	27.8	High	High	High	High	High	High	1		3	3	Present Both	1	GLYMA_19G223600	GLYMA_19G223600	sp|Q8L7S8|RH3_ARATH	DEAD-box ATP-dependent RNA helicase 3, chloroplastic GN=RH3	ident:491/771 pos:560/771 query:771 hit:748 align:657 bit:944.9	OK	DEAD-box ATP-dependent RNA helicase 3, chloroplastic	Protein EMBRYO DEFECTIVE 1138	RH3_ARATH	Q8L7S8	O65255; Q0WMJ9; Q8LPE9; Q8RUW1; Q9SB96	RH3	EMB1138	Arabidopsis thaliana (Mouse-ear cress)	3702
High	Master Protein	GLYMA_04G226900	K02940 - large subunit ribosomal protein L9e (RP-L9e, RPL9) (1 of 4)	0	83.506	38	9	36	3	192	21.7	9.5	124.09	9	6	1.11	0.941298	45.29	95.8	104.2	28.32	48.17	High	High	High	High	High	High	1		3	3	Present Both	1	GLYMA_04G226900	GLYMA_04G226900	sp|P49209|RL91_ARATH	60S ribosomal protein L9-1 GN=RPL9C	ident:166/192 pos:183/192 query:192 hit:194 align:193 bit:344.0	OK	60S ribosomal protein L9-1	na	RL91_ARATH	P49209	Q9LDX2	RPL9B	na	Arabidopsis thaliana (Mouse-ear cress)	3702
High	Master Protein	GLYMA_18G251400	K13199 - plasminogen activator inhibitor 1 RNA-binding protein (SERBP1) (1 of 5)	0	82.707	31	10	28	5	370	39.9	6.3	102.53	10	4	0.888	0.963822	36.89	94.9	105.1	18.45	59.91	High	High	Peak Found	High	High	High	1		3	3	Present Both	1	GLYMA_18G251400	GLYMA_18G251400	sp|O23593|RGGB_ARATH	RGG repeats nuclear RNA binding protein B GN=RGGB	ident:191/370 pos:235/370 query:370 hit:360 align:385 bit:280.0	OK	RGG repeats nuclear RNA binding protein B	na	RGGB_ARATH	O23593	Q8LB56	RGGB	na	Arabidopsis thaliana (Mouse-ear cress)	3702
High	Master Protein	GLYMA_07G007000	K15718 - linoleate 9S-lipoxygenase (LOX1_5) (1 of 21)	0	82.338	17	13	45	6	864	96.8	6.15	123.37	13	1	1.151	0.906269	52.51	93	107	19.04	23.55	High	High	High	High	High	High	1		3	3	Present Both	1	GLYMA_07G007000	GLYMA_07G007000	sp|Q06327|LOX1_ARATH	Linoleate 9S-lipoxygenase 1 GN=LOX1	ident:484/864 pos:623/864 query:864 hit:859 align:869 bit:983.4	OK	Linoleate 9S-lipoxygenase 1	Lipoxygenase 1 (AtLOX1)	LOX1_ARATH	Q06327	Q9FZ30	LOX1	na	Arabidopsis thaliana (Mouse-ear cress)	3702
High	Master Protein	GLYMA_10G040200	K17769 - mitochondrial import receptor subunit TOM22 (TOM22) (1 of 4)	0	82.101	78	6	42	4	97	10.3	10.26	156.12	6	0	1.563	0.454856	44.59	86.2	113.8	18.25	19.09	High	High	High	High	High	High	1		3	3	Present Both	1	GLYMA_10G040200	GLYMA_10G040200	sp|Q9FNC9|TOM92_ARATH	Mitochondrial import receptor subunit TOM9-2 GN=TOM9-2	ident:59/97 pos:74/97 query:97 hit:99 align:94 bit:115.5	OK	Mitochondrial import receptor subunit TOM9-2	Mitochondrial import receptor subunit TOM22 homolog 2; Translocase of outer membrane 22 kDa subunit homolog 2; Translocase of outer membrane 9 kDa subunit TOM9-2	TOM92_ARATH	Q9FNC9	na	TOM9-2	TOM22-2	Arabidopsis thaliana (Mouse-ear cress)	3702
High	Master Protein	GLYMA_13G334200	K12881 - THO complex subunit 4 (THOC4, ALY) (1 of 5)	0	81.694	46	7	28	3	243	25.9	10.14	105.54	7	0	0.621	0.524537	28.89	123.4	76.6	8.83	66.42	High	High	Not Found	High	Peak Found	Peak Found	1		2	3	Present Both	1	GLYMA_13G334200	GLYMA_13G334200	sp|Q8L773|THO4A_ARATH	THO complex subunit 4A GN=ALY1	ident:138/243 pos:169/243 query:243 hit:244 align:257 bit:229.2	OK	THO complex subunit 4A	ALYREF homolog 1 (AtALY1)	THO4A_ARATH	Q8L773	Q8LCA6; Q9FJE1	ALY1	THO4A	Arabidopsis thaliana (Mouse-ear cress)	3702
High	Master Protein	GLYMA_06G153400	PF11910 - Cyanobacterial and plant NDH-1 subunit O (NdhO) (1 of 1)	0	80.889	59	9	48	9	154	17.2	9.22	151.55	9	0	0.731	0.727639	34.65	119.4	80.6	5.67	35.43	High	High	High	High	High	High	1		3	3	Present Both	1	GLYMA_06G153400	GLYMA_06G153400	sp|Q9S829|NDHO_ARATH	NAD(P)H-quinone oxidoreductase subunit O, chloroplastic GN=ndhO	ident:99/154 pos:121/154 query:154 hit:158 align:159 bit:188.0	OK	NAD(P)H-quinone oxidoreductase subunit O, chloroplastic	NAD(P)H dehydrogenase subunit O (NDH subunit O; NDH-O); NADH-plastoquinone oxidoreductase subunit O	NDHO_ARATH	Q9S829	na	ndhO	na	Arabidopsis thaliana (Mouse-ear cress)	3702
High	Master Protein	GLYMA_20G110900		0	80.587	22	5	40	3	88	10	9.7	156.02	5	0	0.916	0.974214	54.77	108.9	91.1	50.14	24.62	High	High	High	High	High	High	1		3	3	Present Both	1	GLYMA_20G110900	GLYMA_20G110900	sp|Q9ZUX4|UMP2_ARATH	Uncharacterized protein At2g27730, mitochondrial GN=UKL2	ident:19/88 pos:27/88 query:88 hit:113 align:32 bit:38.9	Partial_match_both	Uncharacterized protein At2g27730, mitochondrial	na	UMP2_ARATH	Q9ZUX4	Q8LBD1	OrderedLocusNames=At2g27730	na	Arabidopsis thaliana (Mouse-ear cress)	3702
High	Master Protein	GLYMA_14G072400	K02909 - large subunit ribosomal protein L31 (RP-L31, rpmE) (1 of 2)	0	80.165	41	7	26	7	134	15	9.54	74.99	7	0	0.808	0.876376	45.21	116.5	83.5	57.42	66.65	High	High	High	High	Peak Found	High	1		3	3	Present Both	1	GLYMA_14G072400	GLYMA_14G072400	sp|Q9FWS4|RK31_ARATH	50S ribosomal protein L31, chloroplastic GN=RPL31	ident:79/134 pos:98/134 query:134 hit:144 align:133 bit:161.8	OK	50S ribosomal protein L31, chloroplastic	CL31; Protein EMBRYO DEFECTIVE 2184	RK31_ARATH	Q9FWS4	na	RPL31	EMB2184	Arabidopsis thaliana (Mouse-ear cress)	3702
High	Master Protein	GLYMA_17G084300	PF00581 - Rhodanese-like domain (Rhodanese) (1 of 30)	0	79.595	28	8	18	4	397	41.8	9.39	73.71	8	2	1.062	0.969869	51.58	146.7	53.3	36.14	26.8	High	High	High	High	Peak Found	High	1		3	3	Present Both	1	GLYMA_17G084300	GLYMA_17G084300	sp|Q9FN48|CAS_ARATH	Calcium sensing receptor, chloroplastic GN=CAS	ident:268/397 pos:330/397 query:397 hit:387 align:398 bit:545.4	OK	Calcium sensing receptor, chloroplastic	Sulfurtransferase 3 (AtStr3)	CAS_ARATH	Q9FN48	na	CAS	STR3	Arabidopsis thaliana (Mouse-ear cress)	3702
High	Master Protein	GLYMA_03G148100	K11251 - histone H2A (H2A) (1 of 24)	0	79.504	63	8	43	4	144	15.3	10.29	133.17	8	0	0.923	0.974214	104.95	55.7	144.3	95.71	73.04	Peak Found	High	High	High	High	High	1		3	3	Present Both	1	GLYMA_03G148100	GLYMA_03G148100	sp|O04848|H2AXA_ARATH	Probable histone H2AXa GN=EXT1	ident:120/144 pos:131/144 query:144 hit:142 align:142 bit:240.7	OK	Probable histone H2AXa	HTA5	H2AXA_ARATH	O04848	Q8LAC0	OrderedLocusNames=At1g08880	na	Arabidopsis thaliana (Mouse-ear cress)	3702
High	Master Protein	GLYMA_05G219400	K09490 - heat shock 70kDa protein 5 (HSPA5, BIP) (1 of 4)	0	79.35	24	13	31	1	668	73.6	5.19	108.22	13	7	1.038	0.974214	59.55	126.1	73.9	23.09	57.3	High	High	Not Found	High	Peak Found	High	1		2	3	Present Both	1	GLYMA_05G219400	GLYMA_05G219400	sp|Q39043|MD37F_ARATH	Mediator of RNA polymerase II transcription subunit 37f GN=MED37F	ident:613/668 pos:642/668 query:668 hit:668 align:668 bit:1242.6	OK	Mediator of RNA polymerase II transcription subunit 37f	Heat shock 70 kDa protein 12; Heat shock protein 70-12 (AtHsp70-12); Luminal-binding protein 2 (AtBP2; BiP2)	MD37F_ARATH	Q39043	Q39042	MED37F	BIP; BIP2; HSP70-11; MED37_6	Arabidopsis thaliana (Mouse-ear cress)	3702
High	Master Protein	GLYMA_16G194100	PTHR10281:SF45 - MEMBRANE STEROID-BINDING PROTEIN 1-RELATED (1 of 5)	0	78.774	28	5	24	2	222	24.2	4.64	95.63	5	1	1.05	0.978501	52.46	108	92	26.09	66.87	High	High	Not Found	Not Found	Not Found	Not Found	1		2	0	Only Control	1	GLYMA_16G194100	GLYMA_16G194100	sp|Q9M2Z4|MSBP2_ARATH	Membrane steroid-binding protein 2 GN=MSBP2	ident:142/222 pos:160/222 query:222 hit:233 align:213 bit:270.0	OK	Membrane steroid-binding protein 2 (AtMP2)	Membrane-associated progesterone-binding protein 3 (AtMAPR3)	MSBP2_ARATH	Q9M2Z4	Q9XFM5	MSBP2	MAPR3; MP2	Arabidopsis thaliana (Mouse-ear cress)	3702
High	Master Protein	GLYMA_05G204300	PTHR13061:SF0 - GAMMA CARBONIC ANHYDRASE-LIKE 1, MITOCHONDRIAL-RELATED (1 of 2)	0	78.621	34	9	42	1	253	27.7	8.18	120.05	9	8	0.908	0.972334	50.65	120.6	79.4	66.12	53.93	Not Found	Not Found	High	Peak Found	Peak Found	Not Found	1		1	2	Only Sample	1	GLYMA_05G204300	GLYMA_05G204300	sp|Q9FMV1|GCAL1_ARATH	Gamma carbonic anhydrase-like 1, mitochondrial GN=GAMMACAL1	ident:198/253 pos:215/253 query:253 hit:252 align:247 bit:400.6	OK	Gamma carbonic anhydrase-like 1, mitochondrial (AtCAL1; GAMMA CAL1)	na	GCAL1_ARATH	Q9FMV1	Q8LBM1; Q93XY3	GAMMACAL1	na	Arabidopsis thaliana (Mouse-ear cress)	3702
High	Master Protein	GLYMA_12G064300	PF00314 - Thaumatin family (Thaumatin) (1 of 61)	0	78.46	12	3	51	3	248	26.2	7.85	201.16	3	0	0.994	0.996706	43.15	103.6	96.4	26.25	14.92	High	High	High	High	High	High	1		3	3	Present Both	1	GLYMA_12G064300	GLYMA_12G064300	sp|P50699|TLPH_ARATH	Thaumatin-like protein GN=TIR	ident:101/248 pos:133/248 query:248 hit:243 align:225 bit:185.7	Poor_match	Thaumatin-like protein	na	TLPH_ARATH	P50699	Q9LM26	OrderedLocusNames=At1g18250	na	Arabidopsis thaliana (Mouse-ear cress)	3702
High	Master Protein	GLYMA_20G201300	PTHR24012:SF308 - PROTEIN Y55F3AM.3, ISOFORM A (1 of 2)	0	78.016	21	9	23	3	476	48	7.14	75.04	9	5	1.231	0.80391	39.54	79.9	120.1	25.86	37.86	High	High	Not Found	High	Peak Found	Not Found	1		2	2	Present Both	1	GLYMA_20G201300	GLYMA_20G201300	sp|Q8W034|RNP1_ARATH	Heterogeneous nuclear ribonucleoprotein 1 GN=RNP1	ident:244/476 pos:291/476 query:476 hit:411 align:474 bit:325.1	OK	Heterogeneous nuclear ribonucleoprotein 1 (hnRNP1)	na	RNP1_ARATH	Q8W034	O23288	RNP1	na	Arabidopsis thaliana (Mouse-ear cress)	3702
High	Master Protein	GLYMA_06G138700	K02940 - large subunit ribosomal protein L9e (RP-L9e, RPL9) (1 of 4)	0	77.856	38	9	39	3	192	21.7	9.42	123.39	9	0	1.149	0.906801	50.47	94.4	105.6	28.29	37.46	High	High	High	High	High	High	1		3	3	Present Both	1	GLYMA_06G138700	GLYMA_06G138700	sp|P49209|RL91_ARATH	60S ribosomal protein L9-1 GN=RPL9C	ident:166/192 pos:183/192 query:192 hit:194 align:193 bit:340.9	OK	60S ribosomal protein L9-1	na	RL91_ARATH	P49209	Q9LDX2	RPL9B	na	Arabidopsis thaliana (Mouse-ear cress)	3702
High	Master Protein	GLYMA_05G139900	KOG4467 - Uncharacterized conserved protein (1 of 4)	0	77.407	13	7	17	7	597	65.9	8.69	70.91	7	0	1.471	0.552635	35.39	87.9	112.1	54.88	11.16	High	High	High	High	High	High	1		3	3	Present Both	1	GLYMA_05G139900	GLYMA_05G139900	sp|Q94A41|AMY3_ARATH	Alpha-amylase 3, chloroplastic GN=AMY3	ident:20/597 pos:32/597 query:597 hit:887 align:67 bit:32.0	Partial_match_both	Alpha-amylase 3, chloroplastic (AtAMY3)	1,4-alpha-D-glucan glucanohydrolase	AMY3_ARATH	Q94A41	Q9CAR6	AMY3	na	Arabidopsis thaliana (Mouse-ear cress)	3702
High	Master Protein	GLYMA_14G048000	PTHR10795//PTHR10795:SF365 - PROPROTEIN CONVERTASE SUBTILISIN/KEXIN // SUBFAMILY NOT NAMED (1 of 8)	0	76.965	22	12	26	12	783	84	9.31	80.02	12	0	1.303	0.727639	99.32	89.3	110.7	65.71	92.7	High	High	High	High	High	High	1		3	3	Present Both	1	GLYMA_14G048000	GLYMA_14G048000	sp|Q9ZSP5|AIR3_ARATH	Subtilisin-like protease SBT5.3 GN=AIR3	ident:399/783 pos:519/783 query:783 hit:772 align:756 bit:779.6	OK	Subtilisin-like protease SBT5.3	Auxin-induced in root cultures protein 3; Subtilase subfamily 5 member 3 (AtSBT5.3); Subtilisin-like protease AIR3	AIR3_ARATH	Q9ZSP5	Q8S896; Q8S8B0; Q93W36	AIR3	SBT5.3	Arabidopsis thaliana (Mouse-ear cress)	3702
High	Master Protein	GLYMA_19G165900	K11130 - H/ACA ribonucleoprotein complex subunit 3 (NOP10, NOLA3) (1 of 2)	0	76.589	33	6	35	2	120	13.8	9.52	127.83	6	0	0.557	0.288925	25.65	130.9	69.1	57.8	39.87	High	High	High	High	High	High	1		3	3	Present Both	1	GLYMA_19G165900	GLYMA_19G165900	sp|Q93XX8|NOP10_ARATH	H/ACA ribonucleoprotein complex subunit 3-like protein GN=NUP205	ident:52/120 pos:58/120 query:120 hit:64 align:64 bit:110.2	Poor_match	H/ACA ribonucleoprotein complex subunit 3-like protein	Nucleolar protein 10	NOP10_ARATH	Q93XX8	Q9SIM0	OrderedLocusNames=At2g20490	na	Arabidopsis thaliana (Mouse-ear cress)	3702
High	Master Protein	GLYMA_20G249300	PTHR11071:SF11 - PEPTIDYL-PROLYL CIS-TRANS ISOMERASE C (1 of 2)	0	76.089	35	6	33	6	253	27.1	9.48	105.82	6	0	1.04	0.974214	48.18	92.5	107.5	11.94	7.92	High	High	High	High	High	High	1		3	3	Present Both	1	GLYMA_20G249300	GLYMA_20G249300	sp|Q9ASS6|PNSL5_ARATH	Photosynthetic NDH subunit of lumenal location 5, chloroplastic GN=PNSL5	ident:147/253 pos:165/253 query:253 hit:259 align:180 bit:326.6	OK	Photosynthetic NDH subunit of lumenal location 5, chloroplastic	Cyclophilin of 20 kDa 2; Peptidyl-prolyl cis-trans isomerase CYP20-2 (PPIase CYP20-2); Rotamase CYP20-2; Thylakoid lumen PPIase of 20 kDa (TLP20)	PNSL5_ARATH	Q9ASS6	F4K2G0; Q53YK9; Q8L9L5; Q9FY98	PNSL5	CYP20-2	Arabidopsis thaliana (Mouse-ear cress)	3702
High	Master Protein	GLYMA_11G105900	PTHR11544 - COLD SHOCK DOMAIN CONTAINING PROTEINS (1 of 8)	0	75.933	21	6	24	6	212	21	4.73	87.8	6	0	1.295	0.727639	44.93	93.3	106.7	45.62	42.57	High	High	High	High	High	High	1		3	3	Present Both	1	GLYMA_11G105900	GLYMA_11G105900	sp|Q38896|CSP4_ARATH	Cold shock domain-containing protein 4 GN=CSP4	ident:53/212 pos:64/212 query:212 hit:201 align:81 bit:109.0	Partial_match_both	Cold shock domain-containing protein 4 (AtCSP4)	Glycine-rich protein 2b (AtGRP2b)	CSP4_ARATH	Q38896	Q5BIT2	CSP4	GRP2B	Arabidopsis thaliana (Mouse-ear cress)	3702
High	Master Protein	GLYMA_08G139100	PTHR10516:SF269 - PEPTIDYL-PROLYL CIS-TRANS ISOMERASE FKBP16-2, CHLOROPLASTIC (1 of 2)	0	75.847	18	5	42	5	209	22.3	7.83	147.7	5	0	0.667	0.596219	19.8	127	73	10.46	7.55	High	High	High	High	High	High	1		3	3	Present Both	1	GLYMA_08G139100	GLYMA_08G139100	sp|Q9SCY3|PNSL4_ARATH	Photosynthetic NDH subunit of lumenal location 4, chloroplastic GN=PNSL4	ident:132/209 pos:152/209 query:209 hit:217 align:177 bit:285.4	OK	Photosynthetic NDH subunit of lumenal location 4, chloroplastic	FK506-binding protein 16-2 (AtFKBP16-2); Immunophilin FKBP16-2; Peptidyl-prolyl cis-trans isomerase FKBP16-2 (PPIase FKBP16-2); Rotamase	PNSL4_ARATH	Q9SCY3	O65658; Q941D9	PNSL4	na	Arabidopsis thaliana (Mouse-ear cress)	3702
High	Master Protein	GLYMA_11G060900		0	75.087	51	7	14	4	162	16.8	5.66	60.7	7	0	0.764	0.753758	42.19	98.2	101.8	96.25	95.37	Peak Found	High	Peak Found	High	High	High	1		3	3	Present Both	1	GLYMA_11G060900	GLYMA_11G060900	sp|Q4F7G0|ERDL2_ARATH	Sugar transporter ERD6-like 2 GN=SUGTL3	ident:23/162 pos:32/162 query:162 hit:462 align:63 bit:31.6	Partial_match_both	Sugar transporter ERD6-like 2	Sugar transporter-like protein 3	ERDL2_ARATH	Q4F7G0	O04040; Q94F32; Q9SCW8	SUGTL3	na	Arabidopsis thaliana (Mouse-ear cress)	3702
High	Master Protein	GLYMA_02G012400	PTHR34372:SF2 - CYTOCHROME C OXIDASE SUBUNIT 5C-2-RELATED (1 of 3)	0	74.794	91	8	41	4	64	7.1	8.59	120.91	8	4	2.283	0.0336132	94.44	72.1	127.9	12.82	68.46	High	High	High	High	High	High	1		3	3	Present Both	1	GLYMA_02G012400	GLYMA_02G012400	sp|Q9LZQ0|CX5C2_ARATH	Cytochrome c oxidase subunit 5C-2 GN=COX5B-2	ident:53/64 pos:60/64 query:64 hit:64 align:64 bit:115.5	OK	Cytochrome c oxidase subunit 5C-2	Cytochrome c oxidase polypeptide Vc-2	CX5C2_ARATH	Q9LZQ0	Q27GK0; Q84JY6	OrderedLocusNames=At3g62400	na	Arabidopsis thaliana (Mouse-ear cress)	3702
High	Master Protein	GLYMA_15G016300	K02695 - photosystem I subunit VI (psaH) (1 of 5)	0	74.777	58	6	34	3	139	14.9	9.99	149.06	6	0	2.646	0.0059885	82.97	57.1	142.9	41.44	94.26	High	High	Peak Found	High	High	High	1		3	3	Present Both	1	GLYMA_15G016300	GLYMA_15G016300	sp|Q9SUI6|PSAH2_ARATH	Photosystem I reaction center subunit VI-2, chloroplastic GN=PSAH2	ident:113/139 pos:126/139 query:139 hit:145 align:145 bit:223.0	OK	Photosystem I reaction center subunit VI-2, chloroplastic	PSI-H1	PSAH2_ARATH	Q9SUI6	na	PSAH2	na	Arabidopsis thaliana (Mouse-ear cress)	3702
High	Master Protein	GLYMA_08G329900	PTHR32382:SF4 - FASCICLIN-LIKE ARABINOGALACTAN PROTEIN 1 (1 of 6)	0	74.305	17	5	22	3	415	43.7	6.24	100.4	5	1	0.796	0.855893	27.64	121.6	78.4	10.21	32.88	High	High	High	High	High	High	1		3	3	Present Both	1	GLYMA_08G329900	GLYMA_08G329900	sp|Q9FM65|FLA1_ARATH	Fasciclin-like arabinogalactan protein 1 GN=FLA1	ident:244/415 pos:287/415 query:415 hit:424 align:398 bit:434.1	OK	Fasciclin-like arabinogalactan protein 1	na	FLA1_ARATH	Q9FM65	Q8L8T1	FLA1	na	Arabidopsis thaliana (Mouse-ear cress)	3702
High	Master Protein	GLYMA_13G204800	K02115 - F-type H+-transporting ATPase subunit gamma (ATPF1G, atpG) (1 of 3)	0	73.621	17	8	37	8	375	41.3	7.61	106.03	8	0	0.678	0.618804	28.07	100.7	99.3	8.72	36.72	High	High	High	High	High	High	1		3	3	Present Both	1	GLYMA_13G204800	GLYMA_13G204800	sp|Q01908|ATPG1_ARATH	ATP synthase gamma chain 1, chloroplastic GN=ATPC1	ident:319/375 pos:345/375 query:375 hit:373 align:376 bit:621.3	OK	ATP synthase gamma chain 1, chloroplastic	F-ATPase gamma subunit 1	ATPG1_ARATH	Q01908	na	ATPC1	na	Arabidopsis thaliana (Mouse-ear cress)	3702
High	Master Protein	GLYMA_12G058500	PF00582 - Universal stress protein family (Usp) (1 of 74)	0	73.221	52	7	30	4	164	17.9	5.91	95.29	7	0	0.847	0.928237	55.49	109	91	29.33	33.97	High	High	High	High	High	High	1		3	3	Present Both	1	GLYMA_12G058500	GLYMA_12G058500	sp|Q8VYN9|PHO32_ARATH	Universal stress protein PHOS32 GN=PHOS32	ident:46/164 pos:80/164 query:164 hit:242 align:153 bit:62.4	Poor_match	Universal stress protein PHOS32	Phosphorylated protein of 32 kDa (AtPHOS32)	PHO32_ARATH	Q8VYN9	Q9LSR2	PHOS32	na	Arabidopsis thaliana (Mouse-ear cress)	3702
High	Master Protein	GLYMA_03G150600	PTHR23115//PTHR23115:SF155 - TRANSLATION FACTOR // SUBFAMILY NOT NAMED (1 of 2)	0	72.985	15	4	15	4	454	49.3	6.87	59.8	4	0	1.046	0.992801	52.23	96.2	103.8	57.28	33.92	High	High	High	High	Peak Found	Peak Found	1		3	3	Present Both	1	GLYMA_03G150600	GLYMA_03G150600	sp|Q9ZT91|EFTM_ARATH	Elongation factor Tu, mitochondrial GN=TUFA	ident:393/454 pos:418/454 query:454 hit:454 align:456 bit:755.0	OK	Elongation factor Tu, mitochondrial	na	EFTM_ARATH	Q9ZT91	Q39206	TUFA	na	Arabidopsis thaliana (Mouse-ear cress)	3702
High	Master Protein	GLYMA_07G225100		0	72.498	36	7	26	2	231	25.7	9.83	88.3	7	0	0.01	1.22204e-16		200		81.14		Peak Found	High	High	High	Not Found	High	1		3	2	Present Both	1	GLYMA_07G225100	GLYMA_07G225100	sp|Q84K90|RHIP1_ARATH	RGS1-HXK1-interacting protein 1 GN=RHIP1	ident:113/231 pos:163/231 query:231 hit:263 align:203 bit:229.6	Poor_match	RGS1-HXK1-interacting protein 1	na	RHIP1_ARATH	Q84K90	O65593	RHIP1	na	Arabidopsis thaliana (Mouse-ear cress)	3702
High	Master Protein	GLYMA_05G214200	K02150 - V-type H+-transporting ATPase subunit E (ATPeV1E, ATP6E) (1 of 7)	0	71.491	37	10	22	1	239	27.6	6.8	61.79	10	0	10.759	2.43716e-05	98.26	17	183		78.13	Peak Found	Not Found	Not Found	High	Peak Found	Not Found	1	Acetyl [N-Term]	1	2	Only Sample	1	GLYMA_05G214200	GLYMA_05G214200	sp|P0CAN7|VATE3_ARATH	V-type proton ATPase subunit E3 GN=VHA-E3	ident:175/239 pos:208/239 query:239 hit:237 align:237 bit:360.9	OK	V-type proton ATPase subunit E3 (V-ATPase subunit E3)	Vacuolar H(+)-ATPase subunit E isoform 3; Vacuolar proton pump subunit E3	VATE3_ARATH	P0CAN7	Q9SH70	VHA-E3	na	Arabidopsis thaliana (Mouse-ear cress)	3702
High	Master Protein	GLYMA_08G024100	PTHR12446 - TESMIN/TSO1-RELATED (1 of 15)	0	71.415	26	4	23	4	130	13.8	8.48	90.92	4	0	0.938	0.978902	71.78	82.5	117.5	52.61	51.16	High	High	High	High	High	High	1		3	3	Present Both	1	GLYMA_08G024100	GLYMA_08G024100	sp|O64530|STR1_ARATH	Thiosulfate/3-mercaptopyruvate sulfurtransferase 1, mitochondrial GN=STR1	ident:19/130 pos:34/130 query:130 hit:379 align:81 bit:28.1	Partial_match_hit	Thiosulfate/3-mercaptopyruvate sulfurtransferase 1, mitochondrial	AtMST1; Rhodanese homolog protein 1 (AtRDH1); Sulfurtransferase 1 (AtStr1)	STR1_ARATH	O64530	A8MSC9; Q9SCY8	STR1	MST1; RDH1; ST1	Arabidopsis thaliana (Mouse-ear cress)	3702
High	Master Protein	GLYMA_10G012800	PTHR34372:SF2 - CYTOCHROME C OXIDASE SUBUNIT 5C-2-RELATED (1 of 3)	0	71.353	91	8	51	4	64	7.1	8.59	130.44	8	0	3.121	0.000905161	98.47	60.6	139.4	59.57	126.5	High	High	High	High	High	High	1		3	3	Present Both	1	GLYMA_10G012800	GLYMA_10G012800	sp|Q9LZQ0|CX5C2_ARATH	Cytochrome c oxidase subunit 5C-2 GN=COX5B-2	ident:54/64 pos:61/64 query:64 hit:64 align:64 bit:116.3	OK	Cytochrome c oxidase subunit 5C-2	Cytochrome c oxidase polypeptide Vc-2	CX5C2_ARATH	Q9LZQ0	Q27GK0; Q84JY6	OrderedLocusNames=At3g62400	na	Arabidopsis thaliana (Mouse-ear cress)	3702
High	Master Protein	GLYMA_09G183300	K02993 - small subunit ribosomal protein S7e (RP-S7e, RPS7) (1 of 6)	0	71.335	32	10	38	2	191	22.1	9.77	124.33	10	1	1.095	0.947586	66.01	115.6	84.4	45.25	41.01	High	High	Not Found	High	High	Not Found	1		2	2	Present Both	1	GLYMA_09G183300	GLYMA_09G183300	sp|Q9M885|RS72_ARATH	40S ribosomal protein S7-2 GN=RPS7B	ident:150/191 pos:169/191 query:191 hit:191 align:191 bit:318.5	OK	40S ribosomal protein S7-2	na	RS72_ARATH	Q9M885	na	RPS7B	na	Arabidopsis thaliana (Mouse-ear cress)	3702
High	Master Protein	GLYMA_05G020300		0	71.25	72	4	36	4	54	6.1	5.11	122.09	4	0	1.173	0.884086	65.83	96.1	103.9	30.95	32.35	High	High	High	High	High	High	1		3	3	Present Both	1	GLYMA_05G020300	GLYMA_05G020300	sp|Q9SD80|TOM5_ARATH	Mitochondrial import receptor subunit TOM5 homolog GN=TOM5	ident:28/54 pos:44/54 query:54 hit:54 align:54 bit:70.1	OK	Mitochondrial import receptor subunit TOM5 homolog	Translocase of outer membrane 5 kDa subunit homolog	TOM5_ARATH	Q9SD80	P83431	TOM5	na	Arabidopsis thaliana (Mouse-ear cress)	3702
High	Master Protein	GLYMA_06G067800	PTHR22951//PTHR22951:SF13 - CLATHRIN ASSEMBLY PROTEIN // SUBFAMILY NOT NAMED (1 of 3)	0	71.195	8	4	24	4	641	70.3	5.73	92.26	4	0	0.79	0.850785	47.34	107.8	92.2	48.12	14.68	High	High	High	High	High	High	1		3	3	Present Both	1	GLYMA_06G067800	GLYMA_06G067800	sp|Q8LF20|CAP2_ARATH	Putative clathrin assembly protein At2g25430 GN=CAO	ident:506/641 pos:559/641 query:641 hit:653 align:669 bit:918.3	OK	Putative clathrin assembly protein At2g25430	na	CAP2_ARATH	Q8LF20	Q9SKK6	OrderedLocusNames=At2g25430	na	Arabidopsis thaliana (Mouse-ear cress)	3702
High	Master Protein	GLYMA_12G032300	PTHR31356:SF9 - L-ASCORBATE PEROXIDASE 3, PEROXISOMAL (1 of 2)	0	70.814	30	7	25	7	287	31.7	6.74	75.9	7	0	0.771	0.800337	35.94	122.8	77.2	11.9	38.05	High	High	High	High	High	High	1		3	3	Present Both	1	GLYMA_12G032300	GLYMA_12G032300	sp|Q42564|APX3_ARATH	L-ascorbate peroxidase 3 GN=APX3	ident:227/287 pos:251/287 query:287 hit:287 align:288 bit:452.2	OK	L-ascorbate peroxidase 3 (AtAPx03)	na	APX3_ARATH	Q42564	O81810	APX3	APX; APXIII	Arabidopsis thaliana (Mouse-ear cress)	3702
High	Master Protein	GLYMA_04G230700		0	70.59	69	3	30	2	72	8.2	7.52	117	3	2	1.479	0.536621	68.98	78.5	121.5	29.11	15.52	High	High	High	High	High	High	1		3	3	Present Both	1	GLYMA_04G230700	GLYMA_04G230700	sp|Q9C9I8|ERF20_ARATH	Ethylene-responsive transcription factor ERF020 GN=ERF020	ident:16/72 pos:21/72 query:72 hit:143 align:40 bit:28.1	Partial_match_hit	Ethylene-responsive transcription factor ERF020	na	ERF20_ARATH	Q9C9I8	na	ERF020	na	Arabidopsis thaliana (Mouse-ear cress)	3702
High	Master Protein	GLYMA_12G066300		0	70.544	64	8	33	2	67	7.8	10.61	105.15	8	5	2.029	0.0977337	55.25	71.3	128.7	64.58	72.56	High	High	Not Found	High	High	Peak Found	1		2	3	Present Both	1	GLYMA_12G066300	GLYMA_12G066300	sp|Q8W037|NIP21_ARATH	Aquaporin NIP2-1 GN=NIP2-1	ident:18/67 pos:28/67 query:67 hit:288 align:49 bit:30.4	Partial_match_hit	Aquaporin NIP2-1	NOD26-like intrinsic protein 2-1 (AtNIP2;1); Nodulin-26-like major intrinsic protein 4 (NodLikeMip4; Protein NLM4)	NIP21_ARATH	Q8W037	O64706; Q1ECK8	NIP2-1	NLM4	Arabidopsis thaliana (Mouse-ear cress)	3702
High	Master Protein	GLYMA_03G013400	PF03766 - Remorin, N-terminal region (Remorin_N) (1 of 8)	0	70.414	45	11	31	4	200	22	6.83	87.23	11	0	0.903	0.96678	24.41	98.1	101.9	11.86	42.05	High	Peak Found	High	High	High	High	1		3	3	Present Both	1	GLYMA_03G013400	GLYMA_03G013400	sp|Q9M2D8|Y3126_ARATH	Uncharacterized protein At3g61260 GN=CBSDUF4	ident:102/200 pos:124/200 query:200 hit:212 align:161 bit:193.7	OK	Uncharacterized protein At3g61260	na	Y3126_ARATH	Q9M2D8	na	OrderedLocusNames=At3g61260	na	Arabidopsis thaliana (Mouse-ear cress)	3702
High	Master Protein	GLYMA_09G248700	PTHR21397 - NUCLEIC ACID BINGING PROTEIN (1 of 2)	0	70.258	29	7	24	2	296	32.5	6.44	75.95	7	0	1.183	0.912241	48.71	75.2	124.8	41.42	21.56	High	High	High	High	Peak Found	High	1		3	3	Present Both	1	GLYMA_09G248700	GLYMA_09G248700	sp|F4IME2|MSL8_ARATH	Mechanosensitive ion channel protein 8 GN=MSL8	ident:20/296 pos:31/296 query:296 hit:908 align:58 bit:28.1	Partial_match_both	Mechanosensitive ion channel protein 8	Mechanosensitive channel of small conductance-like 8; MscS-Like protein 8	MSL8_ARATH	F4IME2	na	MSL8	na	Arabidopsis thaliana (Mouse-ear cress)	3702
High	Master Protein	GLYMA_09G045000	K02971 - small subunit ribosomal protein S21e (RP-S21e, RPS21) (1 of 3)	0	69.13	39	4	30	4	82	9.2	7.39	104.36	4	0	1.578	0.436959	43.78	70	130	25.52	53.09	High	High	High	High	High	High	1	Acetyl [N-Term]	3	3	Present Both	1	GLYMA_09G045000	GLYMA_09G045000	sp|Q3E902|RS212_ARATH	40S ribosomal protein S21-2 GN=RPS21C	ident:68/82 pos:76/82 query:82 hit:82 align:81 bit:154.5	OK	40S ribosomal protein S21-2	na	RS212_ARATH	Q3E902	A0JPY2; F4K4E1	RPS21C	na	Arabidopsis thaliana (Mouse-ear cress)	3702
High	Master Protein	GLYMA_07G092900	K02993 - small subunit ribosomal protein S7e (RP-S7e, RPS7) (1 of 6)	0	67.875	27	8	24	2	191	22	9.77	101.91	8	0	0.806	0.858577	0	127	73	56.14		High	High	Not Found	Not Found	Peak Found	Not Found	1		2	1	Only Control	1	GLYMA_07G092900	GLYMA_07G092900	sp|Q9M885|RS72_ARATH	40S ribosomal protein S7-2 GN=RPS7B	ident:150/191 pos:169/191 query:191 hit:191 align:191 bit:318.2	OK	40S ribosomal protein S7-2	na	RS72_ARATH	Q9M885	na	RPS7B	na	Arabidopsis thaliana (Mouse-ear cress)	3702
High	Master Protein	GLYMA_06G166600	K17780 - mitochondrial import inner membrane translocase subunit TIM8 (TIM8) (1 of 2)	0	67.725	53	6	28	2	78	8.9	5.01	63.49	6	9	2.547	0.0112943	114.42	57.3	142.7	120.49	91.8	Not Found	Not Found	High	Not Found	Not Found	High	1	Acetyl [N-Term]	1	1	Missing Both	1	GLYMA_06G166600	GLYMA_06G166600	sp|Q9XGY4|TIM8_ARATH	Mitochondrial import inner membrane translocase subunit TIM8 GN=TIM8	ident:49/78 pos:65/78 query:78 hit:77 align:74 bit:95.5	OK	Mitochondrial import inner membrane translocase subunit TIM8	na	TIM8_ARATH	Q9XGY4	na	TIM8	na	Arabidopsis thaliana (Mouse-ear cress)	3702
High	Master Protein	GLYMA_10G189500	PTHR24012:SF308 - PROTEIN Y55F3AM.3, ISOFORM A (1 of 2)	0	67.578	16	8	24	2	471	47.5	7.55	82.05	8	0	1.224	0.869416	41.14	90.3	109.7	19.49	19.25	High	High	Peak Found	High	Peak Found	Not Found	1		3	2	Present Both	1	GLYMA_10G189500	GLYMA_10G189500	sp|Q8W034|RNP1_ARATH	Heterogeneous nuclear ribonucleoprotein 1 GN=RNP1	ident:233/471 pos:271/471 query:471 hit:411 align:388 bit:340.9	Poor_match	Heterogeneous nuclear ribonucleoprotein 1 (hnRNP1)	na	RNP1_ARATH	Q8W034	O23288	RNP1	na	Arabidopsis thaliana (Mouse-ear cress)	3702
High	Master Protein	GLYMA_06G185600	K03946 - NADH dehydrogenase (ubiquinone) 1 alpha subcomplex subunit 2 (NDUFA2) (1 of 2)	0	67.404	53	8	37	3	98	11	9.36	119.72	8	0	1.776	0.394844	91.44	69	131	74.07	50.04	High	Peak Found	High	High	High	High	1		3	3	Present Both	1	GLYMA_06G185600	GLYMA_06G185600	sp|Q9FIJ2|NDUA2_ARATH	NADH dehydrogenase [ubiquinone] 1 alpha subcomplex subunit 2 GN=NDB1	ident:66/98 pos:84/98 query:98 hit:97 align:95 bit:151.0	OK	NADH dehydrogenase [ubiquinone] 1 alpha subcomplex subunit 2	na	NDUA2_ARATH	Q9FIJ2	na	OrderedLocusNames=At5g47890	na	Arabidopsis thaliana (Mouse-ear cress)	3702
High	Master Protein	GLYMA_13G127400	K03953 - NADH dehydrogenase (ubiquinone) 1 alpha subcomplex subunit 9 (NDUFA9) (1 of 1)	0	67.345	21	9	24	9	429	47.8	9.45	66.42	9	0	0.982	0.999087	39.15	103.5	96.5	13.24	14.46	High	High	High	High	High	High	1		3	3	Present Both	1	GLYMA_13G127400	GLYMA_13G127400	sp|Q9SK66|NDUA9_ARATH	NADH dehydrogenase [ubiquinone] 1 alpha subcomplex subunit 9, mitochondrial GN=NCED9	ident:294/429 pos:352/429 query:429 hit:402 align:435 bit:582.8	OK	NADH dehydrogenase [ubiquinone] 1 alpha subcomplex subunit 9, mitochondrial	na	NDUA9_ARATH	Q9SK66	B9DHU2; Q93VY5	OrderedLocusNames=At2g20360	na	Arabidopsis thaliana (Mouse-ear cress)	3702
High	Master Protein	GLYMA_19G020000	PTHR10264//PTHR10264:SF93 - BAND 7 PROTEIN-RELATED // SUBFAMILY NOT NAMED (1 of 7)	0	67.223	17	6	25	1	286	31.5	5.24	86.41	6	0	0.01	1.22204e-16		200		9.19		High	High	High	Not Found	Not Found	High	1		3	1	Only Control	1	GLYMA_19G020000	GLYMA_19G020000	sp|Q9FM19|HIR1_ARATH	Hypersensitive-induced response protein 1 GN=HIR1	ident:242/286 pos:265/286 query:286 hit:286 align:284 bit:506.1	OK	Hypersensitive-induced response protein 1 (AtHIR1)	na	HIR1_ARATH	Q9FM19	na	HIR1	na	Arabidopsis thaliana (Mouse-ear cress)	3702
High	Master Protein	GLYMA_13G148400	PTHR10516:SF323 - PEPTIDYL-PROLYL CIS-TRANS ISOMERASE FKBP16-4, CHLOROPLASTIC (1 of 2)	0	66.266	51	9	38	9	194	20.8	9.5	107.61	9	0	0.795	0.854328	32.87	115	85	38.57	20.32	High	High	High	High	High	High	1		3	3	Present Both	1	GLYMA_13G148400	GLYMA_13G148400	sp|Q9SR70|FK164_ARATH	Peptidyl-prolyl cis-trans isomerase FKBP16-4, chloroplastic GN=FKBP16-4	ident:146/194 pos:160/194 query:194 hit:230 align:177 bit:301.2	OK	Peptidyl-prolyl cis-trans isomerase FKBP16-4, chloroplastic (PPIase FKBP16-4)	FK506-binding protein 16-4 (AtFKBP16-4); Immunophilin FKBP16-4; Rotamase	FK164_ARATH	Q9SR70	na	FKBP16-4	FKBP24-2	Arabidopsis thaliana (Mouse-ear cress)	3702
High	Master Protein	GLYMA_11G143200		0	65.906	78	8	28	2	55	6.5	10.45	85.33	8	0	1.222	0.819117	82.94	104.8	95.2	31.49	63.58	Peak Found	Peak Found	Peak Found	High	Peak Found	High	1		3	3	Present Both	1	GLYMA_11G143200	GLYMA_11G143200	sp|Q8W037|NIP21_ARATH	Aquaporin NIP2-1 GN=NIP2-1	ident:16/55 pos:24/55 query:55 hit:288 align:44 bit:25.4	Partial_match_hit	Aquaporin NIP2-1	NOD26-like intrinsic protein 2-1 (AtNIP2;1); Nodulin-26-like major intrinsic protein 4 (NodLikeMip4; Protein NLM4)	NIP21_ARATH	Q8W037	O64706; Q1ECK8	NIP2-1	NLM4	Arabidopsis thaliana (Mouse-ear cress)	3702
High	Master Protein	GLYMA_04G225600	PTHR14110//PTHR14110:SF6 - MITOCHONDRIAL IMPORT INNER MEMBRANE TRANSLOCASE SUBUNIT TIM22 // SUBFAMILY NOT NAMED (1 of 2)	0	65.624	37	11	29	4	260	27.7	9.89	92.37	11	0	0.57	0.332912	38.36	151.5	48.5	13.69	96.4	High	High	High	Peak Found	Peak Found	High	1		3	3	Present Both	1	GLYMA_04G225600	GLYMA_04G225600	sp|Q9FLT9|HP302_ARATH	Chloroplastic import inner membrane translocase subunit HP30-2 GN=HP30-2	ident:158/260 pos:185/260 query:260 hit:259 align:244 bit:318.5	OK	Chloroplastic import inner membrane translocase subunit HP30-2	Hypothetical inner plastid envelope protein of 30 kDa 2 (AtHP30-2; Hypothetical protein 30-2)	HP302_ARATH	Q9FLT9	Q8L9N9	HP30-2	na	Arabidopsis thaliana (Mouse-ear cress)	3702
High	Master Protein	GLYMA_09G243200	K13199 - plasminogen activator inhibitor 1 RNA-binding protein (SERBP1) (1 of 5)	0	65.159	34	8	21	3	367	39.4	6.19	71	8	0	1.678	0.607421	92.16	88.7	111.3	85.34	59.04	High	High	Peak Found	High	Peak Found	High	1		3	3	Present Both	1	GLYMA_09G243200	GLYMA_09G243200	sp|O23593|RGGB_ARATH	RGG repeats nuclear RNA binding protein B GN=RGGB	ident:192/367 pos:241/367 query:367 hit:360 align:385 bit:272.3	OK	RGG repeats nuclear RNA binding protein B	na	RGGB_ARATH	O23593	Q8LB56	RGGB	na	Arabidopsis thaliana (Mouse-ear cress)	3702
High	Master Protein	GLYMA_06G141900		0	64.509	87	6	35	4	52	5.8	9.7	116.11	6	2	0.998	0.99396	51.75	78.1	121.9	62.34	38.38	High	High	High	High	High	High	1		3	3	Present Both	1	GLYMA_06G141900	GLYMA_06G141900	sp|Q9SYK4|IP5PD_ARATH	Type I inositol polyphosphate 5-phosphatase 13 GN=IP5P13	ident:11/52 pos:18/52 query:52 hit:1136 align:32 bit:24.6	Partial_match_hit	Type I inositol polyphosphate 5-phosphatase 13 (At5PTase13)	na	IP5PD_ARATH	Q9SYK4	F4IAA0; Q712D7	IP5P13	na	Arabidopsis thaliana (Mouse-ear cress)	3702
High	Master Protein	GLYMA_03G086100	K09569 - FK506-binding protein 2 [EC:5.2.1.8] (FKBP2) (1 of 2)	0	63.896	56	7	30	3	147	16	6.79	106.44	7	4	1.46	0.566256	93.87	89.3	110.7	97.57	106.96	High	High	High	High	Peak Found	High	1		3	3	Present Both	1	GLYMA_03G086100	GLYMA_03G086100	sp|Q38936|FK152_ARATH	Peptidyl-prolyl cis-trans isomerase FKBP15-2 GN=FKBP15-2	ident:106/147 pos:120/147 query:147 hit:163 align:137 bit:223.0	OK	Peptidyl-prolyl cis-trans isomerase FKBP15-2 (PPIase FKBP15-2)	15 kDa FK506-binding protein (15 kDa FKBP); FK506-binding protein 15-2 (AtFKBP15-2); FK506-binding protein 2-2; Immunophilin FKBP15-2; Rotamase	FK152_ARATH	Q38936	Q9FJL2	FKBP15-2	na	Arabidopsis thaliana (Mouse-ear cress)	3702
High	Master Protein	GLYMA_08G343100	PTHR23426:SF30 - ADRENODOXIN-LIKE PROTEIN, MITOCHONDRIAL (1 of 2)	0	63.863	30	6	21	6	158	17.5	7.94	81.62	6	0	1.109	0.941298	48.45	95.3	104.7	28.49	25.88	High	High	High	High	High	High	1		3	3	Present Both	1	GLYMA_08G343100	GLYMA_08G343100	sp|O64948|LONP2_ARATH	Lon protease homolog 2, peroxisomal GN=LON2	ident:30/158 pos:53/158 query:158 hit:888 align:121 bit:33.9	Partial_match_hit	Lon protease homolog 2, peroxisomal	na	LONP2_ARATH	O64948	Q8GT60	LON2	na	Arabidopsis thaliana (Mouse-ear cress)	3702
High	Master Protein	GLYMA_13G339700	PTHR11038//PTHR11038:SF17 - MITOCHONDRIAL IMPORT INNER MEMBRANE TRANSLOCASE SUBUNIT TIM10 // SUBFAMILY NOT NAMED (1 of 1)	0	63.846	46	3	27	1	84	9.7	7.05	103.47	3	0	2.226	0.0428488	73.53	69.4	130.6	51.21	55.11	High	High	High	High	High	High	1		3	3	Present Both	1	GLYMA_13G339700	GLYMA_13G339700	sp|Q9ZW33|TIM10_ARATH	Mitochondrial import inner membrane translocase subunit TIM10 GN=TIM10	ident:60/84 pos:69/84 query:84 hit:83 align:84 bit:132.5	OK	Mitochondrial import inner membrane translocase subunit TIM10	na	TIM10_ARATH	Q9ZW33	na	TIM10	na	Arabidopsis thaliana (Mouse-ear cress)	3702
High	Master Protein	GLYMA_18G019700	K12875 - apoptotic chromatin condensation inducer in the nucleus (ACIN1, ACINUS) (1 of 2)	0	63.643	12	6	17	4	708	78	4.74	78.92	6	1	0.505	0.167605	10.37	135.1	64.9	45.28	21.73	High	High	High	Peak Found	Peak Found	High	1	Phospho [S657]	3	3	Present Both	1	GLYMA_18G019700	GLYMA_18G019700	sp|Q9SG79|SUN2_ARATH	SUN domain-containing protein 2 GN=SUN2	ident:17/708 pos:30/708 query:708 hit:455 align:51 bit:30.8	Partial_match_both	SUN domain-containing protein 2 (AtSUN2)	na	SUN2_ARATH	Q9SG79	Q8L9I5	SUN2	na	Arabidopsis thaliana (Mouse-ear cress)	3702
High	Master Protein	GLYMA_12G207600	PTHR32077:SF6 - FASCICLIN-LIKE ARABINOGALACTAN PROTEIN 13-RELATED (1 of 2)	0	63.489	40	7	28	7	250	26.3	9.11	98.62	7	0	0.549	0.268377	15.74	149.2	50.8	11.05	49.54	High	High	High	High	High	High	1		3	3	Present Both	1	GLYMA_12G207600	GLYMA_12G207600	sp|Q9ZWA8|FLA9_ARATH	Fasciclin-like arabinogalactan protein 9 GN=FLA9	ident:116/250 pos:152/250 query:250 hit:247 align:215 bit:218.4	Poor_match	Fasciclin-like arabinogalactan protein 9	na	FLA9_ARATH	Q9ZWA8	Q8H794	FLA9	na	Arabidopsis thaliana (Mouse-ear cress)	3702
High	Master Protein	GLYMA_02G050600	PF11833 - Protein of unknown function (DUF3353) (DUF3353) (1 of 7)	0	63.078	18	6	26	6	281	31.4	10.08	88.31	6	0	0.674	0.609106	19.38	124.9	75.1	47.81	37.64	High	High	High	High	High	High	1		3	3	Present Both	1	GLYMA_02G050600	GLYMA_02G050600	sp|Q9FN50|CPP1_ARATH	Protein CHAPERONE-LIKE PROTEIN OF POR1, chloroplastic GN=CPP1	ident:92/281 pos:146/281 query:281 hit:258 align:240 bit:166.0	Poor_match	Protein CHAPERONE-LIKE PROTEIN OF POR1, chloroplastic (AtCPP1)	Protein CELL GROWTH DEFECT FACTOR 1 (AtCDF1)	CPP1_ARATH	Q9FN50	na	CPP1	na	Arabidopsis thaliana (Mouse-ear cress)	3702
High	Master Protein	GLYMA_18G244000	PTHR21397 - NUCLEIC ACID BINGING PROTEIN (1 of 2)	0	62.934	27	8	33	3	297	32.7	6.7	113.43	8	5	1.575	0.439533	41.96	67.7	132.3	26.25	17.5	High	High	High	High	High	High	1		3	3	Present Both	1	GLYMA_18G244000	GLYMA_18G244000	sp|Q1G391|FB217_ARATH	F-box protein At4g00893 GN=FAMT	ident:14/297 pos:16/297 query:297 hit:388 align:23 bit:30.8	Partial_match_both	F-box protein At4g00893	na	FB217_ARATH	Q1G391	na	OrderedLocusNames=At4g00893	na	Arabidopsis thaliana (Mouse-ear cress)	3702
High	Master Protein	GLYMA_12G024700	PTHR11071:SF252 - PEPTIDYL-PROLYL CIS-TRANS ISOMERASE CYP18-3-RELATED (1 of 4)	0	62.883	31	4	21	2	172	18.1	7.83	60.67	4	0	1.007	0.984004	61.23	85.8	114.2	41.31	8.24	High	High	High	High	High	High	1		3	3	Present Both	1	GLYMA_12G024700	GLYMA_12G024700	sp|Q38900|CP19A_ARATH	Peptidyl-prolyl cis-trans isomerase CYP19-1 GN=CYP19-1	ident:144/172 pos:158/172 query:172 hit:173 align:170 bit:312.0	OK	Peptidyl-prolyl cis-trans isomerase CYP19-1 (PPIase CYP19-1)	Cyclophilin of 19 kDa 1; Rotamase cyclophilin-3	CP19A_ARATH	Q38900	F4IL99	CYP19-1	ROC3	Arabidopsis thaliana (Mouse-ear cress)	3702
High	Master Protein	GLYMA_03G082300	K17777 - mitochondrial import inner membrane translocase subunit TIM9 (TIM9) (1 of 3)	0	62.846	67	6	42	6	94	11.1	7.74	133.82	6	0	0.917	0.974214	58.06	116.3	83.7	28.14	21.73	High	High	High	High	High	High	1	Acetyl [N-Term]	3	3	Present Both	1	GLYMA_03G082300	GLYMA_03G082300	sp|Q9XGX9|TIM9_ARATH	Mitochondrial import inner membrane translocase subunit TIM9 GN=TIM9	ident:57/94 pos:80/94 query:94 hit:93 align:93 bit:132.9	OK	Mitochondrial import inner membrane translocase subunit TIM9	Protein EMBRYO DEFECTIVE 2474	TIM9_ARATH	Q9XGX9	Q8L927; Q9SNC2	TIM9	EMB2474	Arabidopsis thaliana (Mouse-ear cress)	3702
High	Master Protein	GLYMA_05G225000	K01412 - mitochondrial-processing peptidase subunit alpha [EC:3.4.24.64] (PMPCA, MAS2) (1 of 6)	0	62.818	20	9	27	3	511	55.1	5.94	79.31	9	0	0.636	0.526607	23.54	131.4	68.6	11.21	12.21	High	High	Not Found	High	Peak Found	Peak Found	1		2	3	Present Both	1	GLYMA_05G225000	GLYMA_05G225000	sp|Q9ZU25|MPPA1_ARATH	Probable mitochondrial-processing peptidase subunit alpha-1, mitochondrial GN=MORF9	ident:330/511 pos:396/511 query:511 hit:503 align:510 bit:629.0	OK	Probable mitochondrial-processing peptidase subunit alpha-1, mitochondrial	Alpha-MPP 1	MPPA1_ARATH	Q9ZU25	Q0WW81; Q8L9K3	OrderedLocusNames=At1g51980	na	Arabidopsis thaliana (Mouse-ear cress)	3702
High	Master Protein	GLYMA_13G285600	PTHR12903:SF1 - 50S RIBOSOMAL PROTEIN L24, CHLOROPLASTIC (1 of 2)	0	62.768	30	7	29	4	194	21.5	9.91	99.65	7	3	0.832	0.912241	27.26	139.5	60.5	65.73	52.04	High	High	Peak Found	High	High	High	1		3	3	Present Both	1	GLYMA_13G285600	GLYMA_13G285600	sp|P92959|RK24_ARATH	50S ribosomal protein L24, chloroplastic GN=RPL24	ident:122/194 pos:147/194 query:194 hit:198 align:174 bit:256.5	OK	50S ribosomal protein L24, chloroplastic	CL24; Protein SUPPRESSOR OF VARIEGATION 8	RK24_ARATH	P92959	Q9FIU4	RPL24	SVR8	Arabidopsis thaliana (Mouse-ear cress)	3702
High	Master Protein	GLYMA_07G114600	K13199 - plasminogen activator inhibitor 1 RNA-binding protein (SERBP1) (1 of 5)	0	62.631	22	5	18	2	368	39.3	6.19	77.19	5	3	1.127	0.928237	24.58	86.8	113.2	27.76	31.5	High	High	High	High	Peak Found	High	1		3	3	Present Both	1	GLYMA_07G114600	GLYMA_07G114600	sp|O23593|RGGB_ARATH	RGG repeats nuclear RNA binding protein B GN=RGGB	ident:186/368 pos:228/368 query:368 hit:360 align:391 bit:269.6	Poor_match	RGG repeats nuclear RNA binding protein B	na	RGGB_ARATH	O23593	Q8LB56	RGGB	na	Arabidopsis thaliana (Mouse-ear cress)	3702
High	Master Protein	GLYMA_04G178100	PF06522 - NADH-ubiquinone reductase complex 1 MLRQ subunit (B12D) (1 of 6)	0	62.405	46	5	17	1	89	10.1	9.35	101.72	5	3	1.037	0.974214	43.84	106.8	93.2	13.29	4.39	Peak Found	Not Found	Not Found	High	Peak Found	Not Found	1		1	2	Only Sample	1	GLYMA_04G178100	GLYMA_04G178100	sp|Q9MA15|AB1K3_ARATH	Protein ACTIVITY OF BC1 COMPLEX KINASE 3, chloroplastic GN=ABC1K3	ident:17/89 pos:24/89 query:89 hit:711 align:53 bit:25.4	Partial_match_hit	Protein ACTIVITY OF BC1 COMPLEX KINASE 3, chloroplastic (ABC1-LIKE KINASE 3)	Protein REPRESSOR OF BDR1	AB1K3_ARATH	Q9MA15	Q94BV0	ABC1K3	na	Arabidopsis thaliana (Mouse-ear cress)	3702
High	Master Protein	GLYMA_02G309500	K08909 - light-harvesting complex I chlorophyll a/b binding protein 3 (LHCA3) (1 of 2)	0	62.1	35	6	39	6	276	29.8	8.66	119.17	6	0	0.74	0.740874	23.68	132.3	67.7	31.93	17.93	High	High	High	High	High	High	1		3	3	Present Both	1	GLYMA_02G309500	GLYMA_02G309500	sp|Q9SY97|LHCA3_ARATH	Photosystem I chlorophyll a/b-binding protein 3-1, chloroplastic GN=LHCA3	ident:232/276 pos:249/276 query:276 hit:273 align:276 bit:454.9	OK	Photosystem I chlorophyll a/b-binding protein 3-1, chloroplastic (Lhca3*1)	LHCI type III LHCA3	LHCA3_ARATH	Q9SY97	Q0WR83; Q2V2R9; Q43381; Q8LCR7	LHCA3	na	Arabidopsis thaliana (Mouse-ear cress)	3702
High	Master Protein	GLYMA_03G088900	PTHR23130:SF95 - AUXIN-RESPONSIVE PROTEIN-RELATED (1 of 3)	0	61.714	20	3	31	3	244	25.6	7.5	124.88	3	0	0.935	0.97712	44.36	95.7	104.3	14.62	19.31	High	High	High	High	High	High	1		3	3	Present Both	1	GLYMA_03G088900	GLYMA_03G088900	sp|Q94BT2|AIR12_ARATH	Auxin-induced in root cultures protein 12 GN=AIR12	ident:82/244 pos:117/244 query:244 hit:252 align:213 bit:129.0	Poor_match	Auxin-induced in root cultures protein 12	na	AIR12_ARATH	Q94BT2	F4JEF2; O82442; Q9SRS7	AIR12	na	Arabidopsis thaliana (Mouse-ear cress)	3702
High	Master Protein	GLYMA_10G256000	PF05479 - Photosystem I reaction centre subunit N (PSAN or PSI-N) (PsaN) (1 of 3)	0	61.621	29	6	21	6	136	15.4	9.67	63.51	6	0	0.594	0.408689	24	115.6	84.4	81.32	45.25	High	High	High	High	High	High	1		3	3	Present Both	1	GLYMA_10G256000	GLYMA_10G256000	sp|P49107|PSAN_ARATH	Photosystem I reaction center subunit N, chloroplastic GN=PSAN	ident:19/136 pos:35/136 query:136 hit:171 align:67 bit:32.3	Partial_match_both	Photosystem I reaction center subunit N, chloroplastic (PSI-N)	na	PSAN_ARATH	P49107	Q2V2V9	PSAN	na	Arabidopsis thaliana (Mouse-ear cress)	3702
High	Master Protein	GLYMA_01G228400	K11352 - NADH dehydrogenase (ubiquinone) 1 alpha subcomplex subunit 12 (NDUFA12) (1 of 2)	0	61.003	67	10	32	1	156	18.1	9.03	78.61	10	0	0.01	1.22204e-16		200				Not Found	High	Not Found	Not Found	Not Found	Not Found	1		1	0	Missing Both	1	GLYMA_01G228400	GLYMA_01G228400	sp|Q9M9M9|NDUAC_ARATH	Probable NADH dehydrogenase [ubiquinone] 1 alpha subcomplex subunit 12 GN=CBP20	ident:122/156 pos:138/156 query:156 hit:159 align:150 bit:274.2	OK	Probable NADH dehydrogenase [ubiquinone] 1 alpha subcomplex subunit 12	na	NDUAC_ARATH	Q9M9M9	na	OrderedLocusNames=At3g03100	na	Arabidopsis thaliana (Mouse-ear cress)	3702
High	Master Protein	GLYMA_14G140900	PTHR31236:SF2 - DEHYDRATION-RESPONSIVE PROTEIN RD22 (1 of 11)	0	60.907	26	7	14	3	349	38	6.52	53.61	7	0	0.01	1.22204e-16		200		5.53		High	High	High	Not Found	Not Found	Not Found	1		3	0	Only Control	1	GLYMA_14G140900	GLYMA_14G140900	sp|Q08298|RD22_ARATH	BURP domain protein RD22 GN=RD22	ident:197/349 pos:247/349 query:349 hit:392 align:390 bit:363.2	OK	BURP domain protein RD22	Dehydration-responsive protein RD22	RD22_ARATH	Q08298	Q56WL9	RD22	na	Arabidopsis thaliana (Mouse-ear cress)	3702
High	Master Protein	GLYMA_09G035300	KOG3450 - Huntingtin interacting protein HYPK (1 of 4)	0	60.691	64	5	25	4	110	12.2	5.07	95.56	5	1	1.79	0.205617	95.46	45.3	154.7	11.02	63.04	High	High	Peak Found	High	High	High	1	Acetyl [N-Term]	3	3	Present Both	1	GLYMA_09G035300	GLYMA_09G035300	sp|Q9M3D6|AB19G_ARATH	ABC transporter G family member 19 GN=ABCG19	ident:16/110 pos:26/110 query:110 hit:725 align:51 bit:27.3	Partial_match_both	ABC transporter G family member 19 (ABC transporter ABCG.19; AtABCG19)	White-brown complex homolog protein 19 (AtWBC19)	AB19G_ARATH	Q9M3D6	na	ABCG19	WBC19	Arabidopsis thaliana (Mouse-ear cress)	3702
High	Master Protein	GLYMA_19G193200	K02943 - large subunit ribosomal protein LP2 (RP-LP2, RPLP2) (1 of 6)	0	60.475	54	6	20	4	113	11.2	4.41	87.48	6	2	1.725	0.317307	39.78	75	125	26.15	33.07	High	High	Peak Found	High	Peak Found	High	1		3	3	Present Both	1	GLYMA_19G193200	GLYMA_19G193200	sp|Q9LXM8|RLA24_ARATH	60S acidic ribosomal protein P2-4 GN=RPP2D	ident:76/113 pos:88/113 query:113 hit:111 align:113 bit:107.1	OK	60S acidic ribosomal protein P2-4	na	RLA24_ARATH	Q9LXM8	na	RPP2D	na	Arabidopsis thaliana (Mouse-ear cress)	3702
High	Master Protein	GLYMA_09G177500	KOG4012 - Histone H1 (1 of 1)	0	60.427	24	8	16	8	497	53.4	10.39	49.48	8	0	0.694	0.655258	35.36	131.5	68.5	63.87	78.61	High	High	High	High	High	High	1		3	3	Present Both	1	GLYMA_09G177500	GLYMA_09G177500	sp|Q43386|HMGYA_ARATH	HMG-Y-related protein A GN=HMGA	ident:34/497 pos:44/497 query:497 hit:204 align:67 bit:73.6	Partial_match_both	HMG-Y-related protein A (AtHMGA)	High mobility group A protein	HMGYA_ARATH	Q43386	P92954; Q8LGC1	HMGA	na	Arabidopsis thaliana (Mouse-ear cress)	3702
High	Master Protein	GLYMA_19G007800	PTHR22939:SF81 - PROTEASE DO-LIKE 1, CHLOROPLASTIC (1 of 2)	0	60.069	26	7	24	7	431	45.6	7.11	86.11	7	0	0.903	0.969121	61.63	132.2	67.8	66.05	68.14	High	High	High	High	High	High	1		3	3	Present Both	1	GLYMA_19G007800	GLYMA_19G007800	sp|O22609|DEGP1_ARATH	Protease Do-like 1, chloroplastic GN=DEGP1	ident:322/431 pos:344/431 query:431 hit:439 align:360 bit:647.5	OK	Protease Do-like 1, chloroplastic	Protein DEGRADATION OF PERIPLASMIC PROTEINS 1 (DEGP PROTEASE 1)	DEGP1_ARATH	O22609	Q94BX6; Q9LK85	DEGP1	DEG1; DEGP	Arabidopsis thaliana (Mouse-ear cress)	3702
High	Master Protein	GLYMA_09G091000	PTHR12964 - NADH-UBIQUINONE OXIDOREDUCTASE B14 SUBUNIT (1 of 3)	0	60.046	41	7	43	1	150	17.1	7.81	117	7	0	1.387	0.92428	13.51	49.4	150.6	53.46		High	Peak Found	High	High	Not Found	High	1		3	2	Present Both	1	GLYMA_09G091000	GLYMA_09G091000	sp|Q9LHI0|NDUA6_ARATH	NADH dehydrogenase [ubiquinone] 1 alpha subcomplex subunit 6 GN=NDC80	ident:44/150 pos:58/150 query:150 hit:133 align:70 bit:102.4	Partial_match_query	NADH dehydrogenase [ubiquinone] 1 alpha subcomplex subunit 6	na	NDUA6_ARATH	Q9LHI0	na	OrderedLocusNames=At3g12260	na	Arabidopsis thaliana (Mouse-ear cress)	3702
High	Master Protein	GLYMA_20G225900	K11275 - histone H1/5 (H1_5) (1 of 6)	0	59.307	12	2	10	2	190	19.8	10.92	58.36	2	0	1.232	0.856954	41.93	93.1	106.9	45.54	69.99	High	High	Peak Found	High	High	Peak Found	1		3	3	Present Both	1	GLYMA_20G225900	GLYMA_20G225900	sp|P26569|H12_ARATH	Histone H1.2 GN=GPT2	ident:70/190 pos:83/190 query:190 hit:273 align:133 bit:110.5	Partial_match_hit	Histone H1.2	na	H12_ARATH	P26569	na	OrderedLocusNames=At2g30620	na	Arabidopsis thaliana (Mouse-ear cress)	3702
High	Master Protein	GLYMA_04G002300	PTHR11229:SF5 - 50S RIBOSOMAL PROTEIN L3-1, CHLOROPLASTIC (1 of 2)	0	59.213	37	8	18	8	263	28.8	10.45	48.13	8	0	0.829	0.906801	33.18	100.5	99.5	35.3	39.76	High	High	High	High	High	High	1		3	3	Present Both	1	GLYMA_04G002300	GLYMA_04G002300	sp|Q9SKX4|RK3A_ARATH	50S ribosomal protein L3-1, chloroplastic GN=RPL3A	ident:203/263 pos:230/263 query:263 hit:271 align:267 bit:379.4	OK	50S ribosomal protein L3-1, chloroplastic	na	RK3A_ARATH	Q9SKX4	Q8LEQ9	RPL3A	na	Arabidopsis thaliana (Mouse-ear cress)	3702
High	Master Protein	GLYMA_01G172300	PTHR13061//PTHR13061:SF9 - DYNACTIN SUBUNIT P25 // SUBFAMILY NOT NAMED (1 of 4)	0	59.158	30	9	27	2	270	29.3	6.73	85.13	9	0	1.193	0.974214	29.2	82.2	117.8	20.56	81.72	High	Peak Found	High	Peak Found	Peak Found	High	1		3	3	Present Both	1	GLYMA_01G172300	GLYMA_01G172300	sp|Q9FWR5|GCA1_ARATH	Gamma carbonic anhydrase 1, mitochondrial GN=GAMMACA1	ident:212/270 pos:236/270 query:270 hit:275 align:269 bit:441.0	OK	Gamma carbonic anhydrase 1, mitochondrial (AtCA1; GAMMA CA1)	na	GCA1_ARATH	Q9FWR5	Q67XH5; Q682H9; Q8LF67; Q9LN36	GAMMACA1	na	Arabidopsis thaliana (Mouse-ear cress)	3702
High	Master Protein	GLYMA_13G028200	K02703 - photosystem II P680 reaction center D1 protein (psbA) (1 of 3)	0	59.076	8	3	48	3	271	29.8	5.14	148.47	3	0	0.439	0.0546919	14.31	155	45	2.6	60.22	High	High	High	High	High	High	1		3	3	Present Both	1	GLYMA_13G028200	GLYMA_13G028200	sp|P83755|PSBA_ARATH	Photosystem II protein D1 GN=psbA	ident:257/271 pos:263/271 query:271 hit:353 align:295 bit:511.1	OK	Photosystem II protein D1 (PSII D1 protein)	Photosystem II Q(B) protein	PSBA_ARATH	P83755	Q33592	psbA	na	Arabidopsis thaliana (Mouse-ear cress)	3702
High	Master Protein	GLYMA_10G018400	PTHR10366:SF465 - UDP-GLUCURONIC ACID DECARBOXYLASE 1 (1 of 6)	0	59.053	18	8	30	8	427	48	8.92	83.45	8	0	0.942	0.981978	60.49	120.4	79.6	28.3	33.2	High	High	High	High	High	High	1		3	3	Present Both	1	GLYMA_10G018400	GLYMA_10G018400	sp|Q9LZI2|UXS2_ARATH	UDP-glucuronic acid decarboxylase 2 GN=UXS2	ident:356/427 pos:384/427 query:427 hit:445 align:435 bit:723.0	OK	UDP-glucuronic acid decarboxylase 2	UDP-XYL synthase 2; UDP-glucuronate decarboxylase 2 (UGD; UXS-2); dTDP-glucose 4-6-dehydratase homolog D18	UXS2_ARATH	Q9LZI2	Q39077	UXS2	AUD1; D18	Arabidopsis thaliana (Mouse-ear cress)	3702
High	Master Protein	GLYMA_18G217700	K03945 - NADH dehydrogenase (ubiquinone) 1 alpha subcomplex subunit 1 (NDUFA1) (1 of 2)	0	58.913	41	4	31	2	64	7.3	8.92	82.34	4	0	1.461	0.655206	79.52	73.8	126.2	84.14	46.69	High	Peak Found	High	High	High	High	1		3	3	Present Both	1	GLYMA_18G217700	GLYMA_18G217700	sp|Q9C9Z5|NDUA1_ARATH	NADH dehydrogenase [ubiquinone] 1 alpha subcomplex subunit 1 GN=NDT1	ident:48/64 pos:60/64 query:64 hit:65 align:65 bit:107.1	OK	NADH dehydrogenase [ubiquinone] 1 alpha subcomplex subunit 1	na	NDUA1_ARATH	Q9C9Z5	Q84MD9	OrderedLocusNames=At3g08610	na	Arabidopsis thaliana (Mouse-ear cress)	3702
High	Master Protein	GLYMA_13G046200	K01602 - ribulose-bisphosphate carboxylase small chain (rbcS) (1 of 5)	0	58.512	28	7	31	7	178	20	8.66	89.17	7	0	0.988	0.999087	47.56	106.6	93.4	35.21	41.49	High	High	High	High	High	High	1		3	3	Present Both	1	GLYMA_13G046200	GLYMA_13G046200	sp|P10798|RBS3B_ARATH	Ribulose bisphosphate carboxylase small chain 3B, chloroplastic GN=RBCS-3B	ident:143/178 pos:155/178 query:178 hit:181 align:179 bit:302.8	OK	Ribulose bisphosphate carboxylase small chain 3B, chloroplastic (RuBisCO small subunit 3B)	na	RBS3B_ARATH	P10798	Q9FF21	RBCS-3B	ATS3B	Arabidopsis thaliana (Mouse-ear cress)	3702
High	Master Protein	GLYMA_20G176400	PF13414 - TPR repeat (TPR_11) (1 of 152)	0	58.006	19	8	22	8	357	39.7	9.29	68.85	8	0	0.782	0.827194	49.06	131.1	68.9	30.85	33.07	High	High	High	High	High	High	1		3	3	Present Both	1	GLYMA_20G176400	GLYMA_20G176400	sp|B9DHG0|PYG7_ARATH	Tetratricopeptide repeat domain-containing protein PYG7, chloroplastic GN=PYG7	ident:166/357 pos:187/357 query:357 hit:301 align:221 bit:317.0	Poor_match	Tetratricopeptide repeat domain-containing protein PYG7, chloroplastic	Protein PALE YELLOW GREEN 7	PYG7_ARATH	B9DHG0	O80551; Q8LFF4; Q94EJ1	PYG7	na	Arabidopsis thaliana (Mouse-ear cress)	3702
High	Master Protein	GLYMA_19G047300	K02920 - large subunit ribosomal protein L36e (RP-L36e, RPL36) (1 of 4)	0	57.988	41	7	29	2	115	13.3	10.99	82.54	7	5	1.396	0.626606	42.31	87.9	112.1	11.36	7.32	High	Peak Found	Peak Found	High	Peak Found	High	1		3	3	Present Both	1	GLYMA_19G047300	GLYMA_19G047300	sp|Q9LZ57|RL363_ARATH	60S ribosomal protein L36-3 GN=RPL36C	ident:83/115 pos:91/115 query:115 hit:108 align:95 bit:166.0	OK	60S ribosomal protein L36-3	na	RL363_ARATH	Q9LZ57	na	RPL36C	na	Arabidopsis thaliana (Mouse-ear cress)	3702
High	Master Protein	GLYMA_04G132900	K02966 - small subunit ribosomal protein S19e (RP-S19e, RPS19) (1 of 4)	0	57.738	42	7	32	2	143	16	10.24	91.07	7	0	0.579	0.355759	19.36	106.3	93.7	15.24	42.43	High	High	High	High	High	High	1		3	3	Present Both	1	GLYMA_04G132900	GLYMA_04G132900	sp|Q9SGA6|RS191_ARATH	40S ribosomal protein S19-1 GN=RPS19A	ident:123/143 pos:135/143 query:143 hit:143 align:143 bit:268.1	OK	40S ribosomal protein S19-1	na	RS191_ARATH	Q9SGA6	na	RPS19A	na	Arabidopsis thaliana (Mouse-ear cress)	3702
High	Master Protein	GLYMA_03G110300	K13199 - plasminogen activator inhibitor 1 RNA-binding protein (SERBP1) (1 of 5)	0	57.097	15	4	20	1	368	39.1	6.02	78.25	4	0	0.938	0.974214	11.28	99.9	100.1	10.12	11.51	High	High	High	High	High	High	1		3	3	Present Both	1	GLYMA_03G110300	GLYMA_03G110300	sp|O23593|RGGB_ARATH	RGG repeats nuclear RNA binding protein B GN=RGGB	ident:189/368 pos:232/368 query:368 hit:360 align:389 bit:271.9	OK	RGG repeats nuclear RNA binding protein B	na	RGGB_ARATH	O23593	Q8LB56	RGGB	na	Arabidopsis thaliana (Mouse-ear cress)	3702
High	Master Protein	GLYMA_07G239500	KOG3450 - Huntingtin interacting protein HYPK (1 of 4)	0	56.958	33	3	16	2	110	12.3	5.24	74.84	3	0	1.204	0.852529	52.85	111.5	88.5	24.17	24.77	High	High	Not Found	High	High	Not Found	1		2	2	Present Both	1	GLYMA_07G239500	GLYMA_07G239500	sp|Q94JX9|NACA2_ARATH	Nascent polypeptide-associated complex subunit alpha-like protein 2 GN=NAC096	ident:12/110 pos:22/110 query:110 hit:217 align:38 bit:28.1	Partial_match_both	Nascent polypeptide-associated complex subunit alpha-like protein 2 (NAC-alpha-like protein 2)	Alpha-NAC-like protein 2	NACA2_ARATH	Q94JX9	Q9S7G0	OrderedLocusNames=At3g49470	na	Arabidopsis thaliana (Mouse-ear cress)	3702
High	Master Protein	GLYMA_08G170000	K03234 - elongation factor 2 (EEF2) (1 of 3)	0	56.957	8	4	17	4	843	94	6.11	73.87	4	0	1.63	0.343965	96.33	77.9	122.1	13.49	57.42	High	High	High	High	High	High	1		3	3	Present Both	1	GLYMA_08G170000	GLYMA_08G170000	sp|Q9SGT4|EF2_ARATH	Elongation factor 2 GN=LOS1	ident:786/843 pos:817/843 query:843 hit:843 align:843 bit:1658.7	OK	Elongation factor 2 (EF-2)	Protein LOW EXPRESSION OF OSMOTICALLY RESPONSIVE GENES 1	EF2_ARATH	Q9ASR1	C0Z355; Q56WX9; Q56WY3; Q570K2; Q84R07; Q8H145; Q94CA4; Q9SGT4	LOS1	na	Arabidopsis thaliana (Mouse-ear cress)	3702
High	Master Protein	GLYMA_03G119500	1.14.13.81 - Magnesium-protoporphyrin IX monomethyl ester (oxidative) cyclase / Mg-protoporphyrin IX monomethyl ester oxidative cyclase (1 of 2)	0	56.887	16	7	37	7	424	49	8.22	115.24	7	0	0.534	0.230657	12.9	130.4	69.6	32.93	18.09	High	High	High	High	High	High	1		3	3	Present Both	1	GLYMA_03G119500	GLYMA_03G119500	sp|Q9M591|CRD1_ARATH	Magnesium-protoporphyrin IX monomethyl ester [oxidative] cyclase, chloroplastic GN=CRD1	ident:344/424 pos:367/424 query:424 hit:409 align:405 bit:690.6	OK	Magnesium-protoporphyrin IX monomethyl ester [oxidative] cyclase, chloroplastic (Mg-protoporphyrin IX monomethyl ester oxidative cyclase)	Copper response defect 1 protein; Dicarboxylate diiron protein (AtZIP); MPE-cyclase	CRD1_ARATH	Q9M591	O04051; Q38892; Q8GUS3; Q9M1K4	CRD1	ACSF; AT103; CHL27; ZIP	Arabidopsis thaliana (Mouse-ear cress)	3702
High	Master Protein	GLYMA_15G185000	K02881 - large subunit ribosomal protein L18 (RP-L18, MRPL18, rplR) (1 of 5)	0	56.658	33	6	18	3	162	17.9	9.8	56.59	6	3	1.093	0.948995	58.39	100.7	99.3	57.56	53.47	High	High	Not Found	Peak Found	Peak Found	Peak Found	1		2	3	Present Both	1	GLYMA_15G185000	GLYMA_15G185000	sp|Q9SX68|RK18_ARATH	50S ribosomal protein L18, chloroplastic GN=RPL18	ident:97/162 pos:111/162 query:162 hit:170 align:127 bit:209.5	OK	50S ribosomal protein L18, chloroplastic	CL18	RK18_ARATH	Q9SX68	na	RPL18	na	Arabidopsis thaliana (Mouse-ear cress)	3702
High	Master Protein	GLYMA_09G129000	K03949 - NADH dehydrogenase (ubiquinone) 1 alpha subcomplex subunit 5 (NDUFA5) (1 of 1)	0	56.446	47	7	28	7	166	18.6	5.01	102.25	7	0	1.278	0.740874	35.89	83.8	116.2	3.97	19.74	High	High	High	High	High	High	1		3	3	Present Both	1	GLYMA_09G129000	GLYMA_09G129000	sp|Q9FLX7|NDUA5_ARATH	Probable NADH dehydrogenase [ubiquinone] 1 alpha subcomplex subunit 5, mitochondrial GN=NSL1	ident:130/166 pos:142/166 query:166 hit:169 align:164 bit:266.5	OK	Probable NADH dehydrogenase [ubiquinone] 1 alpha subcomplex subunit 5, mitochondrial	na	NDUA5_ARATH	Q9FLX7	na	OrderedLocusNames=At5g52840	na	Arabidopsis thaliana (Mouse-ear cress)	3702
High	Master Protein	GLYMA_09G248900	PTHR23151:SF66 - BIOTIN CARBOXYL CARRIER PROTEIN OF ACETYL-COA CARBOXYLASE 1, CHLOROPLASTIC (1 of 2)	0	56.438	39	7	15	7	261	27.5	9.33	64.64	7	0	0.94	0.981586	38.47	97.5	102.5	26.19	32.63	High	High	High	High	Peak Found	High	1		3	3	Present Both	1	GLYMA_09G248900	GLYMA_09G248900	sp|Q42533|BCCP1_ARATH	Biotin carboxyl carrier protein of acetyl-CoA carboxylase 1, chloroplastic GN=BCCP1	ident:134/261 pos:163/261 query:261 hit:280 align:246 bit:221.9	OK	Biotin carboxyl carrier protein of acetyl-CoA carboxylase 1, chloroplastic (AtBCCP1; BCCP-1)	na	BCCP1_ARATH	Q42533	O04845; Q9LL78	BCCP1	CAC1	Arabidopsis thaliana (Mouse-ear cress)	3702
High	Master Protein	GLYMA_19G028700	K02966 - small subunit ribosomal protein S19e (RP-S19e, RPS19) (1 of 4)	0	56.433	55	8	33	3	143	15.9	10.18	89.01	8	6	1.195	0.855893	28.55	91.2	108.8	1.96	30.88	High	High	High	High	Peak Found	High	1		3	3	Present Both	1	GLYMA_19G028700	GLYMA_19G028700	sp|Q9SGA6|RS191_ARATH	40S ribosomal protein S19-1 GN=RPS19A	ident:125/143 pos:134/143 query:143 hit:143 align:141 bit:267.7	OK	40S ribosomal protein S19-1	na	RS191_ARATH	Q9SGA6	na	RPS19A	na	Arabidopsis thaliana (Mouse-ear cress)	3702
High	Master Protein	GLYMA_11G098700	PTHR11071:SF264 - PEPTIDYL-PROLYL CIS-TRANS ISOMERASE CYP19-1 (1 of 3)	0	56.291	28	4	24	2	172	18.2	8.46	72.92	4	1	1.149	0.906801	62.74	77.2	122.8	53.29	45.06	High	High	High	High	High	High	1		3	3	Present Both	1	GLYMA_11G098700	GLYMA_11G098700	sp|Q38900|CP19A_ARATH	Peptidyl-prolyl cis-trans isomerase CYP19-1 GN=CYP19-1	ident:149/172 pos:161/172 query:172 hit:173 align:170 bit:320.9	OK	Peptidyl-prolyl cis-trans isomerase CYP19-1 (PPIase CYP19-1)	Cyclophilin of 19 kDa 1; Rotamase cyclophilin-3	CP19A_ARATH	Q38900	F4IL99	CYP19-1	ROC3	Arabidopsis thaliana (Mouse-ear cress)	3702
High	Master Protein	GLYMA_16G088200	K09569 - FK506-binding protein 2 [EC:5.2.1.8] (FKBP2) (1 of 2)	0	56.221	54	6	26	2	154	16.7	8.43	88.72	6	0	1.574	0.548523	128.55	80.2	119.8	121.18	113.23	High	Peak Found	High	High	Peak Found	High	1		3	3	Present Both	1	GLYMA_16G088200	GLYMA_16G088200	sp|Q38936|FK152_ARATH	Peptidyl-prolyl cis-trans isomerase FKBP15-2 GN=FKBP15-2	ident:115/154 pos:130/154 query:154 hit:163 align:164 bit:228.4	OK	Peptidyl-prolyl cis-trans isomerase FKBP15-2 (PPIase FKBP15-2)	15 kDa FK506-binding protein (15 kDa FKBP); FK506-binding protein 15-2 (AtFKBP15-2); FK506-binding protein 2-2; Immunophilin FKBP15-2; Rotamase	FK152_ARATH	Q38936	Q9FJL2	FKBP15-2	na	Arabidopsis thaliana (Mouse-ear cress)	3702
High	Master Protein	GLYMA_05G051800	KOG4083 - Head-elevated expression protein (1 of 1)	0	55.362	9	2	23	2	168	19.1	8.15	99.97	2	0	0.947	0.988209	49.41	110.5	89.5	20.99	18.5	High	High	High	High	High	High	1		3	3	Present Both	1	GLYMA_05G051800	GLYMA_05G051800	sp|P93004|PIP27_ARATH	Aquaporin PIP2-7 GN=PIP2-7	ident:16/168 pos:24/168 query:168 hit:280 align:44 bit:26.9	Partial_match_both	Aquaporin PIP2-7	Plasma membrane intrinsic protein 2-7 (AtPIP2;7); Plasma membrane intrinsic protein 3; Salt stress-induced major intrinsic protein	PIP27_ARATH	P93004	O22332; O49616	PIP2-7	PIP3; SIMIP	Arabidopsis thaliana (Mouse-ear cress)	3702
High	Master Protein	GLYMA_01G209500	PTHR31321:SF19 - PECTINESTERASE 68-RELATED (1 of 3)	0	54.665	15	4	22	3	363	40.3	8.81	63.29	4	1	0.606	0.442475	11.06	143.6	56.4	48.24	48.28	High	High	High	High	High	High	1		3	3	Present Both	1	GLYMA_01G209500	GLYMA_01G209500	sp|Q8LPF3|PME68_ARATH	Probable pectinesterase 68 GN=PME68	ident:259/363 pos:300/363 query:363 hit:362 align:364 bit:545.4	OK	Probable pectinesterase 68 (PE 68)	Pectin methylesterase 68 (AtPME68)	PME68_ARATH	Q8LPF3	Q9FGK7	PME68	ARATH68	Arabidopsis thaliana (Mouse-ear cress)	3702
High	Master Protein	GLYMA_12G159300	K00026 - malate dehydrogenase (MDH2) (1 of 7)	0	54.276	35	5	16	5	345	36.1	8.12	61.13	5	0	1.059	0.974214	24.85	72	128	109.4	115.34	High	High	High	High	High	High	1		3	3	Present Both	1	GLYMA_12G159300	GLYMA_12G159300	sp|Q9ZP06|MDHM1_ARATH	Malate dehydrogenase 1, mitochondrial GN=IDM2	ident:286/345 pos:313/345 query:345 hit:341 align:341 bit:590.1	OK	Malate dehydrogenase 1, mitochondrial	Mitochondrial MDH1 (mMDH1); Mitochondrial NAD-dependent malate dehydrogenase 1 (mNAD-MDH 1; mtNAD-MDH1)	MDHM1_ARATH	Q9ZP06	Q8LBB9; Q9MAH7	OrderedLocusNames=At1g53240	na	Arabidopsis thaliana (Mouse-ear cress)	3702
High	Master Protein	GLYMA_01G209400	K02983 - small subunit ribosomal protein S30e (RP-S30e, RPS30) (1 of 3)	0	54.253	12	4	54	4	104	11.6	12.07	161.46	4	0	1.359	0.657549	86.62	73	127	91.26	32.64	High	High	High	High	High	High	1		3	3	Present Both	1	GLYMA_01G209400	GLYMA_01G209400	sp|P49689|RS30_ARATH	40S ribosomal protein S30 GN=RPS30C	ident:59/104 pos:61/104 query:104 hit:62 align:61 bit:99.0	OK	40S ribosomal protein S30	na	RS30_ARATH	P49689	O82203; Q9M0E4	RPS30A	na	Arabidopsis thaliana (Mouse-ear cress)	3702
High	Master Protein	GLYMA_03G195700	K00419 - ubiquinol-cytochrome c reductase subunit 9 (QCR9, UCRC) (1 of 2)	0	54.023	83	6	24	6	71	8.1	9.6	75.94	6	0	1.426	0.596219	49.9	82.9	117.1	39.21	46.41	High	High	High	High	High	High	1		3	3	Present Both	1	GLYMA_03G195700	GLYMA_03G195700	sp|Q9SHE9|LBD4_ARATH	LOB domain-containing protein 4 GN=LBD4	ident:16/71 pos:34/71 query:71 hit:172 align:65 bit:28.1	Partial_match_hit	LOB domain-containing protein 4	ASYMMETRIC LEAVES 2-like protein 6 (AS2-like protein 6)	LBD4_ARATH	Q9SHE9	B7XG60; Q6DBF5	LBD4	ASL6	Arabidopsis thaliana (Mouse-ear cress)	3702
High	Master Protein	GLYMA_12G028300	1.3.1.72 - Delta(24)-sterol reductase / Lanosterol Delta(24)-reductase (1 of 2)	0	53.777	11	5	27	1	567	66	8.22	79.05	5	0	0.01	1.22204e-16		200		12.51		High	High	High	High	Not Found	High	1		3	2	Present Both	1	GLYMA_12G028300	GLYMA_12G028300	sp|Q39085|DIM_ARATH	Delta(24)-sterol reductase GN=DIM	ident:480/567 pos:511/567 query:567 hit:561 align:564 bit:999.2	OK	Delta(24)-sterol reductase	Cell elongation protein DIMINUTO; Cell elongation protein Dwarf1; Protein CABBAGE1; Protein ENHANCED VERY-LOW-FLUENCE RESPONSE 1	DIM_ARATH	Q39085	Q0WWL4; Q38808; Q8RXF4	DIM	CBB1; DWF1; EVE1	Arabidopsis thaliana (Mouse-ear cress)	3702
High	Master Protein	GLYMA_20G148300	PF00190 - Cupin (Cupin_1) (1 of 44)	0	53.417	17	9	15	4	605	70.3	5.17	38.4	9	2	7.703	3.16351e-11	74.7	2.5	197.5	128.05		Peak Found	Not Found	Not Found	Not Found	Not Found	High	1		1	1	Missing Both	1	GLYMA_20G148300	GLYMA_20G148300	sp|Q9LUJ7|PAP85_ARATH	Vicilin-like seed storage protein At3g22640 GN=PAP85	ident:127/605 pos:220/605 query:605 hit:486 align:408 bit:225.3	Poor_match	Vicilin-like seed storage protein At3g22640	Globulin At3g22640	PAP85_ARATH	Q9LUJ7	Q42160; Q42174; Q42222; Q42326; Q56WF0	PAP85	na	Arabidopsis thaliana (Mouse-ear cress)	3702
High	Master Protein	GLYMA_05G022900	K02694 - photosystem I subunit III (psaF) (1 of 1)	0	53.276	28	7	30	7	224	24.3	9.72	97.41	7	0	0.856	0.941298	40.22	98	102	41.17	47.51	High	High	High	High	High	High	1		3	3	Present Both	1	GLYMA_05G022900	GLYMA_05G022900	sp|Q9SHE8|PSAF_ARATH	Photosystem I reaction center subunit III, chloroplastic GN=PSAF	ident:165/224 pos:188/224 query:224 hit:221 align:227 bit:330.9	OK	Photosystem I reaction center subunit III, chloroplastic	Light-harvesting complex I 17 kDa protein; PSI-F	PSAF_ARATH	Q9SHE8	Q941C1; Q9SUI8	PSAF	na	Arabidopsis thaliana (Mouse-ear cress)	3702
High	Master Protein	GLYMA_04G012700	PF00076 - RNA recognition motif. (a.k.a. RRM, RBD, or RNP domain) (RRM_1) (1 of 477)	0	53.201	38	5	21	4	185	18	8.12	68.77	5	0	0.936	0.974214	37.84	77.1	122.9	60.72	45.7	High	High	High	High	High	High	1		3	3	Present Both	1	GLYMA_04G012700	GLYMA_04G012700	sp|Q03250|RBG7_ARATH	Glycine-rich RNA-binding protein 7 GN=RBG7	ident:67/185 pos:76/185 query:185 hit:176 align:85 bit:144.1	Partial_match_both	Glycine-rich RNA-binding protein 7 (AtGR-RBP7)	AtRBG7; Glycine-rich protein 7 (AtGRP7); Protein COLD, CIRCADIAN RHYTHM, AND RNA BINDING 2 (Protein CCR2)	RBG7_ARATH	Q03250	C0Z304; Q8LEV4; Q94B62	RBG7	CCR2; GR-RBP7; GRP7	Arabidopsis thaliana (Mouse-ear cress)	3702
High	Master Protein	GLYMA_11G176000	PF11493 - Thylakoid soluble phosphoprotein TSP9 (TSP9) (1 of 2)	0	53.102	48	7	19	2	92	9.5	9.85	72.48	7	5	0.879	0.957018	35.53	110.2	89.8	65.88	118.02	High	High	High	High	High	High	1		3	3	Present Both	1	GLYMA_11G176000	GLYMA_11G176000	sp|Q8RWL4|IDM2_ARATH	Increased DNA methylation 2 GN=IDM2	ident:16/92 pos:22/92 query:92 hit:349 align:42 bit:28.9	Partial_match_both	Increased DNA methylation 2	Alpha-crystallin domain-containing protein 39.4 (AtAcd39.4); Protein ROS5; Repressor of silencing 5	IDM2_ARATH	Q8RWL4	F4HYL2; Q9ZVL2	IDM2	na	Arabidopsis thaliana (Mouse-ear cress)	3702
High	Master Protein	GLYMA_11G146300	K02870 - large subunit ribosomal protein L12e (RP-L12e, RPL12) (1 of 4)	0	52.848	33	5	30	2	166	17.8	8.97	107.57	5	3	1.908	0.155039	46.42	69.9	130.1	28.56	21.71	Peak Found	High	High	High	High	High	1		3	3	Present Both	1	GLYMA_11G146300	GLYMA_11G146300	sp|P50883|RL121_ARATH	60S ribosomal protein L12-1 GN=RPL12A	ident:147/166 pos:159/166 query:166 hit:166 align:164 bit:303.9	OK	60S ribosomal protein L12-1	na	RL121_ARATH	P50883	Q9ZQD3	RPL12A	na	Arabidopsis thaliana (Mouse-ear cress)	3702
High	Master Protein	GLYMA_09G214500	K08762 - diazepam-binding inhibitor (GABA receptor modulator, acyl-CoA-binding protein) (DBI, ACBP) (1 of 2)	0	52.747	70	7	29	2	90	10.1	5.19	73.25	7	5	0.719	0.71596	27.38	118.9	81.1	45.66	60.45	High	High	High	High	Peak Found	High	1		3	3	Present Both	1	GLYMA_09G214500	GLYMA_09G214500	sp|P57752|ACBP6_ARATH	Acyl-CoA-binding domain-containing protein 6 GN=ACBP6	ident:64/90 pos:74/90 query:90 hit:92 align:90 bit:135.6	OK	Acyl-CoA-binding domain-containing protein 6 (Acyl-CoA binding protein 6)	Acyl-CoA-binding protein (ACBP)	ACBP6_ARATH	P57752	Q8L9P1	ACBP6	na	Arabidopsis thaliana (Mouse-ear cress)	3702
High	Master Protein	GLYMA_03G109500	K00940 - nucleoside-diphosphate kinase (ndk, NME) (1 of 8)	0	52.725	37	8	26	1	149	16.3	6.8	74.29	8	6	1.599	0.410838	46.12	94.9	105.1	71.18	22.47	High	Peak Found	High	Not Found	Peak Found	Peak Found	1		3	2	Present Both	1	GLYMA_03G109500	GLYMA_03G109500	sp|P39207|NDK1_ARATH	Nucleoside diphosphate kinase 1 GN=NDK1	ident:124/149 pos:134/149 query:149 hit:149 align:147 bit:261.2	OK	Nucleoside diphosphate kinase 1	Nucleoside diphosphate kinase I (NDK I; NDP kinase I; NDPK I)	NDK1_ARATH	P39207	F4JJZ8; Q41989; Q94JY5	NDK1	NDPK1	Arabidopsis thaliana (Mouse-ear cress)	3702
High	Master Protein	GLYMA_13G177900	K02988 - small subunit ribosomal protein S5 (RP-S5, MRPS5, rpsE) (1 of 4)	0	52.711	23	6	25	6	316	33.9	9.39	64.26	6	0	0.668	0.596219	18	128.9	71.1	56.44	38.69	High	High	Peak Found	High	High	High	1		3	3	Present Both	1	GLYMA_13G177900	GLYMA_13G177900	sp|P93014|RR5_ARATH	30S ribosomal protein S5, chloroplastic GN=rps5	ident:194/316 pos:228/316 query:316 hit:303 align:259 bit:405.2	OK	30S ribosomal protein S5, chloroplastic	na	RR5_ARATH	P93014	na	rps5	na	Arabidopsis thaliana (Mouse-ear cress)	3702
High	Master Protein	GLYMA_19G090000	PTHR21109:SF0 - 28S RIBOSOMAL PROTEIN S21, MITOCHONDRIAL (1 of 6)	0	52.619	39	6	26	2	167	19.4	9.82	93.92	6	4	1.257	0.763418	79.02	90.5	109.5	67.65	30.3	High	High	High	High	High	High	1		3	3	Present Both	1	GLYMA_19G090000	GLYMA_19G090000	No_match	nan	nan	No_match	na	na	na	na	na	na	na	na	na
High	Master Protein	GLYMA_09G234100	K03246 - translation initiation factor 3 subunit I (EIF3I) (1 of 3)	0	52.614	26	6	14	2	326	35.8	6.76	43.44	6	3	0.864	0.940694	20.43	111.7	88.3	6.47	27.86	High	High	Not Found	Not Found	Not Found	Not Found	1		2	0	Only Control	1	GLYMA_09G234100	GLYMA_09G234100	sp|Q38884|EIF3I_ARATH	Eukaryotic translation initiation factor 3 subunit I GN=TIF3I1	ident:267/326 pos:300/326 query:326 hit:328 align:328 bit:547.4	OK	Eukaryotic translation initiation factor 3 subunit I (eIF3i)	Eukaryotic translation initiation factor 3 subunit 2; TGF-beta receptor-interacting protein 1 (TRIP-1); eIF-3-beta; eIF3 p36	EIF3I_ARATH	Q38884	O82342; Q94K09; Q9C5Z0	TIF3I1	na	Arabidopsis thaliana (Mouse-ear cress)	3702
High	Master Protein	GLYMA_05G181700	PTHR15415:SF7 - MITOCHONDRIAL INNER MEMBRANE PROTEIN (1 of 1)	0	52.561	22	10	20	10	641	70.8	5.21	52.3	10	0	1.295	0.727639	46.29	116.5	83.5	42.89	33.41	High	High	High	High	High	High	1		3	3	Present Both	1	GLYMA_05G181700	GLYMA_05G181700	sp|Q9M9S2|PLY3_ARATH	Probable pectate lyase 3 GN=AT59	ident:19/641 pos:34/641 query:641 hit:459 align:65 bit:34.7	Partial_match_both	Probable pectate lyase 3	Pectate lyase A2	PLY3_ARATH	Q9M9S2	O23665	AT59	na	Arabidopsis thaliana (Mouse-ear cress)	3702
High	Master Protein	GLYMA_05G174300	K02942 - large subunit ribosomal protein LP1 (RP-LP1, RPLP1) (1 of 6)	0	51.701	22	3	9	3	125	12.3	4.41	50.48	3	0	1.226	0.897464	43	77.4	122.6	39.63	0.76	High	High	High	High	High	High	1		3	3	Present Both	1	GLYMA_05G174300	GLYMA_05G174300	sp|Q9SVZ6|RLA31_ARATH	60S acidic ribosomal protein P3-1 GN=RPP3A	ident:52/125 pos:59/125 query:125 hit:119 align:69 bit:108.2	Poor_match	60S acidic ribosomal protein P3-1	na	RLA31_ARATH	Q9SVZ6	na	RPP3A	na	Arabidopsis thaliana (Mouse-ear cress)	3702
High	Master Protein	GLYMA_07G115900	K00940 - nucleoside-diphosphate kinase (ndk, NME) (1 of 8)	0	51.626	37	8	28	1	149	16.5	6.8	73.19	8	0	1.454	0.802003	54.91	81.5	118.5	113.62	11.23	High	High	High	Not Found	Peak Found	Peak Found	1		3	2	Present Both	1	GLYMA_07G115900	GLYMA_07G115900	sp|P39207|NDK1_ARATH	Nucleoside diphosphate kinase 1 GN=NDK1	ident:128/149 pos:136/149 query:149 hit:149 align:147 bit:268.9	OK	Nucleoside diphosphate kinase 1	Nucleoside diphosphate kinase I (NDK I; NDP kinase I; NDPK I)	NDK1_ARATH	P39207	F4JJZ8; Q41989; Q94JY5	NDK1	NDPK1	Arabidopsis thaliana (Mouse-ear cress)	3702
High	Master Protein	GLYMA_01G034000	PTHR31907:SF1 - MLP-LIKE PROTEIN 423-RELATED (1 of 2)	0	51.222	61	8	22	1	153	17	5.12	57.1	8	5	1.153	0.900466	59.33	89.9	110.1	55.72	71.37	Not Found	Not Found	High	Peak Found	Peak Found	High	1		1	3	Only Sample	1	GLYMA_01G034000	GLYMA_01G034000	sp|Q93VR4|ML423_ARATH	MLP-like protein 423 GN=MLP423	ident:87/153 pos:114/153 query:153 hit:155 align:149 bit:186.4	OK	MLP-like protein 423	na	ML423_ARATH	Q93VR4	Q8L9L8; Q9LR93	MLP423	na	Arabidopsis thaliana (Mouse-ear cress)	3702
High	Master Protein	GLYMA_13G364200	PF01918 - Alba (Alba) (1 of 15)	0	50.926	35	4	20	4	133	14.7	5.17	79.4	4	0	0.943	0.981978	26.1	102.3	97.7	31.25	47.42	High	High	High	High	High	High	1	Acetyl [N-Term]	3	3	Present Both	1	GLYMA_13G364200	GLYMA_13G364200	sp|O22969|Y2416_ARATH	Uncharacterized protein At2g34160 GN=WRKY3	ident:103/133 pos:113/133 query:133 hit:130 align:131 bit:199.1	OK	Uncharacterized protein At2g34160	na	Y2416_ARATH	O22969	na	OrderedLocusNames=At2g34160	na	Arabidopsis thaliana (Mouse-ear cress)	3702
High	Master Protein	GLYMA_20G160500	K02920 - large subunit ribosomal protein L36e (RP-L36e, RPL36) (1 of 4)	0	50.807	32	6	28	1	110	12.4	11.31	71.12	6	0	2.262	0.465155	260.61	129.1	70.9	140.23	147.82	Peak Found	Not Found	High	High	Peak Found	High	1		2	3	Present Both	1	GLYMA_20G160500	GLYMA_20G160500	sp|Q9LZ57|RL363_ARATH	60S ribosomal protein L36-3 GN=RPL36C	ident:89/110 pos:98/110 query:110 hit:108 align:104 bit:176.4	OK	60S ribosomal protein L36-3	na	RL363_ARATH	Q9LZ57	na	RPL36C	na	Arabidopsis thaliana (Mouse-ear cress)	3702
High	Master Protein	GLYMA_11G103500	1.3.1.72 - Delta(24)-sterol reductase / Lanosterol Delta(24)-reductase (1 of 2)	0	50.772	11	5	24	1	567	66	8.21	66.72	5	3	0.625	0.492604	22.13	141.4	58.6	17.83	49.35	High	High	High	High	Not Found	Not Found	1		3	1	Only Control	1	GLYMA_11G103500	GLYMA_11G103500	sp|Q39085|DIM_ARATH	Delta(24)-sterol reductase GN=DIM	ident:475/567 pos:510/567 query:567 hit:561 align:564 bit:992.6	OK	Delta(24)-sterol reductase	Cell elongation protein DIMINUTO; Cell elongation protein Dwarf1; Protein CABBAGE1; Protein ENHANCED VERY-LOW-FLUENCE RESPONSE 1	DIM_ARATH	Q39085	Q0WWL4; Q38808; Q8RXF4	DIM	CBB1; DWF1; EVE1	Arabidopsis thaliana (Mouse-ear cress)	3702
High	Master Protein	GLYMA_09G271600	K03945 - NADH dehydrogenase (ubiquinone) 1 alpha subcomplex subunit 1 (NDUFA1) (1 of 2)	0	50.608	41	4	27	2	64	7.3	8.88	68.81	4	5	0.642	0.53432	26.65	135.6	64.4	24.85	76.07	Not Found	Not Found	High	High	Not Found	High	1		1	2	Only Sample	1	GLYMA_09G271600	GLYMA_09G271600	sp|Q9C9Z5|NDUA1_ARATH	NADH dehydrogenase [ubiquinone] 1 alpha subcomplex subunit 1 GN=NDT1	ident:49/64 pos:60/64 query:64 hit:65 align:65 bit:107.5	OK	NADH dehydrogenase [ubiquinone] 1 alpha subcomplex subunit 1	na	NDUA1_ARATH	Q9C9Z5	Q84MD9	OrderedLocusNames=At3g08610	na	Arabidopsis thaliana (Mouse-ear cress)	3702
High	Master Protein	GLYMA_06G309000	PTHR35753:SF1 - PROLINE-RICH FAMILY PROTEIN (1 of 2)	0	50.584	24	6	33	6	223	23.6	4.91	100.73	6	0	0.913	0.974214	51.81	91.9	108.1	41.53	18.57	High	High	High	High	High	High	1		3	3	Present Both	1	GLYMA_06G309000	GLYMA_06G309000	sp|Q9FL44|MPH1_ARATH	Protein MAINTENANCE OF PSII UNDER HIGH LIGHT 1 GN=MPH1	ident:136/223 pos:158/223 query:223 hit:235 align:200 bit:263.8	OK	Protein MAINTENANCE OF PSII UNDER HIGH LIGHT 1	na	MPH1_ARATH	Q9FL44	Q8LDY0	MPH1	na	Arabidopsis thaliana (Mouse-ear cress)	3702
High	Master Protein	GLYMA_02G198400	K03386 - peroxiredoxin (alkyl hydroperoxide reductase subunit C) [EC:1.11.1.15] (E1.11.1.15, PRDX, ahpC) (1 of 2)	0	50.559	21	5	10	5	260	28.5	6.4	41.34	5	0	0.888	0.958607	54.47	109.3	90.7	54.18	89.6	Peak Found	High	High	Peak Found	Peak Found	High	1		3	3	Present Both	1	GLYMA_02G198400	GLYMA_02G198400	sp|Q9C5R8|BAS1B_ARATH	2-Cys peroxiredoxin BAS1-like, chloroplastic GN=BAT1	ident:187/260 pos:201/260 query:260 hit:273 align:213 bit:399.8	OK	2-Cys peroxiredoxin BAS1-like, chloroplastic (2-Cys Prx B; 2-Cys peroxiredoxin B)	Thiol-specific antioxidant protein B	BAS1B_ARATH	Q9C5R8	Q9FED5; Q9FNH9	OrderedLocusNames=At5g06290	na	Arabidopsis thaliana (Mouse-ear cress)	3702
High	Master Protein	GLYMA_02G032300	PTHR31907:SF1 - MLP-LIKE PROTEIN 423-RELATED (1 of 2)	0	50.506	61	8	22	1	153	17.1	5.25	57	8	0	1.412	0.869577	43.05	82.9	117.1	7.88	41.51	Peak Found	High	Not Found	Peak Found	Peak Found	High	1		2	3	Present Both	1	GLYMA_02G032300	GLYMA_02G032300	sp|Q93VR4|ML423_ARATH	MLP-like protein 423 GN=MLP423	ident:86/153 pos:114/153 query:153 hit:155 align:149 bit:184.1	OK	MLP-like protein 423	na	ML423_ARATH	Q93VR4	Q8L9L8; Q9LR93	MLP423	na	Arabidopsis thaliana (Mouse-ear cress)	3702
High	Master Protein	GLYMA_18G076600	PTHR32382:SF4 - FASCICLIN-LIKE ARABINOGALACTAN PROTEIN 1 (1 of 6)	0	50.397	16	3	14	1	308	32.8	7.05	69.47	3	0	0.816	0.879928	21.98	107.3	92.7	25.96	29.1	High	High	High	High	Not Found	High	1		3	2	Present Both	1	GLYMA_18G076600	GLYMA_18G076600	sp|Q9FM65|FLA1_ARATH	Fasciclin-like arabinogalactan protein 1 GN=FLA1	ident:195/308 pos:231/308 query:308 hit:424 align:292 bit:384.4	OK	Fasciclin-like arabinogalactan protein 1	na	FLA1_ARATH	Q9FM65	Q8L8T1	FLA1	na	Arabidopsis thaliana (Mouse-ear cress)	3702
High	Master Protein	GLYMA_13G169500	PTHR11071:SF236 - PEPTIDYL-PROLYL CIS-TRANS ISOMERASE CYP38, CHLOROPLASTIC (1 of 2)	0	49.657	20	8	20	8	445	48.7	5.2	50.12	8	0	0.971	0.999087	104.77	147	53	63.12	106.73	High	High	High	High	High	High	1		3	3	Present Both	1	GLYMA_13G169500	GLYMA_13G169500	sp|Q9SSA5|CYP38_ARATH	Peptidyl-prolyl cis-trans isomerase CYP38, chloroplastic GN=CYP38	ident:322/445 pos:372/445 query:445 hit:437 align:428 bit:661.0	OK	Peptidyl-prolyl cis-trans isomerase CYP38, chloroplastic (PPIase CYP38)	Rotamase CYP38; Thylakoid lumen PPIase	CYP38_ARATH	Q9SSA5	B3H5B8; B9DHS6	CYP38	na	Arabidopsis thaliana (Mouse-ear cress)	3702
High	Master Protein	GLYMA_03G172200	K03254 - translation initiation factor 3 subunit A (EIF3A) (1 of 2)	0	49.641	9	6	10	6	958	111.9	9.29	41.16	6	0	1.789	0.519294	41.07	60.4	139.6	65.58	81.49	High	High	High	High	High	High	1		3	3	Present Both	1	GLYMA_03G172200	GLYMA_03G172200	sp|Q9LD55|EIF3A_ARATH	Eukaryotic translation initiation factor 3 subunit A GN=TIF3A1	ident:697/958 pos:815/958 query:958 hit:987 align:962 bit:1321.2	OK	Eukaryotic translation initiation factor 3 subunit A (eIF3a)	Eukaryotic translation initiation factor 3 large subunit; Eukaryotic translation initiation factor 3 subunit 10; eIF-3-theta; p114	EIF3A_ARATH	Q9LD55	na	TIF3A1	na	Arabidopsis thaliana (Mouse-ear cress)	3702
High	Master Protein	GLYMA_01G149700	PTHR10381//PTHR10381:SF24 - ATP-DEPENDENT CLP PROTEASE PROTEOLYTIC SUBUNIT // SUBFAMILY NOT NAMED (1 of 2)	0	49.41	30	6	25	6	306	33.1	6.96	68.96	6	0	1.048	0.972334	47.04	89.7	110.3	10.61	34.42	High	High	High	High	High	High	1		3	3	Present Both	1	GLYMA_01G149700	GLYMA_01G149700	sp|Q94B60|CLPP4_ARATH	ATP-dependent Clp protease proteolytic subunit 4, chloroplastic GN=CLPP4	ident:208/306 pos:229/306 query:306 hit:292 align:273 bit:405.6	OK	ATP-dependent Clp protease proteolytic subunit 4, chloroplastic	Endopeptidase ClpP4 (nClpP4); nClpP3	CLPP4_ARATH	Q94B60	Q8LAN0; Q9FHJ7; Q9SXJ5; Q9ZS78	CLPP4 NCLPP4	na	Arabidopsis thaliana (Mouse-ear cress)	3702
High	Master Protein	GLYMA_09G098900	K03098 - apolipoprotein D and lipocalin family protein (APOD) (1 of 4)	0	49.375	40	5	18	2	184	21.4	7.24	53.67	5	1	1.195	0.924565	83.02	98.3	101.7	40.55	66.47	High	High	High	High	Peak Found	High	1		3	3	Present Both	1	GLYMA_09G098900	GLYMA_09G098900	sp|Q9FGT8|TIL_ARATH	Temperature-induced lipocalin-1 GN=TIL	ident:131/184 pos:157/184 query:184 hit:186 align:182 bit:285.0	OK	Temperature-induced lipocalin-1 (AtTIL1)	na	TIL_ARATH	Q9FGT8	Q8LE12	TIL	na	Arabidopsis thaliana (Mouse-ear cress)	3702
High	Master Protein	GLYMA_04G249700	K03542 - photosystem II 22kDa protein (psbS) (1 of 3)	0	49.318	16	4	20	4	273	29	6.86	67.14	4	0	0.697	0.655258	18.19	131.1	68.9	6.93	66.21	High	High	High	High	High	High	1		3	3	Present Both	1	GLYMA_04G249700	GLYMA_04G249700	sp|Q9XF91|PSBS_ARATH	Photosystem II 22 kDa protein, chloroplastic GN=PSBS	ident:196/273 pos:214/273 query:273 hit:265 align:275 bit:310.1	OK	Photosystem II 22 kDa protein, chloroplastic	CP22; Protein NONPHOTOCHEMICAL QUENCHING 4; Protein PHOTOSYSTEM II SUBUNIT S	PSBS_ARATH	Q9XF91	Q56XH2; Q94EI1; Q9ST34	PSBS	na	Arabidopsis thaliana (Mouse-ear cress)	3702
High	Master Protein	GLYMA_06G236200	K02968 - small subunit ribosomal protein S20 (RP-S20, rpsT) (1 of 2)	0	48.758	31	7	20	2	179	19.8	10.46	53.52	7	4	1.369	0.655258	44.26	82.5	117.5	26.43	41.74	High	High	High	High	Peak Found	High	1		3	3	Present Both	1	GLYMA_06G236200	GLYMA_06G236200	sp|Q9ASV6|RR20_ARATH	30S ribosomal protein S20, chloroplastic GN=RPS20	ident:94/179 pos:107/179 query:179 hit:202 align:130 bit:178.7	OK	30S ribosomal protein S20, chloroplastic	na	RR20_ARATH	Q9ASV6	Q9LIL6	RPS20	na	Arabidopsis thaliana (Mouse-ear cress)	3702
High	Master Protein	GLYMA_17G239000	PTHR12411//PTHR12411:SF352 - CYSTEINE PROTEASE FAMILY C1-RELATED // SUBFAMILY NOT NAMED (1 of 3)	0	48.47	19	9	20	2	476	52.1	5.81	48.24	9	6	0.914	0.974214	30.45	112.9	87.1	6.54	22.61	High	High	High	High	Peak Found	Peak Found	1		3	3	Present Both	1	GLYMA_17G239000	GLYMA_17G239000	sp|P43297|RD21A_ARATH	Cysteine proteinase RD21A GN=RD21A	ident:321/476 pos:380/476 query:476 hit:462 align:460 bit:644.8	OK	Cysteine proteinase RD21A	Protein RESPONSIVE TO DEHYDRATION 21 (RD21)	RD21A_ARATH	P43297	na	RD21A	na	Arabidopsis thaliana (Mouse-ear cress)	3702
High	Master Protein	GLYMA_13G189500	PTHR11413:SF55 - CYSTEINE PROTEINASE INHIBITOR 6 (1 of 2)	0	48.225	30	5	20	3	245	27.7	7.08	80.74	5	1	0.907	0.96678	24.17	120.4	79.6	39.04	25.7	High	High	Peak Found	High	Peak Found	High	1		3	3	Present Both	1	GLYMA_13G189500	GLYMA_13G189500	sp|Q8H0X6|CYT6_ARATH	Cysteine proteinase inhibitor 6 GN=CYS6	ident:149/245 pos:180/245 query:245 hit:234 align:233 bit:304.7	OK	Cysteine proteinase inhibitor 6 (AtCYS-6)	PIP-M; PRLI-interacting factor M	CYT6_ARATH	Q8H0X6	Q8VZA2; Q9FUB0; Q9LHF9	CYS6	na	Arabidopsis thaliana (Mouse-ear cress)	3702
High	Master Protein	GLYMA_19G234100	PTHR23430//PTHR23430:SF103 - HISTONE H2A // SUBFAMILY NOT NAMED (1 of 1)	0	48.082	40	5	27	4	144	15.5	10.71	84.22	5	0	1.215	0.827538	37.76	88.1	111.9	30.34	32.1	High	High	High	High	High	High	1	Acetyl [N-Term]	3	3	Present Both	1	GLYMA_19G234100	GLYMA_19G234100	sp|Q94F49|H2A5_ARATH	Probable histone H2A.5 GN=F8H	ident:112/144 pos:125/144 query:144 hit:150 align:139 bit:222.6	OK	Probable histone H2A.5	HTA7	H2A5_ARATH	Q94F49	na	OrderedLocusNames=At5g27670	na	Arabidopsis thaliana (Mouse-ear cress)	3702
High	Master Protein	GLYMA_14G207600	PTHR11911 - INOSINE-5-MONOPHOSPHATE DEHYDROGENASE RELATED (1 of 11)	0	47.813	39	9	23	9	205	22.7	8.65	54.29	9	0	1.016	0.977807	34.89	82.5	117.5	42	20.59	High	High	High	High	High	High	1		3	3	Present Both	1	GLYMA_14G207600	GLYMA_14G207600	sp|Q9LEV3|CBSX3_ARATH	CBS domain-containing protein CBSX3, mitochondrial GN=CBSX3	ident:159/205 pos:183/205 query:205 hit:206 align:206 bit:332.4	OK	CBS domain-containing protein CBSX3, mitochondrial	na	CBSX3_ARATH	Q9LEV3	na	CBSX3	na	Arabidopsis thaliana (Mouse-ear cress)	3702
High	Master Protein	GLYMA_02G058200	KOG3377 - Uncharacterized conserved protein (1 of 7)	0	47.674	28	3	12	3	151	17.3	6.09	61.71	3	0	1.18	0.869416	117.37	119.8	80.2	26.03	91.04	High	High	High	High	High	High	1	Acetyl [N-Term]	3	3	Present Both	1	GLYMA_02G058200	GLYMA_02G058200	sp|Q948R1|PLA11_ARATH	Phospholipase A(1) DAD1, chloroplastic GN=DAD1	ident:30/151 pos:54/151 query:151 hit:447 align:130 bit:28.1	Partial_match_hit	Phospholipase A(1) DAD1, chloroplastic	Phospholipase A1-Ibeta1; Protein DEFECTIVE IN ANTHER DEHISCENCE 1 (AtDAD1)	PLA11_ARATH	Q948R1	F4IV22; O22170	DAD1	na	Arabidopsis thaliana (Mouse-ear cress)	3702
High	Master Protein	GLYMA_14G085800	PTHR12411//PTHR12411:SF352 - CYSTEINE PROTEASE FAMILY C1-RELATED // SUBFAMILY NOT NAMED (1 of 3)	0	47.668	16	8	16	1	496	54.4	6.02	45.5	8	0	100	1.22204e-16			200			Not Found	Not Found	Not Found	High	Not Found	High	1		0	2	Only Sample	1	GLYMA_14G085800	GLYMA_14G085800	sp|P43297|RD21A_ARATH	Cysteine proteinase RD21A GN=RD21A	ident:321/496 pos:382/496 query:496 hit:462 align:455 bit:650.6	OK	Cysteine proteinase RD21A	Protein RESPONSIVE TO DEHYDRATION 21 (RD21)	RD21A_ARATH	P43297	na	RD21A	na	Arabidopsis thaliana (Mouse-ear cress)	3702
High	Master Protein	GLYMA_01G081300	3.2.1.177 - Alpha-D-xyloside xylohydrolase / Alpha-xylosidase (1 of 3)	0	47.154	7	7	31	7	928	102.9	6.7	90.05	7	0	0.94	0.981586	33.36	103.3	96.7	9.68	19.96	High	High	High	High	High	High	1		3	3	Present Both	1	GLYMA_01G081300	GLYMA_01G081300	sp|Q9S7Y7|XYL1_ARATH	Alpha-xylosidase 1 GN=XYL1	ident:682/928 pos:782/928 query:928 hit:915 align:900 bit:1459.9	OK	Alpha-xylosidase 1	na	XYL1_ARATH	Q9S7Y7	P80846; Q9ZP26	XYL1	AXY3	Arabidopsis thaliana (Mouse-ear cress)	3702
High	Master Protein	GLYMA_12G182800	PTHR21141:SF48 - 60S ACIDIC RIBOSOMAL PROTEIN P2-4 (1 of 2)	0	46.905	82	4	12	4	111	11.2	4.37	48.38	4	0	2.292	0.388629	46.53	62.8	137.2	37.89	10.31	High	High	Not Found	High	Peak Found	High	1		2	3	Present Both	1	GLYMA_12G182800	GLYMA_12G182800	sp|Q9LXM8|RLA24_ARATH	60S acidic ribosomal protein P2-4 GN=RPP2D	ident:71/111 pos:83/111 query:111 hit:111 align:111 bit:101.3	OK	60S acidic ribosomal protein P2-4	na	RLA24_ARATH	Q9LXM8	na	RPP2D	na	Arabidopsis thaliana (Mouse-ear cress)	3702
High	Master Protein	GLYMA_12G063400	PTHR11937//PTHR11937:SF255 - ACTIN // SUBFAMILY NOT NAMED (1 of 9)	0	46.901	19	8	30	1	410	45.3	5.33	81.83	8	4	1.022	0.974214	57.23	97	103	23.03	10.69	High	High	High	High	High	High	1		3	3	Present Both	1	GLYMA_12G063400	GLYMA_12G063400	sp|P53496|ACT11_ARATH	Actin-11 GN=ACT11	ident:346/410 pos:358/410 query:410 hit:377 align:371 bit:722.2	OK	Actin-11	na	ACT11_ARATH	P53496	na	ACT11	na	Arabidopsis thaliana (Mouse-ear cress)	3702
High	Master Protein	GLYMA_08G364600	K19032 - 30S ribosomal protein 3 (PSRP3) (1 of 1)	0	46.84	44	3	12	3	158	17.7	9.28	56.92	3	0	1.392	0.740874	20.46	78.6	121.4	24.88	57.21	High	High	Peak Found	High	High	Peak Found	1		3	3	Present Both	1	GLYMA_08G364600	GLYMA_08G364600	sp|Q9SX22|RRP31_ARATH	30S ribosomal protein 3-1, chloroplastic GN=RPT3	ident:95/158 pos:110/158 query:158 hit:166 align:162 bit:173.3	OK	30S ribosomal protein 3-1, chloroplastic	Plastid-specific 30S ribosomal protein 3-1 (PSRP-3 1)	RRP31_ARATH	Q9SX22	Q8LD87	OrderedLocusNames=At1g68590	na	Arabidopsis thaliana (Mouse-ear cress)	3702
High	Master Protein	GLYMA_04G017500	K03781 - catalase (katE, CAT, catB, srpA) (1 of 4)	0	46.718	18	6	18	2	492	56.7	7.28	61.29	6	4	0.603	0.437721	14.66	130.5	69.5	37.63	19.16	High	High	Not Found	Peak Found	Peak Found	Not Found	1		2	2	Present Both	1	GLYMA_04G017500	GLYMA_04G017500	sp|P25819|CATA2_ARATH	Catalase-2 GN=CAT2	ident:426/492 pos:471/492 query:492 hit:492 align:492 bit:924.9	OK	Catalase-2	na	CATA2_ARATH	P25819	O49615	CAT2	CAT	Arabidopsis thaliana (Mouse-ear cress)	3702
High	Master Protein	GLYMA_06G089700	K19035 - 50S ribosomal protein 6 (PSRP6) (1 of 1)	0	46.486	47	3	18	3	98	10.4	10.27	85.62	3	0	1.361	0.657205	93.93	93.4	106.6	37.85	44.39	High	High	High	High	High	High	1		3	3	Present Both	1	GLYMA_06G089700	GLYMA_06G089700	sp|Q9FKP0|PSRP6_ARATH	50S ribosomal protein 6, chloroplastic GN=PSRP6	ident:45/98 pos:55/98 query:98 hit:106 align:81 bit:91.3	Poor_match	50S ribosomal protein 6, chloroplastic	CL25; Plastid-specific 50S ribosomal protein 6 (PSRP-6)	PSRP6_ARATH	Q9FKP0	na	PSRP6	na	Arabidopsis thaliana (Mouse-ear cress)	3702
High	Master Protein	GLYMA_17G192100	PTHR33605:SF3 - EARLY NODULIN-RELATED PROTEIN (1 of 1)	0	46.234	54	4	15	4	116	12.5	9.92	56.76	4	0	1.578	0.437221	52.71	77.4	122.6	40.98	13.49	High	High	High	High	High	High	1		3	3	Present Both	1	GLYMA_17G192100	GLYMA_17G192100	sp|O49552|DDB1B_ARATH	DNA damage-binding protein 1b GN=DDB1B	ident:11/116 pos:20/116 query:116 hit:1088 align:36 bit:27.3	Partial_match_both	DNA damage-binding protein 1b	UV-damaged DNA-binding protein 1b (DDB1b)	DDB1B_ARATH	O49552	Q0WML4; Q570Q9	DDB1B	na	Arabidopsis thaliana (Mouse-ear cress)	3702
High	Master Protein	GLYMA_02G137600	PTHR13077:SF6 - 15 KDA SELENOPROTEIN (1 of 2)	0	45.924	21	5	15	2	198	22.3	5.44	43.39	5	3	1.04	0.974214	31.39	100.9	99.1	26.38	41	Not Found	Not Found	High	Not Found	Not Found	High	1		1	1	Missing Both	1	GLYMA_02G137600	GLYMA_02G137600	sp|P56784|MATK_ARATH	Maturase K GN=matK	ident:24/198 pos:53/198 query:198 hit:504 align:128 bit:30.0	Partial_match_hit	Maturase K	Intron maturase	MATK_ARATH	P56784	Q9G1K9; Q9G227; Q9GF24; Q9GF25	matK	ycf14	Arabidopsis thaliana (Mouse-ear cress)	3702
High	Master Protein	GLYMA_17G254900	PTHR12411//PTHR12411:SF365 - CYSTEINE PROTEASE FAMILY C1-RELATED // SUBFAMILY NOT NAMED (1 of 3)	0	45.8	16	4	14	4	370	40.4	6.7	46.64	4	0	0.525	0.206318	9.55	136.3	63.7	14.58	8.12	High	High	High	High	Peak Found	High	1		3	3	Present Both	1	GLYMA_17G254900	GLYMA_17G254900	sp|P43296|RD19A_ARATH	Cysteine protease RD19A GN=RD19A	ident:251/370 pos:305/370 query:370 hit:368 align:371 bit:535.8	OK	Cysteine protease RD19A	Protein RESPONSIVE TO DEHYDRATION 19 (RD19)	RD19A_ARATH	P43296	Q0WWF3; Q8H7C0; Q8LAT5	RD19A	na	Arabidopsis thaliana (Mouse-ear cress)	3702
High	Master Protein	GLYMA_14G214800	PTHR11527:SF142 - 15.7 KDA HEAT SHOCK PROTEIN, PEROXISOMAL (1 of 2)	0	45.74	42	6	15	5	144	16.2	7.58	41.33	6	1	1.013	0.981978	46.11	102.8	97.2	17.47	92.27	High	High	Not Found	High	High	High	1		2	3	Present Both	1	GLYMA_14G214800	GLYMA_14G214800	sp|Q9FHQ3|HS157_ARATH	15.7 kDa heat shock protein, peroxisomal GN=HSP15.7	ident:92/144 pos:113/144 query:144 hit:137 align:148 bit:176.8	OK	15.7 kDa heat shock protein, peroxisomal (AtHsp15.7)	na	HS157_ARATH	Q9FHQ3	na	HSP15.7	na	Arabidopsis thaliana (Mouse-ear cress)	3702
High	Master Protein	GLYMA_09G134500	PF00168 - C2 domain (C2) (1 of 196)	0	45.701	16	5	26	5	281	30.3	5.03	87.59	5	0	0.566	0.318844	26.81	93.7	106.3	71.01	33.63	High	High	High	High	High	High	1		3	3	Present Both	1	GLYMA_09G134500	GLYMA_09G134500	sp|O04023|SRC2_ARATH	Protein SRC2 homolog GN=SRC2	ident:65/281 pos:99/281 query:281 hit:324 align:236 bit:46.2	Poor_match	Protein SRC2 homolog (AtSRC2)	na	SRC2_ARATH	O04023	O81814	SRC2	na	Arabidopsis thaliana (Mouse-ear cress)	3702
High	Master Protein	GLYMA_08G131500	K02942 - large subunit ribosomal protein LP1 (RP-LP1, RPLP1) (1 of 6)	0	45.684	22	2	19	2	120	11.9	4.46	76.76	2	0	2.013	0.153455	105.89	119.8	80.2	21.91	68.96	High	High	High	High	High	High	1		3	3	Present Both	1	GLYMA_08G131500	GLYMA_08G131500	sp|Q9LVC9|RLA32_ARATH	60S acidic ribosomal protein P3-2 GN=RPP3B	ident:51/120 pos:59/120 query:120 hit:120 align:69 bit:107.1	Poor_match	60S acidic ribosomal protein P3-2	na	RLA32_ARATH	Q9LVC9	na	RPP3B	na	Arabidopsis thaliana (Mouse-ear cress)	3702
High	Master Protein	GLYMA_18G291500	PTHR32227:SF54 - BETA-1, 3-GLUCANASE-LIKE PROTEIN-RELATED (1 of 1)	0	45.543	13	3	12	3	456	49.7	9.06	51.92	3	0	1.314	0.740874	109.34	96.1	103.9	13.67	92.66	High	High	High	High	High	Not Found	1		3	2	Present Both	1	GLYMA_18G291500	GLYMA_18G291500	sp|Q9M069|E137_ARATH	Glucan endo-1,3-beta-glucosidase 7 GN=DTX51	ident:188/456 pos:280/456 query:456 hit:504 align:453 bit:354.4	Poor_match	Glucan endo-1,3-beta-glucosidase 7	(1->3)-beta-glucan endohydrolase 7 ((1->3)-beta-glucanase 7); Beta-1,3-endoglucanase 7 (Beta-1,3-glucanase 7)	E137_ARATH	Q9M069	O65675; P80829	OrderedLocusNames=At4g34480	na	Arabidopsis thaliana (Mouse-ear cress)	3702
High	Master Protein	GLYMA_13G308300		0	45.435	49	3	10	3	91	10.4	6.54	49.48	3	0	1.712	0.317106	45	81.3	118.7	3.59	33.4	High	High	Peak Found	High	Peak Found	High	1		3	3	Present Both	1	GLYMA_13G308300	GLYMA_13G308300	sp|Q38821|2ABA_ARATH	Serine/threonine protein phosphatase 2A 55 kDa regulatory subunit B alpha isoform GN=PP2AB1	ident:11/91 pos:17/91 query:91 hit:513 align:43 bit:29.6	Partial_match_both	Serine/threonine protein phosphatase 2A 55 kDa regulatory subunit B alpha isoform (AtB alpha; PP2A, subunit B, alpha isoform)	na	2ABA_ARATH	Q38821	Q0WL96; Q27GN0; Q8L842; Q9C8H8	PP2AB1	na	Arabidopsis thaliana (Mouse-ear cress)	3702
High	Master Protein	GLYMA_03G193100	K02943 - large subunit ribosomal protein LP2 (RP-LP2, RPLP2) (1 of 6)	0	45.099	32	4	15	2	113	11.3	4.37	63.06	4	0	1.308	0.79641	54.49	82.5	117.5	12.26	9.51	Peak Found	Peak Found	Not Found	Peak Found	Peak Found	High	1		2	3	Present Both	1	GLYMA_03G193100	GLYMA_03G193100	sp|Q9LXM8|RLA24_ARATH	60S acidic ribosomal protein P2-4 GN=RPP2D	ident:79/113 pos:90/113 query:113 hit:111 align:113 bit:110.2	OK	60S acidic ribosomal protein P2-4	na	RLA24_ARATH	Q9LXM8	na	RPP2D	na	Arabidopsis thaliana (Mouse-ear cress)	3702
High	Master Protein	GLYMA_06G017900	K03781 - catalase (katE, CAT, catB, srpA) (1 of 4)	0	44.996	16	5	18	1	492	56.7	7.25	71.26	5	0	0.01	1.22204e-16		200		16		High	High	Not Found	High	Not Found	Not Found	1		2	1	Only Control	1	GLYMA_06G017900	GLYMA_06G017900	sp|P25819|CATA2_ARATH	Catalase-2 GN=CAT2	ident:428/492 pos:471/492 query:492 hit:492 align:492 bit:926.0	OK	Catalase-2	na	CATA2_ARATH	P25819	O49615	CAT2	CAT	Arabidopsis thaliana (Mouse-ear cress)	3702
High	Master Protein	GLYMA_15G016400	PTHR10744:SF7 - 30S RIBOSOMAL PROTEIN S17, CHLOROPLASTIC (1 of 2)	0	44.836	45	7	26	4	143	16.1	10.21	76.08	7	0	1.122	0.928237	13.07	104.8	95.2	6.11	4.61	High	High	Not Found	High	Peak Found	Not Found	1		2	2	Present Both	1	GLYMA_15G016400	GLYMA_15G016400	sp|P16180|RR17_ARATH	30S ribosomal protein S17, chloroplastic GN=RPS17	ident:87/143 pos:112/143 query:143 hit:149 align:145 bit:167.9	OK	30S ribosomal protein S17, chloroplastic	CS17	RR17_ARATH	P16180	na	RPS17	na	Arabidopsis thaliana (Mouse-ear cress)	3702
High	Master Protein	GLYMA_02G208900	K02267 - cytochrome c oxidase subunit 6b (COX6B) (1 of 5)	0	44.688	42	6	21	3	174	19.4	4.42	71.01	6	2	1.238	0.79197	50.19	68.3	131.7	38.26	55.01	High	High	Peak Found	High	High	High	1		3	3	Present Both	1	GLYMA_02G208900	GLYMA_02G208900	sp|Q9S7L9|CX6B1_ARATH	Cytochrome c oxidase subunit 6b-1 GN=COX6B-1	ident:113/174 pos:129/174 query:174 hit:191 align:182 bit:184.1	OK	Cytochrome c oxidase subunit 6b-1 (AtCOX6b-1)	na	CX6B1_ARATH	Q9S7L9	Q8LCP1	COX6B-1	na	Arabidopsis thaliana (Mouse-ear cress)	3702
High	Master Protein	GLYMA_19G080600	1.3.5.1//1.3.99.1 - Succinate dehydrogenase (quinone) / Succinic dehydrogenase (1 of 1)	0	44.606	28	9	30	9	277	31.1	8.62	61.8	9	0	1.285	0.740874	61.96	91.8	108.2	38.75	55.75	High	High	High	High	High	High	1		3	3	Present Both	1	GLYMA_19G080600	GLYMA_19G080600	sp|Q8LB02|SDHB2_ARATH	Succinate dehydrogenase [ubiquinone] iron-sulfur subunit 2, mitochondrial GN=SDH2-2	ident:220/277 pos:238/277 query:277 hit:280 align:277 bit:455.3	OK	Succinate dehydrogenase [ubiquinone] iron-sulfur subunit 2, mitochondrial	Iron-sulfur subunit of complex II (Ip)	SDHB2_ARATH	Q8LB02	Q9FM32; Q9G3L9	SDH2-2	na	Arabidopsis thaliana (Mouse-ear cress)	3702
High	Master Protein	GLYMA_07G034900	1.13.11.12//1.13.11.58 - Linoleate 13S-lipoxygenase / Lipoxidase // Linoleate 9S-lipoxygenase / Linoleate 9-lipoxygenase (1 of 3)	0	44.33	7	5	21	2	868	97.8	6.52	59.29	5	0	1.465	0.618804	84.37	90.1	109.9	4.21	53.99	High	High	Not Found	High	Peak Found	High	1		2	3	Present Both	1	GLYMA_07G034900	GLYMA_07G034900	sp|Q06327|LOX1_ARATH	Linoleate 9S-lipoxygenase 1 GN=LOX1	ident:488/868 pos:629/868 query:868 hit:859 align:870 bit:990.3	OK	Linoleate 9S-lipoxygenase 1	Lipoxygenase 1 (AtLOX1)	LOX1_ARATH	Q06327	Q9FZ30	LOX1	na	Arabidopsis thaliana (Mouse-ear cress)	3702
High	Master Protein	GLYMA_01G030600	K07466 - replication factor A1 (RFA1, RPA1, rpa) (1 of 23)	0	44.267	29	3	19	2	137	15.2	7.2	70.48	3	1	1.125	0.928237	40.36	93.3	106.7	11.61	21.48	Peak Found	Peak Found	High	High	Peak Found	High	1		3	3	Present Both	1	GLYMA_01G030600	GLYMA_01G030600	sp|O49453|Y4844_ARATH	Uncharacterized protein At4g28440 GN=CBSDUF1	ident:89/137 pos:106/137 query:137 hit:153 align:132 bit:186.0	OK	Uncharacterized protein At4g28440	na	Y4844_ARATH	O49453	na	OrderedLocusNames=At4g28440	na	Arabidopsis thaliana (Mouse-ear cress)	3702
High	Master Protein	GLYMA_03G163500.5.p	PTHR31189:SF1 - 12S SEED STORAGE PROTEIN CRA1-RELATED (1 of 6)	0	44.179	21	8	10	5	495	55.7	6.23	31.82	8	1	1.088	0.953681	96.35	94.9	105.1	84.96	51.98	Peak Found	Peak Found	High	Peak Found	Peak Found	High	1		3	3	Present Both	1	GLYMA_03G163500.5.p	GLYMA_03G163500.5.p	sp|P15455|CRU1_ARATH	12S seed storage protein CRA1 GN=CRA1	ident:194/495 pos:281/495 query:495 hit:472 align:486 bit:332.0	Poor_match	12S seed storage protein CRA1 beta chain	Cruciferin 1 (AtCRU1); Cruciferin A1; Legumin-type globulin storage protein CRA1; 12S seed storage protein CRA1 acidic chain; 12S seed storage protein CRA1 basic chain	CRU1_ARATH	P15455	Q3E711; Q56Z11; Q9FFH7	CRA1	CRU1; CRU4	Arabidopsis thaliana (Mouse-ear cress)	3702
High	Master Protein	GLYMA_12G082200		0	43.96	93	4	17	4	68	7.1	10.37	63.52	4	0	1.411	0.611312	65.16	79.2	120.8	48.97	30.97	High	High	High	High	High	High	1		3	3	Present Both	1	GLYMA_12G082200	GLYMA_12G082200	sp|Q9C7A2|ITN1_ARATH	Ankyrin repeat-containing protein ITN1 GN=ITN1	ident:12/68 pos:19/68 query:68 hit:590 align:33 bit:26.2	Partial_match_both	Ankyrin repeat-containing protein ITN1	Protein INCREASED TOLERANCE TO NACL	ITN1_ARATH	Q9C7A2	Q8LED2; Q9LHH2	ITN1	na	Arabidopsis thaliana (Mouse-ear cress)	3702
High	Master Protein	GLYMA_09G077600	K02881 - large subunit ribosomal protein L18 (RP-L18, MRPL18, rplR) (1 of 5)	0	43.886	28	4	14	1	160	17.8	9.74	41.86	4	0	1.21	0.912007	6.83	90.5	109.5	6.5		High	High	Not Found	Not Found	Peak Found	High	1		2	2	Present Both	1	GLYMA_09G077600	GLYMA_09G077600	sp|Q9SX68|RK18_ARATH	50S ribosomal protein L18, chloroplastic GN=RPL18	ident:99/160 pos:113/160 query:160 hit:170 align:127 bit:213.4	OK	50S ribosomal protein L18, chloroplastic	CL18	RK18_ARATH	Q9SX68	na	RPL18	na	Arabidopsis thaliana (Mouse-ear cress)	3702
High	Master Protein	GLYMA_13G207000	PTHR10430:SF7 - PEROXIREDOXIN-2F, MITOCHONDRIAL (1 of 4)	0	43.775	39	5	19	5	197	21.2	8.63	58.75	5	0	1.365	0.655258	40.18	72.3	127.7	15.22	18.96	High	High	High	High	High	High	1		3	3	Present Both	1	GLYMA_13G207000	GLYMA_13G207000	sp|Q9M7T0|PRX2F_ARATH	Peroxiredoxin-2F, mitochondrial GN=PRXIIF	ident:139/197 pos:156/197 query:197 hit:201 align:182 bit:292.0	OK	Peroxiredoxin-2F, mitochondrial	Peroxiredoxin IIF; Thioredoxin peroxidase 2F	PRX2F_ARATH	Q9M7T0	Q8LEJ1; Q8LPM1; Q941C2	PRXIIF	na	Arabidopsis thaliana (Mouse-ear cress)	3702
High	Master Protein	GLYMA_19G195100	K11099 - small nuclear ribonucleoprotein G (SNRPG, SMG) (1 of 3)	0	43.531	67	4	20	2	79	8.8	9.25	78.32	4	0	1.118	0.932008	78.22	109	91	56.31	22.58	High	High	High	High	High	High	1		3	3	Present Both	1	GLYMA_19G195100	GLYMA_19G195100	sp|O82221|RUXG_ARATH	Probable small nuclear ribonucleoprotein G GN=RXW24L	ident:73/79 pos:76/79 query:79 hit:80 align:79 bit:150.6	OK	Probable small nuclear ribonucleoprotein G (snRNP-G)	Sm protein G (Sm-G; SmG)	RUXG_ARATH	O82221	na	OrderedLocusNames=At2g23930	na	Arabidopsis thaliana (Mouse-ear cress)	3702
High	Master Protein	GLYMA_08G182200	PTHR11937//PTHR11937:SF247 - ACTIN // SUBFAMILY NOT NAMED (1 of 4)	0	43.509	21	8	22	1	377	41.6	5.49	65.45	8	0	0.502	0.161845	6.52	133.1	66.9	26.24	22.43	High	Peak Found	High	Peak Found	Peak Found	High	1		3	3	Present Both	1	GLYMA_08G182200	GLYMA_08G182200	sp|P53496|ACT11_ARATH	Actin-11 GN=ACT11	ident:355/377 pos:368/377 query:377 hit:377 align:377 bit:750.4	OK	Actin-11	na	ACT11_ARATH	P53496	na	ACT11	na	Arabidopsis thaliana (Mouse-ear cress)	3702
High	Master Protein	GLYMA_04G122700	K02873 - large subunit ribosomal protein L13e (RP-L13e, RPL13) (1 of 4)	0	43.508	41	7	22	1	207	23.9	10.93	50.89	7	6	1.061	0.963822	42.28	99.7	100.3	22.94	4	Not Found	High	Not Found	Not Found	Not Found	Not Found	1		1	0	Missing Both	1	GLYMA_04G122700	GLYMA_04G122700	sp|P41127|RL131_ARATH	60S ribosomal protein L13-1 GN=RPL13B	ident:167/207 pos:183/207 query:207 hit:206 align:191 bit:355.5	OK	60S ribosomal protein L13-1	Protein BBC1 homolog	RL131_ARATH	P41127	Q42280; Q8LFC4	RPL13B	BBC1	Arabidopsis thaliana (Mouse-ear cress)	3702
High	Master Protein	GLYMA_18G062900	PTHR11071//PTHR11071:SF291 - PEPTIDYL-PROLYL CIS-TRANS ISOMERASE // SUBFAMILY NOT NAMED (1 of 4)	0	43.47	42	5	14	3	204	21.9	9.17	35.04	5	2	1.386	0.712101	100.76	75.4	124.6	114.71	66.72	High	High	High	High	Peak Found	High	1		3	3	Present Both	1	GLYMA_18G062900	GLYMA_18G062900	sp|Q8LDP4|CP19D_ARATH	Peptidyl-prolyl cis-trans isomerase CYP19-4 GN=CYP19-4	ident:174/204 pos:187/204 query:204 hit:201 align:204 bit:358.2	OK	Peptidyl-prolyl cis-trans isomerase CYP19-4 (PPIase CYP19-4)	Cyclophilin of 19 kDa 4; Cyclophilin-5; Rotamase CYP19-4	CP19D_ARATH	Q8LDP4	A8MS66; O22515; O80876	CYP19-4	CYP5	Arabidopsis thaliana (Mouse-ear cress)	3702
High	Master Protein	GLYMA_14G206700	PF10890 - Protein of unknown function (DUF2741) (DUF2741) (1 of 2)	0	43.276	72	4	33	4	72	8.3	9.66	86.7	4	0	1.121	0.928237	58.53	72.8	127.2	41.31	20.27	High	High	High	High	High	High	1		3	3	Present Both	1	GLYMA_14G206700	GLYMA_14G206700	sp|Q1EBV7|BASS2_ARATH	Sodium/pyruvate cotransporter BASS2, chloroplastic GN=BASS2	ident:17/72 pos:29/72 query:72 hit:409 align:55 bit:29.3	Partial_match_hit	Sodium/pyruvate cotransporter BASS2, chloroplastic	Bile acid transporter 1; Bile acid-sodium symporter family protein 2	BASS2_ARATH	Q1EBV7	O81017; Q84WD8; Q8S2V7	BASS2	BAT1; SBF1	Arabidopsis thaliana (Mouse-ear cress)	3702
High	Master Protein	GLYMA_13G045800	K02993 - small subunit ribosomal protein S7e (RP-S7e, RPS7) (1 of 6)	0	43.204	25	6	24	5	191	22.3	9.76	85.55	6	0	0.799	0.858577	45.01	110.8	89.2	29.49	36.89	High	High	High	High	High	High	1		3	3	Present Both	1	GLYMA_13G045800	GLYMA_13G045800	sp|Q9M885|RS72_ARATH	40S ribosomal protein S7-2 GN=RPS7B	ident:158/191 pos:175/191 query:191 hit:191 align:191 bit:334.0	OK	40S ribosomal protein S7-2	na	RS72_ARATH	Q9M885	na	RPS7B	na	Arabidopsis thaliana (Mouse-ear cress)	3702
High	Master Protein	GLYMA_03G242900	K04565 - superoxide dismutase, Cu-Zn family (SOD1) (1 of 6)	0	43.18	18	3	17	3	152	15.2	6.04	67.9	3	0	0.835	0.919174	34.17	117.7	82.3	24.8	70.49	High	High	High	High	Peak Found	High	1		3	3	Present Both	1	GLYMA_03G242900	GLYMA_03G242900	sp|P24704|SODC1_ARATH	Superoxide dismutase [Cu-Zn] 1 GN=CSD1	ident:126/152 pos:136/152 query:152 hit:152 align:152 bit:254.2	OK	Superoxide dismutase [Cu-Zn] 1	Copper/zinc superoxide dismutase 1	SODC1_ARATH	P24704	A3FMJ0; Q9FRQ6	CSD1	SODCC	Arabidopsis thaliana (Mouse-ear cress)	3702
High	Master Protein	GLYMA_20G169900	K02964 - small subunit ribosomal protein S18e (RP-S18e, RPS18) (1 of 5)	0	43.045	49	9	30	1	152	17.5	10.56	61.5	9	8	1.242	0.784112	61.23	48.3	151.7	100.51	55.37	High	High	Not Found	Not Found	Not Found	Not Found	1		2	0	Only Control	1	GLYMA_20G169900	GLYMA_20G169900	sp|P34788|RS18_ARATH	40S ribosomal protein S18 GN=RPS18C	ident:143/152 pos:150/152 query:152 hit:152 align:152 bit:301.2	OK	40S ribosomal protein S18	na	RS18_ARATH	P34788	Q94K22	RPS18A	PFL	Arabidopsis thaliana (Mouse-ear cress)	3702
High	Master Protein	GLYMA_03G207500	K02889 - large subunit ribosomal protein L21e (RP-L21e, RPL21) (1 of 3)	0	43.026	21	1	10	1	164	18.6	10.51	69.87	1	0	1.145	0.921221	54.15	95.6	104.4	8.27	12.4	High	High	High	High	High	High	1		3	3	Present Both	1	GLYMA_03G207500	GLYMA_03G207500	sp|Q43291|RL211_ARATH	60S ribosomal protein L21-1 GN=RPL21C	ident:141/164 pos:152/164 query:164 hit:164 align:164 bit:297.7	OK	60S ribosomal protein L21-1	na	RL211_ARATH	Q43291	na	RPL21A	na	Arabidopsis thaliana (Mouse-ear cress)	3702
High	Master Protein	GLYMA_16G075400	K08488 - syntaxin 7 (STX7) (1 of 6)	0	42.634	34	10	28	4	273	30	6.32	66.86	10	6	0.93	0.974214	49.44	109.5	90.5	40.92	64.18	Peak Found	Peak Found	High	Peak Found	Peak Found	High	1		3	3	Present Both	1	GLYMA_16G075400	GLYMA_16G075400	sp|P93654|SYP22_ARATH	Syntaxin-22 GN=SYP22	ident:206/273 pos:232/273 query:273 hit:268 align:261 bit:417.9	OK	Syntaxin-22 (AtSYP22; AtVAM3)	Protein SHOOT GRAVITROPISM 3	SYP22_ARATH	P93654	na	SYP22	SGR3; VAM3	Arabidopsis thaliana (Mouse-ear cress)	3702
High	Master Protein	GLYMA_20G027200		0	42.364	34	4	17	3	125	12.5	5.27	42.96	4	0	0.798	0.858577	29.58	105.4	94.6	19.07	38.49	High	High	High	High	Peak Found	High	1		3	3	Present Both	1	GLYMA_20G027200	GLYMA_20G027200	sp|Q9ZQ80|NDRP1_ARATH	Nodulin-related protein 1 GN=NRP1	ident:58/125 pos:78/125 query:125 hit:187 align:134 bit:87.0	Poor_match	Nodulin-related protein 1 (AtNRP1)	RPS2-interacting protein 11	NDRP1_ARATH	Q9ZQ80	Q84VZ7	NRP1	na	Arabidopsis thaliana (Mouse-ear cress)	3702
High	Master Protein	GLYMA_03G196900	PTHR11564//PTHR11564:SF19 - GTPASE CONTAINING FAMILY OF SIGNAL RECOGNITION PARTICLE PROTEINS // SUBFAMILY NOT NAMED (1 of 2)	0	42.341	11	5	18	5	565	61.7	9.51	44.3	5	0	0.892	0.963822	49.92	122.8	77.2	28.48	36.93	High	High	High	High	High	High	1		3	3	Present Both	1	GLYMA_03G196900	GLYMA_03G196900	sp|P37107|SR54C_ARATH	Signal recognition particle 54 kDa protein, chloroplastic GN=FFC	ident:442/565 pos:497/565 query:565 hit:564 align:553 bit:895.6	OK	Signal recognition particle 54 kDa protein, chloroplastic (54 chloroplast protein; 54CP; SRP54; cpSRP54)	FFC	SR54C_ARATH	P37107	O82570	FFC	CPSRP54	Arabidopsis thaliana (Mouse-ear cress)	3702
High	Master Protein	GLYMA_16G211700	PTHR33107:SF1 - DR4 PROTEIN-RELATED (1 of 15)	0	42.245	31	4	15	4	214	23.6	5.38	61.28	4	0	1.215	0.852529	81.77	151.2	48.8	107.76	103.89	High	High	High	High	High	High	1		3	3	Present Both	1	GLYMA_16G211700	GLYMA_16G211700	sp|Q9LMU2|KTI2_ARATH	Kunitz trypsin inhibitor 2 GN=KTI2	ident:67/214 pos:94/214 query:214 hit:196 align:208 bit:72.8	Poor_match	Kunitz trypsin inhibitor 2 (AtKTI2)	na	KTI2_ARATH	Q9LMU2	na	KTI2	na	Arabidopsis thaliana (Mouse-ear cress)	3702
High	Master Protein	GLYMA_08G290700	K03248 - translation initiation factor 3 subunit G (EIF3G) (1 of 2)	0	42.159	32	7	27	7	290	32.1	8.21	65.24	7	0	0.974	0.999087	26.45	104.6	95.4	31.6	5.83	High	High	High	High	High	High	1		3	3	Present Both	1	GLYMA_08G290700	GLYMA_08G290700	sp|Q9SYG4|UBP1A_ARATH	Oligouridylate-binding protein 1A GN=UBP1A	ident:36/290 pos:50/290 query:290 hit:426 align:86 bit:65.1	Partial_match_both	Oligouridylate-binding protein 1A (AtUBP1a)	Polyuridylate-binding protein UBP1A (Poly(U)-binding protein UBP1A)	UBP1A_ARATH	Q9SYG4	na	UBP1A	na	Arabidopsis thaliana (Mouse-ear cress)	3702
High	Master Protein	GLYMA_04G202900	K08054 - calnexin (CANX) (1 of 3)	0	42.143	17	7	20	6	579	66.1	4.89	58.55	7	1	0.98	0.999087	54.1	115.4	84.6	33.35	18.34	High	High	High	High	High	High	1		3	3	Present Both	1	GLYMA_04G202900	GLYMA_04G202900	sp|P29402|CALX1_ARATH	Calnexin homolog 1 GN=CNX1	ident:404/579 pos:462/579 query:579 hit:530 align:569 bit:789.6	OK	Calnexin homolog 1	na	CALX1_ARATH	P29402	na	CNX1	na	Arabidopsis thaliana (Mouse-ear cress)	3702
High	Master Protein	GLYMA_14G219700	PTHR11528:SF45 - ENDOPLASMIN HOMOLOG (1 of 2)	0	42.11	8	5	15	1	847	97.3	5.02	41.22	5	3	1.019	0.99396	65.12	89.6	110.4	67.9	84.28	Peak Found	High	High	Peak Found	Peak Found	High	1		3	3	Present Both	1	GLYMA_14G219700	GLYMA_14G219700	sp|Q9STX5|ENPL_ARATH	Endoplasmin homolog GN=HSP90-7	ident:645/847 pos:711/847 query:847 hit:823 align:810 bit:1221.1	OK	Endoplasmin homolog	Glucose-regulated protein 94 homolog (GRP-94 homolog); Heat shock protein 90-7 (AtHSP90.7; AtHsp90-7); Protein SHEPHERD	ENPL_ARATH	Q9STX5	O22972; Q56Y38; Q8VY71	HSP90-7	na	Arabidopsis thaliana (Mouse-ear cress)	3702
High	Master Protein	GLYMA_17G258700	PTHR11528:SF45 - ENDOPLASMIN HOMOLOG (1 of 2)	0	42.11	9	5	16	1	814	93.2	4.98	42.45	5	0	0.807	0.897177	34.02	102.2	97.8	45.64	46.87	High	High	High	Peak Found	Peak Found	High	1		3	3	Present Both	1	GLYMA_17G258700	GLYMA_17G258700	sp|Q9STX5|ENPL_ARATH	Endoplasmin homolog GN=HSP90-7	ident:644/814 pos:711/814 query:814 hit:823 align:779 bit:1237.2	OK	Endoplasmin homolog	Glucose-regulated protein 94 homolog (GRP-94 homolog); Heat shock protein 90-7 (AtHSP90.7; AtHsp90-7); Protein SHEPHERD	ENPL_ARATH	Q9STX5	O22972; Q56Y38; Q8VY71	HSP90-7	na	Arabidopsis thaliana (Mouse-ear cress)	3702
High	Master Protein	GLYMA_03G063200	PTHR34550:SF1 - 30S RIBOSOMAL PROTEIN S31, CHLOROPLASTIC (1 of 2)	0	41.889	39	7	19	6	121	12.9	9.94	57.85	7	1	0.891	0.963822	81.37	74.1	125.9	68.28	50.21	High	High	Peak Found	High	High	High	1		3	3	Present Both	1	GLYMA_03G063200	GLYMA_03G063200	sp|O80439|RR31_ARATH	30S ribosomal protein S31, chloroplastic GN=RPS31	ident:69/121 pos:86/121 query:121 hit:118 align:120 bit:105.1	OK	30S ribosomal protein S31, chloroplastic	Plastid-specific 30S ribosomal protein 4 (PSRP-4)	RR31_ARATH	O80439	na	RPS31	PSRP4	Arabidopsis thaliana (Mouse-ear cress)	3702
High	Master Protein	GLYMA_10G222100		0	41.851	38	7	18	7	216	23.5	9.55	53.72	7	0	1.163	0.896688	46.42	107.2	92.8	39.35	51.96	High	High	High	High	High	High	1		3	3	Present Both	1	GLYMA_10G222100	GLYMA_10G222100	sp|Q9FEC1|OHP2_ARATH	Light-harvesting complex-like protein OHP2, chloroplastic GN=OHP2	ident:117/216 pos:131/216 query:216 hit:172 align:174 bit:188.0	OK	Light-harvesting complex-like protein OHP2, chloroplastic	One-helix protein 2	OHP2_ARATH	Q9FEC1	Q8LG09	OHP2	na	Arabidopsis thaliana (Mouse-ear cress)	3702
High	Master Protein	GLYMA_15G147300		0	41.587	38	6	27	6	198	22.3	5.73	71.54	6	0	0.912	0.974214	33.04	104.4	95.6	32.41	5.26	High	High	High	High	High	High	1		3	3	Present Both	1	GLYMA_15G147300	GLYMA_15G147300	sp|Q4PT37|NEAP3_ARATH	Nuclear envelope-associated protein 3 GN=NEAP3	ident:31/198 pos:48/198 query:198 hit:336 align:86 bit:35.4	Partial_match_both	Nuclear envelope-associated protein 3 (AtNEAP3)	na	NEAP3_ARATH	Q4PT37	O80530	NEAP3	na	Arabidopsis thaliana (Mouse-ear cress)	3702
High	Master Protein	GLYMA_19G101000	K02148 - V-type H+-transporting ATPase subunit C (ATPeV1C, ATP6C) (1 of 4)	0	41.575	24	6	18	3	377	42.8	6.09	53.82	6	3	0.95	0.983332	50.89	79.2	120.8	97.14	69.32	Peak Found	High	High	High	Peak Found	High	1		3	3	Present Both	1	GLYMA_19G101000	GLYMA_19G101000	sp|Q9SDS7|VATC_ARATH	V-type proton ATPase subunit C GN=VHA-C	ident:316/377 pos:347/377 query:377 hit:375 align:377 bit:659.4	OK	V-type proton ATPase subunit C (V-ATPase subunit C)	Vacuolar H(+)-ATPase subunit C; Vacuolar proton pump subunit C	VATC_ARATH	Q9SDS7	na	VHA-C	DET3; VATC	Arabidopsis thaliana (Mouse-ear cress)	3702
High	Master Protein	GLYMA_17G181000	PTHR21109:SF0 - 28S RIBOSOMAL PROTEIN S21, MITOCHONDRIAL (1 of 6)	0	41.341	36	5	19	1	169	19.6	9.88	64.98	5	0	2.35	0.249079	9.09	59.7	140.3	46.87		Peak Found	Peak Found	High	High	Not Found	High	1		3	2	Present Both	1	GLYMA_17G181000	GLYMA_17G181000	sp|Q9FHY0|PSD8B_ARATH	Putative 26S proteasome non-ATPase regulatory subunit 8 homolog B GN=RPN12B	ident:20/169 pos:29/169 query:169 hit:233 align:72 bit:33.1	Partial_match_both	Putative 26S proteasome non-ATPase regulatory subunit 8 homolog B	26S proteasome regulatory subunit RPN12b (AtRPN12b); 26S proteasome regulatory subunit S14 homolog B	PSD8B_ARATH	Q9FHY0	na	RPN12B	na	Arabidopsis thaliana (Mouse-ear cress)	3702
High	Master Protein	GLYMA_05G185800	K11088 - small nuclear ribonucleoprotein D3 (SNRPD3, SMD3) (1 of 2)	0	41.341	34	5	22	5	131	14.2	10.42	71.97	5	0	1.405	0.618804	77.39	102.3	97.7	51.88	49.87	High	High	High	High	High	High	1		3	3	Present Both	1	GLYMA_05G185800	GLYMA_05G185800	sp|Q9LM92|SMD3B_ARATH	Small nuclear ribonucleoprotein SmD3b GN=SMD3B	ident:112/131 pos:116/131 query:131 hit:131 align:132 bit:213.4	OK	Small nuclear ribonucleoprotein SmD3b (SmD3-b)	snRNP core protein D3-b	SMD3B_ARATH	Q9LM92	Q8LC48; Q9LMW6	SMD3B	na	Arabidopsis thaliana (Mouse-ear cress)	3702
High	Master Protein	GLYMA_20G188900		0	41.287	18	3	9	3	142	15.6	9.09	43.36	3	0	1.591	0.410838	58.78	76.4	123.6	49.24	37.5	High	High	Peak Found	High	High	High	1		3	3	Present Both	1	GLYMA_20G188900	GLYMA_20G188900	sp|O22834|LRK53_ARATH	Probable L-type lectin-domain containing receptor kinase V.3 GN=LECRK53	ident:10/142 pos:15/142 query:142 hit:664 align:23 bit:29.6	Partial_match_both	Probable L-type lectin-domain containing receptor kinase V.3 (Arabidopsis thaliana lectin-receptor kinase c2; AthlecRK-c2; LecRK-V.3)	na	LRK53_ARATH	O22834	na	LECRK53	LECRKC2	Arabidopsis thaliana (Mouse-ear cress)	3702
High	Master Protein	GLYMA_10G245200	K02984 - small subunit ribosomal protein S3Ae (RP-S3Ae, RPS3A) (1 of 5)	0	40.892	23	6	26	2	261	29.7	9.8	70.73	6	2	0.846	0.928237	39.9	99.8	100.2	7.57	38.01	High	High	High	High	High	High	1		3	3	Present Both	1	GLYMA_10G245200	GLYMA_10G245200	sp|Q9CAV0|RS3A1_ARATH	40S ribosomal protein S3a-1 GN=RPS3AA	ident:224/261 pos:246/261 query:261 hit:262 align:262 bit:455.7	OK	40S ribosomal protein S3a-1	na	RS3A1_ARATH	Q9CAV0	na	RPS3AA	na	Arabidopsis thaliana (Mouse-ear cress)	3702
High	Master Protein	GLYMA_17G096100	PTHR24093:SF264 - ATPASE 4, PLASMA MEMBRANE-TYPE (1 of 6)	0	40.782	12	8	9	8	955	105	6.73	26.84	8	0	0.823	0.896358	104.59	175	25	34.62	68.71	High	High	High	High	Peak Found	High	1		3	3	Present Both	1	GLYMA_17G096100	GLYMA_17G096100	sp|Q9LV11|PMA11_ARATH	ATPase 11, plasma membrane-type GN=AHA11	ident:881/955 pos:923/955 query:955 hit:956 align:956 bit:1773.8	OK	ATPase 11, plasma membrane-type	Proton pump 11	PMA11_ARATH	Q9LV11	na	AHA11	na	Arabidopsis thaliana (Mouse-ear cress)	3702
High	Master Protein	GLYMA_10G236300	PF03766 - Remorin, N-terminal region (Remorin_N) (1 of 8)	0	40.625	46	8	16	4	194	21.5	5.83	40.14	8	0	0.722	0.695367	10.2	127.6	72.4	18.44	34.71	High	High	Peak Found	High	Peak Found	High	1		3	3	Present Both	1	GLYMA_10G236300	GLYMA_10G236300	sp|Q9FFA5|RMR14_ARATH	Remorin 1.4 GN=REM1.4	ident:128/194 pos:148/194 query:194 hit:202 align:208 bit:204.9	OK	Remorin 1.4 (AtREM1.4)	Remorin group 1 member 4	RMR14_ARATH	Q9FFA5	F4KEA0; Q8LC13	REM1.4	na	Arabidopsis thaliana (Mouse-ear cress)	3702
High	Master Protein	GLYMA_11G228800	PTHR21649:SF32 - CHLOROPHYLL A-B BINDING PROTEIN CP29.3, CHLOROPLASTIC (1 of 2)	0	40.453	20	3	10	3	282	31.1	6.81	40.58	3	0	0.543	0.239674	5.73	143.9	56.1	18.77		High	High	Not Found	High	Not Found	Not Found	1		2	1	Only Control	1	GLYMA_11G228800	GLYMA_11G228800	sp|Q9S7W1|CB4C_ARATH	Chlorophyll a-b binding protein CP29.3, chloroplastic GN=LHCB4.3	ident:188/282 pos:208/282 query:282 hit:276 align:229 bit:397.1	OK	Chlorophyll a-b binding protein CP29.3, chloroplastic	LHCB4.3; LHCII protein 4.3	CB4C_ARATH	Q9S7W1	Q8L9J2	LHCB4.3	na	Arabidopsis thaliana (Mouse-ear cress)	3702
High	Master Protein	GLYMA_05G014300	PTHR11071:SF244 - CYCLOPHILIN-LIKE PEPTIDYL-PROLYL CIS-TRANS ISOMERASE FAMILY PROTEIN (1 of 2)	0	40.278	20	6	21	2	387	42	5.06	55.26	6	4	1.003	0.989484	69.37	101.4	98.6	11.06	25.97	Peak Found	Peak Found	High	Not Found	Peak Found	High	1		3	2	Present Both	1	GLYMA_05G014300	GLYMA_05G014300	sp|F4HTT6|CP26B_ARATH	Peptidyl-prolyl cis-trans isomerase CYP26-2, chloroplastic GN=CYP26-2	ident:156/387 pos:185/387 query:387 hit:317 align:232 bit:317.8	Poor_match	Peptidyl-prolyl cis-trans isomerase CYP26-2, chloroplastic (PPIase CYP26-2)	Cyclophilin of 26 kDa 2; Cyclophilin-26-2	CP26B_ARATH	F4HTT6	Q8W4C6; Q9C9C7	CYP26-2	na	Arabidopsis thaliana (Mouse-ear cress)	3702
High	Master Protein	GLYMA_04G223400		0	40.169	87	5	27	3	52	5.8	9.7	82.39	5	0	0.969	0.999087	22.08	109.5	90.5	26.98	14.57	High	High	High	High	High	High	1		3	3	Present Both	1	GLYMA_04G223400	GLYMA_04G223400	sp|P54144|AMT11_ARATH	Ammonium transporter 1 member 1 GN=AMT1-1	ident:11/52 pos:14/52 query:52 hit:501 align:25 bit:25.8	Partial_match_both	Ammonium transporter 1 member 1 (AtAMT1;1)	na	AMT11_ARATH	P54144	Q94C23	AMT1-1	na	Arabidopsis thaliana (Mouse-ear cress)	3702
High	Master Protein	GLYMA_13G112500	PTHR10772:SF0 - 20 KDA CHAPERONIN, CHLOROPLASTIC (1 of 4)	0	39.971	37	6	14	6	251	26.5	8.63	41.53	6	0	1.167	0.893905	77.52	98.4	101.6	97.98	75.82	Peak Found	High	High	High	High	High	1		3	3	Present Both	1	GLYMA_13G112500	GLYMA_13G112500	sp|O65282|CH20_ARATH	20 kDa chaperonin, chloroplastic GN=CPN20	ident:181/251 pos:216/251 query:251 hit:253 align:251 bit:362.8	OK	20 kDa chaperonin, chloroplastic	Chaperonin 10 (Ch-CPN10; Cpn10); Chaperonin 20; Protein Cpn21	CH20_ARATH	O65282	Q9TNN2	CPN20	CHCPN10; CPN21	Arabidopsis thaliana (Mouse-ear cress)	3702
High	Master Protein	GLYMA_19G077100	K17435 - large subunit ribosomal protein L54 (MRPL54) (1 of 2)	0	39.95	35	4	23	4	131	14.6	10.04	63.25	4	0	1.34	0.700252	22.2	91.6	108.4	10.07	54.53	High	High	High	High	High	High	1		3	3	Present Both	1	GLYMA_19G077100	GLYMA_19G077100	sp|Q9LS44|PCR4_ARATH	Protein PLANT CADMIUM RESISTANCE 4 GN=PCR4	ident:13/131 pos:17/131 query:131 hit:184 align:32 bit:29.3	Partial_match_both	Protein PLANT CADMIUM RESISTANCE 4 (AtPCR4)	na	PCR4_ARATH	Q9LS44	na	PCR4	na	Arabidopsis thaliana (Mouse-ear cress)	3702
High	Master Protein	GLYMA_05G016000	PF00581 - Rhodanese-like domain (Rhodanese) (1 of 30)	0	39.914	27	6	10	2	396	41.7	9.26	34.55	6	0	0.01	1.22204e-16		200		0.71		High	High	Not Found	Not Found	Not Found	Not Found	1		2	0	Only Control	1	GLYMA_05G016000	GLYMA_05G016000	sp|Q9FN48|CAS_ARATH	Calcium sensing receptor, chloroplastic GN=CAS	ident:268/396 pos:324/396 query:396 hit:387 align:393 bit:534.6	OK	Calcium sensing receptor, chloroplastic	Sulfurtransferase 3 (AtStr3)	CAS_ARATH	Q9FN48	na	CAS	STR3	Arabidopsis thaliana (Mouse-ear cress)	3702
High	Master Protein	GLYMA_02G047800	K02987 - small subunit ribosomal protein S4e (RP-S4e, RPS4) (1 of 6)	0	39.698	27	7	29	7	264	29.9	10.21	77.92	7	0	1.097	0.947586	51.25	98.1	101.9	46.26	35.85	High	High	High	High	High	High	1		3	3	Present Both	1	GLYMA_02G047800	GLYMA_02G047800	sp|P49204|RS42_ARATH	40S ribosomal protein S4-2 GN=RPS4B	ident:241/264 pos:258/264 query:264 hit:262 align:262 bit:514.2	OK	40S ribosomal protein S4-2	na	RS42_ARATH	P49204	Q42346; Q9FL39; Q9LYQ6	RPS4B	na	Arabidopsis thaliana (Mouse-ear cress)	3702
High	Master Protein	GLYMA_13G363900	K14309 - nuclear pore complex protein Nup93 (NUP93, NIC96) (1 of 2)	0	39.642	11	6	24	6	861	95.8	6.81	63.84	6	0	0.888	0.963822	35.69	113.5	86.5	33.11	32.42	High	High	High	High	High	High	1		3	3	Present Both	1	GLYMA_13G363900	GLYMA_13G363900	sp|O22224|NP93A_ARATH	Nuclear pore complex protein NUP93A GN=NUP93A	ident:649/861 pos:747/861 query:861 hit:861 align:861 bit:1347.4	OK	Nuclear pore complex protein NUP93A	Nucleoporin 93A	NP93A_ARATH	O22224	Q94CF2	NUP93A	na	Arabidopsis thaliana (Mouse-ear cress)	3702
High	Master Protein	GLYMA_04G015300	PTHR21049:SF1 - DOLICHYL-DIPHOSPHOOLIGOSACCHARIDE--PROTEIN GLYCOSYLTRANSFERASE SUBUNIT 1A (1 of 2)	0	39.526	7	8	33	2	619	69	8.34	90.04	8	8	0.8	0.858577	30.69	97.4	102.6	33.07	24.52	High	High	Peak Found	Peak Found	High	High	1		3	3	Present Both	1	GLYMA_04G015300	GLYMA_04G015300	sp|Q9SFX3|OST1A_ARATH	Dolichyl-diphosphooligosaccharide--protein glycosyltransferase subunit 1A GN=OST1A	ident:408/619 pos:491/619 query:619 hit:614 align:591 bit:847.0	OK	Dolichyl-diphosphooligosaccharide--protein glycosyltransferase subunit 1A	Ribophorin IA (RPN-IA); Ribophorin-1A	OST1A_ARATH	Q9SFX3	Q8H795	OST1A	RPN1A	Arabidopsis thaliana (Mouse-ear cress)	3702
High	Master Protein	GLYMA_01G174000	PTHR23075:SF3 - AAA-TYPE ATPASE FAMILY PROTEIN-RELATED (1 of 2)	0	39.07	9	7	11	6	626	70.3	8.1	34.84	7	1	1.225	0.813759	39.12	78	122	81.37	44.92	High	High	Peak Found	High	Peak Found	Peak Found	1		3	3	Present Both	1	GLYMA_01G174000	GLYMA_01G174000	sp|Q9LZF6|CD48E_ARATH	Cell division control protein 48 homolog E GN=CDC48E	ident:73/626 pos:119/626 query:626 hit:810 align:238 bit:83.2	Partial_match_both	Cell division control protein 48 homolog E (AtCDC48e)	Transitional endoplasmic reticulum ATPase E	CD48E_ARATH	Q9LZF6	na	CDC48E	na	Arabidopsis thaliana (Mouse-ear cress)	3702
High	Master Protein	GLYMA_16G146600	K02148 - V-type H+-transporting ATPase subunit C (ATPeV1C, ATP6C) (1 of 4)	0	39.016	26	6	16	4	375	42.5	5.41	48.43	6	0	1.155	0.963822	68.14	76.5	123.5	57.37	80.05	High	High	High	High	Not Found	High	1		3	2	Present Both	1	GLYMA_16G146600	GLYMA_16G146600	sp|Q9SDS7|VATC_ARATH	V-type proton ATPase subunit C GN=VHA-C	ident:305/375 pos:346/375 query:375 hit:375 align:374 bit:656.0	OK	V-type proton ATPase subunit C (V-ATPase subunit C)	Vacuolar H(+)-ATPase subunit C; Vacuolar proton pump subunit C	VATC_ARATH	Q9SDS7	na	VHA-C	DET3; VATC	Arabidopsis thaliana (Mouse-ear cress)	3702
High	Master Protein	GLYMA_10G019600	PTHR19424 - HEAT SHOCK FACTOR BINDING PROTEIN 1 (1 of 3)	0	39.015	29	3	8	3	108	12	4.46	36.83	3	0	1.014	0.999087	54.65	110.9	89.1	18.97	34	High	High	Peak Found	High	Peak Found	High	1		3	3	Present Both	1	GLYMA_10G019600	GLYMA_10G019600	sp|Q8GW48|HSBP_ARATH	Heat shock factor-binding protein GN=HSBP	ident:61/108 pos:66/108 query:108 hit:86 align:93 bit:117.1	OK	Heat shock factor-binding protein (AtHSBP)	na	HSBP_ARATH	Q8GW48	O23431	HSBP	na	Arabidopsis thaliana (Mouse-ear cress)	3702
High	Master Protein	GLYMA_02G017800	K02891 - large subunit ribosomal protein L22e (RP-L22e, RPL22) (1 of 8)	0	39.015	33	5	17	5	119	13.5	9.45	43.43	5	0	1.295	0.727639	48.05	77.8	122.2	19.1	19.83	High	High	High	High	High	High	1		3	3	Present Both	1	GLYMA_02G017800	GLYMA_02G017800	sp|Q9M9W1|RL222_ARATH	60S ribosomal protein L22-2 GN=RPL22B	ident:102/119 pos:112/119 query:119 hit:124 align:116 bit:188.7	OK	60S ribosomal protein L22-2	na	RL222_ARATH	Q9M9W1	na	RPL22B	na	Arabidopsis thaliana (Mouse-ear cress)	3702
High	Master Protein	GLYMA_04G061900	PTHR10050 - DOLICHYL-PHOSPHATE-MANNOSE--PROTEIN MANNOSYLTRANSFERASE (1 of 2)	0	38.867	25	4	13	4	222	24.3	7.33	49.29	4	0	1.597	0.441917	84.03	86.8	113.2	7.9	17.39	High	High	High	High	Peak Found	High	1		3	3	Present Both	1	GLYMA_04G061900	GLYMA_04G061900	sp|Q93ZE8|SDF2_ARATH	Stromal cell-derived factor 2-like protein GN=SDF2	ident:177/222 pos:196/222 query:222 hit:218 align:221 bit:374.4	OK	Stromal cell-derived factor 2-like protein (AtSDF2; SDF2-like protein)	na	SDF2_ARATH	Q93ZE8	O81720; Q9SEZ5	SDF2	na	Arabidopsis thaliana (Mouse-ear cress)	3702
High	Master Protein	GLYMA_20G146200	PF00190//PF07883 - Cupin (Cupin_1) // Cupin domain (Cupin_2) (1 of 2)	0	38.865	18	8	10	6	439	50.4	6.24	24.35	8	0	100	1.22204e-16			200		122.62	Not Found	Not Found	Not Found	Peak Found	Not Found	High	1		0	2	Only Sample	1	GLYMA_20G146200	GLYMA_20G146200	sp|Q9LUJ7|PAP85_ARATH	Vicilin-like seed storage protein At3g22640 GN=PAP85	ident:138/439 pos:236/439 query:439 hit:486 align:428 bit:234.2	Poor_match	Vicilin-like seed storage protein At3g22640	Globulin At3g22640	PAP85_ARATH	Q9LUJ7	Q42160; Q42174; Q42222; Q42326; Q56WF0	PAP85	na	Arabidopsis thaliana (Mouse-ear cress)	3702
High	Master Protein	GLYMA_10G106400	PF13202//PF13405 - EF hand (EF-hand_5) // EF-hand domain (EF-hand_6) (1 of 3)	0	38.729	18	4	6	4	284	30.6	6.68	19.91	4	0	100	1.22204e-16			200			Not Found	Not Found	Not Found	Not Found	Not Found	High	1		0	1	Missing Both	1	GLYMA_10G106400	GLYMA_10G106400	sp|Q8W4L0|CML49_ARATH	Probable calcium-binding protein CML49 GN=CML49	ident:200/284 pos:228/284 query:284 hit:335 align:316 bit:360.9	OK	Probable calcium-binding protein CML49	Calmodulin-like protein 49	CML49_ARATH	Q8W4L0	Q2V3X2; Q3E6V8; Q9SS41	CML49	na	Arabidopsis thaliana (Mouse-ear cress)	3702
High	Master Protein	GLYMA_04G195100	K03232 - elongation factor 1-beta (EEF1B) (1 of 5)	0	38.681	32	7	18	5	230	25	4.56	49.29	7	1	0.963	0.999087	29.04	99.6	100.4	31.44	45.06	High	High	High	High	High	Peak Found	1		3	3	Present Both	1	GLYMA_04G195100	GLYMA_04G195100	sp|Q9SI20|EF1D2_ARATH	Elongation factor 1-delta 2 GN=EDL1	ident:183/230 pos:203/230 query:230 hit:231 align:226 bit:325.1	OK	Elongation factor 1-delta 2 (EF-1-delta 2)	Elongation factor 1B-beta 2; eEF-1B beta 2	EF1D2_ARATH	Q9SI20	Q7GA96; Q8LB45	OrderedLocusNames=At2g18110	na	Arabidopsis thaliana (Mouse-ear cress)	3702
High	Master Protein	GLYMA_10G224200	K02964 - small subunit ribosomal protein S18e (RP-S18e, RPS18) (1 of 5)	0	38.66	39	8	26	2	181	21	10.58	47.29	8	0	1.148	0.943898	47.62	93.1	106.9	32.51	50.38	High	High	High	High	High	High	1		3	3	Present Both	1	GLYMA_10G224200	GLYMA_10G224200	sp|P34788|RS18_ARATH	40S ribosomal protein S18 GN=RPS18C	ident:141/181 pos:150/181 query:181 hit:152 align:181 bit:282.7	OK	40S ribosomal protein S18	na	RS18_ARATH	P34788	Q94K22	RPS18A	PFL	Arabidopsis thaliana (Mouse-ear cress)	3702
High	Master Protein	GLYMA_02G244300	PTHR11527:SF142 - 15.7 KDA HEAT SHOCK PROTEIN, PEROXISOMAL (1 of 2)	0	38.643	32	3	7	2	144	16.2	7.64	28.21	3	0	1.831	0.328428	33.97	58.1	141.9	40.98	44.56	High	High	Peak Found	High	Peak Found	Not Found	1		3	2	Present Both	1	GLYMA_02G244300	GLYMA_02G244300	sp|Q9FHQ3|HS157_ARATH	15.7 kDa heat shock protein, peroxisomal GN=HSP15.7	ident:90/144 pos:109/144 query:144 hit:137 align:143 bit:172.9	OK	15.7 kDa heat shock protein, peroxisomal (AtHsp15.7)	na	HS157_ARATH	Q9FHQ3	na	HSP15.7	na	Arabidopsis thaliana (Mouse-ear cress)	3702
High	Master Protein	GLYMA_03G065000	K02709 - photosystem II PsbH protein (psbH) (1 of 2)	0	38.461	23	2	21	2	73	7.8	4.55	70.49	2	0	0.887	0.963822	36.67	114.7	85.3	34.22	60.89	High	High	High	High	High	High	1		3	3	Present Both	1	GLYMA_03G065000	GLYMA_03G065000	sp|P56780|PSBH_ARATH	Photosystem II reaction center protein H GN=psbH	ident:58/73 pos:62/73 query:73 hit:73 align:73 bit:117.5	OK	Photosystem II reaction center protein H (PSII-H)	Photosystem II 10 kDa phosphoprotein	PSBH_ARATH	P56780	na	psbH	na	Arabidopsis thaliana (Mouse-ear cress)	3702
High	Master Protein	GLYMA_11G054900	PTHR13593:SF52 - F14J22.5 PROTEIN-RELATED (1 of 6)	0	38.452	12	3	9	3	421	46.1	7.5	25.71	3	0	0.433	0.0951426	18.24	134.8	65.2	68.13	138.9	High	Peak Found	High	Peak Found	Peak Found	High	1		3	3	Present Both	1	GLYMA_11G054900	GLYMA_11G054900	sp|Q93XX5|Y5713_ARATH	PI-PLC X domain-containing protein At5g67130 GN=YAO	ident:182/421 pos:243/421 query:421 hit:426 align:339 bit:401.4	Poor_match	PI-PLC X domain-containing protein At5g67130	na	Y5713_ARATH	Q93XX5	Q8LAF6; Q9FHA0	OrderedLocusNames=At5g67130	na	Arabidopsis thaliana (Mouse-ear cress)	3702
High	Master Protein	GLYMA_12G031800	PTHR10795//PTHR10795:SF442 - PROPROTEIN CONVERTASE SUBTILISIN/KEXIN // SUBFAMILY NOT NAMED (1 of 3)	0	38.236	11	6	17	3	773	81.9	9.1	54.46	6	3	1.072	0.963822	25.72	103.9	96.1	73.01	70.38	High	High	Not Found	High	High	Peak Found	1		2	3	Present Both	1	GLYMA_12G031800	GLYMA_12G031800	sp|O49607|SBT16_ARATH	Subtilisin-like protease SBT1.6 GN=SBT1.6	ident:573/773 pos:661/773 query:773 hit:764 align:764 bit:1199.1	OK	Subtilisin-like protease SBT1.6	Subtilase subfamily 1 member 6 (AtSBT1.6); Subtilisin-like serine protease 2 (At-SLP2)	SBT16_ARATH	O49607	na	SBT1.6	na	Arabidopsis thaliana (Mouse-ear cress)	3702
High	Master Protein	GLYMA_07G183000	PTHR13523 - COILED-COIL-HELIX-COILED-COIL-HELIX DOMAIN CONTAINING 2/NUR77 (1 of 3)	0	38.151	40	2	12	2	141	14.2	8.87	36.57	2	0	1.118	0.930982	37.51	91.6	108.4	49.46	45.83	High	High	High	High	Peak Found	High	1		3	3	Present Both	1	GLYMA_07G183000	GLYMA_07G183000	sp|Q9FLQ7|FH20_ARATH	Formin-like protein 20 GN=FH20	ident:14/141 pos:17/141 query:141 hit:1649 align:32 bit:28.5	Partial_match_both	Formin-like protein 20 (AtFH20)	na	FH20_ARATH	Q9FLQ7	Q9FLQ8	FH20	na	Arabidopsis thaliana (Mouse-ear cress)	3702
High	Master Protein	GLYMA_09G227200	K02863 - large subunit ribosomal protein L1 (RP-L1, MRPL1, rplA) (1 of 2)	0	38.056	21	7	17	7	345	37.9	9.2	39.22	7	0	0.7	0.657549	24.02	106	94	14.46	29.21	High	High	High	High	High	High	1		3	3	Present Both	1	GLYMA_09G227200	GLYMA_09G227200	sp|Q9LY66|RK1_ARATH	50S ribosomal protein L1, chloroplastic GN=RPL1	ident:245/345 pos:279/345 query:345 hit:346 align:361 bit:464.5	OK	50S ribosomal protein L1, chloroplastic	CL1	RK1_ARATH	Q9LY66	Q9LWB4	RPL1	na	Arabidopsis thaliana (Mouse-ear cress)	3702
High	Master Protein	GLYMA_19G061100	PTHR24012:SF426 - RNA-BINDING PROTEIN-RELATED (1 of 4)	0	37.957	18	6	14	3	374	39.1	6.98	48.37	6	2	1.406	0.624475	55.84	89.6	110.4	56.91	55.34	High	High	Not Found	High	High	Not Found	1		2	2	Present Both	1	GLYMA_19G061100	GLYMA_19G061100	sp|Q8W034|RNP1_ARATH	Heterogeneous nuclear ribonucleoprotein 1 GN=RNP1	ident:81/374 pos:126/374 query:374 hit:411 align:188 bit:175.3	Partial_match_both	Heterogeneous nuclear ribonucleoprotein 1 (hnRNP1)	na	RNP1_ARATH	Q8W034	O23288	RNP1	na	Arabidopsis thaliana (Mouse-ear cress)	3702
High	Master Protein	GLYMA_13G336100	PTHR15371:SF2 - OUTER ENVELOPE PORE PROTEIN 16-1, CHLOROPLASTIC (1 of 3)	0	37.877	40	4	14	3	143	15.3	8.63	39.39	4	1	1.617	0.509673	61.15	76	124	23.47	17.36	High	High	Peak Found	Peak Found	Peak Found	High	1		3	3	Present Both	1	GLYMA_13G336100	GLYMA_13G336100	sp|Q9ZV24|OP161_ARATH	Outer envelope pore protein 16-1, chloroplastic GN=OEP161	ident:90/143 pos:108/143 query:143 hit:148 align:143 bit:191.4	OK	Outer envelope pore protein 16-1, chloroplastic	Chloroplastic outer envelope pore protein of 16 kDa 1 (AtOEP16-1; OEP16-1); Outer plastid envelope protein 16-L (AtOEP16-L; Leave outer plastid envelope protein 16); Protochlorophyllide-dependent translocon protein 16 (Ptc16)	OP161_ARATH	Q9ZV24	Q8LGH9	OEP161	PTC16	Arabidopsis thaliana (Mouse-ear cress)	3702
High	Master Protein	GLYMA_20G116100	PTHR12934:SF11 - 50S RIBOSOMAL PROTEIN L15, CHLOROPLASTIC (1 of 2)	0	37.832	26	6	22	6	256	27.6	10.99	61.74	6	0	0.865	0.944776	23.98	107.2	92.8	13.53	15.85	High	High	High	High	High	High	1		3	3	Present Both	1	GLYMA_20G116100	GLYMA_20G116100	sp|P25873|RK15_ARATH	50S ribosomal protein L15, chloroplastic GN=RPL15	ident:171/256 pos:191/256 query:256 hit:277 align:238 bit:326.6	OK	50S ribosomal protein L15, chloroplastic	CL15	RK15_ARATH	P25873	Q9LU99	RPL15	na	Arabidopsis thaliana (Mouse-ear cress)	3702
High	Master Protein	GLYMA_06G137800	K03626 - nascent polypeptide-associated complex subunit alpha (EGD2, NACA) (1 of 8)	0	37.503	26	5	12	5	225	24.4	4.54	38.81	5	0	0.939	0.974214	16.42	132.2	67.8	16.34	10.49	High	High	Not Found	High	Peak Found	Not Found	1		2	2	Present Both	1	GLYMA_06G137800	GLYMA_06G137800	sp|Q94JX9|NACA2_ARATH	Nascent polypeptide-associated complex subunit alpha-like protein 2 GN=NAC096	ident:151/225 pos:179/225 query:225 hit:217 align:225 bit:248.4	OK	Nascent polypeptide-associated complex subunit alpha-like protein 2 (NAC-alpha-like protein 2)	Alpha-NAC-like protein 2	NACA2_ARATH	Q94JX9	Q9S7G0	OrderedLocusNames=At3g49470	na	Arabidopsis thaliana (Mouse-ear cress)	3702
High	Master Protein	GLYMA_07G244900	PTHR22904:SF169 - RNA POLYMERASE II-ASSOCIATED PROTEIN 3 (1 of 2)	0	37.012	18	6	15	5	478	50	8.18	55.52	6	1	2.164	0.0521847	85.41	64	136	14.92	86.09	High	High	Not Found	High	High	Peak Found	1		2	3	Present Both	1	GLYMA_07G244900	GLYMA_07G244900	sp|Q38931|FKB62_ARATH	Peptidyl-prolyl cis-trans isomerase FKBP62 GN=FKBP62	ident:33/478 pos:56/478 query:478 hit:551 align:106 bit:58.5	Partial_match_both	Peptidyl-prolyl cis-trans isomerase FKBP62 (PPIase FKBP62)	70 kDa peptidyl-prolyl isomerase; FK506-binding protein 62 (AtFKBP62); Immunophilin FKBP62; Peptidylprolyl isomerase ROF1; Protein ROTAMASE FKBP 1; Rotamase	FKB62_ARATH	Q38931	Q38949; Q9LSF3	FKBP62	ROF1	Arabidopsis thaliana (Mouse-ear cress)	3702
High	Master Protein	GLYMA_04G167900	K08910 - light-harvesting complex I chlorophyll a/b binding protein 4 (LHCA4) (1 of 2)	0	36.944	16	2	11	2	252	28	7.42	39.8	2	0	1.125	0.963822	51.47	119.4	80.6	17.71	91.67	High	High	High	High	High	High	1		3	3	Present Both	1	GLYMA_04G167900	GLYMA_04G167900	sp|P27521|CA4_ARATH	Chlorophyll a-b binding protein 4, chloroplastic GN=LHCA4	ident:211/252 pos:227/252 query:252 hit:251 align:249 bit:444.5	OK	Chlorophyll a-b binding protein 4, chloroplastic	LHCI type III CAB-4	CA4_ARATH	P27521	na	LHCA4	CAB4	Arabidopsis thaliana (Mouse-ear cress)	3702
High	Master Protein	GLYMA_19G110900	K11128 - H/ACA ribonucleoprotein complex subunit 1 (GAR1, NOLA1) (1 of 2)	0	36.929	23	5	16	5	204	20.7	11.49	53.86	5	0	1.623	0.400332	38.51	65.9	134.1	38.93	68.83	High	High	Peak Found	High	High	High	1		3	3	Present Both	1	GLYMA_19G110900	GLYMA_19G110900	sp|Q8VZT0|NLAL1_ARATH	Putative H/ACA ribonucleoprotein complex subunit 1-like protein 1 GN=NOI4	ident:111/204 pos:119/204 query:204 hit:202 align:151 bit:191.4	OK	Putative H/ACA ribonucleoprotein complex subunit 1-like protein 1	na	NLAL1_ARATH	Q8VZT0	Q8LG22; Q9S715	OrderedLocusNames=At3g03920	na	Arabidopsis thaliana (Mouse-ear cress)	3702
High	Master Protein	GLYMA_05G001100	K02890 - large subunit ribosomal protein L22 (RP-L22, MRPL22, rplV) (1 of 3)	0	36.884	28	4	16	4	209	22.9	10.13	52.41	4	0	0.968	0.999087	49.12	105	95	15.84	14.88	High	High	High	High	High	High	1		3	3	Present Both	1	GLYMA_05G001100	GLYMA_05G001100	sp|P56795|RK22_ARATH	50S ribosomal protein L22, chloroplastic GN=rpl22	ident:71/209 pos:91/209 query:209 hit:160 align:111 bit:155.2	Poor_match	50S ribosomal protein L22, chloroplastic	na	RK22_ARATH	P56795	na	rpl22	na	Arabidopsis thaliana (Mouse-ear cress)	3702
High	Master Protein	GLYMA_09G154800		0	36.768	23	3	8	3	133	13.7	8.81	28.51	3	0	1.418	0.700252	55.24	99.6	100.4	13.33	32.8	High	High	Not Found	High	Peak Found	Peak Found	1		2	3	Present Both	1	GLYMA_09G154800	GLYMA_09G154800	sp|P42735|CDI8_ARATH	Cadmium-induced protein AS8 GN=APC6	ident:33/133 pos:51/133 query:133 hit:171 align:115 bit:33.1	Poor_match	Cadmium-induced protein AS8	na	CDI8_ARATH	P42735	na	OrderedLocusNames=At4g19070	na	Arabidopsis thaliana (Mouse-ear cress)	3702
High	Master Protein	GLYMA_14G189400	4.1.2.13 - Fructose-bisphosphate aldolase / Fructose-1,6-bisphosphate triosephosphate-lyase (1 of 15)	0	36.714	17	6	15	1	358	38.3	7.53	41.18	6	0	0.915	0.90646	9.64	104.5	95.5		10.96	Not Found	Not Found	Peak Found	Not Found	Peak Found	High	1		1	2	Only Sample	1	GLYMA_14G189400	GLYMA_14G189400	sp|Q9SJQ9|ALFC6_ARATH	Fructose-bisphosphate aldolase 6, cytosolic GN=FBA6	ident:313/358 pos:332/358 query:358 hit:358 align:358 bit:647.1	OK	Fructose-bisphosphate aldolase 6, cytosolic (AtFBA6)	Cytosolic aldolase 2 (cAld2)	ALFC6_ARATH	Q9SJQ9	na	FBA6	na	Arabidopsis thaliana (Mouse-ear cress)	3702
High	Master Protein	GLYMA_02G222400	4.1.2.13 - Fructose-bisphosphate aldolase / Fructose-1,6-bisphosphate triosephosphate-lyase (1 of 15)	0	36.677	16	6	15	1	358	38.2	7.55	40.93	6	5	0.756	0.763418	28.62	111	89	54.39	7.46	Peak Found	Peak Found	High	Not Found	Not Found	Not Found	1		3	0	Only Control	1	GLYMA_02G222400	GLYMA_02G222400	sp|Q9SJQ9|ALFC6_ARATH	Fructose-bisphosphate aldolase 6, cytosolic GN=FBA6	ident:307/358 pos:331/358 query:358 hit:358 align:358 bit:639.8	OK	Fructose-bisphosphate aldolase 6, cytosolic (AtFBA6)	Cytosolic aldolase 2 (cAld2)	ALFC6_ARATH	Q9SJQ9	na	FBA6	na	Arabidopsis thaliana (Mouse-ear cress)	3702
High	Master Protein	GLYMA_17G122500	PTHR11071:SF244 - CYCLOPHILIN-LIKE PEPTIDYL-PROLYL CIS-TRANS ISOMERASE FAMILY PROTEIN (1 of 2)	0	36.536	22	6	23	2	350	38.2	5.71	59.95	6	0	0.993	0.974214	64.98	78	122	77.81	78.84	High	High	High	Peak Found	Peak Found	Peak Found	1		3	3	Present Both	1	GLYMA_17G122500	GLYMA_17G122500	sp|F4HTT6|CP26B_ARATH	Peptidyl-prolyl cis-trans isomerase CYP26-2, chloroplastic GN=CYP26-2	ident:155/350 pos:184/350 query:350 hit:317 align:232 bit:314.3	Poor_match	Peptidyl-prolyl cis-trans isomerase CYP26-2, chloroplastic (PPIase CYP26-2)	Cyclophilin of 26 kDa 2; Cyclophilin-26-2	CP26B_ARATH	F4HTT6	Q8W4C6; Q9C9C7	CYP26-2	na	Arabidopsis thaliana (Mouse-ear cress)	3702
High	Master Protein	GLYMA_11G037500	KOG1698 - Mitochondrial/chloroplast ribosomal protein L19 (1 of 1)	0	36.484	21	2	3	2	213	23.7	10.02	17.01	2	0	0.01	1.22204e-16		200				High	High	Not Found	Not Found	Not Found	Not Found	1		2	0	Only Control	1	GLYMA_11G037500	GLYMA_11G037500	sp|Q8W463|RK191_ARATH	50S ribosomal protein L19-1, chloroplastic GN=RPL12B	ident:122/213 pos:136/213 query:213 hit:225 align:165 bit:216.1	OK	50S ribosomal protein L19-1, chloroplastic	na	RK191_ARATH	Q8W463	O23597	OrderedLocusNames=At4g17560	na	Arabidopsis thaliana (Mouse-ear cress)	3702
High	Master Protein	GLYMA_13G081500	K14677 - aminoacylase (ACY1) (1 of 2)	0	35.917	17	6	11	6	498	55.8	6.98	22.51	6	0	0.852	0.92428	71.81	157.4	42.6	21.19	120.07	Peak Found	High	High	Peak Found	Peak Found	High	1		3	3	Present Both	1	GLYMA_13G081500	GLYMA_13G081500	sp|Q9C5C4|ARGE_ARATH	Acetylornithine deacetylase GN=ARF23	ident:65/498 pos:109/498 query:498 hit:440 align:277 bit:45.1	Poor_match	Acetylornithine deacetylase	N-acetylornithinase (AO; Acetylornithinase; NAO)	ARGE_ARATH	Q9C5C4	O23622; O49682	OrderedLocusNames=At4g17830	na	Arabidopsis thaliana (Mouse-ear cress)	3702
High	Master Protein	GLYMA_08G038100	PTHR12383:SF25 - CHLOROPLAST PROCESSING PEPTIDASE (1 of 2)	0	35.909	17	5	8	5	293	32.3	6.27	20.22	5	0	0.991	0.999087	49.29	82.1	117.9	31.55	48.98	High	High	High	High	Peak Found	High	1		3	3	Present Both	1	GLYMA_08G038100	GLYMA_08G038100	sp|Q8H0W1|PLSP1_ARATH	Chloroplast processing peptidase GN=PLSP1	ident:179/293 pos:206/293 query:293 hit:291 align:270 bit:334.7	OK	Chloroplast processing peptidase	Signal peptidase I-3	PLSP1_ARATH	Q8H0W1	Q66GJ6; Q9LV44	PLSP1	na	Arabidopsis thaliana (Mouse-ear cress)	3702
High	Master Protein	GLYMA_01G062300	K09564 - peptidyl-prolyl isomerase E (cyclophilin E) (PPIE) (1 of 2)	0	35.87	35	3	10	1	172	19.5	4.65	38.67	3	1	1.139	0.921221	21.69	95.7	104.3	9.43	43.46	Peak Found	High	Not Found	High	High	Not Found	1		2	2	Present Both	1	GLYMA_01G062300	GLYMA_01G062300	sp|Q9FNR1|RBG3_ARATH	Glycine-rich RNA-binding protein 3, mitochondrial GN=RBG3	ident:33/172 pos:51/172 query:172 hit:309 align:75 bit:73.6	Partial_match_both	Glycine-rich RNA-binding protein 3, mitochondrial (AtGR-RBP3)	AtRBG3; Mitochondrial RNA-binding protein 2a (At-mRBP2a); Organelle RRM domain-containing protein 3	RBG3_ARATH	Q9FNR1	na	RBG3	na	Arabidopsis thaliana (Mouse-ear cress)	3702
High	Master Protein	GLYMA_15G026300	K15718 - linoleate 9S-lipoxygenase (LOX1_5) (1 of 21)	0	35.821	9	7	26	1	857	96.7	6.58	65.46	7	0	0.692	0.662951	7.1	118.2	81.8		14.06	High	High	Peak Found	Peak Found	Not Found	High	1		3	2	Present Both	1	GLYMA_15G026300	GLYMA_15G026300	sp|Q06327|LOX1_ARATH	Linoleate 9S-lipoxygenase 1 GN=LOX1	ident:526/857 pos:668/857 query:857 hit:859 align:867 bit:1086.6	OK	Linoleate 9S-lipoxygenase 1	Lipoxygenase 1 (AtLOX1)	LOX1_ARATH	Q06327	Q9FZ30	LOX1	na	Arabidopsis thaliana (Mouse-ear cress)	3702
High	Master Protein	GLYMA_09G000500	PTHR33432:SF5 - EMSY N TERMINUS (ENT) DOMAIN-CONTAINING PROTEIN-RELATED (1 of 4)	0	35.78	17	6	10	6	470	51.4	8.06	29.33	6	0	0.759	0.770402	24.2	109.7	90.3	41.39	59.01	High	High	Peak Found	High	Peak Found	High	1		3	3	Present Both	1	GLYMA_09G000500	GLYMA_09G000500	sp|F4K2F0|EML3_ARATH	Protein EMSY-LIKE 3 GN=EML3	ident:249/470 pos:301/470 query:470 hit:397 align:425 bit:435.6	OK	Protein EMSY-LIKE 3 (AtEML3)	na	EML3_ARATH	F4K2F0	Q9LXT7	EML3	na	Arabidopsis thaliana (Mouse-ear cress)	3702
High	Master Protein	GLYMA_05G066100	PTHR14154//PTHR14154:SF14 - UPF0041 BRAIN PROTEIN 44-RELATED // SUBFAMILY NOT NAMED (1 of 3)	0	35.731	14	5	19	3	264	29.5	5.11	52.63	5	0	0.892	0.963822	36.29	120.8	79.2	66.62	17.26	High	High	High	High	Peak Found	High	1		3	3	Present Both	1	GLYMA_05G066100	GLYMA_05G066100	sp|Q9SYX1|LIL31_ARATH	Light-harvesting complex-like protein 3 isotype 1, chloroplastic GN=LIL3.1	ident:156/264 pos:185/264 query:264 hit:262 align:258 bit:297.4	OK	Light-harvesting complex-like protein 3 isotype 1, chloroplastic	LHC-like protein 3 isoform 1	LIL31_ARATH	Q9SYX1	O23601; Q8LC02	LIL3.1	na	Arabidopsis thaliana (Mouse-ear cress)	3702
High	Master Protein	GLYMA_04G016800	PTHR13711:SF222 - HIGH MOBILITY GROUP B PROTEIN 4-RELATED (1 of 2)	0	35.73	15	3	16	3	181	20.2	8.29	61.22	3	0	0.635	0.511488	29.89	117.6	82.4	9.11	60.14	High	High	High	High	High	Not Found	1		3	2	Present Both	1	GLYMA_04G016800	GLYMA_04G016800	sp|O49596|HMGB2_ARATH	High mobility group B protein 2 GN=HMGB2	ident:94/181 pos:113/181 query:181 hit:144 align:137 bit:165.6	OK	High mobility group B protein 2	High mobility group protein B 1 (AtHMGbeta1; HMG beta 1); Nucleosome/chromatin assembly factor group D 02 (Nucleosome/chromatin assembly factor group D 2)	HMGB2_ARATH	O49596	A8MQZ3; Q2V4M2; Q9LM85	HMGB2	HMGB1; HMGBETA1; NFD02; NFD2	Arabidopsis thaliana (Mouse-ear cress)	3702
High	Master Protein	GLYMA_14G207800	3.6.1.23 - dUTP diphosphatase / dUTPase (1 of 2)	0	35.627	33	4	19	4	212	22.8	7.74	65.19	4	0	1.812	0.320959	77.69	78.6	121.4	88.03	71.76	High	High	High	High	High	High	1		3	3	Present Both	1	GLYMA_14G207800	GLYMA_14G207800	sp|Q9STG6|DUT_ARATH	Deoxyuridine 5'-triphosphate nucleotidohydrolase GN=DUT	ident:129/212 pos:148/212 query:212 hit:166 align:163 bit:257.3	OK	Deoxyuridine 5'-triphosphate nucleotidohydrolase (dUTPase)	dUTP pyrophosphatase; dUTP-pyrophosphatase-like 1 (AtDUT1)	DUT_ARATH	Q9STG6	na	DUT	DUT1	Arabidopsis thaliana (Mouse-ear cress)	3702
High	Master Protein	GLYMA_05G056100	PTHR11709:SF82 - MONOCOPPER OXIDASE-LIKE PROTEIN SKU5 (1 of 5)	0	35.49	13	7	12	7	597	67.1	9.06	28.05	7	0	0.993	0.999087	66.99	64.3	135.7	118.42	100.77	Peak Found	Peak Found	High	Not Found	Peak Found	High	1		3	2	Present Both	1	GLYMA_05G056100	GLYMA_05G056100	sp|Q9SU40|SKU5_ARATH	Monocopper oxidase-like protein SKU5 GN=SKU5	ident:453/597 pos:497/597 query:597 hit:587 align:567 bit:953.4	OK	Monocopper oxidase-like protein SKU5	Skewed roots	SKU5_ARATH	Q9SU40	Q0WM56; Q8H7C9	SKU5	na	Arabidopsis thaliana (Mouse-ear cress)	3702
High	Master Protein	GLYMA_02G255500	K02941 - large subunit ribosomal protein LP0 (RP-LP0, RPLP0) (1 of 5)	0	35.353	12	3	11	3	320	34.1	5.25	49.66	3	0	0.785	0.820059	24.73	110.4	89.6	21.29	46.54	High	High	Peak Found	High	High	High	1		3	3	Present Both	1	GLYMA_02G255500	GLYMA_02G255500	sp|O04204|RLA01_ARATH	60S acidic ribosomal protein P0-1 GN=RPP0A	ident:264/320 pos:287/320 query:320 hit:317 align:319 bit:512.7	OK	60S acidic ribosomal protein P0-1	na	RLA01_ARATH	O04204	na	RPP0A	na	Arabidopsis thaliana (Mouse-ear cress)	3702
High	Master Protein	GLYMA_01G205400	PTHR15680:SF10 - 50S RIBOSOMAL PROTEIN L19-1, CHLOROPLASTIC-RELATED (1 of 2)	0	35.342	24	2	11	2	213	23.7	10.07	72.26	2	0	0.515	0.186876	2.18	132	68	7.82		High	High	High	High	High	High	1		3	3	Present Both	1	GLYMA_01G205400	GLYMA_01G205400	sp|Q8W463|RK191_ARATH	50S ribosomal protein L19-1, chloroplastic GN=RPL12B	ident:122/213 pos:142/213 query:213 hit:225 align:166 bit:219.6	OK	50S ribosomal protein L19-1, chloroplastic	na	RK191_ARATH	Q8W463	O23597	OrderedLocusNames=At4g17560	na	Arabidopsis thaliana (Mouse-ear cress)	3702
High	Master Protein	GLYMA_05G074400	K00413 - ubiquinol-cytochrome c reductase cytochrome c1 subunit (CYC1, CYT1, petC) (1 of 4)	0	35.2	11	2	12	2	308	33.9	7.21	45.91	2	0	0.529	0.215	25.36	152.1	47.9	57.48	44.79	High	High	High	High	High	High	1		3	3	Present Both	1	GLYMA_05G074400	GLYMA_05G074400	sp|Q9FKS5|CYC1B_ARATH	Cytochrome c1 2, heme protein, mitochondrial GN=CYC12	ident:258/308 pos:280/308 query:308 hit:307 align:308 bit:497.7	OK	Cytochrome c1 2, heme protein, mitochondrial	Complex III subunit 4-2; Complex III subunit IV-2; Cytochrome b-c1 complex subunit 4-2; Ubiquinol-cytochrome-c reductase complex cytochrome c1 subunit 2 (Cytochrome c-1 2)	CYC1B_ARATH	Q9FKS5	F4KIR8; Q0WL66; Q0WNJ4; Q42065; Q94A63	CYC12	na	Arabidopsis thaliana (Mouse-ear cress)	3702
High	Master Protein	GLYMA_10G053100	K02870 - large subunit ribosomal protein L12e (RP-L12e, RPL12) (1 of 4)	0	35.117	31	4	22	1	166	17.7	8.7	69.09	4	0	2.735	0.199531	51.26	52.5	147.5	61.06	34.17	Peak Found	Peak Found	Peak Found	High	Not Found	High	1		3	2	Present Both	1	GLYMA_10G053100	GLYMA_10G053100	sp|P50883|RL121_ARATH	60S ribosomal protein L12-1 GN=RPL12A	ident:145/166 pos:158/166 query:166 hit:166 align:164 bit:301.2	OK	60S ribosomal protein L12-1	na	RL121_ARATH	P50883	Q9ZQD3	RPL12A	na	Arabidopsis thaliana (Mouse-ear cress)	3702
High	Master Protein	GLYMA_07G020000	K02937 - large subunit ribosomal protein L7e (RP-L7e, RPL7) (1 of 6)	0	34.806	31	5	11	5	243	28.4	9.99	29.61	5	0	1.583	0.454856	40.54	86.9	113.1	42.05	29.15	High	High	High	High	High	High	1		3	3	Present Both	1	GLYMA_07G020000	GLYMA_07G020000	sp|Q9LHP1|RL74_ARATH	60S ribosomal protein L7-4 GN=RPL7D	ident:207/243 pos:228/243 query:243 hit:244 align:240 bit:431.8	OK	60S ribosomal protein L7-4	na	RL74_ARATH	Q9LHP1	na	RPL7D	na	Arabidopsis thaliana (Mouse-ear cress)	3702
High	Master Protein	GLYMA_18G021100	K18592 - gamma-glutamyltranspeptidase / glutathione hydrolase / leukotriene-C4 hydrolase (GGT1_5) (1 of 3)	0	34.774	11	4	11	4	624	67.2	9.41	42.4	4	0	0.883	0.959348	35.07	137.1	62.9	51.03	74.47	High	High	Peak Found	High	Peak Found	High	1		3	3	Present Both	1	GLYMA_18G021100	GLYMA_18G021100	sp|Q8VYW6|GAGT1_ARATH	Glutathione hydrolase 1 GN=GGT1	ident:368/624 pos:434/624 query:624 hit:572 align:560 bit:736.1	OK	Glutathione hydrolase 1	Gamma-glutamyltransferase 1; Gamma-glutamyltranspeptidase 1	GAGT1_ARATH	Q8VYW6	B9DI67; O65652	GGT1	na	Arabidopsis thaliana (Mouse-ear cress)	3702
High	Master Protein	GLYMA_17G053800	PTHR11875//PTHR11875:SF73 - TESTIS-SPECIFIC Y-ENCODED PROTEIN // SUBFAMILY NOT NAMED (1 of 2)	0	34.769	10	2	4	2	379	43.5	4.5	17.75	2	0	0.888	0.957425	38.64	146.7	53.3	6.89	80.46	Peak Found	High	Not Found	High	Peak Found	Peak Found	1		2	3	Present Both	1	GLYMA_17G053800	GLYMA_17G053800	sp|Q9ZUP3|NAP1B_ARATH	Nucleosome assembly protein 1 GN=NAP1	ident:236/379 pos:273/379 query:379 hit:379 align:300 bit:450.7	OK	Nucleosome assembly protein 1;2 (AtNAP1;2)	Nucleosome/chromatin assembly factor group A2	NAP1B_ARATH	Q9ZUP3	B9DFH2	NAP1	NFA2	Arabidopsis thaliana (Mouse-ear cress)	3702
High	Master Protein	GLYMA_03G192100	PTHR21470 - NTKL-BINDING PROTEIN 1 (1 of 6)	0	34.704	34	5	19	3	164	19.2	7.34	48.52	5	2	0.953	0.993925	40.18	119.9	80.1	29.2	68.66	High	High	High	High	Peak Found	Peak Found	1		3	3	Present Both	1	GLYMA_03G192100	GLYMA_03G192100	sp|O64584|WAP_ARATH	WPP domain-associated protein GN=WAP	ident:19/164 pos:36/164 query:164 hit:825 align:63 bit:31.2	Partial_match_both	WPP domain-associated protein	na	WAP_ARATH	O64584	na	WAP	na	Arabidopsis thaliana (Mouse-ear cress)	3702
High	Master Protein	GLYMA_08G149000	PTHR33405:SF6 - PROTEIN FLX-LIKE 1 (1 of 3)	0	34.695	16	3	7	3	329	36.2	7.42	24.49	3	0	0.995	0.999087	44.45	133.7	66.3	10.66	44.85	High	High	Not Found	High	High	Peak Found	1		2	3	Present Both	1	GLYMA_08G149000	GLYMA_08G149000	sp|Q93V84|FLXL1_ARATH	Protein FLX-like 1 GN=FLXL1	ident:170/329 pos:215/329 query:329 hit:331 align:327 bit:292.4	OK	Protein FLX-like 1 (AtFLXL1)	na	FLXL1_ARATH	Q93V84	Q9LUC0	FLXL1	FLL1	Arabidopsis thaliana (Mouse-ear cress)	3702
High	Master Protein	GLYMA_13G221500	K02923 - large subunit ribosomal protein L38e (RP-L38e, RPL38) (1 of 6)	0	34.63	34	3	27	3	80	9.2	9.82	80.05	3	0	2.218	0.0445305	62.98	65.1	134.9	36.73	20	High	High	High	High	High	High	1		3	3	Present Both	1	GLYMA_13G221500	GLYMA_13G221500	sp|O22860|RL38_ARATH	60S ribosomal protein L38 GN=RPL38B	ident:64/80 pos:67/80 query:80 hit:69 align:68 bit:132.1	OK	60S ribosomal protein L38	na	RL38_ARATH	O22860	Q1WW90	RPL38A	RPL38	Arabidopsis thaliana (Mouse-ear cress)	3702
High	Master Protein	GLYMA_11G086200	K11099 - small nuclear ribonucleoprotein G (SNRPG, SMG) (1 of 3)	0	34.616	67	4	12	2	79	8.8	9.25	52.27	4	2	0.605	0.440596	41.11	120.1	79.9	2.05	10.11	High	High	Not Found	High	Peak Found	Not Found	1		2	2	Present Both	1	GLYMA_11G086200	GLYMA_11G086200	sp|O82221|RUXG_ARATH	Probable small nuclear ribonucleoprotein G GN=RXW24L	ident:71/79 pos:75/79 query:79 hit:80 align:79 bit:148.3	OK	Probable small nuclear ribonucleoprotein G (snRNP-G)	Sm protein G (Sm-G; SmG)	RUXG_ARATH	O82221	na	OrderedLocusNames=At2g23930	na	Arabidopsis thaliana (Mouse-ear cress)	3702
High	Master Protein	GLYMA_15G176900	PTHR31238:SF21 - GERMIN-LIKE PROTEIN SUBFAMILY 3 MEMBER 3 (1 of 5)	0	34.574	25	5	10	3	213	22.2	6.52	31.6	5	0	0.01	1.22204e-16		200		29.59		High	High	Not Found	Not Found	Not Found	Not Found	1		2	0	Only Control	1	GLYMA_15G176900	GLYMA_15G176900	sp|P94072|GL33_ARATH	Germin-like protein subfamily 3 member 3 GN=GER3	ident:144/213 pos:176/213 query:213 hit:211 align:211 bit:294.3	OK	Germin-like protein subfamily 3 member 3 (AtGER3; AtGLP2)	na	GL33_ARATH	P94072	P94028	GER3	GLP2A; GLP2B; GLP3; GLP3A; GLP3B	Arabidopsis thaliana (Mouse-ear cress)	3702
High	Master Protein	GLYMA_18G250100	PTHR10795//PTHR10795:SF365 - PROPROTEIN CONVERTASE SUBTILISIN/KEXIN // SUBFAMILY NOT NAMED (1 of 8)	0	34.473	7	5	12	4	802	86	9.14	40.21	5	0	1.644	0.415707	38.11	108.7	91.3	47.98	36.16	High	High	Peak Found	High	High	Not Found	1		3	2	Present Both	1	GLYMA_18G250100	GLYMA_18G250100	sp|Q9ZSP5|AIR3_ARATH	Subtilisin-like protease SBT5.3 GN=AIR3	ident:399/802 pos:510/802 query:802 hit:772 align:762 bit:753.8	Poor_match	Subtilisin-like protease SBT5.3	Auxin-induced in root cultures protein 3; Subtilase subfamily 5 member 3 (AtSBT5.3); Subtilisin-like protease AIR3	AIR3_ARATH	Q9ZSP5	Q8S896; Q8S8B0; Q93W36	AIR3	SBT5.3	Arabidopsis thaliana (Mouse-ear cress)	3702
High	Master Protein	GLYMA_08G150400	3.2.1.119//3.2.1.21 - Beta-glucosidase / Gentobiase (1 of 4)	0	34.439	10	3	7	2	443	50.5	9	26.27	3	1	1.129	0.928691	62.85	109.9	90.1	7.59	20.43	High	High	Peak Found	High	High	Peak Found	1		3	3	Present Both	1	GLYMA_08G150400	GLYMA_08G150400	sp|O64882|BGL17_ARATH	Beta-glucosidase 17 GN=BGLU17	ident:222/443 pos:304/443 query:443 hit:517 align:476 bit:446.4	Poor_match	Beta-glucosidase 17 (AtBGLU17)	na	BGL17_ARATH	O64882	B3H6D8; Q8GY78	BGLU17	na	Arabidopsis thaliana (Mouse-ear cress)	3702
High	Master Protein	GLYMA_08G130200		0	34.393	39	4	15	4	64	7.6	8.54	64.23	4	0	0.909	0.97325	46.35	133.1	66.9	51.4	30.05	High	High	High	High	High	High	1		3	3	Present Both	1	GLYMA_08G130200	GLYMA_08G130200	sp|Q9XIF4|TRXH7_ARATH	Thioredoxin H7 GN=TRX7	ident:12/64 pos:23/64 query:64 hit:129 align:37 bit:26.6	Partial_match_hit	Thioredoxin H7 (AtTrxh7)	na	TRXH7_ARATH	Q9XIF4	na	TRX7	na	Arabidopsis thaliana (Mouse-ear cress)	3702
High	Master Protein	GLYMA_18G065900	PF11493 - Thylakoid soluble phosphoprotein TSP9 (TSP9) (1 of 2)	0	34.201	39	6	15	1	112	11.8	9.31	51.13	6	0	16.035	2.70738e-08	51.69	11.7	188.3	52.27		High	High	High	High	High	High	1		3	3	Present Both	1	GLYMA_18G065900	GLYMA_18G065900	sp|F4IUG9|MYO13_ARATH	Myosin-13 GN=XI-G	ident:19/112 pos:36/112 query:112 hit:1493 align:77 bit:27.7	Partial_match_hit	Myosin-13	Myosin XI G (AtXIG)	MYO13_ARATH	F4IUG9	Q9SK73	XI-G	XIG	Arabidopsis thaliana (Mouse-ear cress)	3702
High	Master Protein	GLYMA_08G313200	PTHR31355:SF7 - MICROTUBULE-ASSOCIATED PROTEIN SPIRAL2-LIKE-RELATED (1 of 2)	0	34.058	8	7	15	3	926	100	5.81	31.6	7	3	0.692	0.639803	10.43	130.8	69.2	34.87	16.95	High	High	High	High	Peak Found	Peak Found	1		3	3	Present Both	1	GLYMA_08G313200	GLYMA_08G313200	sp|Q9T041|TOR1_ARATH	Microtubule-associated protein TORTIFOLIA1 GN=TOR1	ident:531/926 pos:647/926 query:926 hit:864 align:936 bit:928.3	OK	Microtubule-associated protein TORTIFOLIA1	Microtubule-associated protein SPIRAL2; Protein CONVOLUTA	TOR1_ARATH	Q9T041	Q68VK4; Q84MA0	TOR1	na	Arabidopsis thaliana (Mouse-ear cress)	3702
High	Master Protein	GLYMA_02G184000	K02114 - F-type H+-transporting ATPase subunit epsilon (ATPF1E, atpC) (1 of 1)	0	33.952	21	4	21	4	123	13.7	6.79	54.29	4	0	0.54	0.247179	8.29	132.9	67.1	9.86	32.92	High	High	High	High	Peak Found	High	1		3	3	Present Both	1	GLYMA_02G184000	GLYMA_02G184000	sp|P09468|ATPE_ARATH	ATP synthase epsilon chain, chloroplastic GN=atpE	ident:93/123 pos:101/123 query:123 hit:132 align:109 bit:188.7	OK	ATP synthase epsilon chain, chloroplastic	ATP synthase F1 sector epsilon subunit; F-ATPase epsilon subunit	ATPE_ARATH	P09468	na	atpE	na	Arabidopsis thaliana (Mouse-ear cress)	3702
High	Master Protein	GLYMA_15G205900	K03098 - apolipoprotein D and lipocalin family protein (APOD) (1 of 4)	0	33.762	42	6	14	4	184	21.2	8.07	49.23	6	2	1.394	0.629959	38.84	85.1	114.9	54.77	29.06	High	High	Not Found	High	High	High	1		2	3	Present Both	1	GLYMA_15G205900	GLYMA_15G205900	sp|Q9FGT8|TIL_ARATH	Temperature-induced lipocalin-1 GN=TIL	ident:130/184 pos:156/184 query:184 hit:186 align:181 bit:280.0	OK	Temperature-induced lipocalin-1 (AtTIL1)	na	TIL_ARATH	Q9FGT8	Q8LE12	TIL	na	Arabidopsis thaliana (Mouse-ear cress)	3702
High	Master Protein	GLYMA_14G038500	PTHR11413//PTHR11413:SF57 - CYSTATIN FAMILY MEMBER // SUBFAMILY NOT NAMED (1 of 2)	0	33.525	47	5	9	5	184	20.8	4.97	29.3	5	0	3.176	0.00551834	65.32	50.8	149.2	91.74		High	Peak Found	High	Not Found	Not Found	High	1		3	1	Only Control	1	GLYMA_14G038500	GLYMA_14G038500	sp|Q8H0X6|CYT6_ARATH	Cysteine proteinase inhibitor 6 GN=CYS6	ident:46/184 pos:62/184 query:184 hit:234 align:87 bit:97.4	Partial_match_both	Cysteine proteinase inhibitor 6 (AtCYS-6)	PIP-M; PRLI-interacting factor M	CYT6_ARATH	Q8H0X6	Q8VZA2; Q9FUB0; Q9LHF9	CYS6	na	Arabidopsis thaliana (Mouse-ear cress)	3702
High	Master Protein	GLYMA_01G132500	PF00234 - Protease inhibitor/seed storage/LTP family (Tryp_alpha_amyl) (1 of 30)	0	33.184	17	3	13	3	118	11.8	8.9	44.37	3	0	1.402	0.620527	44.34	58.8	141.2	23.13	41.14	High	High	High	High	High	High	1		3	3	Present Both	1	GLYMA_01G132500	GLYMA_01G132500	sp|Q9LLR6|NLTP4_ARATH	Non-specific lipid-transfer protein 4 GN=LTP4	ident:64/118 pos:74/118 query:118 hit:112 align:110 bit:114.0	OK	Non-specific lipid-transfer protein 4 (LTP 4)	na	NLTP4_ARATH	Q9LLR6	Q9FIE7	LTP4	na	Arabidopsis thaliana (Mouse-ear cress)	3702
High	Master Protein	GLYMA_10G037400	PTHR34449:SF2 - ATP BINDING / ATPASE-RELATED (1 of 4)	0	32.924	13	4	15	1	374	41.5	5.72	47.59	4	3	0.856	0.941298	54.15	109	91	68.96	79.25	High	Peak Found	Not Found	High	Not Found	Not Found	1		2	1	Only Control	1	GLYMA_10G037400	GLYMA_10G037400	sp|Q94K75|RHON1_ARATH	Rho-N domain-containing protein 1, chloroplastic GN=RHON1	ident:160/374 pos:213/374 query:374 hit:401 align:418 bit:178.7	Poor_match	Rho-N domain-containing protein 1, chloroplastic	na	RHON1_ARATH	Q94K75	A8MQM6; Q8LFT8; Q9LNC8	RHON1	na	Arabidopsis thaliana (Mouse-ear cress)	3702
High	Master Protein	GLYMA_17G134800	K02953 - small subunit ribosomal protein S13e (RP-S13e, RPS13) (1 of 5)	0	32.902	26	7	24	7	151	17.1	10.36	49.47	7	0	0.921	0.974214	47.86	135.7	64.3	37.3	53.52	High	High	High	High	High	High	1		3	3	Present Both	1	GLYMA_17G134800	GLYMA_17G134800	sp|P59224|RS132_ARATH	40S ribosomal protein S13-2 GN=RPS13B	ident:141/151 pos:147/151 query:151 hit:151 align:151 bit:289.3	OK	40S ribosomal protein S13-2	na	RS132_ARATH	P59224	O81311; P49203; Q9SLR4	RPS13B	na	Arabidopsis thaliana (Mouse-ear cress)	3702
High	Master Protein	GLYMA_05G074900	PTHR33180:SF4 - PHOTOSYSTEM II CP43 CHLOROPHYLL APOPROTEIN (1 of 2)	0	32.83	38	3	22	3	64	7.1	7.53	77.56	3	0	1.65	0.349149	123.12	79.1	120.9	142.14	118.82	High	High	High	High	Peak Found	High	1		3	3	Present Both	1	GLYMA_05G074900	GLYMA_05G074900	sp|P56778|PSBC_ARATH	Photosystem II CP43 reaction center protein GN=psbC	ident:53/64 pos:54/64 query:64 hit:473 align:54 bit:111.3	Partial_match_hit	Photosystem II CP43 reaction center protein	PSII 43 kDa protein; Protein CP-43	PSBC_ARATH	P56778	na	psbC	CP43	Arabidopsis thaliana (Mouse-ear cress)	3702
High	Master Protein	GLYMA_07G207800	PTHR13077:SF6 - 15 KDA SELENOPROTEIN (1 of 2)	0	32.727	25	4	12	1	167	18.9	5.25	27.77	4	0	3.745	0.00879934	13.36	42.2	157.8	12.69		Peak Found	High	High	Not Found	Not Found	High	1		3	1	Only Control	1	GLYMA_07G207800	GLYMA_07G207800	sp|O65238|Y5537_ARATH	G-type lectin S-receptor-like serine/threonine-protein kinase At5g35370 GN=CBSDUF5	ident:17/167 pos:20/167 query:167 hit:872 align:37 bit:29.6	Partial_match_both	G-type lectin S-receptor-like serine/threonine-protein kinase At5g35370	na	Y5537_ARATH	O65238	Q0WL86; Q0WVA9; Q9FZP3	OrderedLocusNames=At5g35370	na	Arabidopsis thaliana (Mouse-ear cress)	3702
High	Master Protein	GLYMA_11G245300	PTHR12428:SF18 - ALBINO3-LIKE PROTEIN 1, CHLOROPLASTIC (1 of 2)	0	32.715	8	2	8	2	543	59.3	5.8	26.25	2	0	0.608	0.468717	7.29	126.8	73.2	11.37	17.98	High	High	High	High	Peak Found	High	1		3	3	Present Both	1	GLYMA_11G245300	GLYMA_11G245300	sp|Q9FYL3|ALB4_ARATH	ALBINO3-like protein 1, chloroplastic GN=ALB4	ident:302/543 pos:348/543 query:543 hit:499 align:470 bit:543.5	OK	ALBINO3-like protein 1, chloroplastic	Arabidopsis thaliana envelope membrane integrase; Protein ALBINA 4 (Ath4); Protein ARTEMIS; Suppressor of tic40 protein 1	ALB4_ARATH	Q9FYL3	Q1RPP7; Q9FYL4	ALB4	na	Arabidopsis thaliana (Mouse-ear cress)	3702
High	Master Protein	GLYMA_06G203200	K02136 - F-type H+-transporting ATPase subunit gamma (ATPeF1G, ATP5C1, ATP3) (1 of 2)	0	32.69	19	5	11	5	324	35.4	9.06	32.5	5	0	1.19	0.928237	86.87	102.7	97.3	30	99.28	High	High	High	High	High	High	1		3	3	Present Both	1	GLYMA_06G203200	GLYMA_06G203200	sp|Q96250|ATPG3_ARATH	ATP synthase subunit gamma, mitochondrial GN=ATPC	ident:262/324 pos:288/324 query:324 hit:325 align:329 bit:528.9	OK	ATP synthase subunit gamma, mitochondrial	F-ATPase gamma subunit	ATPG3_ARATH	Q96250	Q7GB12	ATPC	na	Arabidopsis thaliana (Mouse-ear cress)	3702
High	Master Protein	GLYMA_04G060600	PTHR33021:SF8 - EARLY NODULIN-LIKE PROTEIN 1-RELATED (1 of 6)	0	32.683	22	4	11	2	178	19.3	6.93	35.12	4	3	1.344	0.708046	27.54	110.8	89.2	7.05	4.82	High	High	Not Found	High	Peak Found	Not Found	1		2	2	Present Both	1	GLYMA_04G060600	GLYMA_04G060600	sp|Q9SK27|ENL1_ARATH	Early nodulin-like protein 1 GN=GSH1	ident:89/178 pos:118/178 query:178 hit:182 align:157 bit:183.7	Poor_match	Early nodulin-like protein 1	Phytocyanin-like protein	ENL1_ARATH	Q9SK27	Q680Y2	OrderedLocusNames=At2g25060	na	Arabidopsis thaliana (Mouse-ear cress)	3702
High	Master Protein	GLYMA_15G116500	PF10785 - NADH-ubiquinone oxidoreductase complex I, 21 kDa subunit (NADH-u_ox-rdase) (1 of 2)	0	32.644	47	3	18	3	101	11	9.35	56.73	3	0	1.765	0.24465	41.19	81.8	118.2	10.17	22.98	High	High	High	High	High	High	1		3	3	Present Both	1	GLYMA_15G116500	GLYMA_15G116500	sp|Q9SCU0|SDR2A_ARATH	Short-chain dehydrogenase reductase 2a GN=SDR2a	ident:22/101 pos:37/101 query:101 hit:303 align:73 bit:28.1	Partial_match_hit	Short-chain dehydrogenase reductase 2a (AtSDR2a)	na	SDR2A_ARATH	Q9SCU0	na	SDR2a	SDR2	Arabidopsis thaliana (Mouse-ear cress)	3702
High	Master Protein	GLYMA_15G154700	PF05558 - DREPP plasma membrane polypeptide (DREPP) (1 of 2)	0	32.605	23	4	10	4	218	24.3	5.05	37	4	0	0.985	0.990328	80.25	99	101	37.07	73.25	High	High	Peak Found	High	High	High	1		3	3	Present Both	1	GLYMA_15G154700	GLYMA_15G154700	sp|Q96262|PCAP1_ARATH	Plasma membrane-associated cation-binding protein 1 GN=PCAP1	ident:115/218 pos:131/218 query:218 hit:225 align:181 bit:171.8	OK	Plasma membrane-associated cation-binding protein 1 (AtPCAP1)	Microtubule-destabilizing protein 25	PCAP1_ARATH	Q96262	F4JUT4; Q56YV4; Q8H7H8; Q8LDH5	PCAP1	MDP25	Arabidopsis thaliana (Mouse-ear cress)	3702
High	Master Protein	GLYMA_07G003700	K02135 - F-type H+-transporting ATPase subunit epsilon (ATPeF1E, ATP5E, ATP15) (1 of 1)	0	32.54	39	3	23	3	70	7.9	8.91	64.06	3	0	0.672	0.603805	14.4	111.7	88.3	10.64	27.32	High	High	High	High	High	High	1		3	3	Present Both	1	GLYMA_07G003700	GLYMA_07G003700	sp|Q96253|ATP5E_ARATH	ATP synthase subunit epsilon, mitochondrial GN=BLI	ident:54/70 pos:64/70 query:70 hit:70 align:69 bit:125.6	OK	ATP synthase subunit epsilon, mitochondrial (ATPase subunit epsilon)	na	ATP5E_ARATH	Q96253	na	OrderedLocusNames=At1g51650	na	Arabidopsis thaliana (Mouse-ear cress)	3702
High	Master Protein	GLYMA_03G019600	K14324 - histone deacetylase complex subunit SAP18 (SAP18) (1 of 1)	0	32.483	42	7	18	7	151	16.8	9.42	43.32	7	0	0.952	0.987649	52.16	90.9	109.1	50.32	63.42	High	High	High	High	High	High	1		3	3	Present Both	1	GLYMA_03G019600	GLYMA_03G019600	sp|O64644|SAP18_ARATH	Histone deacetylase complex subunit SAP18 GN=SAP12	ident:103/151 pos:121/151 query:151 hit:152 align:151 bit:195.7	OK	Histone deacetylase complex subunit SAP18	18 kDa Sin3-associated polypeptide	SAP18_ARATH	O64644	Q0WTU2; Q8L8K8	OrderedLocusNames=At2g45640	na	Arabidopsis thaliana (Mouse-ear cress)	3702
High	Master Protein	GLYMA_07G226600		0	32.363	41	4	12	3	119	12.2	4.86	42.94	4	0	1.174	0.906801	43.41	107.6	92.4	39.96	54.76	High	High	High	Peak Found	Peak Found	High	1		3	3	Present Both	1	GLYMA_07G226600	GLYMA_07G226600	sp|Q9ZQ80|NDRP1_ARATH	Nodulin-related protein 1 GN=NRP1	ident:55/119 pos:76/119 query:119 hit:187 align:121 bit:83.6	Poor_match	Nodulin-related protein 1 (AtNRP1)	RPS2-interacting protein 11	NDRP1_ARATH	Q9ZQ80	Q84VZ7	NRP1	na	Arabidopsis thaliana (Mouse-ear cress)	3702
High	Master Protein	GLYMA_07G060000	K02932 - large subunit ribosomal protein L5e (RP-L5e, RPL5) (1 of 5)	0	32.211	19	5	12	1	298	34	9.29	34.27	5	0	1.725	0.655206	40.4	73.4	126.6	9.06	39.46	High	Peak Found	Not Found	High	High	Not Found	1		2	2	Present Both	1	GLYMA_07G060000	GLYMA_07G060000	sp|P49227|RL52_ARATH	60S ribosomal protein L5-2 GN=RPL5B	ident:241/298 pos:266/298 query:298 hit:301 align:291 bit:508.8	OK	60S ribosomal protein L5-2	na	RL52_ARATH	P49227	Q41921	RPL5B	na	Arabidopsis thaliana (Mouse-ear cress)	3702
High	Master Protein	GLYMA_16G204000	PTHR11638//PTHR11638:SF105 - ATP-DEPENDENT CLP PROTEASE // SUBFAMILY NOT NAMED (1 of 5)	0	32.177	33	6	19	4	252	27.1	8.69	45.7	6	0	1.257	0.856195	73.58	89.2	110.8	63.91	74.05	High	High	High	High	Peak Found	High	1		3	3	Present Both	1	GLYMA_16G204000	GLYMA_16G204000	sp|Q93WL3|CLPT1_ARATH	ATP-dependent Clp protease ATP-binding subunit CLPT1, chloroplastic GN=CLPT1	ident:126/252 pos:159/252 query:252 hit:238 align:213 bit:245.7	Poor_match	ATP-dependent Clp protease ATP-binding subunit CLPT1, chloroplastic	nClpC-like protein	CLPT1_ARATH	Q93WL3	Q9STK0	CLPT1	na	Arabidopsis thaliana (Mouse-ear cress)	3702
High	Master Protein	GLYMA_02G184800	PTHR15371:SF2 - OUTER ENVELOPE PORE PROTEIN 16-1, CHLOROPLASTIC (1 of 3)	0	32.153	38	3	23	2	143	15.3	8.13	58.45	3	0	1.003	0.989484	53.5	115.6	84.4	21.51	25.41	High	High	High	High	High	High	1		3	3	Present Both	1	GLYMA_02G184800	GLYMA_02G184800	sp|Q9ZV24|OP161_ARATH	Outer envelope pore protein 16-1, chloroplastic GN=OEP161	ident:88/143 pos:105/143 query:143 hit:148 align:143 bit:186.4	OK	Outer envelope pore protein 16-1, chloroplastic	Chloroplastic outer envelope pore protein of 16 kDa 1 (AtOEP16-1; OEP16-1); Outer plastid envelope protein 16-L (AtOEP16-L; Leave outer plastid envelope protein 16); Protochlorophyllide-dependent translocon protein 16 (Ptc16)	OP161_ARATH	Q9ZV24	Q8LGH9	OEP161	PTC16	Arabidopsis thaliana (Mouse-ear cress)	3702
High	Master Protein	GLYMA_01G004300	K02910 - large subunit ribosomal protein L31e (RP-L31e, RPL31) (1 of 5)	0	32.056	27	6	27	4	120	13.9	9.82	58.83	6	3	1.2	0.852529	53.73	84.4	115.6	57.74	32.58	High	High	High	High	High	High	1		3	3	Present Both	1	GLYMA_01G004300	GLYMA_01G004300	sp|Q9SLL7|RL311_ARATH	60S ribosomal protein L31-1 GN=RPL31A	ident:96/120 pos:106/120 query:120 hit:119 align:119 bit:197.6	OK	60S ribosomal protein L31-1	na	RL311_ARATH	Q9SLL7	na	RPL31A	na	Arabidopsis thaliana (Mouse-ear cress)	3702
High	Master Protein	GLYMA_02G270400	PTHR33271:SF7 - PLASTID TRANSCRIPTIONALLY ACTIVE 18 (1 of 2)	0	31.914	47	5	15	5	144	16.6	8.37	45.53	5	0	1.251	0.773088	48.35	107.9	92.1	46.43	61.13	High	High	High	High	High	Peak Found	1		3	3	Present Both	1	GLYMA_02G270400	GLYMA_02G270400	sp|Q9FT77|RLM3_ARATH	Disease resistance protein RLM3 GN=RLM3	ident:14/144 pos:25/144 query:144 hit:796 align:44 bit:26.6	Partial_match_both	Disease resistance protein RLM3	Protein RESISTANCE TO LEPTOSPHAERIA MACULANS 3	RLM3_ARATH	Q9FT77	F4JNC3; Q0WKX9; Q3EA02; Q682W8; Q9SUK2	RLM3	na	Arabidopsis thaliana (Mouse-ear cress)	3702
High	Master Protein	GLYMA_20G149400	K02984 - small subunit ribosomal protein S3Ae (RP-S3Ae, RPS3A) (1 of 5)	0	31.722	23	6	16	2	261	29.7	9.8	44.45	6	0	1.25	0.774564	21.35	88.9	111.1	2.19	43.91	High	Peak Found	High	Peak Found	Peak Found	High	1		3	3	Present Both	1	GLYMA_20G149400	GLYMA_20G149400	sp|Q9CAV0|RS3A1_ARATH	40S ribosomal protein S3a-1 GN=RPS3AA	ident:225/261 pos:246/261 query:261 hit:262 align:262 bit:456.4	OK	40S ribosomal protein S3a-1	na	RS3A1_ARATH	Q9CAV0	na	RPS3AA	na	Arabidopsis thaliana (Mouse-ear cress)	3702
High	Master Protein	GLYMA_09G002100	PTHR11566//PTHR11566:SF69 - DYNAMIN // SUBFAMILY NOT NAMED (1 of 2)	0	31.721	7	5	7	4	922	100.1	9.06	25.31	5	0	0.902	0.963822	34.02	115.5	84.5	68.07	22.02	High	High	Peak Found	High	Peak Found	High	1		3	3	Present Both	1	GLYMA_09G002100	GLYMA_09G002100	sp|Q9LQ55|DRP2B_ARATH	Dynamin-2B GN=DRP2B	ident:730/922 pos:823/922 query:922 hit:920 align:932 bit:1396.3	OK	Dynamin-2B	Dynamin-like protein 3; Dynamin-related protein 2B	DRP2B_ARATH	Q9LQ55	Q9SLT3; Q9SLT4; Q9SXX3	DRP2B	ADL3; CF1	Arabidopsis thaliana (Mouse-ear cress)	3702
High	Master Protein	GLYMA_17G064100	PTHR11743:SF27 - MITOCHONDRIAL OUTER MEMBRANE PROTEIN PORIN 4 (1 of 2)	0	31.656	27	6	11	5	277	29.9	8.92	36.18	6	0	0.659	0.579978	31.76	148.2	51.8	10.55	67.56	High	High	High	High	High	Peak Found	1		3	3	Present Both	1	GLYMA_17G064100	GLYMA_17G064100	sp|Q9FKM2|VDAC4_ARATH	Mitochondrial outer membrane protein porin 4 GN=VDAC4	ident:168/277 pos:212/277 query:277 hit:274 align:277 bit:341.3	OK	Mitochondrial outer membrane protein porin 4	Voltage-dependent anion-selective channel protein 4 (AtVDAC4; VDAC-4)	VDAC4_ARATH	Q9FKM2	na	VDAC4	na	Arabidopsis thaliana (Mouse-ear cress)	3702
High	Master Protein	GLYMA_19G240400	K04565 - superoxide dismutase, Cu-Zn family (SOD1) (1 of 6)	0	31.62	13	2	9	2	152	15.2	5.6	25.98	2	0	1.044	0.974214	97.36	98.1	101.9	31.15	93.68	High	High	High	Peak Found	High	High	1		3	3	Present Both	1	GLYMA_19G240400	GLYMA_19G240400	sp|P24704|SODC1_ARATH	Superoxide dismutase [Cu-Zn] 1 GN=CSD1	ident:126/152 pos:137/152 query:152 hit:152 align:152 bit:255.4	OK	Superoxide dismutase [Cu-Zn] 1	Copper/zinc superoxide dismutase 1	SODC1_ARATH	P24704	A3FMJ0; Q9FRQ6	CSD1	SODCC	Arabidopsis thaliana (Mouse-ear cress)	3702
High	Master Protein	GLYMA_15G034700	K17778 - mitochondrial import inner membrane translocase subunit TIM10 (TIM10) (1 of 4)	0	31.583	46	3	18	1	84	9.6	6.01	47.99	3	0	2.064	0.47285	84.1	55.2	144.8	13.62	55.28	High	High	Not Found	Peak Found	Peak Found	High	1		2	3	Present Both	1	GLYMA_15G034700	GLYMA_15G034700	sp|Q9ZW33|TIM10_ARATH	Mitochondrial import inner membrane translocase subunit TIM10 GN=TIM10	ident:61/84 pos:68/84 query:84 hit:83 align:84 bit:132.5	OK	Mitochondrial import inner membrane translocase subunit TIM10	na	TIM10_ARATH	Q9ZW33	na	TIM10	na	Arabidopsis thaliana (Mouse-ear cress)	3702
High	Master Protein	GLYMA_13G153300	PTHR30314//PTHR30314:SF13 - CELL DIVISION PROTEIN FTSZ-RELATED // SUBFAMILY NOT NAMED (1 of 4)	0	31.366	15	5	9	5	486	51.1	5.53	27.14	5	0	0.667	0.580894	22.61	127.1	72.9	17.59	53.4	High	High	High	High	Peak Found	High	1		3	3	Present Both	1	GLYMA_13G153300	GLYMA_13G153300	sp|O82533|FTZ21_ARATH	Cell division protein FtsZ homolog 2-1, chloroplastic GN=FTSZ2-1	ident:362/486 pos:402/486 query:486 hit:478 align:494 bit:655.2	OK	Cell division protein FtsZ homolog 2-1, chloroplastic (AtFtsZ2-1)	Plastid division protein FTSZ2-1	FTZ21_ARATH	O82533	Q93VK3	FTSZ2-1	na	Arabidopsis thaliana (Mouse-ear cress)	3702
High	Master Protein	GLYMA_11G237200	K14563 - rRNA 2'-O-methyltransferase fibrillarin (NOP1, FBL) (1 of 4)	0	31.208	18	6	13	6	315	33.2	10.04	41.57	6	0	1.288	0.739857	66.64	83.4	116.6	35.8	89.82	High	High	High	High	High	High	1		3	3	Present Both	1	GLYMA_11G237200	GLYMA_11G237200	sp|Q94AH9|MD36A_ARATH	Mediator of RNA polymerase II transcription subunit 36a GN=MED36A	ident:222/315 pos:234/315 query:315 hit:320 align:244 bit:468.0	OK	Mediator of RNA polymerase II transcription subunit 36a	Fibrillarin-like protein 2; Histone-glutamine methyltransferase; rRNA 2'-O-methyltransferase fibrillarin 2	MD36A_ARATH	Q94AH9	Q9SZZ1	MED36A	FIB2; FLP; MED36_1	Arabidopsis thaliana (Mouse-ear cress)	3702
High	Master Protein	GLYMA_12G215900	PTHR12903:SF1 - 50S RIBOSOMAL PROTEIN L24, CHLOROPLASTIC (1 of 2)	0	30.99	20	5	19	2	194	21.4	9.91	52.37	5	0	0.843	0.921221	54.49	129.7	70.3	43.4	66.87	High	High	High	High	High	High	1		3	3	Present Both	1	GLYMA_12G215900	GLYMA_12G215900	sp|P92959|RK24_ARATH	50S ribosomal protein L24, chloroplastic GN=RPL24	ident:117/194 pos:142/194 query:194 hit:198 align:171 bit:252.7	OK	50S ribosomal protein L24, chloroplastic	CL24; Protein SUPPRESSOR OF VARIEGATION 8	RK24_ARATH	P92959	Q9FIU4	RPL24	SVR8	Arabidopsis thaliana (Mouse-ear cress)	3702
High	Master Protein	GLYMA_19G213200	K02885 - large subunit ribosomal protein L19e (RP-L19e, RPL19) (1 of 8)	0	30.803	18	3	7	2	212	24.6	11.44	22.8	3	0	0.01	1.22204e-16		200		4.08		High	High	Not Found	High	Not Found	Not Found	1		2	1	Only Control	1	GLYMA_19G213200	GLYMA_19G213200	sp|Q9LUQ6|RL192_ARATH	60S ribosomal protein L19-2 GN=RPL19B	ident:179/212 pos:187/212 query:212 hit:209 align:212 bit:357.1	OK	60S ribosomal protein L19-2	na	RL192_ARATH	Q9LUQ6	na	RPL19B	na	Arabidopsis thaliana (Mouse-ear cress)	3702
High	Master Protein	GLYMA_16G049000	PTHR36762:SF2 - A.THALIANA MRNA (ORF19) FROM CHROMOSOME III (1 of 2)	0	30.612	12	3	12	3	137	15.1	4.77	31.96	3	0	0.754	0.754933	66.89	95.7	104.3	3.54	80.95	High	High	High	High	High	High	1		3	3	Present Both	1	GLYMA_16G049000	GLYMA_16G049000	sp|Q96500|LIRP1_ARATH	Light-regulated protein 1, chloroplastic GN=LIR1	ident:52/137 pos:64/137 query:137 hit:141 align:85 bit:106.7	Poor_match	Light-regulated protein 1, chloroplastic	Protein CCR-LIKE, chloroplastic	LIRP1_ARATH	Q96500	C0Z293	LIR1	na	Arabidopsis thaliana (Mouse-ear cress)	3702
High	Master Protein	GLYMA_14G052000	PF07172 - Glycine rich protein family (GRP) (1 of 12)	0	30.464	40	1	12	1	131	12.8	7.78	88.4	1	0	0.692	0.655206	28.51	135.2	64.8	26.96	73.33	High	High	High	High	High	High	1		3	3	Present Both	1	GLYMA_14G052000	GLYMA_14G052000	sp|Q9FL76|EXP24_ARATH	Expansin-A24 GN=EXPA24	ident:42/131 pos:52/131 query:131 hit:312 align:122 bit:33.1	Partial_match_hit	Expansin-A24 (AtEXPA24)	Alpha-expansin-24 (At-EXP24; AtEx24); Ath-ExpAlpha-1.19	EXP24_ARATH	Q9FL76	F4KEE0; Q4PSD6	EXPA24	EXP24	Arabidopsis thaliana (Mouse-ear cress)	3702
High	Master Protein	GLYMA_03G040100	PF00234 - Protease inhibitor/seed storage/LTP family (Tryp_alpha_amyl) (1 of 30)	0	30.401	17	1	7	1	122	12.2	8.78	31.57	1	0	0.01	1.22204e-16		200		8.21		High	High	Not Found	High	Not Found	High	1		2	2	Present Both	1	GLYMA_03G040100	GLYMA_03G040100	sp|Q42589|NLTP1_ARATH	Non-specific lipid-transfer protein 1 GN=LTP1	ident:60/122 pos:84/122 query:122 hit:118 align:119 bit:111.7	Poor_match	Non-specific lipid-transfer protein 1 (LTP 1)	na	NLTP1_ARATH	Q42589	na	LTP1	na	Arabidopsis thaliana (Mouse-ear cress)	3702
High	Master Protein	GLYMA_06G097600	PF00515 - Tetratricopeptide repeat (TPR_1) (1 of 67)	0	30.401	22	2	7	2	222	24.2	9.09	41.08	2	0	1.764	0.408513	40.49	122.9	77.1	17.88		High	High	High	High	High	Not Found	1		3	2	Present Both	1	GLYMA_06G097600	GLYMA_06G097600	sp|B9DHG0|PYG7_ARATH	Tetratricopeptide repeat domain-containing protein PYG7, chloroplastic GN=PYG7	ident:20/222 pos:28/222 query:222 hit:301 align:56 bit:35.4	Partial_match_both	Tetratricopeptide repeat domain-containing protein PYG7, chloroplastic	Protein PALE YELLOW GREEN 7	PYG7_ARATH	B9DHG0	O80551; Q8LFF4; Q94EJ1	PYG7	na	Arabidopsis thaliana (Mouse-ear cress)	3702
High	Master Protein	GLYMA_07G059900	K02932 - large subunit ribosomal protein L5e (RP-L5e, RPL5) (1 of 5)	0	30.329	19	5	10	1	298	33.9	9.23	27.88	5	2	0.701	0.727639	12.03	88	112	49.86		Not Found	Not Found	Not Found	High	Not Found	Not Found	1		0	1	Missing Both	1	GLYMA_07G059900	GLYMA_07G059900	sp|P49227|RL52_ARATH	60S ribosomal protein L5-2 GN=RPL5B	ident:241/298 pos:266/298 query:298 hit:301 align:291 bit:509.2	OK	60S ribosomal protein L5-2	na	RL52_ARATH	P49227	Q41921	RPL5B	na	Arabidopsis thaliana (Mouse-ear cress)	3702
High	Master Protein	GLYMA_06G118000	PF10664 - Cyanobacterial and plastid NDH-1 subunit M (NdhM) (1 of 2)	0	30.318	12	2	8	1	218	25.3	5.71	21.18	2	2	0.653	0.596219	27.27	143.6	56.4	2.32	51.41	High	High	Not Found	Not Found	Not Found	Not Found	1		2	0	Only Control	1	GLYMA_06G118000	GLYMA_06G118000	sp|Q2V2S7|NDHM_ARATH	NAD(P)H-quinone oxidoreductase subunit M, chloroplastic GN=ndhM	ident:134/218 pos:164/218 query:218 hit:217 align:212 bit:270.8	OK	NAD(P)H-quinone oxidoreductase subunit M, chloroplastic	NAD(P)H dehydrogenase subunit M (NDH subunit M; NDH-M); NADH-plastoquinone oxidoreductase subunit M	NDHM_ARATH	Q2V2S7	Q0WUL4; Q9SZJ4	ndhM	na	Arabidopsis thaliana (Mouse-ear cress)	3702
High	Master Protein	GLYMA_13G237000	PF05564 - Dormancy/auxin associated protein (Auxin_repressed) (1 of 8)	0	30.317	23	1	6	1	117	12.9	9.76	32.22	1	0	1.289	0.762273	26.45	101.3	98.7	2.84	40.51	High	High	Not Found	High	High	Peak Found	1		2	3	Present Both	1	GLYMA_13G237000	GLYMA_13G237000	sp|Q9FKV8|DRMH2_ARATH	Dormancy-associated protein homolog 2 GN=DRMH2	ident:69/117 pos:84/117 query:117 hit:114 align:123 bit:127.9	OK	Dormancy-associated protein homolog 2	DRM1 homolog 2; Dormancy/auxin associated family protein	DRMH2_ARATH	Q9FKV8	Q8L9R9	DRMH2	na	Arabidopsis thaliana (Mouse-ear cress)	3702
High	Master Protein	GLYMA_14G004200	PTHR32382:SF4 - FASCICLIN-LIKE ARABINOGALACTAN PROTEIN 1 (1 of 6)	0	30.311	11	4	8	4	443	47.9	7.74	26.2	4	0	2.17	0.408689	20.29	90.5	109.5	13.84		High	Peak Found	High	Not Found	Peak Found	High	1		3	2	Present Both	1	GLYMA_14G004200	GLYMA_14G004200	sp|Q9SU13|FLA2_ARATH	Fasciclin-like arabinogalactan protein 2 GN=FLA2	ident:219/443 pos:287/443 query:443 hit:403 align:389 bit:438.0	Poor_match	Fasciclin-like arabinogalactan protein 2	na	FLA2_ARATH	Q9SU13	Q8L9T2; Q9C5Q6	FLA2	na	Arabidopsis thaliana (Mouse-ear cress)	3702
High	Master Protein	GLYMA_08G113000	K11594 - ATP-dependent RNA helicase DDX3X (DDX3X, bel) (1 of 8)	0	30.248	6	2	4	2	619	66.7	7.87	16.94	2	0	1.072	0.999087	9.09	96.5	103.5	8.66		High	High	Not Found	High	Not Found	Not Found	1		2	1	Only Control	1	GLYMA_08G113000	GLYMA_08G113000	sp|Q84W89|RH37_ARATH	DEAD-box ATP-dependent RNA helicase 37 GN=RH37	ident:463/619 pos:504/619 query:619 hit:633 align:588 bit:882.9	OK	DEAD-box ATP-dependent RNA helicase 37	na	RH37_ARATH	Q84W89	Q9SIN6	RH37	na	Arabidopsis thaliana (Mouse-ear cress)	3702
High	Master Protein	GLYMA_03G216600	K02885 - large subunit ribosomal protein L19e (RP-L19e, RPL19) (1 of 8)	0	30.186	18	3	8	2	212	24.6	11.44	21.22	3	1	1.311	0.858984	30.93	95.1	104.9	25.37	20.82	High	High	Not Found	High	Peak Found	High	1		2	3	Present Both	1	GLYMA_03G216600	GLYMA_03G216600	sp|Q9LUQ6|RL192_ARATH	60S ribosomal protein L19-2 GN=RPL19B	ident:179/212 pos:188/212 query:212 hit:209 align:212 bit:359.0	OK	60S ribosomal protein L19-2	na	RL192_ARATH	Q9LUQ6	na	RPL19B	na	Arabidopsis thaliana (Mouse-ear cress)	3702
High	Master Protein	GLYMA_14G025600	PTHR11430 - LIPOCALIN (1 of 3)	0	29.865	15	6	14	2	330	36.8	6.25	34.71	6	3	0.772	0.800337	21.82	116.5	83.5	25.86	22.62	Peak Found	High	High	Peak Found	Peak Found	High	1		3	3	Present Both	1	GLYMA_14G025600	GLYMA_14G025600	sp|Q9STS7|CHL_ARATH	Chloroplastic lipocalin GN=CHL	ident:218/330 pos:259/330 query:330 hit:353 align:324 bit:432.6	OK	Chloroplastic lipocalin (AtCHL)	na	CHL_ARATH	Q9STS7	na	CHL	na	Arabidopsis thaliana (Mouse-ear cress)	3702
High	Master Protein	GLYMA_16G126200	K02731 - 20S proteasome subunit alpha 4 (PSMA7) (1 of 3)	0	29.855	23	3	9	3	249	27.2	7.44	35.11	3	0	0.986	0.999087	54.83	135.4	64.6	10.44	41.57	High	High	High	High	Peak Found	Peak Found	1		3	3	Present Both	1	GLYMA_16G126200	GLYMA_16G126200	sp|O24616|PSA7B_ARATH	Proteasome subunit alpha type-7-B GN=PAD2	ident:230/249 pos:242/249 query:249 hit:250 align:250 bit:445.3	OK	Proteasome subunit alpha type-7-B	20S proteasome alpha subunit D-2; Proteasome component 6B; Proteasome component 6C; Proteasome subunit alpha type-4	PSA7B_ARATH	O24616	Q0WTK1; Q84W05	PAD2	PRC6B; PRC6C; PRS1	Arabidopsis thaliana (Mouse-ear cress)	3702
High	Master Protein	GLYMA_15G052400	K08917 - light-harvesting complex II chlorophyll a/b binding protein 6 (LHCB6) (1 of 3)	0	29.846	30	4	12	3	260	27.6	6.6	44.65	4	0	0.625	0.490887	18.07	139	61	52.92	47.09	High	High	High	High	High	High	1		3	3	Present Both	1	GLYMA_15G052400	GLYMA_15G052400	sp|Q9C639|LHCA5_ARATH	Photosystem I chlorophyll a/b-binding protein 5, chloroplastic GN=LHCA5	ident:94/260 pos:128/260 query:260 hit:256 align:248 bit:136.3	Poor_match	Photosystem I chlorophyll a/b-binding protein 5, chloroplastic (Lhca5)	LHCI type III LHCA5	LHCA5_ARATH	Q9C639	B9DFW4; Q8L9Y7; Q9XF85	LHCA5	na	Arabidopsis thaliana (Mouse-ear cress)	3702
High	Master Protein	GLYMA_09G059600		0	29.703	56	8	20	4	89	10.5	9.35	41.95	8	3	1.235	0.797967	41.94	89.6	110.4	40.09	47.5	High	High	High	High	High	High	1		3	3	Present Both	1	GLYMA_09G059600	GLYMA_09G059600	sp|Q9FXH5|PUP14_ARATH	Purine permease 14 GN=PUP14	ident:15/89 pos:21/89 query:89 hit:393 align:36 bit:28.5	Partial_match_both	Purine permease 14 (AtPUP14)	na	PUP14_ARATH	Q9FXH5	na	PUP14	na	Arabidopsis thaliana (Mouse-ear cress)	3702
High	Master Protein	GLYMA_20G152100	PTHR31718:SF8 - EMBRYO-SPECIFIC PROTEIN 3 (1 of 5)	0	29.614	16	2	15	2	190	21.1	6.02	50.95	2	0	1.232	0.800337	68.26	106.6	93.4	57.83	32.34	High	High	High	High	High	High	1		3	3	Present Both	1	GLYMA_20G152100	GLYMA_20G152100	sp|Q6NPM5|ATS3B_ARATH	Embryo-specific protein ATS3B GN=ATS3B	ident:108/190 pos:136/190 query:190 hit:190 align:187 bit:218.0	OK	Embryo-specific protein ATS3B	Protein ARABIDOPSIS THALIANA SEED 3B	ATS3B_ARATH	Q6NPM5	Q680D1; Q9LVB6	ATS3B	na	Arabidopsis thaliana (Mouse-ear cress)	3702
High	Master Protein	GLYMA_06G204200	PF06549 - Protein of unknown function (DUF1118) (DUF1118) (1 of 4)	0	29.534	15	4	18	4	214	22.7	9.72	48.57	4	0	0.6	0.425893	25.25	137.8	62.2	13	32.34	High	High	High	High	Peak Found	High	1		3	3	Present Both	1	GLYMA_06G204200	GLYMA_06G204200	sp|Q9FLW9|PKP2_ARATH	Plastidial pyruvate kinase 2 GN=PKP2	ident:11/214 pos:21/214 query:214 hit:579 align:34 bit:29.3	Partial_match_both	Plastidial pyruvate kinase 2 (PKp2)	Plastidial pyruvate kinase 1 (PKP1); Pyruvate kinase III; Pyruvate kinase isozyme B1, chloroplastic (PKP-BETA1; Plastidic pyruvate kinase beta subunit 1)	PKP2_ARATH	Q9FLW9	Q56XD5; Q56ZT8; Q570A3; Q94AG4	PKP2	PKP1	Arabidopsis thaliana (Mouse-ear cress)	3702
High	Master Protein	GLYMA_05G157800	PTHR24089:SF266 - MITOCHONDRIAL DICARBOXYLATE/TRICARBOXYLATE TRANSPORTER DTC (1 of 2)	0	29.509	17	6	16	6	301	32	9.41	35.55	6	0	1.151	0.906801	51.13	116.2	83.8	106.78	103.67	High	High	High	Peak Found	Peak Found	High	1		3	3	Present Both	1	GLYMA_05G157800	GLYMA_05G157800	sp|Q9C5M0|DTC_ARATH	Mitochondrial dicarboxylate/tricarboxylate transporter DTC GN=DTC	ident:252/301 pos:272/301 query:301 hit:298 align:301 bit:527.3	OK	Mitochondrial dicarboxylate/tricarboxylate transporter DTC	Dicarboxylate/tricarboxylate carrier	DTC_ARATH	Q9C5M0	Q8SFL2	DTC	na	Arabidopsis thaliana (Mouse-ear cress)	3702
High	Master Protein	GLYMA_02G147000	K02838 - ribosome recycling factor (frr, MRRF, RRF) (1 of 2)	0	29.492	26	5	16	5	261	29	9.57	39.26	5	0	1.142	0.912241	44.62	90.1	109.9	30.59	70.7	High	High	High	High	High	High	1		3	3	Present Both	1	GLYMA_02G147000	GLYMA_02G147000	sp|Q9M1X0|RRFC_ARATH	Ribosome-recycling factor, chloroplastic GN=RRF	ident:176/261 pos:216/261 query:261 hit:275 align:275 bit:333.2	OK	Ribosome-recycling factor, chloroplastic (RRF)	CpFrr; RRFHCP; Ribosome-releasing factor, chloroplastic	RRFC_ARATH	Q9M1X0	Q93V42	RRF	na	Arabidopsis thaliana (Mouse-ear cress)	3702
High	Master Protein	GLYMA_17G037700	K02945 - small subunit ribosomal protein S1 (RP-S1, rpsA) (1 of 6)	0	29.491	13	5	13	5	412	45	5.24	37.04	5	0	0.718	0.712101	20.53	149.3	50.7	17.85	15.9	High	High	High	Peak Found	Peak Found	High	1		3	3	Present Both	1	GLYMA_17G037700	GLYMA_17G037700	sp|Q93VC7|RPS1_ARATH	30S ribosomal protein S1, chloroplastic GN=RPS1	ident:306/412 pos:363/412 query:412 hit:416 align:413 bit:616.7	OK	30S ribosomal protein S1, chloroplastic	Plastid ribosomal protein S1 (PRPS1)	RPS1_ARATH	Q93VC7	na	RPS1	na	Arabidopsis thaliana (Mouse-ear cress)	3702
High	Master Protein	GLYMA_09G026100	PTHR11588:SF97 - TUBULIN BETA-4 CHAIN-RELATED (1 of 6)	0	29.475	15	6	14	4	446	50.1	4.87	40.91	6	2	0.787	0.838691	35.28	145.8	54.2	53.63	46.75	High	High	Peak Found	High	Peak Found	High	1		3	3	Present Both	1	GLYMA_09G026100	GLYMA_09G026100	sp|P29516|TBB8_ARATH	Tubulin beta-8 chain GN=TUBB8	ident:414/446 pos:424/446 query:446 hit:449 align:430 bit:852.8	OK	Tubulin beta-8 chain	Beta-8-tubulin	TBB8_ARATH	P29516	Q93Y15; Q9FF94	TUBB8	TUB8	Arabidopsis thaliana (Mouse-ear cress)	3702
High	Master Protein	GLYMA_20G017300	K17795 - mitochondrial import inner membrane translocase subunit TIM17 (TIM17) (1 of 3)	0	29.401	10	1	5	1	213	22.1	5.15	29.52	1	0	2.146	0.507379	90.69	63.6	136.4	21.85	111.24	High	High	Not Found	High	High	Peak Found	1		2	3	Present Both	1	GLYMA_20G017300	GLYMA_20G017300	sp|Q9SP35|TI172_ARATH	Mitochondrial import inner membrane translocase subunit TIM17-2 GN=TIM17-2	ident:147/213 pos:173/213 query:213 hit:243 align:248 bit:266.9	OK	Mitochondrial import inner membrane translocase subunit TIM17-2	na	TI172_ARATH	Q9SP35	Q9ZUS5	TIM17-2	na	Arabidopsis thaliana (Mouse-ear cress)	3702
High	Master Protein	GLYMA_17G072500	PTHR23253//PTHR23253:SF32 - EUKARYOTIC TRANSLATION INITIATION FACTOR 4 GAMMA // SUBFAMILY NOT NAMED (1 of 4)	0	29.381	11	6	18	2	789	86.8	7.59	45.04	6	0	1.837	0.60931	93.5	70.5	129.5	15.02	67.26	High	Peak Found	Peak Found	High	High	High	1		3	3	Present Both	1	GLYMA_17G072500	GLYMA_17G072500	sp|Q93ZT6|IF4G1_ARATH	Eukaryotic translation initiation factor isoform 4G-1 GN=EIF(ISO)4G1	ident:524/789 pos:638/789 query:789 hit:780 align:798 bit:1006.5	OK	Eukaryotic translation initiation factor isoform 4G-1 (eIF(iso)4G-1)	na	IF4G1_ARATH	Q93ZT6	F4KDF4; Q8H0T8; Q8H179; Q9FJM7	EIF(ISO)4G1	na	Arabidopsis thaliana (Mouse-ear cress)	3702
High	Master Protein	GLYMA_16G050800	K13250 - translocon-associated protein subunit beta (SSR2) (1 of 2)	0	29.246	15	3	11	3	194	20.9	9.36	30.6	3	0	1.07	0.963822	41.13	101.6	98.4	16.3	38.79	High	High	High	High	Peak Found	High	1		3	3	Present Both	1	GLYMA_16G050800	GLYMA_16G050800	sp|P46573|PBL10_ARATH	Probable serine/threonine-protein kinase PBL10 GN=PBL10	ident:19/194 pos:26/194 query:194 hit:412 align:48 bit:28.5	Partial_match_both	Probable serine/threonine-protein kinase PBL10	PBS1-like protein 10; Protein kinase 1B	PBL10_ARATH	P46573	Q7GAG3; Q9SLH5	PBL10	na	Arabidopsis thaliana (Mouse-ear cress)	3702
High	Master Protein	GLYMA_06G157100	K11097 - small nuclear ribonucleoprotein E (SNRPE, SME) (1 of 4)	0	28.994	55	3	8	3	88	10.3	9.99	28.6	3	0	2.393	0.297496	34.89	57.1	142.9	10.32	36.03	High	High	Not Found	High	High	Not Found	1		2	2	Present Both	1	GLYMA_06G157100	GLYMA_06G157100	sp|Q9FKB0|LSM5_ARATH	Sm-like protein LSM5 GN=LSM5	ident:28/88 pos:44/88 query:88 hit:88 align:78 bit:47.4	Poor_match	Sm-like protein LSM5 (AtLSM5)	Protein SUPERSENSITIVE TO ABA AND DROUGHT 1 (AtSAD1); U6 snRNA-associated Sm-like protein LSM5	LSM5_ARATH	Q9FKB0	Q0WMZ9	LSM5	na	Arabidopsis thaliana (Mouse-ear cress)	3702
High	Master Protein	GLYMA_05G246900	PF11460 - Protein of unknown function (DUF3007) (DUF3007) (1 of 2)	0	28.788	11	1	3	1	205	22.6	8.66	17.98	1	0	0.25	0.00200459	1.12	160	40	16.9		High	Peak Found	High	Peak Found	Not Found	Not Found	1		3	1	Only Control	1	GLYMA_05G246900	GLYMA_05G246900	sp|Q9M012|PR1B5_ARATH	PRA1 family protein B5 GN=PRA1B5	ident:11/205 pos:22/205 query:205 hit:223 align:37 bit:28.5	Partial_match_both	PRA1 family protein B5 (AtPRA1.B5)	na	PR1B5_ARATH	Q9M012	na	PRA1B5	na	Arabidopsis thaliana (Mouse-ear cress)	3702
High	Master Protein	GLYMA_03G258500		0	28.771	29	2	10	2	63	6.8	8.92	35.58	2	0	1.139	0.956929	63.84	117.9	82.1	54.47	115.01	High	High	High	Peak Found	Peak Found	High	1		3	3	Present Both	1	GLYMA_03G258500	GLYMA_03G258500	sp|F4JD14|BCHC1_ARATH	BEACH domain-containing protein C1 GN=BCHC1	ident:11/63 pos:13/63 query:63 hit:1941 align:26 bit:25.4	Partial_match_both	BEACH domain-containing protein C1	BEACH-domain homolog C1	BCHC1_ARATH	F4JD14	Q9LEX9	BCHC1	na	Arabidopsis thaliana (Mouse-ear cress)	3702
High	Master Protein	GLYMA_10G005500	K03942 - NADH dehydrogenase (ubiquinone) flavoprotein 1 (NDUFV1) (1 of 2)	0	28.632	13	6	16	1	482	52.8	7.8	38.57	6	0	0.01	1.22204e-16		200		21.9		High	High	Not Found	Not Found	Not Found	Not Found	1		2	0	Only Control	1	GLYMA_10G005500	GLYMA_10G005500	sp|Q9FNN5|NDUV1_ARATH	NADH dehydrogenase [ubiquinone] flavoprotein 1, mitochondrial GN=NPR3	ident:439/482 pos:463/482 query:482 hit:486 align:481 bit:859.8	OK	NADH dehydrogenase [ubiquinone] flavoprotein 1, mitochondrial	na	NDUV1_ARATH	Q9FNN5	Q8LAL7	OrderedLocusNames=At5g08530	na	Arabidopsis thaliana (Mouse-ear cress)	3702
High	Master Protein	GLYMA_09G136800		0	28.601	7	3	8	3	882	96.9	4.83	33.13	3	0	1.095	0.967807	16.93	108.4	91.6	31	57.7	High	High	Peak Found	High	Peak Found	High	1		3	3	Present Both	1	GLYMA_09G136800	GLYMA_09G136800	sp|Q9FLH0|CRWN4_ARATH	Protein CROWDED NUCLEI 4 GN=CRWN4	ident:35/882 pos:53/882 query:882 hit:1010 align:98 bit:38.1	Partial_match_both	Protein CROWDED NUCLEI 4	Protein LITTLE NUCLEI 4	CRWN4_ARATH	Q9FLH0	F4JXK1; O49539	CRWN4	na	Arabidopsis thaliana (Mouse-ear cress)	3702
High	Master Protein	GLYMA_02G003300	K03942 - NADH dehydrogenase (ubiquinone) flavoprotein 1 (NDUFV1) (1 of 2)	0	28.479	13	6	15	1	482	52.9	8.05	36.9	6	4	0.994	0.999087	63.62	101.2	98.8	3.04	23.01	High	Peak Found	Peak Found	Peak Found	Peak Found	Not Found	1		3	2	Present Both	1	GLYMA_02G003300	GLYMA_02G003300	sp|Q9FNN5|NDUV1_ARATH	NADH dehydrogenase [ubiquinone] flavoprotein 1, mitochondrial GN=NPR3	ident:438/482 pos:463/482 query:482 hit:486 align:481 bit:857.8	OK	NADH dehydrogenase [ubiquinone] flavoprotein 1, mitochondrial	na	NDUV1_ARATH	Q9FNN5	Q8LAL7	OrderedLocusNames=At5g08530	na	Arabidopsis thaliana (Mouse-ear cress)	3702
High	Master Protein	GLYMA_16G050200	K02148 - V-type H+-transporting ATPase subunit C (ATPeV1C, ATP6C) (1 of 4)	0	28.297	17	5	18	2	384	43.7	6.15	55.67	5	0	1.132	0.976258	41.28	81.7	118.3	35.89	20.7	High	High	High	High	Peak Found	High	1		3	3	Present Both	1	GLYMA_16G050200	GLYMA_16G050200	sp|Q9SDS7|VATC_ARATH	V-type proton ATPase subunit C GN=VHA-C	ident:310/384 pos:344/384 query:384 hit:375 align:376 bit:656.8	OK	V-type proton ATPase subunit C (V-ATPase subunit C)	Vacuolar H(+)-ATPase subunit C; Vacuolar proton pump subunit C	VATC_ARATH	Q9SDS7	na	VHA-C	DET3; VATC	Arabidopsis thaliana (Mouse-ear cress)	3702
High	Master Protein	GLYMA_19G125500	K03626 - nascent polypeptide-associated complex subunit alpha (EGD2, NACA) (1 of 8)	0	28.227	20	4	8	2	205	22.4	4.63	27.67	4	1	1.204	0.897464	47.65	109.3	90.7	74.77	21.11	High	High	Peak Found	High	Peak Found	Not Found	1		3	2	Present Both	1	GLYMA_19G125500	GLYMA_19G125500	sp|Q9LHG9|NACA1_ARATH	Nascent polypeptide-associated complex subunit alpha-like protein 1 GN=NAC030	ident:156/205 pos:175/205 query:205 hit:203 align:202 bit:240.7	OK	Nascent polypeptide-associated complex subunit alpha-like protein 1 (NAC-alpha-like protein 1)	Alpha-NAC-like protein 1	NACA1_ARATH	Q9LHG9	na	OrderedLocusNames=At3g12390	na	Arabidopsis thaliana (Mouse-ear cress)	3702
High	Master Protein	GLYMA_11G246700	PTHR11804//PTHR11804:SF42 - PROTEASE M3 THIMET OLIGOPEPTIDASE-RELATED // SUBFAMILY NOT NAMED (1 of 1)	0	28.125	21	3	6	3	239	27.2	9.55	24.93	3	0	1.037	0.974214	38.9	142.9	57.1	18.28	107.7	High	High	Not Found	High	Peak Found	Peak Found	1		2	3	Present Both	1	GLYMA_11G246700	GLYMA_11G246700	sp|Q8LDL0|HHL1_ARATH	Protein HHL1, chloroplastic GN=HHL1	ident:175/239 pos:201/239 query:239 hit:231 align:237 bit:355.5	OK	Protein HHL1, chloroplastic	Hypersensitive to high light 1	HHL1_ARATH	Q8LDL0	F4HTQ4; Q94A67	HHL1	na	Arabidopsis thaliana (Mouse-ear cress)	3702
High	Master Protein	GLYMA_08G006500	K08054 - calnexin (CANX) (1 of 3)	0	28.048	7	4	17	3	538	61.6	4.94	40.47	4	0	0.624	0.465155	17.24	123.2	76.8	61.23	20.22	High	High	High	High	High	High	1		3	3	Present Both	1	GLYMA_08G006500	GLYMA_08G006500	sp|P29402|CALX1_ARATH	Calnexin homolog 1 GN=CNX1	ident:397/538 pos:455/538 query:538 hit:530 align:536 bit:787.3	OK	Calnexin homolog 1	na	CALX1_ARATH	P29402	na	CNX1	na	Arabidopsis thaliana (Mouse-ear cress)	3702
High	Master Protein	GLYMA_01G200000		0	27.965	18	1	9	1	127	14.1	8.35	51.16	1	0	1.284	0.921221	81.71	87.6	112.4	12.07	117.41	High	High	Not Found	High	High	High	1		2	3	Present Both	1	GLYMA_01G200000	GLYMA_01G200000	sp|Q8L8Q8|Y5486_ARATH	Uncharacterized protein At5g64816 GN=CBSDUF5	ident:100/127 pos:115/127 query:127 hit:130 align:120 bit:219.9	OK	Uncharacterized protein At5g64816	na	Y5486_ARATH	Q8L8Q8	Q9LV96	OrderedLocusNames=At5g64816	na	Arabidopsis thaliana (Mouse-ear cress)	3702
High	Master Protein	GLYMA_16G204100	PTHR11638//PTHR11638:SF105 - ATP-DEPENDENT CLP PROTEASE // SUBFAMILY NOT NAMED (1 of 5)	0	27.958	28	6	19	1	260	28.3	8.76	45.3	6	5	1.131	0.92428	58.72	100.5	99.5	26.95	33.94	High	High	High	High	Peak Found	High	1		3	3	Present Both	1	GLYMA_16G204100	GLYMA_16G204100	sp|Q93WL3|CLPT1_ARATH	ATP-dependent Clp protease ATP-binding subunit CLPT1, chloroplastic GN=CLPT1	ident:141/260 pos:182/260 query:260 hit:238 align:246 bit:265.8	OK	ATP-dependent Clp protease ATP-binding subunit CLPT1, chloroplastic	nClpC-like protein	CLPT1_ARATH	Q93WL3	Q9STK0	CLPT1	na	Arabidopsis thaliana (Mouse-ear cress)	3702
High	Master Protein	GLYMA_14G084500	K13126 - polyadenylate-binding protein (PABPC) (1 of 14)	0	27.774	14	5	8	1	652	71.7	7.78	28.74	5	0	0.947	0.940311	10.83	102.7	97.3	114.62		Peak Found	Peak Found	Peak Found	High	Not Found	Not Found	1		3	1	Only Control	1	GLYMA_14G084500	GLYMA_14G084500	sp|P42731|PABP2_ARATH	Polyadenylate-binding protein 2 GN=PAB2	ident:440/652 pos:523/652 query:652 hit:629 align:655 bit:857.1	OK	Polyadenylate-binding protein 2 (PABP-2; Poly(A)-binding protein 2)	na	PABP2_ARATH	P42731	Q8RXR5	PAB2	na	Arabidopsis thaliana (Mouse-ear cress)	3702
High	Master Protein	GLYMA_08G052600	PTHR11467//PTHR11467:SF33 - HISTONE H1/H5 // SUBFAMILY NOT NAMED (1 of 7)	0	27.72	15	6	11	6	413	44.2	10.92	23.23	6	0	0.88	0.957425	34.78	126.8	73.2	35.42	41.23	High	High	High	High	High	High	1		3	3	Present Both	1	GLYMA_08G052600	GLYMA_08G052600	sp|Q43386|HMGYA_ARATH	HMG-Y-related protein A GN=HMGA	ident:41/413 pos:61/413 query:413 hit:204 align:94 bit:82.4	Partial_match_both	HMG-Y-related protein A (AtHMGA)	High mobility group A protein	HMGYA_ARATH	Q43386	P92954; Q8LGC1	HMGA	na	Arabidopsis thaliana (Mouse-ear cress)	3702
High	Master Protein	GLYMA_12G151400	PTHR10438//PTHR10438:SF285 - THIOREDOXIN // SUBFAMILY NOT NAMED (1 of 3)	0	27.68	25	4	18	1	175	18.9	9.04	38.48	4	2	0.939	0.976258	35.44	109.1	90.9	5.13	39.94	High	High	High	High	High	High	1		3	3	Present Both	1	GLYMA_12G151400	GLYMA_12G151400	sp|Q9SEU6|TRXM4_ARATH	Thioredoxin M4, chloroplastic GN=NTRC	ident:88/175 pos:108/175 query:175 hit:193 align:133 bit:191.0	Poor_match	Thioredoxin M4, chloroplastic (AtTrxm4)	na	TRXM4_ARATH	Q9SEU6	Q0WUS9; Q9LDP6	OrderedLocusNames=At3g15360	na	Arabidopsis thaliana (Mouse-ear cress)	3702
High	Master Protein	GLYMA_13G318100		0	27.585	27	5	14	2	159	17.9	5.27	49.36	5	2	0.823	0.897464	31.48	112.5	87.5	68.77	40.88	High	High	High	High	Not Found	High	1		3	2	Present Both	1	GLYMA_13G318100	GLYMA_13G318100	sp|Q39168|U540A_ARATH	UPF0540 protein At1g62000 GN=UTR2	ident:16/159 pos:24/159 query:159 hit:148 align:46 bit:28.9	Partial_match_both	UPF0540 protein At1g62000	na	U540A_ARATH	Q39168	na	OrderedLocusNames=At1g62000	na	Arabidopsis thaliana (Mouse-ear cress)	3702
High	Master Protein	GLYMA_06G131300	PTHR14136:SF11 - THYLAKOID LUMENAL 17.4 KDA PROTEIN, CHLOROPLASTIC (1 of 2)	0	27.418	31	5	10	5	239	25.6	7.53	26.63	5	0	1.24	0.921221	99.16	107.9	92.1	107.62	140.88	High	High	High	Peak Found	Peak Found	High	1		3	3	Present Both	1	GLYMA_06G131300	GLYMA_06G131300	sp|P81760|TL17_ARATH	Thylakoid lumenal 17.4 kDa protein, chloroplastic GN=TL17	ident:147/239 pos:182/239 query:239 hit:236 align:242 bit:291.6	OK	Thylakoid lumenal 17.4 kDa protein, chloroplastic	P17.4	TL17_ARATH	P81760	Q3E8C0; Q93Y82	TL17	na	Arabidopsis thaliana (Mouse-ear cress)	3702
High	Master Protein	GLYMA_15G102600	K02957 - small subunit ribosomal protein S15Ae (RP-S15Ae, RPS15A) (1 of 8)	0	27.395	17	3	7	3	260	29.7	9.23	24.04	3	0	0.797	0.852529	43.5	100.8	99.2	9.9	63.8	High	High	Not Found	High	Peak Found	Peak Found	1		2	3	Present Both	1	GLYMA_15G102600	GLYMA_15G102600	sp|P42798|R15A1_ARATH	40S ribosomal protein S15a-1 GN=RPS15AF	ident:118/260 pos:121/260 query:260 hit:130 align:121 bit:247.3	Partial_match_query	40S ribosomal protein S15a-1	na	R15A1_ARATH	P42798	Q7GD83	RPS15AA	na	Arabidopsis thaliana (Mouse-ear cress)	3702
High	Master Protein	GLYMA_15G026100	K03257 - translation initiation factor 4A (EIF4A) (1 of 11)	0	27.324	18	4	12	2	413	46.6	5.55	42.15	4	2	0.752	0.740874	29.11	123	77	13.33	52.85	High	Peak Found	High	Not Found	Peak Found	Not Found	1		3	1	Only Control	1	GLYMA_15G026100	GLYMA_15G026100	sp|P41377|IF4A2_ARATH	Eukaryotic initiation factor 4A-2 GN=TIF4A-2	ident:385/413 pos:399/413 query:413 hit:412 align:414 bit:790.0	OK	Eukaryotic initiation factor 4A-2 (eIF-4A-2)	ATP-dependent RNA helicase eIF4A-2; DEAD-box ATP-dependent RNA helicase 19	IF4A2_ARATH	P41377	Q0WWK5	TIF4A-2	RH19	Arabidopsis thaliana (Mouse-ear cress)	3702
High	Master Protein	GLYMA_01G140600	K06110 - exocyst complex component 3 (EXOC3, SEC6L1) (1 of 4)	0	27.304	5	3	8	3	757	86.1	4.89	23.9	3	0	0.745	0.740874	7.2	136.4	63.6	6.7	34.81	High	High	Not Found	High	Peak Found	High	1	Acetyl [N-Term]	2	3	Present Both	1	GLYMA_01G140600	GLYMA_01G140600	sp|Q94AI6|SEC6_ARATH	Exocyst complex component SEC6 GN=SEC6	ident:672/757 pos:717/757 query:757 hit:752 align:757 bit:1371.3	OK	Exocyst complex component SEC6 (AtSec6)	na	SEC6_ARATH	Q94AI6	Q8RVQ6; Q9M9G4	SEC6	na	Arabidopsis thaliana (Mouse-ear cress)	3702
High	Master Protein	GLYMA_08G341600	PTHR33107:SF5 - KUNITZ FAMILY TRYPSIN AND PROTEASE INHIBITOR PROTEIN-RELATED (1 of 22)	0	27.104	24	6	14	5	217	24.1	6.16	31.59	6	1	0.978	0.999087	89.1	79.9	120.1	81.72	63.76	High	High	High	High	Peak Found	High	1		3	3	Present Both	1	GLYMA_08G341600	GLYMA_08G341600	sp|Q9LMU2|KTI2_ARATH	Kunitz trypsin inhibitor 2 GN=KTI2	ident:57/217 pos:80/217 query:217 hit:196 align:190 bit:63.5	Poor_match	Kunitz trypsin inhibitor 2 (AtKTI2)	na	KTI2_ARATH	Q9LMU2	na	KTI2	na	Arabidopsis thaliana (Mouse-ear cress)	3702
High	Master Protein	GLYMA_11G124900	PTHR10516:SF264 - FK506-BINDING PROTEIN 1 (1 of 2)	0	27.009	26	4	10	4	232	24.6	6.7	20.07	4	0	1.087	0.974214	126.94	122.3	77.7	117.98	135.06	High	High	High	Peak Found	Peak Found	High	1		3	3	Present Both	1	GLYMA_11G124900	GLYMA_11G124900	sp|O22870|FK163_ARATH	Peptidyl-prolyl cis-trans isomerase FKBP16-3, chloroplastic GN=FKBP16-3	ident:158/232 pos:180/232 query:232 hit:223 align:228 bit:299.3	OK	Peptidyl-prolyl cis-trans isomerase FKBP16-3, chloroplastic (PPIase FKBP16-3)	FK506-binding protein 16-3 (AtFKBP16-3); Immunophilin FKBP16-3; Rotamase	FK163_ARATH	O22870	Q940C0	FKBP16-3	FKBP17	Arabidopsis thaliana (Mouse-ear cress)	3702
High	Master Protein	GLYMA_19G235000	PTHR10992:SF773 - PROTEIN AUXIN RESPONSE 4 (1 of 2)	0	26.997	5	3	8	3	480	53	6.79	26.13	3	0	0.921	0.963822	31.23	144.7	55.3	11.67	42.65	High	High	Not Found	High	Not Found	High	1		2	2	Present Both	1	GLYMA_19G235000	GLYMA_19G235000	sp|Q9FZ33|AXR4_ARATH	Protein AUXIN RESPONSE 4 GN=AXR4	ident:252/480 pos:331/480 query:480 hit:473 align:487 bit:464.5	OK	Protein AUXIN RESPONSE 4	na	AXR4_ARATH	Q9FZ33	Q944Q7	AXR4	na	Arabidopsis thaliana (Mouse-ear cress)	3702
High	Master Protein	GLYMA_01G154200	PTHR13844 - BRG-1 ASSOCIATED FACTOR 60 BAF60 (1 of 20)	0	26.985	20	2	6	2	132	13.9	10.17	21.84	2	0	2.098	0.160987	31.56	52	148	54.78	13.57	High	High	Peak Found	High	High	Not Found	1		3	2	Present Both	1	GLYMA_01G154200	GLYMA_01G154200	sp|Q9FMT4|SNF12_ARATH	SWI/SNF complex component SNF12 homolog GN=ASNAP1	ident:30/132 pos:54/132 query:132 hit:534 align:105 bit:50.4	Partial_match_hit	SWI/SNF complex component SNF12 homolog	na	SNF12_ARATH	Q9FMT4	na	OrderedLocusNames=At5g14170	na	Arabidopsis thaliana (Mouse-ear cress)	3702
High	Master Protein	GLYMA_18G001800	PTHR34209:SF1 - RHODANESE/CELL CYCLE CONTROL PHOSPHATASE SUPERFAMILY PROTEIN (1 of 2)	0	26.94	6	2	8	1	650	70.4	5.25	30.53	2	0	1.144	0.974214	15.66	93.3	106.7	28.58		High	High	Peak Found	Not Found	Not Found	High	1		3	1	Only Control	1	GLYMA_18G001800	GLYMA_18G001800	sp|Q9FN48|CAS_ARATH	Calcium sensing receptor, chloroplastic GN=CAS	ident:57/650 pos:100/650 query:650 hit:387 align:200 bit:89.0	Partial_match_both	Calcium sensing receptor, chloroplastic	Sulfurtransferase 3 (AtStr3)	CAS_ARATH	Q9FN48	na	CAS	STR3	Arabidopsis thaliana (Mouse-ear cress)	3702
High	Master Protein	GLYMA_03G023900	PF07386 - Protein of unknown function (DUF1499) (DUF1499) (1 of 5)	0	26.909	19	3	13	3	236	26.8	8.84	37.12	3	0	0.836	0.919456	34.34	105.3	94.7	30.52	36.01	High	High	High	High	High	High	1		3	3	Present Both	1	GLYMA_03G023900	GLYMA_03G023900	sp|Q9CAN9|ERF26_ARATH	Ethylene-responsive transcription factor ERF026 GN=ERF026	ident:12/236 pos:20/236 query:236 hit:248 align:32 bit:28.5	Partial_match_both	Ethylene-responsive transcription factor ERF026	na	ERF26_ARATH	Q9CAN9	Q9LQ01	ERF026	na	Arabidopsis thaliana (Mouse-ear cress)	3702
High	Master Protein	GLYMA_05G166300	PTHR10903:SF39 - TRANSLOCASE OF CHLOROPLAST 159, CHLOROPLASTIC (1 of 3)	0	26.727	4	3	9	1	1240	133.3	4.61	28.37	3	1	0.585	0.364837	17.44	136.7	63.3	45.1	30.48	High	High	High	High	High	High	1		3	3	Present Both	1	GLYMA_05G166300	GLYMA_05G166300	sp|O81283|TC159_ARATH	Translocase of chloroplast 159, chloroplastic GN=TOC159	ident:609/1240 pos:737/1240 query:1240 hit:1503 align:890 bit:1218.8	Poor_match	Translocase of chloroplast 159, chloroplastic (AtToc159)	159 kDa chloroplast outer envelope protein; Plastid protein import 2; Translocase of chloroplast 160, chloroplastic (AtToc160); Translocase of chloroplast 86, chloroplastic (AtToc86)	TC159_ARATH	O81283	O22774; Q56W83; Q945M4	TOC159	PPI2; TOC160; TOC86	Arabidopsis thaliana (Mouse-ear cress)	3702
High	Master Protein	GLYMA_19G185800	PTHR36737:SF1 - EXPRESSED PROTEIN (1 of 2)	0	26.621	41	4	14	4	124	13.6	8.19	41.73	4	0	1.217	0.826418	58.01	88.7	111.3	25.14	49.31	High	High	High	High	High	High	1		3	3	Present Both	1	GLYMA_19G185800	GLYMA_19G185800	sp|P93755|C3H30_ARATH	Zinc finger CCCH domain-containing protein 30 GN=BZIP19	ident:22/124 pos:32/124 query:124 hit:716 align:70 bit:31.6	Partial_match_hit	Zinc finger CCCH domain-containing protein 30 (AtC3H30)	na	C3H30_ARATH	P93755	Q94C18	OrderedLocusNames=At2g41900	na	Arabidopsis thaliana (Mouse-ear cress)	3702
High	Master Protein	GLYMA_14G051900	PF07172 - Glycine rich protein family (GRP) (1 of 12)	0	26.579	38	3	4	3	128	12.8	9	10.97	3	0	1.494	0.512357	62.6	73.5	126.5	16.78	68.88	Peak Found	Peak Found	High	High	Peak Found	High	1		3	3	Present Both	1	GLYMA_14G051900	GLYMA_14G051900	sp|Q9ZSJ6|GRP3S_ARATH	Glycine-rich protein 3 short isoform GN=GRP3S	ident:20/128 pos:22/128 query:128 hit:116 align:34 bit:37.4	Partial_match_both	Glycine-rich protein 3 short isoform	na	GRP3S_ARATH	Q9ZSJ6	Q94A93; Q9SHT6	GRP3S	na	Arabidopsis thaliana (Mouse-ear cress)	3702
High	Master Protein	GLYMA_05G147700	PTHR33044:SF7 - NON-SPECIFIC LIPID TRANSFER PROTEIN GPI-ANCHORED 1 (1 of 3)	0	26.545	20	3	10	3	179	19	8.24	34.57	3	0	1.166	0.895579	134.29	167.8	32.2	36.35	90.46	High	High	Not Found	High	Peak Found	High	1		2	3	Present Both	1	GLYMA_05G147700	GLYMA_05G147700	sp|Q9C7F7|LTPG1_ARATH	Non-specific lipid transfer protein GPI-anchored 1 GN=LTPG1	ident:59/179 pos:80/179 query:179 hit:193 align:106 bit:135.2	Poor_match	Non-specific lipid transfer protein GPI-anchored 1 (AtLTPG-1; Protein LTP-GPI-ANCHORED 1)	na	LTPG1_ARATH	Q9C7F7	Q570M7; Q8LEI0	LTPG1	na	Arabidopsis thaliana (Mouse-ear cress)	3702
High	Master Protein	GLYMA_06G020400	K02638 - plastocyanin (petE) (1 of 2)	0	26.333	14	1	4	1	167	16.8	5.2	23.02	1	0	1.581	0.540459	0	77.5	122.5			Not Found	Not Found	High	Not Found	Not Found	High	1		1	1	Missing Both	1	GLYMA_06G020400	GLYMA_06G020400	sp|P11490|PLAS1_ARATH	Plastocyanin minor isoform, chloroplastic GN=PETE	ident:115/167 pos:130/167 query:167 hit:171 align:171 bit:223.0	OK	Plastocyanin minor isoform, chloroplastic	na	PLAS1_ARATH	P11490	P93656; Q52K91; Q9SGS3	PETE	na	Arabidopsis thaliana (Mouse-ear cress)	3702
High	Master Protein	GLYMA_17G147900	PTHR14154//PTHR14154:SF14 - UPF0041 BRAIN PROTEIN 44-RELATED // SUBFAMILY NOT NAMED (1 of 3)	0	26.247	14	5	13	3	264	29.3	5.22	36.62	5	1	1.128	0.928237	32.49	102.2	97.8	36.99	15.56	High	High	Peak Found	High	High	High	1		3	3	Present Both	1	GLYMA_17G147900	GLYMA_17G147900	sp|Q9SYX1|LIL31_ARATH	Light-harvesting complex-like protein 3 isotype 1, chloroplastic GN=LIL3.1	ident:153/264 pos:183/264 query:264 hit:262 align:257 bit:297.0	OK	Light-harvesting complex-like protein 3 isotype 1, chloroplastic	LHC-like protein 3 isoform 1	LIL31_ARATH	Q9SYX1	O23601; Q8LC02	LIL3.1	na	Arabidopsis thaliana (Mouse-ear cress)	3702
High	Master Protein	GLYMA_06G245200	PTHR10438:SF255 - THIOREDOXIN M4, CHLOROPLASTIC (1 of 1)	0	26.245	25	4	15	1	169	18.4	9.25	27.88	4	0	0.635	0.519141	9.3	122.3	77.7	16.52	27.55	High	High	Peak Found	Peak Found	Peak Found	High	1		3	3	Present Both	1	GLYMA_06G245200	GLYMA_06G245200	sp|Q9SEU6|TRXM4_ARATH	Thioredoxin M4, chloroplastic GN=NTRC	ident:89/169 pos:109/169 query:169 hit:193 align:133 bit:192.6	OK	Thioredoxin M4, chloroplastic (AtTrxm4)	na	TRXM4_ARATH	Q9SEU6	Q0WUS9; Q9LDP6	OrderedLocusNames=At3g15360	na	Arabidopsis thaliana (Mouse-ear cress)	3702
High	Master Protein	GLYMA_18G016200	PTHR24078:SF315 - MOLECULAR CHAPERONE DNAJ (1 of 4)	0	26.2	5	3	13	2	440	47.5	9.13	34.9	3	0	0.552	0.264607	5.08	135.7	64.3	8.13	60.85	High	High	Not Found	High	Peak Found	High	1		2	3	Present Both	1	GLYMA_18G016200	GLYMA_18G016200	sp|Q9SJZ7|DNJA6_ARATH	Chaperone protein dnaJ A6, chloroplastic GN=DJA6	ident:322/440 pos:375/440 query:440 hit:442 align:443 bit:643.3	OK	Chaperone protein dnaJ A6, chloroplastic (atDjA6)	Chaperone protein dnaJ A26 (AtDjA26)	DNJA6_ARATH	Q9SJZ7	Q7Y204; Q8LGF3	DJA6	na	Arabidopsis thaliana (Mouse-ear cress)	3702
High	Master Protein	GLYMA_17G021200	PTHR10869:SF64 - OXIDOREDUCTASE, 2OG-FE(II) OXYGENASE FAMILY PROTEIN-RELATED (1 of 4)	0	26.194	15	4	14	1	298	33	7.24	36.98	4	0	1.405	0.725051	12.06	83.2	116.8	18.1		High	High	High	High	High	High	1		3	3	Present Both	1	GLYMA_17G021200	GLYMA_17G021200	sp|Q8LAN3|P4H4_ARATH	Probable prolyl 4-hydroxylase 4 GN=P4H4	ident:215/298 pos:249/298 query:298 hit:298 align:298 bit:452.6	OK	Probable prolyl 4-hydroxylase 4 (AtP4H4)	na	P4H4_ARATH	Q8LAN3	Q8RWK0	P4H4	na	Arabidopsis thaliana (Mouse-ear cress)	3702
High	Master Protein	GLYMA_04G015800	PTHR34048:SF1 - CHLOROPLAST INNER MEMBRANE LOCALIZED PROTEIN (1 of 4)	0	26.162	6	3	12	3	225	24.9	8.78	32.87	3	0	1.13	0.924565	28.33	98.5	101.5	5.01	18.47	High	High	High	High	Peak Found	High	1		3	3	Present Both	1	GLYMA_04G015800	GLYMA_04G015800	sp|F4J1U4|KN12E_ARATH	Kinesin-like protein KIN-12E GN=KIN12E	ident:21/225 pos:42/225 query:225 hit:1263 align:85 bit:30.4	Partial_match_both	Kinesin-like protein KIN-12E	na	KN12E_ARATH	F4J1U4	Q9LXV6	KIN12E	na	Arabidopsis thaliana (Mouse-ear cress)	3702
High	Master Protein	GLYMA_10G039900	K02894 - large subunit ribosomal protein L23e (RP-L23e, RPL23) (1 of 4)	0	26.143	34	5	27	5	140	15	10.39	69.71	5	0	1.55	0.461051	56.38	84.4	115.6	8.63	24.12	High	High	High	High	High	High	1		3	3	Present Both	1	GLYMA_10G039900	GLYMA_10G039900	sp|P49690|RL23_ARATH	60S ribosomal protein L23 GN=RPL23C	ident:137/140 pos:140/140 query:140 hit:140 align:140 bit:278.5	OK	60S ribosomal protein L23	Protein EMBRYO DEFECTIVE 2171	RL23_ARATH	P49690	Q8L8P0; Q9SDB5	RPL23A	na	Arabidopsis thaliana (Mouse-ear cress)	3702
High	Master Protein	GLYMA_01G225900	PTHR11566:SF58 - DYNAMIN-RELATED PROTEIN 1A (1 of 6)	0	26.116	6	3	8	3	610	68.3	7.62	21.36	3	0	1.023	0.987627	42.87	99.7	100.3	30.47	45.06	High	High	Peak Found	High	Peak Found	Peak Found	1	Acetyl [N-Term]	3	3	Present Both	1	GLYMA_01G225900	GLYMA_01G225900	sp|P42697|DRP1A_ARATH	Dynamin-related protein 1A GN=DRP1A	ident:531/610 pos:586/610 query:610 hit:610 align:610 bit:1129.0	OK	Dynamin-related protein 1A	Dynamin-like protein 1; Dynamin-like protein A; Protein RADIAL SWELLING 9	DRP1A_ARATH	P42697	Q0WLG2; Q1EBU0; Q39118; Q8L9V5; Q8LPS7	DRP1A	ADL1; ADL1A; AG68; RSW9	Arabidopsis thaliana (Mouse-ear cress)	3702
High	Master Protein	GLYMA_05G173100		0	26.019	55	5	8	4	139	15	9.7	29.58	5	1	2.671	0.0753344	101.01	26.4	173.6	11.59	40.22	High	Peak Found	Peak Found	High	High	High	1	Acetyl [N-Term]	3	3	Present Both	1	GLYMA_05G173100	GLYMA_05G173100	sp|P54888|P5CS2_ARATH	Delta-1-pyrroline-5-carboxylate synthase B GN=P5CSB	ident:23/139 pos:48/139 query:139 hit:726 align:105 bit:34.3	Partial_match_hit	Gamma-glutamyl phosphate reductase	Gamma-glutamyl kinase (GPR); Glutamate-5-semialdehyde dehydrogenase; Glutamyl-gamma-semialdehyde dehydrogenase	P5CS2_ARATH	P54888	Q9M061	P5CSB	P5CS2	Arabidopsis thaliana (Mouse-ear cress)	3702
High	Master Protein	GLYMA_01G167300	K02938 - large subunit ribosomal protein L8e (RP-L8e, RPL8) (1 of 4)	0	25.959	16	3	7	3	261	28.1	10.9	23.48	3	0	0.921	0.969869	45.01	123.7	76.3	71.47	24.18	High	Peak Found	High	Peak Found	Peak Found	High	1		3	3	Present Both	1	GLYMA_01G167300	GLYMA_01G167300	sp|Q42064|RL83_ARATH	60S ribosomal protein L8-3 GN=RPL8C	ident:242/261 pos:255/261 query:261 hit:258 align:258 bit:503.1	OK	60S ribosomal protein L8-3	na	RL83_ARATH	Q42064	Q7DLL7	RPL8C	na	Arabidopsis thaliana (Mouse-ear cress)	3702
High	Master Protein	GLYMA_06G039500	PTHR33926:SF2 - PROTEIN TIC 22, CHLOROPLASTIC (1 of 3)	0	25.808	18	4	15	4	260	29	9.04	47.63	4	0	0.998	0.999087	46.6	97.4	102.6	36.24	23.87	High	High	High	High	Peak Found	High	1		3	3	Present Both	1	GLYMA_06G039500	GLYMA_06G039500	sp|Q9SZB2|TIC22_ARATH	Protein TIC 22, chloroplastic GN=TIC22	ident:185/260 pos:211/260 query:260 hit:268 align:268 bit:369.8	OK	Protein TIC 22, chloroplastic	Translocon at the inner envelope membrane of chloroplasts 22 (AtTIC22)	TIC22_ARATH	Q9SZB2	F4JIW4	TIC22	TIC22-IV	Arabidopsis thaliana (Mouse-ear cress)	3702
High	Master Protein	GLYMA_15G198100	K10088 - protein OS-9 (OS9) (1 of 2)	0	25.774	26	4	8	4	294	34	5.96	29.25	4	0	2.142	0.290679	40.13	125.1	74.9	72.23	128.02	Peak Found	Peak Found	High	Peak Found	Peak Found	High	1		3	3	Present Both	1	GLYMA_15G198100	GLYMA_15G198100	sp|Q8GWH3|OS9_ARATH	Protein OS-9 homolog GN=OS9	ident:162/294 pos:197/294 query:294 hit:282 align:264 bit:335.5	OK	Protein OS-9 homolog (AtOS9)	Protein EMS-MUTAGENIZED BRI1 SUPPRESSOR 6	OS9_ARATH	Q8GWH3	O65221; Q8LD14	OS9	na	Arabidopsis thaliana (Mouse-ear cress)	3702
High	Master Protein	GLYMA_02G205500	PTHR23253//PTHR23253:SF32 - EUKARYOTIC TRANSLATION INITIATION FACTOR 4 GAMMA // SUBFAMILY NOT NAMED (1 of 4)	0	25.668	6	6	18	2	784	86.1	8	38.95	6	3	0.805	0.869416	24.61	115.2	84.8	45.05	31.52	High	High	Not Found	High	Peak Found	High	1		2	3	Present Both	1	GLYMA_02G205500	GLYMA_02G205500	sp|Q93ZT6|IF4G1_ARATH	Eukaryotic translation initiation factor isoform 4G-1 GN=EIF(ISO)4G1	ident:531/784 pos:642/784 query:784 hit:780 align:794 bit:999.2	OK	Eukaryotic translation initiation factor isoform 4G-1 (eIF(iso)4G-1)	na	IF4G1_ARATH	Q93ZT6	F4KDF4; Q8H0T8; Q8H179; Q9FJM7	EIF(ISO)4G1	na	Arabidopsis thaliana (Mouse-ear cress)	3702
High	Master Protein	GLYMA_15G152900	PF00168 - C2 domain (C2) (1 of 196)	0	25.668	18	7	14	7	286	30.6	7.65	32.81	7	0	0.633	0.509673	20.01	173.8	26.2	56.72	26.88	High	High	Peak Found	High	High	Peak Found	1		3	3	Present Both	1	GLYMA_15G152900	GLYMA_15G152900	sp|O04023|SRC2_ARATH	Protein SRC2 homolog GN=SRC2	ident:118/286 pos:155/286 query:286 hit:324 align:290 bit:167.2	Poor_match	Protein SRC2 homolog (AtSRC2)	na	SRC2_ARATH	O04023	O81814	SRC2	na	Arabidopsis thaliana (Mouse-ear cress)	3702
[truncated: 794 more rows]
[truncated: 18 more columns]

## Sheet: LFQ
Control/Salt-treatment (50 mM) Leaf Plasma Membrane Orthologs with fold changes
								Do not include column headers for copy/paste to STRING-DB input boxes
Actual			1414		Arabidopsis			Arabidopsis
Accession	Abundance Ratio: (Sample) / (Control)	Abundance Ratio Adj. P-Value: (Sample) / (Control)	Counter	match_status	Accession	Log2 FC		Accession	Log2 FC
GLYMA_11G061300.1.p	0.838	0.921221	1	OK	P23321	-0.254978		P23321	-0.254978
[truncated: 1,413 more rows]

## Sheet: UP-Regulated
Leaf: Up-regulated in 50 mM salt treatment; significant candidates (FDR [false discovery rate] < 0.10)
[truncated: 63 more rows]

[truncated: 1 more sheets: Down-Regulated]
