# Supplementary material for: Membrane Proteomic Profiling of Soybean Leaf and Root Tissues Uncovers Salt-Stress-Responsive Membrane Proteins
Source: Int J Mol Sci. 2022 Oct 31;23(21):13270. doi: 10.3390/ijms232113270 (PMC9655375; doi:10.3390/ijms232113270)
Supplement: Supplementary file 1 [file ijms-23-13270-s001.zip › Table S2.xlsx]

## Sheet: ReadMe
Column	Header	Description
AF	Present_Control	Count of how many Control samples had quant data	Computed in Python script
AG	Present_Sample	Count of how many salt-treatment samples had quant data	Computed in Python script
AH	Missing_Status	Missing value status (present is 2/3 or 3/3; missing is 1/3 or 0/3)	Computed in Python script
AI	Counter	Column of ones for row counting
AJ	Index	Copy of Accession column (keys used in annotation script)
AK	query_acc	Accession of identified protein	Ortholog mapping
AL	hit_acc	Accession of Adabidopsis ortholog	Ortholog mapping
AM	hit_desc	Description of Adabidopsis ortholog	Ortholog mapping
AN	blast_scores	Summary of BLAST alignment	Ortholog mapping
AO	match_status	Summary of relative match status	Ortholog mapping
AP	Primary Protein Name	Main protein name	UniProt annotations
AQ	Alternative Protein Names	Any other protein names	UniProt annotations
AR	Identifier	Swiss-Prot identifier	UniProt annotations
AS	Accession	Swiss-Prot accession	UniProt annotations
AT	Other Accessions	Any other accessions	UniProt annotations
AU	UniProt Gene Name	UniProt gene symbols	UniProt annotations
AV	Other Gene Synonyms	Any other gene symbols	UniProt annotations
AW	Species Name	Species name	UniProt annotations
AX	Taxonomy Number	Taxonomy number	UniProt annotations
AY	UniProt Link	Link to UniProt knowledgebase	UniProt annotations
AZ	Key Words	UniProt keyword lists (a controlled vocabulary added by curation)	UniProt annotations
BA	KW: Biological process	Keywords separated into categories	UniProt annotations
BB	KW: Cellular component	Keywords separated into categories	UniProt annotations
BC	KW: Coding sequence diversity	Keywords separated into categories	UniProt annotations
BD	KW: Developmental stage	Keywords separated into categories	UniProt annotations
BE	KW: Disease	Keywords separated into categories	UniProt annotations
BF	KW: Domain	Keywords separated into categories	UniProt annotations
BG	KW: Ligand	Keywords separated into categories	UniProt annotations
BH	KW: Molecular function	Keywords separated into categories	UniProt annotations
BI	KW: PTM	Keywords separated into categories	UniProt annotations
BJ	KW: Technical term	Keywords separated into categories	UniProt annotations
BK	GO: Biological Process	GO terms	UniProt annotations
BL	GO: Cellular Component	GO terms	UniProt annotations
BM	GO: Molecular Function	GO terms	UniProt annotations
BN	CC Pathway	Manual curation pathway notes	UniProt annotations
BO	Reactome Pathway	Reactome pathway information	UniProt annotations
BP	Trim	Blank column

## Sheet: Identified Proteins 100mM Leaf
Protein FDR Confidence: Combined	Master	Accession	Description	Exp. q-value: Combined	Sum PEP Score	Coverage [%]	# Peptides	# PSMs	# Unique Peptides	# AAs	MW [kDa]	calc. pI	Score Sequest HT: Sequest HT	# Peptides (by Search Engine): Sequest HT	# Razor Peptides	Abundance Ratio: (Sample) / (Control)	Abundance Ratio Adj. P-Value: (Sample) / (Control)	Abundance Ratio Variability [%]: (Sample) / (Control)	Abundances (Grouped): Control	Abundances (Grouped): Sample	Abundances (Grouped) CV [%]: Control	Abundances (Grouped) CV [%]: Sample	Control 1	Control 2	Control 3	100 mm Leaf Replicate 1	100 mm Leaf Replicate 2	100 mm Leaf Replicate 3	# Protein Groups	Modifications	Present_Control	Present_Sample	Missing_Status	Counter	Index	query_acc	hit_acc	hit_desc	blast_scores	match_status	Primary Protein Name	Alternative Protein Names	Identifier	Accession	Other Accessions	UniProt Gene Name	Other Gene Synonyms	Species Name	Taxonomy Number
High	Master Protein	GLYMA_01G234200		0	268.492	45	15	99	15	157	17.3	9.54	371.57	15	0	0.966	0.972386	53.12	96.3	103.7	29.25	60.36	High	High	High	High	High	High	1		3	3	Present Both	1	GLYMA_01G234200	GLYMA_01G234200	sp|Q8L840|RQL4A_ARATH	ATP-dependent DNA helicase Q-like 4A GN=RECQL4A	ident:34/157 pos:43/157 query:157 hit:1188 align:101 bit:28.1	Partial_match_hit	ATP-dependent DNA helicase Q-like 4A	RecQ-like protein 4A (AtRecQ4A; AtRecQl4A); SGS1-like protein (AtSGS1)	RQL4A_ARATH	Q8L840	O04092; Q9FT71	RECQL4A	RECQ4A; RQL4A; SGS1	Arabidopsis thaliana (Mouse-ear cress)	3702
High	Master Protein	GLYMA_01G010600		0	238.537	86	11	86	11	138	15.9	9.55	289.85	11	0	0.932	0.956085	58.09	98.4	101.6	6.07	53.25	High	High	High	High	High	High	1		3	3	Present Both	1	GLYMA_01G010600	GLYMA_01G010600	sp|Q9SSE8|GLYT1_ARATH	Probable glycosyltransferase At3g07620 GN=GLU2	ident:10/138 pos:25/138 query:138 hit:470 align:47 bit:28.9	Partial_match_both	Probable glycosyltransferase At3g07620	na	GLYT1_ARATH	Q9SSE8	na	OrderedLocusNames=At3g07620	na	Arabidopsis thaliana (Mouse-ear cress)	3702
High	Master Protein	GLYMA_17G079700		0	214.227	68	10	80	10	126	14.4	9.35	331.49	10	0	1.708	0.722593	80.67	66.7	133.3	8.78	20.12	High	High	High	High	High	High	1		3	3	Present Both	1	GLYMA_17G079700	GLYMA_17G079700	sp|Q9C7I1|ATL34_ARATH	RING-H2 finger protein ATL34 GN=ATL34	ident:19/126 pos:31/126 query:126 hit:327 align:71 bit:28.9	Partial_match_hit	RING-H2 finger protein ATL34	RING-type E3 ubiquitin transferase ATL34	ATL34_ARATH	Q9C7I1	na	ATL34	na	Arabidopsis thaliana (Mouse-ear cress)	3702
High	Master Protein	GLYMA_11G182300		0	193.564	74	9	82	3	115	12.3	9.61	404.18	9	0	1.024	0.992627	48.93	100.8	99.2	7.68	28.78	High	High	High	High	High	High	1		3	3	Present Both	1	GLYMA_11G182300	GLYMA_11G182300	sp|Q9ZUX4|UMP2_ARATH	Uncharacterized protein At2g27730, mitochondrial GN=UKL2	ident:67/115 pos:82/115 query:115 hit:113 align:119 bit:92.4	OK	Uncharacterized protein At2g27730, mitochondrial	na	UMP2_ARATH	Q9ZUX4	Q8LBD1	OrderedLocusNames=At2g27730	na	Arabidopsis thaliana (Mouse-ear cress)	3702
High	Master Protein	GLYMA_12G090500		0	188.535	74	10	70	4	115	12.2	9.61	358.79	10	6	1.229	0.926521	79.8	90.3	109.7	20	31.14	High	High	High	High	High	High	1		3	3	Present Both	1	GLYMA_12G090500	GLYMA_12G090500	sp|Q9ZUX4|UMP2_ARATH	Uncharacterized protein At2g27730, mitochondrial GN=UKL2	ident:63/115 pos:80/115 query:115 hit:113 align:116 bit:91.3	OK	Uncharacterized protein At2g27730, mitochondrial	na	UMP2_ARATH	Q9ZUX4	Q8LBD1	OrderedLocusNames=At2g27730	na	Arabidopsis thaliana (Mouse-ear cress)	3702
High	Master Protein	GLYMA_20G025000		0	149.225	51	13	53	7	230	25.6	9.83	165.65	13	7	1.735	0.709832	70.3	67	133	24.99	31.74	High	High	High	High	High	High	1		3	3	Present Both	1	GLYMA_20G025000	GLYMA_20G025000	sp|Q84K90|RHIP1_ARATH	RGS1-HXK1-interacting protein 1 GN=RHIP1	ident:114/230 pos:167/230 query:230 hit:263 align:203 bit:235.7	OK	RGS1-HXK1-interacting protein 1	na	RHIP1_ARATH	Q84K90	O65593	RHIP1	na	Arabidopsis thaliana (Mouse-ear cress)	3702
High	Master Protein	GLYMA_06G015300		0	149.082	72	14	61	14	167	19.5	9.64	194.85	14	0	1.056	0.992627	46.28	92.9	107.1	42.43	15.2	High	High	High	High	High	High	1	Acetyl [N-Term]	3	3	Present Both	1	GLYMA_06G015300	GLYMA_06G015300	sp|Q9FPG2|OP21B_ARATH	Outer envelope pore protein 21B, chloroplastic GN=OEP21B	ident:97/167 pos:131/167 query:167 hit:167 align:167 bit:226.5	OK	Outer envelope pore protein 21B, chloroplastic	Chloroplastic outer envelope pore protein of 21 kDa B	OP21B_ARATH	Q9FPG2	F4I2D6	OEP21B	na	Arabidopsis thaliana (Mouse-ear cress)	3702
High	Master Protein	GLYMA_13G350800		0	135.924	39	13	45	1	329	37.3	8.97	125.67	13	12	0.441	0.42593	10.86	138.3	61.7	64.46	27.52	High	High	Not Found	High	Peak Found	Not Found	1		2	2	Present Both	1	GLYMA_13G350800	GLYMA_13G350800	sp|Q9C717|FLXL3_ARATH	Protein FLX-like 3 GN=FLXL3	ident:147/329 pos:198/329 query:329 hit:283 align:289 bit:251.1	Poor_match	Protein FLX-like 3 (AtFLXL3)	na	FLXL3_ARATH	Q9C717	Q9C887	FLXL3	FLL3	Arabidopsis thaliana (Mouse-ear cress)	3702
High	Master Protein	GLYMA_02G138600		0	125.036	30	7	36	7	160	17.2	10.58	171.12	7	0	0.513	0.557668	20.99	158.2	41.8	6.81	108.17	High	High	High	High	High	Peak Found	1		3	3	Present Both	1	GLYMA_02G138600	GLYMA_02G138600	sp|Q9LPC5|BIG3_ARATH	Brefeldin A-inhibited guanine nucleotide-exchange protein 3 GN=BIG3	ident:16/160 pos:17/160 query:160 hit:1750 align:31 bit:28.9	Partial_match_both	Brefeldin A-inhibited guanine nucleotide-exchange protein 3 (BIG3)	ARF guanine-nucleotide exchange factor BIG3; Protein EMBRYO SAC DEVELOPMENT ARREST 10	BIG3_ARATH	Q9LPC5	na	BIG3	EDA10	Arabidopsis thaliana (Mouse-ear cress)	3702
High	Master Protein	GLYMA_07G009200		0	115.65	76	4	41	4	66	6.2	10.3	246.87	4	0	1.404	0.854204	64.02	81.5	118.5	10.68	35.02	High	High	High	High	High	High	1		3	3	Present Both	1	GLYMA_07G009200	GLYMA_07G009200	sp|Q9SAJ5|PP133_ARATH	Pentatricopeptide repeat-containing protein At1g79540 GN=PCMP-E65	ident:10/66 pos:16/66 query:66 hit:780 align:26 bit:25.4	Partial_match_both	Pentatricopeptide repeat-containing protein At1g79540	na	PP133_ARATH	Q9SAJ5	na	OrderedLocusNames=At1g79540	na	Arabidopsis thaliana (Mouse-ear cress)	3702
High	Master Protein	GLYMA_03G080200		0	108.891	32	7	37	2	197	20.9	4.86	130.19	7	5	0.594	0.671207	22.79	136	64	39.28	24.76	High	High	High	High	High	High	1		3	3	Present Both	1	GLYMA_03G080200	GLYMA_03G080200	sp|Q8LDV3|Y4320_ARATH	Uncharacterized protein At4g13200, chloroplastic GN=CBSCBSPB1	ident:61/197 pos:74/197 query:197 hit:185 align:96 bit:125.6	Partial_match_both	Uncharacterized protein At4g13200, chloroplastic	na	Y4320_ARATH	Q8LDV3	Q9SVQ7	OrderedLocusNames=At4g13200	na	Arabidopsis thaliana (Mouse-ear cress)	3702
High	Master Protein	GLYMA_04G230700		0	106.386	85	5	35	3	72	8.2	7.52	143.65	5	3	1.934	0.616813	96.38	69.4	130.6	30.8	55.47	High	High	High	High	High	High	1		3	3	Present Both	1	GLYMA_04G230700	GLYMA_04G230700	sp|Q9C9I8|ERF20_ARATH	Ethylene-responsive transcription factor ERF020 GN=ERF020	ident:16/72 pos:21/72 query:72 hit:143 align:40 bit:28.1	Partial_match_hit	Ethylene-responsive transcription factor ERF020	na	ERF20_ARATH	Q9C9I8	na	ERF020	na	Arabidopsis thaliana (Mouse-ear cress)	3702
High	Master Protein	GLYMA_18G149300		0	99.679	27	6	30	1	193	20.7	5.68	115.32	6	0	0.623	0.735127	11.52	123.2	76.8	39.58	3.56	High	High	Peak Found	High	High	Not Found	1		3	2	Present Both	1	GLYMA_18G149300	GLYMA_18G149300	sp|Q8LDV3|Y4320_ARATH	Uncharacterized protein At4g13200, chloroplastic GN=CBSCBSPB1	ident:69/193 pos:88/193 query:193 hit:185 align:118 bit:126.7	Poor_match	Uncharacterized protein At4g13200, chloroplastic	na	Y4320_ARATH	Q8LDV3	Q9SVQ7	OrderedLocusNames=At4g13200	na	Arabidopsis thaliana (Mouse-ear cress)	3702
High	Master Protein	GLYMA_07G225100		0	96.492	39	8	35	2	231	25.7	9.83	106.41	8	0	0.732	0.830339	32.81	113.7	86.3	11.91	59.52	High	Peak Found	High	High	Not Found	High	1		3	2	Present Both	1	GLYMA_07G225100	GLYMA_07G225100	sp|Q84K90|RHIP1_ARATH	RGS1-HXK1-interacting protein 1 GN=RHIP1	ident:113/231 pos:163/231 query:231 hit:263 align:203 bit:229.6	Poor_match	RGS1-HXK1-interacting protein 1	na	RHIP1_ARATH	Q84K90	O65593	RHIP1	na	Arabidopsis thaliana (Mouse-ear cress)	3702
High	Master Protein	GLYMA_10G277900		0	95.559	25	5	40	4	85	9.7	9.79	166.22	5	1	0.834	0.893467	65.71	117.5	82.5	61.82	29.14	High	High	High	High	High	High	1		3	3	Present Both	1	GLYMA_10G277900	GLYMA_10G277900	sp|Q9ZUX4|UMP2_ARATH	Uncharacterized protein At2g27730, mitochondrial GN=UKL2	ident:22/85 pos:30/85 query:85 hit:113 align:38 bit:41.2	Partial_match_both	Uncharacterized protein At2g27730, mitochondrial	na	UMP2_ARATH	Q9ZUX4	Q8LBD1	OrderedLocusNames=At2g27730	na	Arabidopsis thaliana (Mouse-ear cress)	3702
High	Master Protein	GLYMA_01G182600		0	93.467	30	7	23	4	169	17.7	5.4	79	7	3	0.98	0.973365	90.76	111.1	88.9	67.26	67.61	High	High	High	High	High	Peak Found	1		3	3	Present Both	1	GLYMA_01G182600	GLYMA_01G182600	sp|Q9C638|WEL2_ARATH	Protein WEAK CHLOROPLAST MOVEMENT UNDER BLUE LIGHT-like 2 GN=WEL2	ident:39/169 pos:67/169 query:169 hit:752 align:151 bit:28.1	Partial_match_hit	Protein WEAK CHLOROPLAST MOVEMENT UNDER BLUE LIGHT-like 2 (Protein WEL2)	na	WEL2_ARATH	Q9C638	na	WEL2	na	Arabidopsis thaliana (Mouse-ear cress)	3702
High	Master Protein	GLYMA_05G020300		0	92.794	72	4	39	4	54	6.1	5.11	138.75	4	0	1.119	0.972386	67.52	68	132	30.77	55.94	High	High	High	High	High	High	1		3	3	Present Both	1	GLYMA_05G020300	GLYMA_05G020300	sp|Q9SD80|TOM5_ARATH	Mitochondrial import receptor subunit TOM5 homolog GN=TOM5	ident:28/54 pos:44/54 query:54 hit:54 align:54 bit:70.1	OK	Mitochondrial import receptor subunit TOM5 homolog	Translocase of outer membrane 5 kDa subunit homolog	TOM5_ARATH	Q9SD80	P83431	TOM5	na	Arabidopsis thaliana (Mouse-ear cress)	3702
High	Master Protein	GLYMA_12G082200		0	85.18	93	6	20	6	68	7.1	10.37	72.62	6	0	1.246	0.915191	73.95	108.7	91.3	41.77	83.63	High	High	High	High	High	High	1		3	3	Present Both	1	GLYMA_12G082200	GLYMA_12G082200	sp|Q9C7A2|ITN1_ARATH	Ankyrin repeat-containing protein ITN1 GN=ITN1	ident:12/68 pos:19/68 query:68 hit:590 align:33 bit:26.2	Partial_match_both	Ankyrin repeat-containing protein ITN1	Protein INCREASED TOLERANCE TO NACL	ITN1_ARATH	Q9C7A2	Q8LED2; Q9LHH2	ITN1	na	Arabidopsis thaliana (Mouse-ear cress)	3702
High	Master Protein	GLYMA_06G141900		0	84.849	87	6	38	4	52	5.8	9.7	131.5	6	2	1.619	0.766578	72.41	60.7	139.3	62.17	27.02	High	High	High	High	High	High	1		3	3	Present Both	1	GLYMA_06G141900	GLYMA_06G141900	sp|Q9SYK4|IP5PD_ARATH	Type I inositol polyphosphate 5-phosphatase 13 GN=IP5P13	ident:11/52 pos:18/52 query:52 hit:1136 align:32 bit:24.6	Partial_match_hit	Type I inositol polyphosphate 5-phosphatase 13 (At5PTase13)	na	IP5PD_ARATH	Q9SYK4	F4IAA0; Q712D7	IP5P13	na	Arabidopsis thaliana (Mouse-ear cress)	3702
High	Master Protein	GLYMA_20G110900		0	82.302	22	3	37	2	88	10	9.7	152.23	3	0	0.625	0.715256	24.11	135.7	64.3	49.59	84.97	High	High	High	High	High	High	1		3	3	Present Both	1	GLYMA_20G110900	GLYMA_20G110900	sp|Q9ZUX4|UMP2_ARATH	Uncharacterized protein At2g27730, mitochondrial GN=UKL2	ident:19/88 pos:27/88 query:88 hit:113 align:32 bit:38.9	Partial_match_both	Uncharacterized protein At2g27730, mitochondrial	na	UMP2_ARATH	Q9ZUX4	Q8LBD1	OrderedLocusNames=At2g27730	na	Arabidopsis thaliana (Mouse-ear cress)	3702
High	Master Protein	GLYMA_12G066300		0	75.54	64	7	31	2	67	7.8	10.61	88.91	7	4	1.451	0.833854	82.28	82.2	117.8	64.66	102.65	High	High	Not Found	High	Peak Found	High	1		2	3	Present Both	1	GLYMA_12G066300	GLYMA_12G066300	sp|Q8W037|NIP21_ARATH	Aquaporin NIP2-1 GN=NIP2-1	ident:18/67 pos:28/67 query:67 hit:288 align:49 bit:30.4	Partial_match_hit	Aquaporin NIP2-1	NOD26-like intrinsic protein 2-1 (AtNIP2;1); Nodulin-26-like major intrinsic protein 4 (NodLikeMip4; Protein NLM4)	NIP21_ARATH	Q8W037	O64706; Q1ECK8	NIP2-1	NLM4	Arabidopsis thaliana (Mouse-ear cress)	3702
High	Master Protein	GLYMA_08G130200		0	69.654	39	5	20	5	64	7.6	8.54	83.87	5	0	1.514	0.807637	63.83	91.3	108.7	51.5	94.86	High	High	High	High	High	High	1		3	3	Present Both	1	GLYMA_08G130200	GLYMA_08G130200	sp|Q9XIF4|TRXH7_ARATH	Thioredoxin H7 GN=TRX7	ident:12/64 pos:23/64 query:64 hit:129 align:37 bit:26.6	Partial_match_hit	Thioredoxin H7 (AtTrxh7)	na	TRXH7_ARATH	Q9XIF4	na	TRX7	na	Arabidopsis thaliana (Mouse-ear cress)	3702
High	Master Protein	GLYMA_13G308300		0	64.252	49	3	12	3	91	10.4	6.54	61.26	3	0	1.354	0.869455	47.32	98	102	4.78	88.83	High	High	Peak Found	High	High	High	1		3	3	Present Both	1	GLYMA_13G308300.3.p	GLYMA_13G308300.3.p	sp|Q38821|2ABA_ARATH	Serine/threonine protein phosphatase 2A 55 kDa regulatory subunit B alpha isoform GN=PP2AB1	ident:11/91 pos:17/91 query:91 hit:513 align:43 bit:29.6	Partial_match_both	Serine/threonine protein phosphatase 2A 55 kDa regulatory subunit B alpha isoform (AtB alpha; PP2A, subunit B, alpha isoform)	na	2ABA_ARATH	Q38821	Q0WL96; Q27GN0; Q8L842; Q9C8H8	PP2AB1	na	Arabidopsis thaliana (Mouse-ear cress)	3702
High	Master Protein	GLYMA_15G147300		0	61.04	44	9	30	9	198	22.3	5.73	77	9	0	1.343	0.871876	106.97	74.7	125.3	32.07	74.92	High	High	High	High	High	High	1		3	3	Present Both	1	GLYMA_15G147300	GLYMA_15G147300	sp|Q4PT37|NEAP3_ARATH	Nuclear envelope-associated protein 3 GN=NEAP3	ident:31/198 pos:48/198 query:198 hit:336 align:86 bit:35.4	Partial_match_both	Nuclear envelope-associated protein 3 (AtNEAP3)	na	NEAP3_ARATH	Q4PT37	O80530	NEAP3	na	Arabidopsis thaliana (Mouse-ear cress)	3702
High	Master Protein	GLYMA_20G188900		0	59.489	35	4	15	4	142	15.6	9.09	66.96	4	0	1.265	0.905854	60.09	93.1	106.9	58.58	29.97	High	High	Peak Found	High	High	High	1		3	3	Present Both	1	GLYMA_20G188900	GLYMA_20G188900	sp|O22834|LRK53_ARATH	Probable L-type lectin-domain containing receptor kinase V.3 GN=LECRK53	ident:10/142 pos:15/142 query:142 hit:664 align:23 bit:29.6	Partial_match_both	Probable L-type lectin-domain containing receptor kinase V.3 (Arabidopsis thaliana lectin-receptor kinase c2; AthlecRK-c2; LecRK-V.3)	na	LRK53_ARATH	O22834	na	LECRK53	LECRKC2	Arabidopsis thaliana (Mouse-ear cress)	3702
High	Master Protein	GLYMA_11G060900		0	51.928	25	5	11	2	162	16.8	5.66	44.7	5	0	0.573	0.648226	31.43	88.3	111.7	108.7	118.31	High	Peak Found	Peak Found	Peak Found	High	Not Found	1		3	2	Present Both	1	GLYMA_11G060900	GLYMA_11G060900	sp|Q4F7G0|ERDL2_ARATH	Sugar transporter ERD6-like 2 GN=SUGTL3	ident:23/162 pos:32/162 query:162 hit:462 align:63 bit:31.6	Partial_match_both	Sugar transporter ERD6-like 2	Sugar transporter-like protein 3	ERDL2_ARATH	Q4F7G0	O04040; Q94F32; Q9SCW8	SUGTL3	na	Arabidopsis thaliana (Mouse-ear cress)	3702
High	Master Protein	GLYMA_04G223400		0	45.619	87	5	30	3	52	5.8	9.7	88.16	5	0	1.887	0.642188	49.46	76.6	123.4	27.1	34.45	High	High	High	High	High	High	1		3	3	Present Both	1	GLYMA_04G223400	GLYMA_04G223400	sp|P54144|AMT11_ARATH	Ammonium transporter 1 member 1 GN=AMT1-1	ident:11/52 pos:14/52 query:52 hit:501 align:25 bit:25.8	Partial_match_both	Ammonium transporter 1 member 1 (AtAMT1;1)	na	AMT11_ARATH	P54144	Q94C23	AMT1-1	na	Arabidopsis thaliana (Mouse-ear cress)	3702
High	Master Protein	GLYMA_09G154800		0	42.489	23	3	11	3	133	13.7	8.81	41.94	3	0	1.385	0.86749	39.05	94	106	13.41	64.56	High	High	Not Found	High	High	High	1		2	3	Present Both	1	GLYMA_09G154800	GLYMA_09G154800	sp|P42735|CDI8_ARATH	Cadmium-induced protein AS8 GN=APC6	ident:33/133 pos:51/133 query:133 hit:171 align:115 bit:33.1	Poor_match	Cadmium-induced protein AS8	na	CDI8_ARATH	P42735	na	OrderedLocusNames=At4g19070	na	Arabidopsis thaliana (Mouse-ear cress)	3702
High	Master Protein	GLYMA_03G258500		0	41.377	29	2	14	2	63	6.8	8.92	51.24	2	0	1.996	0.592545	71.41	57	143	49.6	84.8	High	High	High	High	High	High	1		3	3	Present Both	1	GLYMA_03G258500	GLYMA_03G258500	sp|F4JD14|BCHC1_ARATH	BEACH domain-containing protein C1 GN=BCHC1	ident:11/63 pos:13/63 query:63 hit:1941 align:26 bit:25.4	Partial_match_both	BEACH domain-containing protein C1	BEACH-domain homolog C1	BCHC1_ARATH	F4JD14	Q9LEX9	BCHC1	na	Arabidopsis thaliana (Mouse-ear cress)	3702
High	Master Protein	GLYMA_20G027200		0	39.403	23	2	7	2	125	12.5	5.27	18.19	2	0	0.317	0.1624	3.87	170	30	28.3	46	High	High	High	Peak Found	High	Not Found	1		3	2	Present Both	1	GLYMA_20G027200	GLYMA_20G027200	sp|Q9ZQ80|NDRP1_ARATH	Nodulin-related protein 1 GN=NRP1	ident:58/125 pos:78/125 query:125 hit:187 align:134 bit:87.0	Poor_match	Nodulin-related protein 1 (AtNRP1)	RPS2-interacting protein 11	NDRP1_ARATH	Q9ZQ80	Q84VZ7	NRP1	na	Arabidopsis thaliana (Mouse-ear cress)	3702
High	Master Protein	GLYMA_15G165900		0	39.161	40	7	19	3	89	10.6	9.35	49.6	7	0	1.957	0.609106	71.09	61	139	18.28	43.38	High	Peak Found	High	High	High	High	1		3	3	Present Both	1	GLYMA_15G165900	GLYMA_15G165900	sp|Q9FXH5|PUP14_ARATH	Purine permease 14 GN=PUP14	ident:15/89 pos:21/89 query:89 hit:393 align:36 bit:28.5	Partial_match_both	Purine permease 14 (AtPUP14)	na	PUP14_ARATH	Q9FXH5	na	PUP14	na	Arabidopsis thaliana (Mouse-ear cress)	3702
High	Master Protein	GLYMA_13G318100		0	38.291	27	5	18	2	159	17.9	5.27	63.55	5	3	0.879	0.930375	51.05	104.1	95.9	69.86	57.65	High	High	High	High	High	High	1		3	3	Present Both	1	GLYMA_13G318100	GLYMA_13G318100	sp|Q39168|U540A_ARATH	UPF0540 protein At1g62000 GN=UTR2	ident:16/159 pos:24/159 query:159 hit:148 align:46 bit:28.9	Partial_match_both	UPF0540 protein At1g62000	na	U540A_ARATH	Q39168	na	OrderedLocusNames=At1g62000	na	Arabidopsis thaliana (Mouse-ear cress)	3702
High	Master Protein	GLYMA_10G222100		0	37.609	26	6	15	2	216	23.5	9.55	41.95	6	4	0.798	0.870724	33.91	133.8	66.2	40.99	30.67	High	High	Not Found	High	Peak Found	Peak Found	1		2	3	Present Both	1	GLYMA_10G222100	GLYMA_10G222100	sp|Q9FEC1|OHP2_ARATH	Light-harvesting complex-like protein OHP2, chloroplastic GN=OHP2	ident:117/216 pos:131/216 query:216 hit:172 align:174 bit:188.0	OK	Light-harvesting complex-like protein OHP2, chloroplastic	One-helix protein 2	OHP2_ARATH	Q9FEC1	Q8LG09	OHP2	na	Arabidopsis thaliana (Mouse-ear cress)	3702
High	Master Protein	GLYMA_07G226600		0	37.5	30	3	8	3	119	12.2	4.86	32	3	0	0.609	0.694554	4.75	132.1	67.9	40.09	27.02	High	High	High	High	Peak Found	Not Found	1		3	2	Present Both	1	GLYMA_07G226600	GLYMA_07G226600	sp|Q9ZQ80|NDRP1_ARATH	Nodulin-related protein 1 GN=NRP1	ident:55/119 pos:76/119 query:119 hit:187 align:121 bit:83.6	Poor_match	Nodulin-related protein 1 (AtNRP1)	RPS2-interacting protein 11	NDRP1_ARATH	Q9ZQ80	Q84VZ7	NRP1	na	Arabidopsis thaliana (Mouse-ear cress)	3702
High	Master Protein	GLYMA_09G059600		0	36.815	56	9	22	5	89	10.5	9.35	51.75	9	3	1.51	0.807637	56.33	79.6	120.4	38.67	67.79	High	High	High	High	High	High	1		3	3	Present Both	1	GLYMA_09G059600	GLYMA_09G059600	sp|Q9FXH5|PUP14_ARATH	Purine permease 14 GN=PUP14	ident:15/89 pos:21/89 query:89 hit:393 align:36 bit:28.5	Partial_match_both	Purine permease 14 (AtPUP14)	na	PUP14_ARATH	Q9FXH5	na	PUP14	na	Arabidopsis thaliana (Mouse-ear cress)	3702
High	Master Protein	GLYMA_09G136800		0	34.542	8	4	11	4	882	96.9	4.83	37.92	4	0	0.811	0.878255	26.78	124.5	75.5	24.26	29.48	High	High	Peak Found	High	High	High	1		3	3	Present Both	1	GLYMA_09G136800	GLYMA_09G136800	sp|Q9FLH0|CRWN4_ARATH	Protein CROWDED NUCLEI 4 GN=CRWN4	ident:35/882 pos:53/882 query:882 hit:1010 align:98 bit:38.1	Partial_match_both	Protein CROWDED NUCLEI 4	Protein LITTLE NUCLEI 4	CRWN4_ARATH	Q9FLH0	F4JXK1; O49539	CRWN4	na	Arabidopsis thaliana (Mouse-ear cress)	3702
High	Master Protein	GLYMA_04G014200		0	31.579	44	4	16	4	100	11.2	9.7	32.3	4	0	0.849	0.905209	46.17	110.2	89.8	38.48	14.25	High	High	Peak Found	High	High	High	1		3	3	Present Both	1	GLYMA_04G014200	GLYMA_04G014200	sp|O80834|AHL9_ARATH	AT-hook motif nuclear-localized protein 9 GN=AHL9	ident:22/100 pos:41/100 query:100 hit:348 align:86 bit:29.3	Partial_match_hit	AT-hook motif nuclear-localized protein 9	na	AHL9_ARATH	O80834	na	AHL9	na	Arabidopsis thaliana (Mouse-ear cress)	3702
High	Master Protein	GLYMA_08G289600		0	30.401	18	1	8	1	117	13.7	5.48	35.12	1	0	1.015	0.992627	61.36	98.3	101.7	38.57	53.16	High	Peak Found	High	High	High	Not Found	1		3	2	Present Both	1	GLYMA_08G289600	GLYMA_08G289600	sp|Q9LUZ4|C3H66_ARATH	Zinc finger CCCH domain-containing protein 66 GN=ZFWD3	ident:20/117 pos:33/117 query:117 hit:607 align:62 bit:27.3	Partial_match_both	Zinc finger CCCH domain-containing protein 66 (AtC3H66)	na	C3H66_ARATH	Q9LUZ4	na	OrderedLocusNames=At5g58620	na	Arabidopsis thaliana (Mouse-ear cress)	3702
High	Master Protein	GLYMA_01G200000		0	30.401	18	1	9	1	127	14.1	8.35	49.77	1	0	1.179	0.97062	11.8	91.8	108.2	12.14	11.14	High	High	Not Found	High	High	Not Found	1		2	2	Present Both	1	GLYMA_01G200000	GLYMA_01G200000	sp|Q8L8Q8|Y5486_ARATH	Uncharacterized protein At5g64816 GN=CBSDUF5	ident:100/127 pos:115/127 query:127 hit:130 align:120 bit:219.9	OK	Uncharacterized protein At5g64816	na	Y5486_ARATH	Q8L8Q8	Q9LV96	OrderedLocusNames=At5g64816	na	Arabidopsis thaliana (Mouse-ear cress)	3702
High	Master Protein	GLYMA_10G107400		0	29.706	23	2	7	2	116	13.2	7.4	24.86	2	0	0.502	0.541623	6.41	133.1	66.9	34.14	55.59	High	High	High	High	High	Peak Found	1		3	3	Present Both	1	GLYMA_10G107400	GLYMA_10G107400	sp|Q8W5R2|SHGR2_ARATH	Phospholipase SGR2 GN=SGR2	ident:17/116 pos:31/116 query:116 hit:933 align:54 bit:26.6	Partial_match_both	Phospholipase SGR2	Protein SHOOT GRAVITROPISM 2	SHGR2_ARATH	Q8W5R2	Q9C6U4; Q9C861	SGR2	na	Arabidopsis thaliana (Mouse-ear cress)	3702
High	Master Protein	GLYMA_11G096300		0	29.493	32	2	9	2	68	7.7	9.32	28.18	2	0	1.403	0.854204	57.07	99.5	100.5	49.1	41.1	High	High	High	High	High	Not Found	1		3	2	Present Both	1	GLYMA_11G096300	GLYMA_11G096300	sp|Q9XII1|PDV2_ARATH	Plastid division protein PDV2 GN=PDV2	ident:9/68 pos:14/68 query:68 hit:307 align:19 bit:25.4	Partial_match_both	Plastid division protein PDV2	Protein PLASTID DIVISION2	PDV2_ARATH	Q9XII1	Q93ZL0	PDV2	na	Arabidopsis thaliana (Mouse-ear cress)	3702
High	Master Protein	GLYMA_01G199100		0	27.744	27	3	4	3	143	15.9	7.71	12.7	3	0	0.743	0.840112	9.71	97.6	102.4	27.81	33.42	High	High	Not Found	High	High	Peak Found	1		2	3	Present Both	1	GLYMA_01G199100	GLYMA_01G199100	sp|O48646|GPX6_ARATH	Probable phospholipid hydroperoxide glutathione peroxidase 6, mitochondrial GN=GPX6	ident:22/143 pos:37/143 query:143 hit:232 align:77 bit:33.1	Partial_match_hit	Probable phospholipid hydroperoxide glutathione peroxidase 6, mitochondrial (AtGPX1; PHGPx)	na	GPX6_ARATH	O48646	Q94BV3	GPX6	GPX1	Arabidopsis thaliana (Mouse-ear cress)	3702
High	Master Protein	GLYMA_12G183000		0	27.204	25	4	15	1	161	18.1	5.29	45.78	4	0	0.855	0.909765	17.5	107.8	92.2	4.82	23.33	High	High	Not Found	High	High	Not Found	1		2	2	Present Both	1	GLYMA_12G183000	GLYMA_12G183000	sp|Q39168|U540A_ARATH	UPF0540 protein At1g62000 GN=UTR2	ident:16/161 pos:24/161 query:161 hit:148 align:46 bit:28.9	Partial_match_both	UPF0540 protein At1g62000	na	U540A_ARATH	Q39168	na	OrderedLocusNames=At1g62000	na	Arabidopsis thaliana (Mouse-ear cress)	3702
High	Master Protein	GLYMA_11G026500		0	25.697	35	3	9	3	124	14.4	9.88	26.03	3	0	1.201	0.942237	39.12	93.3	106.7	15.34	50.65	High	High	Peak Found	High	High	High	1		3	3	Present Both	1	GLYMA_11G026500	GLYMA_11G026500	sp|Q9SI37|WRKY1_ARATH	WRKY transcription factor 1 GN=WRKY1	ident:18/124 pos:28/124 query:124 hit:487 align:52 bit:27.3	Partial_match_both	WRKY transcription factor 1	Transcription factor ZAP1; WRKY DNA-binding protein 1; Zinc-dependent activator protein 1	WRKY1_ARATH	Q9SI37	Q058Q1; Q43388	WRKY1	na	Arabidopsis thaliana (Mouse-ear cress)	3702
High	Master Protein	GLYMA_08G267700		0	25.518	25	3	8	3	257	28.7	4.69	22.9	3	0	2.49	0.481329	100.63	99.2	100.8	14.21	116.37	High	High	High	High	High	Not Found	1		3	2	Present Both	1	GLYMA_08G267700	GLYMA_08G267700	sp|Q9LU01|Y3IP1_ARATH	Ycf3-interacting protein 1, chloroplastic GN=Y3IP1	ident:125/257 pos:150/257 query:257 hit:280 align:177 bit:256.5	Poor_match	Ycf3-interacting protein 1, chloroplastic	Protein CHLOROPLAST ENHANCING STRESS TOLERANCE (AtCEST)	Y3IP1_ARATH	Q9LU01	Q8LDA8	Y3IP1	na	Arabidopsis thaliana (Mouse-ear cress)	3702
High	Master Protein	GLYMA_15G041300		0	24.6	44	4	9	4	55	6.6	10.37	22.95	4	0	1.113	0.972386	81.52	162.9	37.1	70.84	59.23	High	High	Peak Found	High	High	Peak Found	1		3	3	Present Both	1	GLYMA_15G041300	GLYMA_15G041300	sp|Q9ZWA9|CRU4_ARATH	12S seed storage protein CRD GN=CRD	ident:11/55 pos:15/55 query:55 hit:451 align:20 bit:25.8	Partial_match_both	12S seed storage protein CRD beta chain	Cruciferin D; Legumin-type globulin storage protein CRD; 12S seed storage protein CRD acidic chain; 12S seed storage protein CRD basic chain	CRU4_ARATH	Q9ZWA9	Q67ZY3	CRD	CRU2	Arabidopsis thaliana (Mouse-ear cress)	3702
High	Master Protein	GLYMA_01G055400		0	22.936	10	2	17	2	185	20.6	8.54	44.29	2	0	0.383	0.295307	5.42	158.5	41.5	13.78	66.08	High	High	High	High	High	Peak Found	1		3	3	Present Both	1	GLYMA_01G055400	GLYMA_01G055400	sp|F4ID16|NU98B_ARATH	Nuclear pore complex protein NUP98B GN=NUP98B	ident:12/185 pos:16/185 query:185 hit:997 align:23 bit:26.2	Partial_match_both	Nuclear pore complex protein NUP98B	Nucleoporin 98B; Nucleoporin autopeptidase	NU98B_ARATH	F4ID16	Q9LQ50	NUP98B	na	Arabidopsis thaliana (Mouse-ear cress)	3702
High	Master Protein	GLYMA_10G174200		0	22.611	25	2	4	2	131	14.5	4.97	11.43	2	0	0.447	0.489635	4.2	137.9	62.1	29.05	1.33	High	Peak Found	High	Peak Found	High	Not Found	1		3	2	Present Both	1	GLYMA_10G174200	GLYMA_10G174200	sp|Q9FZ89|Y1815_ARATH	UPF0426 protein At1g28150, chloroplastic GN=CBSDUF4	ident:52/131 pos:66/131 query:131 hit:123 align:78 bit:107.1	Poor_match	UPF0426 protein At1g28150, chloroplastic	na	Y1815_ARATH	Q9FZ89	Q8LET5	OrderedLocusNames=At1g28150	na	Arabidopsis thaliana (Mouse-ear cress)	3702
High	Master Protein	GLYMA_17G175000		0	21.974	2	4	5	4	2361	256.7	6.2	13.91	4	0	1.605	0.797038	61.16	91.8	108.2	31.56	40.21	High	High	Peak Found	Peak Found	High	Peak Found	1		3	3	Present Both	1	GLYMA_17G175000	GLYMA_17G175000	sp|F4JH53|FDM2_ARATH	Factor of DNA methylation 2 GN=FDM2	ident:32/2361 pos:65/2361 query:2361 hit:635 align:120 bit:47.0	Partial_match_both	Factor of DNA methylation 2	Protein IDN2 PARALOG 2; Protein IDN2-LIKE 2	FDM2_ARATH	F4JH53	O23064	FDM2	na	Arabidopsis thaliana (Mouse-ear cress)	3702
High	Master Protein	GLYMA_07G059400		0	21.962	35	1	4	1	75	8.5	6.54	18.15	1	0	3.128	0.489635	158.49	48.5	151.5	11.62	107.14	High	Peak Found	Not Found	High	Not Found	High	1		2	2	Present Both	1	GLYMA_07G059400	GLYMA_07G059400	sp|Q9FF75|SUN1_ARATH	SUN domain-containing protein 1 GN=SUN1	ident:18/75 pos:29/75 query:75 hit:471 align:56 bit:27.7	Partial_match_hit	SUN domain-containing protein 1 (AtSUN1)	na	SUN1_ARATH	Q9FF75	na	SUN1	na	Arabidopsis thaliana (Mouse-ear cress)	3702
High	Master Protein	GLYMA_09G188800		0	20.572	24	2	7	2	170	15.1	9.16	17.68	2	0	0.792	0.866034	18.84	118.2	81.8	17.75	20.16	High	High	High	High	High	Not Found	1		3	2	Present Both	1	GLYMA_09G188800	GLYMA_09G188800	sp|Q9C522|ACLB1_ARATH	ATP-citrate synthase beta chain protein 1 GN=ACLB-1	ident:18/170 pos:27/170 query:170 hit:608 align:64 bit:27.7	Partial_match_both	ATP-citrate synthase beta chain protein 1 (ATP-citrate synthase B-1)	ATP-citrate lyase B-1; Citrate cleavage enzyme B-1	ACLB1_ARATH	Q9C522	na	ACLB-1	na	Arabidopsis thaliana (Mouse-ear cress)	3702
High	Master Protein	GLYMA_11G122300		0	20.559	37	2	4	2	54	6.2	9.61	9.39	2	0	1.009	0.960306	74.94	99.5	100.5	75.99	44.93	High	Peak Found	Peak Found	High	Peak Found	High	1		3	3	Present Both	1	GLYMA_11G122300	GLYMA_11G122300	sp|Q9XIA7|TOM6_ARATH	Mitochondrial import receptor subunit TOM6 homolog GN=TOM6	ident:36/54 pos:45/54 query:54 hit:54 align:54 bit:86.3	OK	Mitochondrial import receptor subunit TOM6 homolog	Translocase of outer membrane 6 kDa subunit homolog	TOM6_ARATH	Q9XIA7	P83432	TOM6	na	Arabidopsis thaliana (Mouse-ear cress)	3702
High	Master Protein	GLYMA_20G230700		0	20.181	8	3	6	3	564	63.8	5.48	18.52	3	0	0.26	0.145293	1.81	152.4	47.6	28.37		High	High	Peak Found	High	Not Found	Not Found	1		3	1	Only Control	1	GLYMA_20G230700	GLYMA_20G230700	sp|Q9FII7|SMC6B_ARATH	Structural maintenance of chromosomes protein 6B GN=SMC6B	ident:37/564 pos:65/564 query:564 hit:1057 align:126 bit:34.7	Partial_match_both	Structural maintenance of chromosomes protein 6B	DNA repair protein RAD18 (AtRAD18)	SMC6B_ARATH	Q9FII7	Q9S722	SMC6B	MIM	Arabidopsis thaliana (Mouse-ear cress)	3702
High	Master Protein	GLYMA_02G101200		0	15.87	4	2	3	2	536	60.6	5.27	8.74	2	0	0.418	0.365887	6.57	139.3	60.7	15.19	6.82	High	High	Not Found	Peak Found	Peak Found	Not Found	1		2	2	Present Both	1	GLYMA_02G101200	GLYMA_02G101200	sp|O64624|PP163_ARATH	Pentatricopeptide repeat-containing protein At2g18940, chloroplastic GN=TOPP5	ident:26/536 pos:43/536 query:536 hit:822 align:105 bit:32.0	Partial_match_both	Pentatricopeptide repeat-containing protein At2g18940, chloroplastic	na	PP163_ARATH	O64624	na	OrderedLocusNames=At2g18940	na	Arabidopsis thaliana (Mouse-ear cress)	3702
High	Master Protein	GLYMA_10G292100		0	15.2	3	1	2	1	684	77.2	5.06	9.61	1	0	0.01	6.62973e-17		200		5.43		High	High	Not Found	Not Found	Not Found	Not Found	1		2	0	Only Control	1	GLYMA_10G292100	GLYMA_10G292100	sp|Q93ZJ9|MLN51_ARATH	Protein MLN51 homolog GN=MLN51	ident:20/684 pos:27/684 query:684 hit:605 align:63 bit:31.6	Partial_match_both	Protein MLN51 homolog	Protein CASC3 homolog; Protein barentsz (Btz)	MLN51_ARATH	Q93ZJ9	Q9S770	MLN51	na	Arabidopsis thaliana (Mouse-ear cress)	3702
High	Master Protein	GLYMA_19G012900		0	15.2	14	1	2	1	184	19.6	4.65	11.74	1	0	0.01	6.62973e-17		200		33.54		High	High	Peak Found	Not Found	Not Found	Not Found	1		3	0	Only Control	1	GLYMA_19G012900	GLYMA_19G012900	sp|Q5G5E0|PIRL5_ARATH	Plant intracellular Ras-group-related LRR protein 5 GN=PIRL5	ident:18/184 pos:27/184 query:184 hit:526 align:51 bit:29.3	Partial_match_both	Plant intracellular Ras-group-related LRR protein 5	na	PIRL5_ARATH	Q5G5E0	na	PIRL5	na	Arabidopsis thaliana (Mouse-ear cress)	3702
High	Master Protein	GLYMA_19G154700		0	14.394	27	1	3	1	78	8	4.53	12.15	1	0	0.895	0.939369	28.99	105.5	94.5	33.54		High	High	Not Found	High	Not Found	Not Found	1		2	1	Only Control	1	GLYMA_19G154700	GLYMA_19G154700	sp|Q9SVC4|OEP7_ARATH	Outer envelope membrane protein 7 GN=OEP7	ident:33/78 pos:38/78 query:78 hit:64 align:50 bit:66.2	Poor_match	Outer envelope membrane protein 7 (AtOEP7)	na	OEP7_ARATH	Q9SVC4	na	OEP7	na	Arabidopsis thaliana (Mouse-ear cress)	3702
High	Master Protein	GLYMA_13G338500		0	14.284	10	2	5	2	165	17.9	9.8	11.54	2	0	0.951	0.960306	31.43	98.5	101.5	35.07	11.36	High	High	Not Found	High	High	Not Found	1		2	2	Present Both	1	GLYMA_13G338500	GLYMA_13G338500	sp|Q9FN52|MAM3_ARATH	Methylthioalkylmalate synthase 3, chloroplastic GN=MAM3	ident:17/165 pos:22/165 query:165 hit:503 align:46 bit:27.7	Partial_match_both	Methylthioalkylmalate synthase 3, chloroplastic	2-isopropylmalate synthase 2; Methylthioalkylmalate synthase-like	MAM3_ARATH	Q9FN52	Q70YR5; Q70YR9; Q70YS1; Q70YS3; Q8VX05; Q8VX46; Q9C5X5	MAM3	IMS2; IPMS_AT1; MAM-L; MAM1	Arabidopsis thaliana (Mouse-ear cress)	3702
High	Master Protein	GLYMA_11G108700		0	13.426	10	2	8	2	255	27.1	6.8	19.99	2	0	0.597	0.678119	36.25	140.9	59.1	7.87	35.47	High	High	High	High	High	High	1		3	3	Present Both	1	GLYMA_11G108700	GLYMA_11G108700	sp|Q8RWM2|NPRT1_ARATH	Nicotinate phosphoribosyltransferase 1 GN=NAPRT1	ident:41/255 pos:70/255 query:255 hit:559 align:178 bit:33.1	Partial_match_hit	Nicotinate phosphoribosyltransferase 1 (NAPRTase)	na	NPRT1_ARATH	Q8RWM2	O23191	NAPRT1	na	Arabidopsis thaliana (Mouse-ear cress)	3702
High	Master Protein	GLYMA_10G075000		0	13.177	15	3	10	3	189	20.2	9.22	26.49	3	0	0.709	0.807539	15.49	111.1	88.9	24.13	7.21	High	High	High	High	High	Not Found	1		3	2	Present Both	1	GLYMA_10G075000	GLYMA_10G075000	sp|Q9FZC6|FOX3_ARATH	Berberine bridge enzyme-like 5 GN=FOX3	ident:16/189 pos:25/189 query:189 hit:527 align:48 bit:28.9	Partial_match_both	Berberine bridge enzyme-like 5 (AtBBE-like 5)	Flavin-dependent oxidoreductase FOX3	FOX3_ARATH	Q9FZC6	na	FOX3	na	Arabidopsis thaliana (Mouse-ear cress)	3702
High	Master Protein	GLYMA_01G003700		0	12.953	14	3	6	3	303	34.3	6.79	9.3	3	0	0.996	0.984726	112.22	77.2	122.8	69.13	66.28	High	High	Not Found	High	High	Not Found	1		2	2	Present Both	1	GLYMA_01G003700	GLYMA_01G003700	sp|Q9LVT4|DRL37_ARATH	Probable disease resistance protein At5g47250 GN=DRT111	ident:31/303 pos:59/303 query:303 hit:843 align:135 bit:35.0	Partial_match_both	Probable disease resistance protein At5g47250	na	DRL37_ARATH	Q9LVT4	Q0WVJ2	OrderedLocusNames=At5g47250	na	Arabidopsis thaliana (Mouse-ear cress)	3702
High	Master Protein	GLYMA_20G199500		0	12.872	21	2	7	2	120	13	9.11	17.5	2	0	1.967	0.608765	85.17	61.5	138.5	46.18	65.26	High	High	Not Found	High	High	High	1		2	3	Present Both	1	GLYMA_20G199500	GLYMA_20G199500	sp|Q9ZT94|POLR2_ARATH	Retrovirus-related Pol polyprotein from transposon RE2 GN=RE2	ident:31/120 pos:47/120 query:120 hit:1456 align:112 bit:30.0	Partial_match_hit	Endonuclease RE2	Retro element 2 (AtRE2)	POLR2_ARATH	Q9ZT94	J7MCQ0; Q9SXQ2	RE2	na	Arabidopsis thaliana (Mouse-ear cress)	3702
High	Master Protein	GLYMA_07G147100		0	12.825	12	1	5	1	142	15.3	6.8	16.41	1	0	1.079	0.998965	171.08	96.2	103.8	9.13	109.77	High	High	Not Found	High	High	High	1		2	3	Present Both	1	GLYMA_07G147100	GLYMA_07G147100	sp|Q07356|PDS_ARATH	15-cis-phytoene desaturase, chloroplastic/chromoplastic GN=PDS	ident:26/142 pos:42/142 query:142 hit:566 align:97 bit:30.8	Partial_match_hit	15-cis-phytoene desaturase, chloroplastic/chromoplastic	Phytoene dehydrogenase; Phytoene desaturase	PDS_ARATH	Q07356	F4JUN0	PDS	na	Arabidopsis thaliana (Mouse-ear cress)	3702
High	Master Protein	GLYMA_16G054600		0	12.416	25	3	3	3	77	8.7	9.7	7	3	0	2.455	0.647156	70.35	57.9	142.1	8.68	63.71	High	Peak Found	Not Found	High	Not Found	High	1		2	2	Present Both	1	GLYMA_16G054600	GLYMA_16G054600	sp|Q9LZA6|SDP1_ARATH	Triacylglycerol lipase SDP1 GN=SDP1	ident:24/77 pos:38/77 query:77 hit:825 align:72 bit:26.2	Partial_match_hit	Triacylglycerol lipase SDP1	Protein SUGAR-DEPENDENT 1	SDP1_ARATH	Q9LZA6	Q56WV8	SDP1	na	Arabidopsis thaliana (Mouse-ear cress)	3702
High	Master Protein	GLYMA_07G088700.6.p		0	10.835	45	3	4	3	84	10.2	9.44	10.31	3	0	1.513	0.851856	99.28	61.8	138.2	36.86	59.71	High	Peak Found	Not Found	High	Peak Found	High	1		2	3	Present Both	1	GLYMA_07G088700.6.p	GLYMA_07G088700.6.p	sp|Q9SEV0|BAN_ARATH	Anthocyanidin reductase GN=BAN	ident:21/84 pos:33/84 query:84 hit:340 align:67 bit:28.9	Partial_match_hit	Anthocyanidin reductase (AtANR)	Anthocyanin spotted testa (ast); Protein BANYULS	BAN_ARATH	Q9SEV0	Q1PFH9; Q680A7; Q9SYA8	BAN	ANR	Arabidopsis thaliana (Mouse-ear cress)	3702
High	Master Protein	GLYMA_08G193800		0	10.671	12	2	5	2	171	19.1	9.58	16.57	2	0	0.956	0.970588	50.08	102.2	97.8	18.09	54.8	High	High	Not Found	High	High	Not Found	1		2	2	Present Both	1	GLYMA_08G193800	GLYMA_08G193800	sp|Q8LBL1|KCO1_ARATH	Two-pore potassium channel 1 GN=TPK1	ident:13/171 pos:24/171 query:171 hit:363 align:42 bit:28.1	Partial_match_both	Two-pore potassium channel 1 (AtTPK1)	Calcium-activated outward-rectifying potassium channel 1 (AtKCO1)	KCO1_ARATH	Q8LBL1	O04718; Q0WNY4; Q9FM75	TPK1	KCO1	Arabidopsis thaliana (Mouse-ear cress)	3702
High	Master Protein	GLYMA_04G055400		0	9.789	6	1	3	1	215	23.8	4.96	9.89	1	0	0.614	0.73785	23.31	128.9	71.1	18.33	59.56	High	High	Peak Found	High	Peak Found	Not Found	1		3	2	Present Both	1	GLYMA_04G055400	GLYMA_04G055400	sp|Q84VQ4|NDHU_ARATH	NAD(P)H-quinone oxidoreductase subunit U, chloroplastic GN=ndhU	ident:102/215 pos:134/215 query:215 hit:218 align:194 bit:191.0	Poor_match	NAD(P)H-quinone oxidoreductase subunit U, chloroplastic	NAD(P)H dehydrogenase subunit U (NDH subunit U); NADH-plastoquinone oxidoreductase subunit U; Protein CHLORORESPIRATORY REDUCTION L	NDHU_ARATH	Q84VQ4	Q63Z93	ndhU	na	Arabidopsis thaliana (Mouse-ear cress)	3702
High	Master Protein	GLYMA_08G114200		0	7.577	2	1	4	1	575	66.5	8.19	9.14	1	0	1.835	0.797038	62.1	70.5	129.5	38.74	68.61	High	High	Not Found	Not Found	High	High	1		2	2	Present Both	1	GLYMA_08G114200	GLYMA_08G114200	sp|Q8S9K3|VAR3_ARATH	Zinc finger protein VAR3, chloroplastic GN=VAR3	ident:20/575 pos:28/575 query:575 hit:758 align:60 bit:34.3	Partial_match_both	Zinc finger protein VAR3, chloroplastic	Organelle Zinc finger 1; Protein VARIEGATED 3	VAR3_ARATH	Q8S9K3	Q64M74; Q9FN73	VAR3	na	Arabidopsis thaliana (Mouse-ear cress)	3702
High	Master Protein	GLYMA_09G009400		0	7.094	6	1	6	1	202	22.3	5.73	18.66	1	0	0.519	0.592545	5.72	132.5	67.5	11.02	48.68	High	High	Not Found	High	High	High	1		2	3	Present Both	1	GLYMA_09G009400	GLYMA_09G009400	sp|Q42578|PER53_ARATH	Peroxidase 53 GN=PER53	ident:15/202 pos:19/202 query:202 hit:335 align:41 bit:31.6	Partial_match_both	Peroxidase 53 (Atperox P53)	ATPA2	PER53_ARATH	Q42578	na	PER53	P53	Arabidopsis thaliana (Mouse-ear cress)	3702
High	Master Protein	GLYMA_U012400		0	6.985	4	1	4	1	285	32.4	6.35	11.96	1	0	0.616	0.733285	47.41	123.8	76.2	7.71	94.1	High	High	Not Found	Peak Found	High	Not Found	1		2	2	Present Both	1	GLYMA_U012400	GLYMA_U012400	sp|F4J1U4|KN12E_ARATH	Kinesin-like protein KIN-12E GN=KIN12E	ident:29/285 pos:37/285 query:285 hit:1263 align:79 bit:33.5	Partial_match_both	Kinesin-like protein KIN-12E	na	KN12E_ARATH	F4J1U4	Q9LXV6	KIN12E	na	Arabidopsis thaliana (Mouse-ear cress)	3702
High	Master Protein	GLYMA_20G070600		0	5.697	2	3	8	3	1296	134.5	8.78	16.22	3	0	0.811	0.880203	32.97	86.2	113.8	50.64	73	High	High	Peak Found	High	High	Peak Found	1		3	3	Present Both	1	GLYMA_20G070600	GLYMA_20G070600	sp|Q9CAF4|NUP1_ARATH	Nuclear pore complex protein NUP1 GN=NUP1	ident:268/1296 pos:352/1296 query:1296 hit:1309 align:641 bit:364.4	Partial_match_both	Nuclear pore complex protein NUP1	Nuclear pore complex protein NUP136; Nucleoporin 1; Nucleoporin 136	NUP1_ARATH	Q9CAF4	Q9LPN4	NUP1	na	Arabidopsis thaliana (Mouse-ear cress)	3702
High	Master Protein	GLYMA_02G223300		0	5.105	2	1	4	1	569	64.9	5.34	8.77	1	0	0.753	0.85341	31.93	129.2	70.8	46.02	34.45	High	High	Peak Found	High	High	Peak Found	1		3	3	Present Both	1	GLYMA_02G223300	GLYMA_02G223300	sp|Q8S9K3|VAR3_ARATH	Zinc finger protein VAR3, chloroplastic GN=VAR3	ident:18/569 pos:28/569 query:569 hit:758 align:60 bit:30.8	Partial_match_both	Zinc finger protein VAR3, chloroplastic	Organelle Zinc finger 1; Protein VARIEGATED 3	VAR3_ARATH	Q8S9K3	Q64M74; Q9FN73	VAR3	na	Arabidopsis thaliana (Mouse-ear cress)	3702
High	Master Protein	GLYMA_12G207700		0	4.745	7	1	2	1	200	21.3	10.64	6.11	1	0	0.417	0.536656	1.32	141.1	58.9	7.23		High	High	Not Found	Peak Found	Not Found	Not Found	1		2	1	Only Control	1	GLYMA_12G207700	GLYMA_12G207700	No_match	nan	nan	No_match	na	na	na	na	na	na	na	na	na
High	Master Protein	GLYMA_12G091900		0	4.547	5	2	4	2	329	37.5	8.1	9.13	2	0	0.625	0.715256	40.76	119.8	80.2	20.9	87.89	High	Peak Found	High	Peak Found	High	Not Found	1		3	2	Present Both	1	GLYMA_12G091900	GLYMA_12G091900	sp|O82279|CG160_ARATH	Protein CONSERVED ONLY IN THE GREEN LINEAGE 160, chloroplastic GN=CGL160	ident:38/329 pos:68/329 query:329 hit:350 align:164 bit:47.0	Partial_match_both	Protein CONSERVED ONLY IN THE GREEN LINEAGE 160, chloroplastic (AtCGL160)	na	CG160_ARATH	O82279	A0A097PRF7; Q8LB58	CGL160	na	Arabidopsis thaliana (Mouse-ear cress)	3702
High	Master Protein	GLYMA_14G190100		0	4.329	2	1	4	1	569	64.7	5.39	11.65	1	0	0.01	6.62973e-17		200		9.05		High	High	Not Found	Not Found	Not Found	Not Found	1		2	0	Only Control	1	GLYMA_14G190100	GLYMA_14G190100	sp|Q8S9K3|VAR3_ARATH	Zinc finger protein VAR3, chloroplastic GN=VAR3	ident:17/569 pos:28/569 query:569 hit:758 align:60 bit:30.0	Partial_match_both	Zinc finger protein VAR3, chloroplastic	Organelle Zinc finger 1; Protein VARIEGATED 3	VAR3_ARATH	Q8S9K3	Q64M74; Q9FN73	VAR3	na	Arabidopsis thaliana (Mouse-ear cress)	3702
High	Master Protein	GLYMA_06G253800		0	4.03	8	1	2	1	133	15	9.82	5.53	1	0	0.374	0.42593	2.34	145.6	54.4	15.89		High	High	Not Found	Peak Found	Not Found	Not Found	1		2	1	Only Control	1	GLYMA_06G253800	GLYMA_06G253800	sp|O48842|GT12_ARATH	Probable xyloglucan galactosyltransferase GT12 GN=GT12	ident:17/133 pos:37/133 query:133 hit:509 align:69 bit:30.0	Partial_match_hit	Probable xyloglucan galactosyltransferase GT12	Glycosyltransferase 12 (AtGT12)	GT12_ARATH	O48842	na	GT12	na	Arabidopsis thaliana (Mouse-ear cress)	3702
High	Master Protein	GLYMA_03G077300		0	4.004	3	1	5	1	248	27.6	5.02	12.26	1	0	0.913	0.952604	44.48	106.7	93.3	15.21	49.75	High	High	High	High	High	Not Found	1		3	2	Present Both	1	GLYMA_03G077300	GLYMA_03G077300	sp|Q9SR32|U161_ARATH	UPF0161 protein At3g09310 GN=XRCC3	ident:22/248 pos:38/248 query:248 hit:170 align:83 bit:32.3	Partial_match_both	UPF0161 protein At3g09310	na	U161_ARATH	Q9SR32	Q24JL6	OrderedLocusNames=At3g09310	na	Arabidopsis thaliana (Mouse-ear cress)	3702
High	Master Protein	GLYMA_13G054800		0	3.849	12	1	1	1	104	11.5	8.84	2.03	1	0	0.197	0.0493183	8.38	167.1	32.9	116.73		High	Peak Found	Not Found	Peak Found	Not Found	Not Found	1		2	1	Only Control	1	GLYMA_13G054800	GLYMA_13G054800	sp|Q9SCJ9|UBP26_ARATH	Ubiquitin carboxyl-terminal hydrolase 26 GN=UBP26	ident:12/104 pos:12/104 query:104 hit:1067 align:20 bit:26.2	Partial_match_both	Ubiquitin carboxyl-terminal hydrolase 26	Deubiquitinating enzyme 26 (AtUBP26); Ubiquitin thioesterase 26; Ubiquitin-specific-processing protease 26	UBP26_ARATH	Q9SCJ9	Q9FPS1	UBP26	SUP32	Arabidopsis thaliana (Mouse-ear cress)	3702
High	Master Protein	GLYMA_03G210600		0	3.71	12	1	3	1	84	9.6	9.19	6.58	1	0	0.777	0.873737	4.42	112.6	87.4	7.09	7.33	High	High	Not Found	High	Peak Found	Not Found	1		2	2	Present Both	1	GLYMA_03G210600	GLYMA_03G210600	sp|O81316|SCL6_ARATH	Scarecrow-like protein 6 GN=SCL6	ident:10/84 pos:19/84 query:84 hit:558 align:31 bit:26.2	Partial_match_both	Scarecrow-like protein 6 (AtSCL6)	GRAS family protein 22 (AtGRAS-22); SCL6-IV	SCL6_ARATH	O81316	B2CV54; Q9SYQ4	SCL6	na	Arabidopsis thaliana (Mouse-ear cress)	3702
High	Master Protein	GLYMA_05G129800		0	3.467	11	1	5	1	95	10.6	8.79	8.21	1	0	1.344	0.906527	10.54	85.6	114.4	13.06	9.32	High	High	High	High	High	Not Found	1		3	2	Present Both	1	GLYMA_05G129800.3.p	GLYMA_05G129800.3.p	sp|Q8S9J0|TAUE4_ARATH	Sulfite exporter TauE/SafE family protein 4 GN=RSH2	ident:15/95 pos:22/95 query:95 hit:459 align:41 bit:27.3	Partial_match_both	Sulfite exporter TauE/SafE family protein 4	na	TAUE4_ARATH	Q8S9J0	Q9ZQB0	OrderedLocusNames=At2g36630	na	Arabidopsis thaliana (Mouse-ear cress)	3702
High	Master Protein	GLYMA_08G290000		0	3.177	13	1	4	1	84	9.9	8.47	6.09	1	0	0.777	0.861974	22.71	112.6	87.4	30.73		High	High	Peak Found	High	High	Not Found	1		3	2	Present Both	1	GLYMA_08G290000	GLYMA_08G290000	sp|F4JVJ1|CLPB2_ARATH	Putative chaperone protein ClpB2, chloroplastic GN=CLPB2	ident:13/84 pos:25/84 query:84 hit:623 align:44 bit:27.7	Partial_match_both	Putative chaperone protein ClpB2, chloroplastic	ATP-dependent Clp protease ATP-binding subunit ClpB homolog 2; Casein lytic proteinase B2	CLPB2_ARATH	F4JVJ1	O23323	CLPB2	CLPB4	Arabidopsis thaliana (Mouse-ear cress)	3702
High	Master Protein	GLYMA_03G116800		0.004	2.057	10	1	2	1	123	14.6	7.58	7.11	1	0	0.956	0.972386	45.05	103.5	96.5	27.47	45.64	High	Peak Found	Peak Found	Peak Found	High	Not Found	1		3	2	Present Both	1	GLYMA_03G116800	GLYMA_03G116800	sp|O23144|PPI1_ARATH	Proton pump-interactor 1 GN=PPI1	ident:19/123 pos:40/123 query:123 hit:612 align:59 bit:40.8	Partial_match_both	Proton pump-interactor 1	na	PPI1_ARATH	O23144	B9DFB6; Q9SZS5	PPI1	na	Arabidopsis thaliana (Mouse-ear cress)	3702
Medium	Master Protein	GLYMA_02G291800		0.014	1.589	4	1	3	1	351	38.7	8.69	7.99	1	0	1.309	0.992627	40.43	86.6	113.4	16.48	38.69	High	High	Not Found	High	Peak Found	Peak Found	1		2	3	Present Both	1	GLYMA_02G291800	GLYMA_02G291800	sp|O49286|SKP2B_ARATH	F-box protein SKP2B GN=SKP2B	ident:30/351 pos:51/351 query:351 hit:360 align:101 bit:42.7	Partial_match_both	F-box protein SKP2B	F-box/LRR-repeat protein 5 (AtFB5); SKP2-like protein 2 (AtSKP2;2)	SKP2B_ARATH	O49286	Q680E2; Q8GY48	SKP2B	FBL5	Arabidopsis thaliana (Mouse-ear cress)	3702
Medium	Master Protein	GLYMA_06G246700		0.016	1.421	17	1	1	1	60	6.6	5.26	0	1	0	0.749	0.852675	5.41	114.3	85.7	9.17		High	Peak Found	Not Found	Peak Found	Not Found	Not Found	1		2	1	Only Control	1	GLYMA_06G246700	GLYMA_06G246700	sp|Q9LSL9|PP445_ARATH	Pentatricopeptide repeat-containing protein At5g65560 GN=PCMP-E1	ident:7/60 pos:10/60 query:60 hit:915 align:12 bit:24.6	Partial_match_both	Pentatricopeptide repeat-containing protein At5g65560	na	PP445_ARATH	Q9LSL9	na	OrderedLocusNames=At5g65560	na	Arabidopsis thaliana (Mouse-ear cress)	3702
High	Master Protein	GLYMA_12G199400	1.10.9.1 - Plastoquinol--plastocyanin reductase / Cytochrome b6f complex (1 of 2)	0	144.35	44	10	50	4	227	24.2	8.37	204.24	10	5	0.631	0.725629	15.65	127.3	72.7	10.36	84.6	High	High	High	High	High	Not Found	1		3	2	Present Both	1	GLYMA_12G199400	GLYMA_12G199400	sp|Q9ZR03|UCRIA_ARATH	Cytochrome b6-f complex iron-sulfur subunit, chloroplastic GN=petC	ident:171/227 pos:194/227 query:227 hit:229 align:231 bit:313.2	OK	Cytochrome b6-f complex iron-sulfur subunit, chloroplastic	Plastohydroquinone:plastocyanin oxidoreductase iron-sulfur protein; Proton gradient regulation protein 1; Rieske iron-sulfur protein (ISP; RISP)	UCRIA_ARATH	Q9ZR03	Q94EI4; Q9FYB6	petC	PGR1	Arabidopsis thaliana (Mouse-ear cress)	3702
High	Master Protein	GLYMA_13G302900	1.10.9.1 - Plastoquinol--plastocyanin reductase / Cytochrome b6f complex (1 of 2)	0	113.139	44	9	41	3	227	24.2	8.37	150.69	9	0	0.474	0.496429	14.19	141.7	58.3	16.6	51.19	High	High	High	High	High	Not Found	1		3	2	Present Both	1	GLYMA_13G302900	GLYMA_13G302900	sp|Q9ZR03|UCRIA_ARATH	Cytochrome b6-f complex iron-sulfur subunit, chloroplastic GN=petC	ident:172/227 pos:194/227 query:227 hit:229 align:231 bit:313.9	OK	Cytochrome b6-f complex iron-sulfur subunit, chloroplastic	Plastohydroquinone:plastocyanin oxidoreductase iron-sulfur protein; Proton gradient regulation protein 1; Rieske iron-sulfur protein (ISP; RISP)	UCRIA_ARATH	Q9ZR03	Q94EI4; Q9FYB6	petC	PGR1	Arabidopsis thaliana (Mouse-ear cress)	3702
High	Master Protein	GLYMA_07G034800	1.13.11.12//1.13.11.58 - Linoleate 13S-lipoxygenase / Lipoxidase // Linoleate 9S-lipoxygenase / Linoleate 9-lipoxygenase (1 of 3)	0	310.248	32	28	124	21	865	96.3	7.02	401.14	28	2	0.655	0.752862	27.43	123.7	76.3	16.53	32.97	High	High	High	High	High	High	1	Acetyl [N-Term]	3	3	Present Both	1	GLYMA_07G034800	GLYMA_07G034800	sp|Q06327|LOX1_ARATH	Linoleate 9S-lipoxygenase 1 GN=LOX1	ident:500/865 pos:638/865 query:865 hit:859 align:886 bit:1008.4	OK	Linoleate 9S-lipoxygenase 1	Lipoxygenase 1 (AtLOX1)	LOX1_ARATH	Q06327	Q9FZ30	LOX1	na	Arabidopsis thaliana (Mouse-ear cress)	3702
High	Master Protein	GLYMA_07G034900	1.13.11.12//1.13.11.58 - Linoleate 13S-lipoxygenase / Lipoxidase // Linoleate 9S-lipoxygenase / Linoleate 9-lipoxygenase (1 of 3)	0	90.751	12	7	27	5	868	97.8	6.52	79.58	7	0	1.081	0.981868	59.31	103.8	96.2	21.77	50.11	High	High	Peak Found	High	High	High	1		3	3	Present Both	1	GLYMA_07G034900	GLYMA_07G034900	sp|Q06327|LOX1_ARATH	Linoleate 9S-lipoxygenase 1 GN=LOX1	ident:488/868 pos:629/868 query:868 hit:859 align:870 bit:990.3	OK	Linoleate 9S-lipoxygenase 1	Lipoxygenase 1 (AtLOX1)	LOX1_ARATH	Q06327	Q9FZ30	LOX1	na	Arabidopsis thaliana (Mouse-ear cress)	3702
High	Master Protein	GLYMA_13G078400	1.14.13.122 - Chlorophyllide-a oxygenase / Cholorophyll-b synthase (1 of 4)	0	23.054	6	3	7	3	532	60.4	7.74	21.42	3	0	0.579	0.657889	2.76	155.5	44.5	23.67		High	High	High	Not Found	Peak Found	Not Found	1		3	1	Only Control	1	GLYMA_13G078400	GLYMA_13G078400	sp|Q9MBA1|CAO_ARATH	Chlorophyllide a oxygenase, chloroplastic GN=CAO	ident:407/532 pos:466/532 query:532 hit:536 align:532 bit:836.6	OK	Chlorophyllide a oxygenase, chloroplastic (Chlorophyll a oxygenase)	Chlorophyll b synthase (AtCAO)	CAO_ARATH	Q9MBA1	Q0WQP6; Q3ECX2; Q3ECX3; Q9SPF2; Q9XJ37	CAO	CHL	Arabidopsis thaliana (Mouse-ear cress)	3702
High	Master Protein	GLYMA_07G039800	1.14.13.21 - Flavonoid 3'-monooxygenase / Flavonoid 3'-hydroxylase (1 of 19)	0	7.496	4	2	4	2	516	59	8.65	7.07	2	0	1.489	0.840112	103.27	72.2	127.8	30.82	92.73	High	High	Peak Found	Peak Found	Peak Found	High	1		3	3	Present Both	1	GLYMA_07G039800	GLYMA_07G039800	sp|Q9SD85|F3PH_ARATH	Flavonoid 3'-monooxygenase GN=CYP75B1	ident:215/516 pos:307/516 query:516 hit:513 align:511 bit:424.1	Poor_match	Flavonoid 3'-monooxygenase	Cytochrome P450 75B1; Flavonoid 3'-hydroxylase (AtF3'H); Protein TRANSPARENT TESTA 7	F3PH_ARATH	Q9SD85	na	CYP75B1	F3'H; TT7	Arabidopsis thaliana (Mouse-ear cress)	3702
High	Master Protein	GLYMA_03G119500	1.14.13.81 - Magnesium-protoporphyrin IX monomethyl ester (oxidative) cyclase / Mg-protoporphyrin IX monomethyl ester oxidative cyclase (1 of 2)	0	62.028	13	6	28	6	424	49	8.22	84.94	6	0	0.563	0.626933	11.73	129.5	70.5	35.21	35.34	High	High	High	High	High	Not Found	1		3	2	Present Both	1	GLYMA_03G119500	GLYMA_03G119500	sp|Q9M591|CRD1_ARATH	Magnesium-protoporphyrin IX monomethyl ester [oxidative] cyclase, chloroplastic GN=CRD1	ident:344/424 pos:367/424 query:424 hit:409 align:405 bit:690.6	OK	Magnesium-protoporphyrin IX monomethyl ester [oxidative] cyclase, chloroplastic (Mg-protoporphyrin IX monomethyl ester oxidative cyclase)	Copper response defect 1 protein; Dicarboxylate diiron protein (AtZIP); MPE-cyclase	CRD1_ARATH	Q9M591	O04051; Q38892; Q8GUS3; Q9M1K4	CRD1	ACSF; AT103; CHL27; ZIP	Arabidopsis thaliana (Mouse-ear cress)	3702
High	Master Protein	GLYMA_19G147400	1.14.19.6 - Delta(12)-fatty-acid desaturase / Oleoyl-CoA Delta(12) desaturase (1 of 2)	0	4.956	4	2	5	2	383	43.8	8.46	9.47	2	0	0.312	0.258242	9.64	125.6	74.4	32.93	134.02	High	High	High	Peak Found	Peak Found	Peak Found	1		3	3	Present Both	1	GLYMA_19G147400	GLYMA_19G147400	sp|P46313|FAD6E_ARATH	Delta(12)-fatty-acid desaturase GN=FAD2	ident:296/383 pos:337/383 query:383 hit:383 align:383 bit:638.3	OK	Delta(12)-fatty-acid desaturase	Omega-6 fatty acid desaturase, endoplasmic reticulum	FAD6E_ARATH	P46313	na	FAD2	na	Arabidopsis thaliana (Mouse-ear cress)	3702
High	Master Protein	GLYMA_03G056700	1.14.99.33 - Delta(12)-fatty acid dehydrogenase / Linoleate Delta-12-fatty acid acetylenase (desaturase) (1 of 5)	0	28.663	3	2	8	2	453	51.3	7.71	24.43	2	0	0.347	0.270223	3.96	159.7	40.3	10.71	45.45	High	High	High	High	High	Not Found	1		3	2	Present Both	1	GLYMA_03G056700	GLYMA_03G056700	sp|P48622|FAD3D_ARATH	Temperature-sensitive sn-2 acyl-lipid omega-3 desaturase (ferredoxin), chloroplastic GN=FAD8	ident:320/453 pos:363/453 query:453 hit:435 align:451 bit:674.9	OK	Temperature-sensitive sn-2 acyl-lipid omega-3 desaturase (ferredoxin), chloroplastic	Temperature-sensitive omega-3 fatty acid desaturase 8, chloroplastic	FAD3D_ARATH	P48622	na	FAD8	na	Arabidopsis thaliana (Mouse-ear cress)	3702
High	Master Protein	GLYMA_11G103500	1.3.1.72 - Delta(24)-sterol reductase / Lanosterol Delta(24)-reductase (1 of 2)	0	121.555	18	10	44	2	567	66	8.21	124.64	10	11	1.173	0.952604	118.38	93.2	106.8	15.62	122.82	High	High	High	High	High	High	1		3	3	Present Both	1	GLYMA_11G103500	GLYMA_11G103500	sp|Q39085|DIM_ARATH	Delta(24)-sterol reductase GN=DIM	ident:475/567 pos:510/567 query:567 hit:561 align:564 bit:992.6	OK	Delta(24)-sterol reductase	Cell elongation protein DIMINUTO; Cell elongation protein Dwarf1; Protein CABBAGE1; Protein ENHANCED VERY-LOW-FLUENCE RESPONSE 1	DIM_ARATH	Q39085	Q0WWL4; Q38808; Q8RXF4	DIM	CBB1; DWF1; EVE1	Arabidopsis thaliana (Mouse-ear cress)	3702
High	Master Protein	GLYMA_12G028300	1.3.1.72 - Delta(24)-sterol reductase / Lanosterol Delta(24)-reductase (1 of 2)	0	113.844	18	10	46	2	567	66	8.22	126.66	10	0	0.61	0.693476	16	124.2	75.8	12.58	89.42	High	High	High	High	High	High	1		3	3	Present Both	1	GLYMA_12G028300	GLYMA_12G028300	sp|Q39085|DIM_ARATH	Delta(24)-sterol reductase GN=DIM	ident:480/567 pos:511/567 query:567 hit:561 align:564 bit:999.2	OK	Delta(24)-sterol reductase	Cell elongation protein DIMINUTO; Cell elongation protein Dwarf1; Protein CABBAGE1; Protein ENHANCED VERY-LOW-FLUENCE RESPONSE 1	DIM_ARATH	Q39085	Q0WWL4; Q38808; Q8RXF4	DIM	CBB1; DWF1; EVE1	Arabidopsis thaliana (Mouse-ear cress)	3702
High	Master Protein	GLYMA_05G026200	1.3.1.83 - Geranylgeranyl diphosphate reductase / Geranylgeranyl reductase (1 of 3)	0	194.894	36	18	70	18	462	51.3	9.03	227.26	18	0	0.683	0.792914	26.65	131.7	68.3	25.4	74.49	High	High	High	High	High	Peak Found	1		3	3	Present Both	1	GLYMA_05G026200	GLYMA_05G026200	sp|Q9CA67|CHLP_ARATH	Geranylgeranyl diphosphate reductase, chloroplastic GN=CHLP	ident:379/462 pos:420/462 query:462 hit:467 align:465 bit:769.6	OK	Geranylgeranyl diphosphate reductase, chloroplastic	Geranylgeranyl reductase	CHLP_ARATH	Q9CA67	B9DHM2; O49594; Q56YY5; Q8H170	CHLP	na	Arabidopsis thaliana (Mouse-ear cress)	3702
High	Master Protein	GLYMA_04G179700	1.3.5.1 - Succinate dehydrogenase (quinone) / Succinic dehydrogenase (1 of 9)	0	40.558	35	4	18	4	95	10.9	9.94	43.01	4	0	1.398	0.854204	28.64	51.8	148.2	43.9	67.69	High	High	High	High	High	High	1		3	3	Present Both	1	GLYMA_04G179700	GLYMA_04G179700	sp|Q3E870|SDH7B_ARATH	Succinate dehydrogenase subunit 7B, mitochondrial GN=SDH7B	ident:62/95 pos:74/95 query:95 hit:100 align:93 bit:113.2	OK	Succinate dehydrogenase subunit 7B, mitochondrial	na	SDH7B_ARATH	Q3E870	Q8LBU0	SDH7B	na	Arabidopsis thaliana (Mouse-ear cress)	3702
High	Master Protein	GLYMA_20G018300.5.p	1.3.5.1 - Succinate dehydrogenase (quinone) / Succinic dehydrogenase (1 of 9)	0	10.21	35	4	8	4	141	15.8	7.56	12.07	4	0	0.754	0.85341	37.39	107.6	92.4	28.99	123.62	High	High	Peak Found	High	High	High	1		3	3	Present Both	1	GLYMA_20G018300.5.p	GLYMA_20G018300.5.p	sp|Q941A6|SDH6_ARATH	Succinate dehydrogenase subunit 6, mitochondrial GN=SDH6	ident:92/141 pos:111/141 query:141 hit:142 align:130 bit:207.6	OK	Succinate dehydrogenase subunit 6, mitochondrial	na	SDH6_ARATH	Q941A6	na	SDH6	na	Arabidopsis thaliana (Mouse-ear cress)	3702
High	Master Protein	GLYMA_19G080600	1.3.5.1//1.3.99.1 - Succinate dehydrogenase (quinone) / Succinic dehydrogenase (1 of 1)	0	83.63	39	11	47	6	277	31.1	8.62	109.22	11	5	2.394	0.443697	59.81	59.6	140.4	43.97	37.39	High	High	High	High	High	High	1		3	3	Present Both	1	GLYMA_19G080600	GLYMA_19G080600	sp|Q8LB02|SDHB2_ARATH	Succinate dehydrogenase [ubiquinone] iron-sulfur subunit 2, mitochondrial GN=SDH2-2	ident:220/277 pos:238/277 query:277 hit:280 align:277 bit:455.3	OK	Succinate dehydrogenase [ubiquinone] iron-sulfur subunit 2, mitochondrial	Iron-sulfur subunit of complex II (Ip)	SDHB2_ARATH	Q8LB02	Q9FM32; Q9G3L9	SDH2-2	na	Arabidopsis thaliana (Mouse-ear cress)	3702
High	Master Protein	GLYMA_05G134900	1.6.5.3 - NADH:ubiquinone reductase (H(+)-translocating) / Ubiquinone reductase (1 of 59)	0	180.569	56	5	76	5	108	12.3	7.34	354.51	5	0	1.692	0.732224	67.79	69.5	130.5	24.36	36.58	High	High	High	High	High	High	1		3	3	Present Both	1	GLYMA_05G134900	GLYMA_05G134900	sp|F4I460|MYO8_ARATH	Myosin-8 GN=XI-B	ident:16/108 pos:27/108 query:108 hit:1500 align:51 bit:28.1	Partial_match_both	Myosin-8	Myosin XI B (AtXIB)	MYO8_ARATH	F4I460	O64491	XI-B	XIB	Arabidopsis thaliana (Mouse-ear cress)	3702
High	Master Protein	GLYMA_07G130200	1.6.5.3 - NADH:ubiquinone reductase (H(+)-translocating) / Ubiquinone reductase (1 of 59)	0	22.407	51	4	11	4	75	8.7	8.53	27.28	4	0	1.755	0.699835	94.8	77.7	122.3	68.45	98.33	High	High	Peak Found	High	High	High	1		3	3	Present Both	1	GLYMA_07G130200	GLYMA_07G130200	sp|Q9FJ87|DTX50_ARATH	Protein DETOXIFICATION 50 GN=DTX50	ident:13/75 pos:18/75 query:75 hit:505 align:34 bit:26.2	Partial_match_both	Protein DETOXIFICATION 50 (AtDTX50)	DETOXIFICATION EFFLUX CARRIER 50; Multidrug and toxic compound extrusion protein 50 (MATE protein 50); Protein ABNORMAL SHOOT 3-like 1	DTX50_ARATH	Q9FJ87	Q7FLS2	DTX50	na	Arabidopsis thaliana (Mouse-ear cress)	3702
High	Master Protein	GLYMA_02G047600	1.6.99.1 - NADPH dehydrogenase / NADPH diaphorase (1 of 3)	0	166.674	39	13	53	13	362	40.4	8.21	187.31	13	0	0.579	0.657889	15.42	73.4	126.6	60.12	64.71	High	High	High	High	High	Peak Found	1		3	3	Present Both	1	GLYMA_02G047600	GLYMA_02G047600	sp|Q9FKW6|FNRL1_ARATH	Ferredoxin--NADP reductase, leaf isozyme 1, chloroplastic GN=LFNR1	ident:308/362 pos:338/362 query:362 hit:360 align:366 bit:609.0	OK	Ferredoxin--NADP reductase, leaf isozyme 1, chloroplastic	Leaf FNR 1 (AtLFNR1; FNR-1)	FNRL1_ARATH	Q9FKW6	Q0WWE2; Q9SUJ3	LFNR1	PETH1	Arabidopsis thaliana (Mouse-ear cress)	3702
High	Master Protein	GLYMA_08G104300	1.6.99.3 - NADH dehydrogenase / Type I dehydrogenase (1 of 23)	0	144.465	66	8	61	8	91	11.2	8.18	253.86	8	0	1.245	0.915556	37.67	85.1	114.9	4.29	30.44	High	High	High	High	High	High	1		3	3	Present Both	1	GLYMA_08G104300	GLYMA_08G104300	sp|Q9SS87|SEOB_ARATH	Protein SIEVE ELEMENT OCCLUSION B GN=SEOB	ident:20/91 pos:32/91 query:91 hit:740 align:66 bit:30.4	Partial_match_hit	Protein SIEVE ELEMENT OCCLUSION B (AtSEOb)	Protein SIEVE ELEMENT OCCLUSION-RELATED 1 (AtSEOR1)	SEOB_ARATH	Q9SS87	na	SEOB	na	Arabidopsis thaliana (Mouse-ear cress)	3702
High	Master Protein	GLYMA_10G124700	2.3.1.16 - Acetyl-CoA C-acyltransferase / Beta-ketothiolase (1 of 4)	0	18.165	13	4	6	4	463	48.6	7.8	10.81	4	0	2.467	0.68603	115.31	44.5	155.5	15.12	114.69	High	Peak Found	Not Found	Peak Found	Not Found	High	1		2	2	Present Both	1	GLYMA_10G124700	GLYMA_10G124700	sp|Q56WD9|THIK2_ARATH	3-ketoacyl-CoA thiolase 2, peroxisomal GN=PED1	ident:393/463 pos:430/463 query:463 hit:462 align:462 bit:803.5	OK	3-ketoacyl-CoA thiolase 2, peroxisomal	Acetyl-CoA acyltransferase 2; Beta-ketothiolase 2; Peroxisomal 3-oxoacyl-CoA thiolase 2; Peroxisome defective protein 1	THIK2_ARATH	Q56WD9	Q93Z35; Q9S7M3	PED1	KAT2	Arabidopsis thaliana (Mouse-ear cress)	3702
High	Master Protein	GLYMA_16G129500	2.7.7.79 - tRNA(His) guanylyltransferase / Histidine tRNA guanylyltransferase (1 of 5)	0	2.822	3	1	4	1	298	34.8	6.06	8.93	1	0	0.796	0.8704	21.93	107.3	92.7	15.43	27.08	High	High	Not Found	High	High	Peak Found	1		2	3	Present Both	1	GLYMA_16G129500	GLYMA_16G129500	sp|F4IRQ5|THG1_ARATH	tRNA(His) guanylyltransferase 1 GN=THG1	ident:159/298 pos:208/298 query:298 hit:567 align:346 bit:290.8	OK	tRNA(His) guanylyltransferase 1	na	THG1_ARATH	F4IRQ5	Q9SIQ0	THG1	na	Arabidopsis thaliana (Mouse-ear cress)	3702
High	Master Protein	GLYMA_01G225200	2.7.8.11//6.2.1.3 - CDP-diacylglycerol--inositol 3-phosphatidyltransferase / Phosphatidylinositol synthase // Long-chain-fatty-acid--CoA ligase / Lignoceroyl-CoA synthase (1 of 3)	0.009	1.788	1	1	3	1	671	75.3	7.23	5.38	1	0	1.484	0.865662	120.03	80.5	119.5	34.93	116.01	High	High	Peak Found	Peak Found	Peak Found	High	1		3	3	Present Both	1	GLYMA_01G225200	GLYMA_01G225200	sp|Q9T0A0|LACS4_ARATH	Long chain acyl-CoA synthetase 4 GN=LACS4	ident:490/671 pos:574/671 query:671 hit:666 align:645 bit:1057.4	OK	Long chain acyl-CoA synthetase 4	na	LACS4_ARATH	Q9T0A0	na	LACS4	na	Arabidopsis thaliana (Mouse-ear cress)	3702
High	Master Protein	GLYMA_08G200000	3.1.3.2 - Acid phosphatase / Phosphomonoesterase (1 of 61)	0	252.385	50	16	99	16	267	30.3	7.83	373.54	16	0	1.671	0.73845	64.22	105.9	94.1	54.06	101.66	High	High	High	High	High	Peak Found	1		3	3	Present Both	1	GLYMA_08G200000	GLYMA_08G200000	sp|O49195|VSP1_ARATH	Vegetative storage protein 1 GN=VSP1	ident:108/267 pos:145/267 query:267 hit:270 align:230 bit:197.6	Poor_match	Vegetative storage protein 1	na	VSP1_ARATH	O49195	O23827; O82121; Q39259; Q42000; Q93VJ6	VSP1	na	Arabidopsis thaliana (Mouse-ear cress)	3702
High	Master Protein	GLYMA_07G014600	3.1.3.2 - Acid phosphatase / Phosphomonoesterase (1 of 61)	0	21.648	20	3	7	3	264	30.1	6.73	25.24	3	0	1.158	0.956897	39.86	110	90	23.77	64.35	High	High	Not Found	High	High	Not Found	1		2	2	Present Both	1	GLYMA_07G014600	GLYMA_07G014600	sp|O49195|VSP1_ARATH	Vegetative storage protein 1 GN=VSP1	ident:101/264 pos:142/264 query:264 hit:270 align:218 bit:192.6	Poor_match	Vegetative storage protein 1	na	VSP1_ARATH	O49195	O23827; O82121; Q39259; Q42000; Q93VJ6	VSP1	na	Arabidopsis thaliana (Mouse-ear cress)	3702
High	Master Protein	GLYMA_08G150400	3.2.1.119//3.2.1.21 - Beta-glucosidase / Gentobiase (1 of 4)	0	31.738	8	2	5	1	443	50.5	9	14.51	2	0	0.01	6.62973e-17		200		7.06		High	High	Not Found	Not Found	Not Found	Not Found	1		2	0	Only Control	1	GLYMA_08G150400	GLYMA_08G150400	sp|O64882|BGL17_ARATH	Beta-glucosidase 17 GN=BGLU17	ident:222/443 pos:304/443 query:443 hit:517 align:476 bit:446.4	OK	Beta-glucosidase 17 (AtBGLU17)	na	BGL17_ARATH	O64882	B3H6D8; Q8GY78	BGLU17	na	Arabidopsis thaliana (Mouse-ear cress)	3702
High	Master Protein	GLYMA_01G081300	3.2.1.177 - Alpha-D-xyloside xylohydrolase / Alpha-xylosidase (1 of 3)	0	55.296	7	7	32	7	928	102.9	6.7	87.45	7	0	0.656	0.753572	16.27	122.2	77.8	9.5	31.22	High	High	High	High	High	High	1		3	3	Present Both	1	GLYMA_01G081300	GLYMA_01G081300	sp|Q9S7Y7|XYL1_ARATH	Alpha-xylosidase 1 GN=XYL1	ident:682/928 pos:782/928 query:928 hit:915 align:900 bit:1459.9	OK	Alpha-xylosidase 1	na	XYL1_ARATH	Q9S7Y7	P80846; Q9ZP26	XYL1	AXY3	Arabidopsis thaliana (Mouse-ear cress)	3702
High	Master Protein	GLYMA_04G074000	3.2.1.39 - Glucan endo-1,3-beta-D-glucosidase / Laminarinase (1 of 124)	0	13.989	3	1	3	1	489	53.4	6.25	11.88	1	0	1.409	0.881922	21.05	83	117	21.64	12.23	High	High	Not Found	Peak Found	High	Not Found	1		2	2	Present Both	1	GLYMA_04G074000	GLYMA_04G074000	sp|Q9M088|E135_ARATH	Glucan endo-1,3-beta-glucosidase 5 GN=EXO70H1	ident:326/489 pos:398/489 query:489 hit:484 align:479 bit:696.4	OK	Glucan endo-1,3-beta-glucosidase 5	(1->3)-beta-glucan endohydrolase 5 ((1->3)-beta-glucanase 5); Beta-1,3-endoglucanase 5 (Beta-1,3-glucanase 5)	E135_ARATH	Q9M088	Q0WNN9	OrderedLocusNames=At4g31140	na	Arabidopsis thaliana (Mouse-ear cress)	3702
High	Master Protein	GLYMA_13G267900	3.4.19.9 - Gamma-glutamyl hydrolase / Pteroyl-poly-alpha-glutamate hydrolase (1 of 3)	0	247.456	62	14	67	14	175	19.9	8.88	271.26	14	0	1.264	0.906527	41.97	85.9	114.1	19.47	84.82	High	High	High	High	High	High	1		3	3	Present Both	1	GLYMA_13G267900	GLYMA_13G267900	sp|Q9SYL6|GGH1_ARATH	Gamma-glutamyl hydrolase 1 GN=GGH1	ident:97/175 pos:121/175 query:175 hit:348 align:172 bit:205.7	Partial_match_hit	Gamma-glutamyl hydrolase 1 (AtGGH1)	Conjugase; GH; Gamma-Glu-X carboxypeptidase	GGH1_ARATH	Q9SYL6	Q29Q19; Q93Z97	GGH1	na	Arabidopsis thaliana (Mouse-ear cress)	3702
High	Master Protein	GLYMA_02G028200	3.4.24.7 - Interstitial collagenase / Vertebrate collagenase (1 of 6)	0	11.184	5	2	3	2	386	43.8	9.09	8.96	2	0	1.755	0.772594	97.08	46.6	153.4	6.7	50.92	High	Peak Found	Not Found	High	High	Not Found	1		2	2	Present Both	1	GLYMA_02G028200	GLYMA_02G028200	sp|Q9ZUJ5|5MMP_ARATH	Metalloendoproteinase 5-MMP GN=5MMP	ident:96/386 pos:143/386 query:386 hit:360 align:260 bit:152.1	Poor_match	Metalloendoproteinase 5-MMP (At5-MMP)	na	5MMP_ARATH	Q9ZUJ5	na	5MMP	na	Arabidopsis thaliana (Mouse-ear cress)	3702
High	Master Protein	GLYMA_03G055900	3.5.4.17//3.5.4.6 - AMP deaminase / Myoadenylate deaminase (1 of 2)	0	25.089	6	3	11	3	847	96.2	6.83	25.3	3	0	1.945	0.820232	89.21	67.9	132.1	13.05	77.9	High	High	Not Found	High	High	High	1		2	3	Present Both	1	GLYMA_03G055900	GLYMA_03G055900	sp|O80452|AMPD_ARATH	AMP deaminase GN=AMPD	ident:665/847 pos:726/847 query:847 hit:839 align:854 bit:1350.1	OK	AMP deaminase (AtAMPD)	Protein EMBRYONIC FACTOR 1	AMPD_ARATH	O80452	B9DFX9; Q56XX1; Q93ZR9	AMPD	na	Arabidopsis thaliana (Mouse-ear cress)	3702
High	Master Protein	GLYMA_14G207800	3.6.1.23 - dUTP diphosphatase / dUTPase (1 of 2)	0	62.625	42	5	19	5	212	22.8	7.74	64.28	5	0	1.311	0.884111	70.05	60.8	139.2	73.09	71.35	High	High	High	High	High	Not Found	1		3	2	Present Both	1	GLYMA_14G207800	GLYMA_14G207800	sp|Q9STG6|DUT_ARATH	Deoxyuridine 5'-triphosphate nucleotidohydrolase GN=DUT	ident:129/212 pos:148/212 query:212 hit:166 align:163 bit:257.3	OK	Deoxyuridine 5'-triphosphate nucleotidohydrolase (dUTPase)	dUTP pyrophosphatase; dUTP-pyrophosphatase-like 1 (AtDUT1)	DUT_ARATH	Q9STG6	na	DUT	DUT1	Arabidopsis thaliana (Mouse-ear cress)	3702
High	Master Protein	GLYMA_18G048400	3.6.1.23 - dUTP diphosphatase / dUTPase (1 of 2)	0	32.017	27	3	8	3	150	15.7	5.53	26.81	3	0	1.207	0.960306	76.21	76.6	123.4	37.79	81.11	High	High	High	High	High	Not Found	1		3	2	Present Both	1	GLYMA_18G048400	GLYMA_18G048400	sp|Q9STG6|DUT_ARATH	Deoxyuridine 5'-triphosphate nucleotidohydrolase GN=DUT	ident:115/150 pos:130/150 query:150 hit:166 align:139 bit:243.4	OK	Deoxyuridine 5'-triphosphate nucleotidohydrolase (dUTPase)	dUTP pyrophosphatase; dUTP-pyrophosphatase-like 1 (AtDUT1)	DUT_ARATH	Q9STG6	na	DUT	DUT1	Arabidopsis thaliana (Mouse-ear cress)	3702
High	Master Protein	GLYMA_11G199900	3.6.4.8 - Proteasome ATPase / RP triple-A protein (1 of 3)	0	15.366	14	3	3	2	423	47.4	5.6	7.52	3	0	0.328	0.251389	0.41	155.7	44.3	5.36		High	Peak Found	Not Found	Peak Found	Not Found	Not Found	1		2	1	Only Control	1	GLYMA_11G199900	GLYMA_11G199900	sp|Q9SEI4|PRS6B_ARATH	26S proteasome regulatory subunit 6B homolog GN=RPT3	ident:383/423 pos:394/423 query:423 hit:408 align:420 bit:780.8	OK	26S proteasome regulatory subunit 6B homolog	26S protease subunit 6B homolog; 26S proteasome AAA-ATPase subunit RPT3; Protein BMAA insensitive morphology 409; Regulatory particle triple-A ATPase subunit 3	PRS6B_ARATH	Q9SEI4	Q5PNS4	RPT3	BIM409	Arabidopsis thaliana (Mouse-ear cress)	3702
High	Master Protein	GLYMA_11G209300	3.7.1.17//3.7.1.8 - 2,6-dioxo-6-phenylhexa-3-enoate hydrolase / HOHPDA hydrolase (1 of 3)	0	11.632	14	3	3	3	376	42	7.69	5.27	3	0	0.915	0.94963	81.99	82.9	117.1	11.91	67.8	High	Peak Found	Peak Found	Peak Found	High	High	1		3	3	Present Both	1	GLYMA_11G209300	GLYMA_11G209300	sp|Q9FJ24|BDG2_ARATH	Probable lysophospholipase BODYGUARD 2 GN=BDG2	ident:58/376 pos:114/376 query:376 hit:471 align:283 bit:40.0	Poor_match	Probable lysophospholipase BODYGUARD 2 (AtBDG2)	na	BDG2_ARATH	Q9FJ24	na	BDG2	na	Arabidopsis thaliana (Mouse-ear cress)	3702
High	Master Protein	GLYMA_14G082800	4.2.1.107 - 3-alpha,7-alpha,12-alpha-trihydroxy-5-beta-cholest-24-enoyl-CoA hydratase / D-3-hydroxyacyl-CoA dehydratase (1 of 2)	0	9.259	17	2	3	1	125	13.7	9.5	5.14	2	1	1.085	0.992627	53.35	108.6	91.4	17	21.94	High	Peak Found	Not Found	High	Not Found	Not Found	1		2	1	Only Control	1	GLYMA_14G082800	GLYMA_14G082800	sp|F4IG73|BCHC2_ARATH	BEACH domain-containing protein C2 GN=BCHC2	ident:14/125 pos:21/125 query:125 hit:3001 align:40 bit:26.6	Partial_match_both	BEACH domain-containing protein C2	BEACH-domain homolog C2	BCHC2_ARATH	F4IG73	O64634	BCHC2	na	Arabidopsis thaliana (Mouse-ear cress)	3702
High	Master Protein	GLYMA_12G159300	K00026 - malate dehydrogenase (MDH2) (1 of 7)	0	78.583	39	6	17	6	345	36.1	8.12	72.45	6	0	1.975	0.697637	37.06	45.4	154.6	53.27	93.28	High	High	High	High	High	High	1		3	3	Present Both	1	GLYMA_12G159300	GLYMA_12G159300	sp|Q9ZP06|MDHM1_ARATH	Malate dehydrogenase 1, mitochondrial GN=IDM2	ident:286/345 pos:313/345 query:345 hit:341 align:341 bit:590.1	OK	Malate dehydrogenase 1, mitochondrial	Mitochondrial MDH1 (mMDH1); Mitochondrial NAD-dependent malate dehydrogenase 1 (mNAD-MDH 1; mtNAD-MDH1)	MDHM1_ARATH	Q9ZP06	Q8LBB9; Q9MAH7	OrderedLocusNames=At1g53240	na	Arabidopsis thaliana (Mouse-ear cress)	3702
High	Master Protein	GLYMA_02G094300	K00164 - 2-oxoglutarate dehydrogenase E1 component (OGDH, sucA) (1 of 3)	0	34.898	5	4	9	4	1029	116.4	6.81	18.7	4	0	1.224	0.942237	142.11	27.5	172.5	118.4	90	High	Peak Found	Peak Found	Peak Found	Peak Found	High	1		3	3	Present Both	1	GLYMA_02G094300	GLYMA_02G094300	sp|Q8H1Y0|ODPA2_ARATH	Pyruvate dehydrogenase E1 component subunit alpha-2, mitochondrial GN=IAR4	ident:48/1029 pos:92/1029 query:1029 hit:393 align:196 bit:45.1	Partial_match_both	Pyruvate dehydrogenase E1 component subunit alpha-2, mitochondrial (PDHE1-A)	Protein IAA-CONJUGATE-RESISTANT 4	ODPA2_ARATH	Q8H1Y0	O48685	IAR4	na	Arabidopsis thaliana (Mouse-ear cress)	3702
High	Master Protein	GLYMA_12G222200	K00218 - protochlorophyllide reductase (E1.3.1.33, por) (1 of 2)	0	107.343	25	10	42	9	399	43.2	8.78	170.23	10	1	0.654	0.751502	29.68	125.9	74.1	13.75	64.57	High	High	High	High	High	Not Found	1		3	2	Present Both	1	GLYMA_12G222200	GLYMA_12G222200	sp|Q42536|PORA_ARATH	Protochlorophyllide reductase A, chloroplastic GN=PORA	ident:334/399 pos:368/399 query:399 hit:405 align:405 bit:689.1	OK	Protochlorophyllide reductase A, chloroplastic (PCR A)	NADPH-protochlorophyllide oxidoreductase A (POR A)	PORA_ARATH	Q42536	B9DGY6; Q9FK22	PORA	na	Arabidopsis thaliana (Mouse-ear cress)	3702
High	Master Protein	GLYMA_06G247100	K00218 - protochlorophyllide reductase (E1.3.1.33, por) (1 of 2)	0	26.53	14	4	6	3	399	43	9	16.31	4	0	0.536	0.594378	17.52	158.6	41.4	28.36	63.99	High	High	Peak Found	Peak Found	High	Not Found	1		3	2	Present Both	1	GLYMA_06G247100	GLYMA_06G247100	sp|Q42536|PORA_ARATH	Protochlorophyllide reductase A, chloroplastic GN=PORA	ident:319/399 pos:363/399 query:399 hit:405 align:405 bit:663.3	OK	Protochlorophyllide reductase A, chloroplastic (PCR A)	NADPH-protochlorophyllide oxidoreductase A (POR A)	PORA_ARATH	Q42536	B9DGY6; Q9FK22	PORA	na	Arabidopsis thaliana (Mouse-ear cress)	3702
High	Master Protein	GLYMA_10G286200	K00254 - dihydroorotate dehydrogenase (DHODH, pyrD) (1 of 2)	0	3.059	3	1	2	1	455	48.3	9.31	3.88	1	0	0.99	0.942368	267.73	100.5	99.5	19.51	127.87	High	High	Not Found	Peak Found	Not Found	Peak Found	1		2	2	Present Both	1	GLYMA_10G286200	GLYMA_10G286200	sp|P32746|PYRD_ARATH	Dihydroorotate dehydrogenase (quinone), mitochondrial GN=PYRD	ident:376/455 pos:409/455 query:455 hit:460 align:456 bit:766.5	OK	Dihydroorotate dehydrogenase (quinone), mitochondrial (DHOdehase)	Dihydroorotate oxidase	PYRD_ARATH	P32746	Q0WRX8; Q9FMX1	PYRD	na	Arabidopsis thaliana (Mouse-ear cress)	3702
High	Master Protein	GLYMA_02G066500	K00411 - ubiquinol-cytochrome c reductase iron-sulfur subunit (UQCRFS1, RIP1, petA) (1 of 3)	0	22.326	16	3	6	3	266	29.3	8.66	21.19	3	0	2.529	0.522864	83.13	56.7	143.3	17.1	74.16	High	High	Not Found	High	Peak Found	High	1		2	3	Present Both	1	GLYMA_02G066500	GLYMA_02G066500	sp|Q94JS0|UCRI1_ARATH	Cytochrome b-c1 complex subunit Rieske-1, mitochondrial GN=UCR1-1	ident:201/266 pos:221/266 query:266 hit:272 align:277 bit:400.2	OK	Cytochrome b-c1 complex subunit Rieske-1, mitochondrial	Complex III subunit 5-1; Rieske iron-sulfur protein 1 (RISP1); Ubiquinol-cytochrome c reductase iron-sulfur subunit 1	UCRI1_ARATH	Q94JS0	Q42140; Q56Z01; Q56Z95; Q8LEK8; Q9LYR3	UCR1-1	na	Arabidopsis thaliana (Mouse-ear cress)	3702
High	Master Protein	GLYMA_05G074400	K00413 - ubiquinol-cytochrome c reductase cytochrome c1 subunit (CYC1, CYT1, petC) (1 of 4)	0	44.562	11	2	12	2	308	33.9	7.21	46.95	2	0	0.707	0.804759	37.1	144.3	55.7	54.15	30.76	High	High	High	High	Peak Found	High	1		3	3	Present Both	1	GLYMA_05G074400	GLYMA_05G074400	sp|Q9FKS5|CYC1B_ARATH	Cytochrome c1 2, heme protein, mitochondrial GN=CYC12	ident:258/308 pos:280/308 query:308 hit:307 align:308 bit:497.7	OK	Cytochrome c1 2, heme protein, mitochondrial	Complex III subunit 4-2; Complex III subunit IV-2; Cytochrome b-c1 complex subunit 4-2; Ubiquinol-cytochrome-c reductase complex cytochrome c1 subunit 2 (Cytochrome c-1 2)	CYC1B_ARATH	Q9FKS5	F4KIR8; Q0WL66; Q0WNJ4; Q42065; Q94A63	CYC12	na	Arabidopsis thaliana (Mouse-ear cress)	3702
High	Master Protein	GLYMA_17G208000	K00417 - ubiquinol-cytochrome c reductase subunit 7 (QCR7, UQCRB) (1 of 2)	0	539.526	78	23	240	5	122	14.5	9.58	893.86	23	24	1.205	0.941533	62.36	89.5	110.5	7.12	20.5	High	High	High	High	High	High	1		3	3	Present Both	1	GLYMA_17G208000	GLYMA_17G208000	sp|F4JWS8|QCR72_ARATH	Cytochrome b-c1 complex subunit 7-2 GN=QCR7-2	ident:97/122 pos:110/122 query:122 hit:122 align:122 bit:206.1	OK	Cytochrome b-c1 complex subunit 7-2	Complex III subunit VII	QCR72_ARATH	F4JWS8	na	QCR7-2	na	Arabidopsis thaliana (Mouse-ear cress)	3702
High	Master Protein	GLYMA_14G126300	K00417 - ubiquinol-cytochrome c reductase subunit 7 (QCR7, UQCRB) (1 of 2)	0	473.564	78	21	219	3	122	14.6	9.61	763.55	21	0	1.251	0.911815	62.26	92.6	107.4	10.34	73.69	High	High	High	High	High	High	1		3	3	Present Both	1	GLYMA_14G126300	GLYMA_14G126300	sp|F4JWS8|QCR72_ARATH	Cytochrome b-c1 complex subunit 7-2 GN=QCR7-2	ident:98/122 pos:110/122 query:122 hit:122 align:122 bit:205.7	OK	Cytochrome b-c1 complex subunit 7-2	Complex III subunit VII	QCR72_ARATH	F4JWS8	na	QCR7-2	na	Arabidopsis thaliana (Mouse-ear cress)	3702
High	Master Protein	GLYMA_03G195700	K00419 - ubiquinol-cytochrome c reductase subunit 9 (QCR9, UCRC) (1 of 2)	0	77.801	59	7	35	7	71	8.1	9.6	110.55	7	0	1.415	0.851856	82.03	100.5	99.5	39.25	136.12	High	High	High	High	High	High	1		3	3	Present Both	1	GLYMA_03G195700	GLYMA_03G195700	sp|Q9SHE9|LBD4_ARATH	LOB domain-containing protein 4 GN=LBD4	ident:16/71 pos:34/71 query:71 hit:172 align:65 bit:28.1	Partial_match_hit	LOB domain-containing protein 4	ASYMMETRIC LEAVES 2-like protein 6 (AS2-like protein 6)	LBD4_ARATH	Q9SHE9	B7XG60; Q6DBF5	LBD4	ASL6	Arabidopsis thaliana (Mouse-ear cress)	3702
High	Master Protein	GLYMA_13G153500	K00419 - ubiquinol-cytochrome c reductase subunit 9 (QCR9, UCRC) (1 of 2)	0	8.504	15	2	9	2	73	8.4	9.25	24.21	2	0	1.195	0.944508	63.61	99.1	100.9	52.11	128.43	High	High	High	High	High	High	1		3	3	Present Both	1	GLYMA_13G153500	GLYMA_13G153500	sp|Q9LHF0|ZHD9_ARATH	Zinc-finger homeodomain protein 9 GN=ZHD9	ident:11/73 pos:12/73 query:73 hit:312 align:19 bit:26.6	Partial_match_both	Zinc-finger homeodomain protein 9 (AtZHD9)	Homeobox protein 34 (AtHB-34)	ZHD9_ARATH	Q9LHF0	na	ZHD9	HB34	Arabidopsis thaliana (Mouse-ear cress)	3702
High	Master Protein	GLYMA_16G164400	K00430 - peroxidase (E1.11.1.7) (1 of 157)	0	230.009	46	21	35	21	345	38.1	6.44	119.03	21	0	2.892	0.273576	121.24	131.6	68.4	34.85	171.01	High	High	Peak Found	Peak Found	Peak Found	High	1		3	3	Present Both	1	GLYMA_16G164400	GLYMA_16G164400	sp|Q96520|PER12_ARATH	Peroxidase 12 GN=PER12	ident:159/345 pos:205/345 query:345 hit:358 align:319 bit:306.2	Poor_match	Peroxidase 12 (Atperox P12)	ATP4a; PRXR6	PER12_ARATH	Q96520	Q43734	PER12	P12	Arabidopsis thaliana (Mouse-ear cress)	3702
High	Master Protein	GLYMA_11G161600	K00430 - peroxidase (E1.11.1.7) (1 of 157)	0	60.258	23	5	10	5	329	36.1	9.73	33.28	5	0	1.59	0.783294	63.6	167.5	32.5	59.31	2.28	High	High	Peak Found	High	High	Not Found	1		3	2	Present Both	1	GLYMA_11G161600	GLYMA_11G161600	sp|Q9LVL2|PER67_ARATH	Peroxidase 67 GN=PER67	ident:202/329 pos:258/329 query:329 hit:316 align:313 bit:427.2	OK	Peroxidase 67 (Atperox P67)	ATP44	PER67_ARATH	Q9LVL2	na	PER67	P67	Arabidopsis thaliana (Mouse-ear cress)	3702
High	Master Protein	GLYMA_20G114500	K00627 - pyruvate dehydrogenase E2 component (dihydrolipoamide acetyltransferase) (DLAT, aceF, pdhC) (1 of 7)	0	83.971	22	6	13	6	506	52.7	8.16	45.18	6	0	1.013	0.992627	130.04	116.8	83.2	51.48	151.56	High	High	Not Found	High	Peak Found	High	1		2	3	Present Both	1	GLYMA_20G114500	GLYMA_20G114500	sp|Q9SQI8|ODP24_ARATH	Dihydrolipoyllysine-residue acetyltransferase component 4 of pyruvate dehydrogenase complex, chloroplastic GN=LTA2	ident:348/506 pos:389/506 query:506 hit:480 align:507 bit:616.3	OK	Dihydrolipoyllysine-residue acetyltransferase component 4 of pyruvate dehydrogenase complex, chloroplastic	Dihydrolipoamide S-acetyltransferase component 4 of pyruvate dehydrogenase complex; Pyruvate dehydrogenase complex component E2 4 (PDC-E2 4; PDCE2 4; plE2)	ODP24_ARATH	Q9SQI8	Q9LUA6	LTA2	na	Arabidopsis thaliana (Mouse-ear cress)	3702
High	Master Protein	GLYMA_07G115900	K00940 - nucleoside-diphosphate kinase (ndk, NME) (1 of 8)	0	73.077	33	8	38	1	149	16.5	6.8	101.29	8	0	1.319	0.912904	113.45	75.1	124.9	113.48	52.35	High	High	High	High	High	Not Found	1		3	2	Present Both	1	GLYMA_07G115900	GLYMA_07G115900	sp|P39207|NDK1_ARATH	Nucleoside diphosphate kinase 1 GN=NDK1	ident:128/149 pos:136/149 query:149 hit:149 align:147 bit:268.9	OK	Nucleoside diphosphate kinase 1	Nucleoside diphosphate kinase I (NDK I; NDP kinase I; NDPK I)	NDK1_ARATH	P39207	F4JJZ8; Q41989; Q94JY5	NDK1	NDPK1	Arabidopsis thaliana (Mouse-ear cress)	3702
High	Master Protein	GLYMA_11G226900	K01100 - sedoheptulose-bisphosphatase (E3.1.3.37) (1 of 2)	0	9.302	4	1	3	1	387	41.8	6.2	9.69	1	0	0.01	6.62973e-17		200		46.89		High	High	Peak Found	High	Not Found	Not Found	1		3	1	Only Control	1	GLYMA_11G226900	GLYMA_11G226900	sp|P46283|S17P_ARATH	Sedoheptulose-1,7-bisphosphatase, chloroplastic GN=CCT6B	ident:311/387 pos:342/387 query:387 hit:393 align:394 bit:627.1	OK	Sedoheptulose-1,7-bisphosphatase, chloroplastic	SED(1,7)P2ase; Sedoheptulose bisphosphatase (SBPase)	S17P_ARATH	P46283	Q940F8	OrderedLocusNames=At3g55800	na	Arabidopsis thaliana (Mouse-ear cress)	3702
High	Master Protein	GLYMA_15G133700	K01187 - alpha-glucosidase (malZ) (1 of 3)	0	5.545	1	1	3	1	937	104.9	7.14	7.86	1	0	0.659	0.799527	16.07	125	75	25.11	37.38	High	High	Peak Found	High	Peak Found	Not Found	1		3	2	Present Both	1	GLYMA_15G133700	GLYMA_15G133700	sp|Q9S7Y7|XYL1_ARATH	Alpha-xylosidase 1 GN=XYL1	ident:414/937 pos:583/937 query:937 hit:915 align:899 bit:822.4	Poor_match	Alpha-xylosidase 1	na	XYL1_ARATH	Q9S7Y7	P80846; Q9ZP26	XYL1	AXY3	Arabidopsis thaliana (Mouse-ear cress)	3702
High	Master Protein	GLYMA_08G031800	K01412 - mitochondrial-processing peptidase subunit alpha [EC:3.4.24.64] (PMPCA, MAS2) (1 of 6)	0	180.916	26	11	60	6	509	54.8	5.77	252.17	11	4	0.527	0.581816	12.33	136.4	63.6	57.18	114.39	High	High	Not Found	High	High	High	1		2	3	Present Both	1	GLYMA_08G031800	GLYMA_08G031800	sp|Q9ZU25|MPPA1_ARATH	Probable mitochondrial-processing peptidase subunit alpha-1, mitochondrial GN=MORF9	ident:329/509 pos:393/509 query:509 hit:503 align:508 bit:632.5	OK	Probable mitochondrial-processing peptidase subunit alpha-1, mitochondrial	Alpha-MPP 1	MPPA1_ARATH	Q9ZU25	Q0WW81; Q8L9K3	OrderedLocusNames=At1g51980	na	Arabidopsis thaliana (Mouse-ear cress)	3702
High	Master Protein	GLYMA_08G199900	K01412 - mitochondrial-processing peptidase subunit alpha [EC:3.4.24.64] (PMPCA, MAS2) (1 of 6)	0	142.164	29	13	48	3	505	54.4	6.21	146.52	13	10	0.688	0.797038	27.77	122.6	77.4	68.21	131.7	High	High	Not Found	High	Peak Found	High	1		2	3	Present Both	1	GLYMA_08G199900	GLYMA_08G199900	sp|Q9ZU25|MPPA1_ARATH	Probable mitochondrial-processing peptidase subunit alpha-1, mitochondrial GN=MORF9	ident:348/505 pos:406/505 query:505 hit:503 align:506 bit:664.1	OK	Probable mitochondrial-processing peptidase subunit alpha-1, mitochondrial	Alpha-MPP 1	MPPA1_ARATH	Q9ZU25	Q0WW81; Q8L9K3	OrderedLocusNames=At1g51980	na	Arabidopsis thaliana (Mouse-ear cress)	3702
High	Master Protein	GLYMA_11G113900	K01527 - nascent polypeptide-associated complex subunit beta (EGD1, BTF3) (1 of 4)	0	286.426	56	11	72	6	162	17.7	7.4	392.75	11	5	0.451	0.449298	15.86	165.3	34.7	70.86	79.64	High	High	High	High	High	Not Found	1		3	2	Present Both	1	GLYMA_11G113900	GLYMA_11G113900	sp|Q9SMW7|BTF3_ARATH	Basic transcription factor 3 GN=BTF3	ident:132/162 pos:139/162 query:162 hit:165 align:152 bit:259.2	OK	Basic transcription factor 3 (AtBTF3)	Nascent polypeptide-associated complex subunit beta	BTF3_ARATH	Q9SMW7	Q93ZB5	BTF3	na	Arabidopsis thaliana (Mouse-ear cress)	3702
High	Master Protein	GLYMA_01G080200	K01527 - nascent polypeptide-associated complex subunit beta (EGD1, BTF3) (1 of 4)	0	121.073	61	9	35	4	159	17.4	6.6	163.55	9	0	0.486	0.515142	5.67	149.1	50.9	77.28	50.34	High	High	Peak Found	High	Peak Found	Not Found	1	Acetyl [N-Term]	3	2	Present Both	1	GLYMA_01G080200	GLYMA_01G080200	sp|Q9SMW7|BTF3_ARATH	Basic transcription factor 3 GN=BTF3	ident:123/159 pos:137/159 query:159 hit:165 align:151 bit:246.5	OK	Basic transcription factor 3 (AtBTF3)	Nascent polypeptide-associated complex subunit beta	BTF3_ARATH	Q9SMW7	Q93ZB5	BTF3	na	Arabidopsis thaliana (Mouse-ear cress)	3702
High	Master Protein	GLYMA_13G046200	K01602 - ribulose-bisphosphate carboxylase small chain (rbcS) (1 of 5)	0	69.993	24	7	28	7	178	20	8.66	92.66	7	0	0.589	0.670218	12.2	125.9	74.1	36.95	82.16	High	High	High	High	High	Peak Found	1		3	3	Present Both	1	GLYMA_13G046200	GLYMA_13G046200	sp|P10798|RBS3B_ARATH	Ribulose bisphosphate carboxylase small chain 3B, chloroplastic GN=RBCS-3B	ident:143/178 pos:155/178 query:178 hit:181 align:179 bit:302.8	OK	Ribulose bisphosphate carboxylase small chain 3B, chloroplastic (RuBisCO small subunit 3B)	na	RBS3B_ARATH	P10798	Q9FF21	RBCS-3B	ATS3B	Arabidopsis thaliana (Mouse-ear cress)	3702
High	Master Protein	GLYMA_15G051100	K01613 - phosphatidylserine decarboxylase (psd, PISD) (1 of 4)	0	6.895	2	1	2	1	650	72.6	7.11	6.32	1	0	0.697	0.813144	5.03	117.8	82.2	9.85		High	High	Not Found	Peak Found	Not Found	Not Found	1		2	1	Only Control	1	GLYMA_15G051100	GLYMA_15G051100	sp|F4KAK5|PSD2_ARATH	Phosphatidylserine decarboxylase proenzyme 2 GN=PSD2	ident:441/650 pos:532/650 query:650 hit:635 align:656 bit:922.5	OK	Phosphatidylserine decarboxylase 2 alpha chain	na	PSD2_ARATH	F4KAK5	A4GNA9; Q9LU67	PSD2	na	Arabidopsis thaliana (Mouse-ear cress)	3702
High	Master Protein	GLYMA_07G162900	K01723 - hydroperoxide dehydratase (AOS) (1 of 4)	0	109.987	26	9	20	9	522	58.7	8.53	68.37	9	0	1.566	0.795195	73.29	94	106	14.87	142.75	High	Peak Found	Peak Found	High	High	High	1		3	3	Present Both	1	GLYMA_07G162900	GLYMA_07G162900	sp|Q96242|CP74A_ARATH	Allene oxide synthase, chloroplastic GN=CYP74A	ident:247/522 pos:337/522 query:522 hit:518 align:513 bit:487.3	Poor_match	Allene oxide synthase, chloroplastic	Cytochrome P450 74A; Hydroperoxide dehydrase	CP74A_ARATH	Q96242	P93720; Q9ZR51	CYP74A	AOS	Arabidopsis thaliana (Mouse-ear cress)	3702
High	Master Protein	GLYMA_13G079900	K01897 - long-chain acyl-CoA synthetase (ACSL, fadD) (1 of 21)	0	11.82	3	1	3	1	696	76.1	6.27	7.19	1	0	0.389	0.460316	3.84	144	56	39.19		High	High	High	Peak Found	Not Found	Not Found	1		3	1	Only Control	1	GLYMA_13G079900	GLYMA_13G079900	sp|Q9CAP8|LACS9_ARATH	Long chain acyl-CoA synthetase 9, chloroplastic GN=LACS9	ident:516/696 pos:605/696 query:696 hit:691 align:695 bit:1101.3	OK	Long chain acyl-CoA synthetase 9, chloroplastic	na	LACS9_ARATH	Q9CAP8	Q0WLQ0; Q84WQ8	LACS9	na	Arabidopsis thaliana (Mouse-ear cress)	3702
High	Master Protein	GLYMA_06G067400	K02109 - F-type H+-transporting ATPase subunit b (ATPF0B, atpF) (1 of 3)	0	269.701	44	14	74	14	215	23.4	5.83	326.07	14	0	0.356	0.238585	8.27	152.5	47.5	55.46	78.07	High	High	High	High	High	Peak Found	1		3	3	Present Both	1	GLYMA_06G067400	GLYMA_06G067400	sp|Q9LZY0|MA654_ARATH	65-kDa microtubule-associated protein 4 GN=MAP65-4	ident:27/215 pos:40/215 query:215 hit:677 align:70 bit:31.2	Partial_match_both	65-kDa microtubule-associated protein 4 (AtMAP65-4)	na	MA654_ARATH	Q9LZY0	F4JD03	MAP65-4	na	Arabidopsis thaliana (Mouse-ear cress)	3702
High	Master Protein	GLYMA_12G231900	K02109 - F-type H+-transporting ATPase subunit b (ATPF0B, atpF) (1 of 3)	0	150.923	73	10	33	10	127	14.8	8.72	135.35	10	0	0.659	0.759274	28.9	139.8	60.2	31.69	90.08	High	High	High	High	High	Peak Found	1		3	3	Present Both	1	GLYMA_12G231900	GLYMA_12G231900	sp|P56759|ATPF_ARATH	ATP synthase subunit b, chloroplastic GN=atpF	ident:106/127 pos:116/127 query:127 hit:184 align:127 bit:211.5	OK	ATP synthase subunit b, chloroplastic	ATP synthase F(0) sector subunit b; ATPase subunit I	ATPF_ARATH	P56759	na	atpF	na	Arabidopsis thaliana (Mouse-ear cress)	3702
High	Master Protein	GLYMA_12G232000	K02111 - F-type H+-transporting ATPase subunit alpha (ATPF1A, atpA) (1 of 2)	0	472.356	53	28	180	28	510	55.7	5.21	699.85	28	0	0.526	0.581551	17.95	141.8	58.2	6.95	39.68	High	High	High	High	High	High	1		3	3	Present Both	1	GLYMA_12G232000	GLYMA_12G232000	sp|P56757|ATPA_ARATH	ATP synthase subunit alpha, chloroplastic GN=atpA	ident:480/510 pos:492/510 query:510 hit:507 align:507 bit:966.5	OK	ATP synthase subunit alpha, chloroplastic	ATP synthase F1 sector subunit alpha; F-ATPase subunit alpha	ATPA_ARATH	P56757	na	atpA	na	Arabidopsis thaliana (Mouse-ear cress)	3702
High	Master Protein	GLYMA_05G048000	K02113 - F-type H+-transporting ATPase subunit delta (ATPF1D, atpH) (1 of 2)	0	152.083	38	11	76	2	248	26.8	7.56	264.42	11	10	0.833	0.893467	35.3	111.6	88.4	44.46	86.32	High	High	High	High	High	Not Found	1		3	2	Present Both	1	GLYMA_05G048000	GLYMA_05G048000	sp|Q9SSS9|ATPD_ARATH	ATP synthase subunit delta, chloroplastic GN=ATPD	ident:153/248 pos:188/248 query:248 hit:234 align:249 bit:282.0	OK	ATP synthase subunit delta, chloroplastic	ATP synthase F(1) sector subunit delta; F-type ATPase subunit delta	ATPD_ARATH	Q9SSS9	Q8RY87	ATPD	na	Arabidopsis thaliana (Mouse-ear cress)	3702
High	Master Protein	GLYMA_02G184000	K02114 - F-type H+-transporting ATPase subunit epsilon (ATPF1E, atpC) (1 of 1)	0	45.873	21	4	22	4	123	13.7	6.79	59.22	4	0	0.603	0.686947	6.68	126.7	73.3	10.03	27.52	High	High	High	High	High	Not Found	1		3	2	Present Both	1	GLYMA_02G184000	GLYMA_02G184000	sp|P09468|ATPE_ARATH	ATP synthase epsilon chain, chloroplastic GN=atpE	ident:93/123 pos:101/123 query:123 hit:132 align:109 bit:188.7	OK	ATP synthase epsilon chain, chloroplastic	ATP synthase F1 sector epsilon subunit; F-ATPase epsilon subunit	ATPE_ARATH	P09468	na	atpE	na	Arabidopsis thaliana (Mouse-ear cress)	3702
High	Master Protein	GLYMA_13G204800	K02115 - F-type H+-transporting ATPase subunit gamma (ATPF1G, atpG) (1 of 3)	0	93.185	17	8	38	8	375	41.3	7.61	107.03	8	0	0.533	0.584163	24.7	130.9	69.1	8.45	68.32	High	High	High	High	High	Peak Found	1		3	3	Present Both	1	GLYMA_13G204800	GLYMA_13G204800	sp|Q01908|ATPG1_ARATH	ATP synthase gamma chain 1, chloroplastic GN=ATPC1	ident:319/375 pos:345/375 query:375 hit:373 align:376 bit:621.3	OK	ATP synthase gamma chain 1, chloroplastic	F-ATPase gamma subunit 1	ATPG1_ARATH	Q01908	na	ATPC1	na	Arabidopsis thaliana (Mouse-ear cress)	3702
High	Master Protein	GLYMA_10G267200	K02133 - F-type H+-transporting ATPase subunit beta (ATPeF1B, ATP5B, ATP2) (1 of 3)	0	870.286	71	40	356	6	559	59.8	6.15	1613.25	40	38	1.173	0.952604	108.12	80.9	119.1	30.64	61.65	High	High	High	High	High	High	1		3	3	Present Both	1	GLYMA_10G267200	GLYMA_10G267200	sp|Q9C5A9|ATPBO_ARATH	ATP synthase subunit beta-3, mitochondrial GN=ATG8C	ident:453/559 pos:491/559 query:559 hit:559 align:540 bit:906.7	OK	ATP synthase subunit beta-3, mitochondrial	na	ATPBO_ARATH	Q9C5A9	na	OrderedLocusNames=At5g08680	na	Arabidopsis thaliana (Mouse-ear cress)	3702
High	Master Protein	GLYMA_20G123600	K02133 - F-type H+-transporting ATPase subunit beta (ATPeF1B, ATP5B, ATP2) (1 of 3)	0	855.951	70	38	354	4	559	59.8	6.15	1607.28	38	0	1.196	0.943609	122.08	94.8	105.2	5.71	78.37	High	High	High	High	High	High	1		3	3	Present Both	1	GLYMA_20G123600	GLYMA_20G123600	sp|Q9C5A9|ATPBO_ARATH	ATP synthase subunit beta-3, mitochondrial GN=ATG8C	ident:451/559 pos:488/559 query:559 hit:559 align:524 bit:913.3	OK	ATP synthase subunit beta-3, mitochondrial	na	ATPBO_ARATH	Q9C5A9	na	OrderedLocusNames=At5g08680	na	Arabidopsis thaliana (Mouse-ear cress)	3702
High	Master Protein	GLYMA_07G117000	K02134 - F-type H+-transporting ATPase subunit delta (ATPeF1D, ATP5D, ATP16) (1 of 2)	0	476.575	81	17	196	12	197	20.8	7.58	959.35	17	0	1.14	0.960306	70.92	105.6	94.4	6.81	45.21	High	High	High	High	High	High	1		3	3	Present Both	1	GLYMA_07G117000	GLYMA_07G117000	sp|Q96252|ATP4_ARATH	ATP synthase subunit delta', mitochondrial GN=ATL75	ident:139/197 pos:161/197 query:197 hit:203 align:182 bit:292.7	OK	ATP synthase subunit delta', mitochondrial	F-ATPase delta' subunit	ATP4_ARATH	Q96252	na	OrderedLocusNames=At5g47030	na	Arabidopsis thaliana (Mouse-ear cress)	3702
High	Master Protein	GLYMA_03G105300	K02134 - F-type H+-transporting ATPase subunit delta (ATPeF1D, ATP5D, ATP16) (1 of 2)	0	464.48	81	17	175	12	197	20.8	7.58	887.19	17	7	1.214	0.937997	69.3	98.3	101.7	14.44	32.41	High	High	High	High	High	High	1		3	3	Present Both	1	GLYMA_03G105300	GLYMA_03G105300	sp|Q96252|ATP4_ARATH	ATP synthase subunit delta', mitochondrial GN=ATL75	ident:136/197 pos:162/197 query:197 hit:203 align:182 bit:290.4	OK	ATP synthase subunit delta', mitochondrial	F-ATPase delta' subunit	ATP4_ARATH	Q96252	na	OrderedLocusNames=At5g47030	na	Arabidopsis thaliana (Mouse-ear cress)	3702
High	Master Protein	GLYMA_07G003700	K02135 - F-type H+-transporting ATPase subunit epsilon (ATPeF1E, ATP5E, ATP15) (1 of 1)	0	57.208	39	4	23	4	70	7.9	8.91	69.52	4	0	1.247	0.914064	22.31	95.7	104.3	10.22	18.76	High	High	High	High	High	High	1		3	3	Present Both	1	GLYMA_07G003700	GLYMA_07G003700	sp|Q96253|ATP5E_ARATH	ATP synthase subunit epsilon, mitochondrial GN=BLI	ident:54/70 pos:64/70 query:70 hit:70 align:69 bit:125.6	OK	ATP synthase subunit epsilon, mitochondrial (ATPase subunit epsilon)	na	ATP5E_ARATH	Q96253	na	OrderedLocusNames=At1g51650	na	Arabidopsis thaliana (Mouse-ear cress)	3702
High	Master Protein	GLYMA_06G203200	K02136 - F-type H+-transporting ATPase subunit gamma (ATPeF1G, ATP5C1, ATP3) (1 of 2)	0	63.712	23	7	13	7	324	35.4	9.06	35.18	7	0	0.785	0.866034	66.75	60.1	139.9	68.1	88.91	High	High	Peak Found	High	High	High	1		3	3	Present Both	1	GLYMA_06G203200	GLYMA_06G203200	sp|Q96250|ATPG3_ARATH	ATP synthase subunit gamma, mitochondrial GN=ATPC	ident:262/324 pos:288/324 query:324 hit:325 align:329 bit:528.9	OK	ATP synthase subunit gamma, mitochondrial	F-ATPase gamma subunit	ATPG3_ARATH	Q96250	Q7GB12	ATPC	na	Arabidopsis thaliana (Mouse-ear cress)	3702
High	Master Protein	GLYMA_15G273900	K02137 - F-type H+-transporting ATPase subunit O (ATPeF0O, ATP5O, ATP5) (1 of 2)	0	209.999	64	17	68	2	245	26.9	9.44	211.6	17	14	2.163	0.531302	106.32	57.1	142.9	15.96	97.04	High	High	Not Found	High	High	High	1		2	3	Present Both	1	GLYMA_15G273900	GLYMA_15G273900	sp|Q96251|ATPO_ARATH	ATP synthase subunit O, mitochondrial GN=atpH	ident:135/245 pos:181/245 query:245 hit:238 align:243 bit:278.9	OK	ATP synthase subunit O, mitochondrial	Oligomycin sensitivity conferral protein (OSCP)	ATPO_ARATH	Q96251	Q93W68; Q9LYR1	OrderedLocusNames=At5g13450	na	Arabidopsis thaliana (Mouse-ear cress)	3702
High	Master Protein	GLYMA_20G177700	K02138 - F-type H+-transporting ATPase subunit d (ATPeF0D, ATP5H, ATP7) (1 of 2)	0	937.03	96	46	463	21	168	19.9	5.29	1763.19	46	27	0.984	0.974587	64.26	102.5	97.5	7.54	36.92	High	High	High	High	High	High	1		3	3	Present Both	1	GLYMA_20G177700	GLYMA_20G177700	sp|Q9FT52|ATP5H_ARATH	ATP synthase subunit d, mitochondrial GN=ATL31	ident:143/168 pos:157/168 query:168 hit:168 align:168 bit:301.6	OK	ATP synthase subunit d, mitochondrial (ATPase subunit d)	na	ATP5H_ARATH	Q9FT52	Q8RW89; Q8W039	OrderedLocusNames=At3g52300	na	Arabidopsis thaliana (Mouse-ear cress)	3702
High	Master Protein	GLYMA_10G213400	K02138 - F-type H+-transporting ATPase subunit d (ATPeF0D, ATP5H, ATP7) (1 of 2)	0	893.303	96	45	460	20	168	19.9	5.2	1718.38	45	0	0.946	0.961313	56.01	108.9	91.1	22.9	19.99	High	High	High	High	High	High	1		3	3	Present Both	1	GLYMA_10G213400	GLYMA_10G213400	sp|Q9FT52|ATP5H_ARATH	ATP synthase subunit d, mitochondrial GN=ATL31	ident:139/168 pos:154/168 query:168 hit:168 align:168 bit:294.7	OK	ATP synthase subunit d, mitochondrial (ATPase subunit d)	na	ATP5H_ARATH	Q9FT52	Q8RW89; Q8W039	OrderedLocusNames=At3g52300	na	Arabidopsis thaliana (Mouse-ear cress)	3702
High	Master Protein	GLYMA_07G002300	K02145 - V-type H+-transporting ATPase subunit A (ATPeV1A, ATP6A) (1 of 2)	0	570.922	47	27	172	3	623	68.7	5.5	704.62	27	26	1.144	0.960306	104.07	124.6	75.4	12.9	126.76	High	High	High	High	High	High	1		3	3	Present Both	1	GLYMA_07G002300	GLYMA_07G002300	sp|O23654|VATA_ARATH	V-type proton ATPase catalytic subunit A GN=VHA-A	ident:581/623 pos:599/623 query:623 hit:623 align:623 bit:1209.1	OK	V-type proton ATPase catalytic subunit A (V-ATPase subunit A)	V-ATPase 69 kDa subunit; Vacuolar H(+)-ATPase subunit A; Vacuolar proton pump subunit alpha	VATA_ARATH	O23654	na	VHA-A	na	Arabidopsis thaliana (Mouse-ear cress)	3702
High	Master Protein	GLYMA_08G224400	K02145 - V-type H+-transporting ATPase subunit A (ATPeV1A, ATP6A) (1 of 2)	0	529.19	47	27	156	3	623	68.7	5.67	641.89	27	0	10.461	0.000702533	85.21	68.1	131.9	23.92	129.47	High	Peak Found	Not Found	High	Not Found	High	1		2	2	Present Both	1	GLYMA_08G224400	GLYMA_08G224400	sp|O23654|VATA_ARATH	V-type proton ATPase catalytic subunit A GN=VHA-A	ident:580/623 pos:599/623 query:623 hit:623 align:623 bit:1208.4	OK	V-type proton ATPase catalytic subunit A (V-ATPase subunit A)	V-ATPase 69 kDa subunit; Vacuolar H(+)-ATPase subunit A; Vacuolar proton pump subunit alpha	VATA_ARATH	O23654	na	VHA-A	na	Arabidopsis thaliana (Mouse-ear cress)	3702
High	Master Protein	GLYMA_09G245700	K02147 - V-type H+-transporting ATPase subunit B (ATPeV1B, ATP6B) (1 of 4)	0	343.779	58	26	114	26	489	54.1	5.06	393.84	26	0	0.898	0.942784	67.27	109	91	38.3	112.83	High	High	High	High	High	High	1		3	3	Present Both	1	GLYMA_09G245700	GLYMA_09G245700	sp|Q9SZN1|VATB2_ARATH	V-type proton ATPase subunit B2 GN=VHA-B2	ident:470/489 pos:479/489 query:489 hit:487 align:489 bit:954.1	OK	V-type proton ATPase subunit B2 (V-ATPase subunit B2)	Vacuolar H(+)-ATPase subunit B isoform 2; Vacuolar proton pump subunit B2	VATB2_ARATH	Q9SZN1	B9DGU0; B9DHP3; Q56W88; Q94AY7	VHA-B2	na	Arabidopsis thaliana (Mouse-ear cress)	3702
High	Master Protein	GLYMA_19G101000	K02148 - V-type H+-transporting ATPase subunit C (ATPeV1C, ATP6C) (1 of 4)	0	103.751	40	11	33	3	377	42.8	6.09	104.64	11	7	1.278	0.899292	125.94	70.4	129.6	59.36	127.98	High	Peak Found	High	High	High	High	1		3	3	Present Both	1	GLYMA_19G101000	GLYMA_19G101000	sp|Q9SDS7|VATC_ARATH	V-type proton ATPase subunit C GN=VHA-C	ident:316/377 pos:347/377 query:377 hit:375 align:377 bit:659.4	OK	V-type proton ATPase subunit C (V-ATPase subunit C)	Vacuolar H(+)-ATPase subunit C; Vacuolar proton pump subunit C	VATC_ARATH	Q9SDS7	na	VHA-C	DET3; VATC	Arabidopsis thaliana (Mouse-ear cress)	3702
High	Master Protein	GLYMA_16G050200	K02148 - V-type H+-transporting ATPase subunit C (ATPeV1C, ATP6C) (1 of 4)	0	88.551	33	10	31	2	384	43.7	6.15	97.19	10	0	2.082	0.689302	102.44	64.9	135.1	35.69	124.21	High	High	High	High	High	High	1		3	3	Present Both	1	GLYMA_16G050200	GLYMA_16G050200	sp|Q9SDS7|VATC_ARATH	V-type proton ATPase subunit C GN=VHA-C	ident:310/384 pos:344/384 query:384 hit:375 align:376 bit:656.8	OK	V-type proton ATPase subunit C (V-ATPase subunit C)	Vacuolar H(+)-ATPase subunit C; Vacuolar proton pump subunit C	VATC_ARATH	Q9SDS7	na	VHA-C	DET3; VATC	Arabidopsis thaliana (Mouse-ear cress)	3702
High	Master Protein	GLYMA_16G146600	K02148 - V-type H+-transporting ATPase subunit C (ATPeV1C, ATP6C) (1 of 4)	0	58.847	30	9	21	2	375	42.5	5.41	66.81	9	1	2.416	0.575674	110.82	69.8	130.2	40.03	132.46	High	High	High	High	High	High	1		3	3	Present Both	1	GLYMA_16G146600	GLYMA_16G146600	sp|Q9SDS7|VATC_ARATH	V-type proton ATPase subunit C GN=VHA-C	ident:305/375 pos:346/375 query:375 hit:375 align:374 bit:656.0	OK	V-type proton ATPase subunit C (V-ATPase subunit C)	Vacuolar H(+)-ATPase subunit C; Vacuolar proton pump subunit C	VATC_ARATH	Q9SDS7	na	VHA-C	DET3; VATC	Arabidopsis thaliana (Mouse-ear cress)	3702
High	Master Protein	GLYMA_08G218500	K02149 - V-type H+-transporting ATPase subunit D (ATPeV1D, ATP6M) (1 of 2)	0	145.573	54	14	35	2	258	28.9	9.57	96.92	14	0	100	6.62973e-17			200			High	Not Found	Not Found	Not Found	Not Found	High	1		1	1	Missing Both	1	GLYMA_08G218500	GLYMA_08G218500	sp|Q9XGM1|VATD_ARATH	V-type proton ATPase subunit D GN=VHA-D	ident:205/258 pos:233/258 query:258 hit:261 align:269 bit:409.1	OK	V-type proton ATPase subunit D (V-ATPase subunit D)	Vacuolar H(+)-ATPase subunit D; Vacuolar proton pump subunit D	VATD_ARATH	Q9XGM1	Q9LXS8	VHA-D	VATD; VATPD	Arabidopsis thaliana (Mouse-ear cress)	3702
High	Master Protein	GLYMA_05G135300	K02151 - V-type H+-transporting ATPase subunit F (ATPeV1F, ATP6S14) (1 of 2)	0	260.324	94	15	106	15	130	14.5	6.57	418.23	15	0	1.589	0.783295	67.37	72.4	127.6	17.77	71.23	High	High	High	High	High	High	1		3	3	Present Both	1	GLYMA_05G135300	GLYMA_05G135300	sp|Q9ZQX4|VATF_ARATH	V-type proton ATPase subunit F GN=VHA-F	ident:109/130 pos:119/130 query:130 hit:128 align:126 bit:231.9	OK	V-type proton ATPase subunit F (V-ATPase subunit F)	V-ATPase 14 kDa subunit; Vacuolar H(+)-ATPase subunit F; Vacuolar proton pump subunit F	VATF_ARATH	Q9ZQX4	na	VHA-F	VATF	Arabidopsis thaliana (Mouse-ear cress)	3702
High	Master Protein	GLYMA_13G139900	K02152 - V-type H+-transporting ATPase subunit G (ATPeV1G, ATP6G) (1 of 4)	0	384.382	94	20	164	4	110	12.2	6.58	677.17	20	17	1.189	0.946873	71.32	92.5	107.5	25.44	64.16	High	High	High	High	High	Peak Found	1		3	3	Present Both	1	GLYMA_13G139900	GLYMA_13G139900	sp|O82628|VATG1_ARATH	V-type proton ATPase subunit G1 GN=VHA-G1	ident:82/110 pos:95/110 query:110 hit:110 align:110 bit:139.8	OK	V-type proton ATPase subunit G1 (V-ATPase subunit G1)	Vacuolar H(+)-ATPase subunit G isoform 1; Vacuolar proton pump subunit G1	VATG1_ARATH	O82628	na	VHA-G1	AVMA10; VAG1; VATG1; VMA10	Arabidopsis thaliana (Mouse-ear cress)	3702
High	Master Protein	GLYMA_10G052700	K02152 - V-type H+-transporting ATPase subunit G (ATPeV1G, ATP6G) (1 of 4)	0	376.634	94	18	171	7	110	12.2	7.42	727.18	18	0	1.04	0.998965	76.99	102	98	42.37	68.6	High	High	High	High	High	High	1		3	3	Present Both	1	GLYMA_10G052700	GLYMA_10G052700	sp|O82628|VATG1_ARATH	V-type proton ATPase subunit G1 GN=VHA-G1	ident:83/110 pos:96/110 query:110 hit:110 align:110 bit:144.8	OK	V-type proton ATPase subunit G1 (V-ATPase subunit G1)	Vacuolar H(+)-ATPase subunit G isoform 1; Vacuolar proton pump subunit G1	VATG1_ARATH	O82628	na	VHA-G1	AVMA10; VAG1; VATG1; VMA10	Arabidopsis thaliana (Mouse-ear cress)	3702
High	Master Protein	GLYMA_03G180700	K02152 - V-type H+-transporting ATPase subunit G (ATPeV1G, ATP6G) (1 of 4)	0	239.695	75	14	119	5	110	12.3	7.5	509.49	14	0	1.113	0.972386	59.21	95.2	104.8	26.2	64.79	High	High	High	High	High	High	1		3	3	Present Both	1	GLYMA_03G180700	GLYMA_03G180700	sp|O82628|VATG1_ARATH	V-type proton ATPase subunit G1 GN=VHA-G1	ident:84/110 pos:94/110 query:110 hit:110 align:110 bit:142.5	OK	V-type proton ATPase subunit G1 (V-ATPase subunit G1)	Vacuolar H(+)-ATPase subunit G isoform 1; Vacuolar proton pump subunit G1	VATG1_ARATH	O82628	na	VHA-G1	AVMA10; VAG1; VATG1; VMA10	Arabidopsis thaliana (Mouse-ear cress)	3702
High	Master Protein	GLYMA_11G113400	K02154 - V-type H+-transporting ATPase subunit a (ATPeV0A, ATP6N) (1 of 7)	0	80.594	14	9	14	9	818	92.9	6.18	34.09	9	0	2.643	0.342704	122.64	111.4	88.6	15.46	161.2	High	High	Peak Found	Peak Found	Peak Found	High	1		3	3	Present Both	1	GLYMA_11G113400	GLYMA_11G113400	sp|Q8W4S4|VHAA3_ARATH	V-type proton ATPase subunit a3 GN=VHA-a3	ident:633/818 pos:730/818 query:818 hit:821 align:808 bit:1317.8	OK	V-type proton ATPase subunit a3 (V-ATPase subunit a3)	V-type proton ATPase 95 kDa subunit a isoform 3 (V-ATPase 95 kDa isoform a3); Vacuolar H(+)-ATPase subunit a isoform 3; Vacuolar proton pump subunit a3; Vacuolar proton translocating ATPase 95 kDa subunit a isoform 3	VHAA3_ARATH	Q8W4S4	Q0WLI9; Q42216; Q56WQ9; Q9SVI5	VHA-a3	na	Arabidopsis thaliana (Mouse-ear cress)	3702
High	Master Protein	GLYMA_12G039200	K02212 - DNA replication licensing factor MCM4 (MCM4, CDC54) (1 of 2)	0	8.498	1	1	5	1	839	93.2	6.13	13.65	1	0	1.423	0.84782	41.54	82.5	117.5	23.52	37.05	High	High	Peak Found	Peak Found	High	High	1		3	3	Present Both	1	GLYMA_12G039200	GLYMA_12G039200	sp|Q0WVF5|MCM4_ARATH	DNA replication licensing factor MCM4 GN=MCM4	ident:640/839 pos:727/839 query:839 hit:847 align:854 bit:1261.1	OK	DNA replication licensing factor MCM4	Minichromosome maintenance protein 4 (AtMCM4)	MCM4_ARATH	Q0WVF5	Q9SIV8	MCM4	na	Arabidopsis thaliana (Mouse-ear cress)	3702
High	Master Protein	GLYMA_12G082300	K02219 - cyclin-dependent kinase regulatory subunit CKS1 (CKS1) (1 of 3)	0	17.849	32	4	16	4	88	10.6	9.09	30.96	4	0	1.124	0.970588	88.72	108.8	91.2	1.31	71.25	High	High	High	High	High	High	1		3	3	Present Both	1	GLYMA_12G082300	GLYMA_12G082300	sp|O23249|CKS1_ARATH	Cyclin-dependent kinases regulatory subunit 1 GN=CKS1	ident:84/88 pos:87/88 query:88 hit:87 align:88 bit:174.1	OK	Cyclin-dependent kinases regulatory subunit 1	CKS1-At	CKS1_ARATH	O23249	na	CKS1	na	Arabidopsis thaliana (Mouse-ear cress)	3702
High	Master Protein	GLYMA_09G040100	K02261 - cytochrome c oxidase subunit 2 (COX2) (1 of 1)	0	5.711	3	1	4	1	376	42.3	6.67	10.47	1	0	1.848	0.679752	92.63	70.2	129.8	12.11	73.46	High	High	Peak Found	High	High	Peak Found	1		3	3	Present Both	1	GLYMA_09G040100	GLYMA_09G040100	sp|P93285|COX2_ARATH	Cytochrome c oxidase subunit 2 GN=COX2	ident:217/376 pos:232/376 query:376 hit:260 align:244 bit:464.2	OK	Cytochrome c oxidase subunit 2	Cytochrome c oxidase polypeptide II	COX2_ARATH	P93285	na	COX2	COXII	Arabidopsis thaliana (Mouse-ear cress)	3702
High	Master Protein	GLYMA_17G157000	K02266 - cytochrome c oxidase subunit 6a (COX6A) (1 of 2)	0	127.172	36	5	47	1	102	11.6	9.35	173.59	5	0	1.133	0.963074	39.4	89	111	48.57	16.57	High	Peak Found	High	High	High	Not Found	1		3	2	Present Both	1	GLYMA_17G157000	GLYMA_17G157000	sp|Q9T070|COX6A_ARATH	Cytochrome c oxidase subunit 6a, mitochondrial GN=COX6A	ident:70/102 pos:81/102 query:102 hit:102 align:102 bit:154.5	OK	Cytochrome c oxidase subunit 6a, mitochondrial (AtCOX6a)	na	COX6A_ARATH	Q9T070	Q8L974	COX6A	na	Arabidopsis thaliana (Mouse-ear cress)	3702
High	Master Protein	GLYMA_05G110100	K02266 - cytochrome c oxidase subunit 6a (COX6A) (1 of 2)	0	119.552	36	5	52	1	102	11.5	9.09	201.33	5	4	1.528	0.804759	67.95	80.7	119.3	15.09	31.9	High	High	High	High	High	Not Found	1		3	2	Present Both	1	GLYMA_05G110100	GLYMA_05G110100	sp|Q9T070|COX6A_ARATH	Cytochrome c oxidase subunit 6a, mitochondrial GN=COX6A	ident:71/102 pos:83/102 query:102 hit:102 align:102 bit:156.4	OK	Cytochrome c oxidase subunit 6a, mitochondrial (AtCOX6a)	na	COX6A_ARATH	Q9T070	Q8L974	COX6A	na	Arabidopsis thaliana (Mouse-ear cress)	3702
High	Master Protein	GLYMA_02G208900	K02267 - cytochrome c oxidase subunit 6b (COX6B) (1 of 5)	0	59.96	42	7	23	4	174	19.4	4.42	71.56	7	3	0.945	0.960306	52.85	78.2	121.8	34.07	27.75	High	High	Peak Found	High	High	High	1		3	3	Present Both	1	GLYMA_02G208900	GLYMA_02G208900	sp|Q9S7L9|CX6B1_ARATH	Cytochrome c oxidase subunit 6b-1 GN=COX6B-1	ident:113/174 pos:129/174 query:174 hit:191 align:182 bit:184.1	OK	Cytochrome c oxidase subunit 6b-1 (AtCOX6b-1)	na	CX6B1_ARATH	Q9S7L9	Q8LCP1	COX6B-1	na	Arabidopsis thaliana (Mouse-ear cress)	3702
High	Master Protein	GLYMA_14G177100	K02267 - cytochrome c oxidase subunit 6b (COX6B) (1 of 5)	0	36.453	32	6	20	3	175	19.5	4.39	48.31	6	0	1.323	0.880138	66.89	92.9	107.1	22.38	51.43	High	High	Peak Found	Peak Found	High	High	1		3	3	Present Both	1	GLYMA_14G177100	GLYMA_14G177100	sp|Q9S7L9|CX6B1_ARATH	Cytochrome c oxidase subunit 6b-1 GN=COX6B-1	ident:113/175 pos:133/175 query:175 hit:191 align:191 bit:186.4	OK	Cytochrome c oxidase subunit 6b-1 (AtCOX6b-1)	na	CX6B1_ARATH	Q9S7L9	Q8LCP1	COX6B-1	na	Arabidopsis thaliana (Mouse-ear cress)	3702
High	Master Protein	GLYMA_13G090900	K02267 - cytochrome c oxidase subunit 6b (COX6B) (1 of 5)	0	28.741	45	5	30	4	77	9.1	7.21	59.25	5	0	0.912	0.951243	49.65	101.9	98.1	25.1	32.17	High	High	High	High	High	High	1		3	3	Present Both	1	GLYMA_13G090900	GLYMA_13G090900	sp|Q945L0|CX6B2_ARATH	Cytochrome c oxidase subunit 6b-2 GN=COX6B-2	ident:67/77 pos:71/77 query:77 hit:78 align:75 bit:147.5	OK	Cytochrome c oxidase subunit 6b-2 (AtCOX6b-2)	na	CX6B2_ARATH	Q945L0	Q8LD51	COX6B-2	na	Arabidopsis thaliana (Mouse-ear cress)	3702
High	Master Protein	GLYMA_09G193300	K02357 - elongation factor Ts (tsf, TSFM) (1 of 1)	0	6.181	2	2	6	2	1135	122.7	4.75	10.93	2	0	0.592	0.671207	14.71	129.6	70.4	14.6	16.37	High	High	High	High	High	Peak Found	1		3	3	Present Both	1	GLYMA_09G193300	GLYMA_09G193300	sp|Q5XF75|EFTS_ARATH	Elongation factor Ts, mitochondrial GN=EFTS	ident:47/1135 pos:60/1135 query:1135 hit:395 align:92 bit:85.5	Partial_match_both	Elongation factor Ts, mitochondrial (EF-Ts; EF-TsMt)	na	EFTS_ARATH	Q5XF75	O82505; Q9T015	EFTS	na	Arabidopsis thaliana (Mouse-ear cress)	3702
High	Master Protein	GLYMA_04G188700	K02358 - elongation factor Tu (tuf, TUFM) (1 of 8)	0	243.279	29	15	66	5	480	52.2	6.68	284.85	15	9	0.435	0.409345	12.4	144.5	55.5	42.24	20.8	High	High	High	High	High	Peak Found	1		3	3	Present Both	1	GLYMA_04G188700	GLYMA_04G188700	sp|P17745|EFTU_ARATH	Elongation factor Tu, chloroplastic GN=TUFA	ident:392/480 pos:425/480 query:480 hit:476 align:468 bit:771.5	OK	Elongation factor Tu, chloroplastic (EF-Tu)	Ras-related protein RABE1b (AtRABE1b); Ras-related protein Rab8D (AtRab8D)	EFTU_ARATH	P17745	Q8GTE7	TUFA	RAB8D; RABE1B	Arabidopsis thaliana (Mouse-ear cress)	3702
High	Master Protein	GLYMA_05G041900	K02358 - elongation factor Tu (tuf, TUFM) (1 of 8)	0	153.648	22	11	43	1	479	52.5	6.81	171.03	11	0	0.45	0.49583	8.68	137.9	62.1	30.22	47.84	High	High	Not Found	High	High	Not Found	1		2	2	Present Both	1	GLYMA_05G041900	GLYMA_05G041900	sp|P17745|EFTU_ARATH	Elongation factor Tu, chloroplastic GN=TUFA	ident:388/479 pos:424/479 query:479 hit:476 align:460 bit:775.0	OK	Elongation factor Tu, chloroplastic (EF-Tu)	Ras-related protein RABE1b (AtRABE1b); Ras-related protein Rab8D (AtRab8D)	EFTU_ARATH	P17745	Q8GTE7	TUFA	RAB8D; RABE1B	Arabidopsis thaliana (Mouse-ear cress)	3702
High	Master Protein	GLYMA_05G019600	K02518 - translation initiation factor IF-1 (infA) (1 of 2)	0	104.389	28	6	23	6	143	16	10.27	94.93	6	0	0.395	0.319041	5.18	141.1	58.9	28.9	8.05	High	High	High	High	High	Peak Found	1		3	3	Present Both	1	GLYMA_05G019600	GLYMA_05G019600	sp|O82499|IF1C_ARATH	Translation initiation factor IF-1, chloroplastic GN=IDD5	ident:64/143 pos:79/143 query:143 hit:141 align:134 bit:113.6	Poor_match	Translation initiation factor IF-1, chloroplastic	na	IF1C_ARATH	O82499	Q56YK9; Q8GY59; Q9T016	OrderedLocusNames=At4g11175	na	Arabidopsis thaliana (Mouse-ear cress)	3702
High	Master Protein	GLYMA_17G072300	K02520 - translation initiation factor IF-3 (infC, MTIF3) (1 of 5)	0	14.182	14	3	8	3	275	30.8	9.11	20.29	3	0	0.488	0.520137	11.31	135.4	64.6	68.58	71.33	High	High	Peak Found	High	Peak Found	Not Found	1		3	2	Present Both	1	GLYMA_17G072300	GLYMA_17G072300	sp|Q94B52|IF34_ARATH	Translation initiation factor IF3-4, chloroplastic GN=IF3-4	ident:164/275 pos:204/275 query:275 hit:281 align:280 bit:270.8	OK	Translation initiation factor IF3-4, chloroplastic (AtIF3-4)	AtINFC-4; Protein SVR9-LIKE 1	IF34_ARATH	Q94B52	Q9SUH7	IF3-4	na	Arabidopsis thaliana (Mouse-ear cress)	3702
High	Master Protein	GLYMA_12G232900	K02634 - apocytochrome f (petA) (1 of 1)	0	180.514	39	19	53	19	320	35.3	8.82	172.95	19	0	0.644	0.73845	17.81	131	69	15.61	59.56	High	High	High	High	High	Peak Found	1		3	3	Present Both	1	GLYMA_12G232900	GLYMA_12G232900	sp|P56771|CYF_ARATH	Cytochrome f GN=petA	ident:282/320 pos:299/320 query:320 hit:320 align:320 bit:578.6	OK	Cytochrome f	na	CYF_ARATH	P56771	na	petA	na	Arabidopsis thaliana (Mouse-ear cress)	3702
High	Master Protein	GLYMA_10G249000	K02692 - photosystem I subunit II (psaD) (1 of 2)	0	518.571	70	27	240	3	210	23	9.61	973.59	27	29	0.575	0.653539	20.97	124.9	75.1	11.87	84.43	High	High	High	High	High	Not Found	1		3	2	Present Both	1	GLYMA_10G249000	GLYMA_10G249000	sp|Q9SA56|PSAD2_ARATH	Photosystem I reaction center subunit II-2, chloroplastic GN=PSAD2	ident:156/210 pos:174/210 query:210 hit:204 align:210 bit:306.2	OK	Photosystem I reaction center subunit II-2, chloroplastic	Photosystem I 20 kDa subunit 2 (PSI-D2)	PSAD2_ARATH	Q9SA56	Q9SUI3	PSAD2	na	Arabidopsis thaliana (Mouse-ear cress)	3702
High	Master Protein	GLYMA_10G042000	K02693 - photosystem I subunit IV (psaE) (1 of 4)	0	307.156	52	13	269	3	172	18.7	9.99	986.09	13	9	0.604	0.686947	16.64	135.3	64.7	19.17	92.92	High	High	High	High	High	Not Found	1		3	2	Present Both	1	GLYMA_10G042000	GLYMA_10G042000	sp|Q9S714|PSAE2_ARATH	Photosystem I reaction center subunit IV B, chloroplastic GN=PSAE2	ident:84/172 pos:103/172 query:172 hit:145 align:143 bit:132.1	Poor_match	Photosystem I reaction center subunit IV B, chloroplastic (PSI-E B)	na	PSAE2_ARATH	Q9S714	na	PSAE2	na	Arabidopsis thaliana (Mouse-ear cress)	3702
High	Master Protein	GLYMA_13G129400	K02693 - photosystem I subunit IV (psaE) (1 of 4)	0	250.468	67	12	256	2	129	13.8	9.6	916.23	12	0	0.791	0.866034	17.92	119.1	80.9	17.8	11.13	High	High	High	High	High	Not Found	1		3	2	Present Both	1	GLYMA_13G129400	GLYMA_13G129400	sp|Q9S714|PSAE2_ARATH	Photosystem I reaction center subunit IV B, chloroplastic GN=PSAE2	ident:80/129 pos:99/129 query:129 hit:145 align:143 bit:132.1	OK	Photosystem I reaction center subunit IV B, chloroplastic (PSI-E B)	na	PSAE2_ARATH	Q9S714	na	PSAE2	na	Arabidopsis thaliana (Mouse-ear cress)	3702
High	Master Protein	GLYMA_05G022900	K02694 - photosystem I subunit III (psaF) (1 of 1)	0	57.702	28	7	24	7	224	24.3	9.72	76.18	7	0	0.643	0.73785	22.56	112.7	87.3	40.97	46.5	High	High	High	High	High	Not Found	1		3	2	Present Both	1	GLYMA_05G022900	GLYMA_05G022900	sp|Q9SHE8|PSAF_ARATH	Photosystem I reaction center subunit III, chloroplastic GN=PSAF	ident:165/224 pos:188/224 query:224 hit:221 align:227 bit:330.9	OK	Photosystem I reaction center subunit III, chloroplastic	Light-harvesting complex I 17 kDa protein; PSI-F	PSAF_ARATH	Q9SHE8	Q941C1; Q9SUI8	PSAF	na	Arabidopsis thaliana (Mouse-ear cress)	3702
High	Master Protein	GLYMA_13G357300	K02695 - photosystem I subunit VI (psaH) (1 of 5)	0	101.576	59	7	39	4	139	14.8	9.99	162.04	7	0	0.799	0.871521	33.07	124.8	75.2	57.33	89.14	High	High	High	High	High	Not Found	1		3	2	Present Both	1	GLYMA_13G357300	GLYMA_13G357300	sp|Q9SUI6|PSAH2_ARATH	Photosystem I reaction center subunit VI-2, chloroplastic GN=PSAH2	ident:114/139 pos:126/139 query:139 hit:145 align:145 bit:223.0	OK	Photosystem I reaction center subunit VI-2, chloroplastic	PSI-H1	PSAH2_ARATH	Q9SUI6	na	PSAH2	na	Arabidopsis thaliana (Mouse-ear cress)	3702
High	Master Protein	GLYMA_07G019700	K02695 - photosystem I subunit VI (psaH) (1 of 5)	0	99.122	55	7	45	2	150	15.9	9.91	198.69	7	5	0.762	0.852675	41.15	116.6	83.4	21.6	42.94	High	High	High	High	High	Not Found	1		3	2	Present Both	1	GLYMA_07G019700	GLYMA_07G019700	sp|Q9SUI6|PSAH2_ARATH	Photosystem I reaction center subunit VI-2, chloroplastic GN=PSAH2	ident:118/150 pos:128/150 query:150 hit:145 align:151 bit:231.5	OK	Photosystem I reaction center subunit VI-2, chloroplastic	PSI-H1	PSAH2_ARATH	Q9SUI6	na	PSAH2	na	Arabidopsis thaliana (Mouse-ear cress)	3702
High	Master Protein	GLYMA_15G016300	K02695 - photosystem I subunit VI (psaH) (1 of 5)	0	84.402	58	6	28	3	139	14.9	9.99	115.67	6	0	1.105	0.972386	47.31	82.8	117.2	43.96		High	High	Peak Found	High	High	Not Found	1		3	2	Present Both	1	GLYMA_15G016300	GLYMA_15G016300	sp|Q9SUI6|PSAH2_ARATH	Photosystem I reaction center subunit VI-2, chloroplastic GN=PSAH2	ident:113/139 pos:126/139 query:139 hit:145 align:145 bit:223.0	OK	Photosystem I reaction center subunit VI-2, chloroplastic	PSI-H1	PSAH2_ARATH	Q9SUI6	na	PSAH2	na	Arabidopsis thaliana (Mouse-ear cress)	3702
High	Master Protein	GLYMA_09G087700	K02698 - photosystem I subunit X (psaK) (1 of 2)	0	14.231	15	3	10	3	132	13.5	10.13	27.92	3	0	0.701	0.800483	40.29	106.4	93.6	53.75	63.51	High	High	High	High	High	Not Found	1		3	2	Present Both	1	GLYMA_09G087700	GLYMA_09G087700	sp|Q9SUI5|PSAK_ARATH	Photosystem I reaction center subunit psaK, chloroplastic GN=PSAK	ident:110/132 pos:121/132 query:132 hit:130 align:133 bit:211.1	OK	Photosystem I reaction center subunit psaK, chloroplastic	PSI-K; Photosystem I subunit X	PSAK_ARATH	Q9SUI5	Q9C8G7	PSAK	na	Arabidopsis thaliana (Mouse-ear cress)	3702
High	Master Protein	GLYMA_09G250800	K02699 - photosystem I subunit XI (psaL) (1 of 2)	0	2.832	4	1	5	1	214	22.8	9.47	11.58	1	0	0.664	0.766573	8.05	122.6	77.4	14.45	18.16	High	High	High	High	High	Not Found	1		3	2	Present Both	1	GLYMA_09G250800	GLYMA_09G250800	sp|Q9SUI4|PSAL_ARATH	Photosystem I reaction center subunit XI, chloroplastic GN=PSAL	ident:169/214 pos:192/214 query:214 hit:219 align:218 bit:292.0	OK	Photosystem I reaction center subunit XI, chloroplastic (PSI-L)	PSI subunit V	PSAL_ARATH	Q9SUI4	Q9ST32; Q9SU06	PSAL	na	Arabidopsis thaliana (Mouse-ear cress)	3702
High	Master Protein	GLYMA_13G028200	K02703 - photosystem II P680 reaction center D1 protein (psbA) (1 of 3)	0	76.512	8	3	43	3	271	29.8	5.14	131.58	3	0	0.327	0.179731	8.79	145	55	2.46	69.9	High	High	High	High	High	Not Found	1		3	2	Present Both	1	GLYMA_13G028200	GLYMA_13G028200	sp|P83755|PSBA_ARATH	Photosystem II protein D1 GN=psbA	ident:257/271 pos:263/271 query:271 hit:353 align:295 bit:511.1	OK	Photosystem II protein D1 (PSII D1 protein)	Photosystem II Q(B) protein	PSBA_ARATH	P83755	Q33592	psbA	na	Arabidopsis thaliana (Mouse-ear cress)	3702
High	Master Protein	GLYMA_01G153500	K02706 - photosystem II P680 reaction center D2 protein (psbD) (1 of 2)	0	32.787	7	2	6	2	249	27.9	6.18	26.85	2	0	0.669	0.804759	21.23	124.1	75.9	17.26		High	High	Not Found	High	Not Found	Not Found	1		2	1	Only Control	1	GLYMA_01G153500	GLYMA_01G153500	sp|P56761|PSBD_ARATH	Photosystem II D2 protein GN=psbD	ident:212/249 pos:216/249 query:249 hit:353 align:248 bit:423.3	OK	Photosystem II D2 protein (PSII D2 protein)	Photosystem Q(A) protein	PSBD_ARATH	P56761	na	psbD	na	Arabidopsis thaliana (Mouse-ear cress)	3702
High	Master Protein	GLYMA_04G095000	K02706 - photosystem II P680 reaction center D2 protein (psbD) (1 of 2)	0	6.36	7	1	3	1	149	16.7	4.5	8.42	1	0	0.625	0.744349	25.39	114.1	85.9	33.35	70.82	High	Peak Found	High	Peak Found	High	Not Found	1		3	2	Present Both	1	GLYMA_04G095000	GLYMA_04G095000	sp|P56761|PSBD_ARATH	Photosystem II D2 protein GN=psbD	ident:141/149 pos:141/149 query:149 hit:353 align:149 bit:290.4	Partial_match_hit	Photosystem II D2 protein (PSII D2 protein)	Photosystem Q(A) protein	PSBD_ARATH	P56761	na	psbD	na	Arabidopsis thaliana (Mouse-ear cress)	3702
High	Master Protein	GLYMA_12G232700	K02707 - photosystem II cytochrome b559 subunit alpha (psbE) (1 of 2)	0	9.68	13	2	10	2	142	16	5.05	25.48	2	0	0.461	0.468153	16.6	141.6	58.4	78.79	143.44	High	High	High	High	High	Peak Found	1		3	3	Present Both	1	GLYMA_12G232700	GLYMA_12G232700	sp|P56779|PSBE_ARATH	Cytochrome b559 subunit alpha GN=psbE	ident:78/142 pos:79/142 query:142 hit:83 align:81 bit:161.4	OK	Cytochrome b559 subunit alpha	PSII reaction center subunit V	PSBE_ARATH	P56779	Q8HS06	psbE	na	Arabidopsis thaliana (Mouse-ear cress)	3702
High	Master Protein	GLYMA_03G065000	K02709 - photosystem II PsbH protein (psbH) (1 of 2)	0	50.974	23	2	20	2	73	7.8	4.55	66.77	2	0	0.806	0.874801	52.36	103.8	96.2	34.03	80.36	High	High	High	High	High	Not Found	1		3	2	Present Both	1	GLYMA_03G065000	GLYMA_03G065000	sp|P56780|PSBH_ARATH	Photosystem II reaction center protein H GN=psbH	ident:58/73 pos:62/73 query:73 hit:73 align:73 bit:117.5	OK	Photosystem II reaction center protein H (PSII-H)	Photosystem II 10 kDa phosphoprotein	PSBH_ARATH	P56780	na	psbH	na	Arabidopsis thaliana (Mouse-ear cress)	3702
High	Master Protein	GLYMA_11G061300	K02716 - photosystem II oxygen-evolving enhancer protein 1 (psbO) (1 of 4)	0	932.822	62	39	835	8	329	34.8	5.67	2898.14	39	31	0.634	0.729328	26.17	117.8	82.2	4.46	91.63	High	High	High	High	High	High	1		3	3	Present Both	1	GLYMA_11G061300	GLYMA_11G061300	sp|P23321|PSBO1_ARATH	Oxygen-evolving enhancer protein 1-1, chloroplastic GN=PSBO1	ident:260/329 pos:294/329 query:329 hit:332 align:332 bit:540.4	OK	Oxygen-evolving enhancer protein 1-1, chloroplastic (OEE1)	33 kDa subunit of oxygen evolving system of photosystem II; 33 kDa thylakoid membrane protein; Manganese-stabilizing protein 1 (MSP-1); OEC 33 kDa subunit	PSBO1_ARATH	P23321	O81917; Q41998; Q8L7F1; Q8LAT1; Q93Y28; Q93ZP8; Q94JV7	PSBO1	PSBO	Arabidopsis thaliana (Mouse-ear cress)	3702
High	Master Protein	GLYMA_01G180800	K02716 - photosystem II oxygen-evolving enhancer protein 1 (psbO) (1 of 4)	0	900.41	62	38	871	8	329	34.8	6.77	2963.94	38	3	0.713	0.808299	21.77	120.9	79.1	15.14	97.98	High	High	High	High	High	High	1		3	3	Present Both	1	GLYMA_01G180800	GLYMA_01G180800	sp|Q9S841|PSBO2_ARATH	Oxygen-evolving enhancer protein 1-2, chloroplastic GN=PSBO2	ident:259/329 pos:295/329 query:329 hit:331 align:331 bit:535.4	OK	Oxygen-evolving enhancer protein 1-2, chloroplastic (OEE1)	33 kDa subunit of oxygen evolving system of photosystem II; 33 kDa thylakoid membrane protein; Manganese-stabilizing protein 2 (MSP-2); OEC 33 kDa subunit	PSBO2_ARATH	Q9S841	na	PSBO2	na	Arabidopsis thaliana (Mouse-ear cress)	3702
High	Master Protein	GLYMA_02G061100	K02716 - photosystem II oxygen-evolving enhancer protein 1 (psbO) (1 of 4)	0	846.595	62	38	814	9	326	34.6	6.32	2764.66	38	0	0.77	0.854734	24.87	125.1	74.9	5.11	93.69	High	High	High	High	High	Peak Found	1		3	3	Present Both	1	GLYMA_02G061100	GLYMA_02G061100	sp|Q9S841|PSBO2_ARATH	Oxygen-evolving enhancer protein 1-2, chloroplastic GN=PSBO2	ident:258/326 pos:292/326 query:326 hit:331 align:332 bit:533.9	OK	Oxygen-evolving enhancer protein 1-2, chloroplastic (OEE1)	33 kDa subunit of oxygen evolving system of photosystem II; 33 kDa thylakoid membrane protein; Manganese-stabilizing protein 2 (MSP-2); OEC 33 kDa subunit	PSBO2_ARATH	Q9S841	na	PSBO2	na	Arabidopsis thaliana (Mouse-ear cress)	3702
High	Master Protein	GLYMA_01G105500	K02726 - 20S proteasome subunit alpha 2 (PSMA2) (1 of 4)	0	10.745	20	3	4	3	235	25.6	5.68	8.92	3	0	1.767	0.807637	56.04	84.3	115.7	38.88	112.38	High	High	Peak Found	High	Peak Found	High	1		3	3	Present Both	1	GLYMA_01G105500	GLYMA_01G105500	sp|O23708|PSA2A_ARATH	Proteasome subunit alpha type-2-A GN=PAB1	ident:220/235 pos:226/235 query:235 hit:235 align:235 bit:450.7	OK	Proteasome subunit alpha type-2-A	20S proteasome alpha subunit B-1; Proteasome component 3	PSA2A_ARATH	O23708	B9DGA9; Q94EI0	PAB1	PRC3	Arabidopsis thaliana (Mouse-ear cress)	3702
High	Master Protein	GLYMA_16G126200	K02731 - 20S proteasome subunit alpha 4 (PSMA7) (1 of 3)	0	50.065	33	5	13	5	249	27.2	7.44	47	5	0	1.147	0.960306	81.19	63.7	136.3	41.09	55.58	High	High	High	High	High	High	1		3	3	Present Both	1	GLYMA_16G126200	GLYMA_16G126200	sp|O24616|PSA7B_ARATH	Proteasome subunit alpha type-7-B GN=PAD2	ident:230/249 pos:242/249 query:249 hit:250 align:250 bit:445.3	OK	Proteasome subunit alpha type-7-B	20S proteasome alpha subunit D-2; Proteasome component 6B; Proteasome component 6C; Proteasome subunit alpha type-4	PSA7B_ARATH	O24616	Q0WTK1; Q84W05	PAD2	PRC6B; PRC6C; PRS1	Arabidopsis thaliana (Mouse-ear cress)	3702
High	Master Protein	GLYMA_02G147000	K02838 - ribosome recycling factor (frr, MRRF, RRF) (1 of 2)	0	43.494	26	6	17	6	261	29	9.57	43.6	6	0	1.096	0.972386	26.24	115.9	84.1	48.03	39.47	High	High	High	High	High	Peak Found	1		3	3	Present Both	1	GLYMA_02G147000	GLYMA_02G147000	sp|Q9M1X0|RRFC_ARATH	Ribosome-recycling factor, chloroplastic GN=RRF	ident:176/261 pos:216/261 query:261 hit:275 align:275 bit:333.2	OK	Ribosome-recycling factor, chloroplastic (RRF)	CpFrr; RRFHCP; Ribosome-releasing factor, chloroplastic	RRFC_ARATH	Q9M1X0	Q93V42	RRF	na	Arabidopsis thaliana (Mouse-ear cress)	3702
High	Master Protein	GLYMA_09G228500	K03008 - DNA-directed RNA polymerase II subunit RPB11 (RPB11, POLR2J) (1 of 3)	0	17.535	25	3	3	3	116	13.6	7.64	9.05	3	0	0.632	0.748413	31.56	103.4	96.6	23.13	90.24	High	Peak Found	Not Found	High	Not Found	High	1		2	2	Present Both	1	GLYMA_09G228500	GLYMA_09G228500	sp|Q38859|NRPBB_ARATH	DNA-directed RNA polymerases II, IV and V subunit 11 GN=NRPB11	ident:98/116 pos:111/116 query:116 hit:116 align:116 bit:213.4	OK	DNA-directed RNA polymerases II, IV and V subunit 11	DNA-directed RNA polymerase II 13.6 kDa polypeptide; DNA-directed RNA polymerase II subunit J; DNA-directed RNA polymerase II subunit RPB11 (RNA polymerase II subunit B11)	NRPBB_ARATH	Q38859	na	NRPB11	NRPD11; NRPE11; RPB13.6	Arabidopsis thaliana (Mouse-ear cress)	3702
High	Master Protein	GLYMA_10G234800	K03023 - DNA-directed RNA polymerase III subunit RPC3 (RPC3, POLR3C) (1 of 3)	0.003	2.268	2	1	12	1	518	59.3	8.03	24.05	1	0	1.336	0.87433	100.48	85.6	114.4	10.67	108.97	High	High	High	High	High	High	1		3	3	Present Both	1	GLYMA_10G234800	GLYMA_10G234800	sp|Q9M302|PP270_ARATH	Pentatricopeptide repeat-containing protein At3g48810 GN=PCMP-H76	ident:53/518 pos:88/518 query:518 hit:659 align:206 bit:33.5	Partial_match_both	Pentatricopeptide repeat-containing protein At3g48810	na	PP270_ARATH	Q9M302	na	OrderedLocusNames=At3g48810	na	Arabidopsis thaliana (Mouse-ear cress)	3702
High	Master Protein	GLYMA_06G289400	K03028 - 26S proteasome regulatory subunit N1 (PSMD2, RPN1) (1 of 2)	0	16.812	3	2	3	2	885	97.3	5.19	8.86	2	0	3.631	0.507476	24.82	60	140	38		High	High	Not Found	Not Found	Not Found	Peak Found	1		2	1	Only Control	1	GLYMA_06G289400	GLYMA_06G289400	sp|Q9SIV2|PSD2A_ARATH	26S proteasome non-ATPase regulatory subunit 2 homolog A GN=RPN1A	ident:750/885 pos:833/885 query:885 hit:891 align:896 bit:1517.7	OK	26S proteasome non-ATPase regulatory subunit 2 homolog A	26S proteasome regulatory subunit RPN1a (AtRPN1a); 26S proteasome regulatory subunit S2 homolog A	PSD2A_ARATH	Q9SIV2	Q56ZR0; Q9C5J1	RPN1A	na	Arabidopsis thaliana (Mouse-ear cress)	3702
High	Master Protein	GLYMA_08G048800	K03032 - 26S proteasome regulatory subunit N2 (PSMD1, RPN2) (1 of 2)	0	25.662	5	3	9	3	1006	109.5	5.36	19.69	3	0	0.397	0.371275	4.9	144.7	55.3	16.79	131.84	High	High	Not Found	High	Peak Found	High	1		2	3	Present Both	1	GLYMA_08G048800	GLYMA_08G048800	sp|O48844|PSD1A_ARATH	26S proteasome non-ATPase regulatory subunit 1 homolog A GN=RPN2A	ident:860/1006 pos:913/1006 query:1006 hit:1004 align:1009 bit:1703.0	OK	26S proteasome non-ATPase regulatory subunit 1 homolog A	26S proteasome regulatory subunit RPN2a (AtRPN2a); 26S proteasome regulatory subunit S1 homolog A	PSD1A_ARATH	O48844	Q570D7; Q6XJG7	RPN2A	na	Arabidopsis thaliana (Mouse-ear cress)	3702
High	Master Protein	GLYMA_05G241500	K03032 - 26S proteasome regulatory subunit N2 (PSMD1, RPN2) (1 of 2)	0	3.704	1	1	5	1	1006	109.4	5.29	3.94	1	0	1.179	0.992627	255.19	91.8	108.2	10.24	124.42	High	High	Not Found	Peak Found	Not Found	High	1		2	2	Present Both	1	GLYMA_05G241500	GLYMA_05G241500	sp|O48844|PSD1A_ARATH	26S proteasome non-ATPase regulatory subunit 1 homolog A GN=RPN2A	ident:852/1006 pos:904/1006 query:1006 hit:1004 align:1009 bit:1688.3	OK	26S proteasome non-ATPase regulatory subunit 1 homolog A	26S proteasome regulatory subunit RPN2a (AtRPN2a); 26S proteasome regulatory subunit S1 homolog A	PSD1A_ARATH	O48844	Q570D7; Q6XJG7	RPN2A	na	Arabidopsis thaliana (Mouse-ear cress)	3702
High	Master Protein	GLYMA_14G071000	K03064 - 26S proteasome regulatory subunit T4 (PSMC6, RPT4) (1 of 6)	0	17.235	12	4	5	3	399	44.6	8.19	9.43	4	1	2.891	0.2739	61.23	59.1	140.9	1.41	53.51	High	Peak Found	Not Found	Peak Found	Peak Found	High	1		2	3	Present Both	1	GLYMA_14G071000	GLYMA_14G071000	sp|Q9SEI3|PS10A_ARATH	26S proteasome regulatory subunit 10B homolog A GN=RPT4A	ident:371/399 pos:386/399 query:399 hit:399 align:399 bit:763.1	OK	26S proteasome regulatory subunit 10B homolog A	26S proteasome AAA-ATPase subunit RPT4a; 26S proteasome subunit 10B homolog A; Regulatory particle triple-A ATPase subunit 4a	PS10A_ARATH	Q9SEI3	Q570H6	RPT4A	na	Arabidopsis thaliana (Mouse-ear cress)	3702
High	Master Protein	GLYMA_09G098900	K03098 - apolipoprotein D and lipocalin family protein (APOD) (1 of 4)	0	66.084	42	7	17	2	184	21.4	7.24	53.94	7	1	1.333	0.892765	23.27	118.7	81.3	32.18	91.72	High	High	High	High	Not Found	Not Found	1		3	1	Only Control	1	GLYMA_09G098900	GLYMA_09G098900	sp|Q9FGT8|TIL_ARATH	Temperature-induced lipocalin-1 GN=TIL	ident:131/184 pos:157/184 query:184 hit:186 align:182 bit:285.0	OK	Temperature-induced lipocalin-1 (AtTIL1)	na	TIL_ARATH	Q9FGT8	Q8LE12	TIL	na	Arabidopsis thaliana (Mouse-ear cress)	3702
High	Master Protein	GLYMA_15G205900	K03098 - apolipoprotein D and lipocalin family protein (APOD) (1 of 4)	0	56.816	39	7	13	3	184	21.2	8.07	45.14	7	3	0.978	0.97259	23.49	151.9	48.1	66.38	92.66	High	High	Not Found	High	Not Found	Not Found	1		2	1	Only Control	1	GLYMA_15G205900	GLYMA_15G205900	sp|Q9FGT8|TIL_ARATH	Temperature-induced lipocalin-1 GN=TIL	ident:130/184 pos:156/184 query:184 hit:186 align:181 bit:280.0	OK	Temperature-induced lipocalin-1 (AtTIL1)	na	TIL_ARATH	Q9FGT8	Q8LE12	TIL	na	Arabidopsis thaliana (Mouse-ear cress)	3702
High	Master Protein	GLYMA_17G075800	K03098 - apolipoprotein D and lipocalin family protein (APOD) (1 of 4)	0	4.147	10	2	4	1	184	21.2	6.06	7.09	2	0	1.767	0.879779	135.25	66.8	133.2	30.26	109	High	Peak Found	Peak Found	Peak Found	Not Found	Peak Found	1		3	2	Present Both	1	GLYMA_17G075800	GLYMA_17G075800	sp|Q9FGT8|TIL_ARATH	Temperature-induced lipocalin-1 GN=TIL	ident:138/184 pos:159/184 query:184 hit:186 align:182 bit:296.6	OK	Temperature-induced lipocalin-1 (AtTIL1)	na	TIL_ARATH	Q9FGT8	Q8LE12	TIL	na	Arabidopsis thaliana (Mouse-ear cress)	3702
Medium	Master Protein	GLYMA_10G162200	K03116 - sec-independent protein translocase protein TatA (tatA) (1 of 4)	0.017	1.393	5	1	1	1	136	14.4	9.31	0	1	0	0.559	0.618051	15.37	118.7	81.3	29.54	54.23	High	Peak Found	Peak Found	Peak Found	Peak Found	Not Found	1		3	2	Present Both	1	GLYMA_10G162200	GLYMA_10G162200	sp|Q9LKU2|TATA_ARATH	Sec-independent protein translocase protein TATA, chloroplastic GN=TATA	ident:61/136 pos:79/136 query:136 hit:147 align:95 bit:119.8	Poor_match	Sec-independent protein translocase protein TATA, chloroplastic	Protein THYLAKOID ASSEMBLY 4; Protein TWIN-ARGININE TRANSLOCATION A	TATA_ARATH	Q9LKU2	na	TATA	THA4	Arabidopsis thaliana (Mouse-ear cress)	3702
High	Master Protein	GLYMA_08G084800	K03189 - urease accessory protein (ureG) (1 of 1)	0	30.57	12	3	4	3	285	31.4	6.48	15	3	0	1.214	0.972386	22.77	93.2	106.8	8.7	0.8	High	High	Not Found	High	Not Found	Peak Found	1		2	2	Present Both	1	GLYMA_08G084800	GLYMA_08G084800	sp|O64700|UREG_ARATH	Urease accessory protein G GN=UREG	ident:224/285 pos:238/285 query:285 hit:275 align:254 bit:459.9	OK	Urease accessory protein G (AtUREG)	na	UREG_ARATH	O64700	Q9SYT8	UREG	na	Arabidopsis thaliana (Mouse-ear cress)	3702
High	Master Protein	GLYMA_05G089000	K03231 - elongation factor 1-alpha (EEF1A) (1 of 8)	0	279.225	29	16	156	4	447	49.3	9.06	520.24	16	0	0.913	0.952223	68.89	109.1	90.9	5.6	93.77	High	High	High	High	High	High	1		3	3	Present Both	1	GLYMA_05G089000	GLYMA_05G089000	sp|Q8GTY0|EF1A4_ARATH	Elongation factor 1-alpha 4 GN=A4	ident:425/447 pos:440/447 query:447 hit:449 align:446 bit:886.7	OK	Elongation factor 1-alpha 4 (EF-1-alpha 4)	eEF-1A4	EF1A4_ARATH	Q8GTY0	P13905; Q0WSD5; Q39093; Q9C5L4	A4	na	Arabidopsis thaliana (Mouse-ear cress)	3702
High	Master Protein	GLYMA_19G052400	K03231 - elongation factor 1-alpha (EEF1A) (1 of 8)	0	259.879	34	18	143	1	447	49.2	9.07	474.4	18	21	0.722	0.817898	48.62	117.7	82.3	21.86	105.3	High	High	High	Peak Found	Not Found	High	1		3	2	Present Both	1	GLYMA_19G052400	GLYMA_19G052400	sp|Q8GTY0|EF1A4_ARATH	Elongation factor 1-alpha 4 GN=A4	ident:433/447 pos:440/447 query:447 hit:449 align:446 bit:897.9	OK	Elongation factor 1-alpha 4 (EF-1-alpha 4)	eEF-1A4	EF1A4_ARATH	Q8GTY0	P13905; Q0WSD5; Q39093; Q9C5L4	A4	na	Arabidopsis thaliana (Mouse-ear cress)	3702
High	Master Protein	GLYMA_05G114900	K03231 - elongation factor 1-alpha (EEF1A) (1 of 8)	0	249.635	31	17	125	1	447	49.2	9.07	421.09	17	0	1.174	0.952604	88.97	97.7	102.3	11.42	81.81	High	High	High	High	High	High	1		3	3	Present Both	1	GLYMA_05G114900	GLYMA_05G114900	sp|Q8GTY0|EF1A4_ARATH	Elongation factor 1-alpha 4 GN=A4	ident:433/447 pos:440/447 query:447 hit:449 align:446 bit:899.0	OK	Elongation factor 1-alpha 4 (EF-1-alpha 4)	eEF-1A4	EF1A4_ARATH	Q8GTY0	P13905; Q0WSD5; Q39093; Q9C5L4	A4	na	Arabidopsis thaliana (Mouse-ear cress)	3702
High	Master Protein	GLYMA_19G078900	K03231 - elongation factor 1-alpha (EEF1A) (1 of 8)	0	146.943	47	7	95	1	154	16.9	9.23	305.26	7	0	3.546	0.13655	120.03	48.9	151.1	32.38	106.3	High	High	High	Not Found	High	High	1		3	2	Present Both	1	GLYMA_19G078900	GLYMA_19G078900	sp|Q8GTY0|EF1A4_ARATH	Elongation factor 1-alpha 4 GN=A4	ident:141/154 pos:148/154 query:154 hit:449 align:182 bit:271.6	Partial_match_hit	Elongation factor 1-alpha 4 (EF-1-alpha 4)	eEF-1A4	EF1A4_ARATH	Q8GTY0	P13905; Q0WSD5; Q39093; Q9C5L4	A4	na	Arabidopsis thaliana (Mouse-ear cress)	3702
High	Master Protein	GLYMA_04G195100	K03232 - elongation factor 1-beta (EEF1B) (1 of 5)	0	55.956	38	9	25	7	230	25	4.56	61.74	9	1	1.454	0.833854	67.15	79.1	120.9	16.22	35.63	High	High	High	High	High	High	1		3	3	Present Both	1	GLYMA_04G195100	GLYMA_04G195100	sp|Q9SI20|EF1D2_ARATH	Elongation factor 1-delta 2 GN=EDL1	ident:183/230 pos:203/230 query:230 hit:231 align:226 bit:325.1	OK	Elongation factor 1-delta 2 (EF-1-delta 2)	Elongation factor 1B-beta 2; eEF-1B beta 2	EF1D2_ARATH	Q9SI20	Q7GA96; Q8LB45	OrderedLocusNames=At2g18110	na	Arabidopsis thaliana (Mouse-ear cress)	3702
High	Master Protein	GLYMA_14G039100	K03232 - elongation factor 1-beta (EEF1B) (1 of 5)	0	53.85	44	7	15	5	223	24.2	4.68	37.76	7	0	3.193	0.198367	46.63	104.5	95.5	1.46	118.84	High	High	Not Found	High	Peak Found	High	1		2	3	Present Both	1	GLYMA_14G039100	GLYMA_14G039100	sp|Q84WM9|EF1B1_ARATH	Elongation factor 1-beta 1 GN=A3	ident:170/223 pos:191/223 query:223 hit:228 align:228 bit:310.5	OK	Elongation factor 1-beta 1 (EF-1-beta 1)	Elongation factor 1-beta' 1 (EF-1-beta' 1); Elongation factor 1B-alpha 1; eEF-1B alpha 1	EF1B1_ARATH	Q84WM9	Q9SCX2; Q9SCX4	OrderedLocusNames=At5g12110	na	Arabidopsis thaliana (Mouse-ear cress)	3702
High	Master Protein	GLYMA_13G073200	K03232 - elongation factor 1-beta (EEF1B) (1 of 5)	0	32.251	38	6	12	4	224	24.2	4.65	25.5	6	0	0.601	0.68405	23.7	101.1	98.9	9.97	56.93	High	High	Not Found	Peak Found	High	High	1		2	3	Present Both	1	GLYMA_13G073200	GLYMA_13G073200	sp|Q84WM9|EF1B1_ARATH	Elongation factor 1-beta 1 GN=A3	ident:164/224 pos:187/224 query:224 hit:228 align:228 bit:304.3	OK	Elongation factor 1-beta 1 (EF-1-beta 1)	Elongation factor 1-beta' 1 (EF-1-beta' 1); Elongation factor 1B-alpha 1; eEF-1B alpha 1	EF1B1_ARATH	Q84WM9	Q9SCX2; Q9SCX4	OrderedLocusNames=At5g12110	na	Arabidopsis thaliana (Mouse-ear cress)	3702
High	Master Protein	GLYMA_08G170000	K03234 - elongation factor 2 (EEF2) (1 of 3)	0	115.347	19	11	28	11	843	94	6.11	111.26	11	0	1.837	0.666016	117.99	89.4	110.6	15.68	128.65	High	High	High	High	High	High	1		3	3	Present Both	1	GLYMA_08G170000	GLYMA_08G170000	sp|Q9SGT4|EF2_ARATH	Elongation factor 2 GN=LOS1	ident:786/843 pos:817/843 query:843 hit:843 align:843 bit:1658.7	OK	Elongation factor 2 (EF-2)	Protein LOW EXPRESSION OF OSMOTICALLY RESPONSIVE GENES 1	EF2_ARATH	Q9ASR1	C0Z355; Q56WX9; Q56WY3; Q570K2; Q84R07; Q8H145; Q94CA4; Q9SGT4	LOS1	na	Arabidopsis thaliana (Mouse-ear cress)	3702
High	Master Protein	GLYMA_12G002900	K03246 - translation initiation factor 3 subunit I (EIF3I) (1 of 3)	0	164.384	58	12	30	3	326	35.9	6.76	101.73	12	2	1.219	0.972386	134.42	39.5	160.5	10.02	136.95	High	Not Found	Not Found	Not Found	Not Found	High	1		1	1	Missing Both	1	GLYMA_12G002900	GLYMA_12G002900	sp|Q38884|EIF3I_ARATH	Eukaryotic translation initiation factor 3 subunit I GN=TIF3I1	ident:266/326 pos:300/326 query:326 hit:328 align:328 bit:548.1	OK	Eukaryotic translation initiation factor 3 subunit I (eIF3i)	Eukaryotic translation initiation factor 3 subunit 2; TGF-beta receptor-interacting protein 1 (TRIP-1); eIF-3-beta; eIF3 p36	EIF3I_ARATH	Q38884	O82342; Q94K09; Q9C5Z0	TIF3I1	na	Arabidopsis thaliana (Mouse-ear cress)	3702
High	Master Protein	GLYMA_18G133400	K03248 - translation initiation factor 3 subunit G (EIF3G) (1 of 2)	0	83.003	51	13	34	13	290	32.2	8.21	79.56	13	0	1.486	0.819947	101.71	79.8	120.2	36.37	96.28	High	High	High	High	High	High	1		3	3	Present Both	1	GLYMA_18G133400	GLYMA_18G133400	sp|Q9SYG4|UBP1A_ARATH	Oligouridylate-binding protein 1A GN=UBP1A	ident:38/290 pos:52/290 query:290 hit:426 align:89 bit:67.4	Partial_match_both	Oligouridylate-binding protein 1A (AtUBP1a)	Polyuridylate-binding protein UBP1A (Poly(U)-binding protein UBP1A)	UBP1A_ARATH	Q9SYG4	na	UBP1A	na	Arabidopsis thaliana (Mouse-ear cress)	3702
High	Master Protein	GLYMA_03G206400	K03252 - translation initiation factor 3 subunit C (EIF3C) (1 of 3)	0	10.633	4	2	6	2	926	104.6	5.63	11.12	2	0	2.307	0.534268	80.95	65.8	134.2	32.53	80.95	High	High	Not Found	Not Found	High	High	1		2	2	Present Both	1	GLYMA_03G206400	GLYMA_03G206400	sp|O49160|EIF3C_ARATH	Eukaryotic translation initiation factor 3 subunit C GN=TIF3C1	ident:641/926 pos:743/926 query:926 hit:900 align:936 bit:1180.2	OK	Eukaryotic translation initiation factor 3 subunit C (eIF3c)	Eukaryotic translation initiation factor 3 subunit 8; eIF3 p110; p105	EIF3C_ARATH	O49160	Q9LYM6	TIF3C1	na	Arabidopsis thaliana (Mouse-ear cress)	3702
High	Master Protein	GLYMA_13G106200	K03257 - translation initiation factor 4A (EIF4A) (1 of 11)	0	44.381	23	7	16	3	413	46.7	5.68	41.18	7	0	1.263	0.918392	121.17	110.1	89.9	42.23	113.63	High	Peak Found	Peak Found	Peak Found	Peak Found	High	1		3	3	Present Both	1	GLYMA_13G106200	GLYMA_13G106200	sp|P41376|IF4A1_ARATH	Eukaryotic initiation factor 4A-1 GN=TIF4A-1	ident:381/413 pos:403/413 query:413 hit:412 align:414 bit:787.3	OK	Eukaryotic initiation factor 4A-1 (eIF-4A-1)	ATP-dependent RNA helicase eIF4A-1; DEAD-box ATP-dependent RNA helicase 4	IF4A1_ARATH	P41376	Q0WWD9; Q546P0; Q8LBZ6; Q8RXF3; Q94CM1	TIF4A-1	RH4	Arabidopsis thaliana (Mouse-ear cress)	3702
High	Master Protein	GLYMA_02G198400	K03386 - peroxiredoxin (alkyl hydroperoxide reductase subunit C) [EC:1.11.1.15] (E1.11.1.15, PRDX, ahpC) (1 of 2)	0	22.651	14	2	6	2	260	28.5	6.4	26.48	2	0	0.654	0.751709	34.63	102.6	97.4	59.94	80.65	High	Peak Found	High	Peak Found	High	Not Found	1		3	2	Present Both	1	GLYMA_02G198400	GLYMA_02G198400	sp|Q9C5R8|BAS1B_ARATH	2-Cys peroxiredoxin BAS1-like, chloroplastic GN=BAT1	ident:187/260 pos:201/260 query:260 hit:273 align:213 bit:399.8	OK	2-Cys peroxiredoxin BAS1-like, chloroplastic (2-Cys Prx B; 2-Cys peroxiredoxin B)	Thiol-specific antioxidant protein B	BAS1B_ARATH	Q9C5R8	Q9FED5; Q9FNH9	OrderedLocusNames=At5g06290	na	Arabidopsis thaliana (Mouse-ear cress)	3702
High	Master Protein	GLYMA_13G232500	K03405 - magnesium chelatase subunit I (chlI, bchI) (1 of 4)	0	10.161	9	3	8	3	421	45.8	5.69	13.22	3	0	0.605	0.73785	15.74	130.5	69.5	15.03	44.23	High	High	High	High	Peak Found	Not Found	1		3	2	Present Both	1	GLYMA_13G232500	GLYMA_13G232500	sp|P16127|CHLI1_ARATH	Magnesium-chelatase subunit ChlI-1, chloroplastic GN=CHLI1	ident:343/421 pos:375/421 query:421 hit:424 align:424 bit:654.8	OK	Magnesium-chelatase subunit ChlI-1, chloroplastic (Mg-chelatase subunit I-1)	Mg-protoporphyrin IX chelatase subunit ChlI-1; Protein CHLORINA 42	CHLI1_ARATH	P16127	Q0WUK7	CHLI1	CH42; CS	Arabidopsis thaliana (Mouse-ear cress)	3702
High	Master Protein	GLYMA_05G200500	K03428 - magnesium-protoporphyrin O-methyltransferase (E2.1.1.11, chlM, bchM) (1 of 2)	0	27.644	12	5	13	5	324	35.1	7.49	24.6	5	0	0.569	0.639992	29.42	108.1	91.9	124.79	48.72	High	High	High	High	High	Not Found	1		3	2	Present Both	1	GLYMA_05G200500.3.p	GLYMA_05G200500.3.p	sp|Q9SW18|CHLM_ARATH	Magnesium protoporphyrin IX methyltransferase, chloroplastic GN=CHLM	ident:228/324 pos:255/324 query:324 hit:312 align:300 bit:461.5	OK	Magnesium protoporphyrin IX methyltransferase, chloroplastic	na	CHLM_ARATH	Q9SW18	B3H4K6; B9DF98	CHLM	na	Arabidopsis thaliana (Mouse-ear cress)	3702
High	Master Protein	GLYMA_08G173700	K03541 - photosystem II 10kDa protein (psbR) (1 of 2)	0	257.218	35	9	98	2	139	14.3	9.7	367.43	9	9	0.977	0.972386	39	104.6	95.4	16.27	72.55	High	High	High	High	High	Peak Found	1		3	3	Present Both	1	GLYMA_08G173700	GLYMA_08G173700	sp|P27202|PSBR_ARATH	Photosystem II 10 kDa polypeptide, chloroplastic GN=PSBR	ident:108/139 pos:123/139 query:139 hit:140 align:140 bit:214.2	OK	Photosystem II 10 kDa polypeptide, chloroplastic	na	PSBR_ARATH	P27202	na	PSBR	ART1	Arabidopsis thaliana (Mouse-ear cress)	3702
High	Master Protein	GLYMA_15G253700	K03541 - photosystem II 10kDa protein (psbR) (1 of 2)	0	209.443	36	9	87	2	138	14.3	9.7	310.86	9	0	1.052	0.992627	34.63	118.9	81.1	27.66	61.26	High	High	High	High	High	Peak Found	1		3	3	Present Both	1	GLYMA_15G253700	GLYMA_15G253700	sp|P27202|PSBR_ARATH	Photosystem II 10 kDa polypeptide, chloroplastic GN=PSBR	ident:107/138 pos:121/138 query:138 hit:140 align:140 bit:209.1	OK	Photosystem II 10 kDa polypeptide, chloroplastic	na	PSBR_ARATH	P27202	na	PSBR	ART1	Arabidopsis thaliana (Mouse-ear cress)	3702
High	Master Protein	GLYMA_04G249700	K03542 - photosystem II 22kDa protein (psbS) (1 of 3)	0	57.474	16	4	19	4	273	29	6.86	67.22	4	0	0.73	0.825285	9.33	117.7	82.3	7.09	6.05	High	High	High	High	High	Not Found	1		3	2	Present Both	1	GLYMA_04G249700	GLYMA_04G249700	sp|Q9XF91|PSBS_ARATH	Photosystem II 22 kDa protein, chloroplastic GN=PSBS	ident:196/273 pos:214/273 query:273 hit:265 align:275 bit:310.1	OK	Photosystem II 22 kDa protein, chloroplastic	CP22; Protein NONPHOTOCHEMICAL QUENCHING 4; Protein PHOTOSYSTEM II SUBUNIT S	PSBS_ARATH	Q9XF91	Q56XH2; Q94EI1; Q9ST34	PSBS	na	Arabidopsis thaliana (Mouse-ear cress)	3702
High	Master Protein	GLYMA_13G113200	K03564 - peroxiredoxin Q/BCP (BCP, PRXQ, DOT5) (1 of 2)	0	184.197	37	11	44	1	214	23.3	9.47	162.61	11	0	0.775	0.859463	18.02	112.7	87.3	11.86	26.82	High	High	High	High	High	Peak Found	1		3	3	Present Both	1	GLYMA_13G113200	GLYMA_13G113200	sp|Q9LU86|PRXQ_ARATH	Peroxiredoxin Q, chloroplastic GN=PRXQ	ident:155/214 pos:173/214 query:214 hit:216 align:214 bit:294.7	OK	Peroxiredoxin Q, chloroplastic	Thioredoxin peroxidase	PRXQ_ARATH	Q9LU86	na	PRXQ	na	Arabidopsis thaliana (Mouse-ear cress)	3702
High	Master Protein	GLYMA_17G046500	K03564 - peroxiredoxin Q/BCP (BCP, PRXQ, DOT5) (1 of 2)	0	168.964	38	12	44	2	213	23.3	9.41	172.75	12	9	0.726	0.820718	18.31	124	76	5.69	34.52	High	High	High	High	High	Not Found	1		3	2	Present Both	1	GLYMA_17G046500	GLYMA_17G046500	sp|Q9LU86|PRXQ_ARATH	Peroxiredoxin Q, chloroplastic GN=PRXQ	ident:154/213 pos:173/213 query:213 hit:216 align:213 bit:301.2	OK	Peroxiredoxin Q, chloroplastic	Thioredoxin peroxidase	PRXQ_ARATH	Q9LU86	na	PRXQ	na	Arabidopsis thaliana (Mouse-ear cress)	3702
High	Master Protein	GLYMA_06G137800	K03626 - nascent polypeptide-associated complex subunit alpha (EGD2, NACA) (1 of 8)	0	39.738	26	5	14	5	225	24.4	4.54	41.05	5	0	0.525	0.577404	13.71	156.9	43.1	12.08	51.49	High	High	Not Found	High	Not Found	High	1		2	2	Present Both	1	GLYMA_06G137800	GLYMA_06G137800	sp|Q94JX9|NACA2_ARATH	Nascent polypeptide-associated complex subunit alpha-like protein 2 GN=NAC096	ident:151/225 pos:179/225 query:225 hit:217 align:225 bit:248.4	OK	Nascent polypeptide-associated complex subunit alpha-like protein 2 (NAC-alpha-like protein 2)	Alpha-NAC-like protein 2	NACA2_ARATH	Q94JX9	Q9S7G0	OrderedLocusNames=At3g49470	na	Arabidopsis thaliana (Mouse-ear cress)	3702
High	Master Protein	GLYMA_19G125500	K03626 - nascent polypeptide-associated complex subunit alpha (EGD2, NACA) (1 of 8)	0	27.752	14	3	7	2	205	22.4	4.63	26.27	3	1	0.485	0.513972	11.67	131.6	68.4	74.85		High	High	Peak Found	High	Not Found	Not Found	1		3	1	Only Control	1	GLYMA_19G125500	GLYMA_19G125500	sp|Q9LHG9|NACA1_ARATH	Nascent polypeptide-associated complex subunit alpha-like protein 1 GN=NAC030	ident:156/205 pos:175/205 query:205 hit:203 align:202 bit:240.7	OK	Nascent polypeptide-associated complex subunit alpha-like protein 1 (NAC-alpha-like protein 1)	Alpha-NAC-like protein 1	NACA1_ARATH	Q9LHG9	na	OrderedLocusNames=At3g12390	na	Arabidopsis thaliana (Mouse-ear cress)	3702
High	Master Protein	GLYMA_06G276300	K03627 - putative transcription factor (MBF1) (1 of 3)	0	35.185	27	3	10	3	142	15.5	9.83	29.72	3	0	0.553	0.612053	3.66	129.4	70.6	18.84	9.76	High	High	Peak Found	High	High	Not Found	1		3	2	Present Both	1	GLYMA_06G276300	GLYMA_06G276300	sp|Q9SJI8|MBF1A_ARATH	Multiprotein-bridging factor 1a GN=MBF1A	ident:119/142 pos:133/142 query:142 hit:142 align:142 bit:249.2	OK	Multiprotein-bridging factor 1a	na	MBF1A_ARATH	Q9SJI8	na	MBF1A	na	Arabidopsis thaliana (Mouse-ear cress)	3702
High	Master Protein	GLYMA_06G165200	K03696 - ATP-dependent Clp protease ATP-binding subunit ClpC (clpC) (1 of 6)	0	404.038	45	42	152	5	922	102.4	6.46	522.24	42	36	0.698	0.799527	39.48	124.1	75.9	12.11	37.34	High	High	High	High	High	High	1		3	3	Present Both	1	GLYMA_06G165200	GLYMA_06G165200	sp|Q9FI56|CLPC1_ARATH	Chaperone protein ClpC1, chloroplastic GN=CLPC1	ident:822/922 pos:866/922 query:922 hit:929 align:925 bit:1598.2	OK	Chaperone protein ClpC1, chloroplastic	ATP-dependent Clp protease ATP-binding subunit ClpC homolog 1; Casein lytic proteinase C1; Protein DE-REGULATED CAO ACCUMULATION 1; Protein IRON-RESCUED MUTANT 1	CLPC1_ARATH	Q9FI56	O48931	CLPC1	na	Arabidopsis thaliana (Mouse-ear cress)	3702
High	Master Protein	GLYMA_04G017500	K03781 - catalase (katE, CAT, catB, srpA) (1 of 4)	0	59.386	17	6	20	2	492	56.7	7.28	61.5	6	4	0.747	0.840112	42.53	139.7	60.3	31.96	94.41	High	High	Not Found	Peak Found	Not Found	Peak Found	1		2	2	Present Both	1	GLYMA_04G017500	GLYMA_04G017500	sp|P25819|CATA2_ARATH	Catalase-2 GN=CAT2	ident:426/492 pos:471/492 query:492 hit:492 align:492 bit:924.9	OK	Catalase-2	na	CATA2_ARATH	P25819	O49615	CAT2	CAT	Arabidopsis thaliana (Mouse-ear cress)	3702
High	Master Protein	GLYMA_06G017900	K03781 - catalase (katE, CAT, catB, srpA) (1 of 4)	0	57.23	15	5	20	1	492	56.7	7.25	69.51	5	0	0.01	6.62973e-17		200		16.08		High	High	Not Found	High	Not Found	Not Found	1		2	1	Only Control	1	GLYMA_06G017900	GLYMA_06G017900	sp|P25819|CATA2_ARATH	Catalase-2 GN=CAT2	ident:428/492 pos:471/492 query:492 hit:492 align:492 bit:926.0	OK	Catalase-2	na	CATA2_ARATH	P25819	O49615	CAT2	CAT	Arabidopsis thaliana (Mouse-ear cress)	3702
High	Master Protein	GLYMA_11G214800	K03934 - NADH dehydrogenase (ubiquinone) Fe-S protein 1 (NDUFS1) (1 of 2)	0	382.273	53	28	92	9	747	81.3	6.7	311.21	28	21	1.682	0.734478	97.71	79.4	120.6	54.49	102.53	High	High	High	High	High	High	1		3	3	Present Both	1	GLYMA_11G214800	GLYMA_11G214800	sp|Q9FGI6|NDUS1_ARATH	NADH dehydrogenase [ubiquinone] iron-sulfur protein 1, mitochondrial GN=EMB1467	ident:604/747 pos:671/747 query:747 hit:748 align:747 bit:1248.8	OK	NADH dehydrogenase [ubiquinone] iron-sulfur protein 1, mitochondrial	Protein EMBRYO DEFECTIVE 1467	NDUS1_ARATH	Q9FGI6	Q940B1	EMB1467	na	Arabidopsis thaliana (Mouse-ear cress)	3702
High	Master Protein	GLYMA_18G041700	K03934 - NADH dehydrogenase (ubiquinone) Fe-S protein 1 (NDUFS1) (1 of 2)	0	312.061	45	24	72	5	746	81.2	6.62	227.93	24	0	1.577	0.792914	79.7	69.4	130.6	28.49	78.18	High	High	High	High	High	High	1		3	3	Present Both	1	GLYMA_18G041700	GLYMA_18G041700	sp|Q9FGI6|NDUS1_ARATH	NADH dehydrogenase [ubiquinone] iron-sulfur protein 1, mitochondrial GN=EMB1467	ident:601/746 pos:666/746 query:746 hit:748 align:746 bit:1237.6	OK	NADH dehydrogenase [ubiquinone] iron-sulfur protein 1, mitochondrial	Protein EMBRYO DEFECTIVE 1467	NDUS1_ARATH	Q9FGI6	Q940B1	EMB1467	na	Arabidopsis thaliana (Mouse-ear cress)	3702
High	Master Protein	GLYMA_17G160400	K03937 - NADH dehydrogenase (ubiquinone) Fe-S protein 4 (NDUFS4) (1 of 2)	0	363.293	74	21	170	8	146	16.3	9.85	606.77	21	0	1.151	0.957402	60.06	100.2	99.8	6.02	40.18	High	High	High	High	High	High	1		3	3	Present Both	1	GLYMA_17G160400	GLYMA_17G160400	sp|Q9FJW4|NDUS4_ARATH	NADH dehydrogenase [ubiquinone] iron-sulfur protein 4, mitochondrial GN=FRO1	ident:108/146 pos:128/146 query:146 hit:154 align:149 bit:224.6	OK	NADH dehydrogenase [ubiquinone] iron-sulfur protein 4, mitochondrial	Protein FROSTBITE1	NDUS4_ARATH	Q9FJW4	Q8LC28	FRO1	na	Arabidopsis thaliana (Mouse-ear cress)	3702
High	Master Protein	GLYMA_05G106100	K03937 - NADH dehydrogenase (ubiquinone) Fe-S protein 4 (NDUFS4) (1 of 2)	0	361.481	74	23	189	10	146	16.3	9.8	627.31	23	13	1.14	0.960306	61	98.9	101.1	17.62	27.06	High	High	High	High	High	High	1		3	3	Present Both	1	GLYMA_05G106100	GLYMA_05G106100	sp|Q9FJW4|NDUS4_ARATH	NADH dehydrogenase [ubiquinone] iron-sulfur protein 4, mitochondrial GN=FRO1	ident:109/146 pos:128/146 query:146 hit:154 align:149 bit:224.9	OK	NADH dehydrogenase [ubiquinone] iron-sulfur protein 4, mitochondrial	Protein FROSTBITE1	NDUS4_ARATH	Q9FJW4	Q8LC28	FRO1	na	Arabidopsis thaliana (Mouse-ear cress)	3702
High	Master Protein	GLYMA_11G091800	K03939 - NADH dehydrogenase (ubiquinone) Fe-S protein 6 (NDUFS6) (1 of 2)	0	156.445	24	4	61	4	105	11.7	7.43	256.76	4	0	1.937	0.616255	83.97	70.3	129.7	43.43	57.23	High	High	High	High	High	High	1		3	3	Present Both	1	GLYMA_11G091800	GLYMA_11G091800	sp|Q9M9M6|NDUS6_ARATH	NADH dehydrogenase [ubiquinone] iron-sulfur protein 6, mitochondrial GN=NDL2	ident:77/105 pos:90/105 query:105 hit:110 align:113 bit:157.9	OK	NADH dehydrogenase [ubiquinone] iron-sulfur protein 6, mitochondrial	na	NDUS6_ARATH	Q9M9M6	Q41901	OrderedLocusNames=At3g03070	na	Arabidopsis thaliana (Mouse-ear cress)	3702
High	Master Protein	GLYMA_04G050600	K03940 - NADH dehydrogenase (ubiquinone) Fe-S protein 7 (NDUFS7) (1 of 3)	0	58.575	17	4	9	4	213	23.5	9.44	27.85	4	0	1.941	0.639992	129.22	75.2	124.8	15.09	100.81	High	High	Peak Found	High	High	High	1		3	3	Present Both	1	GLYMA_04G050600	GLYMA_04G050600	sp|Q42577|NDUS7_ARATH	NADH dehydrogenase [ubiquinone] iron-sulfur protein 7, mitochondrial GN=NEAP3	ident:179/213 pos:194/213 query:213 hit:218 align:221 bit:350.5	OK	NADH dehydrogenase [ubiquinone] iron-sulfur protein 7, mitochondrial	na	NDUS7_ARATH	Q42577	na	OrderedLocusNames=At5g11770	na	Arabidopsis thaliana (Mouse-ear cress)	3702
High	Master Protein	GLYMA_15G071900	K03941 - NADH dehydrogenase (ubiquinone) Fe-S protein 8 (NDUFS8) (1 of 3)	0	36.238	25	5	10	5	222	25.6	5.55	27.91	5	0	1.902	0.671207	39.56	69.6	130.4	30.91	50.14	High	High	Peak Found	High	High	High	1		3	3	Present Both	1	GLYMA_15G071900	GLYMA_15G071900	sp|Q9FX83|NDS8B_ARATH	NADH dehydrogenase [ubiquinone] iron-sulfur protein 8-B, mitochondrial GN=ndhN	ident:194/222 pos:205/222 query:222 hit:222 align:222 bit:402.9	OK	NADH dehydrogenase [ubiquinone] iron-sulfur protein 8-B, mitochondrial	na	NDS8B_ARATH	Q9FX83	na	OrderedLocusNames=At1g16700	na	Arabidopsis thaliana (Mouse-ear cress)	3702
High	Master Protein	GLYMA_10G005500	K03942 - NADH dehydrogenase (ubiquinone) flavoprotein 1 (NDUFV1) (1 of 2)	0	49.027	11	5	23	1	482	52.8	7.8	55.18	5	0	0.41	0.522864	3.91	141.9	58.1	21.98		High	High	Not Found	Peak Found	Not Found	Not Found	1		2	1	Only Control	1	GLYMA_10G005500	GLYMA_10G005500	sp|Q9FNN5|NDUV1_ARATH	NADH dehydrogenase [ubiquinone] flavoprotein 1, mitochondrial GN=NPR3	ident:439/482 pos:463/482 query:482 hit:486 align:481 bit:859.8	OK	NADH dehydrogenase [ubiquinone] flavoprotein 1, mitochondrial	na	NDUV1_ARATH	Q9FNN5	Q8LAL7	OrderedLocusNames=At5g08530	na	Arabidopsis thaliana (Mouse-ear cress)	3702
High	Master Protein	GLYMA_04G179100	K03946 - NADH dehydrogenase (ubiquinone) 1 alpha subcomplex subunit 2 (NDUFA2) (1 of 2)	0	108.04	46	9	54	3	98	11.1	9.36	186.79	9	5	1.567	0.795145	47.87	77.2	122.8	9.86	41.9	High	High	High	High	High	High	1		3	3	Present Both	1	GLYMA_04G179100	GLYMA_04G179100	sp|Q9FIJ2|NDUA2_ARATH	NADH dehydrogenase [ubiquinone] 1 alpha subcomplex subunit 2 GN=NDB1	ident:68/98 pos:87/98 query:98 hit:97 align:95 bit:155.2	OK	NADH dehydrogenase [ubiquinone] 1 alpha subcomplex subunit 2	na	NDUA2_ARATH	Q9FIJ2	na	OrderedLocusNames=At5g47890	na	Arabidopsis thaliana (Mouse-ear cress)	3702
High	Master Protein	GLYMA_09G129000	K03949 - NADH dehydrogenase (ubiquinone) 1 alpha subcomplex subunit 5 (NDUFA5) (1 of 1)	0	93.914	47	8	36	8	166	18.6	5.01	127.72	8	0	1.709	0.722034	43.64	77.4	122.6	3.9	97.84	High	High	High	High	High	High	1		3	3	Present Both	1	GLYMA_09G129000	GLYMA_09G129000	sp|Q9FLX7|NDUA5_ARATH	Probable NADH dehydrogenase [ubiquinone] 1 alpha subcomplex subunit 5, mitochondrial GN=NSL1	ident:130/166 pos:142/166 query:166 hit:169 align:164 bit:266.5	OK	Probable NADH dehydrogenase [ubiquinone] 1 alpha subcomplex subunit 5, mitochondrial	na	NDUA5_ARATH	Q9FLX7	na	OrderedLocusNames=At5g52840	na	Arabidopsis thaliana (Mouse-ear cress)	3702
High	Master Protein	GLYMA_13G193600	K03950 - NADH dehydrogenase (ubiquinone) 1 alpha subcomplex subunit 6 (NDUFA6) (1 of 2)	0	236.694	92	16	111	5	131	15.1	8.7	357.7	16	17	1.075	0.986342	61.43	94.5	105.5	11.92	28.62	High	High	High	High	High	High	1		3	3	Present Both	1	GLYMA_13G193600	GLYMA_13G193600	sp|Q9LHI0|NDUA6_ARATH	NADH dehydrogenase [ubiquinone] 1 alpha subcomplex subunit 6 GN=NDC80	ident:84/131 pos:107/131 query:131 hit:133 align:128 bit:188.0	OK	NADH dehydrogenase [ubiquinone] 1 alpha subcomplex subunit 6	na	NDUA6_ARATH	Q9LHI0	na	OrderedLocusNames=At3g12260	na	Arabidopsis thaliana (Mouse-ear cress)	3702
High	Master Protein	GLYMA_15G231900	K03950 - NADH dehydrogenase (ubiquinone) 1 alpha subcomplex subunit 6 (NDUFA6) (1 of 2)	0	200.187	77	11	77	4	131	15.1	9.31	261.92	11	0	0.85	0.905426	23.82	103.5	96.5	44.17	13.09	High	High	High	High	High	High	1		3	3	Present Both	1	GLYMA_15G231900	GLYMA_15G231900	sp|Q9LHI0|NDUA6_ARATH	NADH dehydrogenase [ubiquinone] 1 alpha subcomplex subunit 6 GN=NDC80	ident:87/131 pos:109/131 query:131 hit:133 align:131 bit:193.4	OK	NADH dehydrogenase [ubiquinone] 1 alpha subcomplex subunit 6	na	NDUA6_ARATH	Q9LHI0	na	OrderedLocusNames=At3g12260	na	Arabidopsis thaliana (Mouse-ear cress)	3702
High	Master Protein	GLYMA_13G127400	K03953 - NADH dehydrogenase (ubiquinone) 1 alpha subcomplex subunit 9 (NDUFA9) (1 of 1)	0	133.751	47	16	41	16	396	43.8	9.2	112.07	16	0	1.401	0.854204	86.09	60.6	139.4	14.72	75.5	High	High	High	High	High	High	1		3	3	Present Both	1	GLYMA_13G127400	GLYMA_13G127400	sp|Q9SK66|NDUA9_ARATH	NADH dehydrogenase [ubiquinone] 1 alpha subcomplex subunit 9, mitochondrial GN=NCED9	ident:294/396 pos:352/396 query:396 hit:402 align:402 bit:599.0	OK	NADH dehydrogenase [ubiquinone] 1 alpha subcomplex subunit 9, mitochondrial	na	NDUA9_ARATH	Q9SK66	B9DHU2; Q93VY5	OrderedLocusNames=At2g20360	na	Arabidopsis thaliana (Mouse-ear cress)	3702
High	Master Protein	GLYMA_09G247100	K03955 - NADH dehydrogenase (ubiquinone) 1 alpha/beta subcomplex 1 (NDUFAB1) (1 of 5)	0	34.75	13	3	14	3	116	13	5.5	45.27	3	0	2.548	0.374011	80.23	45.5	154.5	40.34	65.64	High	High	High	High	High	Not Found	1		3	2	Present Both	1	GLYMA_09G247100	GLYMA_09G247100	sp|P53665|ACPM1_ARATH	Acyl carrier protein 1, mitochondrial GN=MTACP1	ident:86/116 pos:98/116 query:116 hit:122 align:123 bit:167.9	OK	Acyl carrier protein 1, mitochondrial	MtACP-1 (ACP); NADH-ubiquinone oxidoreductase 9.6 kDa subunit	ACPM1_ARATH	P53665	na	MTACP1	na	Arabidopsis thaliana (Mouse-ear cress)	3702
High	Master Protein	GLYMA_09G248500	K03955 - NADH dehydrogenase (ubiquinone) 1 alpha/beta subcomplex 1 (NDUFAB1) (1 of 5)	0	22.727	10	1	11	1	128	14.4	5.57	37.07	1	0	1.59	0.783294	50.2	77.2	122.8	16.14	76.06	High	High	High	High	High	High	1		3	3	Present Both	1	GLYMA_09G248500	GLYMA_09G248500	sp|O80800|ACPM2_ARATH	Acyl carrier protein 2, mitochondrial GN=MTACP2	ident:92/128 pos:103/128 query:128 hit:126 align:120 bit:182.2	OK	Acyl carrier protein 2, mitochondrial	MtACP-2 (ACP); NADH-ubiquinone oxidoreductase 9.6 kDa subunit	ACPM2_ARATH	O80800	Q8LEU1	MTACP2	na	Arabidopsis thaliana (Mouse-ear cress)	3702
High	Master Protein	GLYMA_20G108500	K03963 - NADH dehydrogenase (ubiquinone) 1 beta subcomplex subunit 7 (NDUFB7) (1 of 1)	0	222.467	60	11	171	11	98	11.6	8.18	496.98	11	0	1.111	0.972386	72.25	97.8	102.2	3.81	30.71	High	High	High	High	High	High	1	Acetyl [N-Term]	3	3	Present Both	1	GLYMA_20G108500	GLYMA_20G108500	sp|Q9SKC9|NDUB7_ARATH	NADH dehydrogenase [ubiquinone] 1 beta subcomplex subunit 7 GN=OFUT9	ident:75/98 pos:82/98 query:98 hit:103 align:105 bit:144.4	OK	NADH dehydrogenase [ubiquinone] 1 beta subcomplex subunit 7	na	NDUB7_ARATH	Q9SKC9	Q42155; Q42220; Q8GXZ6	OrderedLocusNames=At2g02050	na	Arabidopsis thaliana (Mouse-ear cress)	3702
High	Master Protein	GLYMA_04G008100	K03965 - NADH dehydrogenase (ubiquinone) 1 beta subcomplex subunit 9 (NDUFB9) (1 of 2)	0	308.689	80	17	127	6	115	13.5	7.58	467.93	17	11	1.108	0.972386	37.21	90.2	109.8	7.82	49.41	High	High	High	High	High	High	1		3	3	Present Both	1	GLYMA_04G008100	GLYMA_04G008100	sp|Q945M1|NDUB9_ARATH	NADH dehydrogenase [ubiquinone] 1 beta subcomplex subunit 9 GN=CIB22	ident:94/115 pos:99/115 query:115 hit:117 align:113 bit:196.1	OK	NADH dehydrogenase [ubiquinone] 1 beta subcomplex subunit 9	B22 subunit of eukaryotic mitochondrial complex I; Complex I-B22 (AtCIB22; CI-B22); NADH-ubiquinone oxidoreductase B22 subunit	NDUB9_ARATH	Q945M1	O65692; Q56Z32; Q8LDS9	CIB22	na	Arabidopsis thaliana (Mouse-ear cress)	3702
High	Master Protein	GLYMA_06G007900	K03965 - NADH dehydrogenase (ubiquinone) 1 beta subcomplex subunit 9 (NDUFB9) (1 of 2)	0	269.938	59	15	105	4	122	14.3	9.33	384.02	15	0	1.036	0.998965	61.33	95.7	104.3	54.8	55.57	High	High	Peak Found	High	High	High	1		3	3	Present Both	1	GLYMA_06G007900	GLYMA_06G007900	sp|Q945M1|NDUB9_ARATH	NADH dehydrogenase [ubiquinone] 1 beta subcomplex subunit 9 GN=CIB22	ident:84/122 pos:90/122 query:122 hit:117 align:108 bit:173.7	OK	NADH dehydrogenase [ubiquinone] 1 beta subcomplex subunit 9	B22 subunit of eukaryotic mitochondrial complex I; Complex I-B22 (AtCIB22; CI-B22); NADH-ubiquinone oxidoreductase B22 subunit	NDUB9_ARATH	Q945M1	O65692; Q56Z32; Q8LDS9	CIB22	na	Arabidopsis thaliana (Mouse-ear cress)	3702
High	Master Protein	GLYMA_12G049400	K03969 - phage shock protein A (pspA) (1 of 3)	0	433.747	61	26	125	26	323	35.5	9.33	568.1	26	0	0.719	0.816994	25.58	122.7	77.3	24.46	76.11	High	High	High	High	High	High	1		3	3	Present Both	1	GLYMA_12G049400	GLYMA_12G049400	sp|O80796|VIPP1_ARATH	Membrane-associated protein VIPP1, chloroplastic GN=VIPP1	ident:225/323 pos:276/323 query:323 hit:330 align:332 bit:427.2	OK	Membrane-associated protein VIPP1, chloroplastic	Protein VESICLE-INDUCING PROTEIN IN PLASTIDS 1	VIPP1_ARATH	O80796	na	VIPP1	na	Arabidopsis thaliana (Mouse-ear cress)	3702
High	Master Protein	GLYMA_03G242900	K04565 - superoxide dismutase, Cu-Zn family (SOD1) (1 of 6)	0	62.932	18	3	25	3	152	15.2	6.04	99.48	3	0	1.432	0.843781	51.9	71	129	24.61	28.79	High	High	High	High	High	High	1		3	3	Present Both	1	GLYMA_03G242900	GLYMA_03G242900	sp|P24704|SODC1_ARATH	Superoxide dismutase [Cu-Zn] 1 GN=CSD1	ident:126/152 pos:136/152 query:152 hit:152 align:152 bit:254.2	OK	Superoxide dismutase [Cu-Zn] 1	Copper/zinc superoxide dismutase 1	SODC1_ARATH	P24704	A3FMJ0; Q9FRQ6	CSD1	SODCC	Arabidopsis thaliana (Mouse-ear cress)	3702
High	Master Protein	GLYMA_19G240400	K04565 - superoxide dismutase, Cu-Zn family (SOD1) (1 of 6)	0	42.747	13	2	15	2	152	15.2	5.6	50.9	2	0	1.725	0.713668	66.56	68.3	131.7	30.95	38.9	High	High	High	High	High	High	1		3	3	Present Both	1	GLYMA_19G240400	GLYMA_19G240400	sp|P24704|SODC1_ARATH	Superoxide dismutase [Cu-Zn] 1 GN=CSD1	ident:126/152 pos:137/152 query:152 hit:152 align:152 bit:255.4	OK	Superoxide dismutase [Cu-Zn] 1	Copper/zinc superoxide dismutase 1	SODC1_ARATH	P24704	A3FMJ0; Q9FRQ6	CSD1	SODCC	Arabidopsis thaliana (Mouse-ear cress)	3702
High	Master Protein	GLYMA_06G086200	K04794 - peptidyl-tRNA hydrolase, PTH2 family [EC:3.1.1.29] (PTH2) (1 of 4)	0	8.581	7	1	2	1	196	21.4	9.57	7.76	1	0	0.318	0.303226	1.63	151.7	48.3	15.24		High	High	Not Found	Peak Found	Not Found	Not Found	1		2	1	Only Control	1	GLYMA_06G086200	GLYMA_06G086200	sp|Q9LJW7|RLP43_ARATH	Receptor-like protein 43 GN=RLP43	ident:15/196 pos:23/196 query:196 hit:711 align:45 bit:29.3	Partial_match_both	Receptor-like protein 43 (AtRLP43)	na	RLP43_ARATH	Q9LJW7	na	RLP43	na	Arabidopsis thaliana (Mouse-ear cress)	3702
High	Master Protein	GLYMA_12G006600	K04798 - prefoldin beta subunit (pfdB, PFDN6) (1 of 2)	0	9.844	17	3	8	3	175	20.4	9.55	15.45	3	0	0.825	0.89095	27.22	101.5	98.5	35.88	85.75	High	High	High	High	High	High	1		3	3	Present Both	1	GLYMA_12G006600	GLYMA_12G006600	sp|Q9C6T1|PMK_ARATH	Phosphomevalonate kinase, peroxisomal GN=PMK	ident:26/175 pos:35/175 query:175 hit:505 align:69 bit:31.6	Partial_match_both	Phosphomevalonate kinase, peroxisomal	5-phosphomevalonate kinase (AtPMK)	PMK_ARATH	Q9C6T1	Q681V6; Q682Q9	PMK	na	Arabidopsis thaliana (Mouse-ear cress)	3702
High	Master Protein	GLYMA_16G044900	K05298 - glyceraldehyde-3-phosphate dehydrogenase (NADP+) (phosphorylating) (GAPA) (1 of 4)	0	150.857	35	13	42	2	403	43.2	7.75	150.27	13	10	0.432	0.399983	10.48	149.6	50.4	21.35	132.22	High	High	Not Found	High	Not Found	Not Found	1		2	1	Only Control	1	GLYMA_16G044900	GLYMA_16G044900	sp|P25856|G3PA1_ARATH	Glyceraldehyde-3-phosphate dehydrogenase GAPA1, chloroplastic GN=GAPA1	ident:347/403 pos:370/403 query:403 hit:396 align:404 bit:657.1	OK	Glyceraldehyde-3-phosphate dehydrogenase GAPA1, chloroplastic	NADP-dependent glyceraldehydephosphate dehydrogenase A subunit 1	G3PA1_ARATH	P25856	Q41184; Q9LSE6	GAPA1	GAPA	Arabidopsis thaliana (Mouse-ear cress)	3702
High	Master Protein	GLYMA_01G005900	K05759 - profilin (PFN) (1 of 8)	0	7.512	10	1	3	1	133	14.2	5.4	6.55	1	0	2.969	0.513972	16.81	50.4	149.6	51.31	7.39	High	Peak Found	Peak Found	Not Found	Peak Found	High	1		3	2	Present Both	1	GLYMA_01G005900	GLYMA_01G005900	sp|Q38904|PROF3_ARATH	Profilin-3 GN=PRO3	ident:107/133 pos:123/133 query:133 hit:134 align:134 bit:232.3	OK	Profilin-3	na	PROF3_ARATH	Q38904	na	PRO3	PFN3	Arabidopsis thaliana (Mouse-ear cress)	3702
High	Master Protein	GLYMA_15G163700	K05768 - gelsolin (GSN) (1 of 4)	0	12.483	4	3	3	2	963	107.7	6.32	7.78	3	0	3.649	0.441926	0	43	157			High	Not Found	Not Found	Not Found	Not Found	High	1		1	1	Missing Both	1	GLYMA_15G163700	GLYMA_15G163700	sp|O65570|VILI4_ARATH	Villin-4 GN=VLN4	ident:745/963 pos:846/963 query:963 hit:974 align:978 bit:1508.8	OK	Villin-4	na	VILI4_ARATH	O65570	F4JPJ2; Q541Y5; Q9SZW9	VLN4	na	Arabidopsis thaliana (Mouse-ear cress)	3702
High	Master Protein	GLYMA_12G205400	K05863 - solute carrier family 25 (mitochondrial adenine nucleotide translocator), member 4/5/6/31 (SLC25A4S, ANT) (1 of 12)	0	253.607	35	19	100	1	367	39.4	9.79	308.78	19	0	1.037	0.999733	93.54	84.2	115.8	45.52	60.12	High	High	High	High	High	High	1		3	3	Present Both	1	GLYMA_12G205400	GLYMA_12G205400	sp|O49447|ADT3_ARATH	ADP,ATP carrier protein 3, mitochondrial GN=AAC3	ident:309/367 pos:334/367 query:367 hit:379 align:376 bit:597.4	OK	ADP,ATP carrier protein 3, mitochondrial	ADP/ATP translocase 3; Adenine nucleotide translocator 3 (ANT 3)	ADT3_ARATH	O49447	Q8L9Y1	AAC3	ANT3	Arabidopsis thaliana (Mouse-ear cress)	3702
High	Master Protein	GLYMA_13G295500	K05863 - solute carrier family 25 (mitochondrial adenine nucleotide translocator), member 4/5/6/31 (SLC25A4S, ANT) (1 of 12)	0	249.737	38	22	99	4	367	39.6	9.85	266.35	22	1	1.073	0.987788	118.24	75.6	124.4	56.62	65.16	High	High	High	High	High	High	1		3	3	Present Both	1	GLYMA_13G295500	GLYMA_13G295500	sp|O49447|ADT3_ARATH	ADP,ATP carrier protein 3, mitochondrial GN=AAC3	ident:311/367 pos:337/367 query:367 hit:379 align:376 bit:603.6	OK	ADP,ATP carrier protein 3, mitochondrial	ADP/ATP translocase 3; Adenine nucleotide translocator 3 (ANT 3)	ADT3_ARATH	O49447	Q8L9Y1	AAC3	ANT3	Arabidopsis thaliana (Mouse-ear cress)	3702
High	Master Protein	GLYMA_13G096600	K06085 - synovial sarcoma, X breakpoint 2 interacting protein (SSX2IP, ADIP) (1 of 2)	0	7.383	3	1	2	1	378	43.4	5.63	5.16	1	0	0.01	6.62973e-17		200		11.9		High	High	Not Found	Not Found	Not Found	Not Found	1		2	0	Only Control	1	GLYMA_13G096600	GLYMA_13G096600	sp|Q9SKR2|SYT1_ARATH	Synaptotagmin-1 GN=SYT1	ident:33/378 pos:55/378 query:378 hit:541 align:142 bit:28.9	Partial_match_both	Synaptotagmin-1	NTMC2T1.1; Synaptotagmin A	SYT1_ARATH	Q9SKR2	Q94AS0	SYT1	SYTA	Arabidopsis thaliana (Mouse-ear cress)	3702
High	Master Protein	GLYMA_01G140600	K06110 - exocyst complex component 3 (EXOC3, SEC6L1) (1 of 4)	0	44.759	7	4	10	4	757	86.1	4.89	27.61	4	0	0.8	0.879779	44.26	137	63	6.77	125.04	High	High	Not Found	High	Peak Found	High	1	Acetyl [N-Term]	2	3	Present Both	1	GLYMA_01G140600	GLYMA_01G140600	sp|Q94AI6|SEC6_ARATH	Exocyst complex component SEC6 GN=SEC6	ident:672/757 pos:717/757 query:757 hit:752 align:757 bit:1371.3	OK	Exocyst complex component SEC6 (AtSec6)	na	SEC6_ARATH	Q94AI6	Q8RVQ6; Q9M9G4	SEC6	na	Arabidopsis thaliana (Mouse-ear cress)	3702
High	Master Protein	GLYMA_02G160500	K07213 - copper chaperone (ATOX1, ATX1, copZ) (1 of 4)	0	15.391	10	2	3	2	130	13.6	4.7	9.26	2	0	2.002	0.774769	38.43	66.6	133.4		35.48	High	Not Found	Not Found	High	Not Found	Peak Found	1		1	2	Only Sample	1	GLYMA_02G160500	GLYMA_02G160500	sp|O82089|CCH_ARATH	Copper transport protein CCH GN=CCH	ident:56/130 pos:62/130 query:130 hit:121 align:66 bit:125.2	Poor_match	Copper transport protein CCH	Copper chaperone CCH	CCH_ARATH	O82089	na	CCH	na	Arabidopsis thaliana (Mouse-ear cress)	3702
High	Master Protein	GLYMA_01G030800	K07466 - replication factor A1 (RFA1, RPA1, rpa) (1 of 23)	0	53.957	28	4	22	3	137	15.2	8.12	82.45	4	1	2.078	0.564242	78.03	65.2	134.8	15.24	62.3	High	High	Peak Found	High	High	High	1		3	3	Present Both	1	GLYMA_01G030800	GLYMA_01G030800	sp|O49453|Y4844_ARATH	Uncharacterized protein At4g28440 GN=CBSDUF1	ident:89/137 pos:106/137 query:137 hit:153 align:132 bit:188.0	OK	Uncharacterized protein At4g28440	na	Y4844_ARATH	O49453	na	OrderedLocusNames=At4g28440	na	Arabidopsis thaliana (Mouse-ear cress)	3702
High	Master Protein	GLYMA_13G153000	K07889 - Ras-related protein Rab-5C (RAB5C) (1 of 3)	0	15.244	15	2	3	2	233	25.6	7.3	6.58	2	0	9.983	0.0183324	53.76	64.1	135.9		132.92	High	Peak Found	Not Found	Peak Found	Not Found	High	1		2	2	Present Both	1	GLYMA_13G153000	GLYMA_13G153000	sp|P31582|RAF2A_ARATH	Ras-related protein RABF2a GN=RABF2A	ident:155/233 pos:168/233 query:233 hit:200 align:187 bit:326.2	OK	Ras-related protein RABF2a (AtRABF2a)	Ras-related protein Rab5A (AtRab5A); Ras-related protein Rha1	RAF2A_ARATH	P31582	na	RABF2A	RAB5A; RHA1	Arabidopsis thaliana (Mouse-ear cress)	3702
High	Master Protein	GLYMA_04G069200	K07936 - GTP-binding nuclear protein Ran (RAN) (1 of 7)	0	26.853	12	3	9	3	290	33.1	8.41	21.53	3	0	1.113	0.972386	70.13	108.8	91.2	19.99	101.68	High	Peak Found	Not Found	Peak Found	High	High	1		2	3	Present Both	1	GLYMA_04G069200	GLYMA_04G069200	sp|Q8H156|RAN3_ARATH	GTP-binding nuclear protein Ran-3 GN=RAN3	ident:217/290 pos:219/290 query:290 hit:221 align:221 bit:461.1	OK	GTP-binding nuclear protein Ran-3	Ras-related nuclear protein 3	RAN3_ARATH	Q8H156	O04148; O04664; O22495	RAN3	na	Arabidopsis thaliana (Mouse-ear cress)	3702
High	Master Protein	GLYMA_04G202900	K08054 - calnexin (CANX) (1 of 3)	0	52.957	15	7	27	4	579	66.1	4.89	84.49	7	1	1.504	0.811372	90.65	80.8	119.2	30.73	23.6	High	High	High	High	High	High	1		3	3	Present Both	1	GLYMA_04G202900	GLYMA_04G202900	sp|P29402|CALX1_ARATH	Calnexin homolog 1 GN=CNX1	ident:404/579 pos:462/579 query:579 hit:530 align:569 bit:789.6	OK	Calnexin homolog 1	na	CALX1_ARATH	P29402	na	CNX1	na	Arabidopsis thaliana (Mouse-ear cress)	3702
High	Master Protein	GLYMA_08G006500	K08054 - calnexin (CANX) (1 of 3)	0	49.929	12	6	25	2	538	61.6	4.94	70.15	6	0	0.961	0.963074	47.55	93.5	106.5	35.84	32.54	High	High	High	High	High	High	1		3	3	Present Both	1	GLYMA_08G006500	GLYMA_08G006500	sp|P29402|CALX1_ARATH	Calnexin homolog 1 GN=CNX1	ident:397/538 pos:455/538 query:538 hit:530 align:536 bit:787.3	OK	Calnexin homolog 1	na	CALX1_ARATH	P29402	na	CNX1	na	Arabidopsis thaliana (Mouse-ear cress)	3702
High	Master Protein	GLYMA_06G073900	K08490 - syntaxin 5 (STX5) (1 of 5)	0	18.087	12	3	6	2	336	37.3	9.07	21.66	3	1	0.944	0.960306	74.93	76.5	123.5	13.06	72.14	High	Peak Found	High	High	High	High	1		3	3	Present Both	1	GLYMA_06G073900	GLYMA_06G073900	sp|Q9LK09|SYP32_ARATH	Syntaxin-32 GN=SYP32	ident:235/336 pos:278/336 query:336 hit:347 align:349 bit:428.7	OK	Syntaxin-32 (AtSYP32)	na	SYP32_ARATH	Q9LK09	na	SYP32	na	Arabidopsis thaliana (Mouse-ear cress)	3702
High	Master Protein	GLYMA_18G089600	K08503 - syntaxin of plants SYP5 (SYP5) (1 of 3)	0	78.98	44	12	29	12	251	28.1	8.9	71.18	12	0	2.048	0.577404	68.16	56.6	143.4	31.25	74.86	High	High	High	High	High	High	1		3	3	Present Both	1	GLYMA_18G089600	GLYMA_18G089600	sp|Q9SA23|SYP51_ARATH	Syntaxin-51 GN=SYP51	ident:168/251 pos:201/251 query:251 hit:232 align:232 bit:349.4	OK	Syntaxin-51 (AtSYP51)	na	SYP51_ARATH	Q9SA23	na	SYP51	na	Arabidopsis thaliana (Mouse-ear cress)	3702
High	Master Protein	GLYMA_09G246700	K08738 - cytochrome c (CYC) (1 of 4)	0	26.725	34	4	17	4	112	12.3	9.31	45.67	4	0	1.477	0.822117	105.82	71.4	128.6	129.67	88.31	High	High	High	High	High	High	1		3	3	Present Both	1	GLYMA_09G246700	GLYMA_09G246700	sp|Q9T0G2|CYC2_ARATH	Cytochrome c-2 GN=CYTC-2	ident:103/112 pos:107/112 query:112 hit:112 align:112 bit:217.2	OK	Cytochrome c-2	Cytochrome c At4g10040	CYC2_ARATH	Q9T0G2	na	CYTC-2	na	Arabidopsis thaliana (Mouse-ear cress)	3702
High	Master Protein	GLYMA_09G214500	K08762 - diazepam-binding inhibitor (GABA receptor modulator, acyl-CoA-binding protein) (DBI, ACBP) (1 of 2)	0	75.223	72	8	39	2	90	10.1	5.19	95.15	8	6	0.857	0.909886	48.99	109.6	90.4	47.3	23.59	High	High	High	High	High	Peak Found	1		3	3	Present Both	1	GLYMA_09G214500	GLYMA_09G214500	sp|P57752|ACBP6_ARATH	Acyl-CoA-binding domain-containing protein 6 GN=ACBP6	ident:64/90 pos:74/90 query:90 hit:92 align:90 bit:135.6	OK	Acyl-CoA-binding domain-containing protein 6 (Acyl-CoA binding protein 6)	Acyl-CoA-binding protein (ACBP)	ACBP6_ARATH	P57752	Q8L9P1	ACBP6	na	Arabidopsis thaliana (Mouse-ear cress)	3702
High	Master Protein	GLYMA_07G112000	K08901 - photosystem II oxygen-evolving enhancer protein 3 (psbQ) (1 of 4)	0	587.393	60	32	196	12	234	24.9	9.8	789.38	32	18	1.1	0.972386	70.63	89.9	110.1	97.29	83.32	High	High	High	High	High	Not Found	1		3	2	Present Both	1	GLYMA_07G112000	GLYMA_07G112000	sp|Q41932|PSBQ2_ARATH	Oxygen-evolving enhancer protein 3-2, chloroplastic GN=PSBQ2	ident:167/234 pos:194/234 query:234 hit:230 align:235 bit:324.7	OK	Oxygen-evolving enhancer protein 3-2, chloroplastic (OEE3)	16 kDa subunit of oxygen evolving system of photosystem II; OEC 16 kDa subunit	PSBQ2_ARATH	Q41932	Q9M0X7	PSBQ2	PSBQB	Arabidopsis thaliana (Mouse-ear cress)	3702
High	Master Protein	GLYMA_03G114600	K08901 - photosystem II oxygen-evolving enhancer protein 3 (psbQ) (1 of 4)	0	504.679	59	28	172	8	232	24.8	9.85	687.77	28	0	1.076	0.985519	46.32	93.1	106.9	73.39	0.93	High	High	High	High	High	Not Found	1		3	2	Present Both	1	GLYMA_03G114600	GLYMA_03G114600	sp|Q41932|PSBQ2_ARATH	Oxygen-evolving enhancer protein 3-2, chloroplastic GN=PSBQ2	ident:163/232 pos:190/232 query:232 hit:230 align:236 bit:312.0	OK	Oxygen-evolving enhancer protein 3-2, chloroplastic (OEE3)	16 kDa subunit of oxygen evolving system of photosystem II; OEC 16 kDa subunit	PSBQ2_ARATH	Q41932	Q9M0X7	PSBQ2	PSBQB	Arabidopsis thaliana (Mouse-ear cress)	3702
High	Master Protein	GLYMA_12G202500	K08902 - photosystem II Psb27 protein (psb27) (1 of 2)	0	477.044	54	16	166	3	173	19	9.94	803.05	16	0	0.95	0.963577	54.48	112.1	87.9	46.25	42.41	High	High	High	High	High	Not Found	1		3	2	Present Both	1	GLYMA_12G202500	GLYMA_12G202500	sp|Q9LR64|PB27A_ARATH	Photosystem II repair protein PSB27-H1, chloroplastic GN=PSB27-1	ident:94/173 pos:112/173 query:173 hit:174 align:139 bit:191.0	OK	Photosystem II repair protein PSB27-H1, chloroplastic (Psb27-H1)	Thylakoid lumenal protein PSB27-H1	PB27A_ARATH	Q9LR64	Q9FPJ9	PSB27-1	na	Arabidopsis thaliana (Mouse-ear cress)	3702
High	Master Protein	GLYMA_13G299200	K08902 - photosystem II Psb27 protein (psb27) (1 of 2)	0	402.807	56	17	147	4	169	18.6	9.94	714.51	17	15	0.795	0.869543	40.83	113.5	86.5	10.36	44.71	High	High	High	High	High	Not Found	1		3	2	Present Both	1	GLYMA_13G299200	GLYMA_13G299200	sp|Q9LR64|PB27A_ARATH	Photosystem II repair protein PSB27-H1, chloroplastic GN=PSB27-1	ident:96/169 pos:111/169 query:169 hit:174 align:138 bit:193.7	OK	Photosystem II repair protein PSB27-H1, chloroplastic (Psb27-H1)	Thylakoid lumenal protein PSB27-H1	PB27A_ARATH	Q9LR64	Q9FPJ9	PSB27-1	na	Arabidopsis thaliana (Mouse-ear cress)	3702
High	Master Protein	GLYMA_13G127200	K08903 - photosystem II 13kDa protein (psb28) (1 of 2)	0	109.643	30	6	57	3	179	20.1	8.84	209.49	6	3	0.732	0.827412	21.9	120.4	79.6	15.35	12.8	High	High	High	High	High	Not Found	1		3	2	Present Both	1	GLYMA_13G127200	GLYMA_13G127200	sp|Q8W0Y8|PSB28_ARATH	Photosystem II reaction center PSB28 protein, chloroplastic GN=PSB28	ident:109/179 pos:138/179 query:179 hit:183 align:182 bit:212.6	OK	Photosystem II reaction center PSB28 protein, chloroplastic	Photosystem II protein W-like	PSB28_ARATH	Q8W0Y8	Q9M0G6	PSB28	na	Arabidopsis thaliana (Mouse-ear cress)	3702
High	Master Protein	GLYMA_10G040600	K08903 - photosystem II 13kDa protein (psb28) (1 of 2)	0	106.1	24	5	50	2	179	20.1	9.04	184.16	5	0	0.791	0.866034	19.07	115.9	84.1	1.53	77.71	High	High	High	High	High	Peak Found	1		3	3	Present Both	1	GLYMA_10G040600	GLYMA_10G040600	sp|Q8W0Y8|PSB28_ARATH	Photosystem II reaction center PSB28 protein, chloroplastic GN=PSB28	ident:108/179 pos:136/179 query:179 hit:183 align:182 bit:210.3	OK	Photosystem II reaction center PSB28 protein, chloroplastic	Photosystem II protein W-like	PSB28_ARATH	Q8W0Y8	Q9M0G6	PSB28	na	Arabidopsis thaliana (Mouse-ear cress)	3702
High	Master Protein	GLYMA_06G321900	K08905 - photosystem I subunit V (psaG) (1 of 2)	0	10.579	15	2	5	2	164	17.7	9.7	12.69	2	0	0.746	0.847305	9.89	97.6	102.4	26.51	52.75	High	High	High	High	High	Not Found	1		3	2	Present Both	1	GLYMA_06G321900	GLYMA_06G321900	sp|Q9S7N7|PSAG_ARATH	Photosystem I reaction center subunit V, chloroplastic GN=PSAG	ident:106/164 pos:123/164 query:164 hit:160 align:155 bit:208.0	OK	Photosystem I reaction center subunit V, chloroplastic	PSI-G	PSAG_ARATH	Q9S7N7	Q42310	PSAG	na	Arabidopsis thaliana (Mouse-ear cress)	3702
High	Master Protein	GLYMA_02G064700	K08907 - light-harvesting complex I chlorophyll a/b binding protein 1 (LHCA1) (1 of 2)	0	18.431	20	3	4	3	246	26.7	6.68	8.82	3	0	1.089	0.977509	0	95.8	104.2			High	High	Not Found	Not Found	High	Not Found	1		2	1	Only Control	1	GLYMA_02G064700	GLYMA_02G064700	sp|Q01667|CAB6_ARATH	Chlorophyll a-b binding protein 6, chloroplastic GN=LHCA1	ident:202/246 pos:218/246 query:246 hit:241 align:243 bit:392.9	OK	Chlorophyll a-b binding protein 6, chloroplastic	LHCI-730; LHCII type III CAB-6; Light-harvesting complex protein Lhca1	CAB6_ARATH	Q01667	B9DHK2; Q9C5R7	LHCA1	CAB6	Arabidopsis thaliana (Mouse-ear cress)	3702
High	Master Protein	GLYMA_02G309500	K08909 - light-harvesting complex I chlorophyll a/b binding protein 3 (LHCA3) (1 of 2)	0	76.908	35	6	33	6	276	29.8	8.66	96.58	6	0	0.523	0.575674	11.13	151.9	48.1	31.29	89.17	High	High	High	High	High	Peak Found	1		3	3	Present Both	1	GLYMA_02G309500	GLYMA_02G309500	sp|Q9SY97|LHCA3_ARATH	Photosystem I chlorophyll a/b-binding protein 3-1, chloroplastic GN=LHCA3	ident:232/276 pos:249/276 query:276 hit:273 align:276 bit:454.9	OK	Photosystem I chlorophyll a/b-binding protein 3-1, chloroplastic (Lhca3*1)	LHCI type III LHCA3	LHCA3_ARATH	Q9SY97	Q0WR83; Q2V2R9; Q43381; Q8LCR7	LHCA3	na	Arabidopsis thaliana (Mouse-ear cress)	3702
High	Master Protein	GLYMA_04G167900	K08910 - light-harvesting complex I chlorophyll a/b binding protein 4 (LHCA4) (1 of 2)	0	46.928	16	2	7	2	252	28	7.42	26.34	2	0	0.967	0.961313	84.04	144.9	55.1	19.21		High	High	High	Not Found	Peak Found	Not Found	1		3	1	Only Control	1	GLYMA_04G167900	GLYMA_04G167900	sp|P27521|CA4_ARATH	Chlorophyll a-b binding protein 4, chloroplastic GN=LHCA4	ident:211/252 pos:227/252 query:252 hit:251 align:249 bit:444.5	OK	Chlorophyll a-b binding protein 4, chloroplastic	LHCI type III CAB-4	CA4_ARATH	P27521	na	LHCA4	CAB4	Arabidopsis thaliana (Mouse-ear cress)	3702
High	Master Protein	GLYMA_08G082900	K08912 - light-harvesting complex II chlorophyll a/b binding protein 1 (LHCB1) (1 of 5)	0	229.745	59	15	82	4	263	27.9	5.43	363.09	15	10	0.605	0.688729	26.72	141.9	58.1	21.81	21.59	High	High	High	High	High	Peak Found	1		3	3	Present Both	1	GLYMA_08G082900	GLYMA_08G082900	sp|P04778|CB1C_ARATH	Chlorophyll a-b binding protein 1, chloroplastic GN=LHCB1.3	ident:236/263 pos:249/263 query:263 hit:267 align:266 bit:472.2	OK	Chlorophyll a-b binding protein 1, chloroplastic	Chlorophyll a-b protein 140 (CAB-140); LHCII type I CAB-1	CB1C_ARATH	P04778	P83754	LHCB1.3	AB140; CAB1	Arabidopsis thaliana (Mouse-ear cress)	3702
High	Master Protein	GLYMA_05G128000	K08912 - light-harvesting complex II chlorophyll a/b binding protein 1 (LHCB1) (1 of 5)	0	219.745	59	14	77	6	263	27.9	5.43	330.95	14	0	0.42	0.368867	8.4	146.9	53.1	53.47	63.42	High	High	High	High	High	Peak Found	1		3	3	Present Both	1	GLYMA_05G128000	GLYMA_05G128000	sp|P04778|CB1C_ARATH	Chlorophyll a-b binding protein 1, chloroplastic GN=LHCB1.3	ident:238/263 pos:249/263 query:263 hit:267 align:266 bit:474.9	OK	Chlorophyll a-b binding protein 1, chloroplastic	Chlorophyll a-b protein 140 (CAB-140); LHCII type I CAB-1	CB1C_ARATH	P04778	P83754	LHCB1.3	AB140; CAB1	Arabidopsis thaliana (Mouse-ear cress)	3702
High	Master Protein	GLYMA_16G165500	K08912 - light-harvesting complex II chlorophyll a/b binding protein 1 (LHCB1) (1 of 5)	0	193.367	55	14	70	4	264	28	5.41	303.37	14	0	0.394	0.319041	5.49	172.8	27.2	81.6		High	High	High	High	High	Not Found	1		3	2	Present Both	1	GLYMA_16G165500	GLYMA_16G165500	sp|P04778|CB1C_ARATH	Chlorophyll a-b binding protein 1, chloroplastic GN=LHCB1.3	ident:234/264 pos:249/264 query:264 hit:267 align:267 bit:470.3	OK	Chlorophyll a-b binding protein 1, chloroplastic	Chlorophyll a-b protein 140 (CAB-140); LHCII type I CAB-1	CB1C_ARATH	P04778	P83754	LHCB1.3	AB140; CAB1	Arabidopsis thaliana (Mouse-ear cress)	3702
High	Master Protein	GLYMA_16G165200	K08912 - light-harvesting complex II chlorophyll a/b binding protein 1 (LHCB1) (1 of 5)	0	165.778	55	14	61	4	264	28	5.41	268.01	14	0	0.268	0.0794748	1.34	175.7	24.3	75.58	42.42	High	High	High	High	High	Peak Found	1		3	3	Present Both	1	GLYMA_16G165200	GLYMA_16G165200	sp|P04778|CB1C_ARATH	Chlorophyll a-b binding protein 1, chloroplastic GN=LHCB1.3	ident:233/264 pos:249/264 query:264 hit:267 align:267 bit:469.5	OK	Chlorophyll a-b binding protein 1, chloroplastic	Chlorophyll a-b protein 140 (CAB-140); LHCII type I CAB-1	CB1C_ARATH	P04778	P83754	LHCB1.3	AB140; CAB1	Arabidopsis thaliana (Mouse-ear cress)	3702
High	Master Protein	GLYMA_02G305400	K08913 - light-harvesting complex II chlorophyll a/b binding protein 2 (LHCB2) (1 of 2)	0	97.724	40	8	40	4	265	28.6	5.66	139.66	8	0	0.415	0.36053	11.16	163.3	36.7	50.48	7.35	High	High	High	High	High	Not Found	1		3	2	Present Both	1	GLYMA_02G305400	GLYMA_02G305400	sp|Q9SHR7|CB21_ARATH	Chlorophyll a-b binding protein 2.1, chloroplastic GN=LHCB2.1	ident:237/265 pos:252/265 query:265 hit:265 align:265 bit:498.0	OK	Chlorophyll a-b binding protein 2.1, chloroplastic	Photosystem II light harvesting complex gene 2.1; Protein LIGHT-HARVESTING CHLOROPHYLL B-BINDING 2.1	CB21_ARATH	Q9SHR7	Q9SYW9; Q9XF86	LHCB2.1	na	Arabidopsis thaliana (Mouse-ear cress)	3702
High	Master Protein	GLYMA_12G219300	K08914 - light-harvesting complex II chlorophyll a/b binding protein 3 (LHCB3) (1 of 2)	0	70.699	27	7	17	7	268	28.8	5.27	66.38	7	0	0.723	0.819947	20.28	118.5	81.5	78.01	10.3	High	High	High	High	High	Not Found	1		3	2	Present Both	1	GLYMA_12G219300	GLYMA_12G219300	sp|Q9S7M0|CB3_ARATH	Chlorophyll a-b binding protein 3, chloroplastic GN=LHCB3	ident:237/268 pos:250/268 query:268 hit:265 align:268 bit:488.4	OK	Chlorophyll a-b binding protein 3, chloroplastic	Light-harvesting chlorophyll B-binding protein 3 (LHCB3*1; Lhcb3)	CB3_ARATH	Q9S7M0	C0Z239; Q42016	LHCB3	na	Arabidopsis thaliana (Mouse-ear cress)	3702
High	Master Protein	GLYMA_16G205200	K08916 - light-harvesting complex II chlorophyll a/b binding protein 5 (LHCB5) (1 of 4)	0	230.694	37	13	73	7	289	30.7	6	258.98	13	0	0.433	0.404799	8.82	128.2	71.8	40.65	36.95	High	High	High	High	High	Not Found	1		3	2	Present Both	1	GLYMA_16G205200	GLYMA_16G205200	sp|Q9XF89|CB5_ARATH	Chlorophyll a-b binding protein CP26, chloroplastic GN=LHCB5	ident:229/289 pos:251/289 query:289 hit:280 align:280 bit:426.4	OK	Chlorophyll a-b binding protein CP26, chloroplastic	LHCB5; LHCIIc; Light-harvesting complex II protein 5	CB5_ARATH	Q9XF89	Q8LAB1	LHCB5	na	Arabidopsis thaliana (Mouse-ear cress)	3702
High	Master Protein	GLYMA_10G177200	K08916 - light-harvesting complex II chlorophyll a/b binding protein 5 (LHCB5) (1 of 4)	0	210.85	40	15	56	9	287	30.8	6.8	198.84	15	7	0.612	0.69962	16.86	128.5	71.5	24.9	34.61	High	High	High	High	High	Peak Found	1		3	3	Present Both	1	GLYMA_10G177200	GLYMA_10G177200	sp|Q9XF89|CB5_ARATH	Chlorophyll a-b binding protein CP26, chloroplastic GN=LHCB5	ident:236/287 pos:252/287 query:287 hit:280 align:288 bit:426.0	OK	Chlorophyll a-b binding protein CP26, chloroplastic	LHCB5; LHCIIc; Light-harvesting complex II protein 5	CB5_ARATH	Q9XF89	Q8LAB1	LHCB5	na	Arabidopsis thaliana (Mouse-ear cress)	3702
High	Master Protein	GLYMA_15G052400	K08917 - light-harvesting complex II chlorophyll a/b binding protein 6 (LHCB6) (1 of 3)	0	28.059	23	3	8	3	260	27.6	6.6	32.66	3	0	0.376	0.278906	7.83	154.7	45.3	53.02	29.47	High	High	High	High	High	Not Found	1		3	2	Present Both	1	GLYMA_15G052400	GLYMA_15G052400	sp|Q9C639|LHCA5_ARATH	Photosystem I chlorophyll a/b-binding protein 5, chloroplastic GN=LHCA5	ident:94/260 pos:128/260 query:260 hit:256 align:248 bit:136.3	Poor_match	Photosystem I chlorophyll a/b-binding protein 5, chloroplastic (Lhca5)	LHCI type III LHCA5	LHCA5_ARATH	Q9C639	B9DFW4; Q8L9Y7; Q9XF85	LHCA5	na	Arabidopsis thaliana (Mouse-ear cress)	3702
High	Master Protein	GLYMA_08G074000	K08917 - light-harvesting complex II chlorophyll a/b binding protein 6 (LHCB6) (1 of 3)	0	5.237	3	2	5	2	258	27.4	7.49	7.8	2	0	0.39	0.315142	8.42	158.4	41.6	46.71	41.19	High	High	High	Peak Found	High	Not Found	1		3	2	Present Both	1	GLYMA_08G074000	GLYMA_08G074000	sp|Q9C639|LHCA5_ARATH	Photosystem I chlorophyll a/b-binding protein 5, chloroplastic GN=LHCA5	ident:94/258 pos:126/258 query:258 hit:256 align:244 bit:133.3	Poor_match	Photosystem I chlorophyll a/b-binding protein 5, chloroplastic (Lhca5)	LHCI type III LHCA5	LHCA5_ARATH	Q9C639	B9DFW4; Q8L9Y7; Q9XF85	LHCA5	na	Arabidopsis thaliana (Mouse-ear cress)	3702
High	Master Protein	GLYMA_07G089600	K09313 - homeobox protein cut-like (CUTL) (1 of 2)	0	280.817	29	25	66	5	690	79.5	5.34	215.17	25	17	1.106	0.972386	77.71	123.2	76.8	38.46	76.03	High	High	Not Found	High	Not Found	High	1	Acetyl [N-Term]	2	2	Present Both	1	GLYMA_07G089600	GLYMA_07G089600	sp|Q9LS42|CASP_ARATH	Protein CASP GN=CASP	ident:560/690 pos:622/690 query:690 hit:689 align:694 bit:1115.9	OK	Protein CASP	na	CASP_ARATH	Q9LS42	Q93ZW7	CASP	na	Arabidopsis thaliana (Mouse-ear cress)	3702
High	Master Protein	GLYMA_09G187100	K09313 - homeobox protein cut-like (CUTL) (1 of 2)	0	234.501	25	23	59	3	692	79.8	5.34	187.17	23	0	0.991	0.947884	90.09	100.4	99.6	6.22	76.74	High	High	Not Found	High	High	High	1		2	3	Present Both	1	GLYMA_09G187100	GLYMA_09G187100	sp|Q9LS42|CASP_ARATH	Protein CASP GN=CASP	ident:554/692 pos:615/692 query:692 hit:689 align:687 bit:1106.3	OK	Protein CASP	na	CASP_ARATH	Q9LS42	Q93ZW7	CASP	na	Arabidopsis thaliana (Mouse-ear cress)	3702
High	Master Protein	GLYMA_05G219400	K09490 - heat shock 70kDa protein 5 (HSPA5, BIP) (1 of 4)	0	307.264	40	28	92	1	668	73.6	5.19	292.71	28	30	3.042	0.234399	113.81	47	153	12.19	122.59	High	High	Not Found	High	High	High	1		2	3	Present Both	1	GLYMA_05G219400	GLYMA_05G219400	sp|Q39043|MD37F_ARATH	Mediator of RNA polymerase II transcription subunit 37f GN=MED37F	ident:613/668 pos:642/668 query:668 hit:668 align:668 bit:1242.6	OK	Mediator of RNA polymerase II transcription subunit 37f	Heat shock 70 kDa protein 12; Heat shock protein 70-12 (AtHsp70-12); Luminal-binding protein 2 (AtBP2; BiP2)	MD37F_ARATH	Q39043	Q39042	MED37F	BIP; BIP2; HSP70-11; MED37_6	Arabidopsis thaliana (Mouse-ear cress)	3702
High	Master Protein	GLYMA_16G208700	K09495 - T-complex protein 1 subunit gamma (CCT3, TRIC5) (1 of 5)	0	12.822	3	1	3	1	554	60.2	6.18	12.29	1	0	1.202	0.992627	86.8	90.8	109.2	14.63	69.78	High	High	Not Found	Peak Found	Peak Found	High	1		2	3	Present Both	1	GLYMA_16G208700	GLYMA_16G208700	sp|Q84WV1|TCPG_ARATH	T-complex protein 1 subunit gamma GN=CCT3	ident:486/554 pos:523/554 query:554 hit:555 align:555 bit:987.3	OK	T-complex protein 1 subunit gamma (TCP-1-gamma)	CCT-gamma; Chaperonin CCT3	TCPG_ARATH	Q84WV1	O81503	CCT3	na	Arabidopsis thaliana (Mouse-ear cress)	3702
High	Master Protein	GLYMA_09G158200	K09495 - T-complex protein 1 subunit gamma (CCT3, TRIC5) (1 of 5)	0.009	1.943	1	1	3	1	554	60.2	6.27	5.83	1	0	0.512	0.601904	16.55	132.3	67.7	21.67	54.66	High	High	Peak Found	Peak Found	Peak Found	Peak Found	1		3	3	Present Both	1	GLYMA_09G158200	GLYMA_09G158200	sp|Q84WV1|TCPG_ARATH	T-complex protein 1 subunit gamma GN=CCT3	ident:484/554 pos:520/554 query:554 hit:555 align:555 bit:983.4	OK	T-complex protein 1 subunit gamma (TCP-1-gamma)	CCT-gamma; Chaperonin CCT3	TCPG_ARATH	Q84WV1	O81503	CCT3	na	Arabidopsis thaliana (Mouse-ear cress)	3702
High	Master Protein	GLYMA_08G364000	K09498 - T-complex protein 1 subunit zeta (CCT6) (1 of 3)	0	22.366	7	3	13	3	535	58.9	5.85	27.78	3	0	0.742	0.835042	33.76	130.5	69.5	43.79	131.69	High	High	Peak Found	High	High	High	1		3	3	Present Both	1	GLYMA_08G364000	GLYMA_08G364000	sp|Q9M888|TCPZA_ARATH	T-complex protein 1 subunit zeta 1 GN=CCT6A	ident:483/535 pos:516/535 query:535 hit:535 align:535 bit:1007.3	OK	T-complex protein 1 subunit zeta 1 (TCP-1-zeta 1)	CCT-zeta 1; Chaperonin CCT6A	TCPZA_ARATH	Q9M888	Q8LFN3; Q94EZ9	CCT6A	na	Arabidopsis thaliana (Mouse-ear cress)	3702
High	Master Protein	GLYMA_03G218300	K09517 - DnaJ homolog subfamily B member 11 (DNAJB11) (1 of 3)	0	24.823	18	4	8	4	343	38.8	6.74	19.97	4	0	1.042	0.998965	62.32	56.9	143.1	18.5	85.93	High	High	High	High	High	High	1		3	3	Present Both	1	GLYMA_03G218300	GLYMA_03G218300	sp|Q9LZK5|DNJ19_ARATH	DnaJ protein ERDJ3B GN=ERDJ3B	ident:263/343 pos:308/343 query:343 hit:346 align:346 bit:548.1	OK	DnaJ protein ERDJ3B	Chaperone protein dnaJ 19 (AtDjB19; AtJ19); Endoplasmic reticulum dnaJ domain-containing protein 3B (AtERdj3B); Protein SCJ1 homolog ERDJ3B	DNJ19_ARATH	Q9LZK5	na	ERDJ3B	B19	Arabidopsis thaliana (Mouse-ear cress)	3702
High	Master Protein	GLYMA_10G049900	K09539 - DnaJ homolog subfamily C member 19 (DNAJC19) (1 of 4)	0	11.273	17	2	6	2	113	12.2	10.13	18	2	0	0.927	0.952604	16.94	124.9	75.1	13.36	41.03	High	High	Not Found	High	Peak Found	Not Found	1		2	2	Present Both	1	GLYMA_10G049900	GLYMA_10G049900	sp|Q8RV04|TI141_ARATH	Mitochondrial import inner membrane translocase subunit TIM14-1 GN=TIM14-1	ident:85/113 pos:97/113 query:113 hit:112 align:111 bit:178.3	OK	Mitochondrial import inner membrane translocase subunit TIM14-1	Chaperone DnaJ-domain containing protein 1	TI141_ARATH	Q8RV04	na	TIM14-1	na	Arabidopsis thaliana (Mouse-ear cress)	3702
High	Master Protein	GLYMA_02G120500	K09564 - peptidyl-prolyl isomerase E (cyclophilin E) (PPIE) (1 of 2)	0	42.19	52	6	10	3	172	19.5	4.63	31.85	6	2	0.99	0.978851	63.66	95.9	104.1	15	49.44	High	Peak Found	Not Found	Peak Found	High	Not Found	1		2	2	Present Both	1	GLYMA_02G120500	GLYMA_02G120500	sp|Q9FNR1|RBG3_ARATH	Glycine-rich RNA-binding protein 3, mitochondrial GN=RBG3	ident:34/172 pos:51/172 query:172 hit:309 align:75 bit:76.3	Partial_match_both	Glycine-rich RNA-binding protein 3, mitochondrial (AtGR-RBP3)	AtRBG3; Mitochondrial RNA-binding protein 2a (At-mRBP2a); Organelle RRM domain-containing protein 3	RBG3_ARATH	Q9FNR1	na	RBG3	na	Arabidopsis thaliana (Mouse-ear cress)	3702
High	Master Protein	GLYMA_03G086100	K09569 - FK506-binding protein 2 [EC:5.2.1.8] (FKBP2) (1 of 2)	0	80.402	57	8	37	3	147	16	6.79	124.48	8	4	2.041	0.581816	105	30.3	169.7	97.4	56.8	High	High	High	High	High	High	1		3	3	Present Both	1	GLYMA_03G086100	GLYMA_03G086100	sp|Q38936|FK152_ARATH	Peptidyl-prolyl cis-trans isomerase FKBP15-2 GN=FKBP15-2	ident:106/147 pos:120/147 query:147 hit:163 align:137 bit:223.0	OK	Peptidyl-prolyl cis-trans isomerase FKBP15-2 (PPIase FKBP15-2)	15 kDa FK506-binding protein (15 kDa FKBP); FK506-binding protein 15-2 (AtFKBP15-2); FK506-binding protein 2-2; Immunophilin FKBP15-2; Rotamase	FK152_ARATH	Q38936	Q9FJL2	FKBP15-2	na	Arabidopsis thaliana (Mouse-ear cress)	3702
High	Master Protein	GLYMA_04G082500	K09834 - tocopherol cyclase (VTE1, SXD1) (1 of 2)	0	11.8	5	1	2	1	489	54.9	6.05	8.38	1	0	0.01	6.62973e-17		200				High	High	Not Found	Not Found	Not Found	Not Found	1		2	0	Only Control	1	GLYMA_04G082500	GLYMA_04G082500	sp|Q94FY7|TOCC_ARATH	Tocopherol cyclase, chloroplastic GN=VTE1	ident:325/489 pos:381/489 query:489 hit:488 align:469 bit:691.4	OK	Tocopherol cyclase, chloroplastic	Sucrose export defective 1; Vitamin E pathway gene 1 protein	TOCC_ARATH	Q94FY7	O65524	VTE1	SXD1	Arabidopsis thaliana (Mouse-ear cress)	3702
Medium	Master Protein	GLYMA_10G086700	K09835 - prolycopene isomerase (crtISO, crtH) (1 of 2)	0.017	1.381	2	1	4	1	609	66.8	6.73	0	1	0	0.649	0.744349	14.08	121.3	78.7	28.49	2.19	High	Peak Found	High	High	High	Not Found	1		3	2	Present Both	1	GLYMA_10G086700	GLYMA_10G086700	sp|Q9M9Y8|CRTSO_ARATH	Prolycopene isomerase, chloroplastic GN=CRTISO	ident:440/609 pos:473/609 query:609 hit:595 align:512 bit:918.7	OK	Prolycopene isomerase, chloroplastic (CrtISO)	Carotenoid and chloroplast regulation protein 2; Carotenoid isomerase	CRTSO_ARATH	Q9M9Y8	na	CRTISO	CCR2	Arabidopsis thaliana (Mouse-ear cress)	3702
Medium	Master Protein	GLYMA_03G247000	K10046 - GDP-D-mannose 3', 5'-epimerase (GME) (1 of 5)	0.016	1.477	2	1	1	1	379	42.8	6.39	0	1	0	0.01	6.62973e-17		200		28.52		High	Peak Found	Not Found	Not Found	Not Found	Not Found	1		2	0	Only Control	1	GLYMA_03G247000	GLYMA_03G247000	sp|Q93VR3|GME_ARATH	GDP-mannose 3,5-epimerase GN=HVA22J	ident:338/379 pos:357/379 query:379 hit:377 align:377 bit:715.7	OK	GDP-mannose 3,5-epimerase (GDP-Man 3,5-epimerase)	na	GME_ARATH	Q93VR3	na	OrderedLocusNames=At5g28840	na	Arabidopsis thaliana (Mouse-ear cress)	3702
High	Master Protein	GLYMA_07G185700	K10206 - LL-diaminopimelate aminotransferase (E2.6.1.83) (1 of 3)	0.004	2.093	3	1	2	1	458	49.8	6.65	1.96	1	0	0.917	0.952604	10.94	104.3	95.7	12.37		High	High	Not Found	Peak Found	Not Found	Not Found	1		2	1	Only Control	1	GLYMA_07G185700	GLYMA_07G185700	sp|Q93ZN9|DAPAT_ARATH	LL-diaminopimelate aminotransferase, chloroplastic GN=DAP	ident:370/458 pos:417/458 query:458 hit:461 align:461 bit:744.6	OK	LL-diaminopimelate aminotransferase, chloroplastic (AtDAP-AT; DAP-AT; DAP-aminotransferase; LL-DAP-aminotransferase)	Protein ABERRANT GROWTH AND DEATH 2	DAPAT_ARATH	Q93ZN9	O81885	DAP	AGD2	Arabidopsis thaliana (Mouse-ear cress)	3702
High	Master Protein	GLYMA_02G273300	K10258 - very-long-chain enoyl-CoA reductase (TER, TSC13, CER10) (1 of 2)	0	34.308	13	3	11	1	309	35.9	9.54	29.63	3	3	0.668	0.770215	16.78	114.1	85.9	30.61	95.34	High	High	Peak Found	Peak Found	Peak Found	Not Found	1		3	2	Present Both	1	GLYMA_02G273300	GLYMA_02G273300	sp|Q9M2U2|TECR_ARATH	Very-long-chain enoyl-CoA reductase GN=ECR	ident:252/309 pos:281/309 query:309 hit:310 align:310 bit:538.1	OK	Very-long-chain enoyl-CoA reductase	Enoyl-CoA reductase (AtECR); Protein ECERIFERUM 10; Synaptic glycoprotein SC2-like protein	TECR_ARATH	Q9M2U2	na	ECR	AtTSC13; CER10	Arabidopsis thaliana (Mouse-ear cress)	3702
High	Master Protein	GLYMA_11G011300	K10601 - E3 ubiquitin-protein ligase synoviolin (SYVN1, HRD1) (1 of 2)	0	8.046	2	1	3	1	554	62.8	7.2	9.81	1	0	0.01	6.62973e-17		200		1.65		High	High	Not Found	Not Found	Not Found	Not Found	1		2	0	Only Control	1	GLYMA_11G011300	GLYMA_11G011300	sp|Q9LW77|HRD1A_ARATH	ERAD-associated E3 ubiquitin-protein ligase HRD1A GN=HRD1A	ident:351/554 pos:408/554 query:554 hit:492 align:542 bit:671.0	OK	ERAD-associated E3 ubiquitin-protein ligase HRD1A (AtHrd1A)	RING-type E3 ubiquitin transferase HRD1A	HRD1A_ARATH	Q9LW77	na	HRD1A	na	Arabidopsis thaliana (Mouse-ear cress)	3702
High	Master Protein	GLYMA_15G055000	K10738 - DNA helicase MCM9 [EC:3.6.4.12] (MCM9) (1 of 1)	0	3.007	4	1	2	1	653	72.8	6.47	5.45	1	0	1.107	0.972386	14.6	94.9	105.1	13.86		High	Peak Found	Not Found	High	Not Found	Not Found	1	Phospho [T389]	2	1	Only Control	1	GLYMA_15G055000	GLYMA_15G055000	sp|F4IFF3|MCM9_ARATH	Probable DNA helicase MCM9 GN=MCM9	ident:485/653 pos:558/653 query:653 hit:646 align:627 bit:1019.6	OK	Probable DNA helicase MCM9	Minichromosome maintenance 9 (AtMCM9)	MCM9_ARATH	F4IFF3	Q9ZPT4	MCM9	na	Arabidopsis thaliana (Mouse-ear cress)	3702
High	Master Protein	GLYMA_03G152100	K11087 - small nuclear ribonucleoprotein D1 (SNRPD1, SMD1) (1 of 4)	0	21.785	27	2	4	1	114	12.6	11.06	17.39	2	0	1.371	0.99007	0.71	84.3	115.7	0.68		High	High	Not Found	High	Not Found	Not Found	1		2	1	Only Control	1	GLYMA_03G152100	GLYMA_03G152100	sp|Q9SY09|SMD1B_ARATH	Small nuclear ribonucleoprotein SmD1b GN=SMD1B	ident:90/114 pos:94/114 query:114 hit:116 align:96 bit:182.6	OK	Small nuclear ribonucleoprotein SmD1b (AtSmD1-b)	na	SMD1B_ARATH	Q9SY09	F4JHV8	SMD1B	na	Arabidopsis thaliana (Mouse-ear cress)	3702
High	Master Protein	GLYMA_05G185800	K11088 - small nuclear ribonucleoprotein D3 (SNRPD3, SMD3) (1 of 2)	0	87.093	34	5	29	5	131	14.2	10.42	87.09	5	0	1.347	0.870724	83.21	101.3	98.7	53.68	74.89	High	High	High	High	High	High	1		3	3	Present Both	1	GLYMA_05G185800	GLYMA_05G185800	sp|Q9LM92|SMD3B_ARATH	Small nuclear ribonucleoprotein SmD3b GN=SMD3B	ident:112/131 pos:116/131 query:131 hit:131 align:132 bit:213.4	OK	Small nuclear ribonucleoprotein SmD3b (SmD3-b)	snRNP core protein D3-b	SMD3B_ARATH	Q9LM92	Q8LC48; Q9LMW6	SMD3B	na	Arabidopsis thaliana (Mouse-ear cress)	3702
High	Master Protein	GLYMA_03G253300	K11091 - U1 small nuclear ribonucleoprotein A (SNRPA) (1 of 2)	0	18.689	22	4	6	4	241	26.9	9.44	14.92	4	0	1.035	0.998965	46.8	108.6	91.4	44.33	118.35	High	Peak Found	Peak Found	High	High	High	1		3	3	Present Both	1	GLYMA_03G253300	GLYMA_03G253300	sp|Q39244|RU1A_ARATH	U1 small nuclear ribonucleoprotein A GN=U1A	ident:177/241 pos:204/241 query:241 hit:250 align:249 bit:347.1	OK	U1 small nuclear ribonucleoprotein A (U1 snRNP protein A)	na	RU1A_ARATH	Q39244	na	U1A	na	Arabidopsis thaliana (Mouse-ear cress)	3702
High	Master Protein	GLYMA_10G123200	K11092 - U2 small nuclear ribonucleoprotein A' (SNRPA1) (1 of 2)	0	2.826	3	1	2	1	287	32.7	5.58	5.22	1	0	1.125	0.974587	14.44	94.1	105.9	2.67	13.96	High	Peak Found	Not Found	High	Peak Found	Not Found	1		2	2	Present Both	1	GLYMA_10G123200	GLYMA_10G123200	sp|P43333|RU2A_ARATH	U2 small nuclear ribonucleoprotein A' GN=TBR	ident:188/287 pos:212/287 query:287 hit:249 align:237 bit:378.3	OK	U2 small nuclear ribonucleoprotein A' (U2 snRNP A')	na	RU2A_ARATH	P43333	O04497	OrderedLocusNames=At1g09760	na	Arabidopsis thaliana (Mouse-ear cress)	3702
High	Master Protein	GLYMA_10G021900	K11095 - U1 small nuclear ribonucleoprotein C (SNRPC) (1 of 2)	0	13.686	9	1	3	1	207	22.3	9.03	12.59	1	0	0.975	0.972386	8.65	101.3	98.7	8.67		High	High	Not Found	High	Not Found	Not Found	1		2	1	Only Control	1	GLYMA_10G021900	GLYMA_10G021900	sp|Q56XE4|RU1C_ARATH	U1 small nuclear ribonucleoprotein C GN=U1A	ident:90/207 pos:98/207 query:207 hit:207 align:142 bit:157.9	Poor_match	U1 small nuclear ribonucleoprotein C (U1 snRNP C; U1-C; U1C)	na	RU1C_ARATH	Q56XE4	Q84VV2; Q9ZR19	OrderedLocusNames=At4g03120	na	Arabidopsis thaliana (Mouse-ear cress)	3702
High	Master Protein	GLYMA_06G157100	K11097 - small nuclear ribonucleoprotein E (SNRPE, SME) (1 of 4)	0	44.793	65	5	13	5	88	10.3	9.99	29.7	5	0	1.209	0.947884	70.19	51.1	148.9	1.39	108.99	High	High	Not Found	High	Not Found	High	1		2	2	Present Both	1	GLYMA_06G157100	GLYMA_06G157100	sp|Q9FKB0|LSM5_ARATH	Sm-like protein LSM5 GN=LSM5	ident:28/88 pos:44/88 query:88 hit:88 align:78 bit:47.4	Poor_match	Sm-like protein LSM5 (AtLSM5)	Protein SUPERSENSITIVE TO ABA AND DROUGHT 1 (AtSAD1); U6 snRNA-associated Sm-like protein LSM5	LSM5_ARATH	Q9FKB0	Q0WMZ9	LSM5	na	Arabidopsis thaliana (Mouse-ear cress)	3702
High	Master Protein	GLYMA_19G195100	K11099 - small nuclear ribonucleoprotein G (SNRPG, SMG) (1 of 3)	0	49.55	67	4	16	2	79	8.8	9.25	57.64	4	0	1.317	0.879779	79.94	116.9	83.1	52.77	64.84	High	High	High	High	High	High	1		3	3	Present Both	1	GLYMA_19G195100	GLYMA_19G195100	sp|O82221|RUXG_ARATH	Probable small nuclear ribonucleoprotein G GN=RXW24L	ident:73/79 pos:76/79 query:79 hit:80 align:79 bit:150.6	OK	Probable small nuclear ribonucleoprotein G (snRNP-G)	Sm protein G (Sm-G; SmG)	RUXG_ARATH	O82221	na	OrderedLocusNames=At2g23930	na	Arabidopsis thaliana (Mouse-ear cress)	3702
High	Master Protein	GLYMA_11G086200	K11099 - small nuclear ribonucleoprotein G (SNRPG, SMG) (1 of 3)	0	42.281	67	4	11	2	79	8.8	9.25	34.15	4	3	0.758	0.850813	33.72	138.2	61.8	1.94	91.61	High	High	Peak Found	High	Peak Found	High	1		3	3	Present Both	1	GLYMA_11G086200	GLYMA_11G086200	sp|O82221|RUXG_ARATH	Probable small nuclear ribonucleoprotein G GN=RXW24L	ident:71/79 pos:75/79 query:79 hit:80 align:79 bit:148.3	OK	Probable small nuclear ribonucleoprotein G (snRNP-G)	Sm protein G (Sm-G; SmG)	RUXG_ARATH	O82221	na	OrderedLocusNames=At2g23930	na	Arabidopsis thaliana (Mouse-ear cress)	3702
High	Master Protein	GLYMA_19G110900	K11128 - H/ACA ribonucleoprotein complex subunit 1 (GAR1, NOLA1) (1 of 2)	0	19.455	23	4	10	4	204	20.7	11.49	30.55	4	0	0.857	0.909886	25.88	107.6	92.4	39.03	61.63	High	High	Peak Found	High	High	Peak Found	1		3	3	Present Both	1	GLYMA_19G110900	GLYMA_19G110900	sp|Q8VZT0|NLAL1_ARATH	Putative H/ACA ribonucleoprotein complex subunit 1-like protein 1 GN=NOI4	ident:111/204 pos:119/204 query:204 hit:202 align:151 bit:191.4	OK	Putative H/ACA ribonucleoprotein complex subunit 1-like protein 1	na	NLAL1_ARATH	Q8VZT0	Q8LG22; Q9S715	OrderedLocusNames=At3g03920	na	Arabidopsis thaliana (Mouse-ear cress)	3702
High	Master Protein	GLYMA_03G164500	K11130 - H/ACA ribonucleoprotein complex subunit 3 (NOP10, NOLA3) (1 of 2)	0	153.603	89	7	62	4	64	7.5	9.85	249.36	7	3	0.717	0.813645	29.62	118.2	81.8	29.33	18.02	High	High	High	High	High	High	1		3	3	Present Both	1	GLYMA_03G164500	GLYMA_03G164500	sp|Q93XX8|NOP10_ARATH	H/ACA ribonucleoprotein complex subunit 3-like protein GN=NUP205	ident:52/64 pos:58/64 query:64 hit:64 align:64 bit:111.3	OK	H/ACA ribonucleoprotein complex subunit 3-like protein	Nucleolar protein 10	NOP10_ARATH	Q93XX8	Q9SIM0	OrderedLocusNames=At2g20490	na	Arabidopsis thaliana (Mouse-ear cress)	3702
High	Master Protein	GLYMA_19G165900	K11130 - H/ACA ribonucleoprotein complex subunit 3 (NOP10, NOLA3) (1 of 2)	0	82.745	33	5	35	2	120	13.8	9.52	129.46	5	0	0.666	0.768499	24.13	129.1	70.9	56.75	85.22	High	High	High	High	High	Peak Found	1		3	3	Present Both	1	GLYMA_19G165900	GLYMA_19G165900	sp|Q93XX8|NOP10_ARATH	H/ACA ribonucleoprotein complex subunit 3-like protein GN=NUP205	ident:52/120 pos:58/120 query:120 hit:64 align:64 bit:110.2	Poor_match	H/ACA ribonucleoprotein complex subunit 3-like protein	Nucleolar protein 10	NOP10_ARATH	Q93XX8	Q9SIM0	OrderedLocusNames=At2g20490	na	Arabidopsis thaliana (Mouse-ear cress)	3702
High	Master Protein	GLYMA_01G022100	K11251 - histone H2A (H2A) (1 of 24)	0	222.124	36	7	67	3	135	14	10.05	311.79	7	1	1.112	0.972386	62.48	112.5	87.5	9.51	60.92	High	High	High	High	High	High	1		3	3	Present Both	1	GLYMA_01G022100	GLYMA_01G022100	sp|Q9LD28|H2A6_ARATH	Histone H2A.6 GN=RAT5	ident:122/135 pos:122/135 query:135 hit:130 align:125 bit:241.9	OK	Histone H2A.6	HTA1; Protein RESISTANT TO AGROBACTERIUM TRANSFORMATION 5	H2A6_ARATH	Q9LD28	na	RAT5	H2A-1	Arabidopsis thaliana (Mouse-ear cress)	3702
High	Master Protein	GLYMA_13G334300	K11251 - histone H2A (H2A) (1 of 24)	0	169.935	60	10	63	1	149	15.7	10.67	275.06	10	0	0.655	0.752862	87.17	127.4	72.6	42.34	128.38	High	High	High	High	Peak Found	Not Found	1	Acetyl [N-Term]	3	2	Present Both	1	GLYMA_13G334300	GLYMA_13G334300	sp|Q9LZ46|H2A4_ARATH	Probable histone H2A.4 GN=EZA1	ident:133/149 pos:143/149 query:149 hit:153 align:153 bit:242.3	OK	Probable histone H2A.4	HTA12	H2A4_ARATH	Q9LZ46	na	OrderedLocusNames=At5g02560	na	Arabidopsis thaliana (Mouse-ear cress)	3702
High	Master Protein	GLYMA_06G071500	K11251 - histone H2A (H2A) (1 of 24)	0	122.836	53	9	39	8	136	14.4	10.32	133.09	9	0	1.315	0.880798	37.32	91.8	108.2	13.54	26.24	High	High	High	High	High	High	1		3	3	Present Both	1	GLYMA_06G071500	GLYMA_06G071500	sp|Q9C944|H2AV3_ARATH	Probable histone H2A variant 3 GN=FAB1C	ident:120/136 pos:129/136 query:136 hit:134 align:136 bit:222.2	OK	Probable histone H2A variant 3	H2A.F/Z 3; HTA9	H2AV3_ARATH	Q9C944	na	OrderedLocusNames=At1g52740	na	Arabidopsis thaliana (Mouse-ear cress)	3702
High	Master Protein	GLYMA_19G239200	K11251 - histone H2A (H2A) (1 of 24)	0	106.174	44	8	47	5	140	14.7	10.36	143.73	8	2	1.17	0.952604	56.66	71.5	128.5	36.47	48.26	High	High	High	High	High	High	1		3	3	Present Both	1	GLYMA_19G239200	GLYMA_19G239200	sp|Q9S9K7|H2AXB_ARATH	Probable histone H2AXb GN=EZA1	ident:132/140 pos:134/140 query:140 hit:142 align:142 bit:256.9	OK	Probable histone H2AXb	HTA3	H2AXB_ARATH	Q9S9K7	na	OrderedLocusNames=At1g54690	na	Arabidopsis thaliana (Mouse-ear cress)	3702
High	Master Protein	GLYMA_03G148100	K11251 - histone H2A (H2A) (1 of 24)	0	76.636	54	7	36	3	144	15.3	10.29	110.63	7	0	0.673	0.799527	34	124.6	75.4	28.96	42.53	High	Peak Found	High	High	High	Not Found	1		3	2	Present Both	1	GLYMA_03G148100	GLYMA_03G148100	sp|O04848|H2AXA_ARATH	Probable histone H2AXa GN=EXT1	ident:120/144 pos:131/144 query:144 hit:142 align:142 bit:240.7	OK	Probable histone H2AXa	HTA5	H2AXA_ARATH	O04848	Q8LAC0	OrderedLocusNames=At1g08880	na	Arabidopsis thaliana (Mouse-ear cress)	3702
High	Master Protein	GLYMA_12G065100	K11252 - histone H2B (H2B) (1 of 16)	0	206.51	62	13	90	2	149	16.3	10.08	311.28	13	12	1.24	0.918392	57.68	88.2	111.8	29.64	20.65	High	High	High	High	High	Not Found	1		3	2	Present Both	1	GLYMA_12G065100	GLYMA_12G065100	sp|O23629|H2B6_ARATH	Histone H2B.6 GN=H2B	ident:132/149 pos:138/149 query:149 hit:150 align:152 bit:238.8	OK	Histone H2B.6	H2BAt; HTB9	H2B6_ARATH	O23629	na	H2B	na	Arabidopsis thaliana (Mouse-ear cress)	3702
High	Master Protein	GLYMA_13G132100	K11252 - histone H2B (H2B) (1 of 16)	0	148.234	65	12	77	1	139	15.4	10.08	239	12	0	1.008	0.976913	35.8	100.4	99.6	25.76	33.7	High	High	High	High	High	Not Found	1		3	2	Present Both	1	GLYMA_13G132100	GLYMA_13G132100	sp|Q9ZUS0|H2B4_ARATH	Histone H2B.4 GN=F6'H2	ident:126/139 pos:132/139 query:139 hit:138 align:139 bit:228.4	OK	Histone H2B.4	HTB5	H2B4_ARATH	Q9ZUS0	na	OrderedLocusNames=At2g37470	na	Arabidopsis thaliana (Mouse-ear cress)	3702
High	Master Protein	GLYMA_11G130900	K11253 - histone H3 (H3) (1 of 22)	0	31.826	24	5	25	5	136	15.3	11.3	58.36	5	0	1.204	0.942237	70.67	83.4	116.6	15.56	44.76	High	High	High	High	High	High	1		3	3	Present Both	1	GLYMA_11G130900	GLYMA_11G130900	sp|P59226|H32_ARATH	Histone H3.2 GN=HTR1	ident:135/136 pos:136/136 query:136 hit:136 align:136 bit:271.6	OK	Histone H3.2	Histone H3.1	H32_ARATH	P59226	na	HTR2	na	Arabidopsis thaliana (Mouse-ear cress)	3702
High	Master Protein	GLYMA_19G172500	K11254 - histone H4 (H4) (1 of 20)	0	287.694	48	20	131	20	156	17.9	11.36	436.65	20	0	1.172	0.952604	79.04	84.3	115.7	17.93	41.61	High	High	High	High	High	High	1		3	3	Present Both	1	GLYMA_19G172500	GLYMA_19G172500	sp|P59259|H4_ARATH	Histone H4 GN=GXM1	ident:103/156 pos:103/156 query:156 hit:103 align:103 bit:203.4	OK	Histone H4	na	H4_ARATH	P59259	P02308	OrderedLocusNames=At1g07660	na	Arabidopsis thaliana (Mouse-ear cress)	3702
High	Master Protein	GLYMA_20G225900	K11275 - histone H1/5 (H1_5) (1 of 6)	0	69.912	12	2	10	2	190	19.8	10.92	55.65	2	0	0.914	0.952604	29.04	99.9	100.1	45.68		High	High	Peak Found	High	Not Found	Not Found	1		3	1	Only Control	1	GLYMA_20G225900	GLYMA_20G225900	sp|P26569|H12_ARATH	Histone H1.2 GN=GPT2	ident:70/190 pos:83/190 query:190 hit:273 align:133 bit:110.5	Partial_match_hit	Histone H1.2	na	H12_ARATH	P26569	na	OrderedLocusNames=At2g30620	na	Arabidopsis thaliana (Mouse-ear cress)	3702
High	Master Protein	GLYMA_13G145200	K11294 - nucleolin (NCL, NSR1) (1 of 11)	0	321.079	63	22	79	18	279	29.9	6.61	332.52	22	4	0.461	0.468153	15.62	133.5	66.5	33.19	36.79	High	High	High	High	High	Not Found	1		3	2	Present Both	1	GLYMA_13G145200	GLYMA_13G145200	sp|Q9ZUU4|CP29B_ARATH	RNA-binding protein CP29B, chloroplastic GN=CP29B	ident:156/279 pos:180/279 query:279 hit:289 align:241 bit:272.7	OK	RNA-binding protein CP29B, chloroplastic	Ribonucleoprotein At2g37220	CP29B_ARATH	Q9ZUU4	Q7GA50; Q8L941	CP29B	na	Arabidopsis thaliana (Mouse-ear cress)	3702
High	Master Protein	GLYMA_10G058500	K11294 - nucleolin (NCL, NSR1) (1 of 11)	0	144.538	51	14	41	10	275	29.4	5.5	169.44	14	0	0.443	0.426951	14.07	157.7	42.3	12.61	94.39	High	High	High	High	High	Peak Found	1	Phospho [S241; S248; S252]	3	3	Present Both	1	GLYMA_10G058500	GLYMA_10G058500	sp|Q9ZUU4|CP29B_ARATH	RNA-binding protein CP29B, chloroplastic GN=CP29B	ident:156/275 pos:187/275 query:275 hit:289 align:258 bit:275.8	OK	RNA-binding protein CP29B, chloroplastic	Ribonucleoprotein At2g37220	CP29B_ARATH	Q9ZUU4	Q7GA50; Q8L941	CP29B	na	Arabidopsis thaliana (Mouse-ear cress)	3702
High	Master Protein	GLYMA_12G027400	K11294 - nucleolin (NCL, NSR1) (1 of 11)	0	124.474	18	12	49	5	744	77.5	5.49	182.91	12	6	0.683	0.792914	23.18	122.7	77.3	24.78	20.07	High	High	High	High	High	High	1		3	3	Present Both	1	GLYMA_12G027400	GLYMA_12G027400	sp|Q1PEP5|NUCL2_ARATH	Nucleolin 2 GN=NUCL2	ident:143/744 pos:190/744 query:744 hit:636 align:312 bit:252.3	Partial_match_both	Nucleolin 2	Protein NUCLEOLIN LIKE 2 (AtNUC-L2); Protein PARALLEL LIKE 1 (AtPARLL1)	NUCL2_ARATH	Q1PEP5	Q9LIH8	NUCL2	PARLL1	Arabidopsis thaliana (Mouse-ear cress)	3702
High	Master Protein	GLYMA_11G101500	K11294 - nucleolin (NCL, NSR1) (1 of 11)	0	117.541	21	11	43	4	748	78.3	5.58	167.16	11	0	1.042	0.99785	100.43	103.3	96.7	57.74	35.64	High	High	High	High	High	High	1		3	3	Present Both	1	GLYMA_11G101500	GLYMA_11G101500	sp|Q1PEP5|NUCL2_ARATH	Nucleolin 2 GN=NUCL2	ident:143/748 pos:189/748 query:748 hit:636 align:307 bit:256.5	Partial_match_both	Nucleolin 2	Protein NUCLEOLIN LIKE 2 (AtNUC-L2); Protein PARALLEL LIKE 1 (AtPARLL1)	NUCL2_ARATH	Q1PEP5	Q9LIH8	NUCL2	PARLL1	Arabidopsis thaliana (Mouse-ear cress)	3702
High	Master Protein	GLYMA_05G043200	K11294 - nucleolin (NCL, NSR1) (1 of 11)	0	38.325	29	6	10	6	299	32.9	4.93	36.9	6	0	1.775	0.690173	80.86	73.5	126.5	67.29	6.61	High	High	High	High	High	Not Found	1		3	2	Present Both	1	GLYMA_05G043200	GLYMA_05G043200	sp|Q9FGS0|CP31B_ARATH	RNA-binding protein CP31B, chloroplastic GN=CP31B	ident:167/299 pos:220/299 query:299 hit:289 align:303 bit:310.5	OK	RNA-binding protein CP31B, chloroplastic	na	CP31B_ARATH	Q9FGS0	na	CP31B	na	Arabidopsis thaliana (Mouse-ear cress)	3702
High	Master Protein	GLYMA_06G175400	K11294 - nucleolin (NCL, NSR1) (1 of 11)	0	22.701	11	3	7	3	290	32	4.83	24.59	3	0	0.354	0.381391	7.86	125.7	74.3	55.02	66.74	High	High	High	High	High	Not Found	1		3	2	Present Both	1	GLYMA_06G175400	GLYMA_06G175400	sp|Q04836|CP31A_ARATH	31 kDa ribonucleoprotein, chloroplastic GN=CP31A	ident:180/290 pos:212/290 query:290 hit:329 align:274 bit:338.6	OK	31 kDa ribonucleoprotein, chloroplastic	RNA-binding protein 1/2/3 (AtRBP33); RNA-binding protein CP31A; RNA-binding protein RNP-T; RNA-binding protein cp31	CP31A_ARATH	Q04836	P92871; Q03394; Q43350; Q94EH5	CP31A	na	Arabidopsis thaliana (Mouse-ear cress)	3702
High	Master Protein	GLYMA_08G335300	K11338 - RuvB-like protein 2 [EC:3.6.4.12] (RUVBL2, RVB2, INO80J) (1 of 2)	0	15.092	5	2	4	2	465	51	5.47	11.07	2	0	1.407	0.879779	159.21	65.6	134.4	40.07	133.91	High	Peak Found	Peak Found	Peak Found	High	High	1		3	3	Present Both	1	GLYMA_08G335300	GLYMA_08G335300	sp|Q9FMR9|RIN1_ARATH	RuvB-like protein 1 GN=RIN1	ident:201/465 pos:301/465 query:465 hit:458 align:459 bit:373.6	Poor_match	RuvB-like protein 1	49 kDa TATA box-binding protein-interacting protein homolog (AtTIP49a); Ruv DNA-helicase-like protein	RIN1_ARATH	Q9FMR9	na	RIN1	RVB1; TIP49a	Arabidopsis thaliana (Mouse-ear cress)	3702
High	Master Protein	GLYMA_11G011200	K11352 - NADH dehydrogenase (ubiquinone) 1 alpha subcomplex subunit 12 (NDUFA12) (1 of 2)	0	177.813	85	15	74	6	158	18.3	8.84	228.6	15	9	1.163	0.952604	55.38	88.4	111.6	2.29	6.84	High	High	High	High	High	High	1		3	3	Present Both	1	GLYMA_11G011200	GLYMA_11G011200	sp|Q9M9M9|NDUAC_ARATH	Probable NADH dehydrogenase [ubiquinone] 1 alpha subcomplex subunit 12 GN=CBP20	ident:122/158 pos:138/158 query:158 hit:159 align:150 bit:273.5	OK	Probable NADH dehydrogenase [ubiquinone] 1 alpha subcomplex subunit 12	na	NDUAC_ARATH	Q9M9M9	na	OrderedLocusNames=At3g03100	na	Arabidopsis thaliana (Mouse-ear cress)	3702
High	Master Protein	GLYMA_01G228400	K11352 - NADH dehydrogenase (ubiquinone) 1 alpha subcomplex subunit 12 (NDUFA12) (1 of 2)	0	104.038	67	10	37	1	156	18.1	9.03	98.8	10	0	0.748	0.862164	0	114.4	85.6			High	Not Found	Not Found	Not Found	Peak Found	Not Found	1		1	1	Missing Both	1	GLYMA_01G228400	GLYMA_01G228400	sp|Q9M9M9|NDUAC_ARATH	Probable NADH dehydrogenase [ubiquinone] 1 alpha subcomplex subunit 12 GN=CBP20	ident:122/156 pos:138/156 query:156 hit:159 align:150 bit:274.2	OK	Probable NADH dehydrogenase [ubiquinone] 1 alpha subcomplex subunit 12	na	NDUAC_ARATH	Q9M9M9	na	OrderedLocusNames=At3g03100	na	Arabidopsis thaliana (Mouse-ear cress)	3702
High	Master Protein	GLYMA_10G128100	K11353 - NADH dehydrogenase (ubiquinone) 1 alpha subcomplex subunit 13 (NDUFA13) (1 of 1)	0	209.973	55	11	50	11	143	16.2	9.52	179.69	11	0	1.393	0.854734	76.38	94.7	105.3	41.77	80.61	High	High	High	High	High	High	1		3	3	Present Both	1	GLYMA_10G128100	GLYMA_10G128100	sp|O49313|NDADB_ARATH	NADH dehydrogenase [ubiquinone] 1 alpha subcomplex subunit 13-B GN=NDA2	ident:124/143 pos:135/143 query:143 hit:143 align:143 bit:261.9	OK	NADH dehydrogenase [ubiquinone] 1 alpha subcomplex subunit 13-B	na	NDADB_ARATH	O49313	na	OrderedLocusNames=At2g33220	na	Arabidopsis thaliana (Mouse-ear cress)	3702
High	Master Protein	GLYMA_08G048100	K11518 - mitochondrial import receptor subunit TOM40 (TOM40) (1 of 2)	0	16.634	8	2	6	2	310	34.6	7.81	23.19	2	0	1.052	0.992627	27.83	103.9	96.1	24.51	22.07	High	High	Peak Found	High	High	High	1		3	3	Present Both	1	GLYMA_08G048100	GLYMA_08G048100	sp|Q9LHE5|TO401_ARATH	Mitochondrial import receptor subunit TOM40-1 GN=TOM40-1	ident:223/310 pos:258/310 query:310 hit:309 align:310 bit:473.4	OK	Mitochondrial import receptor subunit TOM40-1, N-terminally processed	Translocase of outer membrane 40 kDa subunit homolog 1	TO401_ARATH	Q9LHE5	na	TOM40-1	na	Arabidopsis thaliana (Mouse-ear cress)	3702
High	Master Protein	GLYMA_08G113000	K11594 - ATP-dependent RNA helicase DDX3X (DDX3X, bel) (1 of 8)	0	38.442	6	2	5	2	619	66.7	7.87	20.62	2	0	0.01	6.62973e-17		200		8.73		High	High	Not Found	High	Not Found	High	1		2	2	Present Both	1	GLYMA_08G113000	GLYMA_08G113000	sp|Q84W89|RH37_ARATH	DEAD-box ATP-dependent RNA helicase 37 GN=RH37	ident:463/619 pos:504/619 query:619 hit:633 align:588 bit:882.9	OK	DEAD-box ATP-dependent RNA helicase 37	na	RH37_ARATH	Q84W89	Q9SIN6	RH37	na	Arabidopsis thaliana (Mouse-ear cress)	3702
High	Master Protein	GLYMA_15G259200	K12158 - ubiquitin-like protein Nedd8 (NEDD8) (1 of 3)	0	311.686	59	16	144	16	154	17.2	6.06	514.57	16	0	1.052	0.992627	71.81	92.9	107.1	12.77	108.01	High	High	High	High	High	High	1		3	3	Present Both	1	GLYMA_15G259200	GLYMA_15G259200	sp|Q9M1P9|RUB1_ARATH	Ubiquitin-NEDD8-like protein RUB1 GN=RUB1	ident:151/154 pos:152/154 query:154 hit:156 align:152 bit:299.7	OK	NEDD8-like protein RUB1	Ubiquitin-related protein 1 (AtRUB1)	RUB1_ARATH	Q9SHE7	O80715; P59263; Q0WQU3; Q38875; Q9LDJ2; Q9LYW1; Q9M0W3; Q9M1P9; Q9S7X3	RUB1	NEDD8; UBQ15	Arabidopsis thaliana (Mouse-ear cress)	3702
High	Master Protein	GLYMA_14G163800	K12162 - ubiquitin-fold modifier 1 (UFM1) (1 of 3)	0	8.297	16	1	4	1	94	10.2	9.19	11.2	1	0	0.966	0.960306	64.64	101.7	98.3	5.54	52.77	High	High	Not Found	High	Peak Found	High	1		2	3	Present Both	1	GLYMA_14G163800	GLYMA_14G163800	sp|Q9CA23|UFM1_ARATH	Ubiquitin-fold modifier 1 GN=UGE3	ident:84/94 pos:86/94 query:94 hit:93 align:87 bit:171.8	OK	Ubiquitin-fold modifier 1	na	UFM1_ARATH	Q9CA23	na	OrderedLocusNames=At1g77710	na	Arabidopsis thaliana (Mouse-ear cress)	3702
High	Master Protein	GLYMA_13G352200	K12197 - charged multivesicular body protein 1 (CHMP1, VPS46, DID2) (1 of 2)	0	14.053	18	4	4	4	203	22.6	7.2	9.29	4	0	1.217	0.935988	66.61	80	120	70.3	54.73	High	Peak Found	Peak Found	High	High	High	1		3	3	Present Both	1	GLYMA_13G352200	GLYMA_13G352200	sp|Q8LE58|CHM1A_ARATH	ESCRT-related protein CHMP1A GN=CHMP1A	ident:183/203 pos:195/203 query:203 hit:203 align:203 bit:380.6	OK	ESCRT-related protein CHMP1A	Protein CHARGED MULTIVESICULAR BODY PROTEIN 1A; Protein CHROMATIN MODIFYING PROTEIN 1A; Vacuolar protein-sorting-associated protein 46.1	CHM1A_ARATH	Q8LE58	Q9FZ60	CHMP1A	na	Arabidopsis thaliana (Mouse-ear cress)	3702
High	Master Protein	GLYMA_20G240000	K12373 - hexosaminidase (HEXA_B) (1 of 6)	0	3.135	2	1	2	1	546	61.6	7.97	5.38	1	0	0.415	0.507476	4.97	141.3	58.7	27		High	High	Not Found	Peak Found	Not Found	Not Found	1		2	1	Only Control	1	GLYMA_20G240000	GLYMA_20G240000	sp|A7WM73|HEXO1_ARATH	Beta-hexosaminidase 1 GN=HEXO1	ident:375/546 pos:439/546 query:546 hit:541 align:541 bit:797.0	OK	Beta-hexosaminidase 1	Beta-GlcNAcase 1; Beta-N-acetylhexosaminidase 1; Beta-hexosaminidase 2 (AtHEX2); N-acetyl-beta-glucosaminidase 1	HEXO1_ARATH	A7WM73	Q0WUA8; Q8LFK0; Q9M3C5	HEXO1	HEX2	Arabidopsis thaliana (Mouse-ear cress)	3702
Medium	Master Protein	GLYMA_02G002000	K12502 - MPBQ/MSBQ methyltransferase (VTE3, APG1) (1 of 3)	0.015	1.519	2	1	2	1	343	38.8	9.5	4.46	1	0	0.49	0.617513	2.69	134.2	65.8	10.64		High	High	Not Found	Peak Found	Not Found	Not Found	1		2	1	Only Control	1	GLYMA_02G002000	GLYMA_02G002000	sp|Q9LY74|BQMT_ARATH	2-methyl-6-phytyl-1,4-hydroquinone methyltransferase, chloroplastic GN=VTE3	ident:266/343 pos:295/343 query:343 hit:338 align:348 bit:502.7	OK	2-methyl-6-phytyl-1,4-hydroquinone methyltransferase, chloroplastic	37 kDa inner envelope membrane protein (E37); MPBQ/MSBQ methyltransferase; Protein ALBINO OR PALE GREEN MUTANT 1; Protein INNER ENVELOPE PROTEIN 37; Protein VITAMIN E DEFECTIVE 3	BQMT_ARATH	Q9LY74	Q1EC48; Q8LDQ3; Q94IE2	VTE3	APG1; IE37	Arabidopsis thaliana (Mouse-ear cress)	3702
High	Master Protein	GLYMA_07G072700	K12614 - ATP-dependent RNA helicase DDX6/DHH1 (DDX6, RCK, DHH1) (1 of 5)	0	30.36	5	3	4	3	503	57.7	8.4	12.35	3	0	100	6.62973e-17			200			High	High	Not Found	Not Found	Not Found	High	1		2	1	Only Control	1	GLYMA_07G072700	GLYMA_07G072700	sp|Q8RXK6|RH8_ARATH	DEAD-box ATP-dependent RNA helicase 8 GN=RH8	ident:431/503 pos:451/503 query:503 hit:505 align:515 bit:854.7	OK	DEAD-box ATP-dependent RNA helicase 8	na	RH8_ARATH	Q8RXK6	O65275; Q9ZS12	RH8	na	Arabidopsis thaliana (Mouse-ear cress)	3702
High	Master Protein	GLYMA_02G082300	K12622 - U6 snRNA-associated Sm-like protein LSm3 (LSM3) (1 of 2)	0	4.201	21	2	12	2	97	11.2	4.88	17.76	2	0	1.519	0.853047	52.99	73.4	126.6	9.82	58.73	High	High	High	High	High	High	1		3	3	Present Both	1	GLYMA_02G082300	GLYMA_02G082300	sp|Q9C6K5|LSM3B_ARATH	Sm-like protein LSM3B GN=LSM3B	ident:89/97 pos:93/97 query:97 hit:98 align:97 bit:179.1	OK	Sm-like protein LSM3B (AtLSM3B)	U6 snRNA-associated Sm-like protein LSM3B	LSM3B_ARATH	Q9C6K5	na	LSM3B	na	Arabidopsis thaliana (Mouse-ear cress)	3702
High	Master Protein	GLYMA_20G184400	K12736 - peptidylprolyl isomerase domain and WD repeat-containing protein 1 [EC:5.2.1.8] (PPWD1) (1 of 4)	0	15.461	14	2	4	2	292	33.2	8.32	13.45	2	0	1.258	0.992627	97.91	88.6	111.4	20.21	85.76	High	High	Not Found	High	Not Found	Peak Found	1		2	2	Present Both	1	GLYMA_20G184400	GLYMA_20G184400	sp|Q9C835|CP21D_ARATH	Peptidyl-prolyl cis-trans isomerase CYP21-4 GN=CYP21-4	ident:135/292 pos:166/292 query:292 hit:236 align:229 bit:261.2	Poor_match	Peptidyl-prolyl cis-trans isomerase CYP21-4 (PPIase CYP21-4)	Cyclophilin of 21 kDa 4; Cyclophilin-21-4	CP21D_ARATH	Q9C835	na	CYP21-4	na	Arabidopsis thaliana (Mouse-ear cress)	3702
High	Master Protein	GLYMA_17G078400	K12741 - heterogeneous nuclear ribonucleoprotein A1/A3 (HNRNPA1_3) (1 of 20)	0	22.291	11	1	3	1	275	28.1	5.31	11.84	1	0	1.026	0.972386	48.98	98.7	101.3	45.81	5.04	High	High	High	Peak Found	Peak Found	Not Found	1		3	2	Present Both	1	GLYMA_17G078400	GLYMA_17G078400	sp|Q9FNR1|RBG3_ARATH	Glycine-rich RNA-binding protein 3, mitochondrial GN=RBG3	ident:83/275 pos:105/275 query:275 hit:309 align:122 bit:181.0	Partial_match_both	Glycine-rich RNA-binding protein 3, mitochondrial (AtGR-RBP3)	AtRBG3; Mitochondrial RNA-binding protein 2a (At-mRBP2a); Organelle RRM domain-containing protein 3	RBG3_ARATH	Q9FNR1	na	RBG3	na	Arabidopsis thaliana (Mouse-ear cress)	3702
High	Master Protein	GLYMA_08G245200	K12741 - heterogeneous nuclear ribonucleoprotein A1/A3 (HNRNPA1_3) (1 of 20)	0	20.543	12	3	7	3	245	26.2	4.86	15.39	3	0	1.744	0.739769	100.61	72.9	127.1	88.97	46.66	High	High	High	High	High	Peak Found	1		3	3	Present Both	1	GLYMA_08G245200	GLYMA_08G245200	sp|Q9C909|RBG5_ARATH	Glycine-rich RNA-binding protein 5, mitochondrial GN=RBG5	ident:72/245 pos:97/245 query:245 hit:289 align:118 bit:153.7	Partial_match_both	Glycine-rich RNA-binding protein 5, mitochondrial (AtGR-RBP5)	AtRBG5; Mitochondrial RNA-binding protein 2b (At-mRBP2b); Organelle RRM domain-containing protein 4	RBG5_ARATH	Q9C909	na	RBG5	na	Arabidopsis thaliana (Mouse-ear cress)	3702
High	Master Protein	GLYMA_09G007700	K12825 - splicing factor 3A subunit 1 (SF3A1, SAP114) (1 of 3)	0	8.237	2	2	7	2	806	88.9	5.15	10.46	2	0	0.962	0.972386	80.57	93.4	106.6	13.48	51.76	High	High	High	Peak Found	High	High	1		3	3	Present Both	1	GLYMA_09G007700.3.p	GLYMA_09G007700.3.p	sp|Q8RXF1|SF3A1_ARATH	Probable splicing factor 3A subunit 1 GN=SF1	ident:561/806 pos:635/806 query:806 hit:785 align:815 bit:931.0	OK	Probable splicing factor 3A subunit 1	na	SF3A1_ARATH	Q8RXF1	Q0WWB5; Q9MA20	OrderedLocusNames=At1g14650	na	Arabidopsis thaliana (Mouse-ear cress)	3702
High	Master Protein	GLYMA_18G132700	K12832 - splicing factor 3B subunit 5 (SF3B5, SF3B10) (1 of 2)	0	27.795	52	2	5	2	87	10.1	5.36	17.41	2	0	0.566	0.671207	29.06	148.1	51.9	81.14	94.38	High	High	Peak Found	Peak Found	High	Not Found	1	Acetyl [N-Term]	3	2	Present Both	1	GLYMA_18G132700	GLYMA_18G132700	sp|P58728|SF3BB_ARATH	Uncharacterized protein At4g14342 GN=SETH6	ident:81/87 pos:86/87 query:87 hit:87 align:87 bit:176.4	OK	Uncharacterized protein At4g14342	na	SF3BB_ARATH	P58728	na	OrderedLocusNames=At4g14342	na	Arabidopsis thaliana (Mouse-ear cress)	3702
High	Master Protein	GLYMA_02G278800	K12833 - pre-mRNA branch site protein p14 (SF3B14) (1 of 2)	0	35.329	29	3	8	3	124	14.4	9.57	28.74	3	0	1.339	0.91329	42.96	93.9	106.1	15.95	130.72	High	High	Peak Found	High	Peak Found	High	1		3	3	Present Both	1	GLYMA_02G278800	GLYMA_02G278800	sp|Q9FMP4|SF3B6_ARATH	Splicing factor 3B subunit 6-like protein GN=SWEET9	ident:111/124 pos:115/124 query:124 hit:124 align:124 bit:233.0	OK	Splicing factor 3B subunit 6-like protein	Pre-mRNA branch site p14-like protein	SF3B6_ARATH	Q9FMP4	na	OrderedLocusNames=At5g12190	na	Arabidopsis thaliana (Mouse-ear cress)	3702
High	Master Protein	GLYMA_06G324000	K12837 - splicing factor U2AF 65 kDa subunit (U2AF2) (1 of 3)	0.003	2.216	1	1	3	1	605	68	7.52	6.53	1	0	0.438	0.556058	1.32	139.1	60.9	6.59		High	High	Not Found	High	Not Found	Not Found	1		2	1	Only Control	1	GLYMA_06G324000	GLYMA_06G324000	sp|O23212|U2A2A_ARATH	Splicing factor U2af large subunit A GN=U2AF65A	ident:394/605 pos:451/605 query:605 hit:573 align:570 bit:707.6	OK	Splicing factor U2af large subunit A	U2 auxiliary factor 65 kDa subunit A; U2 small nuclear ribonucleoprotein auxiliary factor large subunit A (U2 snRNP auxiliary factor large subunit A)	U2A2A_ARATH	O23212	Q3E9P9; Q8RXR7	U2AF65A	na	Arabidopsis thaliana (Mouse-ear cress)	3702
High	Master Protein	GLYMA_20G024100	K12840 - splicing factor 45 (RBM17, SPF45) (1 of 2)	0	14.559	6	2	6	2	392	43.1	5.95	11.62	2	0	0.433	0.461756	11.44	156.4	43.6	43.21	76.17	High	High	Peak Found	Peak Found	High	Not Found	1		3	2	Present Both	1	GLYMA_20G024100	GLYMA_20G024100	sp|P42698|DR111_ARATH	DNA-damage-repair/toleration protein DRT111, chloroplastic GN=DRT111	ident:288/392 pos:325/392 query:392 hit:387 align:405 bit:497.7	OK	DNA-damage-repair/toleration protein DRT111, chloroplastic	REQUIRED FOR SNC4-1D protein 2	DR111_ARATH	P42698	Q9S9Q1	DRT111	na	Arabidopsis thaliana (Mouse-ear cress)	3702
High	Master Protein	GLYMA_14G196700	K12845 - U4/U6 small nuclear ribonucleoprotein SNU13 (SNU13, NHP2L) (1 of 4)	0	163.007	63	7	51	2	128	13.8	7.12	214.06	7	0	0.775	0.859574	26.51	117	83	50.74	107.89	High	High	High	High	High	High	1		3	3	Present Both	1	GLYMA_14G196700	GLYMA_14G196700	sp|Q9LEY9|NHP2_ARATH	H/ACA ribonucleoprotein complex subunit 2-like protein GN=NHL6	ident:48/128 pos:73/128 query:128 hit:156 align:131 bit:88.6	Poor_match	H/ACA ribonucleoprotein complex subunit 2-like protein	Nhp2-like protein	NHP2_ARATH	Q9LEY9	na	OrderedLocusNames=At5g08180	na	Arabidopsis thaliana (Mouse-ear cress)	3702
High	Master Protein	GLYMA_20G223300	K12860 - pre-mRNA-splicing factor CDC5/CEF1 (CDC5L, CDC5, CEF1) (1 of 2)	0	38.223	6	4	7	4	963	108.4	5.39	20.7	4	0	0.483	0.606369	22.74	106	94	30.51	92.31	High	High	Peak Found	Peak Found	High	High	1		3	3	Present Both	1	GLYMA_20G223300	GLYMA_20G223300	sp|P92948|CDC5L_ARATH	Cell division cycle 5-like protein GN=CDC5	ident:639/963 pos:721/963 query:963 hit:844 align:824 bit:1250.0	OK	Cell division cycle 5-like protein (Cdc5-like protein)	Atypical R2R3-MYB transcription factor CDC5; MOS4-associated complex protein 1 (MAC protein 1); Protein MYB DOMAIN CELL DIVISION CYCLE 5 (AtMYBCD5)	CDC5L_ARATH	P92948	B9DFT0; O04498; Q6R0C5	CDC5	MAC1; MYBCD5	Arabidopsis thaliana (Mouse-ear cress)	3702
High	Master Protein	GLYMA_18G019700	K12875 - apoptotic chromatin condensation inducer in the nucleus (ACIN1, ACINUS) (1 of 2)	0	75.622	12	5	19	3	708	78	4.74	98.63	5	1	0.511	0.555347	19.25	149.3	50.7	44.18	6.11	High	High	High	High	Peak Found	Not Found	1	Phospho [S657]	3	2	Present Both	1	GLYMA_18G019700	GLYMA_18G019700	sp|Q9SG79|SUN2_ARATH	SUN domain-containing protein 2 GN=SUN2	ident:17/708 pos:30/708 query:708 hit:455 align:51 bit:30.8	Partial_match_both	SUN domain-containing protein 2 (AtSUN2)	na	SUN2_ARATH	Q9SG79	Q8L9I5	SUN2	na	Arabidopsis thaliana (Mouse-ear cress)	3702
High	Master Protein	GLYMA_11G141500	K12881 - THO complex subunit 4 (THOC4, ALY) (1 of 5)	0	125.441	46	9	42	6	247	26.2	10.1	168.12	9	3	0.581	0.658359	16.47	115.8	84.2	40.01	30.52	High	High	High	High	High	High	1		3	3	Present Both	1	GLYMA_11G141500	GLYMA_11G141500	sp|Q8L773|THO4A_ARATH	THO complex subunit 4A GN=ALY1	ident:146/247 pos:179/247 query:247 hit:244 align:250 bit:232.6	OK	THO complex subunit 4A	ALYREF homolog 1 (AtALY1)	THO4A_ARATH	Q8L773	Q8LCA6; Q9FJE1	ALY1	THO4A	Arabidopsis thaliana (Mouse-ear cress)	3702
High	Master Protein	GLYMA_13G334200	K12881 - THO complex subunit 4 (THOC4, ALY) (1 of 5)	0	101.497	42	6	26	3	243	25.9	10.14	103.89	6	0	0.348	0.280262	2.68	148.3	51.7	8.9	22.2	High	High	Not Found	High	Peak Found	Not Found	1		2	2	Present Both	1	GLYMA_13G334200	GLYMA_13G334200	sp|Q8L773|THO4A_ARATH	THO complex subunit 4A GN=ALY1	ident:138/243 pos:169/243 query:243 hit:244 align:257 bit:229.2	OK	THO complex subunit 4A	ALYREF homolog 1 (AtALY1)	THO4A_ARATH	Q8L773	Q8LCA6; Q9FJE1	ALY1	THO4A	Arabidopsis thaliana (Mouse-ear cress)	3702
High	Master Protein	GLYMA_05G117600	K12891 - splicing factor, arginine/serine-rich 2 (SFRS2) (1 of 2)	0	11.144	9	2	3	2	267	31.2	11.4	8.18	2	0	1.066	0.992627	39.21	102	98	24.07	11.15	High	Peak Found	Not Found	High	Not Found	Peak Found	1		2	2	Present Both	1	GLYMA_05G117600	GLYMA_05G117600	sp|Q9FMG4|SC35_ARATH	Serine/arginine-rich splicing factor SC35 GN=SC35	ident:183/267 pos:206/267 query:267 hit:303 align:304 bit:236.5	OK	Serine/arginine-rich splicing factor SC35 (At-SC35; AtSC35)	SC35-like splicing factor	SC35_ARATH	Q9FMG4	na	SC35	na	Arabidopsis thaliana (Mouse-ear cress)	3702
High	Master Protein	GLYMA_14G136700	K12896 - splicing factor, arginine/serine-rich 7 (SFRS7) (1 of 8)	0	22.242	22	4	10	4	178	20.4	11.36	17.96	4	0	0.516	0.561352	17.89	143.6	56.4	82.71	85.61	High	High	Peak Found	High	Peak Found	High	1		3	3	Present Both	1	GLYMA_14G136700	GLYMA_14G136700	sp|O81126|RSZ22_ARATH	Serine/arginine-rich splicing factor RSZ22 GN=RSZ22	ident:137/178 pos:146/178 query:178 hit:200 align:200 bit:210.3	OK	Serine/arginine-rich splicing factor RSZ22	RS-containing zinc finger protein 22 (At-RSZ22; At-RSZp22; AtRSZ22)	RSZ22_ARATH	O81126	O23646	RSZ22	RSZP22; SRZ22	Arabidopsis thaliana (Mouse-ear cress)	3702
High	Master Protein	GLYMA_09G052500	K13025 - ATP-dependent RNA helicase (EIF4A3, FAL1) (1 of 2)	0	9.374	4	1	2	1	407	46	6.24	5.81	1	0	1.41	0.900811	149.5	83	117	10.5	104.05	High	Peak Found	Not Found	Peak Found	Not Found	High	1		2	2	Present Both	1	GLYMA_09G052500	GLYMA_09G052500	sp|Q94A52|RH2_ARATH	Eukaryotic initiation factor 4A-III homolog GN=EIF4A3	ident:343/407 pos:371/407 query:407 hit:408 align:384 bit:729.2	OK	Eukaryotic initiation factor 4A-III homolog (AteIF4AIII; eIF-4A-III; eIF4A-III)	DEAD-box ATP-dependent RNA helicase 2 (AtRH02)	RH2_ARATH	Q94A52	Q9ZS14	EIF4A3	na	Arabidopsis thaliana (Mouse-ear cress)	3702
High	Master Protein	GLYMA_17G200600	K13172 - serine/arginine repetitive matrix protein 2 (SRRM2, SRM300) (1 of 2)	0	21.147	6	3	4	3	785	91.3	7.59	12.15	3	0	1.224	0.952604	31.51	58.2	141.8	117.58	29.4	High	High	Not Found	Peak Found	Not Found	High	1		2	2	Present Both	1	GLYMA_17G200600	GLYMA_17G200600	sp|Q9FKE6|CCT15_ARATH	Cyclin-T1-5 GN=CYCT1-5	ident:49/785 pos:76/785 query:785 hit:579 align:171 bit:31.6	Partial_match_both	Cyclin-T1-5 (CycT1;5)	Protein AtCycT-like1	CCT15_ARATH	Q9FKE6	na	CYCT1-5	na	Arabidopsis thaliana (Mouse-ear cress)	3702
High	Master Protein	GLYMA_18G251400	K13199 - plasminogen activator inhibitor 1 RNA-binding protein (SERBP1) (1 of 5)	0	93.572	41	11	24	6	370	39.9	6.3	80.91	11	4	0.911	0.950575	67.83	94.1	105.9	18.71	76.38	High	High	Peak Found	High	Peak Found	High	1		3	3	Present Both	1	GLYMA_18G251400	GLYMA_18G251400	sp|O23593|RGGB_ARATH	RGG repeats nuclear RNA binding protein B GN=RGGB	ident:191/370 pos:235/370 query:370 hit:360 align:385 bit:280.0	OK	RGG repeats nuclear RNA binding protein B	na	RGGB_ARATH	O23593	Q8LB56	RGGB	na	Arabidopsis thaliana (Mouse-ear cress)	3702
High	Master Protein	GLYMA_03G110300	K13199 - plasminogen activator inhibitor 1 RNA-binding protein (SERBP1) (1 of 5)	0	89.689	22	5	23	2	368	39.1	6.02	86.58	5	3	1.008	0.992621	46.92	98.3	101.7	23.85	73.47	High	High	High	High	High	High	1		3	3	Present Both	1	GLYMA_03G110300	GLYMA_03G110300	sp|O23593|RGGB_ARATH	RGG repeats nuclear RNA binding protein B GN=RGGB	ident:189/368 pos:232/368 query:368 hit:360 align:389 bit:271.9	OK	RGG repeats nuclear RNA binding protein B	na	RGGB_ARATH	O23593	Q8LB56	RGGB	na	Arabidopsis thaliana (Mouse-ear cress)	3702
High	Master Protein	GLYMA_07G114600	K13199 - plasminogen activator inhibitor 1 RNA-binding protein (SERBP1) (1 of 5)	0	89.174	22	5	26	2	368	39.3	6.19	111.68	5	0	1.657	0.799254	91.54	75.3	124.7	13.83	101.87	High	High	High	High	High	High	1		3	3	Present Both	1	GLYMA_07G114600	GLYMA_07G114600	sp|O23593|RGGB_ARATH	RGG repeats nuclear RNA binding protein B GN=RGGB	ident:186/368 pos:228/368 query:368 hit:360 align:391 bit:269.6	OK	RGG repeats nuclear RNA binding protein B	na	RGGB_ARATH	O23593	Q8LB56	RGGB	na	Arabidopsis thaliana (Mouse-ear cress)	3702
High	Master Protein	GLYMA_09G243200	K13199 - plasminogen activator inhibitor 1 RNA-binding protein (SERBP1) (1 of 5)	0	77.348	34	8	20	3	367	39.4	6.19	68.76	8	0	6.798	0.0121117	118.79	41.6	158.4	85.4	95.65	High	High	Peak Found	High	Not Found	High	1		3	2	Present Both	1	GLYMA_09G243200	GLYMA_09G243200	sp|O23593|RGGB_ARATH	RGG repeats nuclear RNA binding protein B GN=RGGB	ident:192/367 pos:241/367 query:367 hit:360 align:385 bit:272.3	OK	RGG repeats nuclear RNA binding protein B	na	RGGB_ARATH	O23593	Q8LB56	RGGB	na	Arabidopsis thaliana (Mouse-ear cress)	3702
High	Master Protein	GLYMA_12G024500	K13249 - translocon-associated protein subunit alpha (SSR1) (1 of 2)	0	22.997	15	2	6	1	258	27.8	5	15.99	2	0	0.01	6.62973e-17		200		24.58		High	Peak Found	Not Found	Not Found	Not Found	Not Found	1		2	0	Only Control	1	GLYMA_12G024500	GLYMA_12G024500	sp|P45434|SSRA_ARATH	Translocon-associated protein subunit alpha GN=SSL11	ident:141/258 pos:183/258 query:258 hit:258 align:240 bit:250.8	OK	Translocon-associated protein subunit alpha (TRAP-alpha)	Signal sequence receptor subunit alpha (SSR-alpha)	SSRA_ARATH	P45434	Q94A59; Q9SKP7	OrderedLocusNames=At2g21160	na	Arabidopsis thaliana (Mouse-ear cress)	3702
High	Master Protein	GLYMA_11G098300	K13249 - translocon-associated protein subunit alpha (SSR1) (1 of 2)	0	20.853	15	2	7	1	258	27.7	4.91	17.64	2	1	0.417	0.364394	6.78	143.3	56.7	23.52	53.71	High	Not Found	Peak Found	Peak Found	Not Found	High	1		2	2	Present Both	1	GLYMA_11G098300	GLYMA_11G098300	sp|P45434|SSRA_ARATH	Translocon-associated protein subunit alpha GN=SSL11	ident:143/258 pos:184/258 query:258 hit:258 align:240 bit:253.8	OK	Translocon-associated protein subunit alpha (TRAP-alpha)	Signal sequence receptor subunit alpha (SSR-alpha)	SSRA_ARATH	P45434	Q94A59; Q9SKP7	OrderedLocusNames=At2g21160	na	Arabidopsis thaliana (Mouse-ear cress)	3702
High	Master Protein	GLYMA_16G050800	K13250 - translocon-associated protein subunit beta (SSR2) (1 of 2)	0	55.686	28	5	18	5	194	20.9	9.36	54.09	5	0	1.679	0.735127	91.22	66.6	133.4	6.29	78.55	High	High	High	High	High	High	1		3	3	Present Both	1	GLYMA_16G050800	GLYMA_16G050800	sp|P46573|PBL10_ARATH	Probable serine/threonine-protein kinase PBL10 GN=PBL10	ident:19/194 pos:26/194 query:194 hit:412 align:48 bit:28.5	Partial_match_both	Probable serine/threonine-protein kinase PBL10	PBS1-like protein 10; Protein kinase 1B	PBL10_ARATH	P46573	Q7GAG3; Q9SLH5	PBL10	na	Arabidopsis thaliana (Mouse-ear cress)	3702
High	Master Protein	GLYMA_13G328300	K13984 - thioredoxin domain-containing protein 5 (TXNDC5, ERP46) (1 of 2)	0	45.882	39	7	19	7	147	16.8	5.25	40.81	7	0	1.828	0.670218	71.36	88.7	111.3	1.94	101.15	High	High	High	High	High	Peak Found	1		3	3	Present Both	1	GLYMA_13G328300	GLYMA_13G328300	sp|Q8GYD1|PDI51_ARATH	Protein disulfide-isomerase 5-1 GN=PDIL5-1	ident:97/147 pos:118/147 query:147 hit:146 align:139 bit:207.2	OK	Protein disulfide-isomerase 5-1 (AtPDIL5-1)	Protein disulfide-isomerase 6-1 (AtPDIL6-1)	PDI51_ARATH	Q8GYD1	Q96313; Q9LN11	PDIL5-1	PDIL6-1	Arabidopsis thaliana (Mouse-ear cress)	3702
High	Master Protein	GLYMA_07G218700	K14003 - prolactin regulatory element-binding protein (PREB, SEC12) (1 of 3)	0	12.578	7	2	3	2	400	43.3	5.8	9.3	2	0	1.335	0.891277	109.37	85.7	114.3	18.11	117.47	High	High	Peak Found	Peak Found	Peak Found	Peak Found	1		3	3	Present Both	1	GLYMA_07G218700	GLYMA_07G218700	sp|Q39221|STLP2_ARATH	SEC12-like protein 2 GN=STL2P	ident:182/400 pos:246/400 query:400 hit:393 align:363 bit:322.8	Poor_match	SEC12-like protein 2	na	STLP2_ARATH	Q39221	Q7EP29; Q8VZ72	STL2P	ST12P	Arabidopsis thaliana (Mouse-ear cress)	3702
High	Master Protein	GLYMA_01G215800	K14295 - nuclear pore complex protein Nup50 (NUP50, NPAP60) (1 of 2)	0	19.348	11	3	6	3	358	38.8	7.12	16.48	3	0	0.784	0.870724	24.65	110.6	89.4	11.14	22.32	High	High	Not Found	High	High	High	1		2	3	Present Both	1	GLYMA_01G215800	GLYMA_01G215800	sp|Q3E9N1|PP359_ARATH	Pentatricopeptide repeat-containing protein At4g39952, mitochondrial GN=PCMP-E98	ident:35/358 pos:55/358 query:358 hit:775 align:126 bit:31.2	Partial_match_both	Pentatricopeptide repeat-containing protein At4g39952, mitochondrial	na	PP359_ARATH	Q3E9N1	na	PCMP-E98	na	Arabidopsis thaliana (Mouse-ear cress)	3702
High	Master Protein	GLYMA_13G363900	K14309 - nuclear pore complex protein Nup93 (NUP93, NIC96) (1 of 2)	0	43.329	11	6	24	6	861	95.8	6.81	58.49	6	0	0.894	0.942237	76.63	106.3	93.7	58.79	29.02	High	High	High	High	High	High	1		3	3	Present Both	1	GLYMA_13G363900	GLYMA_13G363900	sp|O22224|NP93A_ARATH	Nuclear pore complex protein NUP93A GN=NUP93A	ident:649/861 pos:747/861 query:861 hit:861 align:861 bit:1347.4	OK	Nuclear pore complex protein NUP93A	Nucleoporin 93A	NP93A_ARATH	O22224	Q94CF2	NUP93A	na	Arabidopsis thaliana (Mouse-ear cress)	3702
High	Master Protein	GLYMA_02G147200	K14319 - Ran GTPase-activating protein 1 (RANGAP1) (1 of 4)	0	14.159	6	3	6	1	533	57.7	4.78	18.08	3	0	0.669	0.797038	5.13	119.8	80.2	10.89		High	High	Not Found	High	Not Found	Not Found	1	Acetyl [N-Term]	2	1	Only Control	1	GLYMA_02G147200	GLYMA_02G147200	sp|Q9LE82|RAGP1_ARATH	RAN GTPase-activating protein 1 GN=RANGAP1	ident:350/533 pos:422/533 query:533 hit:535 align:505 bit:709.5	OK	RAN GTPase-activating protein 1 (AtRanGAP1; RanGAP1)	na	RAGP1_ARATH	Q9LE82	na	RANGAP1	na	Arabidopsis thaliana (Mouse-ear cress)	3702
High	Master Protein	GLYMA_10G026700	K14319 - Ran GTPase-activating protein 1 (RANGAP1) (1 of 4)	0	7.408	6	3	4	1	534	57.8	4.74	7.8	3	1	0.526	0.605901	4.44	131.1	68.9	24.98	0.78	High	Not Found	Not Found	Not Found	Not Found	Not Found	1	Acetyl [N-Term]	1	0	Missing Both	1	GLYMA_10G026700	GLYMA_10G026700	sp|Q9LE82|RAGP1_ARATH	RAN GTPase-activating protein 1 GN=RANGAP1	ident:345/534 pos:418/534 query:534 hit:535 align:506 bit:699.9	OK	RAN GTPase-activating protein 1 (AtRanGAP1; RanGAP1)	na	RAGP1_ARATH	Q9LE82	na	RANGAP1	na	Arabidopsis thaliana (Mouse-ear cress)	3702
High	Master Protein	GLYMA_03G019600	K14324 - histone deacetylase complex subunit SAP18 (SAP18) (1 of 1)	0	38.595	34	6	20	6	151	16.8	9.42	44.17	6	0	0.764	0.854204	41.3	84.4	115.6	45.36	84.92	High	High	High	High	High	High	1		3	3	Present Both	1	GLYMA_03G019600	GLYMA_03G019600	sp|O64644|SAP18_ARATH	Histone deacetylase complex subunit SAP18 GN=SAP12	ident:103/151 pos:121/151 query:151 hit:152 align:151 bit:195.7	OK	Histone deacetylase complex subunit SAP18	18 kDa Sin3-associated polypeptide	SAP18_ARATH	O64644	Q0WTU2; Q8L8K8	OrderedLocusNames=At2g45640	na	Arabidopsis thaliana (Mouse-ear cress)	3702
Medium	Master Protein	GLYMA_08G172000	K14325 - RNA-binding protein with serine-rich domain 1 (RNPS1) (1 of 2)	0.01	1.737	2	1	3	1	422	46.9	12.34	3.88	1	0	0.739	0.841366	9.67	115	85	3.41	17.17	High	High	Not Found	High	Not Found	Peak Found	1		2	2	Present Both	1	GLYMA_08G172000	GLYMA_08G172000	sp|Q9SEE9|SR45_ARATH	Serine/arginine-rich splicing factor SR45 GN=SR45	ident:129/422 pos:147/422 query:422 hit:414 align:182 bit:224.2	Partial_match_both	Serine/arginine-rich splicing factor SR45 (At-SR45; AtSR45)	na	SR45_ARATH	Q9SEE9	F4I4H8; Q5E925; Q94AS1	SR45	RNPS1	Arabidopsis thaliana (Mouse-ear cress)	3702
High	Master Protein	GLYMA_11G237200	K14563 - rRNA 2'-O-methyltransferase fibrillarin (NOP1, FBL) (1 of 4)	0	32.24	15	5	11	5	315	33.2	10.04	38.95	5	0	1.268	0.904638	60.66	102.3	97.7	12.67	77.26	High	High	High	High	High	High	1		3	3	Present Both	1	GLYMA_11G237200	GLYMA_11G237200	sp|Q94AH9|MD36A_ARATH	Mediator of RNA polymerase II transcription subunit 36a GN=MED36A	ident:222/315 pos:234/315 query:315 hit:320 align:244 bit:468.0	OK	Mediator of RNA polymerase II transcription subunit 36a	Fibrillarin-like protein 2; Histone-glutamine methyltransferase; rRNA 2'-O-methyltransferase fibrillarin 2	MD36A_ARATH	Q94AH9	Q9SZZ1	MED36A	FIB2; FLP; MED36_1	Arabidopsis thaliana (Mouse-ear cress)	3702
High	Master Protein	GLYMA_11G114300	K14565 - nucleolar protein 58 (NOP58) (1 of 2)	0	13.947	5	2	4	2	551	60.8	9.03	9.7	2	0	1.21	0.964794	77.59	96.1	103.9	14.97	73.75	High	High	Not Found	High	High	Peak Found	1		2	3	Present Both	1	GLYMA_11G114300	GLYMA_11G114300	sp|O04658|NOP5A_ARATH	Probable nucleolar protein 5-1 GN=NOP5-1	ident:373/551 pos:428/551 query:551 hit:533 align:496 bit:750.0	OK	Probable nucleolar protein 5-1	MAR-binding NOP56/58 homolog 1; NOP58-like protein F108; Nucleolar protein 58-1	NOP5A_ARATH	O04658	Q8H0T7; Q9FPT6	NOP5-1	NOP58-1	Arabidopsis thaliana (Mouse-ear cress)	3702
High	Master Protein	GLYMA_16G043500	K14641 - apyrase (APY1_2) (1 of 6)	0	7.021	2	1	3	1	463	50.4	5.14	7.71	1	0	0.717	0.817898	0.29	116.5	83.5	0.55		High	High	Not Found	High	Not Found	Not Found	1		2	1	Only Control	1	GLYMA_16G043500	GLYMA_16G043500	sp|Q9SPM5|APY2_ARATH	Apyrase 2 GN=APY2	ident:255/463 pos:327/463 query:463 hit:472 align:403 bit:515.8	OK	Apyrase 2 (AtAPY2)	ATP-diphosphatase; ATP-diphosphohydrolase; Adenosine diphosphatase (ADPase); NTPDase; Nucleoside triphosphate diphosphohydrolase 2	APY2_ARATH	Q9SPM5	F4JWK7; I1VCB1; Q8L704; Q9M7B3	APY2	na	Arabidopsis thaliana (Mouse-ear cress)	3702
High	Master Protein	GLYMA_13G081500	K14677 - aminoacylase (ACY1) (1 of 2)	0	75.993	36	11	21	11	446	49.6	6.21	49.9	11	0	2.171	0.527458	97.9	52.9	147.1	47.93	100.45	High	Peak Found	High	High	High	High	1		3	3	Present Both	1	GLYMA_13G081500	GLYMA_13G081500	sp|Q9C5C4|ARGE_ARATH	Acetylornithine deacetylase GN=ARF23	ident:88/446 pos:147/446 query:446 hit:440 align:384 bit:50.4	Poor_match	Acetylornithine deacetylase	N-acetylornithinase (AO; Acetylornithinase; NAO)	ARGE_ARATH	Q9C5C4	O23622; O49682	OrderedLocusNames=At4g17830	na	Arabidopsis thaliana (Mouse-ear cress)	3702
Medium	Master Protein	GLYMA_01G231400	K14826 - FK506-binding nuclear protein [EC:5.2.1.8] (FPR3_4) (1 of 3)	0.025	1.242	2	1	2	1	503	55.2	6.1	3.5	1	0	1.23	0.952604	59.92	89.7	110.3	28.41	62.78	High	Peak Found	Not Found	High	Not Found	Peak Found	1		2	2	Present Both	1	GLYMA_01G231400	GLYMA_01G231400	sp|Q93ZG9|FKB53_ARATH	Peptidyl-prolyl cis-trans isomerase FKBP53 GN=FKBP53	ident:235/503 pos:322/503 query:503 hit:477 align:514 bit:346.7	Poor_match	Peptidyl-prolyl cis-trans isomerase FKBP53 (PPIase FKBP53)	FK506-binding protein 53 (AtFKBP53); Immunophilin FKBP53; Rotamase	FKB53_ARATH	Q93ZG9	Q9STK2	FKBP53	na	Arabidopsis thaliana (Mouse-ear cress)	3702
High	Master Protein	GLYMA_10G198300	K14944 - RNA-binding protein Nova (NOVA) (1 of 2)	0	21.211	12	3	6	3	337	36.3	6.71	13.3	3	0	1.101	0.972386	113.54	108.3	91.7	23.31	127.63	High	High	Peak Found	Peak Found	Peak Found	High	1		3	3	Present Both	1	GLYMA_10G198300	GLYMA_10G198300	sp|Q9LZ82|BTR1_ARATH	Protein BTR1 GN=BTR1	ident:220/337 pos:266/337 query:337 hit:313 align:333 bit:437.2	OK	Protein BTR1	Binding to ToMV RNA 1	BTR1_ARATH	Q9LZ82	B9DH67; F4JW99	BTR1	na	Arabidopsis thaliana (Mouse-ear cress)	3702
High	Master Protein	GLYMA_13G055200	K15030 - translation initiation factor 3 subunit M (EIF3M) (1 of 3)	0	15.2	7	1	3	1	410	46.3	5.01	19.16	1	0	100	6.62973e-17			200			High	Not Found	Not Found	Not Found	Not Found	High	1		1	1	Missing Both	1	GLYMA_13G055200	GLYMA_13G055200	sp|Q8RWF0|PS13A_ARATH	26S proteasome non-ATPase regulatory subunit 13 homolog A GN=RPN9A	ident:35/410 pos:76/410 query:410 hit:386 align:141 bit:48.9	Partial_match_both	26S proteasome non-ATPase regulatory subunit 13 homolog A	26S proteasome regulatory subunit RPN9a (AtRNP9a); 26S proteasome regulatory subunit S11 homolog A	PS13A_ARATH	Q8RWF0	Q9FK79	RPN9A	na	Arabidopsis thaliana (Mouse-ear cress)	3702
High	Master Protein	GLYMA_17G135200	K15033 - peptidyl-tRNA hydrolase ICT1 [EC:3.1.1.29] (ICT1) (1 of 2)	0	10.955	6	1	1	1	230	25.4	10.37	2.94	1	0	0.01	6.62973e-17		200		7.85		High	Peak Found	Not Found	Not Found	Not Found	Not Found	1		2	0	Only Control	1	GLYMA_17G135200.3.p	GLYMA_17G135200.3.p	sp|Q8RX79|APG3_ARATH	Peptide chain release factor APG3, chloroplastic GN=APG3	ident:15/230 pos:20/230 query:230 hit:422 align:25 bit:38.9	Partial_match_both	Peptide chain release factor APG3, chloroplastic	Chloroplast ribosome release factor 1 (AtcpRF1); Protein ALBINO AND PALE GREEN 3	APG3_ARATH	Q8RX79	Q9LYD0	APG3	na	Arabidopsis thaliana (Mouse-ear cress)	3702
High	Master Protein	GLYMA_02G272700	K15376 - gephyrin (GPHN) (1 of 1)	0	15.2	2	1	2	1	652	69	7.08	8.68	1	0	0.01	6.62973e-17		200		7.77		High	High	Not Found	Not Found	Not Found	Not Found	1	Acetyl [N-Term]	2	0	Only Control	1	GLYMA_02G272700	GLYMA_02G272700	sp|Q39054|CNX1_ARATH	Molybdopterin biosynthesis protein CNX1 GN=CNX1	ident:458/652 pos:553/652 query:652 hit:670 align:658 bit:945.7	OK	Molybdopterin adenylyltransferase	Molybdenum cofactor biosynthesis enzyme CNX1 (MPT Mo-transferase); Domain E (MPT adenylyltransferase); Domain G	CNX1_ARATH	Q39054	na	CNX1	na	Arabidopsis thaliana (Mouse-ear cress)	3702
High	Master Protein	GLYMA_15G026400	K15718 - linoleate 9S-lipoxygenase (LOX1_5) (1 of 21)	0	707.785	52	58	313	10	856	96.3	6.81	1121.19	58	46	0.825	0.890508	50.22	114.3	85.7	27.27	26.23	High	High	High	High	High	High	1	Acetyl [N-Term]	3	3	Present Both	1	GLYMA_15G026400	GLYMA_15G026400	sp|Q06327|LOX1_ARATH	Linoleate 9S-lipoxygenase 1 GN=LOX1	ident:494/856 pos:651/856 query:856 hit:859 align:879 bit:1000.4	OK	Linoleate 9S-lipoxygenase 1	Lipoxygenase 1 (AtLOX1)	LOX1_ARATH	Q06327	Q9FZ30	LOX1	na	Arabidopsis thaliana (Mouse-ear cress)	3702
High	Master Protein	GLYMA_15G026500	K15718 - linoleate 9S-lipoxygenase (LOX1_5) (1 of 21)	0	669.555	45	51	286	5	853	96.6	6.07	1037.17	51	15	0.792	0.866034	60.6	146.7	53.3	31.97	91.08	High	High	High	High	High	High	1		3	3	Present Both	1	GLYMA_15G026500	GLYMA_15G026500	sp|Q06327|LOX1_ARATH	Linoleate 9S-lipoxygenase 1 GN=LOX1	ident:498/853 pos:647/853 query:853 hit:859 align:861 bit:1012.7	OK	Linoleate 9S-lipoxygenase 1	Lipoxygenase 1 (AtLOX1)	LOX1_ARATH	Q06327	Q9FZ30	LOX1	na	Arabidopsis thaliana (Mouse-ear cress)	3702
High	Master Protein	GLYMA_13G347700	K15718 - linoleate 9S-lipoxygenase (LOX1_5) (1 of 21)	0	596.851	46	48	249	6	853	96.4	6.1	862.37	48	0	1.265	0.906527	100.56	95.1	104.9	60.84	130.27	High	High	High	Peak Found	High	High	1		3	3	Present Both	1	GLYMA_13G347700	GLYMA_13G347700	sp|Q06327|LOX1_ARATH	Linoleate 9S-lipoxygenase 1 GN=LOX1	ident:501/853 pos:650/853 query:853 hit:859 align:861 bit:1016.5	OK	Linoleate 9S-lipoxygenase 1	Lipoxygenase 1 (AtLOX1)	LOX1_ARATH	Q06327	Q9FZ30	LOX1	na	Arabidopsis thaliana (Mouse-ear cress)	3702
High	Master Protein	GLYMA_13G347800	K15718 - linoleate 9S-lipoxygenase (LOX1_5) (1 of 21)	0	546.785	43	50	241	4	822	92.7	7.01	806.47	50	4	0.907	0.948866	55.5	107.6	92.4	32.09	32.87	High	High	High	High	High	Peak Found	1	Acetyl [N-Term]	3	3	Present Both	1	GLYMA_13G347800	GLYMA_13G347800	sp|Q06327|LOX1_ARATH	Linoleate 9S-lipoxygenase 1 GN=LOX1	ident:460/822 pos:611/822 query:822 hit:859 align:840 bit:928.3	OK	Linoleate 9S-lipoxygenase 1	Lipoxygenase 1 (AtLOX1)	LOX1_ARATH	Q06327	Q9FZ30	LOX1	na	Arabidopsis thaliana (Mouse-ear cress)	3702
High	Master Protein	GLYMA_07G007000	K15718 - linoleate 9S-lipoxygenase (LOX1_5) (1 of 21)	0	403.389	45	43	107	32	864	96.8	6.15	301.33	43	12	1.153	0.95672	96.02	111	89	28.49	152.7	High	High	High	High	High	High	1		3	3	Present Both	1	GLYMA_07G007000	GLYMA_07G007000	sp|Q06327|LOX1_ARATH	Linoleate 9S-lipoxygenase 1 GN=LOX1	ident:484/864 pos:623/864 query:864 hit:859 align:869 bit:983.4	OK	Linoleate 9S-lipoxygenase 1	Lipoxygenase 1 (AtLOX1)	LOX1_ARATH	Q06327	Q9FZ30	LOX1	na	Arabidopsis thaliana (Mouse-ear cress)	3702
High	Master Protein	GLYMA_07G006900	K15718 - linoleate 9S-lipoxygenase (LOX1_5) (1 of 21)	0	221.416	23	23	87	12	859	96.3	6.7	222.48	23	2	0.677	0.783621	31.78	119	81	14.19	19.21	High	High	High	High	High	Peak Found	1		3	3	Present Both	1	GLYMA_07G006900	GLYMA_07G006900	sp|Q06327|LOX1_ARATH	Linoleate 9S-lipoxygenase 1 GN=LOX1	ident:488/859 pos:630/859 query:859 hit:859 align:879 bit:981.1	OK	Linoleate 9S-lipoxygenase 1	Lipoxygenase 1 (AtLOX1)	LOX1_ARATH	Q06327	Q9FZ30	LOX1	na	Arabidopsis thaliana (Mouse-ear cress)	3702
High	Master Protein	GLYMA_08G189300	K15718 - linoleate 9S-lipoxygenase (LOX1_5) (1 of 21)	0	26.817	5	4	11	3	857	98.6	6.57	23.93	4	0	1.405	0.89095	38.37	83.2	116.8	1.06	35.68	High	High	Not Found	High	Peak Found	Not Found	1		2	2	Present Both	1	GLYMA_08G189300	GLYMA_08G189300	sp|Q06327|LOX1_ARATH	Linoleate 9S-lipoxygenase 1 GN=LOX1	ident:436/857 pos:576/857 query:857 hit:859 align:880 bit:808.1	OK	Linoleate 9S-lipoxygenase 1	Lipoxygenase 1 (AtLOX1)	LOX1_ARATH	Q06327	Q9FZ30	LOX1	na	Arabidopsis thaliana (Mouse-ear cress)	3702
High	Master Protein	GLYMA_04G203000	K15979 - staphylococcal nuclease domain-containing protein 1 (SND1) (1 of 4)	0	32.714	7	5	6	3	990	108.9	6.49	14.52	5	2	0.915	0.952604	19.63	111.2	88.8	24.47	88.28	High	Not Found	Not Found	Not Found	Not Found	High	1		1	1	Missing Both	1	GLYMA_04G203000	GLYMA_04G203000	sp|Q8VZG7|TSN1_ARATH	Ribonuclease TUDOR 1 GN=TSN1	ident:720/990 pos:843/990 query:990 hit:991 align:994 bit:1462.6	OK	Ribonuclease TUDOR 1 (AtTudor1; TUDOR-SN protein 1)	na	TSN1_ARATH	Q8VZG7	F4K6N0; Q9LY25	TSN1	na	Arabidopsis thaliana (Mouse-ear cress)	3702
High	Master Protein	GLYMA_12G007600	K16615 - actin-related protein 7, plant (PARP7) (1 of 3)	0	8.341	4	1	2	1	361	39.5	4.91	5.77	1	0	0.01	6.62973e-17		200		20.33		High	High	Not Found	Not Found	Not Found	Not Found	1	Acetyl [N-Term]	2	0	Only Control	1	GLYMA_12G007600	GLYMA_12G007600	sp|Q8L4Y5|ARP7_ARATH	Actin-related protein 7 GN=ARP7	ident:289/361 pos:332/361 query:361 hit:363 align:364 bit:614.0	OK	Actin-related protein 7	na	ARP7_ARATH	Q8L4Y5	Q0WW62; Q9LZY1	ARP7	na	Arabidopsis thaliana (Mouse-ear cress)	3702
High	Master Protein	GLYMA_04G131800	K17080 - prohibitin 1 (PHB1) (1 of 3)	0	532.443	96	27	167	5	279	30.4	8.35	722.84	27	27	1.003	0.988586	76.82	105.4	94.6	14.47	88.97	High	High	High	High	High	High	1		3	3	Present Both	1	GLYMA_04G131800	GLYMA_04G131800	sp|O04331|PHB3_ARATH	Prohibitin-3, mitochondrial GN=PHB3	ident:226/279 pos:257/279 query:279 hit:277 align:275 bit:474.9	OK	Prohibitin-3, mitochondrial (Atphb3)	Protein ENHANCED ETHYLENE RESPONSE 3	PHB3_ARATH	O04331	na	PHB3	EER3	Arabidopsis thaliana (Mouse-ear cress)	3702
High	Master Protein	GLYMA_06G317500	K17080 - prohibitin 1 (PHB1) (1 of 3)	0	508.66	83	25	159	3	279	30.3	8.37	681.47	25	0	0.876	0.926868	43.62	103.3	96.7	23.64	113.96	High	High	High	High	High	High	1		3	3	Present Both	1	GLYMA_06G317500	GLYMA_06G317500	sp|O04331|PHB3_ARATH	Prohibitin-3, mitochondrial GN=PHB3	ident:228/279 pos:259/279 query:279 hit:277 align:275 bit:479.9	OK	Prohibitin-3, mitochondrial (Atphb3)	Protein ENHANCED ETHYLENE RESPONSE 3	PHB3_ARATH	O04331	na	PHB3	EER3	Arabidopsis thaliana (Mouse-ear cress)	3702
High	Master Protein	GLYMA_08G232000	K17080 - prohibitin 1 (PHB1) (1 of 3)	0	426.45	75	22	138	5	280	30.5	8.35	557.34	22	0	1.028	0.996743	76.9	110.9	89.1	9.09	80.5	High	High	High	High	High	High	1		3	3	Present Both	1	GLYMA_08G232000	GLYMA_08G232000	sp|O04331|PHB3_ARATH	Prohibitin-3, mitochondrial GN=PHB3	ident:230/280 pos:263/280 query:280 hit:277 align:276 bit:486.5	OK	Prohibitin-3, mitochondrial (Atphb3)	Protein ENHANCED ETHYLENE RESPONSE 3	PHB3_ARATH	O04331	na	PHB3	EER3	Arabidopsis thaliana (Mouse-ear cress)	3702
High	Master Protein	GLYMA_09G173500	K17081 - prohibitin 2 (PHB2) (1 of 4)	0	197.147	54	15	74	3	289	31.8	9.72	277.19	15	0	2.213	0.515142	115.35	108	92	35.79	88.77	High	High	High	High	High	High	1		3	3	Present Both	1	GLYMA_09G173500	GLYMA_09G173500	sp|Q9ZNT7|PHB2_ARATH	Prohibitin-2, mitochondrial GN=PHB2	ident:236/289 pos:268/289 query:289 hit:286 align:282 bit:480.7	OK	Prohibitin-2, mitochondrial (Atphb2)	na	PHB2_ARATH	Q9ZNT7	F4I2J2	PHB2	na	Arabidopsis thaliana (Mouse-ear cress)	3702
High	Master Protein	GLYMA_11G109400	K17081 - prohibitin 2 (PHB2) (1 of 4)	0	142.416	52	12	64	4	289	31.8	9.42	264.35	12	2	1.644	0.751709	103.02	73.2	126.8	19.75	64.94	High	High	High	High	High	High	1		3	3	Present Both	1	GLYMA_11G109400	GLYMA_11G109400	sp|Q9SIL6|PHB6_ARATH	Prohibitin-6, mitochondrial GN=PHB6	ident:237/289 pos:264/289 query:289 hit:286 align:289 bit:466.1	OK	Prohibitin-6, mitochondrial (Atphb6)	na	PHB6_ARATH	Q9SIL6	na	PHB6	na	Arabidopsis thaliana (Mouse-ear cress)	3702
High	Master Protein	GLYMA_04G060000	K17278 - membrane-associated progesterone receptor component (PGRMC1_2) (1 of 10)	0	12.873	23	2	4	2	100	10.9	6.73	10.57	2	0	0.917	0.94962	53.64	104.5	95.5	36.1	36.91	High	High	High	High	Not Found	Peak Found	1		3	2	Present Both	1	GLYMA_04G060000	GLYMA_04G060000	sp|Q9SK39|SBP3_ARATH	Probable steroid-binding protein 3 GN=MP3	ident:77/100 pos:90/100 query:100 hit:100 align:100 bit:171.0	OK	Probable steroid-binding protein 3 (AtMP3)	Membrane-associated progesterone-binding protein 2 (AtMAPR2)	SBP3_ARATH	Q9SK39	na	MP3	MAPR2	Arabidopsis thaliana (Mouse-ear cress)	3702
High	Master Protein	GLYMA_07G072800	K17411 - small subunit ribosomal protein S33 (MRPS33) (1 of 3)	0	24.089	40	3	9	2	102	11.7	10.89	17.72	3	1	1.194	0.959215	48.37	100	100	1.51	70.35	High	Peak Found	Not Found	High	Peak Found	High	1		2	3	Present Both	1	GLYMA_07G072800	GLYMA_07G072800	sp|F4JN35|NTL9_ARATH	Protein NTM1-like 9 GN=NTL9	ident:18/102 pos:26/102 query:102 hit:512 align:64 bit:26.9	Partial_match_both	Protein NTM1-like 9	Calmodulin-binding NAC protein	NTL9_ARATH	F4JN35	O81790; Q93ZN0	NTL9	na	Arabidopsis thaliana (Mouse-ear cress)	3702
High	Master Protein	GLYMA_19G077100	K17435 - large subunit ribosomal protein L54 (MRPL54) (1 of 2)	0	68.751	42	6	27	6	131	14.6	10.04	79.23	6	0	1.388	0.858942	40.87	82.2	117.8	10.2	44.44	High	High	High	High	High	High	1		3	3	Present Both	1	GLYMA_19G077100	GLYMA_19G077100	sp|Q9LS44|PCR4_ARATH	Protein PLANT CADMIUM RESISTANCE 4 GN=PCR4	ident:13/131 pos:17/131 query:131 hit:184 align:32 bit:29.3	Partial_match_both	Protein PLANT CADMIUM RESISTANCE 4 (AtPCR4)	na	PCR4_ARATH	Q9LS44	na	PCR4	na	Arabidopsis thaliana (Mouse-ear cress)	3702
High	Master Protein	GLYMA_16G026200	K17525 - chitinase domain-containing protein 1 (CHID1) (1 of 4)	0	192.488	34	17	60	7	455	47.5	5.58	185.05	17	8	0.637	0.733061	24.79	129.4	70.6	28.54	74.8	High	High	High	High	High	Not Found	1		3	2	Present Both	1	GLYMA_16G026200	GLYMA_16G026200	sp|Q9M158|STR4_ARATH	Rhodanese-like domain-containing protein 4, chloroplastic GN=STR4	ident:263/455 pos:324/455 query:455 hit:466 align:469 bit:443.0	OK	Rhodanese-like domain-containing protein 4, chloroplastic	Protein THYLAKOID RHODANESE-LIKE; Sulfurtransferase 4 (AtStr4)	STR4_ARATH	Q9M158	O04623; Q0WWP1; Q93VZ2	STR4	na	Arabidopsis thaliana (Mouse-ear cress)	3702
High	Master Protein	GLYMA_07G057200	K17525 - chitinase domain-containing protein 1 (CHID1) (1 of 4)	0	128.716	27	14	43	4	444	46.4	6.23	130.7	14	0	0.383	0.319874	2.19	153.6	46.4	12.43	14.92	High	High	High	Peak Found	High	Not Found	1		3	2	Present Both	1	GLYMA_07G057200	GLYMA_07G057200	sp|Q9M158|STR4_ARATH	Rhodanese-like domain-containing protein 4, chloroplastic GN=STR4	ident:260/444 pos:320/444 query:444 hit:466 align:468 bit:438.0	OK	Rhodanese-like domain-containing protein 4, chloroplastic	Protein THYLAKOID RHODANESE-LIKE; Sulfurtransferase 4 (AtStr4)	STR4_ARATH	Q9M158	O04623; Q0WWP1; Q93VZ2	STR4	na	Arabidopsis thaliana (Mouse-ear cress)	3702
High	Master Protein	GLYMA_08G346200	K17732 - mitochondrial-processing peptidase subunit beta [EC:3.4.24.64] (PMPCB, MAS1) (1 of 3)	0	317.094	61	30	113	10	528	58.9	6.98	369.33	30	18	0.917	0.952604	68.2	110.6	89.4	41.72	78.87	High	High	High	High	High	High	1		3	3	Present Both	1	GLYMA_08G346200	GLYMA_08G346200	sp|Q42290|MPPB_ARATH	Probable mitochondrial-processing peptidase subunit beta, mitochondrial GN=MORF8	ident:415/528 pos:470/528 query:528 hit:531 align:534 bit:878.2	OK	Probable mitochondrial-processing peptidase subunit beta, mitochondrial	Beta-MPP	MPPB_ARATH	Q42290	Q0WWT6; Q9SGA7	OrderedLocusNames=At3g02090	na	Arabidopsis thaliana (Mouse-ear cress)	3702
High	Master Protein	GLYMA_18G156500	K17732 - mitochondrial-processing peptidase subunit beta [EC:3.4.24.64] (PMPCB, MAS1) (1 of 3)	0	241.728	57	26	94	6	527	58.8	6.99	288.68	26	0	0.786	0.865662	28.97	125.5	74.5	50.17	73.87	High	High	High	High	High	High	1		3	3	Present Both	1	GLYMA_18G156500	GLYMA_18G156500	sp|Q42290|MPPB_ARATH	Probable mitochondrial-processing peptidase subunit beta, mitochondrial GN=MORF8	ident:414/527 pos:470/527 query:527 hit:531 align:531 bit:870.9	OK	Probable mitochondrial-processing peptidase subunit beta, mitochondrial	Beta-MPP	MPPB_ARATH	Q42290	Q0WWT6; Q9SGA7	OrderedLocusNames=At3g02090	na	Arabidopsis thaliana (Mouse-ear cress)	3702
High	Master Protein	GLYMA_16G087200	K17732 - mitochondrial-processing peptidase subunit beta [EC:3.4.24.64] (PMPCB, MAS1) (1 of 3)	0	241.698	39	21	79	8	523	58.5	6.73	255.5	21	0	0.557	0.617513	36.28	93.6	106.4	145.62	136.86	High	High	High	High	High	High	1		3	3	Present Both	1	GLYMA_16G087200	GLYMA_16G087200	sp|Q42290|MPPB_ARATH	Probable mitochondrial-processing peptidase subunit beta, mitochondrial GN=MORF8	ident:409/523 pos:467/523 query:523 hit:531 align:531 bit:852.4	OK	Probable mitochondrial-processing peptidase subunit beta, mitochondrial	Beta-MPP	MPPB_ARATH	Q42290	Q0WWT6; Q9SGA7	OrderedLocusNames=At3g02090	na	Arabidopsis thaliana (Mouse-ear cress)	3702
Medium	Master Protein	GLYMA_12G132800	K17756 - long-chain-alcohol oxidase (FAO3) (1 of 9)	0.031	1.13	1	1	2	1	751	82.2	7.06	1.83	1	0	0.144	0.0181245	1.06	174.7	25.3	45.69		High	High	Not Found	Peak Found	Not Found	Not Found	1		2	1	Only Control	1	GLYMA_12G132800	GLYMA_12G132800	sp|Q9LW56|FAO3_ARATH	Long-chain-alcohol oxidase FAO3 GN=FAO3	ident:459/751 pos:564/751 query:751 hit:746 align:730 bit:909.8	OK	Long-chain-alcohol oxidase FAO3	Long-chain fatty alcohol oxidase 3	FAO3_ARATH	Q9LW56	Q8LGV0	FAO3	na	Arabidopsis thaliana (Mouse-ear cress)	3702
High	Master Protein	GLYMA_13G126900	K17769 - mitochondrial import receptor subunit TOM22 (TOM22) (1 of 4)	0	114.888	62	6	33	5	97	10.3	10.26	123.75	6	0	2.175	0.526031	71.48	45	155	43.51	62.25	High	High	High	High	High	High	1		3	3	Present Both	1	GLYMA_13G126900	GLYMA_13G126900	sp|Q9FNC9|TOM92_ARATH	Mitochondrial import receptor subunit TOM9-2 GN=TOM9-2	ident:60/97 pos:75/97 query:97 hit:99 align:94 bit:119.8	OK	Mitochondrial import receptor subunit TOM9-2	Mitochondrial import receptor subunit TOM22 homolog 2; Translocase of outer membrane 22 kDa subunit homolog 2; Translocase of outer membrane 9 kDa subunit TOM9-2	TOM92_ARATH	Q9FNC9	na	TOM9-2	TOM22-2	Arabidopsis thaliana (Mouse-ear cress)	3702
High	Master Protein	GLYMA_10G040200	K17769 - mitochondrial import receptor subunit TOM22 (TOM22) (1 of 4)	0	108.882	62	6	43	5	97	10.3	10.26	144.81	6	1	1.706	0.723383	48.01	84.6	115.4	22.94	94.73	High	High	High	High	High	High	1		3	3	Present Both	1	GLYMA_10G040200	GLYMA_10G040200	sp|Q9FNC9|TOM92_ARATH	Mitochondrial import receptor subunit TOM9-2 GN=TOM9-2	ident:59/97 pos:74/97 query:97 hit:99 align:94 bit:115.5	OK	Mitochondrial import receptor subunit TOM9-2	Mitochondrial import receptor subunit TOM22 homolog 2; Translocase of outer membrane 22 kDa subunit homolog 2; Translocase of outer membrane 9 kDa subunit TOM9-2	TOM92_ARATH	Q9FNC9	na	TOM9-2	TOM22-2	Arabidopsis thaliana (Mouse-ear cress)	3702
High	Master Protein	GLYMA_11G139400	K17777 - mitochondrial import inner membrane translocase subunit TIM9 (TIM9) (1 of 3)	0	210.781	62	9	126	9	93	10.8	7.21	468.5	9	0	0.897	0.942368	56.73	112	88	12.9	47.59	High	High	High	High	High	High	1	Acetyl [N-Term]	3	3	Present Both	1	GLYMA_11G139400	GLYMA_11G139400	sp|Q9XGX9|TIM9_ARATH	Mitochondrial import inner membrane translocase subunit TIM9 GN=TIM9	ident:75/93 pos:80/93 query:93 hit:93 align:93 bit:157.5	OK	Mitochondrial import inner membrane translocase subunit TIM9	Protein EMBRYO DEFECTIVE 2474	TIM9_ARATH	Q9XGX9	Q8L927; Q9SNC2	TIM9	EMB2474	Arabidopsis thaliana (Mouse-ear cress)	3702
High	Master Protein	GLYMA_03G082300	K17777 - mitochondrial import inner membrane translocase subunit TIM9 (TIM9) (1 of 3)	0	79.505	67	6	38	6	94	11.1	7.74	117.73	6	0	0.975	0.972386	68.06	101.2	98.8	24.96	10.43	High	High	High	High	High	High	1	Acetyl [N-Term]	3	3	Present Both	1	GLYMA_03G082300	GLYMA_03G082300	sp|Q9XGX9|TIM9_ARATH	Mitochondrial import inner membrane translocase subunit TIM9 GN=TIM9	ident:57/94 pos:80/94 query:94 hit:93 align:93 bit:132.9	OK	Mitochondrial import inner membrane translocase subunit TIM9	Protein EMBRYO DEFECTIVE 2474	TIM9_ARATH	Q9XGX9	Q8L927; Q9SNC2	TIM9	EMB2474	Arabidopsis thaliana (Mouse-ear cress)	3702
High	Master Protein	GLYMA_14G004700	K17778 - mitochondrial import inner membrane translocase subunit TIM10 (TIM10) (1 of 4)	0	31.372	43	3	18	1	84	9.7	7.05	36.36	3	3	0.563	0.627307	33.86	143.4	56.6	54.81	75.51	High	High	Not Found	Peak Found	High	Peak Found	1		2	3	Present Both	1	GLYMA_14G004700	GLYMA_14G004700	sp|Q9ZW33|TIM10_ARATH	Mitochondrial import inner membrane translocase subunit TIM10 GN=TIM10	ident:60/84 pos:67/84 query:84 hit:83 align:84 bit:130.2	OK	Mitochondrial import inner membrane translocase subunit TIM10	na	TIM10_ARATH	Q9ZW33	na	TIM10	na	Arabidopsis thaliana (Mouse-ear cress)	3702
High	Master Protein	GLYMA_15G034700	K17778 - mitochondrial import inner membrane translocase subunit TIM10 (TIM10) (1 of 4)	0	24.005	46	3	17	1	84	9.6	6.01	34.42	3	0	0.01	6.62973e-17		200		25.51		High	High	Not Found	Not Found	Not Found	Not Found	1		2	0	Only Control	1	GLYMA_15G034700	GLYMA_15G034700	sp|Q9ZW33|TIM10_ARATH	Mitochondrial import inner membrane translocase subunit TIM10 GN=TIM10	ident:61/84 pos:68/84 query:84 hit:83 align:84 bit:132.5	OK	Mitochondrial import inner membrane translocase subunit TIM10	na	TIM10_ARATH	Q9ZW33	na	TIM10	na	Arabidopsis thaliana (Mouse-ear cress)	3702
High	Master Protein	GLYMA_08G367400	K17781 - mitochondrial import inner membrane translocase subunit TIM13 (TIM13) (1 of 2)	0	150.244	62	9	53	4	86	9.4	8.18	209.86	9	4	1.42	0.850362	59.39	93.9	106.1	56.23	76.64	High	High	High	High	High	High	1	Acetyl [N-Term]	3	3	Present Both	1	GLYMA_08G367400	GLYMA_08G367400	sp|Q9XH48|TIM13_ARATH	Mitochondrial import inner membrane translocase subunit TIM13 GN=TIM13	ident:51/86 pos:67/86 query:86 hit:87 align:85 bit:85.9	OK	Mitochondrial import inner membrane translocase subunit TIM13	na	TIM13_ARATH	Q9XH48	Q94KC4; Q9SY93	TIM13	na	Arabidopsis thaliana (Mouse-ear cress)	3702
High	Master Protein	GLYMA_13G000600	K17781 - mitochondrial import inner membrane translocase subunit TIM13 (TIM13) (1 of 2)	0	118.127	62	7	32	2	86	9.3	7.8	135.6	7	0	1.336	0.87433	54.31	81	119	11.19	58.13	High	High	High	High	High	Not Found	1	Acetyl [N-Term]	3	2	Present Both	1	GLYMA_13G000600	GLYMA_13G000600	sp|Q9XH48|TIM13_ARATH	Mitochondrial import inner membrane translocase subunit TIM13 GN=TIM13	ident:51/86 pos:67/86 query:86 hit:87 align:87 bit:87.0	OK	Mitochondrial import inner membrane translocase subunit TIM13	na	TIM13_ARATH	Q9XH48	Q94KC4; Q9SY93	TIM13	na	Arabidopsis thaliana (Mouse-ear cress)	3702
High	Master Protein	GLYMA_04G256400	K17784 - mitochondrial inner membrane organizing system protein 1 (MINOS1, MOS1) (1 of 2)	0	15.082	44	3	7	3	97	10.5	5.4	16.96	3	0	2.021	0.582299	87.15	95.4	104.6	44.08	102.33	High	High	Peak Found	High	High	High	1		3	3	Present Both	1	GLYMA_04G256400	GLYMA_04G256400	sp|Q67ZE1|HSDD2_ARATH	3beta-hydroxysteroid-dehydrogenase/decarboxylase isoform 2 GN=3BETAHSD/D2	ident:10/97 pos:19/97 query:97 hit:564 align:29 bit:27.3	Partial_match_both	3beta-hydroxysteroid-dehydrogenase/decarboxylase isoform 2 (At3BETAHSD/D2)	4alpha-carboxysterol-C3-dehydrogenase/C4-decarboxylase isoform 1-2; Reticulon-like protein B19 (AtRTNLB19); Sterol-4-alpha-carboxylate 3-dehydrogenase 2, decarboxylating	HSDD2_ARATH	Q67ZE1	O64845	3BETAHSD/D2	RTNLB19	Arabidopsis thaliana (Mouse-ear cress)	3702
High	Master Protein	GLYMA_01G007700	K17795 - mitochondrial import inner membrane translocase subunit TIM17 (TIM17) (1 of 3)	0	46.851	35	4	8	4	200	20.9	5.12	31.1	4	0	1.429	0.879417	80.47	74.4	125.6	34.87	46.37	High	High	Peak Found	High	High	High	1		3	3	Present Both	1	GLYMA_01G007700	GLYMA_01G007700	sp|Q9SP35|TI172_ARATH	Mitochondrial import inner membrane translocase subunit TIM17-2 GN=TIM17-2	ident:150/200 pos:167/200 query:200 hit:243 align:243 bit:280.4	OK	Mitochondrial import inner membrane translocase subunit TIM17-2	na	TI172_ARATH	Q9SP35	Q9ZUS5	TIM17-2	na	Arabidopsis thaliana (Mouse-ear cress)	3702
High	Master Protein	GLYMA_04G107400	K17804 - mitochondrial import inner membrane translocase subunit TIM44 (TIM44) (1 of 1)	0	5.728	3	1	2	1	473	54.4	8.82	3.77	1	0	0.325	0.263754	1.86	151	49	16.71		High	Peak Found	Not Found	Peak Found	Not Found	High	1		2	2	Present Both	1	GLYMA_04G107400	GLYMA_04G107400	sp|Q5XF06|TI442_ARATH	Mitochondrial import inner membrane translocase subunit TIM44-2 GN=TIM44-2	ident:281/473 pos:369/473 query:473 hit:469 align:483 bit:550.4	OK	Mitochondrial import inner membrane translocase subunit TIM44-2	na	TI442_ARATH	Q5XF06	Q8S8E5	TIM44-2	na	Arabidopsis thaliana (Mouse-ear cress)	3702
High	Master Protein	GLYMA_02G080100	K17805 - mitochondrial import inner membrane translocase subunit TIM16 (PAM16, TIM16) (1 of 3)	0	22.782	22	2	6	2	117	12.9	9.33	20.55	2	0	1.382	0.879779	68.05	83.9	116.1	11.11	54.9	High	High	Peak Found	High	High	High	1		3	3	Present Both	1	GLYMA_02G080100	GLYMA_02G080100	sp|Q93VV9|TM16B_ARATH	Mitochondrial import inner membrane translocase subunit PAM16 like 2 GN=PAM16L2	ident:85/117 pos:98/117 query:117 hit:116 align:115 bit:179.5	OK	Mitochondrial import inner membrane translocase subunit PAM16 like 2 (AtPAM16; AtPAM16L2)	Presequence translocated-associated motor subunit PAM16; Protein MUTANT SNC1-ENHANCING 5; Protein THAXTOMIN A RESISTANT 1	TM16B_ARATH	Q93VV9	Q9LX43	PAM16L2	na	Arabidopsis thaliana (Mouse-ear cress)	3702
High	Master Protein	GLYMA_08G072300	K17893 - ubiquinol oxidase (AOX1, AOX2) (1 of 4)	0	12.674	7	2	8	2	333	38.1	9.32	15.05	2	0	0.618	0.706764	31.1	134.2	65.8	49.07	57.9	High	High	High	High	High	High	1		3	3	Present Both	1	GLYMA_08G072300	GLYMA_08G072300	sp|O22049|AOX2_ARATH	Ubiquinol oxidase 2, mitochondrial GN=AOX2	ident:212/333 pos:244/333 query:333 hit:353 align:283 bit:456.1	OK	Ubiquinol oxidase 2, mitochondrial	Alternative oxidase 2	AOX2_ARATH	O22049	Q4PS98	AOX2	na	Arabidopsis thaliana (Mouse-ear cress)	3702
High	Master Protein	GLYMA_09G123800	K17991 - peroxygenase (PXG) (1 of 7)	0	3.373	4	1	2	1	204	22.6	8.95	3.47	1	0	0.584	0.73785	8.7	126.3	73.7	26.71		High	Peak Found	Peak Found	High	Not Found	Not Found	1		3	1	Only Control	1	GLYMA_09G123800	GLYMA_09G123800	sp|Q9CAB8|PXG5_ARATH	Probable peroxygenase 5 GN=PXG5	ident:117/204 pos:135/204 query:204 hit:192 align:183 bit:240.0	OK	Probable peroxygenase 5 (AtPXG5)	Caleosin-5	PXG5_ARATH	Q9CAB8	Q0WQP7; Q8L911	PXG5	CLO4; CLO5	Arabidopsis thaliana (Mouse-ear cress)	3702
High	Master Protein	GLYMA_18G021100	K18592 - gamma-glutamyltranspeptidase / glutathione hydrolase / leukotriene-C4 hydrolase (GGT1_5) (1 of 3)	0	52.596	14	5	10	5	624	67.2	9.41	34.87	5	0	0.679	0.787015	13.31	119	81	43.58	6.34	High	High	Peak Found	High	High	Not Found	1		3	2	Present Both	1	GLYMA_18G021100	GLYMA_18G021100	sp|Q8VYW6|GAGT1_ARATH	Glutathione hydrolase 1 GN=GGT1	ident:368/624 pos:434/624 query:624 hit:572 align:560 bit:736.1	OK	Glutathione hydrolase 1	Gamma-glutamyltransferase 1; Gamma-glutamyltranspeptidase 1	GAGT1_ARATH	Q8VYW6	B9DI67; O65652	GGT1	na	Arabidopsis thaliana (Mouse-ear cress)	3702
High	Master Protein	GLYMA_19G032000	K18635 - protein SPIRAL1 and related proteins (SPR1) (1 of 7)	0	19.809	13	1	3	1	156	15.4	8.97	11.81	1	0	0.74	0.840112	45.45	114.9	85.1	15.44	74.89	High	High	Not Found	Peak Found	Peak Found	Not Found	1		2	2	Present Both	1	GLYMA_19G032000	GLYMA_19G032000	sp|B3H4F1|SP1L1_ARATH	Protein SPIRAL1-like 1 GN=SP1L1	ident:75/156 pos:80/156 query:156 hit:113 align:132 bit:121.7	Poor_match	Protein SPIRAL1-like 1	na	SP1L1_ARATH	B3H4F1	Q9FZC2	SP1L1	na	Arabidopsis thaliana (Mouse-ear cress)	3702
High	Master Protein	GLYMA_02G101700	K18749 - protein LSM14 (LSM14, RAP55, SCD6) (1 of 6)	0	14.801	5	2	2	1	616	65.1	7.8	5.53	2	0	0.01	6.62973e-17		200		19.6		High	Peak Found	Not Found	Not Found	Not Found	Not Found	1		2	0	Only Control	1	GLYMA_02G101700	GLYMA_02G101700	sp|Q9C658|DCP5_ARATH	Protein decapping 5 GN=DCP5	ident:332/616 pos:392/616 query:616 hit:611 align:582 bit:535.0	OK	Protein decapping 5	na	DCP5_ARATH	Q9C658	B9DHI7; F4IE33; Q8RWC4; Q9ASU0; Q9C604	DCP5	na	Arabidopsis thaliana (Mouse-ear cress)	3702
High	Master Protein	GLYMA_08G364600	K19032 - 30S ribosomal protein 3 (PSRP3) (1 of 1)	0	50.091	44	3	11	3	158	17.7	9.28	53.31	3	0	1.469	0.865662	116.86	111.9	88.1	11.55	25.77	High	High	Peak Found	High	Peak Found	Peak Found	1		3	3	Present Both	1	GLYMA_08G364600	GLYMA_08G364600	sp|Q9SX22|RRP31_ARATH	30S ribosomal protein 3-1, chloroplastic GN=RPT3	ident:95/158 pos:110/158 query:158 hit:166 align:162 bit:173.3	OK	30S ribosomal protein 3-1, chloroplastic	Plastid-specific 30S ribosomal protein 3-1 (PSRP-3 1)	RRP31_ARATH	Q9SX22	Q8LD87	OrderedLocusNames=At1g68590	na	Arabidopsis thaliana (Mouse-ear cress)	3702
High	Master Protein	GLYMA_06G089700	K19035 - 50S ribosomal protein 6 (PSRP6) (1 of 1)	0	47.186	47	3	19	3	98	10.4	10.27	82.45	3	0	0.919	0.952604	41.23	106.1	93.9	37.99	81.12	High	High	High	High	High	Peak Found	1		3	3	Present Both	1	GLYMA_06G089700	GLYMA_06G089700	sp|Q9FKP0|PSRP6_ARATH	50S ribosomal protein 6, chloroplastic GN=PSRP6	ident:45/98 pos:55/98 query:98 hit:106 align:81 bit:91.3	Poor_match	50S ribosomal protein 6, chloroplastic	CL25; Plastid-specific 50S ribosomal protein 6 (PSRP-6)	PSRP6_ARATH	Q9FKP0	na	PSRP6	na	Arabidopsis thaliana (Mouse-ear cress)	3702
High	Master Protein	GLYMA_19G211100	KOG0105 - Alternative splicing factor ASF/SF2 (RRM superfamily) (1 of 7)	0	20.675	15	4	6	4	313	35.3	10.26	14.59	4	0	0.677	0.792914	17.23	132.3	67.7	48.05	28.83	High	High	Peak Found	High	High	High	1		3	3	Present Both	1	GLYMA_19G211100	GLYMA_19G211100	sp|O22315|SR34_ARATH	Serine/arginine-rich-splicing factor SR34 GN=SR34	ident:187/313 pos:203/313 query:313 hit:303 align:249 bit:313.9	OK	Serine/arginine-rich-splicing factor SR34 (At-SR34; At-SRp34; AtSR34)	Pre-mRNA-splicing factor SF2; SR1 protein	SR34_ARATH	O22315	O22314; Q39201; Q564E1; Q8L7P1	SR34	SF2; SR1; SRP34	Arabidopsis thaliana (Mouse-ear cress)	3702
High	Master Protein	GLYMA_15G271200	KOG0131 - Splicing factor 3b, subunit 4 (1 of 43)	0	162.698	60	14	46	4	246	26.8	9.38	150.86	14	11	0.643	0.73785	22.9	112.5	87.5	10.28	79.77	High	High	High	High	High	Not Found	1		3	2	Present Both	1	GLYMA_15G271200	GLYMA_15G271200	sp|Q8VYM4|PSRP2_ARATH	30S ribosomal protein 2, chloroplastic GN=PSRP2	ident:150/246 pos:179/246 query:246 hit:253 align:227 bit:288.9	OK	30S ribosomal protein 2, chloroplastic	Chloroplastic small ribosomal subunit protein cS22; Plastid-specific 30S ribosomal protein 2, chloroplastic (PSRP-2)	PSRP2_ARATH	Q8VYM4	B9DG26; Q9SUZ0	PSRP2	na	Arabidopsis thaliana (Mouse-ear cress)	3702
High	Master Protein	GLYMA_08G151700	KOG0131 - Splicing factor 3b, subunit 4 (1 of 43)	0	139.983	41	12	42	2	270	29.7	9.35	125.25	12	0	0.519	0.599736	13.04	131.7	68.3	3.83	44.97	High	High	Not Found	High	High	Not Found	1		2	2	Present Both	1	GLYMA_08G151700	GLYMA_08G151700	sp|Q8VYM4|PSRP2_ARATH	30S ribosomal protein 2, chloroplastic GN=PSRP2	ident:138/270 pos:163/270 query:270 hit:253 align:180 bit:293.5	OK	30S ribosomal protein 2, chloroplastic	Chloroplastic small ribosomal subunit protein cS22; Plastid-specific 30S ribosomal protein 2, chloroplastic (PSRP-2)	PSRP2_ARATH	Q8VYM4	B9DG26; Q9SUZ0	PSRP2	na	Arabidopsis thaliana (Mouse-ear cress)	3702
Medium	Master Protein	GLYMA_12G067000	KOG0156 - Cytochrome P450 CYP2 subfamily (1 of 172)	0.016	1.437	2	1	1	1	527	59.5	8.1	0	1	0	1.039	0.998965	29.36	93.2	106.8	13.59	23.78	High	Peak Found	Peak Found	Peak Found	Peak Found	Peak Found	1		3	3	Present Both	1	GLYMA_12G067000	GLYMA_12G067000	sp|Q0WQ07|C7051_ARATH	Cytochrome P450 705A1 GN=CYP705A1	ident:181/527 pos:282/527 query:527 hit:513 align:477 bit:342.8	Poor_match	Cytochrome P450 705A1	na	C7051_ARATH	Q0WQ07	O23387	CYP705A1	na	Arabidopsis thaliana (Mouse-ear cress)	3702
High	Master Protein	GLYMA_11G221000	KOG0651 - 26S proteasome regulatory complex, ATPase RPT4 (1 of 9)	0	321.103	52	24	85	8	443	48.6	6.65	289.49	24	14	0.274	0.0875345	3.87	162.8	37.2	9.73	94.53	High	High	High	High	High	Not Found	1		3	2	Present Both	1	GLYMA_11G221000	GLYMA_11G221000	sp|P10896|RCA_ARATH	Ribulose bisphosphate carboxylase/oxygenase activase, chloroplastic GN=RCA	ident:358/443 pos:395/443 query:443 hit:474 align:444 bit:732.6	OK	Ribulose bisphosphate carboxylase/oxygenase activase, chloroplastic (RA; RuBisCO activase)	na	RCA_ARATH	P10896	Q39197; Q39198; Q8H172; Q940T8; Q941B7	RCA	na	Arabidopsis thaliana (Mouse-ear cress)	3702
High	Master Protein	GLYMA_18G036400	KOG0651 - 26S proteasome regulatory complex, ATPase RPT4 (1 of 9)	0	218.814	42	18	60	3	443	48.6	7.24	207.38	18	0	0.199	0.0181353	0.78	169	31	43.53		High	High	High	High	Not Found	Not Found	1		3	1	Only Control	1	GLYMA_18G036400	GLYMA_18G036400	sp|P10896|RCA_ARATH	Ribulose bisphosphate carboxylase/oxygenase activase, chloroplastic GN=RCA	ident:359/443 pos:394/443 query:443 hit:474 align:444 bit:734.2	OK	Ribulose bisphosphate carboxylase/oxygenase activase, chloroplastic (RA; RuBisCO activase)	na	RCA_ARATH	P10896	Q39197; Q39198; Q8H172; Q940T8; Q941B7	RCA	na	Arabidopsis thaliana (Mouse-ear cress)	3702
High	Master Protein	GLYMA_04G038600	KOG0963//KOG0978 - Transcription factor/CCAAT displacement protein CDP1 // E3 ubiquitin ligase involved in syntaxin degradation (1 of 2)	0.003	2.166	1	1	3	1	973	106.7	4.84	5.02	1	0	0.891	0.933417	64.11	101.4	98.6	13.12	73.78	High	High	Peak Found	High	Not Found	Peak Found	1		3	2	Present Both	1	GLYMA_04G038600	GLYMA_04G038600	sp|O48724|WEB1_ARATH	Protein WEAK CHLOROPLAST MOVEMENT UNDER BLUE LIGHT 1 GN=WEB1	ident:447/973 pos:540/973 query:973 hit:807 align:660 bit:818.5	Poor_match	Protein WEAK CHLOROPLAST MOVEMENT UNDER BLUE LIGHT 1 (Protein WEB1)	na	WEB1_ARATH	O48724	Q0WQC5	WEB1	na	Arabidopsis thaliana (Mouse-ear cress)	3702
High	Master Protein	GLYMA_06G080100	KOG1003 - Actin filament-coating protein tropomyosin (1 of 28)	0	200.724	34	18	71	18	446	50.8	9.29	220.06	18	0	1.487	0.819947	84.1	88.4	111.6	9.08	80.95	High	High	High	High	High	High	1		3	3	Present Both	1	GLYMA_06G080100	GLYMA_06G080100	sp|F4IJK6|KN14R_ARATH	Kinesin-like protein KIN-14R GN=KIN14R	ident:43/446 pos:84/446 query:446 hit:1083 align:167 bit:35.4	Partial_match_both	Kinesin-like protein KIN-14R	na	KN14R_ARATH	F4IJK6	F4IJK7; Q9ZQ52	KIN14R	na	Arabidopsis thaliana (Mouse-ear cress)	3702
High	Master Protein	GLYMA_07G003500	KOG1457 - RNA binding protein (contains RRM repeats) (1 of 6)	0	15.468	11	3	6	3	350	38.3	7.24	14.46	3	0	0.665	0.768013	20.92	108.5	91.5	16.5	64.22	High	High	Not Found	High	High	Not Found	1		2	2	Present Both	1	GLYMA_07G003500	GLYMA_07G003500	sp|Q8H1S6|RU2B2_ARATH	U2 small nuclear ribonucleoprotein B'' 2 GN=U2B''	ident:23/350 pos:37/350 query:350 hit:229 align:66 bit:42.0	Partial_match_both	U2 small nuclear ribonucleoprotein B'' 2 (U2 snRNP B'' 2)	na	RU2B2_ARATH	Q8H1S6	A8MRK1; F4HNV4; Q8RXP9; Q9LMJ0	OrderedLocusNames=At1g06960	na	Arabidopsis thaliana (Mouse-ear cress)	3702
High	Master Protein	GLYMA_11G037500	KOG1698 - Mitochondrial/chloroplast ribosomal protein L19 (1 of 1)	0	40.229	21	2	3	2	213	23.7	10.02	17.01	2	0	0.01	6.62973e-17		200				High	High	Not Found	Not Found	Not Found	Not Found	1		2	0	Only Control	1	GLYMA_11G037500	GLYMA_11G037500	sp|Q8W463|RK191_ARATH	50S ribosomal protein L19-1, chloroplastic GN=RPL12B	ident:122/213 pos:136/213 query:213 hit:225 align:165 bit:216.1	OK	50S ribosomal protein L19-1, chloroplastic	na	RK191_ARATH	Q8W463	O23597	OrderedLocusNames=At4g17560	na	Arabidopsis thaliana (Mouse-ear cress)	3702
High	Master Protein	GLYMA_11G105500	KOG3130 - Uncharacterized conserved protein (1 of 1)	0	2.833	1	1	4	1	1367	149.2	4.75	7.87	1	0	0.975	0.972386	86.44	101.6	98.4	18.04	83.78	High	High	High	Peak Found	High	Not Found	1		3	2	Present Both	1	GLYMA_11G105500	GLYMA_11G105500	sp|Q9SLF3|TC132_ARATH	Translocase of chloroplast 132, chloroplastic GN=TOC132	ident:631/1367 pos:713/1367 query:1367 hit:1206 align:824 bit:1250.3	Poor_match	Translocase of chloroplast 132, chloroplastic (AtToc132)	132 kDa chloroplast outer envelope protein	TC132_ARATH	Q9SLF3	Q56WJ7; Q8LPK1	TOC132	na	Arabidopsis thaliana (Mouse-ear cress)	3702
High	Master Protein	GLYMA_02G279000	KOG3259 - Peptidyl-prolyl cis-trans isomerase (1 of 1)	0.003	2.474	4	1	2	1	292	32.6	6.68	4.7	1	0	0.462	0.577404	1.86	136.8	63.2	8.29		High	High	Not Found	Peak Found	Not Found	Not Found	1		2	1	Only Control	1	GLYMA_02G279000	GLYMA_02G279000	sp|Q93WI0|STR12_ARATH	Rhodanese-like/PpiC domain-containing protein 12, chloroplastic GN=STL2	ident:139/292 pos:174/292 query:292 hit:299 align:208 bit:302.4	Poor_match	Rhodanese-like/PpiC domain-containing protein 12, chloroplastic	Sulfurtransferase 12 (AtStr12)	STR12_ARATH	Q93WI0	O23727; Q8LCM5	OrderedLocusNames=At5g19370	na	Arabidopsis thaliana (Mouse-ear cress)	3702
High	Master Protein	GLYMA_02G058200	KOG3377 - Uncharacterized conserved protein (1 of 7)	0	55.964	34	4	19	3	151	17.3	6.09	82.72	4	1	1.085	0.978934	87.08	93.8	106.2	38.41	89.91	High	High	High	High	High	High	1	Acetyl [N-Term]	3	3	Present Both	1	GLYMA_02G058200	GLYMA_02G058200	sp|Q948R1|PLA11_ARATH	Phospholipase A(1) DAD1, chloroplastic GN=DAD1	ident:30/151 pos:54/151 query:151 hit:447 align:130 bit:28.1	Partial_match_hit	Phospholipase A(1) DAD1, chloroplastic	Phospholipase A1-Ibeta1; Protein DEFECTIVE IN ANTHER DEHISCENCE 1 (AtDAD1)	PLA11_ARATH	Q948R1	F4IV22; O22170	DAD1	na	Arabidopsis thaliana (Mouse-ear cress)	3702
High	Master Protein	GLYMA_09G035300	KOG3450 - Huntingtin interacting protein HYPK (1 of 4)	0	87.724	78	7	26	5	110	12.2	5.07	96.05	7	2	1.12	0.973365	128.26	60.7	139.3	50.22	72.79	High	High	Peak Found	Peak Found	High	High	1	Acetyl [N-Term]	3	3	Present Both	1	GLYMA_09G035300	GLYMA_09G035300	sp|Q9M3D6|AB19G_ARATH	ABC transporter G family member 19 GN=ABCG19	ident:16/110 pos:26/110 query:110 hit:725 align:51 bit:27.3	Partial_match_both	ABC transporter G family member 19 (ABC transporter ABCG.19; AtABCG19)	White-brown complex homolog protein 19 (AtWBC19)	AB19G_ARATH	Q9M3D6	na	ABCG19	WBC19	Arabidopsis thaliana (Mouse-ear cress)	3702
High	Master Protein	GLYMA_15G139900	KOG3450 - Huntingtin interacting protein HYPK (1 of 4)	0	83.115	44	5	21	3	110	12.2	5.08	96.4	5	0	0.453	0.453106	12.14	150.7	49.3	24.24	111.33	High	High	Not Found	High	High	High	1		2	3	Present Both	1	GLYMA_15G139900	GLYMA_15G139900	sp|Q38932|LCYE_ARATH	Lycopene epsilon cyclase, chloroplastic GN=LUT2	ident:20/110 pos:34/110 query:110 hit:524 align:61 bit:28.9	Partial_match_hit	Lycopene epsilon cyclase, chloroplastic	Protein LUTEIN DEFICIENT 2	LCYE_ARATH	Q38932	Q9LDV8	LUT2	na	Arabidopsis thaliana (Mouse-ear cress)	3702
High	Master Protein	GLYMA_09G152100	KOG3461 - CDGSH-type Zn-finger containing protein (1 of 2)	0	8.745	20	2	5	2	113	12.1	9.25	12.96	2	0	0.73	0.825285	12.64	121	79	38.49	4.11	High	High	Peak Found	High	High	Not Found	1		3	2	Present Both	1	GLYMA_09G152100	GLYMA_09G152100	sp|Q9FLI7|NEET_ARATH	CDGSH iron-sulfur domain-containing protein NEET GN=NEET	ident:62/113 pos:71/113 query:113 hit:108 align:79 bit:130.6	OK	CDGSH iron-sulfur domain-containing protein NEET (At-NEET)	na	NEET_ARATH	Q9FLI7	Q8LCD5	NEET	na	Arabidopsis thaliana (Mouse-ear cress)	3702
High	Master Protein	GLYMA_13G047900	KOG4002 - Uncharacterized integral membrane protein (1 of 1)	0	64.117	15	6	18	2	396	45.8	9.41	55.99	6	4	1.332	0.876018	85.8	81.9	118.1	24.29	126.8	High	High	High	High	High	High	1		3	3	Present Both	1	GLYMA_13G047900	GLYMA_13G047900	sp|O80638|WTR14_ARATH	WAT1-related protein At2g39510 GN=WRKY3	ident:33/396 pos:51/396 query:396 hit:374 align:122 bit:34.7	Partial_match_both	WAT1-related protein At2g39510	na	WTR14_ARATH	O80638	na	OrderedLocusNames=At2g39510	na	Arabidopsis thaliana (Mouse-ear cress)	3702
High	Master Protein	GLYMA_09G177500	KOG4012 - Histone H1 (1 of 1)	0	65.996	15	6	16	6	497	53.4	10.39	52.56	6	0	0.934	0.957402	57.59	121.9	78.1	74.88	107.44	High	High	High	High	High	Peak Found	1		3	3	Present Both	1	GLYMA_09G177500	GLYMA_09G177500	sp|Q43386|HMGYA_ARATH	HMG-Y-related protein A GN=HMGA	ident:34/497 pos:44/497 query:497 hit:204 align:67 bit:73.6	Partial_match_both	HMG-Y-related protein A (AtHMGA)	High mobility group A protein	HMGYA_ARATH	Q43386	P92954; Q8LGC1	HMGA	na	Arabidopsis thaliana (Mouse-ear cress)	3702
High	Master Protein	GLYMA_04G030800	KOG4042 - Dynactin subunit p27/WS-3, involved in transport of organelles along microtubules (1 of 1)	0	359.124	76	23	132	14	276	30	6.71	496.52	23	9	1.144	0.960306	81.5	102.8	97.2	12.93	55.61	High	High	High	High	High	High	1		3	3	Present Both	1	GLYMA_04G030800	GLYMA_04G030800	sp|Q9FWR5|GCA1_ARATH	Gamma carbonic anhydrase 1, mitochondrial GN=GAMMACA1	ident:225/276 pos:245/276 query:276 hit:275 align:269 bit:474.6	OK	Gamma carbonic anhydrase 1, mitochondrial (AtCA1; GAMMA CA1)	na	GCA1_ARATH	Q9FWR5	Q67XH5; Q682H9; Q8LF67; Q9LN36	GAMMACA1	na	Arabidopsis thaliana (Mouse-ear cress)	3702
High	Master Protein	GLYMA_05G051800	KOG4083 - Head-elevated expression protein (1 of 1)	0	72.41	10	3	26	3	168	19.1	8.15	105.16	3	0	1.033	0.99878	84.19	114.5	85.5	21.15	48.41	High	High	High	High	High	High	1		3	3	Present Both	1	GLYMA_05G051800	GLYMA_05G051800	sp|P93004|PIP27_ARATH	Aquaporin PIP2-7 GN=PIP2-7	ident:16/168 pos:24/168 query:168 hit:280 align:44 bit:26.9	Partial_match_both	Aquaporin PIP2-7	Plasma membrane intrinsic protein 2-7 (AtPIP2;7); Plasma membrane intrinsic protein 3; Salt stress-induced major intrinsic protein	PIP27_ARATH	P93004	O22332; O49616	PIP2-7	PIP3; SIMIP	Arabidopsis thaliana (Mouse-ear cress)	3702
High	Master Protein	GLYMA_08G349900	KOG4374 - RNA-binding protein Bicaudal-C (1 of 9)	0	15.2	8	1	1	1	201	22.7	9.57	4.92	1	0	0.985	0.946873	37.7	100.7	99.3	35.85		High	Peak Found	Not Found	Peak Found	Not Found	Not Found	1		2	1	Only Control	1	GLYMA_08G349900	GLYMA_08G349900	sp|Q9LZ86|P2C66_ARATH	Probable protein phosphatase 2C 66 GN=PLL2	ident:22/201 pos:31/201 query:201 hit:674 align:56 bit:30.4	Partial_match_both	Probable protein phosphatase 2C 66 (AtPP2C66)	Protein POLTERGEIST-LIKE 2; Protein phosphatase 2C PLL2 (PP2C PLL2)	P2C66_ARATH	Q9LZ86	na	PLL2	na	Arabidopsis thaliana (Mouse-ear cress)	3702
High	Master Protein	GLYMA_02G029300	KOG4384 - Uncharacterized SAM domain protein (1 of 1)	0	14.926	7	3	13	3	337	37.2	10.49	21.65	3	0	1.005	0.992627	45.87	127.9	72.1	37.27	48.25	High	High	High	High	High	Peak Found	1		3	3	Present Both	1	GLYMA_02G029300	GLYMA_02G029300	sp|F4JRP8|STIL2_ARATH	Protein STICHEL-like 2 GN=TAF13	ident:18/337 pos:27/337 query:337 hit:857 align:54 bit:30.8	Partial_match_both	Protein STICHEL-like 2	na	STIL2_ARATH	F4JRP8	Q9SB72	OrderedLocusNames=At4g24790	na	Arabidopsis thaliana (Mouse-ear cress)	3702
High	Master Protein	GLYMA_02G245500	KOG4467 - Uncharacterized conserved protein (1 of 4)	0	20.93	7	3	4	3	592	66.4	8.5	14.75	3	0	0.285	0.278855	1.48	45.9	154.1	139.11	17.23	High	High	Peak Found	Not Found	High	High	1	Acetyl [N-Term]	3	2	Present Both	1	GLYMA_02G245500	GLYMA_02G245500	sp|Q9C5P0|SUVH8_ARATH	Histone-lysine N-methyltransferase, H3 lysine-9 specific SUVH8 GN=SUVH8	ident:24/592 pos:37/592 query:592 hit:755 align:83 bit:35.0	Partial_match_both	Histone-lysine N-methyltransferase, H3 lysine-9 specific SUVH8	Histone H3-K9 methyltransferase 8 (H3-K9-HMTase 8); Protein SET DOMAIN GROUP 21; Suppressor of variegation 3-9 homolog protein 8 (Su(var)3-9 homolog protein 8)	SUVH8_ARATH	Q9C5P0	Q9TP24	SUVH8	SDG21; SET21	Arabidopsis thaliana (Mouse-ear cress)	3702
High	Master Protein	GLYMA_08G340600	KOG4618 - Uncharacterized conserved protein (1 of 1)	0	3.006	15	1	5	1	71	8.2	9	13.27	1	0	1.019	0.992627	26.15	99.1	100.9	46.92	44.2	High	Peak Found	High	High	High	High	1		3	3	Present Both	1	GLYMA_08G340600	GLYMA_08G340600	sp|Q9CAU0|SCP6_ARATH	Serine carboxypeptidase-like 6 GN=SCPL6	ident:13/71 pos:16/71 query:71 hit:452 align:31 bit:26.2	Partial_match_both	Serine carboxypeptidase-like 6	na	SCP6_ARATH	Q9CAU0	na	SCPL6	na	Arabidopsis thaliana (Mouse-ear cress)	3702
High	Master Protein	GLYMA_02G001300	KOG4702 - Uncharacterized conserved protein (1 of 1)	0	17.807	61	2	5	2	76	8.7	9.47	11.29	2	0	1.065	0.998983	62.16	92.5	107.5	24.05	17.01	High	High	Peak Found	High	High	Not Found	1		3	2	Present Both	1	GLYMA_02G001300	GLYMA_02G001300	sp|Q94A76|GORK_ARATH	Potassium channel GORK GN=GORK	ident:17/76 pos:34/76 query:76 hit:820 align:76 bit:26.9	Partial_match_hit	Potassium channel GORK	Guard cell outward rectifying K(+) channel (AtGORK)	GORK_ARATH	Q94A76	Q9FNY5	GORK	na	Arabidopsis thaliana (Mouse-ear cress)	3702
High	Master Protein	GLYMA_02G237000	PF00069//PF00560//PF08263 - Protein kinase domain (Pkinase) // Leucine Rich Repeat (LRR_1) // Leucine rich repeat N-terminal domain (LRRNT_2) (1 of 39)	0	21.542	5	2	3	2	654	71.6	8.85	9.64	2	0	0.499	0.56478	31.61	109.7	90.3	43.63	101.61	High	Peak Found	Peak Found	Peak Found	Not Found	High	1		3	2	Present Both	1	GLYMA_02G237000	GLYMA_02G237000	sp|Q9LVM0|Y5830_ARATH	Probable inactive receptor kinase At5g58300 GN=CBSDUF5	ident:442/654 pos:521/654 query:654 hit:654 align:644 bit:882.5	OK	Probable inactive receptor kinase At5g58300	na	Y5830_ARATH	Q9LVM0	na	OrderedLocusNames=At5g58300	na	Arabidopsis thaliana (Mouse-ear cress)	3702
High	Master Protein	GLYMA_01G015500	PF00076 - RNA recognition motif. (a.k.a. RRM, RBD, or RNP domain) (RRM_1) (1 of 477)	0	315.458	71	18	85	5	279	29.8	6.4	331.77	18	14	0.758	0.851096	36.65	121.9	78.1	70	48.37	High	High	High	High	High	High	1		3	3	Present Both	1	GLYMA_01G015500	GLYMA_01G015500	sp|Q9LFD5|BPA1_ARATH	Binding partner of ACD11 1 GN=BPA1	ident:150/279 pos:194/279 query:279 hit:259 align:234 bit:298.1	OK	Binding partner of ACD11 1	na	BPA1_ARATH	Q9LFD5	A8MQX8; A8MSB5; C0Z220; Q93Z43	BPA1	na	Arabidopsis thaliana (Mouse-ear cress)	3702
High	Master Protein	GLYMA_09G206900	PF00076 - RNA recognition motif. (a.k.a. RRM, RBD, or RNP domain) (RRM_1) (1 of 477)	0	308.405	73	18	75	5	280	29.8	6.15	282.17	18	0	1.154	0.955906	54.12	84.3	115.7	45.79	104.91	High	High	High	High	High	High	1		3	3	Present Both	1	GLYMA_09G206900	GLYMA_09G206900	sp|Q9LFD5|BPA1_ARATH	Binding partner of ACD11 1 GN=BPA1	ident:152/280 pos:194/280 query:280 hit:259 align:236 bit:302.8	OK	Binding partner of ACD11 1	na	BPA1_ARATH	Q9LFD5	A8MQX8; A8MSB5; C0Z220; Q93Z43	BPA1	na	Arabidopsis thaliana (Mouse-ear cress)	3702
High	Master Protein	GLYMA_12G043000	PF00076 - RNA recognition motif. (a.k.a. RRM, RBD, or RNP domain) (RRM_1) (1 of 477)	0	213.361	68	12	65	7	160	15.8	7.2	235.83	12	7	0.706	0.804759	46.34	104.7	95.3	42.41	57.79	High	High	High	High	High	High	1		3	3	Present Both	1	GLYMA_12G043000	GLYMA_12G043000	sp|Q03250|RBG7_ARATH	Glycine-rich RNA-binding protein 7 GN=RBG7	ident:68/160 pos:78/160 query:160 hit:176 align:85 bit:147.9	Partial_match_hit	Glycine-rich RNA-binding protein 7 (AtGR-RBP7)	AtRBG7; Glycine-rich protein 7 (AtGRP7); Protein COLD, CIRCADIAN RHYTHM, AND RNA BINDING 2 (Protein CCR2)	RBG7_ARATH	Q03250	C0Z304; Q8LEV4; Q94B62	RBG7	CCR2; GR-RBP7; GRP7	Arabidopsis thaliana (Mouse-ear cress)	3702
High	Master Protein	GLYMA_11G117300	PF00076 - RNA recognition motif. (a.k.a. RRM, RBD, or RNP domain) (RRM_1) (1 of 477)	0	161.467	51	10	58	4	171	16.6	5.63	226.61	10	2	1.074	0.986561	74.95	103.9	96.1	57.11	71.27	High	High	High	High	High	High	1		3	3	Present Both	1	GLYMA_11G117300	GLYMA_11G117300	sp|Q03250|RBG7_ARATH	Glycine-rich RNA-binding protein 7 GN=RBG7	ident:70/171 pos:81/171 query:171 hit:176 align:85 bit:154.5	Partial_match_both	Glycine-rich RNA-binding protein 7 (AtGR-RBP7)	AtRBG7; Glycine-rich protein 7 (AtGRP7); Protein COLD, CIRCADIAN RHYTHM, AND RNA BINDING 2 (Protein CCR2)	RBG7_ARATH	Q03250	C0Z304; Q8LEV4; Q94B62	RBG7	CCR2; GR-RBP7; GRP7	Arabidopsis thaliana (Mouse-ear cress)	3702
High	Master Protein	GLYMA_11G117600	PF00076 - RNA recognition motif. (a.k.a. RRM, RBD, or RNP domain) (RRM_1) (1 of 477)	0	122.226	49	9	32	7	170	16.9	8.12	134.09	9	0	0.579	0.657889	20.82	114.2	85.8	28.64	18.48	High	High	High	High	High	Not Found	1		3	2	Present Both	1	GLYMA_11G117600	GLYMA_11G117600	sp|Q03250|RBG7_ARATH	Glycine-rich RNA-binding protein 7 GN=RBG7	ident:66/170 pos:76/170 query:170 hit:176 align:85 bit:142.1	Partial_match_both	Glycine-rich RNA-binding protein 7 (AtGR-RBP7)	AtRBG7; Glycine-rich protein 7 (AtGRP7); Protein COLD, CIRCADIAN RHYTHM, AND RNA BINDING 2 (Protein CCR2)	RBG7_ARATH	Q03250	C0Z304; Q8LEV4; Q94B62	RBG7	CCR2; GR-RBP7; GRP7	Arabidopsis thaliana (Mouse-ear cress)	3702
High	Master Protein	GLYMA_04G012700	PF00076 - RNA recognition motif. (a.k.a. RRM, RBD, or RNP domain) (RRM_1) (1 of 477)	0	67.98	38	5	24	4	185	18	8.12	81.95	5	0	0.747	0.840112	31.06	87.3	112.7	48.97	38.24	High	High	High	High	High	High	1		3	3	Present Both	1	GLYMA_04G012700	GLYMA_04G012700	sp|Q03250|RBG7_ARATH	Glycine-rich RNA-binding protein 7 GN=RBG7	ident:67/185 pos:76/185 query:185 hit:176 align:85 bit:144.1	Partial_match_both	Glycine-rich RNA-binding protein 7 (AtGR-RBP7)	AtRBG7; Glycine-rich protein 7 (AtGRP7); Protein COLD, CIRCADIAN RHYTHM, AND RNA BINDING 2 (Protein CCR2)	RBG7_ARATH	Q03250	C0Z304; Q8LEV4; Q94B62	RBG7	CCR2; GR-RBP7; GRP7	Arabidopsis thaliana (Mouse-ear cress)	3702
High	Master Protein	GLYMA_06G012600	PF00076 - RNA recognition motif. (a.k.a. RRM, RBD, or RNP domain) (RRM_1) (1 of 477)	0	46.86	33	4	12	2	182	17.7	8.12	39.3	4	0	1.025	0.978851	96.04	98.8	101.2	30.4	88.74	High	Peak Found	Not Found	Peak Found	Not Found	High	1		2	2	Present Both	1	GLYMA_06G012600	GLYMA_06G012600	sp|Q03250|RBG7_ARATH	Glycine-rich RNA-binding protein 7 GN=RBG7	ident:66/182 pos:79/182 query:182 hit:176 align:85 bit:146.4	Partial_match_both	Glycine-rich RNA-binding protein 7 (AtGR-RBP7)	AtRBG7; Glycine-rich protein 7 (AtGRP7); Protein COLD, CIRCADIAN RHYTHM, AND RNA BINDING 2 (Protein CCR2)	RBG7_ARATH	Q03250	C0Z304; Q8LEV4; Q94B62	RBG7	CCR2; GR-RBP7; GRP7	Arabidopsis thaliana (Mouse-ear cress)	3702
High	Master Protein	GLYMA_11G255000	PF00076 - RNA recognition motif. (a.k.a. RRM, RBD, or RNP domain) (RRM_1) (1 of 477)	0	40.731	37	4	7	3	138	14.3	8.48	29.01	4	1	0.872	0.923972	47.99	83.4	116.6	39.32	52.44	High	High	Peak Found	High	High	High	1		3	3	Present Both	1	GLYMA_11G255000	GLYMA_11G255000	sp|Q9SVM8|RBG2_ARATH	Glycine-rich RNA-binding protein 2, mitochondrial GN=RBG2	ident:77/138 pos:101/138 query:138 hit:158 align:121 bit:160.2	OK	Glycine-rich RNA-binding protein 2, mitochondrial (AtGR-RBP2)	AtRBG2; Glycine-rich protein 2 (AtGRP2); Mitochondrial RNA-binding protein 1a (At-mRBP1a)	RBG2_ARATH	Q9SVM8	Q39105; Q41988	RBG2	GR-RBP2; GRP2; MRBP1A	Arabidopsis thaliana (Mouse-ear cress)	3702
High	Master Protein	GLYMA_04G015000	PF00083//PF07690 - Sugar (and other) transporter (Sugar_tr) // Major Facilitator Superfamily (MFS_1) (1 of 11)	0	11.87	2	1	3	1	738	78.7	5.72	7	1	0	12.138	0.0192081	47.85	15.2	184.8	2.22	80.08	High	Peak Found	Not Found	High	Peak Found	High	1		2	3	Present Both	1	GLYMA_04G015000	GLYMA_04G015000	sp|Q8LPQ8|MSSP2_ARATH	Monosaccharide-sensing protein 2 GN=MSSP2	ident:531/738 pos:631/738 query:738 hit:729 align:747 bit:989.6	OK	Monosaccharide-sensing protein 2	Sugar transporter MSSP2	MSSP2_ARATH	Q8LPQ8	O65497	MSSP2	na	Arabidopsis thaliana (Mouse-ear cress)	3702
High	Master Protein	GLYMA_04G247900	PF00085//PF13098//PF13848 - Thioredoxin (Thioredoxin) // Thioredoxin-like domain (Thioredoxin_2) // Thioredoxin-like domain (Thioredoxin_6) (1 of 2)	0	379.497	65	35	113	11	525	58.7	5.17	364.18	35	19	1.782	0.686947	125.42	20.1	179.9	138.71	75.52	High	Peak Found	High	High	High	High	1		3	3	Present Both	1	GLYMA_04G247900	GLYMA_04G247900	sp|Q9SRG3|PDI12_ARATH	Protein disulfide isomerase-like 1-2 GN=PDIL1-2	ident:338/525 pos:400/525 query:525 hit:508 align:483 bit:704.1	OK	Protein disulfide isomerase-like 1-2 (AtPDIL1-2)	Protein disulfide-isomerase 2 (PDI 2); Protein disulfide-isomerase 6 (AtPDI6)	PDI12_ARATH	Q9SRG3	Q0WV97	PDIL1-2	PDI6	Arabidopsis thaliana (Mouse-ear cress)	3702
High	Master Protein	GLYMA_02G156800	PF00139 - Legume lectin domain (Lectin_legB) (1 of 90)	0	381.897	68	21	97	21	297	31.9	7.05	417.17	21	0	2.997	0.245162	69.48	99	101	11.44	86.33	High	High	High	High	High	Peak Found	1		3	3	Present Both	1	GLYMA_02G156800	GLYMA_02G156800	sp|Q9LXA5|LRK91_ARATH	L-type lectin-domain containing receptor kinase IX.1 GN=LECRK91	ident:85/297 pos:125/297 query:297 hit:651 align:249 bit:112.1	Partial_match_hit	L-type lectin-domain containing receptor kinase IX.1 (LecRK-IX.1)	na	LRK91_ARATH	Q9LXA5	na	LECRK91	na	Arabidopsis thaliana (Mouse-ear cress)	3702
High	Master Protein	GLYMA_09G134500	PF00168 - C2 domain (C2) (1 of 196)	0	55.249	16	5	24	5	281	30.3	5.03	79.99	5	0	0.361	0.250013	6.13	117.8	82.2	78.65	59.63	High	High	High	High	High	High	1		3	3	Present Both	1	GLYMA_09G134500	GLYMA_09G134500	sp|O04023|SRC2_ARATH	Protein SRC2 homolog GN=SRC2	ident:65/281 pos:99/281 query:281 hit:324 align:236 bit:46.2	Poor_match	Protein SRC2 homolog (AtSRC2)	na	SRC2_ARATH	O04023	O81814	SRC2	na	Arabidopsis thaliana (Mouse-ear cress)	3702
High	Master Protein	GLYMA_15G152900	PF00168 - C2 domain (C2) (1 of 196)	0	34.315	22	8	18	8	286	30.6	7.65	36.61	8	0	0.734	0.828905	54.74	166.6	33.4	56.8	60.01	High	High	Peak Found	High	Peak Found	High	1		3	3	Present Both	1	GLYMA_15G152900	GLYMA_15G152900	sp|O04023|SRC2_ARATH	Protein SRC2 homolog GN=SRC2	ident:118/286 pos:155/286 query:286 hit:324 align:290 bit:167.2	Poor_match	Protein SRC2 homolog (AtSRC2)	na	SRC2_ARATH	O04023	O81814	SRC2	na	Arabidopsis thaliana (Mouse-ear cress)	3702
High	Master Protein	GLYMA_01G180400	PF00188//PF14009 - Cysteine-rich secretory protein family (CAP) // Domain of unknown function (DUF4228) (DUF4228) (1 of 1)	0	19.139	9	3	9	3	275	30	7.2	27.08	3	0	0.818	0.880798	16.57	108.5	91.5	10.07	34.72	High	High	High	High	Peak Found	Not Found	1		3	2	Present Both	1	GLYMA_01G180400	GLYMA_01G180400	sp|Q9ZNS4|PRB1_ARATH	Pathogenesis-related protein 1 GN=PRB1	ident:52/275 pos:68/275 query:275 hit:161 align:132 bit:75.9	Partial_match_query	Pathogenesis-related protein 1 (AtPRB1)	na	PRB1_ARATH	Q9ZNS4	na	PRB1	na	Arabidopsis thaliana (Mouse-ear cress)	3702
High	Master Protein	GLYMA_01G132500	PF00234 - Protease inhibitor/seed storage/LTP family (Tryp_alpha_amyl) (1 of 30)	0	34.696	17	2	10	2	118	11.8	8.9	41.36	2	0	3.023	0.238585	41.19	63.1	136.9	23.06	48.5	High	High	High	High	High	Not Found	1		3	2	Present Both	1	GLYMA_01G132500	GLYMA_01G132500	sp|Q9LLR6|NLTP4_ARATH	Non-specific lipid-transfer protein 4 GN=LTP4	ident:64/118 pos:74/118 query:118 hit:112 align:110 bit:114.0	OK	Non-specific lipid-transfer protein 4 (LTP 4)	na	NLTP4_ARATH	Q9LLR6	Q9FIE7	LTP4	na	Arabidopsis thaliana (Mouse-ear cress)	3702
High	Master Protein	GLYMA_03G040100	PF00234 - Protease inhibitor/seed storage/LTP family (Tryp_alpha_amyl) (1 of 30)	0	33.932	17	1	7	1	122	12.2	8.78	35.23	1	0	1.364	0.866034	54.44	82.1	117.9	18.74		High	High	Not Found	High	Not Found	Not Found	1		2	1	Only Control	1	GLYMA_03G040100	GLYMA_03G040100	sp|Q42589|NLTP1_ARATH	Non-specific lipid-transfer protein 1 GN=LTP1	ident:60/122 pos:84/122 query:122 hit:118 align:119 bit:111.7	Poor_match	Non-specific lipid-transfer protein 1 (LTP 1)	na	NLTP1_ARATH	Q42589	na	LTP1	na	Arabidopsis thaliana (Mouse-ear cress)	3702
High	Master Protein	GLYMA_01G130000	PF00234 - Protease inhibitor/seed storage/LTP family (Tryp_alpha_amyl) (1 of 30)	0	15.2	17	1	5	1	119	12.6	9.76	24.4	1	0	0.624	0.733061	1.94	123.2	76.8	4.74		High	High	Not Found	High	Not Found	Not Found	1		2	1	Only Control	1	GLYMA_01G130000	GLYMA_01G130000	sp|Q9LLR7|NLTP3_ARATH	Non-specific lipid-transfer protein 3 GN=LTP3	ident:57/119 pos:73/119 query:119 hit:115 align:114 bit:108.2	Poor_match	Non-specific lipid-transfer protein 3 (LTP 3)	na	NLTP3_ARATH	Q9LLR7	Q8L9A3; Q9FIE6	LTP3	na	Arabidopsis thaliana (Mouse-ear cress)	3702
Medium	Master Protein	GLYMA_04G009400	PF00257 - Dehydrin (Dehydrin) (1 of 7)	0.013	1.632	4	1	4	1	214	24.2	5.77	5.7	1	0	1.51	0.840112	103.89	79.7	120.3	9.6	84.85	High	High	Not Found	High	Not Found	High	1		2	2	Present Both	1	GLYMA_04G009400	GLYMA_04G009400	sp|P31168|COR47_ARATH	Dehydrin COR47 GN=COR47	ident:99/214 pos:134/214 query:214 hit:265 align:232 bit:92.0	Poor_match	Dehydrin COR47	Cold-induced COR47 protein	COR47_ARATH	P31168	Q39059	COR47	RD17	Arabidopsis thaliana (Mouse-ear cress)	3702
High	Master Protein	GLYMA_12G064300	PF00314 - Thaumatin family (Thaumatin) (1 of 61)	0	91.328	12	3	51	3	248	26.2	7.85	199.81	3	0	0.778	0.862164	61.06	117.9	82.1	26.07	86.43	High	High	High	High	High	High	1		3	3	Present Both	1	GLYMA_12G064300	GLYMA_12G064300	sp|P50699|TLPH_ARATH	Thaumatin-like protein GN=TIR	ident:101/248 pos:133/248 query:248 hit:243 align:225 bit:185.7	Poor_match	Thaumatin-like protein	na	TLPH_ARATH	P50699	Q9LM26	OrderedLocusNames=At1g18250	na	Arabidopsis thaliana (Mouse-ear cress)	3702
High	Master Protein	GLYMA_06G097600	PF00515 - Tetratricopeptide repeat (TPR_1) (1 of 67)	0	58.835	30	6	13	6	222	24.2	9.09	69.63	6	0	1.06	0.992627	73.52	73.1	126.9	15.43	138.33	High	High	High	High	High	High	1		3	3	Present Both	1	GLYMA_06G097600	GLYMA_06G097600	sp|B9DHG0|PYG7_ARATH	Tetratricopeptide repeat domain-containing protein PYG7, chloroplastic GN=PYG7	ident:20/222 pos:28/222 query:222 hit:301 align:56 bit:35.4	Partial_match_both	Tetratricopeptide repeat domain-containing protein PYG7, chloroplastic	Protein PALE YELLOW GREEN 7	PYG7_ARATH	B9DHG0	O80551; Q8LFF4; Q94EJ1	PYG7	na	Arabidopsis thaliana (Mouse-ear cress)	3702
High	Master Protein	GLYMA_17G084300	PF00581 - Rhodanese-like domain (Rhodanese) (1 of 30)	0	88.221	28	7	19	4	397	41.8	9.39	75.62	7	1	0.546	0.606615	18.38	154.5	45.5	33.12	93.62	High	High	High	High	High	Not Found	1		3	2	Present Both	1	GLYMA_17G084300	GLYMA_17G084300	sp|Q9FN48|CAS_ARATH	Calcium sensing receptor, chloroplastic GN=CAS	ident:268/397 pos:330/397 query:397 hit:387 align:398 bit:545.4	OK	Calcium sensing receptor, chloroplastic	Sulfurtransferase 3 (AtStr3)	CAS_ARATH	Q9FN48	na	CAS	STR3	Arabidopsis thaliana (Mouse-ear cress)	3702
High	Master Protein	GLYMA_05G016000	PF00581 - Rhodanese-like domain (Rhodanese) (1 of 30)	0	46.752	24	5	9	2	396	41.7	9.26	30.82	5	0	0.01	6.62973e-17		200		0.64		High	High	Not Found	Not Found	Not Found	Not Found	1		2	0	Only Control	1	GLYMA_05G016000	GLYMA_05G016000	sp|Q9FN48|CAS_ARATH	Calcium sensing receptor, chloroplastic GN=CAS	ident:268/396 pos:324/396 query:396 hit:387 align:393 bit:534.6	OK	Calcium sensing receptor, chloroplastic	Sulfurtransferase 3 (AtStr3)	CAS_ARATH	Q9FN48	na	CAS	STR3	Arabidopsis thaliana (Mouse-ear cress)	3702
High	Master Protein	GLYMA_11G134900	PF00582 - Universal stress protein family (Usp) (1 of 74)	0	136.379	36	8	44	5	164	17.7	6	154.66	8	5	0.78	0.864277	30.59	102.6	97.4	19.58	39.77	High	High	High	High	High	High	1		3	3	Present Both	1	GLYMA_11G134900	GLYMA_11G134900	sp|Q8VYN9|PHO32_ARATH	Universal stress protein PHOS32 GN=PHOS32	ident:47/164 pos:78/164 query:164 hit:242 align:150 bit:64.3	Poor_match	Universal stress protein PHOS32	Phosphorylated protein of 32 kDa (AtPHOS32)	PHO32_ARATH	Q8VYN9	Q9LSR2	PHOS32	na	Arabidopsis thaliana (Mouse-ear cress)	3702
High	Master Protein	GLYMA_12G058500	PF00582 - Universal stress protein family (Usp) (1 of 74)	0	115.724	52	7	31	4	164	17.9	5.91	101.48	7	0	0.696	0.799527	15.56	121.8	78.2	19.14	73.52	High	High	High	High	High	High	1		3	3	Present Both	1	GLYMA_12G058500	GLYMA_12G058500	sp|Q8VYN9|PHO32_ARATH	Universal stress protein PHOS32 GN=PHOS32	ident:46/164 pos:80/164 query:164 hit:242 align:153 bit:62.4	Poor_match	Universal stress protein PHOS32	Phosphorylated protein of 32 kDa (AtPHOS32)	PHO32_ARATH	Q8VYN9	Q9LSR2	PHOS32	na	Arabidopsis thaliana (Mouse-ear cress)	3702
High	Master Protein	GLYMA_04G107900	PF00582 - Universal stress protein family (Usp) (1 of 74)	0	7.227	10	2	9	1	167	18.7	5.96	15.35	2	0	0.754	0.854204	17.45	114.9	85.1	19.28	90.8	High	High	High	High	High	High	1		3	3	Present Both	1	GLYMA_04G107900	GLYMA_04G107900	sp|Q8LGG8|USPAL_ARATH	Universal stress protein A-like protein GN=URH2	ident:42/167 pos:79/167 query:167 hit:175 align:158 bit:62.0	Poor_match	Universal stress protein A-like protein	na	USPAL_ARATH	Q8LGG8	Q940U0; Q9SSA2	OrderedLocusNames=At3g01520	na	Arabidopsis thaliana (Mouse-ear cress)	3702
High	Master Protein	GLYMA_01G192300	PF00651//PF03000 - BTB/POZ domain (BTB) // NPH3 family (NPH3) (1 of 40)	0	4.145	1	1	3	1	618	68.9	7.39	4	1	0	0.449	0.526541	3.34	138.1	61.9	15.72		High	High	Not Found	High	Not Found	Not Found	1		2	1	Only Control	1	GLYMA_01G192300	GLYMA_01G192300	sp|Q66GP0|SR1P1_ARATH	BTB/POZ domain-containing protein SR1IP1 GN=SR1IP1	ident:419/618 pos:499/618 query:618 hit:604 align:616 bit:822.4	OK	BTB/POZ domain-containing protein SR1IP1	Protein ATSR1-INTERACTION PROTEIN 1	SR1P1_ARATH	Q66GP0	F4K3Q2	SR1IP1	na	Arabidopsis thaliana (Mouse-ear cress)	3702
High	Master Protein	GLYMA_11G030700	PF00805 - Pentapeptide repeats (8 copies) (Pentapeptide) (1 of 6)	0	269.251	52	16	87	16	266	28.3	7.39	347.48	16	0	0.896	0.942237	42.06	97.2	102.8	6.71	85.31	High	High	High	High	High	Peak Found	1		3	3	Present Both	1	GLYMA_11G030700	GLYMA_11G030700	sp|Q8H1Q1|TL203_ARATH	Thylakoid lumenal protein TL20.3, chloroplastic GN=TL20.3	ident:197/266 pos:228/266 query:266 hit:280 align:280 bit:362.5	OK	Thylakoid lumenal protein TL20.3, chloroplastic	na	TL203_ARATH	Q8H1Q1	Q94C72; Q9FWX1	TL20.3	na	Arabidopsis thaliana (Mouse-ear cress)	3702
Medium	Master Protein	GLYMA_08G123500	PF00931//PF07714//PF13855 - NB-ARC domain (NB-ARC) // Protein tyrosine kinase (Pkinase_Tyr) // Leucine rich repeat (LRR_8) (1 of 1)	0.018	1.355	1	1	5	1	1355	154.5	6.8	0	1	0	1.629	0.817898	129.29	76.1	123.9	138.31	54.6	High	Peak Found	High	High	High	High	1		3	3	Present Both	1	GLYMA_08G123500.3.p	GLYMA_08G123500.3.p	sp|Q9FM85|PBL16_ARATH	Probable serine/threonine-protein kinase PBL16 GN=PBL16	ident:252/1355 pos:294/1355 query:1355 hit:408 align:353 bit:509.2	Partial_match_query	Probable serine/threonine-protein kinase PBL16	PBS1-like protein 16	PBL16_ARATH	Q9FM85	na	PBL16	na	Arabidopsis thaliana (Mouse-ear cress)	3702
High	Master Protein	GLYMA_04G154300	PF01429 - Methyl-CpG binding domain (MBD) (1 of 21)	0	15.2	6	1	4	1	332	37.9	5.66	15.87	1	0	1.698	0.804759	19.73	74.1	125.9	15.98	4.02	High	High	Peak Found	High	High	Not Found	1		3	2	Present Both	1	GLYMA_04G154300	GLYMA_04G154300	sp|Q9XI36|MBD10_ARATH	Methyl-CpG-binding domain-containing protein 10 GN=MBD10	ident:57/332 pos:74/332 query:332 hit:384 align:97 bit:125.2	Partial_match_both	Methyl-CpG-binding domain-containing protein 10 (AtMBD10; MBD10)	Methyl-CpG-binding protein MBD10	MBD10_ARATH	Q9XI36	Q0WLE9	MBD10	na	Arabidopsis thaliana (Mouse-ear cress)	3702
High	Master Protein	GLYMA_03G230300	PF01789 - PsbP (PsbP) (1 of 26)	0	94.5	50	9	35	9	258	29.3	7.43	111	9	0	0.41	0.348033	8.72	176	24	78.58	102.72	High	High	High	High	High	Not Found	1		3	2	Present Both	1	GLYMA_03G230300	GLYMA_03G230300	sp|O23403|PPD1_ARATH	PsbP domain-containing protein 1, chloroplastic GN=PPD1	ident:158/258 pos:188/258 query:258 hit:287 align:225 bit:315.8	OK	PsbP domain-containing protein 1, chloroplastic	OEC23-like protein 3; PsbP-related thylakoid lumenal protein 1	PPD1_ARATH	O23403	Q3EA17; Q681Q6; Q8LF71	PPD1	na	Arabidopsis thaliana (Mouse-ear cress)	3702
High	Master Protein	GLYMA_17G101100	PF01844 - HNH endonuclease (HNH) (1 of 6)	0	10.864	21	2	3	2	207	22.9	9.58	10.04	2	0	0.925	0.950435	14.64	103.9	96.1	18.11	15.96	High	High	Not Found	High	Peak Found	Not Found	1		2	2	Present Both	1	GLYMA_17G101100	GLYMA_17G101100	sp|Q8LPR8|TI100_ARATH	Protein TIC 100 GN=TIC100	ident:19/207 pos:23/207 query:207 hit:871 align:55 bit:29.3	Partial_match_both	Protein TIC 100	Protein EMBRYO DEFECTIVE 1211; Translocon at the inner envelope membrane of chloroplasts 100 (AtTIC100)	TI100_ARATH	Q8LPR8	Q9FNJ7	TIC100	na	Arabidopsis thaliana (Mouse-ear cress)	3702
High	Master Protein	GLYMA_U043500	PF02178 - AT hook motif (AT_hook) (1 of 2)	0	37.544	25	4	16	4	240	25.7	10.17	46.8	4	0	0.685	0.792914	41.27	153.9	46.1	70.91	98.48	High	High	High	High	High	High	1		3	3	Present Both	1	GLYMA_U043500	GLYMA_U043500	sp|P26569|H12_ARATH	Histone H1.2 GN=GPT2	ident:34/240 pos:44/240 query:240 hit:273 align:71 bit:60.5	Partial_match_both	Histone H1.2	na	H12_ARATH	P26569	na	OrderedLocusNames=At2g30620	na	Arabidopsis thaliana (Mouse-ear cress)	3702
High	Master Protein	GLYMA_11G187900	PF02238 - Cytochrome c oxidase subunit VIIa (COX7a) (1 of 3)	0	394.39	84	8	196	8	67	7.6	9.92	884.13	8	0	1.318	0.879779	96.78	84.3	115.7	30.39	27.44	High	High	High	High	High	High	1		3	3	Present Both	1	GLYMA_11G187900	GLYMA_11G187900	sp|Q9C994|DTX14_ARATH	Protein DETOXIFICATION 14 GN=DTX14	ident:13/67 pos:23/67 query:67 hit:485 align:45 bit:26.6	Partial_match_hit	Protein DETOXIFICATION 14 (AtDTX14)	Multidrug and toxic compound extrusion protein 14 (MATE protein 14)	DTX14_ARATH	Q9C994	na	DTX14	na	Arabidopsis thaliana (Mouse-ear cress)	3702
High	Master Protein	GLYMA_08G161600	PF03080//PF14365 - Domain of unknown function (DUF239) (DUF239) // Domain of unknown function (DUF4409) (DUF4409) (1 of 25)	0	3.828	2	1	5	1	486	54.3	8.07	4.45	1	0	0.795	0.870724	40.43	111.4	88.6	9.91	106.25	High	High	High	Peak Found	High	High	1		3	3	Present Both	1	GLYMA_08G161600	GLYMA_08G161600	sp|Q8VZJ9|CRCK2_ARATH	Calmodulin-binding receptor-like cytoplasmic kinase 2 GN=CRCK2	ident:41/486 pos:71/486 query:486 hit:411 align:178 bit:34.3	Partial_match_both	Calmodulin-binding receptor-like cytoplasmic kinase 2	na	CRCK2_ARATH	Q8VZJ9	O23069	CRCK2	na	Arabidopsis thaliana (Mouse-ear cress)	3702
High	Master Protein	GLYMA_13G327800	PF03094//PF03911 - Mlo family (Mlo) // Sec61beta family (Sec61_beta) (1 of 2)	0	49.113	10	4	15	3	539	61.3	10.45	60.8	4	1	2.091	0.559386	77.03	64.2	135.8	16.72	110.74	High	High	High	High	High	High	1		3	3	Present Both	1	GLYMA_13G327800	GLYMA_13G327800	sp|Q94KB7|MLO6_ARATH	MLO-like protein 6 GN=MLO6	ident:281/539 pos:337/539 query:539 hit:583 align:447 bit:583.2	OK	MLO-like protein 6 (AtMlo6)	na	MLO6_ARATH	Q94KB7	Q9SY94	MLO6	na	Arabidopsis thaliana (Mouse-ear cress)	3702
High	Master Protein	GLYMA_02G277300	PF03168 - Late embryogenesis abundant protein (LEA_2) (1 of 105)	0	50.136	17	4	11	4	321	35.8	5.02	36.88	4	0	2.595	0.359525	51.62	137.4	62.6	1.22	133.92	High	High	Not Found	High	Not Found	High	1		2	2	Present Both	1	GLYMA_02G277300	GLYMA_02G277300	sp|O03983|LEA14_ARATH	Probable desiccation-related protein LEA14 GN=LEA14	ident:42/321 pos:72/321 query:321 hit:151 align:150 bit:72.0	Partial_match_query	Probable desiccation-related protein LEA14	na	LEA14_ARATH	O03983	Q42314	LEA14	na	Arabidopsis thaliana (Mouse-ear cress)	3702
High	Master Protein	GLYMA_03G228200	PF03489//PF05184//PF14543 - Saposin-like type B, region 2 (SapB_2) // Saposin-like type B, region 1 (SapB_1) // Xylanase inhibitor N-terminal (TAXi_N) (1 of 1)	0	20.607	6	2	6	1	508	55.3	6.73	16.56	2	0	0.01	6.62973e-17		200		19.46		High	High	Peak Found	Not Found	Not Found	High	1		3	1	Only Control	1	GLYMA_03G228200	GLYMA_03G228200	sp|O65390|APA1_ARATH	Aspartic proteinase A1 GN=APA1	ident:298/508 pos:363/508 query:508 hit:506 align:505 bit:609.0	OK	Aspartic proteinase A1	na	APA1_ARATH	O65390	Q38934	APA1	PRA1	Arabidopsis thaliana (Mouse-ear cress)	3702
High	Master Protein	GLYMA_05G027400	PF03634 - TCP family transcription factor (TCP) (1 of 56)	0	3.909	3	1	1	1	416	44.9	7.33	1.75	1	0	0.01	6.62973e-17		200		5.92		High	Peak Found	Not Found	Not Found	Not Found	Not Found	1		2	0	Only Control	1	GLYMA_05G027400	GLYMA_05G027400	sp|Q93Z00|TCP14_ARATH	Transcription factor TCP14 GN=TCP14	ident:183/416 pos:221/416 query:416 hit:489 align:409 bit:201.8	Poor_match	Transcription factor TCP14 (AtTCP14)	na	TCP14_ARATH	Q93Z00	Q9SN76	TCP14	na	Arabidopsis thaliana (Mouse-ear cress)	3702
High	Master Protein	GLYMA_07G073100	PF03766 - Remorin, N-terminal region (Remorin_N) (1 of 8)	0	250.663	66	19	70	11	198	21.6	8.43	221.12	19	8	1.214	0.937997	98.1	109	91	19.23	151.97	High	High	High	High	High	High	1		3	3	Present Both	1	GLYMA_07G073100	GLYMA_07G073100	sp|Q9M2D8|Y3126_ARATH	Uncharacterized protein At3g61260 GN=CBSDUF4	ident:104/198 pos:128/198 query:198 hit:212 align:159 bit:198.7	OK	Uncharacterized protein At3g61260	na	Y3126_ARATH	Q9M2D8	na	OrderedLocusNames=At3g61260	na	Arabidopsis thaliana (Mouse-ear cress)	3702
High	Master Protein	GLYMA_16G189500	PF03766 - Remorin, N-terminal region (Remorin_N) (1 of 8)	0	150.903	56	14	46	5	205	22.3	5.82	144.25	14	9	0.826	0.890792	46.63	105.8	94.2	10.7	77.28	High	High	High	High	Peak Found	High	1		3	3	Present Both	1	GLYMA_16G189500	GLYMA_16G189500	sp|Q9M2D8|Y3126_ARATH	Uncharacterized protein At3g61260 GN=CBSDUF4	ident:115/205 pos:134/205 query:205 hit:212 align:168 bit:205.3	OK	Uncharacterized protein At3g61260	na	Y3126_ARATH	Q9M2D8	na	OrderedLocusNames=At3g61260	na	Arabidopsis thaliana (Mouse-ear cress)	3702
High	Master Protein	GLYMA_09G139200	PF03766 - Remorin, N-terminal region (Remorin_N) (1 of 8)	0	148.379	55	13	46	4	206	22.5	5.82	136.88	13	0	0.516	0.597969	10.66	150.4	49.6	80.57	83.85	High	High	High	High	Peak Found	High	1		3	3	Present Both	1	GLYMA_09G139200	GLYMA_09G139200	sp|Q9M2D8|Y3126_ARATH	Uncharacterized protein At3g61260 GN=CBSDUF4	ident:113/206 pos:132/206 query:206 hit:212 align:168 bit:203.0	OK	Uncharacterized protein At3g61260	na	Y3126_ARATH	Q9M2D8	na	OrderedLocusNames=At3g61260	na	Arabidopsis thaliana (Mouse-ear cress)	3702
High	Master Protein	GLYMA_10G236300	PF03766 - Remorin, N-terminal region (Remorin_N) (1 of 8)	0	45.653	46	7	14	4	194	21.5	5.83	36.11	7	0	1.35	0.870724	113.38	131.2	68.8	18.6	133.33	High	High	Peak Found	High	Peak Found	High	1		3	3	Present Both	1	GLYMA_10G236300	GLYMA_10G236300	sp|Q9FFA5|RMR14_ARATH	Remorin 1.4 GN=REM1.4	ident:128/194 pos:148/194 query:194 hit:202 align:208 bit:204.9	OK	Remorin 1.4 (AtREM1.4)	Remorin group 1 member 4	RMR14_ARATH	Q9FFA5	F4KEA0; Q8LC13	REM1.4	na	Arabidopsis thaliana (Mouse-ear cress)	3702
High	Master Protein	GLYMA_05G154700	PF04398 - Protein of unknown function, DUF538 (DUF538) (1 of 41)	0	4.582	6	1	3	1	175	19.6	6.13	7.12	1	0	1.954	0.612053	165.16	67.7	132.3	105.24		High	High	Not Found	High	Not Found	Not Found	1		2	1	Only Control	1	GLYMA_05G154700	GLYMA_05G154700	sp|Q9M015|Y5161_ARATH	Uncharacterized protein At5g01610 GN=CBSCBSPB1	ident:28/175 pos:55/175 query:175 hit:170 align:98 bit:52.8	Poor_match	Uncharacterized protein At5g01610	na	Y5161_ARATH	Q9M015	Q0WT00; Q84VV4	OrderedLocusNames=At5g01610	na	Arabidopsis thaliana (Mouse-ear cress)	3702
High	Master Protein	GLYMA_08G185800	PF04755 - PAP_fibrillin (PAP_fibrillin) (1 of 23)	0	180.531	64	15	55	4	242	27.2	9.42	187.97	15	9	0.503	0.541715	14.7	136.6	63.4	30.78	80.39	High	High	High	High	High	Not Found	1		3	2	Present Both	1	GLYMA_08G185800	GLYMA_08G185800	sp|Q9LU85|PAP4_ARATH	Probable plastid-lipid-associated protein 4, chloroplastic GN=PAP4	ident:127/242 pos:154/242 query:242 hit:242 align:187 bit:268.9	OK	Probable plastid-lipid-associated protein 4, chloroplastic	Fibrillin-3a; Plastoglobulin 25 (AtPGL25)	PAP4_ARATH	Q9LU85	Q8W4A9	PAP4	FBN3a; FIB3a; PGL25	Arabidopsis thaliana (Mouse-ear cress)	3702
High	Master Protein	GLYMA_15G047000	PF04755 - PAP_fibrillin (PAP_fibrillin) (1 of 23)	0	148.135	63	14	54	3	245	27.7	9.36	170.83	14	0	0.292	0.116388	4.18	169.1	30.9	71.82	54.55	High	High	High	High	High	Not Found	1		3	2	Present Both	1	GLYMA_15G047000	GLYMA_15G047000	sp|Q9LU85|PAP4_ARATH	Probable plastid-lipid-associated protein 4, chloroplastic GN=PAP4	ident:139/245 pos:173/245 query:245 hit:242 align:249 bit:268.1	OK	Probable plastid-lipid-associated protein 4, chloroplastic	Fibrillin-3a; Plastoglobulin 25 (AtPGL25)	PAP4_ARATH	Q9LU85	Q8W4A9	PAP4	FBN3a; FIB3a; PGL25	Arabidopsis thaliana (Mouse-ear cress)	3702
High	Master Protein	GLYMA_20G207100	PF04755 - PAP_fibrillin (PAP_fibrillin) (1 of 23)	0	5.033	5	1	3	1	265	28.4	8.15	6.39	1	0	0.549	0.700985	6.34	129.1	70.9	19.85		High	High	Not Found	High	Not Found	Not Found	1		2	1	Only Control	1	GLYMA_20G207100	GLYMA_20G207100	sp|Q9LW57|PAP6_ARATH	Plastid-lipid-associated protein 6, chloroplastic GN=PAP6	ident:142/265 pos:165/265 query:265 hit:284 align:188 bit:303.1	OK	Plastid-lipid-associated protein 6, chloroplastic	Fibrillin-4; Fibrillin-6; Harpin-binding protein 1 (HrBP1); Plastoglobulin 30.4 (AtPGL30.4)	PAP6_ARATH	Q9LW57	Q8LBY7	PAP6	na	Arabidopsis thaliana (Mouse-ear cress)	3702
High	Master Protein	GLYMA_11G181400	PF05450 - Nicastrin (Nicastrin) (1 of 3)	0	26.871	9	4	10	4	562	62.6	6.58	24.29	4	0	1.773	0.69129	111.16	142.5	57.5	1.61	127.99	High	High	Not Found	High	Peak Found	High	1		2	3	Present Both	1	GLYMA_11G181400	GLYMA_11G181400	sp|Q8GUM5|NICA_ARATH	Nicastrin GN=NHX4	ident:39/562 pos:65/562 query:562 hit:676 align:163 bit:34.7	Partial_match_both	Nicastrin	na	NICA_ARATH	Q8GUM5	Q9LXJ9; Q9LXK0	OrderedLocusNames=At3g52640/At3g52650	na	Arabidopsis thaliana (Mouse-ear cress)	3702
High	Master Protein	GLYMA_10G256000	PF05479 - Photosystem I reaction centre subunit N (PSAN or PSI-N) (PsaN) (1 of 3)	0	75.982	29	6	20	6	136	15.4	9.67	63.02	6	0	0.276	0.0916384	3.34	165.7	34.3	81.45	24.09	High	High	High	High	High	Not Found	1		3	2	Present Both	1	GLYMA_10G256000	GLYMA_10G256000	sp|P49107|PSAN_ARATH	Photosystem I reaction center subunit N, chloroplastic GN=PSAN	ident:19/136 pos:35/136 query:136 hit:171 align:67 bit:32.3	Partial_match_both	Photosystem I reaction center subunit N, chloroplastic (PSI-N)	na	PSAN_ARATH	P49107	Q2V2V9	PSAN	na	Arabidopsis thaliana (Mouse-ear cress)	3702
High	Master Protein	GLYMA_15G154700	PF05558 - DREPP plasma membrane polypeptide (DREPP) (1 of 2)	0	90.726	39	8	15	8	218	24.3	5.05	56.44	8	0	1.898	0.634892	133.45	119.7	80.3	21.39	166.05	High	High	Peak Found	Peak Found	Peak Found	High	1		3	3	Present Both	1	GLYMA_15G154700	GLYMA_15G154700	sp|Q96262|PCAP1_ARATH	Plasma membrane-associated cation-binding protein 1 GN=PCAP1	ident:115/218 pos:131/218 query:218 hit:225 align:181 bit:171.8	OK	Plasma membrane-associated cation-binding protein 1 (AtPCAP1)	Microtubule-destabilizing protein 25	PCAP1_ARATH	Q96262	F4JUT4; Q56YV4; Q8H7H8; Q8LDH5	PCAP1	MDP25	Arabidopsis thaliana (Mouse-ear cress)	3702
High	Master Protein	GLYMA_15G076500	PF05564 - Dormancy/auxin associated protein (Auxin_repressed) (1 of 8)	0	40.78	41	3	6	2	120	13.3	8.81	19.13	3	0	1.187	0.972386	0	91.4	108.6			High	High	Not Found	High	Not Found	Peak Found	1		2	2	Present Both	1	GLYMA_15G076500	GLYMA_15G076500	sp|B9DGG8|DRM1_ARATH	Dormancy-associated protein 1 GN=DRM1	ident:72/120 pos:90/120 query:120 hit:132 align:112 bit:118.6	OK	Dormancy-associated protein 1 (AtDRM1)	Dormancy-associated protein-like 1 (AtDYL1)	DRM1_ARATH	B9DGG8	F4HWK7; F4HWK9; O65923	DRM1	na	Arabidopsis thaliana (Mouse-ear cress)	3702
High	Master Protein	GLYMA_13G237000	PF05564 - Dormancy/auxin associated protein (Auxin_repressed) (1 of 8)	0	38.149	34	2	5	1	117	12.9	9.76	21.57	2	0	0.01	6.62973e-17		200		2.91		High	High	Not Found	Not Found	Not Found	Not Found	1		2	0	Only Control	1	GLYMA_13G237000	GLYMA_13G237000	sp|Q9FKV8|DRMH2_ARATH	Dormancy-associated protein homolog 2 GN=DRMH2	ident:69/117 pos:84/117 query:117 hit:114 align:123 bit:127.9	OK	Dormancy-associated protein homolog 2	DRM1 homolog 2; Dormancy/auxin associated family protein	DRMH2_ARATH	Q9FKV8	Q8L9R9	DRMH2	na	Arabidopsis thaliana (Mouse-ear cress)	3702
High	Master Protein	GLYMA_18G075900	PF05627 - Cleavage site for pathogenic type III effector avirulence factor Avr (AvrRpt-cleavage) (1 of 25)	0	15.2	27	1	4	1	79	8.6	7.97	23.62	1	0	2.094	0.732224	149.44	64.6	135.4	15.04	105.55	High	High	Not Found	High	Not Found	High	1		2	2	Present Both	1	GLYMA_18G075900	GLYMA_18G075900	sp|O22633|NOI4_ARATH	Protein NOI4 GN=NOI4	ident:55/79 pos:61/79 query:79 hit:79 align:79 bit:113.2	OK	Protein NOI4	Protein DiDi 18T-1d	NOI4_ARATH	O22633	F4K693; F4K694; Q9M3R9	NOI4	na	Arabidopsis thaliana (Mouse-ear cress)	3702
High	Master Protein	GLYMA_09G222500	PF05680 - ATP synthase E chain (ATP-synt_E) (1 of 2)	0	12.232	26	1	7	1	53	5.7	10.17	22.7	1	0	1.228	0.926521	62.34	89.8	110.2	29.31	68.89	High	High	High	High	High	High	1		3	3	Present Both	1	GLYMA_09G222500	GLYMA_09G222500	sp|Q58P71|CHX8_ARATH	Cation/H(+) antiporter 8 GN=CHX8	ident:12/53 pos:18/53 query:53 hit:816 align:28 bit:25.0	Partial_match_hit	Cation/H(+) antiporter 8	Protein CATION/H+ EXCHANGER 8 (AtCHX8)	CHX8_ARATH	Q58P71	F4IHR1; Q9ZUW0	CHX8	CHX08	Arabidopsis thaliana (Mouse-ear cress)	3702
High	Master Protein	GLYMA_12G036000	PF05680 - ATP synthase E chain (ATP-synt_E) (1 of 2)	0	11.036	26	1	9	1	53	5.6	10.17	29.56	1	0	1.384	0.861974	49.41	83.9	116.1	25.75	76.59	High	High	High	High	High	High	1		3	3	Present Both	1	GLYMA_12G036000	GLYMA_12G036000	sp|Q58P71|CHX8_ARATH	Cation/H(+) antiporter 8 GN=CHX8	ident:12/53 pos:18/53 query:53 hit:816 align:28 bit:25.0	Partial_match_hit	Cation/H(+) antiporter 8	Protein CATION/H+ EXCHANGER 8 (AtCHX8)	CHX8_ARATH	Q58P71	F4IHR1; Q9ZUW0	CHX8	CHX08	Arabidopsis thaliana (Mouse-ear cress)	3702
High	Master Protein	GLYMA_15G008800	PF06232 - Embryo-specific protein 3, (ATS3) (ATS3) (1 of 9)	0	28.903	24	3	6	3	170	19.3	4.93	17.78	3	0	0.974	0.972386	81.37	105.5	94.5	44.22	71.6	High	High	Peak Found	High	High	High	1		3	3	Present Both	1	GLYMA_15G008800	GLYMA_15G008800	sp|Q6NPM5|ATS3B_ARATH	Embryo-specific protein ATS3B GN=ATS3B	ident:87/170 pos:109/170 query:170 hit:190 align:169 bit:174.9	OK	Embryo-specific protein ATS3B	Protein ARABIDOPSIS THALIANA SEED 3B	ATS3B_ARATH	Q6NPM5	Q680D1; Q9LVB6	ATS3B	na	Arabidopsis thaliana (Mouse-ear cress)	3702
High	Master Protein	GLYMA_06G186900	PF06522 - NADH-ubiquinone reductase complex 1 MLRQ subunit (B12D) (1 of 6)	0	113.208	49	7	27	1	84	9.5	8.02	133.57	7	0	1.594	0.807637	18.45	16.6	183.4	17.47	32.82	High	High	Not Found	High	Not Found	High	1		2	2	Present Both	1	GLYMA_06G186900	GLYMA_06G186900	sp|Q9LZP3|PP293_ARATH	Pentatricopeptide repeat-containing protein At3g62470, mitochondrial GN=PCMP-H80	ident:14/84 pos:21/84 query:84 hit:599 align:43 bit:28.1	Partial_match_hit	Pentatricopeptide repeat-containing protein At3g62470, mitochondrial	na	PP293_ARATH	Q9LZP3	na	OrderedLocusNames=At3g62470	na	Arabidopsis thaliana (Mouse-ear cress)	3702
High	Master Protein	GLYMA_06G204200	PF06549 - Protein of unknown function (DUF1118) (DUF1118) (1 of 4)	0	36.509	15	4	18	4	214	22.7	9.72	48.03	4	0	0.861	0.91329	69.5	125.6	74.4	12.97	62.76	High	High	High	High	High	Peak Found	1		3	3	Present Both	1	GLYMA_06G204200	GLYMA_06G204200	sp|Q9FLW9|PKP2_ARATH	Plastidial pyruvate kinase 2 GN=PKP2	ident:11/214 pos:21/214 query:214 hit:579 align:34 bit:29.3	Partial_match_both	Plastidial pyruvate kinase 2 (PKp2)	Plastidial pyruvate kinase 1 (PKP1); Pyruvate kinase III; Pyruvate kinase isozyme B1, chloroplastic (PKP-BETA1; Plastidic pyruvate kinase beta subunit 1)	PKP2_ARATH	Q9FLW9	Q56XD5; Q56ZT8; Q570A3; Q94AG4	PKP2	PKP1	Arabidopsis thaliana (Mouse-ear cress)	3702
High	Master Protein	GLYMA_09G271500	PF06697 - Protein of unknown function (DUF1191) (DUF1191) (1 of 14)	0	23.809	9	3	4	3	327	35.4	7.84	13.85	3	0	5.716	0.146631	27.8	17	183	26.07		High	Peak Found	Not Found	High	Not Found	High	1		2	2	Present Both	1	GLYMA_09G271500	GLYMA_09G271500	sp|Q9FLW0|Y5241_ARATH	Probable receptor-like protein kinase At5g24010 GN=CBSCBSPB4	ident:16/327 pos:20/327 query:327 hit:824 align:31 bit:36.2	Partial_match_both	Probable receptor-like protein kinase At5g24010	na	Y5241_ARATH	Q9FLW0	Q8RXW4	OrderedLocusNames=At5g24010	na	Arabidopsis thaliana (Mouse-ear cress)	3702
High	Master Protein	GLYMA_11G017800	PF07078 - Forty-two-three protein (FYTT) (1 of 1)	0	17.295	19	3	4	3	202	23	11.74	9.33	3	0	2.022	0.671207	0	66.2	133.8			High	Peak Found	Peak Found	High	High	Peak Found	1		3	3	Present Both	1	GLYMA_11G017800	GLYMA_11G017800	sp|F4IE66|PRP22_ARATH	Pre-mRNA-splicing factor ATP-dependent RNA helicase DEAH10 GN=RID1	ident:17/202 pos:25/202 query:202 hit:717 align:49 bit:28.1	Partial_match_both	Pre-mRNA-splicing factor ATP-dependent RNA helicase DEAH10	DEAH RNA helicase homolog PRP22; Protein ROOT INITIATION DEFECTIVE 1	PRP22_ARATH	F4IE66	Q9FZC3	RID1	na	Arabidopsis thaliana (Mouse-ear cress)	3702
High	Master Protein	GLYMA_14G052000	PF07172 - Glycine rich protein family (GRP) (1 of 12)	0	33.169	40	1	12	1	131	12.8	7.78	102.11	1	0	0.906	0.948143	25.04	110.4	89.6	27.1	16.21	High	High	High	High	High	Not Found	1		3	2	Present Both	1	GLYMA_14G052000	GLYMA_14G052000	sp|Q9FL76|EXP24_ARATH	Expansin-A24 GN=EXPA24	ident:42/131 pos:52/131 query:131 hit:312 align:122 bit:33.1	Partial_match_hit	Expansin-A24 (AtEXPA24)	Alpha-expansin-24 (At-EXP24; AtEx24); Ath-ExpAlpha-1.19	EXP24_ARATH	Q9FL76	F4KEE0; Q4PSD6	EXPA24	EXP24	Arabidopsis thaliana (Mouse-ear cress)	3702
High	Master Protein	GLYMA_03G023900	PF07386 - Protein of unknown function (DUF1499) (DUF1499) (1 of 5)	0	28.545	19	3	10	3	236	26.8	8.84	24.84	3	0	0.404	0.334521	7.21	151.7	48.3	30.68	23.04	High	High	High	High	High	High	1		3	3	Present Both	1	GLYMA_03G023900	GLYMA_03G023900	sp|Q9CAN9|ERF26_ARATH	Ethylene-responsive transcription factor ERF026 GN=ERF026	ident:12/236 pos:20/236 query:236 hit:248 align:32 bit:28.5	Partial_match_both	Ethylene-responsive transcription factor ERF026	na	ERF26_ARATH	Q9CAN9	Q9LQ01	ERF026	na	Arabidopsis thaliana (Mouse-ear cress)	3702
High	Master Protein	GLYMA_19G242800	PF07466 - Protein of unknown function (DUF1517) (DUF1517) (1 of 6)	0	6.501	3	1	2	1	378	41	9.07	6.87	1	0	0.256	0.198367	0.26	159.2	40.8	3.8		High	High	Not Found	Peak Found	Not Found	Not Found	1		2	1	Only Control	1	GLYMA_19G242800	GLYMA_19G242800	sp|Q9FL42|ATL69_ARATH	Putative RING-H2 finger protein ATL69 GN=ATL69	ident:19/378 pos:36/378 query:378 hit:159 align:72 bit:30.4	Partial_match_both	Putative RING-H2 finger protein ATL69	RING-type E3 ubiquitin transferase ATL69	ATL69_ARATH	Q9FL42	na	ATL69	na	Arabidopsis thaliana (Mouse-ear cress)	3702
High	Master Protein	GLYMA_08G348200	PF08186 - Wound-inducible basic protein family (Wound_ind) (1 of 2)	0	26.1	35	2	21	2	60	6.8	9.2	59.22	2	0	0.929	0.954322	66.8	118	82	55.61	71.27	High	High	High	High	High	High	1		3	3	Present Both	1	GLYMA_08G348200	GLYMA_08G348200	sp|Q9FG93|MNS4_ARATH	Alpha-mannosidase I MNS4 GN=MNS4	ident:16/60 pos:27/60 query:60 hit:624 align:53 bit:25.4	Partial_match_hit	Alpha-mannosidase I MNS4	na	MNS4_ARATH	Q9FG93	na	MNS4	na	Arabidopsis thaliana (Mouse-ear cress)	3702
High	Master Protein	GLYMA_19G233100	PF10333 - GPI-Mannosyltransferase II co-activator (Pga1) (1 of 1)	0	14.14	10	2	6	2	235	26.7	8.24	14.23	2	0	1.856	0.742474	66.58	89.8	110.2	34.64	66.88	High	High	Peak Found	High	Peak Found	High	1		3	3	Present Both	1	GLYMA_19G233100	GLYMA_19G233100	sp|F4HSQ2|SBT51_ARATH	Subtilisin-like protease SBT5.1 GN=SBT5.1	ident:19/235 pos:31/235 query:235 hit:780 align:64 bit:28.1	Partial_match_both	Subtilisin-like protease SBT5.1	Subtilase subfamily 5 member 1 (AtSBT5.1)	SBT51_ARATH	F4HSQ2	Q9LNU0	SBT5.1	na	Arabidopsis thaliana (Mouse-ear cress)	3702
High	Master Protein	GLYMA_06G118000	PF10664 - Cyanobacterial and plastid NDH-1 subunit M (NdhM) (1 of 2)	0	40.521	12	2	7	1	218	25.3	5.71	21.18	2	2	0.702	0.807539	23.4	137.9	62.1	2.49	49.75	High	High	Not Found	Not Found	Not Found	Not Found	1		2	0	Only Control	1	GLYMA_06G118000	GLYMA_06G118000	sp|Q2V2S7|NDHM_ARATH	NAD(P)H-quinone oxidoreductase subunit M, chloroplastic GN=ndhM	ident:134/218 pos:164/218 query:218 hit:217 align:212 bit:270.8	OK	NAD(P)H-quinone oxidoreductase subunit M, chloroplastic	NAD(P)H dehydrogenase subunit M (NDH subunit M; NDH-M); NADH-plastoquinone oxidoreductase subunit M	NDHM_ARATH	Q2V2S7	Q0WUL4; Q9SZJ4	ndhM	na	Arabidopsis thaliana (Mouse-ear cress)	3702
High	Master Protein	GLYMA_18G049400	PF10674 - Protein of unknown function (DUF2488) (Ycf54) (1 of 2)	0	264.119	56	14	81	6	234	26.7	6.42	325.71	14	11	0.737	0.832193	24.66	125.1	74.9	8.25	91.1	High	High	High	High	High	Not Found	1		3	2	Present Both	1	GLYMA_18G049400	GLYMA_18G049400	sp|Q9SVL0|ZHD7_ARATH	Zinc-finger homeodomain protein 7 GN=ZHD7	ident:11/234 pos:15/234 query:234 hit:249 align:24 bit:29.6	Partial_match_both	Zinc-finger homeodomain protein 7 (AtZHD7)	Homeobox protein 28 (AtHB-28)	ZHD7_ARATH	Q9SVL0	Q8LDG1	ZHD7	HB28	Arabidopsis thaliana (Mouse-ear cress)	3702
High	Master Protein	GLYMA_11G201500	PF10674 - Protein of unknown function (DUF2488) (Ycf54) (1 of 2)	0	209.829	44	11	64	3	234	26.7	6.8	216.45	11	0	1.039	0.998965	82.65	98.7	101.3	11.83	74.56	High	High	High	High	High	Peak Found	1		3	3	Present Both	1	GLYMA_11G201500	GLYMA_11G201500	sp|Q9SVL0|ZHD7_ARATH	Zinc-finger homeodomain protein 7 GN=ZHD7	ident:14/234 pos:20/234 query:234 hit:249 align:38 bit:31.6	Partial_match_both	Zinc-finger homeodomain protein 7 (AtZHD7)	Homeobox protein 28 (AtHB-28)	ZHD7_ARATH	Q9SVL0	Q8LDG1	ZHD7	HB28	Arabidopsis thaliana (Mouse-ear cress)	3702
High	Master Protein	GLYMA_15G116500	PF10785 - NADH-ubiquinone oxidoreductase complex I, 21 kDa subunit (NADH-u_ox-rdase) (1 of 2)	0	149.23	96	6	38	6	101	11	9.35	146.71	6	0	1.734	0.710088	62.15	82.5	117.5	17.94	124.14	High	High	High	High	High	High	1	Acetyl [N-Term]	3	3	Present Both	1	GLYMA_15G116500	GLYMA_15G116500	sp|Q9SCU0|SDR2A_ARATH	Short-chain dehydrogenase reductase 2a GN=SDR2a	ident:22/101 pos:37/101 query:101 hit:303 align:73 bit:28.1	Partial_match_hit	Short-chain dehydrogenase reductase 2a (AtSDR2a)	na	SDR2A_ARATH	Q9SCU0	na	SDR2a	SDR2	Arabidopsis thaliana (Mouse-ear cress)	3702
High	Master Protein	GLYMA_14G206700	PF10890 - Protein of unknown function (DUF2741) (DUF2741) (1 of 2)	0	44.052	72	4	38	4	72	8.3	9.66	95.29	4	0	1.481	0.820822	46.54	62.4	137.6	40.48	69.18	High	High	High	High	High	High	1		3	3	Present Both	1	GLYMA_14G206700	GLYMA_14G206700	sp|Q1EBV7|BASS2_ARATH	Sodium/pyruvate cotransporter BASS2, chloroplastic GN=BASS2	ident:17/72 pos:29/72 query:72 hit:409 align:55 bit:29.3	Partial_match_hit	Sodium/pyruvate cotransporter BASS2, chloroplastic	Bile acid transporter 1; Bile acid-sodium symporter family protein 2	BASS2_ARATH	Q1EBV7	O81017; Q84WD8; Q8S2V7	BASS2	BAT1; SBF1	Arabidopsis thaliana (Mouse-ear cress)	3702
High	Master Protein	GLYMA_11G176000	PF11493 - Thylakoid soluble phosphoprotein TSP9 (TSP9) (1 of 2)	0	59.632	48	7	14	2	92	9.5	9.85	52.48	7	5	0.413	0.357894	11.33	150.9	49.1	65.96	109.52	High	High	High	High	High	Not Found	1		3	2	Present Both	1	GLYMA_11G176000	GLYMA_11G176000	sp|Q8RWL4|IDM2_ARATH	Increased DNA methylation 2 GN=IDM2	ident:16/92 pos:22/92 query:92 hit:349 align:42 bit:28.9	Partial_match_both	Increased DNA methylation 2	Alpha-crystallin domain-containing protein 39.4 (AtAcd39.4); Protein ROS5; Repressor of silencing 5	IDM2_ARATH	Q8RWL4	F4HYL2; Q9ZVL2	IDM2	na	Arabidopsis thaliana (Mouse-ear cress)	3702
High	Master Protein	GLYMA_18G065900	PF11493 - Thylakoid soluble phosphoprotein TSP9 (TSP9) (1 of 2)	0	37.953	39	6	9	1	112	11.8	9.31	28.81	6	0	0.01	6.62973e-17		200		52.37		High	High	High	High	Not Found	Not Found	1		3	1	Only Control	1	GLYMA_18G065900	GLYMA_18G065900	sp|F4IUG9|MYO13_ARATH	Myosin-13 GN=XI-G	ident:19/112 pos:36/112 query:112 hit:1493 align:77 bit:27.7	Partial_match_hit	Myosin-13	Myosin XI G (AtXIG)	MYO13_ARATH	F4IUG9	Q9SK73	XI-G	XIG	Arabidopsis thaliana (Mouse-ear cress)	3702
High	Master Protein	GLYMA_07G075100	PF11623 - Protein of unknown function (DUF3252) (DUF3252) (1 of 2)	0	27.183	24	4	10	4	243	26.6	9.01	28	4	0	0.485	0.514591	3.17	149.1	50.9	57.93	60.66	High	High	Peak Found	High	High	Not Found	1		3	2	Present Both	1	GLYMA_07G075100	GLYMA_07G075100	sp|Q9T0A4|NDHS_ARATH	NAD(P)H-quinone oxidoreductase subunit S, chloroplastic GN=ndhS	ident:137/243 pos:175/243 query:243 hit:250 align:250 bit:253.1	OK	NAD(P)H-quinone oxidoreductase subunit S, chloroplastic	NAD(P)H dehydrogenase subunit S (NDH subunit S); NADH-plastoquinone oxidoreductase subunit S; Protein CHLORORESPIRATORY REDUCTION 31	NDHS_ARATH	Q9T0A4	Q93Z46	ndhS	na	Arabidopsis thaliana (Mouse-ear cress)	3702
High	Master Protein	GLYMA_02G050600	PF11833 - Protein of unknown function (DUF3353) (DUF3353) (1 of 7)	0	64.02	18	5	17	5	281	31.4	10.08	63.48	5	0	0.415	0.36147	22.11	152.1	47.9	58.6	29.68	High	High	High	High	High	High	1		3	3	Present Both	1	GLYMA_02G050600	GLYMA_02G050600	sp|Q9FN50|CPP1_ARATH	Protein CHAPERONE-LIKE PROTEIN OF POR1, chloroplastic GN=CPP1	ident:92/281 pos:146/281 query:281 hit:258 align:240 bit:166.0	Poor_match	Protein CHAPERONE-LIKE PROTEIN OF POR1, chloroplastic (AtCPP1)	Protein CELL GROWTH DEFECT FACTOR 1 (AtCDF1)	CPP1_ARATH	Q9FN50	na	CPP1	na	Arabidopsis thaliana (Mouse-ear cress)	3702
High	Master Protein	GLYMA_05G016100	PF11833 - Protein of unknown function (DUF3353) (DUF3353) (1 of 7)	0	16.237	15	4	13	2	251	28.3	9.88	34.25	4	2	0.498	0.536656	16.26	148.1	51.9	42.61	44.76	High	High	High	High	High	Not Found	1		3	2	Present Both	1	GLYMA_05G016100	GLYMA_05G016100	sp|Q9FN50|CPP1_ARATH	Protein CHAPERONE-LIKE PROTEIN OF POR1, chloroplastic GN=CPP1	ident:168/251 pos:193/251 query:251 hit:258 align:226 bit:355.1	OK	Protein CHAPERONE-LIKE PROTEIN OF POR1, chloroplastic (AtCPP1)	Protein CELL GROWTH DEFECT FACTOR 1 (AtCDF1)	CPP1_ARATH	Q9FN50	na	CPP1	na	Arabidopsis thaliana (Mouse-ear cress)	3702
High	Master Protein	GLYMA_20G106600	PF11833 - Protein of unknown function (DUF3353) (DUF3353) (1 of 7)	0	8.494	5	1	3	1	310	32.7	9.1	8.92	1	0	0.398	0.322338	4.61	143.1	56.9	14.24	67.44	High	High	High	Peak Found	Peak Found	Peak Found	1		3	3	Present Both	1	GLYMA_20G106600	GLYMA_20G106600	sp|Q9FN50|CPP1_ARATH	Protein CHAPERONE-LIKE PROTEIN OF POR1, chloroplastic GN=CPP1	ident:48/310 pos:83/310 query:310 hit:258 align:175 bit:66.6	Poor_match	Protein CHAPERONE-LIKE PROTEIN OF POR1, chloroplastic (AtCPP1)	Protein CELL GROWTH DEFECT FACTOR 1 (AtCDF1)	CPP1_ARATH	Q9FN50	na	CPP1	na	Arabidopsis thaliana (Mouse-ear cress)	3702
High	Master Protein	GLYMA_09G227100	PF11891 - Domain of unknown function (DUF3411) (DUF3411) (1 of 19)	0	9.832	5	2	7	1	376	40.1	8.9	18.35	2	0	0.522	0.657889	1.12	131.4	68.6	3.91		High	High	Not Found	High	Not Found	Not Found	1		2	1	Only Control	1	GLYMA_09G227100	GLYMA_09G227100	sp|Q94CJ5|RER4_ARATH	Protein RETICULATA-RELATED 4, chloroplastic GN=RER4	ident:218/376 pos:256/376 query:376 hit:386 align:289 bit:468.0	OK	Protein RETICULATA-RELATED 4, chloroplastic	na	RER4_ARATH	Q94CJ5	Q67YD5	RER4	na	Arabidopsis thaliana (Mouse-ear cress)	3702
High	Master Protein	GLYMA_15G047200	PF11891 - Domain of unknown function (DUF3411) (DUF3411) (1 of 19)	0	9.667	2	1	5	1	523	57.6	8.5	15.98	1	0	0.803	0.87386	20.52	110.9	89.1	33.17	3.6	High	High	High	High	High	Not Found	1		3	2	Present Both	1	GLYMA_15G047200	GLYMA_15G047200	sp|Q8RWG3|RER6_ARATH	Protein RETICULATA-RELATED 6, chloroplastic GN=RER6	ident:72/523 pos:115/523 query:523 hit:745 align:252 bit:94.4	Partial_match_both	Protein RETICULATA-RELATED 6, chloroplastic	na	RER6_ARATH	Q8RWG3	Q9LYM7	RER6	na	Arabidopsis thaliana (Mouse-ear cress)	3702
High	Master Protein	GLYMA_06G153400	PF11910 - Cyanobacterial and plant NDH-1 subunit O (NdhO) (1 of 1)	0	84.759	71	8	38	8	154	17.2	9.22	121.85	8	0	0.466	0.481329	11.11	138.4	61.6	6.72	36.6	High	High	High	High	High	Peak Found	1		3	3	Present Both	1	GLYMA_06G153400	GLYMA_06G153400	sp|Q9S829|NDHO_ARATH	NAD(P)H-quinone oxidoreductase subunit O, chloroplastic GN=ndhO	ident:99/154 pos:121/154 query:154 hit:158 align:159 bit:188.0	OK	NAD(P)H-quinone oxidoreductase subunit O, chloroplastic	NAD(P)H dehydrogenase subunit O (NDH subunit O; NDH-O); NADH-plastoquinone oxidoreductase subunit O	NDHO_ARATH	Q9S829	na	ndhO	na	Arabidopsis thaliana (Mouse-ear cress)	3702
High	Master Protein	GLYMA_20G176400	PF13414 - TPR repeat (TPR_11) (1 of 152)	0	58.312	15	5	15	5	357	39.7	9.29	52.28	5	0	0.733	0.827412	36.37	138.5	61.5	34.84	76.12	High	High	High	High	High	Not Found	1		3	2	Present Both	1	GLYMA_20G176400	GLYMA_20G176400	sp|B9DHG0|PYG7_ARATH	Tetratricopeptide repeat domain-containing protein PYG7, chloroplastic GN=PYG7	ident:166/357 pos:187/357 query:357 hit:301 align:221 bit:317.0	Poor_match	Tetratricopeptide repeat domain-containing protein PYG7, chloroplastic	Protein PALE YELLOW GREEN 7	PYG7_ARATH	B9DHG0	O80551; Q8LFF4; Q94EJ1	PYG7	na	Arabidopsis thaliana (Mouse-ear cress)	3702
High	Master Protein	GLYMA_19G109000	PF14200 - Ricin-type beta-trefoil lectin domain-like (RicinB_lectin_2) (1 of 3)	0	333.163	38	15	108	7	326	36.3	7.09	454.66	15	10	1.496	0.816344	54.2	80.6	119.4	14.54	29.68	High	High	High	High	High	High	1		3	3	Present Both	1	GLYMA_19G109000	GLYMA_19G109000	sp|Q945P1|EULS3_ARATH	Ricin B-like lectin EULS3 GN=EULS3	ident:156/326 pos:193/326 query:326 hit:317 align:317 bit:263.5	Poor_match	Ricin B-like lectin EULS3	Euonymus lectin S3 (AtEULS3)	EULS3_ARATH	Q945P1	Q9ZV03	EULS3	na	Arabidopsis thaliana (Mouse-ear cress)	3702
High	Master Protein	GLYMA_01G124200	PF14237 - Domain of unknown function (DUF4339) (DUF4339) (1 of 6)	0	26.216	6	4	9	4	525	61.2	6.24	21.44	4	0	0.769	0.854204	17.14	150.2	49.8	55.85	16.57	High	High	Not Found	High	Peak Found	High	1		2	3	Present Both	1	GLYMA_01G124200	GLYMA_01G124200	sp|Q7Y1W1|TIC56_ARATH	Protein TIC 56, chloroplastic GN=TIC56	ident:323/525 pos:405/525 query:525 hit:527 align:495 bit:685.6	OK	Protein TIC 56, chloroplastic	Translocon at the inner envelope membrane of chloroplasts 56 (AtTIC56)	TIC56_ARATH	Q7Y1W1	Q7Y1Z4; Q9M016	TIC56	na	Arabidopsis thaliana (Mouse-ear cress)	3702
High	Master Protein	GLYMA_01G245600	PF14308 - X-domain of DnaJ-containing (DnaJ-X) (1 of 6)	0	14.342	10	1	5	1	173	19.2	6.58	22.06	1	0	1.329	0.918711	98.57	85.9	114.1	14.84	76.89	High	High	Not Found	High	High	Peak Found	1		2	3	Present Both	1	GLYMA_01G245600	GLYMA_01G245600	sp|Q8GYX8|DNJ10_ARATH	Chaperone protein dnaJ 10 GN=ATJ10	ident:104/173 pos:129/173 query:173 hit:398 align:175 bit:172.2	Partial_match_hit	Chaperone protein dnaJ 10 (AtDjC10; AtJ10)	na	DNJ10_ARATH	Q8GYX8	O04662; Q9SRE3	ATJ10	C10; J10	Arabidopsis thaliana (Mouse-ear cress)	3702
High	Master Protein	GLYMA_05G002200	PF14368 - Probable lipid transfer (LTP_2) (1 of 113)	0	12.061	14	1	2	1	100	10.8	8.59	5.97	1	0	0.247	0.111012	0	160.4	39.6			High	Not Found	Not Found	Not Found	Peak Found	Not Found	1		1	1	Missing Both	1	GLYMA_05G002200	GLYMA_05G002200	sp|Q9FFY3|VAS_ARATH	Lipid transfer-like protein VAS GN=VAS	ident:19/100 pos:35/100 query:100 hit:151 align:74 bit:31.6	Partial_match_hit	Lipid transfer-like protein VAS	na	VAS_ARATH	Q9FFY3	na	VAS	na	Arabidopsis thaliana (Mouse-ear cress)	3702
Medium	Master Protein	GLYMA_16G067700	PF14576//PF14577 - Sieve element occlusion N-terminus (SEO_N) // Sieve element occlusion C-terminus (SEO_C) (1 of 21)	0.027	1.207	3	1	3	1	727	83.6	6.47	0	1	0	0.481	0.545566	12.4	136.3	63.7	18.47	49.31	High	Peak Found	High	High	Peak Found	Not Found	1		3	2	Present Both	1	GLYMA_16G067700	GLYMA_16G067700	sp|Q9SS87|SEOB_ARATH	Protein SIEVE ELEMENT OCCLUSION B GN=SEOB	ident:330/727 pos:473/727 query:727 hit:740 align:728 bit:649.0	Poor_match	Protein SIEVE ELEMENT OCCLUSION B (AtSEOb)	Protein SIEVE ELEMENT OCCLUSION-RELATED 1 (AtSEOR1)	SEOB_ARATH	Q9SS87	na	SEOB	na	Arabidopsis thaliana (Mouse-ear cress)	3702
High	Master Protein	GLYMA_05G184800	PF15704 - Mitochondrial ATP synthase subunit (Mt_ATP_synt) (1 of 3)	0	997.198	83	44	387	6	241	27.5	6.44	1587.77	44	41	1.224	0.930375	75.65	99.9	100.1	27.49	45.72	High	High	High	High	High	High	1		3	3	Present Both	1	GLYMA_05G184800	GLYMA_05G184800	sp|Q9SJ12|ATP7_ARATH	Probable ATP synthase 24 kDa subunit, mitochondrial GN=ATL77	ident:169/241 pos:205/241 query:241 hit:240 align:241 bit:342.4	OK	Probable ATP synthase 24 kDa subunit, mitochondrial	na	ATP7_ARATH	Q9SJ12	Q8LBN3	OrderedLocusNames=At2g21870	na	Arabidopsis thaliana (Mouse-ear cress)	3702
High	Master Protein	GLYMA_08G142800	PF15704 - Mitochondrial ATP synthase subunit (Mt_ATP_synt) (1 of 3)	0	944.517	83	43	374	5	241	27.5	6.84	1523.06	43	0	1.132	0.963193	83.27	79.2	120.8	9.62	33.6	High	High	High	High	High	High	1		3	3	Present Both	1	GLYMA_08G142800	GLYMA_08G142800	sp|Q9SJ12|ATP7_ARATH	Probable ATP synthase 24 kDa subunit, mitochondrial GN=ATL77	ident:164/241 pos:205/241 query:241 hit:240 align:241 bit:337.0	OK	Probable ATP synthase 24 kDa subunit, mitochondrial	na	ATP7_ARATH	Q9SJ12	Q8LBN3	OrderedLocusNames=At2g21870	na	Arabidopsis thaliana (Mouse-ear cress)	3702
High	Master Protein	GLYMA_03G098200	PF16029 - Domain of unknown function (DUF4787) (DUF4787) (1 of 2)	0	5.947	9	1	3	1	121	13.6	6.51	6.41	1	0	1.058	0.992627	105.56	108	92	21.5	100.64	High	High	Peak Found	Peak Found	High	Peak Found	1		3	3	Present Both	1	GLYMA_03G098200	GLYMA_03G098200	sp|Q9LZ00|MED4_ARATH	Mediator of RNA polymerase II transcription subunit 4 GN=MED4	ident:11/121 pos:16/121 query:121 hit:426 align:23 bit:28.5	Partial_match_both	Mediator of RNA polymerase II transcription subunit 4	na	MED4_ARATH	Q9LZ00	Q7Y210	MED4	MED4_1	Arabidopsis thaliana (Mouse-ear cress)	3702
High	Master Protein	GLYMA_11G099300	PF16320 - Ribosomal protein L7/L12 dimerisation domain (Ribosomal_L12_N) (1 of 2)	0	200.794	59	16	78	4	233	24.8	7.65	304.5	16	11	0.837	0.895655	41.58	115.2	84.8	21.9	88.92	High	High	Not Found	Peak Found	High	Not Found	1		2	2	Present Both	1	GLYMA_11G099300	GLYMA_11G099300	sp|P36210|RK121_ARATH	50S ribosomal protein L12-1, chloroplastic GN=RPL12A	ident:125/233 pos:151/233 query:233 hit:191 align:198 bit:193.7	OK	50S ribosomal protein L12-1, chloroplastic	CL12-A	RK121_ARATH	P36210	na	RPL12A	na	Arabidopsis thaliana (Mouse-ear cress)	3702
High	Master Protein	GLYMA_12G025400	PF16320 - Ribosomal protein L7/L12 dimerisation domain (Ribosomal_L12_N) (1 of 2)	0	169.023	57	13	73	1	190	20	5.68	280.71	13	0	0.01	6.62973e-17		200		0.02		High	Peak Found	Not Found	Not Found	Not Found	Not Found	1		2	0	Only Control	1	GLYMA_12G025400	GLYMA_12G025400	sp|P36212|RK123_ARATH	50S ribosomal protein L12-3, chloroplastic GN=RPL12C	ident:119/190 pos:144/190 query:190 hit:187 align:195 bit:193.0	OK	50S ribosomal protein L12-3, chloroplastic	CL12-C	RK123_ARATH	P36212	Q9LK92	RPL12C	na	Arabidopsis thaliana (Mouse-ear cress)	3702
High	Master Protein	GLYMA_14G201500	PF16940 - Chloroplast envelope transporter (Tic110) (1 of 4)	0	175.78	17	14	65	5	996	109.8	6.19	246.78	14	0	0.935	0.957558	86.5	132.2	67.8	23.25	77.27	High	High	High	High	High	High	1		3	3	Present Both	1	GLYMA_14G201500	GLYMA_14G201500	sp|Q8LPR9|TI110_ARATH	Protein TIC110, chloroplastic GN=TIC110	ident:697/996 pos:841/996 query:996 hit:1016 align:1004 bit:1397.9	OK	Protein TIC110, chloroplastic	Translocon at the inner envelope membrane of chloroplasts 110 (AtTIC110)	TI110_ARATH	Q8LPR9	Q0WMF8; Q8LPG5; Q9LMI9; Q9M9Z7	TIC110	na	Arabidopsis thaliana (Mouse-ear cress)	3702
High	Master Protein	GLYMA_02G233700	PF16940 - Chloroplast envelope transporter (Tic110) (1 of 4)	0	170.221	19	15	72	6	995	109.9	6.33	268.75	15	9	0.815	0.879779	49.9	125.8	74.2	3.61	49.28	High	High	High	High	High	High	1		3	3	Present Both	1	GLYMA_02G233700	GLYMA_02G233700	sp|Q8LPR9|TI110_ARATH	Protein TIC110, chloroplastic GN=TIC110	ident:689/995 pos:832/995 query:995 hit:1016 align:1004 bit:1379.8	OK	Protein TIC110, chloroplastic	Translocon at the inner envelope membrane of chloroplasts 110 (AtTIC110)	TI110_ARATH	Q8LPR9	Q0WMF8; Q8LPG5; Q9LMI9; Q9M9Z7	TIC110	na	Arabidopsis thaliana (Mouse-ear cress)	3702
High	Master Protein	GLYMA_11G192700	PTHR10003:SF34 - SUPEROXIDE DISMUTASE [CU-ZN] 2, CHLOROPLASTIC (1 of 3)	0	74.615	28	4	19	4	209	21.6	6.33	109.27	4	0	0.985	0.974587	59.14	95.5	104.5	25.53	49.26	High	High	High	High	High	Not Found	1		3	2	Present Both	1	GLYMA_11G192700	GLYMA_11G192700	sp|O78310|SODC2_ARATH	Superoxide dismutase [Cu-Zn] 2, chloroplastic GN=CSD2	ident:142/209 pos:154/209 query:209 hit:216 align:182 bit:276.6	OK	Superoxide dismutase [Cu-Zn] 2, chloroplastic	Copper/zinc superoxide dismutase 2	SODC2_ARATH	O78310	Q0WUQ0; Q541D5; Q9SUJ7; Q9SUJ8	CSD2	KD-SOD; SODCP	Arabidopsis thaliana (Mouse-ear cress)	3702
High	Master Protein	GLYMA_04G061900	PTHR10050 - DOLICHYL-PHOSPHATE-MANNOSE--PROTEIN MANNOSYLTRANSFERASE (1 of 2)	0	66.685	27	6	19	6	222	24.3	7.33	71.1	6	0	1.55	0.799254	71.68	79.9	120.1	10.61	90.41	High	High	High	High	High	High	1		3	3	Present Both	1	GLYMA_04G061900	GLYMA_04G061900	sp|Q93ZE8|SDF2_ARATH	Stromal cell-derived factor 2-like protein GN=SDF2	ident:177/222 pos:196/222 query:222 hit:218 align:221 bit:374.4	OK	Stromal cell-derived factor 2-like protein (AtSDF2; SDF2-like protein)	na	SDF2_ARATH	Q93ZE8	O81720; Q9SEZ5	SDF2	na	Arabidopsis thaliana (Mouse-ear cress)	3702
High	Master Protein	GLYMA_10G158700	PTHR10110:SF117 - SODIUM/HYDROGEN EXCHANGER 1-RELATED (1 of 7)	0	16.31	7	3	9	2	546	60.1	7.25	21.67	3	2	0.916	0.952604	62.59	91.5	108.5	15.87	81.08	High	High	Peak Found	Not Found	High	High	1	Phospho [S536]	3	2	Present Both	1	GLYMA_10G158700	GLYMA_10G158700	sp|Q56XP4|NHX2_ARATH	Sodium/hydrogen exchanger 2 GN=NHX2	ident:419/546 pos:470/546 query:546 hit:546 align:541 bit:853.2	OK	Sodium/hydrogen exchanger 2	Na(+)/H(+) exchanger 2 (NHE-2)	NHX2_ARATH	Q56XP4	Q9CAW6	NHX2	na	Arabidopsis thaliana (Mouse-ear cress)	3702
High	Master Protein	GLYMA_16G072400	PTHR10168//PTHR10168:SF104 - GLUTAREDOXIN // SUBFAMILY NOT NAMED (1 of 1)	0	51.771	59	5	13	5	107	11.3	6.52	38.92	5	0	1.297	0.89095	62.32	166.3	33.7	30.13	39.62	High	High	High	High	High	High	1		3	3	Present Both	1	GLYMA_16G072400	GLYMA_16G072400	sp|Q9FNE2|GRXC2_ARATH	Glutaredoxin-C2 GN=GRXC2	ident:77/107 pos:89/107 query:107 hit:111 align:107 bit:167.9	OK	Glutaredoxin-C2 (AtGrxC2)	na	GRXC2_ARATH	Q9FNE2	na	GRXC2	GRX370	Arabidopsis thaliana (Mouse-ear cress)	3702
High	Master Protein	GLYMA_15G168700	PTHR10168:SF112 - GLUTAREDOXIN-C4 (1 of 2)	0	17.672	30	4	10	1	134	14.9	6.4	21.89	4	3	2.366	0.456342	79.56	60.1	139.9	30.87	72.8	High	Peak Found	Not Found	High	Not Found	High	1		2	2	Present Both	1	GLYMA_15G168700	GLYMA_15G168700	sp|Q8LFQ6|GRXC4_ARATH	Glutaredoxin-C4 GN=GRXC4	ident:80/134 pos:100/134 query:134 hit:135 align:117 bit:169.5	OK	Glutaredoxin-C4 (AtGrxC4)	na	GRXC4_ARATH	Q8LFQ6	Q9M457	GRXC4	GLU1	Arabidopsis thaliana (Mouse-ear cress)	3702
High	Master Protein	GLYMA_19G020000	PTHR10264//PTHR10264:SF93 - BAND 7 PROTEIN-RELATED // SUBFAMILY NOT NAMED (1 of 7)	0	217.273	48	15	49	4	286	31.5	5.24	174.91	15	0	1.769	0.700985	274.41	63	137	9.26	131.13	High	High	High	High	Not Found	High	1		3	2	Present Both	1	GLYMA_19G020000	GLYMA_19G020000	sp|Q9FM19|HIR1_ARATH	Hypersensitive-induced response protein 1 GN=HIR1	ident:242/286 pos:265/286 query:286 hit:286 align:284 bit:506.1	OK	Hypersensitive-induced response protein 1 (AtHIR1)	na	HIR1_ARATH	Q9FM19	na	HIR1	na	Arabidopsis thaliana (Mouse-ear cress)	3702
High	Master Protein	GLYMA_13G065000	PTHR10264//PTHR10264:SF93 - BAND 7 PROTEIN-RELATED // SUBFAMILY NOT NAMED (1 of 7)	0	178.316	45	15	48	4	286	31.5	5.24	161.08	15	9	0.754	0.846756	56.75	151.1	48.9	28.37	136.39	High	High	Peak Found	High	Peak Found	High	1		3	3	Present Both	1	GLYMA_13G065000	GLYMA_13G065000	sp|Q9FM19|HIR1_ARATH	Hypersensitive-induced response protein 1 GN=HIR1	ident:242/286 pos:263/286 query:286 hit:286 align:284 bit:505.0	OK	Hypersensitive-induced response protein 1 (AtHIR1)	na	HIR1_ARATH	Q9FM19	na	HIR1	na	Arabidopsis thaliana (Mouse-ear cress)	3702
High	Master Protein	GLYMA_04G226400	PTHR10264:SF27 - STOMATIN-LIKE PROTEIN 2, MITOCHONDRIAL (1 of 2)	0	171.509	44	15	60	4	404	43.9	9.11	188.43	15	0	0.883	0.93555	50.1	113.3	86.7	53.69	49.97	High	High	High	High	High	High	1		3	3	Present Both	1	GLYMA_04G226400	GLYMA_04G226400	sp|Q9SRH6|HIR3_ARATH	Hypersensitive-induced response protein 3 GN=HIR3	ident:54/404 pos:100/404 query:404 hit:285 align:193 bit:73.2	Partial_match_query	Hypersensitive-induced response protein 3 (AtHIR3)	na	HIR3_ARATH	Q9SRH6	na	HIR3	P31	Arabidopsis thaliana (Mouse-ear cress)	3702
High	Master Protein	GLYMA_06G138500	PTHR10264:SF27 - STOMATIN-LIKE PROTEIN 2, MITOCHONDRIAL (1 of 2)	0	164.868	31	15	64	4	404	44	9.2	190.42	15	12	1.589	0.783539	77.19	82.8	117.2	47.42	66.44	High	High	High	High	High	High	1		3	3	Present Both	1	GLYMA_06G138500	GLYMA_06G138500	sp|Q9SRH6|HIR3_ARATH	Hypersensitive-induced response protein 3 GN=HIR3	ident:54/404 pos:100/404 query:404 hit:285 align:193 bit:72.8	Partial_match_query	Hypersensitive-induced response protein 3 (AtHIR3)	na	HIR3_ARATH	Q9SRH6	na	HIR3	P31	Arabidopsis thaliana (Mouse-ear cress)	3702
High	Master Protein	GLYMA_10G237000	PTHR10281:SF45 - MEMBRANE STEROID-BINDING PROTEIN 1-RELATED (1 of 5)	0	109.88	35	6	30	3	235	25.9	5.11	111.73	6	5	0.801	0.871876	52.06	83.9	116.1	30.45	48.49	High	High	Not Found	Not Found	Not Found	High	1		2	1	Only Control	1	GLYMA_10G237000	GLYMA_10G237000	sp|Q9XFM6|MSBP1_ARATH	Membrane steroid-binding protein 1 GN=MSBP1	ident:142/235 pos:163/235 query:235 hit:220 align:215 bit:277.7	OK	Membrane steroid-binding protein 1 (AtMP1)	Membrane-associated progesterone-binding protein 5 (AtMAPR5)	MSBP1_ARATH	Q9XFM6	Q9LTJ7	MSBP1	MAPR5 MP1	Arabidopsis thaliana (Mouse-ear cress)	3702
High	Master Protein	GLYMA_16G194100	PTHR10281:SF45 - MEMBRANE STEROID-BINDING PROTEIN 1-RELATED (1 of 5)	0	95.046	28	5	27	2	222	24.2	4.64	107.03	5	1	1.568	0.804759	51.17	83.7	116.3	25.91	44.11	High	High	Not Found	Not Found	Not Found	Not Found	1		2	0	Only Control	1	GLYMA_16G194100	GLYMA_16G194100	sp|Q9M2Z4|MSBP2_ARATH	Membrane steroid-binding protein 2 GN=MSBP2	ident:142/222 pos:160/222 query:222 hit:233 align:213 bit:270.0	OK	Membrane steroid-binding protein 2 (AtMP2)	Membrane-associated progesterone-binding protein 3 (AtMAPR3)	MSBP2_ARATH	Q9M2Z4	Q9XFM5	MSBP2	MAPR3; MP2	Arabidopsis thaliana (Mouse-ear cress)	3702
High	Master Protein	GLYMA_16G143300	PTHR10334:SF207 - CAP (CYSTEINE-RICH SECRETORY PROTEINS, ANTIGEN 5, AND PATHOGENESIS-RELATED 1 PROTEIN) SUPERFAMILY PROTEIN (1 of 3)	0	17.354	21	4	14	4	174	18.7	8.68	35.13	4	0	0.761	0.851856	25.38	116.4	83.6	74.14	61.05	High	High	High	High	High	High	1		3	3	Present Both	1	GLYMA_16G143300	GLYMA_16G143300	sp|P33154|PR1_ARATH	Pathogenesis-related protein 1 GN=PRA1B5	ident:69/174 pos:96/174 query:174 hit:161 align:169 bit:116.7	Poor_match	Pathogenesis-related protein 1 (PR-1)	na	PR1_ARATH	P33154	Q1PF70	OrderedLocusNames=At2g14610	na	Arabidopsis thaliana (Mouse-ear cress)	3702
High	Master Protein	GLYMA_07G100500	PTHR10353:SF28 - BETA-GLUCOSIDASE 43-RELATED (1 of 2)	0	6.973	3	2	4	1	515	58.7	8.97	5.87	2	1	0.576	0.712691	15.43	130.3	69.7	17.56	14.47	High	High	Not Found	Peak Found	Not Found	Not Found	1		2	1	Only Control	1	GLYMA_07G100500	GLYMA_07G100500	sp|Q9LV33|BGL44_ARATH	Beta-glucosidase 44 GN=BGLU44	ident:391/515 pos:430/515 query:515 hit:512 align:487 bit:836.3	OK	Beta-glucosidase 44 (AtBGLU44)	na	BGL44_ARATH	Q9LV33	na	BGLU44	na	Arabidopsis thaliana (Mouse-ear cress)	3702
High	Master Protein	GLYMA_10G018400	PTHR10366:SF465 - UDP-GLUCURONIC ACID DECARBOXYLASE 1 (1 of 6)	0	115.803	30	12	48	4	427	48	8.92	136.42	12	10	0.958	0.970588	65.05	121.4	78.6	21.7	115.05	High	High	High	High	High	High	1		3	3	Present Both	1	GLYMA_10G018400	GLYMA_10G018400	sp|Q9LZI2|UXS2_ARATH	UDP-glucuronic acid decarboxylase 2 GN=UXS2	ident:356/427 pos:384/427 query:427 hit:445 align:435 bit:723.0	OK	UDP-glucuronic acid decarboxylase 2	UDP-XYL synthase 2; UDP-glucuronate decarboxylase 2 (UGD; UXS-2); dTDP-glucose 4-6-dehydratase homolog D18	UXS2_ARATH	Q9LZI2	Q39077	UXS2	AUD1; D18	Arabidopsis thaliana (Mouse-ear cress)	3702
High	Master Protein	GLYMA_13G367000	PTHR10371 - NADH DEHYDROGENASE UBIQUINONE FLAVOPROTEIN 2, MITOCHONDRIAL (1 of 2)	0	120.422	29	9	64	9	299	33.6	7.05	189.39	9	0	2.11	0.552188	79.13	58.1	141.9	4.48	83.99	High	High	High	High	High	High	1		3	3	Present Both	1	GLYMA_13G367000	GLYMA_13G367000	sp|O22769|NDUV2_ARATH	NADH dehydrogenase [ubiquinone] flavoprotein 2, mitochondrial GN=NDL3	ident:191/299 pos:203/299 query:299 hit:255 align:220 bit:405.2	OK	NADH dehydrogenase [ubiquinone] flavoprotein 2, mitochondrial	na	NDUV2_ARATH	O22769	Q940Z9	OrderedLocusNames=At4g02580	na	Arabidopsis thaliana (Mouse-ear cress)	3702
High	Master Protein	GLYMA_01G149700	PTHR10381//PTHR10381:SF24 - ATP-DEPENDENT CLP PROTEASE PROTEOLYTIC SUBUNIT // SUBFAMILY NOT NAMED (1 of 2)	0	50.327	23	5	22	5	306	33.1	6.96	62.47	5	0	0.575	0.653539	19.57	94.6	105.4	28.13	42.05	High	High	High	High	High	High	1		3	3	Present Both	1	GLYMA_01G149700	GLYMA_01G149700	sp|Q94B60|CLPP4_ARATH	ATP-dependent Clp protease proteolytic subunit 4, chloroplastic GN=CLPP4	ident:208/306 pos:229/306 query:306 hit:292 align:273 bit:405.6	OK	ATP-dependent Clp protease proteolytic subunit 4, chloroplastic	Endopeptidase ClpP4 (nClpP4); nClpP3	CLPP4_ARATH	Q94B60	Q8LAN0; Q9FHJ7; Q9SXJ5; Q9ZS78	CLPP4 NCLPP4	na	Arabidopsis thaliana (Mouse-ear cress)	3702
High	Master Protein	GLYMA_02G011800	PTHR10381:SF12 - ATP-DEPENDENT CLP PROTEASE PROTEOLYTIC SUBUNIT 5, CHLOROPLASTIC (1 of 5)	0	12.753	5	2	5	2	311	33.8	8.51	14.92	2	0	0.275	0.243821	3.46	156.8	43.2	46.74		High	High	High	High	Not Found	Not Found	1		3	1	Only Control	1	GLYMA_02G011800	GLYMA_02G011800	sp|Q9S834|CLPP5_ARATH	ATP-dependent Clp protease proteolytic subunit 5, chloroplastic GN=CLPP5	ident:246/311 pos:257/311 query:311 hit:298 align:303 bit:492.3	OK	ATP-dependent Clp protease proteolytic subunit 5, chloroplastic	Endopeptidase ClpP5 (nClpP5); nClpP1	CLPP5_ARATH	Q9S834	na	CLPP5 NCLPP5	na	Arabidopsis thaliana (Mouse-ear cress)	3702
High	Master Protein	GLYMA_07G084100	PTHR10430 - PEROXIREDOXIN (1 of 9)	0	123.147	46	9	53	9	162	17.4	5.59	189.04	9	0	1.191	0.946873	50.56	82.9	117.1	18.66	25.88	High	High	High	High	High	High	1		3	3	Present Both	1	GLYMA_07G084100	GLYMA_07G084100	sp|Q9XEX2|PRX2B_ARATH	Peroxiredoxin-2B GN=PRXIIB	ident:126/162 pos:149/162 query:162 hit:162 align:162 bit:273.9	OK	Peroxiredoxin-2B	Peroxiredoxin IIB; Peroxiredoxin TPx1; Thioredoxin peroxidase 2B; Thioredoxin-dependent peroxidase 1	PRX2B_ARATH	Q9XEX2	na	PRXIIB	TPX1	Arabidopsis thaliana (Mouse-ear cress)	3702
High	Master Protein	GLYMA_19G190800	PTHR10430:SF16 - PEROXIREDOXIN-5, MITOCHONDRIAL (1 of 2)	0	41.389	17	3	10	3	215	23	7.96	37.22	3	0	1.288	0.895056	54.64	88	112	63.86	59.8	High	High	High	High	High	Peak Found	1		3	3	Present Both	1	GLYMA_19G190800	GLYMA_19G190800	sp|Q949U7|PRX2E_ARATH	Peroxiredoxin-2E, chloroplastic GN=PRXIIE	ident:144/215 pos:178/215 query:215 hit:234 align:234 bit:280.0	OK	Peroxiredoxin-2E, chloroplastic	Peroxiredoxin IIE; Thioredoxin peroxidase 2E	PRX2E_ARATH	Q949U7	Q9LF96	PRXIIE	na	Arabidopsis thaliana (Mouse-ear cress)	3702
High	Master Protein	GLYMA_13G207000	PTHR10430:SF7 - PEROXIREDOXIN-2F, MITOCHONDRIAL (1 of 4)	0	46.286	45	7	20	7	197	21.2	8.63	57.45	7	0	1.197	0.942784	39.35	78.7	121.3	23.71	40.37	High	High	High	High	High	High	1		3	3	Present Both	1	GLYMA_13G207000	GLYMA_13G207000	sp|Q9M7T0|PRX2F_ARATH	Peroxiredoxin-2F, mitochondrial GN=PRXIIF	ident:139/197 pos:156/197 query:197 hit:201 align:182 bit:292.0	OK	Peroxiredoxin-2F, mitochondrial	Peroxiredoxin IIF; Thioredoxin peroxidase 2F	PRX2F_ARATH	Q9M7T0	Q8LEJ1; Q8LPM1; Q941C2	PRXIIF	na	Arabidopsis thaliana (Mouse-ear cress)	3702
High	Master Protein	GLYMA_12G151400	PTHR10438//PTHR10438:SF285 - THIOREDOXIN // SUBFAMILY NOT NAMED (1 of 3)	0	27.947	30	5	14	1	175	18.9	9.04	27.82	5	2	0.597	0.6772	9.91	121.2	78.8	5.28		High	High	High	High	Not Found	Not Found	1		3	1	Only Control	1	GLYMA_12G151400	GLYMA_12G151400	sp|Q9SEU6|TRXM4_ARATH	Thioredoxin M4, chloroplastic GN=NTRC	ident:88/175 pos:108/175 query:175 hit:193 align:133 bit:191.0	OK	Thioredoxin M4, chloroplastic (AtTrxm4)	na	TRXM4_ARATH	Q9SEU6	Q0WUS9; Q9LDP6	OrderedLocusNames=At3g15360	na	Arabidopsis thaliana (Mouse-ear cress)	3702
High	Master Protein	GLYMA_12G223400	PTHR10438//PTHR10438:SF285 - THIOREDOXIN // SUBFAMILY NOT NAMED (1 of 3)	0	25.281	29	5	11	2	182	19.7	8.87	19.68	5	3	0.719	0.816344	19.1	120.2	79.8	17.9	47.67	High	High	High	High	High	Peak Found	1		3	3	Present Both	1	GLYMA_12G223400	GLYMA_12G223400	sp|Q9SEU6|TRXM4_ARATH	Thioredoxin M4, chloroplastic GN=NTRC	ident:84/182 pos:103/182 query:182 hit:193 align:122 bit:190.3	Poor_match	Thioredoxin M4, chloroplastic (AtTrxm4)	na	TRXM4_ARATH	Q9SEU6	Q0WUS9; Q9LDP6	OrderedLocusNames=At3g15360	na	Arabidopsis thaliana (Mouse-ear cress)	3702
High	Master Protein	GLYMA_06G121400	PTHR10438//PTHR10438:SF290 - THIOREDOXIN // SUBFAMILY NOT NAMED (1 of 4)	0	23.234	21	3	9	3	181	20	8.62	22.15	3	0	0.643	0.753488	19.86	129.5	70.5	18.25	83.69	High	High	High	High	Peak Found	Peak Found	1		3	3	Present Both	1	GLYMA_06G121400	GLYMA_06G121400	sp|Q9SEU8|TRXM2_ARATH	Thioredoxin M2, chloroplastic GN=TRX7	ident:69/181 pos:105/181 query:181 hit:186 align:148 bit:163.3	Poor_match	Thioredoxin M2, chloroplastic (AtTrxm2)	na	TRXM2_ARATH	Q9SEU8	Q56YG4; Q8LG26; Q9ZT79	OrderedLocusNames=At4g03520	na	Arabidopsis thaliana (Mouse-ear cress)	3702
High	Master Protein	GLYMA_06G028600	PTHR10438//PTHR10438:SF293 - THIOREDOXIN // SUBFAMILY NOT NAMED (1 of 2)	0	4.734	9	1	1	1	117	13	5.88	2.24	1	0	1.561	0.893467	13.07	78.1	121.9	12.42		High	Peak Found	Not Found	Peak Found	Not Found	Not Found	1		2	1	Only Control	1	GLYMA_06G028600	GLYMA_06G028600	sp|P29448|TRXH1_ARATH	Thioredoxin H1 GN=TRX1	ident:81/117 pos:95/117 query:117 hit:114 align:112 bit:177.6	OK	Thioredoxin H1 (AtTrxh1)	Thioredoxin 1 (AtTRX1)	TRXH1_ARATH	P29448	na	TRX1	na	Arabidopsis thaliana (Mouse-ear cress)	3702
High	Master Protein	GLYMA_19G184600	PTHR10438:SF126 - THIOREDOXIN (1 of 2)	0	28.922	35	5	10	5	133	15.1	6.52	18.89	5	0	2.247	0.507044	26.82	72.7	127.3	55.24	21.49	High	High	High	High	High	Not Found	1		3	2	Present Both	1	GLYMA_19G184600	GLYMA_19G184600	sp|Q8LCH9|TRL33_ARATH	Thioredoxin-like 3-3 GN=OVA7	ident:84/133 pos:97/133 query:133 hit:126 align:125 bit:172.2	OK	Thioredoxin-like 3-3	na	TRL33_ARATH	Q8LCH9	Q9SCN9	OrderedLocusNames=At3g53220	na	Arabidopsis thaliana (Mouse-ear cress)	3702
High	Master Protein	GLYMA_15G063100	PTHR10438:SF242 - THIOREDOXIN-LIKE PROTEIN CXXS1 (1 of 7)	0	26.495	22	3	7	3	124	13.7	4.7	14.35	3	0	4.962	0.0512177	126.31	93.4	106.6	20.13	140.32	High	High	Not Found	High	Peak Found	High	1		2	3	Present Both	1	GLYMA_15G063100	GLYMA_15G063100	sp|Q8LDI5|CXXS1_ARATH	Thioredoxin-like protein CXXS1 GN=CXXS1	ident:75/124 pos:94/124 query:124 hit:118 align:113 bit:164.9	OK	Thioredoxin-like protein CXXS1 (AtCXXS1)	Mono-cysteine thioredoxin 1	CXXS1_ARATH	Q8LDI5	Q2HIL3; Q9SYX9; Q9XH49	CXXS1	na	Arabidopsis thaliana (Mouse-ear cress)	3702
High	Master Protein	GLYMA_06G245200	PTHR10438:SF255 - THIOREDOXIN M4, CHLOROPLASTIC (1 of 1)	0	27.54	31	5	13	1	169	18.4	9.25	22.75	5	0	0.604	0.714445	2.99	124.7	75.3	7.81		High	High	Not Found	High	Not Found	Not Found	1		2	1	Only Control	1	GLYMA_06G245200	GLYMA_06G245200	sp|Q9SEU6|TRXM4_ARATH	Thioredoxin M4, chloroplastic GN=NTRC	ident:89/169 pos:109/169 query:169 hit:193 align:133 bit:192.6	OK	Thioredoxin M4, chloroplastic (AtTrxm4)	na	TRXM4_ARATH	Q9SEU6	Q0WUS9; Q9LDP6	OrderedLocusNames=At3g15360	na	Arabidopsis thaliana (Mouse-ear cress)	3702
High	Master Protein	GLYMA_01G182500	PTHR10438:SF272 - THIOREDOXIN-LIKE PROTEIN HCF164, CHLOROPLASTIC (1 of 3)	0	24.905	13	3	17	3	252	28.1	6.54	61.61	3	0	0.506	0.545566	12.39	137	63	62.35	40.08	High	High	High	High	High	Not Found	1		3	2	Present Both	1	GLYMA_01G182500	GLYMA_01G182500	sp|O23166|TR164_ARATH	Thioredoxin-like protein HCF164, chloroplastic GN=HCF164	ident:162/252 pos:200/252 query:252 hit:261 align:275 bit:322.4	OK	Thioredoxin-like protein HCF164, chloroplastic	Protein HIGH CHLOROPHYLL FLUORESCENCE 164	TR164_ARATH	O23166	na	HCF164	na	Arabidopsis thaliana (Mouse-ear cress)	3702
High	Master Protein	GLYMA_14G070500	PTHR10438:SF274 - THIOREDOXIN H1 (1 of 4)	0	6.315	17	2	5	2	119	13	5.48	9.18	2	0	1.208	0.94962	70.44	74.3	125.7	61.78	60.59	High	Peak Found	High	High	High	Not Found	1		3	2	Present Both	1	GLYMA_14G070500	GLYMA_14G070500	sp|P29448|TRXH1_ARATH	Thioredoxin H1 GN=TRX1	ident:73/119 pos:96/119 query:119 hit:114 align:112 bit:169.9	OK	Thioredoxin H1 (AtTrxh1)	Thioredoxin 1 (AtTRX1)	TRXH1_ARATH	P29448	na	TRX1	na	Arabidopsis thaliana (Mouse-ear cress)	3702
High	Master Protein	GLYMA_09G083700	PTHR10476:SF8 - VACUOLAR PROTEIN SORTING-ASSOCIATED PROTEIN 2 HOMOLOG 2 (1 of 2)	0	4.503	5	1	1	1	219	24.4	9.25	3.45	1	0	0.01	6.62973e-17		200		22.19		High	Peak Found	Not Found	Not Found	Not Found	Not Found	1		2	0	Only Control	1	GLYMA_09G083700	GLYMA_09G083700	sp|Q0WTY4|VPS2B_ARATH	Vacuolar protein sorting-associated protein 2 homolog 2 GN=VPS2.2	ident:185/219 pos:203/219 query:219 hit:222 align:222 bit:365.9	OK	Vacuolar protein sorting-associated protein 2 homolog 2 (AtVPS2-2)	Charged multivesicular body protein 2 homolog 2; ESCRT-III complex subunit VPS2 homolog 2	VPS2B_ARATH	Q0WTY4	B3H7E8; Q84TF3; Q9FGV7	VPS2.2	CHMP2-2	Arabidopsis thaliana (Mouse-ear cress)	3702
High	Master Protein	GLYMA_13G088700	PTHR10502:SF98 - ANNEXIN D1-RELATED (1 of 5)	0	48.88	24	8	10	8	316	35.9	6.96	25.22	8	0	2.844	0.283017	132.47	26.2	173.8	72.1	135.29	High	Peak Found	Peak Found	Peak Found	Not Found	High	1		3	2	Present Both	1	GLYMA_13G088700	GLYMA_13G088700	sp|Q9SYT0|ANXD1_ARATH	Annexin D1 GN=ANN1	ident:226/316 pos:268/316 query:316 hit:317 align:317 bit:472.2	OK	Annexin D1	AnnAt1; Annexin A1	ANXD1_ARATH	Q9SYT0	Q39001; Q42023; Q56Y94; Q96527	ANN1	ANNAT1; ANX23-ATH; ATOXY5; OXY5	Arabidopsis thaliana (Mouse-ear cress)	3702
High	Master Protein	GLYMA_03G114100	PTHR10516:SF178 - PEPTIDYL-PROLYL CIS-TRANS ISOMERASE FKBP20-2, CHLOROPLASTIC (1 of 2)	0	27.02	13	2	7	1	248	28	9.06	19.42	2	0	0.431	0.471058	0.35	139.7	60.3	1.81		High	High	High	High	Not Found	Not Found	1		3	1	Only Control	1	GLYMA_03G114100	GLYMA_03G114100	sp|Q0WRJ7|FK202_ARATH	Peptidyl-prolyl cis-trans isomerase FKBP20-2, chloroplastic GN=FKBP20-2	ident:158/248 pos:182/248 query:248 hit:242 align:203 bit:314.7	OK	Peptidyl-prolyl cis-trans isomerase FKBP20-2, chloroplastic (PPIase FKBP20-2)	FK506-binding protein 20-2 (AtFKBP20-2); Immunophilin FKBP20-2; Rotamase	FK202_ARATH	Q0WRJ7	Q9M222	FKBP20-2	na	Arabidopsis thaliana (Mouse-ear cress)	3702
High	Master Protein	GLYMA_07G112600	PTHR10516:SF178 - PEPTIDYL-PROLYL CIS-TRANS ISOMERASE FKBP20-2, CHLOROPLASTIC (1 of 2)	0	23.815	11	2	6	1	299	33.8	8.48	17.39	2	1	0.413	0.42593	1.75	141.5	58.5	9.33		High	High	Peak Found	High	Not Found	Not Found	1		3	1	Only Control	1	GLYMA_07G112600	GLYMA_07G112600	sp|Q0WRJ7|FK202_ARATH	Peptidyl-prolyl cis-trans isomerase FKBP20-2, chloroplastic GN=FKBP20-2	ident:158/299 pos:184/299 query:299 hit:242 align:206 bit:318.5	OK	Peptidyl-prolyl cis-trans isomerase FKBP20-2, chloroplastic (PPIase FKBP20-2)	FK506-binding protein 20-2 (AtFKBP20-2); Immunophilin FKBP20-2; Rotamase	FK202_ARATH	Q0WRJ7	Q9M222	FKBP20-2	na	Arabidopsis thaliana (Mouse-ear cress)	3702
High	Master Protein	GLYMA_11G124900	PTHR10516:SF264 - FK506-BINDING PROTEIN 1 (1 of 2)	0	32.463	23	3	7	3	232	24.6	6.7	19.53	3	0	1.137	0.986342	115.19	78.7	121.3	112.67	45.15	High	High	High	High	High	Not Found	1		3	2	Present Both	1	GLYMA_11G124900	GLYMA_11G124900	sp|O22870|FK163_ARATH	Peptidyl-prolyl cis-trans isomerase FKBP16-3, chloroplastic GN=FKBP16-3	ident:158/232 pos:180/232 query:232 hit:223 align:228 bit:299.3	OK	Peptidyl-prolyl cis-trans isomerase FKBP16-3, chloroplastic (PPIase FKBP16-3)	FK506-binding protein 16-3 (AtFKBP16-3); Immunophilin FKBP16-3; Rotamase	FK163_ARATH	O22870	Q940C0	FKBP16-3	FKBP17	Arabidopsis thaliana (Mouse-ear cress)	3702
High	Master Protein	GLYMA_08G139100	PTHR10516:SF269 - PEPTIDYL-PROLYL CIS-TRANS ISOMERASE FKBP16-2, CHLOROPLASTIC (1 of 2)	0	95.824	18	5	37	5	209	22.3	7.83	132.99	5	0	0.532	0.581816	10.88	138.6	61.4	10.63	4.44	High	High	High	High	High	Not Found	1		3	2	Present Both	1	GLYMA_08G139100	GLYMA_08G139100	sp|Q9SCY3|PNSL4_ARATH	Photosynthetic NDH subunit of lumenal location 4, chloroplastic GN=PNSL4	ident:132/209 pos:152/209 query:209 hit:217 align:177 bit:285.4	OK	Photosynthetic NDH subunit of lumenal location 4, chloroplastic	FK506-binding protein 16-2 (AtFKBP16-2); Immunophilin FKBP16-2; Peptidyl-prolyl cis-trans isomerase FKBP16-2 (PPIase FKBP16-2); Rotamase	PNSL4_ARATH	Q9SCY3	O65658; Q941D9	PNSL4	na	Arabidopsis thaliana (Mouse-ear cress)	3702
High	Master Protein	GLYMA_13G148400	PTHR10516:SF323 - PEPTIDYL-PROLYL CIS-TRANS ISOMERASE FKBP16-4, CHLOROPLASTIC (1 of 2)	0	82.882	51	9	34	9	194	20.8	9.5	98.86	9	0	0.563	0.627356	13.31	135	65	34.33	27.12	High	High	High	High	High	Peak Found	1		3	3	Present Both	1	GLYMA_13G148400	GLYMA_13G148400	sp|Q9SR70|FK164_ARATH	Peptidyl-prolyl cis-trans isomerase FKBP16-4, chloroplastic GN=FKBP16-4	ident:146/194 pos:160/194 query:194 hit:230 align:177 bit:301.2	OK	Peptidyl-prolyl cis-trans isomerase FKBP16-4, chloroplastic (PPIase FKBP16-4)	FK506-binding protein 16-4 (AtFKBP16-4); Immunophilin FKBP16-4; Rotamase	FK164_ARATH	Q9SR70	na	FKBP16-4	FKBP24-2	Arabidopsis thaliana (Mouse-ear cress)	3702
High	Master Protein	GLYMA_18G165200	PTHR10562//PTHR10562:SF26 - SMALL UBIQUITIN-RELATED MODIFIER // SUBFAMILY NOT NAMED (1 of 3)	0	12.66	24	2	5	2	114	13	5.78	14.16	2	0	1.467	0.854204	61.88	81.1	118.9	17.8	52.73	High	High	Peak Found	High	High	Peak Found	1		3	3	Present Both	1	GLYMA_18G165200	GLYMA_18G165200	sp|Q9FLP6|SUMO2_ARATH	Small ubiquitin-related modifier 2 GN=SUMO2	ident:88/114 pos:90/114 query:114 hit:103 align:94 bit:179.5	OK	Small ubiquitin-related modifier 2 (AtSUMO2)	na	SUMO2_ARATH	Q9FLP6	Q67ZL9	SUMO2	SUM2	Arabidopsis thaliana (Mouse-ear cress)	3702
High	Master Protein	GLYMA_15G072100	PTHR10639:SF7 - CLATHRIN LIGHT CHAIN (1 of 4)	0	473.391	52	34	190	6	322	35.3	5.19	642.73	34	30	0.981	0.973365	71.9	88.9	111.1	5.02	21.56	High	High	High	High	High	High	1		3	3	Present Both	1	GLYMA_15G072100	GLYMA_15G072100	sp|Q9SKU1|CLC1_ARATH	Clathrin light chain 1 GN=CKX6	ident:168/322 pos:193/322 query:322 hit:338 align:299 bit:244.6	OK	Clathrin light chain 1	na	CLC1_ARATH	Q9SKU1	Q8LG44	OrderedLocusNames=At2g20760	na	Arabidopsis thaliana (Mouse-ear cress)	3702
High	Master Protein	GLYMA_13G241300	PTHR10639:SF7 - CLATHRIN LIGHT CHAIN (1 of 4)	0	473.142	54	34	191	6	313	34.6	5.12	660.07	34	0	1.189	0.946873	74.95	84.1	115.9	30.16	61.23	High	High	High	High	High	High	1		3	3	Present Both	1	GLYMA_13G241300	GLYMA_13G241300	sp|Q9SKU1|CLC1_ARATH	Clathrin light chain 1 GN=CKX6	ident:167/313 pos:199/313 query:313 hit:338 align:302 bit:248.1	OK	Clathrin light chain 1	na	CLC1_ARATH	Q9SKU1	Q8LG44	OrderedLocusNames=At2g20760	na	Arabidopsis thaliana (Mouse-ear cress)	3702
High	Master Protein	GLYMA_13G181500	PTHR10639:SF7 - CLATHRIN LIGHT CHAIN (1 of 4)	0	264.237	39	22	99	3	303	33.5	5.34	351.47	22	0	0.867	0.918392	47.02	122.2	77.8	58.48	125.89	High	High	Peak Found	High	High	High	1		3	3	Present Both	1	GLYMA_13G181500	GLYMA_13G181500	sp|Q9SKU1|CLC1_ARATH	Clathrin light chain 1 GN=CKX6	ident:160/303 pos:189/303 query:303 hit:338 align:301 bit:226.1	OK	Clathrin light chain 1	na	CLC1_ARATH	Q9SKU1	Q8LG44	OrderedLocusNames=At2g20760	na	Arabidopsis thaliana (Mouse-ear cress)	3702
High	Master Protein	GLYMA_05G020200	PTHR10693//PTHR10693:SF24 - RAS GTPASE-ACTIVATING PROTEIN-BINDING PROTEIN // SUBFAMILY NOT NAMED (1 of 2)	0	23.45	3	1	5	1	462	50.3	5.59	13.9	1	0	1.034	0.992627	32.35	109.8	90.2	34.74	33.04	High	High	Peak Found	Peak Found	High	High	1		3	3	Present Both	1	GLYMA_05G020200	GLYMA_05G020200	sp|Q9C7F5|NTF2B_ARATH	Nuclear transport factor 2B GN=NTF2B	ident:43/462 pos:60/462 query:462 hit:126 align:121 bit:57.4	Partial_match_query	Nuclear transport factor 2B (AtNTF2b; NTF-2)	na	NTF2B_ARATH	Q9C7F5	Q1H566	NTF2B	na	Arabidopsis thaliana (Mouse-ear cress)	3702
High	Master Protein	GLYMA_08G347800	PTHR10693:SF23 - NUCLEAR TRANSPORT FACTOR 2 AND RNA RECOGNITION MOTIF DOMAIN-CONTAINING PROTEIN-RELATED (1 of 2)	0	10.797	9	2	2	2	462	49.4	5.08	6.27	2	0	0.646	0.768499	0	121.5	78.5			High	Not Found	Peak Found	High	Not Found	Not Found	1		2	1	Only Control	1	GLYMA_08G347800	GLYMA_08G347800	sp|Q9C7F5|NTF2B_ARATH	Nuclear transport factor 2B GN=NTF2B	ident:39/462 pos:60/462 query:462 hit:126 align:121 bit:48.5	Partial_match_query	Nuclear transport factor 2B (AtNTF2b; NTF-2)	na	NTF2B_ARATH	Q9C7F5	Q1H566	NTF2B	na	Arabidopsis thaliana (Mouse-ear cress)	3702
High	Master Protein	GLYMA_13G357200	PTHR10744:SF7 - 30S RIBOSOMAL PROTEIN S17, CHLOROPLASTIC (1 of 2)	0	96.756	35	7	34	4	176	20.4	10.15	118.07	7	3	0.745	0.839695	25.04	146.5	53.5	41.63	89.71	High	High	High	High	Peak Found	Not Found	1		3	2	Present Both	1	GLYMA_13G357200	GLYMA_13G357200	sp|P16180|RR17_ARATH	30S ribosomal protein S17, chloroplastic GN=RPS17	ident:89/176 pos:109/176 query:176 hit:149 align:147 bit:169.1	OK	30S ribosomal protein S17, chloroplastic	CS17	RR17_ARATH	P16180	na	RPS17	na	Arabidopsis thaliana (Mouse-ear cress)	3702
High	Master Protein	GLYMA_15G016400	PTHR10744:SF7 - 30S RIBOSOMAL PROTEIN S17, CHLOROPLASTIC (1 of 2)	0	55.177	45	7	25	4	143	16.1	10.21	77.94	7	0	0.71	0.807637	12.58	151.9	48.1	4.86	95.07	High	High	Not Found	High	Peak Found	Not Found	1		2	2	Present Both	1	GLYMA_15G016400	GLYMA_15G016400	sp|P16180|RR17_ARATH	30S ribosomal protein S17, chloroplastic GN=RPS17	ident:87/143 pos:112/143 query:143 hit:149 align:145 bit:167.9	OK	30S ribosomal protein S17, chloroplastic	CS17	RR17_ARATH	P16180	na	RPS17	na	Arabidopsis thaliana (Mouse-ear cress)	3702
High	Master Protein	GLYMA_10G031400	PTHR10751:SF38 - GUANYLATE-BINDING FAMILY PROTEIN (1 of 2)	0.003	2.193	2	1	2	1	601	69	7.5	0	1	0	0.672	0.797038	0.49	119.6	80.4	1.03		High	Peak Found	Not Found	High	Not Found	Not Found	1		2	1	Only Control	1	GLYMA_10G031400	GLYMA_10G031400	sp|Q9FKE9|RHD32_ARATH	Protein ROOT HAIR DEFECTIVE 3 homolog 2 GN=RDL2	ident:30/601 pos:43/601 query:601 hit:834 align:96 bit:42.0	Partial_match_both	Protein ROOT HAIR DEFECTIVE 3 homolog 2	Protein SEY1 homolog 3	RHD32_ARATH	Q9FKE9	na	OrderedLocusNames=At5g45160	na	Arabidopsis thaliana (Mouse-ear cress)	3702
High	Master Protein	GLYMA_16G219000	PTHR10766//PTHR10766:SF58 - TRANSMEMBRANE 9 SUPERFAMILY PROTEIN // SUBFAMILY NOT NAMED (1 of 6)	0	19.735	4	2	9	2	587	67.8	7.61	24.07	2	0	2.72	0.319041	110.18	117.7	82.3	63.57	113.32	High	High	High	High	High	High	1		3	3	Present Both	1	GLYMA_16G219000	GLYMA_16G219000	sp|Q9ZPS7|TMN3_ARATH	Transmembrane 9 superfamily member 3 GN=TMN3	ident:507/587 pos:538/587 query:587 hit:592 align:577 bit:1036.2	OK	Transmembrane 9 superfamily member 3	Endomembrane protein 9; Transmembrane nine protein 3 (AtTMN3)	TMN3_ARATH	Q9ZPS7	B9DHM0; Q56X26	TMN3	na	Arabidopsis thaliana (Mouse-ear cress)	3702
High	Master Protein	GLYMA_08G193400	PTHR10766:SF37 - ENDOMEMBRANE PROTEIN 70 FAMILY PROTEIN (1 of 5)	0	4.937	2	1	3	1	640	73.6	8.22	7.11	1	0	0.967	0.941533	72.16	101.7	98.3	30.59	55.36	High	High	Peak Found	High	Peak Found	Peak Found	1		3	3	Present Both	1	GLYMA_08G193400	GLYMA_08G193400	sp|Q9LIC2|TMN7_ARATH	Transmembrane 9 superfamily member 7 GN=TMN7	ident:543/640 pos:585/640 query:640 hit:641 align:616 bit:1152.9	OK	Transmembrane 9 superfamily member 7	Endomembrane protein 5; Transmembrane nine protein 7 (AtTMN7)	TMN7_ARATH	Q9LIC2	Q0WPY4	TMN7	na	Arabidopsis thaliana (Mouse-ear cress)	3702
High	Master Protein	GLYMA_09G072100	PTHR10772:SF0 - 20 KDA CHAPERONIN, CHLOROPLASTIC (1 of 4)	0	229.895	72	14	81	2	253	26.6	7.39	300.12	14	12	1.15	0.957983	74.25	92.5	107.5	60.09	74.9	High	High	High	High	High	High	1		3	3	Present Both	1	GLYMA_09G072100	GLYMA_09G072100	sp|O65282|CH20_ARATH	20 kDa chaperonin, chloroplastic GN=CPN20	ident:192/253 pos:222/253 query:253 hit:253 align:256 bit:377.9	OK	20 kDa chaperonin, chloroplastic	Chaperonin 10 (Ch-CPN10; Cpn10); Chaperonin 20; Protein Cpn21	CH20_ARATH	O65282	Q9TNN2	CPN20	CHCPN10; CPN21	Arabidopsis thaliana (Mouse-ear cress)	3702
High	Master Protein	GLYMA_15G180900	PTHR10772:SF0 - 20 KDA CHAPERONIN, CHLOROPLASTIC (1 of 4)	0	219.302	70	13	74	1	253	26.7	8.19	288.66	13	0	1.23	0.925423	80.79	82.9	117.1	33.97	84.61	High	High	High	High	High	Not Found	1		3	2	Present Both	1	GLYMA_15G180900	GLYMA_15G180900	sp|O65282|CH20_ARATH	20 kDa chaperonin, chloroplastic GN=CPN20	ident:193/253 pos:222/253 query:253 hit:253 align:256 bit:380.9	OK	20 kDa chaperonin, chloroplastic	Chaperonin 10 (Ch-CPN10; Cpn10); Chaperonin 20; Protein Cpn21	CH20_ARATH	O65282	Q9TNN2	CPN20	CHCPN10; CPN21	Arabidopsis thaliana (Mouse-ear cress)	3702
High	Master Protein	GLYMA_13G112500	PTHR10772:SF0 - 20 KDA CHAPERONIN, CHLOROPLASTIC (1 of 4)	0	36.114	26	6	15	6	251	26.5	8.63	44.02	6	0	0.902	0.946869	82.2	131.1	68.9	92.72	125.77	High	Peak Found	High	High	High	Peak Found	1		3	3	Present Both	1	GLYMA_13G112500	GLYMA_13G112500	sp|O65282|CH20_ARATH	20 kDa chaperonin, chloroplastic GN=CPN20	ident:181/251 pos:216/251 query:251 hit:253 align:251 bit:362.8	OK	20 kDa chaperonin, chloroplastic	Chaperonin 10 (Ch-CPN10; Cpn10); Chaperonin 20; Protein Cpn21	CH20_ARATH	O65282	Q9TNN2	CPN20	CHCPN10; CPN21	Arabidopsis thaliana (Mouse-ear cress)	3702
High	Master Protein	GLYMA_19G128300	PTHR10772:SF8 - 10 KDA CHAPERONIN (1 of 4)	0	23.944	30	4	14	2	97	10.6	8.4	24.82	4	0	1.229	0.926521	35.78	72.9	127.1	13.69	36.41	High	Peak Found	High	High	High	High	1		3	3	Present Both	1	GLYMA_19G128300	GLYMA_19G128300	sp|P34893|CH10_ARATH	10 kDa chaperonin, mitochondrial GN=CPN10	ident:74/97 pos:87/97 query:97 hit:98 align:97 bit:157.9	OK	10 kDa chaperonin, mitochondrial	Chaperonin 10 (CPN10); Protein groES	CH10_ARATH	P34893	Q96249	CPN10	na	Arabidopsis thaliana (Mouse-ear cress)	3702
High	Master Protein	GLYMA_03G125800	PTHR10772:SF8 - 10 KDA CHAPERONIN (1 of 4)	0	13.792	30	4	11	2	97	10.6	8.4	20.84	4	1	2.53	0.382278	37.65	51	149	13.4	36.33	High	High	Not Found	High	High	High	1		2	3	Present Both	1	GLYMA_03G125800	GLYMA_03G125800	sp|P34893|CH10_ARATH	10 kDa chaperonin, mitochondrial GN=CPN10	ident:75/97 pos:87/97 query:97 hit:98 align:97 bit:159.5	OK	10 kDa chaperonin, mitochondrial	Chaperonin 10 (CPN10); Protein groES	CH10_ARATH	P34893	Q96249	CPN10	na	Arabidopsis thaliana (Mouse-ear cress)	3702
High	Master Protein	GLYMA_14G048000	PTHR10795//PTHR10795:SF365 - PROPROTEIN CONVERTASE SUBTILISIN/KEXIN // SUBFAMILY NOT NAMED (1 of 8)	0	84.248	19	12	30	12	783	84	9.31	86.82	12	0	0.962	0.972386	61.18	107.2	92.8	55.69	21.4	High	High	High	High	High	High	1		3	3	Present Both	1	GLYMA_14G048000	GLYMA_14G048000	sp|Q9ZSP5|AIR3_ARATH	Subtilisin-like protease SBT5.3 GN=AIR3	ident:399/783 pos:519/783 query:783 hit:772 align:756 bit:779.6	OK	Subtilisin-like protease SBT5.3	Auxin-induced in root cultures protein 3; Subtilase subfamily 5 member 3 (AtSBT5.3); Subtilisin-like protease AIR3	AIR3_ARATH	Q9ZSP5	Q8S896; Q8S8B0; Q93W36	AIR3	SBT5.3	Arabidopsis thaliana (Mouse-ear cress)	3702
High	Master Protein	GLYMA_18G250100	PTHR10795//PTHR10795:SF365 - PROPROTEIN CONVERTASE SUBTILISIN/KEXIN // SUBFAMILY NOT NAMED (1 of 8)	0	46.433	7	5	14	4	802	86	9.14	43.96	5	0	0.807	0.874801	38.89	115.5	84.5	48.04	100.28	High	High	Peak Found	High	High	High	1		3	3	Present Both	1	GLYMA_18G250100	GLYMA_18G250100	sp|Q9ZSP5|AIR3_ARATH	Subtilisin-like protease SBT5.3 GN=AIR3	ident:399/802 pos:510/802 query:802 hit:772 align:762 bit:753.8	OK	Subtilisin-like protease SBT5.3	Auxin-induced in root cultures protein 3; Subtilase subfamily 5 member 3 (AtSBT5.3); Subtilisin-like protease AIR3	AIR3_ARATH	Q9ZSP5	Q8S896; Q8S8B0; Q93W36	AIR3	SBT5.3	Arabidopsis thaliana (Mouse-ear cress)	3702
High	Master Protein	GLYMA_06G045100	PTHR10795//PTHR10795:SF388 - PROPROTEIN CONVERTASE SUBTILISIN/KEXIN // SUBFAMILY NOT NAMED (1 of 8)	0	19.303	5	4	9	2	769	82.5	8.88	16.94	4	2	0.491	0.522864	12.32	151.5	48.5	33.97	62.44	High	High	Not Found	High	Peak Found	High	1		2	3	Present Both	1	GLYMA_06G045100	GLYMA_06G045100	sp|O65351|SBT17_ARATH	Subtilisin-like protease SBT1.7 GN=SBT1.7	ident:486/769 pos:583/769 query:769 hit:757 align:739 bit:994.6	OK	Subtilisin-like protease SBT1.7	Cucumisin-like serine protease; Subtilase subfamily 1 member 7 (AtSBT1.7); Subtilisin-like serine protease 1 (At-SLP1)	SBT17_ARATH	O65351	P80854; Q39007; Q8RWQ7	SBT1.7	na	Arabidopsis thaliana (Mouse-ear cress)	3702
High	Master Protein	GLYMA_05G103200	PTHR10795//PTHR10795:SF388 - PROPROTEIN CONVERTASE SUBTILISIN/KEXIN // SUBFAMILY NOT NAMED (1 of 8)	0	3.373	1	1	2	1	755	79.6	6.6	3.49	1	0	0.796	0.878255	36.88	96.9	103.1	59.77	60.62	High	Peak Found	Peak Found	High	Peak Found	Not Found	1		3	2	Present Both	1	GLYMA_05G103200	GLYMA_05G103200	sp|O65351|SBT17_ARATH	Subtilisin-like protease SBT1.7 GN=SBT1.7	ident:534/755 pos:628/755 query:755 hit:757 align:755 bit:1114.0	OK	Subtilisin-like protease SBT1.7	Cucumisin-like serine protease; Subtilase subfamily 1 member 7 (AtSBT1.7); Subtilisin-like serine protease 1 (At-SLP1)	SBT17_ARATH	O65351	P80854; Q39007; Q8RWQ7	SBT1.7	na	Arabidopsis thaliana (Mouse-ear cress)	3702
High	Master Protein	GLYMA_12G031800	PTHR10795//PTHR10795:SF442 - PROPROTEIN CONVERTASE SUBTILISIN/KEXIN // SUBFAMILY NOT NAMED (1 of 3)	0	51.137	13	7	17	3	773	81.9	9.1	44.58	7	4	0.854	0.907515	58.08	127.9	72.1	73.32	114.52	High	High	Not Found	Peak Found	Not Found	High	1		2	2	Present Both	1	GLYMA_12G031800	GLYMA_12G031800	sp|O49607|SBT16_ARATH	Subtilisin-like protease SBT1.6 GN=SBT1.6	ident:573/773 pos:661/773 query:773 hit:764 align:764 bit:1199.1	OK	Subtilisin-like protease SBT1.6	Subtilase subfamily 1 member 6 (AtSBT1.6); Subtilisin-like serine protease 2 (At-SLP2)	SBT16_ARATH	O49607	na	SBT1.6	na	Arabidopsis thaliana (Mouse-ear cress)	3702
High	Master Protein	GLYMA_02G158200	PTHR10795:SF316 - SERINE PROTEASE-LIKE PROTEIN-RELATED (1 of 3)	0	96.703	38	6	22	6	136	14.7	6.52	91.04	6	0	0.414	0.359525	4.19	176.9	23.1	77.18	79.55	High	High	Peak Found	High	High	High	1		3	3	Present Both	1	GLYMA_02G158200	GLYMA_02G158200	sp|Q8L7I2|SBT36_ARATH	Subtilisin-like protease SBT3.6 GN=SBT3.6	ident:43/136 pos:66/136 query:136 hit:778 align:113 bit:75.5	Partial_match_hit	Subtilisin-like protease SBT3.6	Subtilase subfamily 3 member 6 (AtSBT3.6)	SBT36_ARATH	Q8L7I2	A8MS13; F4JMC8; Q0WVJ9; Q9T0B5; Q9ZSB3	SBT3.6	na	Arabidopsis thaliana (Mouse-ear cress)	3702
High	Master Protein	GLYMA_16G201700	PTHR10795:SF322 - SUBTILISIN SERINE PROTEASE-RELATED (1 of 5)	0	9.152	1	1	5	1	781	83.9	9.06	15.66	1	0	0.569	0.640463	6.77	127.5	72.5	53.92	0.07	High	High	High	High	High	Not Found	1		3	2	Present Both	1	GLYMA_16G201700	GLYMA_16G201700	sp|Q9FLI4|SBT13_ARATH	Subtilisin-like protease SBT1.3 GN=SBT1.3	ident:528/781 pos:627/781 query:781 hit:780 align:772 bit:1105.9	OK	Subtilisin-like protease SBT1.3	Subtilase subfamily 1 member 3 (AtSBT1.3)	SBT13_ARATH	Q9FLI4	na	SBT1.3	na	Arabidopsis thaliana (Mouse-ear cress)	3702
High	Master Protein	GLYMA_09G070000	PTHR10795:SF434 - SUBTILISIN SERINE PROTEASE-RELATED (1 of 4)	0	19.837	5	2	2	2	770	82	7.83	6.86	2	0	0.654	0.799527	26.76	163.3	36.7	29.67	58.84	High	High	Peak Found	Peak Found	Peak Found	Not Found	1		3	2	Present Both	1	GLYMA_09G070000	GLYMA_09G070000	sp|Q9ZUF6|SBT18_ARATH	Subtilisin-like protease SBT1.8 GN=SBT1.8	ident:516/770 pos:605/770 query:770 hit:754 align:757 bit:1045.0	OK	Subtilisin-like protease SBT1.8	Subtilase subfamily 1 member 8 (AtSBT1.8)	SBT18_ARATH	Q9ZUF6	na	SBT1.8	na	Arabidopsis thaliana (Mouse-ear cress)	3702
High	Master Protein	GLYMA_07G253200	PTHR10869:SF64 - OXIDOREDUCTASE, 2OG-FE(II) OXYGENASE FAMILY PROTEIN-RELATED (1 of 4)	0	67.922	37	10	28	7	297	32.8	6.96	66.34	10	3	1.673	0.73785	77.17	92.8	107.2	35.45	126.71	High	High	High	High	High	High	1		3	3	Present Both	1	GLYMA_07G253200	GLYMA_07G253200	sp|Q8LAN3|P4H4_ARATH	Probable prolyl 4-hydroxylase 4 GN=P4H4	ident:206/297 pos:237/297 query:297 hit:298 align:267 bit:448.7	OK	Probable prolyl 4-hydroxylase 4 (AtP4H4)	na	P4H4_ARATH	Q8LAN3	Q8RWK0	P4H4	na	Arabidopsis thaliana (Mouse-ear cress)	3702
High	Master Protein	GLYMA_03G003600	PTHR10903 - GTPASE, IMAP FAMILY MEMBER-RELATED (1 of 14)	0	14.879	12	3	4	3	313	34.9	9.33	11.39	3	0	0.51	0.552188	10.15	30.2	169.8	121.11	122.4	High	High	Peak Found	High	Peak Found	High	1		3	3	Present Both	1	GLYMA_03G003600	GLYMA_03G003600	sp|Q38906|TOC34_ARATH	Translocase of chloroplast 34, chloroplastic GN=TOC34	ident:205/313 pos:255/313 query:313 hit:313 align:309 bit:441.4	OK	Translocase of chloroplast 34, chloroplastic (AtToc34)	34 kDa chloroplast outer envelope protein; GTP-binding protein OEP34; Plastid protein import 3	TOC34_ARATH	Q38906	Q0WNL4; Q8L9G5; Q9FF74; Q9GDD2	TOC34	OEP34; PPI3	Arabidopsis thaliana (Mouse-ear cress)	3702
High	Master Protein	GLYMA_05G166300	PTHR10903:SF39 - TRANSLOCASE OF CHLOROPLAST 159, CHLOROPLASTIC (1 of 3)	0	31.425	5	4	8	2	1240	133.3	4.61	24.63	4	1	0.635	0.731788	14.59	130.7	69.3	45.22	31.96	High	High	High	High	Peak Found	High	1		3	3	Present Both	1	GLYMA_05G166300	GLYMA_05G166300	sp|O81283|TC159_ARATH	Translocase of chloroplast 159, chloroplastic GN=TOC159	ident:609/1240 pos:737/1240 query:1240 hit:1503 align:890 bit:1218.8	Poor_match	Translocase of chloroplast 159, chloroplastic (AtToc159)	159 kDa chloroplast outer envelope protein; Plastid protein import 2; Translocase of chloroplast 160, chloroplastic (AtToc160); Translocase of chloroplast 86, chloroplastic (AtToc86)	TC159_ARATH	O81283	O22774; Q56W83; Q945M4	TOC159	PPI2; TOC160; TOC86	Arabidopsis thaliana (Mouse-ear cress)	3702
High	Master Protein	GLYMA_08G124300	PTHR10903:SF39 - TRANSLOCASE OF CHLOROPLAST 159, CHLOROPLASTIC (1 of 3)	0	27.248	5	3	4	1	1185	127.8	4.65	13.99	3	0	0.48	0.556058	5.8	135.1	64.9	23.68		High	High	Not Found	Not Found	Peak Found	Not Found	1		2	1	Only Control	1	GLYMA_08G124300	GLYMA_08G124300	sp|O81283|TC159_ARATH	Translocase of chloroplast 159, chloroplastic GN=TOC159	ident:597/1185 pos:729/1185 query:1185 hit:1503 align:889 bit:1192.2	OK	Translocase of chloroplast 159, chloroplastic (AtToc159)	159 kDa chloroplast outer envelope protein; Plastid protein import 2; Translocase of chloroplast 160, chloroplastic (AtToc160); Translocase of chloroplast 86, chloroplastic (AtToc86)	TC159_ARATH	O81283	O22774; Q56W83; Q945M4	TOC159	PPI2; TOC160; TOC86	Arabidopsis thaliana (Mouse-ear cress)	3702
High	Master Protein	GLYMA_19G235000	PTHR10992:SF773 - PROTEIN AUXIN RESPONSE 4 (1 of 2)	0	32.269	5	3	9	3	480	53	6.79	27.97	3	0	1.287	0.907515	93.73	102.5	97.5	11.74	121.7	High	High	Not Found	High	High	High	1		2	3	Present Both	1	GLYMA_19G235000	GLYMA_19G235000	sp|Q9FZ33|AXR4_ARATH	Protein AUXIN RESPONSE 4 GN=AXR4	ident:252/480 pos:331/480 query:480 hit:473 align:487 bit:464.5	OK	Protein AUXIN RESPONSE 4	na	AXR4_ARATH	Q9FZ33	Q944Q7	AXR4	na	Arabidopsis thaliana (Mouse-ear cress)	3702
High	Master Protein	GLYMA_08G304100	PTHR10994:SF62 - RETICULON-LIKE PROTEIN B8 (1 of 4)	0	27.351	15	2	2	2	243	27	8.29	8.26	2	0	1.017	0.903887	122.82	75.3	124.7	76.69	119.66	High	Peak Found	Peak Found	Peak Found	Not Found	High	1		3	2	Present Both	1	GLYMA_08G304100	GLYMA_08G304100	sp|Q9SS37|RTNLH_ARATH	Reticulon-like protein B8 GN=RTNLB8	ident:142/243 pos:179/243 query:243 hit:247 align:242 bit:293.5	OK	Reticulon-like protein B8 (AtRTNLB8)	na	RTNLH_ARATH	Q9SS37	Q3EB99	RTNLB8	na	Arabidopsis thaliana (Mouse-ear cress)	3702
High	Master Protein	GLYMA_19G007700	PTHR11002:SF7 - CARBONIC ANHYDRASE 2, CHLOROPLASTIC-RELATED (1 of 2)	0	23.191	6	3	4	3	341	36.7	7.43	14.66	3	0	0.417	0.426557	1.09	118.2	81.8	101.44		High	High	Peak Found	High	Not Found	Not Found	1		3	1	Only Control	1	GLYMA_19G007700	GLYMA_19G007700	sp|P27140|BCA1_ARATH	Beta carbonic anhydrase 1, chloroplastic GN=BCA1	ident:234/341 pos:280/341 query:341 hit:347 align:347 bit:445.3	OK	Beta carbonic anhydrase 1, chloroplastic (AtbCA1; AtbetaCA1)	Beta carbonate dehydratase 1; Protein SALICYLIC ACID-BINDING PROTEIN 3 (AtSABP3)	BCA1_ARATH	P27140	Q0WWA9; Q56WK1; Q8RWW2; Q93VR8	BCA1	na	Arabidopsis thaliana (Mouse-ear cress)	3702
High	Master Protein	GLYMA_13G339700	PTHR11038//PTHR11038:SF17 - MITOCHONDRIAL IMPORT INNER MEMBRANE TRANSLOCASE SUBUNIT TIM10 // SUBFAMILY NOT NAMED (1 of 1)	0	70.399	46	3	31	1	84	9.7	7.05	109.01	3	0	0.784	0.865662	45.78	86.2	113.8	55.1	67.19	High	High	High	High	High	Not Found	1		3	2	Present Both	1	GLYMA_13G339700	GLYMA_13G339700	sp|Q9ZW33|TIM10_ARATH	Mitochondrial import inner membrane translocase subunit TIM10 GN=TIM10	ident:60/84 pos:69/84 query:84 hit:83 align:84 bit:132.5	OK	Mitochondrial import inner membrane translocase subunit TIM10	na	TIM10_ARATH	Q9ZW33	na	TIM10	na	Arabidopsis thaliana (Mouse-ear cress)	3702
High	Master Protein	GLYMA_18G062900	PTHR11071//PTHR11071:SF291 - PEPTIDYL-PROLYL CIS-TRANS ISOMERASE // SUBFAMILY NOT NAMED (1 of 4)	0	70.787	43	7	20	4	204	21.9	9.17	49.92	7	3	2.804	0.29656	115.86	55.3	144.7	108.41	109.69	High	High	High	High	High	High	1		3	3	Present Both	1	GLYMA_18G062900	GLYMA_18G062900	sp|Q8LDP4|CP19D_ARATH	Peptidyl-prolyl cis-trans isomerase CYP19-4 GN=CYP19-4	ident:174/204 pos:187/204 query:204 hit:201 align:204 bit:358.2	OK	Peptidyl-prolyl cis-trans isomerase CYP19-4 (PPIase CYP19-4)	Cyclophilin of 19 kDa 4; Cyclophilin-5; Rotamase CYP19-4	CP19D_ARATH	Q8LDP4	A8MS66; O22515; O80876	CYP19-4	CYP5	Arabidopsis thaliana (Mouse-ear cress)	3702
High	Master Protein	GLYMA_20G249300	PTHR11071:SF11 - PEPTIDYL-PROLYL CIS-TRANS ISOMERASE C (1 of 2)	0	76.27	35	6	23	6	253	27.1	9.48	81.37	6	0	0.55	0.609299	14.16	124.9	75.1	8.8	32.14	High	High	High	High	High	Peak Found	1		3	3	Present Both	1	GLYMA_20G249300	GLYMA_20G249300	sp|Q9ASS6|PNSL5_ARATH	Photosynthetic NDH subunit of lumenal location 5, chloroplastic GN=PNSL5	ident:147/253 pos:165/253 query:253 hit:259 align:180 bit:326.6	OK	Photosynthetic NDH subunit of lumenal location 5, chloroplastic	Cyclophilin of 20 kDa 2; Peptidyl-prolyl cis-trans isomerase CYP20-2 (PPIase CYP20-2); Rotamase CYP20-2; Thylakoid lumen PPIase of 20 kDa (TLP20)	PNSL5_ARATH	Q9ASS6	F4K2G0; Q53YK9; Q8L9L5; Q9FY98	PNSL5	CYP20-2	Arabidopsis thaliana (Mouse-ear cress)	3702
High	Master Protein	GLYMA_06G249300	PTHR11071:SF174 - PEPTIDYL-PROLYL CIS-TRANS ISOMERASE CYP37, CHLOROPLASTIC (1 of 2)	0	13.328	6	2	7	1	439	47.3	6.6	22.05	2	0	0.706	0.804759	29.87	111	89	63.87	65.43	High	High	High	High	High	Peak Found	1		3	3	Present Both	1	GLYMA_06G249300	GLYMA_06G249300	sp|P82869|CYP37_ARATH	Peptidyl-prolyl cis-trans isomerase CYP37, chloroplastic GN=CYP37	ident:263/439 pos:306/439 query:439 hit:466 align:346 bit:542.7	OK	Peptidyl-prolyl cis-trans isomerase CYP37, chloroplastic (PPIase CYP37)	Rotamase CYP37; Thylakoid lumen PPIase of 38 kDa (TLP38; p38)	CYP37_ARATH	P82869	Q1JPN6; Q9LDZ3	CYP37	na	Arabidopsis thaliana (Mouse-ear cress)	3702
High	Master Protein	GLYMA_13G169500	PTHR11071:SF236 - PEPTIDYL-PROLYL CIS-TRANS ISOMERASE CYP38, CHLOROPLASTIC (1 of 2)	0	32.106	10	5	15	5	445	48.7	5.2	32.88	5	0	0.923	0.952604	67.64	96.4	103.6	62.87	48.15	High	High	High	High	High	Peak Found	1		3	3	Present Both	1	GLYMA_13G169500	GLYMA_13G169500	sp|Q9SSA5|CYP38_ARATH	Peptidyl-prolyl cis-trans isomerase CYP38, chloroplastic GN=CYP38	ident:322/445 pos:372/445 query:445 hit:437 align:428 bit:661.0	OK	Peptidyl-prolyl cis-trans isomerase CYP38, chloroplastic (PPIase CYP38)	Rotamase CYP38; Thylakoid lumen PPIase	CYP38_ARATH	Q9SSA5	B3H5B8; B9DHS6	CYP38	na	Arabidopsis thaliana (Mouse-ear cress)	3702
High	Master Protein	GLYMA_17G122500	PTHR11071:SF244 - CYCLOPHILIN-LIKE PEPTIDYL-PROLYL CIS-TRANS ISOMERASE FAMILY PROTEIN (1 of 2)	0	42.713	22	6	21	2	350	38.2	5.71	54.7	6	0	0.691	0.797038	39.15	107.6	92.4	39.96	71.75	High	High	High	Peak Found	High	Peak Found	1		3	3	Present Both	1	GLYMA_17G122500	GLYMA_17G122500	sp|F4HTT6|CP26B_ARATH	Peptidyl-prolyl cis-trans isomerase CYP26-2, chloroplastic GN=CYP26-2	ident:155/350 pos:184/350 query:350 hit:317 align:232 bit:314.3	Poor_match	Peptidyl-prolyl cis-trans isomerase CYP26-2, chloroplastic (PPIase CYP26-2)	Cyclophilin of 26 kDa 2; Cyclophilin-26-2	CP26B_ARATH	F4HTT6	Q8W4C6; Q9C9C7	CYP26-2	na	Arabidopsis thaliana (Mouse-ear cress)	3702
High	Master Protein	GLYMA_19G222600	PTHR11071:SF247 - PEPTIDYL-PROLYL CIS-TRANS ISOMERASE D (1 of 3)	0	7.64	5	1	3	1	260	28.3	8.6	7.79	1	0	0.583	0.686947	5.76	126.3	73.7	38.42		High	High	Peak Found	High	Not Found	Not Found	1		3	1	Only Control	1	GLYMA_19G222600	GLYMA_19G222600	sp|P34791|CP20C_ARATH	Peptidyl-prolyl cis-trans isomerase CYP20-3, chloroplastic GN=CYP20-3	ident:169/260 pos:198/260 query:260 hit:260 align:266 bit:328.9	OK	Peptidyl-prolyl cis-trans isomerase CYP20-3, chloroplastic (PPIase CYP20-3)	Cyclophilin of 20 kDa 3; Cyclosporin A-binding protein; Rotamase CYP20-3; Rotamase cyclophilin-4	CP20C_ARATH	P34791	Q8LBZ9; Q9FPH5	CYP20-3	ROC4	Arabidopsis thaliana (Mouse-ear cress)	3702
High	Master Protein	GLYMA_12G024700	PTHR11071:SF252 - PEPTIDYL-PROLYL CIS-TRANS ISOMERASE CYP18-3-RELATED (1 of 4)	0	83.146	35	5	26	2	172	18.1	7.83	80.07	5	0	1.36	0.866034	55.44	72.1	127.9	52.44	22.75	High	High	High	High	High	High	1		3	3	Present Both	1	GLYMA_12G024700	GLYMA_12G024700	sp|Q38900|CP19A_ARATH	Peptidyl-prolyl cis-trans isomerase CYP19-1 GN=CYP19-1	ident:144/172 pos:158/172 query:172 hit:173 align:170 bit:312.0	OK	Peptidyl-prolyl cis-trans isomerase CYP19-1 (PPIase CYP19-1)	Cyclophilin of 19 kDa 1; Rotamase cyclophilin-3	CP19A_ARATH	Q38900	F4IL99	CYP19-1	ROC3	Arabidopsis thaliana (Mouse-ear cress)	3702
High	Master Protein	GLYMA_11G098700	PTHR11071:SF264 - PEPTIDYL-PROLYL CIS-TRANS ISOMERASE CYP19-1 (1 of 3)	0	59.511	32	5	24	2	172	18.2	8.46	69.9	5	2	1.093	0.974587	69.8	68.3	131.7	42.93	42.68	High	High	High	High	High	High	1		3	3	Present Both	1	GLYMA_11G098700	GLYMA_11G098700	sp|Q38900|CP19A_ARATH	Peptidyl-prolyl cis-trans isomerase CYP19-1 GN=CYP19-1	ident:149/172 pos:161/172 query:172 hit:173 align:170 bit:320.9	OK	Peptidyl-prolyl cis-trans isomerase CYP19-1 (PPIase CYP19-1)	Cyclophilin of 19 kDa 1; Rotamase cyclophilin-3	CP19A_ARATH	Q38900	F4IL99	CYP19-1	ROC3	Arabidopsis thaliana (Mouse-ear cress)	3702
High	Master Protein	GLYMA_12G181900	PTHR11119:SF28 - NUCLEOBASE-ASCORBATE TRANSPORTER 12 (1 of 4)	0	3.349	2	1	1	1	694	74.8	9.42	2.89	1	0	0.769	0.862324	4.43	113.1	86.9	1.57	34.56	High	Peak Found	Peak Found	Peak Found	Peak Found	Peak Found	1		3	3	Present Both	1	GLYMA_12G181900	GLYMA_12G181900	sp|Q3E7D0|NAT12_ARATH	Nucleobase-ascorbate transporter 12 GN=NAT12	ident:509/694 pos:582/694 query:694 hit:709 align:699 bit:963.8	OK	Nucleobase-ascorbate transporter 12 (AtNAT12)	na	NAT12_ARATH	Q3E7D0	Q8LPL9; Q9ZUY2	NAT12	na	Arabidopsis thaliana (Mouse-ear cress)	3702
High	Master Protein	GLYMA_16G041700	PTHR11122:SF18 - NDH-DEPENDENT CYCLIC ELECTRON FLOW 1 (1 of 2)	0	15.528	9	2	4	2	359	39.3	8.54	11.25	2	0	0.01	6.62973e-17		200		20.42		High	High	Not Found	Not Found	Not Found	Not Found	1		2	0	Only Control	1	GLYMA_16G041700	GLYMA_16G041700	sp|Q94AQ8|PNSB2_ARATH	Photosynthetic NDH subunit of subcomplex B 2, chloroplastic GN=PNSB2	ident:214/359 pos:263/359 query:359 hit:348 align:360 bit:412.5	OK	Photosynthetic NDH subunit of subcomplex B 2, chloroplastic (Protein PnsB2)	NAD(P)H DEHYDROGENASE SUBUNIT 45; NDH-DEPENDENT CYCLIC ELECTRON FLOW 2	PNSB2_ARATH	Q94AQ8	Q9XIR6	PNSB2	na	Arabidopsis thaliana (Mouse-ear cress)	3702
High	Master Protein	GLYMA_13G175100	PTHR11132//PTHR11132:SF102 - SOLUTE CARRIER FAMILY 35 // SUBFAMILY NOT NAMED (1 of 2)	0	2.883	2	1	2	1	406	44	9.44	4.31	1	0	0.425	0.460316	0.76	140.4	59.6	4.04		High	High	Not Found	Peak Found	Not Found	Not Found	1		2	1	Only Control	1	GLYMA_13G175100	GLYMA_13G175100	sp|Q9ZSR7|TPT_ARATH	Triose phosphate/phosphate translocator TPT, chloroplastic GN=TPT	ident:325/406 pos:358/406 query:406 hit:410 align:419 bit:634.0	OK	Triose phosphate/phosphate translocator TPT, chloroplastic	Protein ACCLIMATION OF PHOTOSYNTHESIS TO ENVIRONMENT 2	TPT_ARATH	Q9ZSR7	Q56WK8; Q8LB04; Q93ZM3; Q9FNL1	TPT	APE2	Arabidopsis thaliana (Mouse-ear cress)	3702
High	Master Protein	GLYMA_07G201300	PTHR11132//PTHR11132:SF102 - SOLUTE CARRIER FAMILY 35 // SUBFAMILY NOT NAMED (1 of 2)	0	2.755	2	1	3	1	406	44	9.45	3.64	1	0	1.491	0.874801	54.47	80.3	119.7	15.77	56.15	High	High	Peak Found	Peak Found	High	Peak Found	1		3	3	Present Both	1	GLYMA_07G201300	GLYMA_07G201300	sp|Q9ZSR7|TPT_ARATH	Triose phosphate/phosphate translocator TPT, chloroplastic GN=TPT	ident:324/406 pos:360/406 query:406 hit:410 align:418 bit:634.8	OK	Triose phosphate/phosphate translocator TPT, chloroplastic	Protein ACCLIMATION OF PHOTOSYNTHESIS TO ENVIRONMENT 2	TPT_ARATH	Q9ZSR7	Q56WK8; Q8LB04; Q93ZM3; Q9FNL1	TPT	APE2	Arabidopsis thaliana (Mouse-ear cress)	3702
High	Master Protein	GLYMA_09G246300	PTHR11177:SF167 - RHODANESE-LIKE DOMAIN-CONTAINING PROTEIN 4, CHLOROPLASTIC (1 of 4)	0	13.949	8	1	1	1	342	37.9	8.54	5.14	1	0	0.01	6.62973e-17		200		13.03		High	Peak Found	Not Found	Not Found	Not Found	Not Found	1		2	0	Only Control	1	GLYMA_09G246300	GLYMA_09G246300	sp|Q56XR7|STR4A_ARATH	Rhodanese-like domain-containing protein 4A, chloroplastic GN=STR4A	ident:135/342 pos:169/342 query:342 hit:264 align:257 bit:236.9	Poor_match	Rhodanese-like domain-containing protein 4A, chloroplastic	Sulfurtransferase 4A (AtStr4a)	STR4A_ARATH	Q56XR7	Q8LA89; Q9LSV4	STR4A	na	Arabidopsis thaliana (Mouse-ear cress)	3702
High	Master Protein	GLYMA_18G050300	PTHR11208//PTHR11208:SF42 - RNA-BINDING PROTEIN RELATED // SUBFAMILY NOT NAMED (1 of 4)	0	3.024	3	1	2	1	283	32.1	8.72	4.02	1	0	1.266	0.952604	126.58	88.2	111.8	28.3	99.21	High	Peak Found	High	Peak Found	Peak Found	Peak Found	1		3	3	Present Both	1	GLYMA_18G050300	GLYMA_18G050300	sp|Q9ZVI3|QKIL3_ARATH	KH domain-containing protein At2g38610 GN=QCR7-1	ident:199/283 pos:225/283 query:283 hit:286 align:289 bit:372.9	OK	KH domain-containing protein At2g38610	Quaking-like protein 3	QKIL3_ARATH	Q9ZVI3	na	OrderedLocusNames=At2g38610	na	Arabidopsis thaliana (Mouse-ear cress)	3702
High	Master Protein	GLYMA_06G016700	PTHR11216:SF72 - CALCIUM-BINDING EF HAND-CONTAINING PROTEIN (1 of 5)	0	19.936	4	3	5	3	1076	117	5.39	12.88	3	0	1.147	0.992627	71.29	81.5	118.5	66.48	70.89	High	High	Peak Found	High	Peak Found	High	1		3	3	Present Both	1	GLYMA_06G016700	GLYMA_06G016700	sp|B3LF48|EHD2_ARATH	EH domain-containing protein 2 GN=EHD2	ident:37/1076 pos:55/1076 query:1076 hit:546 align:80 bit:82.8	Partial_match_both	EH domain-containing protein 2 (AtEHD2)	na	EHD2_ARATH	B3LF48	F4JGH2; Q9S9W1	EHD2	na	Arabidopsis thaliana (Mouse-ear cress)	3702
High	Master Protein	GLYMA_01G109500	PTHR11220 - HEME-BINDING PROTEIN-RELATED (1 of 13)	0	10.382	11	2	3	2	213	23.2	8.16	7.25	2	0	0.295	0.193692	0.34	159.6	40.4	10.23		High	High	Peak Found	Peak Found	Not Found	Not Found	1		3	1	Only Control	1	GLYMA_01G109500	GLYMA_01G109500	sp|Q9SR77|HBPL1_ARATH	Heme-binding-like protein At3g10130, chloroplastic GN=FLS2	ident:74/213 pos:108/213 query:213 hit:309 align:210 bit:88.2	Poor_match	Heme-binding-like protein At3g10130, chloroplastic	na	HBPL1_ARATH	Q9SR77	Q8L605	OrderedLocusNames=At3g10130	na	Arabidopsis thaliana (Mouse-ear cress)	3702
High	Master Protein	GLYMA_17G087500	PTHR11220 - HEME-BINDING PROTEIN-RELATED (1 of 13)	0	9.228	11	2	5	2	213	23.6	8.87	12.16	2	0	2.317	0.561352	188.81	60.3	139.7	6.72	113.2	High	High	Not Found	Peak Found	Not Found	High	1		2	2	Present Both	1	GLYMA_17G087500	GLYMA_17G087500	sp|Q9SR77|HBPL1_ARATH	Heme-binding-like protein At3g10130, chloroplastic GN=FLS2	ident:42/213 pos:73/213 query:213 hit:309 align:154 bit:45.1	Partial_match_hit	Heme-binding-like protein At3g10130, chloroplastic	na	HBPL1_ARATH	Q9SR77	Q8L605	OrderedLocusNames=At3g10130	na	Arabidopsis thaliana (Mouse-ear cress)	3702
High	Master Protein	GLYMA_04G002300	PTHR11229:SF5 - 50S RIBOSOMAL PROTEIN L3-1, CHLOROPLASTIC (1 of 2)	0	94.285	41	10	20	10	263	28.8	10.45	50.41	10	0	0.983	0.973607	60.28	104.2	95.8	27.23	47.53	High	High	High	High	High	Peak Found	1		3	3	Present Both	1	GLYMA_04G002300	GLYMA_04G002300	sp|Q9SKX4|RK3A_ARATH	50S ribosomal protein L3-1, chloroplastic GN=RPL3A	ident:203/263 pos:230/263 query:263 hit:271 align:267 bit:379.4	OK	50S ribosomal protein L3-1, chloroplastic	na	RK3A_ARATH	Q9SKX4	Q8LEQ9	RPL3A	na	Arabidopsis thaliana (Mouse-ear cress)	3702
High	Master Protein	GLYMA_10G083300	PTHR11306//PTHR11306:SF12 - NIEMANN PICK TYPE C2 PROTEIN NPC2-RELATED // SUBFAMILY NOT NAMED (1 of 2)	0	9.272	9	1	3	1	154	16.7	5.43	7.99	1	0	1.545	0.865662	10.42	78.6	121.4	45.69		High	High	High	Not Found	Peak Found	Not Found	1		3	1	Only Control	1	GLYMA_10G083300	GLYMA_10G083300	sp|Q9AST8|ROSY1_ARATH	MD-2-related lipid-recognition protein ROSY1 GN=ROSY1	ident:40/154 pos:62/154 query:154 hit:160 align:139 bit:57.4	Poor_match	MD-2-related lipid-recognition protein ROSY1	Protein INTERACTOR OF SYNAPTOTAGMIN 1	ROSY1_ARATH	Q9AST8	Q8L8M3	ROSY1	na	Arabidopsis thaliana (Mouse-ear cress)	3702
High	Master Protein	GLYMA_05G216700	PTHR11349:SF53 - NUCLEOSIDE DIPHOSPHATE KINASE-RELATED (1 of 2)	0	130.204	40	14	73	14	235	25.2	9.13	199.97	14	0	1.32	0.879779	123.12	39	161	97.87	62.98	High	High	High	High	High	High	1		3	3	Present Both	1	GLYMA_05G216700	GLYMA_05G216700	sp|Q8LAH8|NDK4_ARATH	Nucleoside diphosphate kinase IV, chloroplastic/mitochondrial GN=NDK4	ident:187/235 pos:213/235 query:235 hit:237 align:242 bit:383.6	OK	Nucleoside diphosphate kinase IV, chloroplastic/mitochondrial (NDK IV; NDP kinase IV; NDPK IV)	Nucleoside diphosphate kinase 4	NDK4_ARATH	Q8LAH8	Q9T0A5	NDK4	na	Arabidopsis thaliana (Mouse-ear cress)	3702
High	Master Protein	GLYMA_10G193200	PTHR11353//PTHR11353:SF80 - CHAPERONIN // SUBFAMILY NOT NAMED (1 of 4)	0	174.707	26	13	30	3	577	61.4	5.9	89.08	13	0	1.543	0.820372	93.91	63.8	136.2	19.07	118.75	High	High	High	High	High	High	1		3	3	Present Both	1	GLYMA_10G193200	GLYMA_10G193200	sp|P29197|CH60A_ARATH	Chaperonin CPN60, mitochondrial GN=CPN60	ident:500/577 pos:544/577 query:577 hit:577 align:562 bit:1013.5	OK	Chaperonin CPN60, mitochondrial	HSP60	CH60A_ARATH	P29197	Q9LIQ8	CPN60	na	Arabidopsis thaliana (Mouse-ear cress)	3702
High	Master Protein	GLYMA_12G078100	PTHR11353:SF11 - CHAPERONIN 60 SUBUNIT ALPHA 1, CHLOROPLASTIC (1 of 2)	0	449.378	45	32	139	31	584	61.7	5.4	500.98	32	1	0.671	0.774769	33.81	128.5	71.5	6.76	41.13	High	High	High	High	High	High	1		3	3	Present Both	1	GLYMA_12G078100	GLYMA_12G078100	sp|P21238|CPNA1_ARATH	Chaperonin 60 subunit alpha 1, chloroplastic GN=CPN60A1	ident:486/584 pos:524/584 query:584 hit:586 align:556 bit:950.7	OK	Chaperonin 60 subunit alpha 1, chloroplastic (CPN-60 alpha 1)	Protein SCHLEPPERLESS; RuBisCO large subunit-binding protein subunit alpha 1	CPNA1_ARATH	P21238	Q42554; Q56WB8; Q8L5U4	CPN60A1	Cpn60-A(2); SLP	Arabidopsis thaliana (Mouse-ear cress)	3702
High	Master Protein	GLYMA_15G250500	PTHR11353:SF8 - CHAPERONIN 60 SUBUNIT BETA 1, CHLOROPLASTIC-RELATED (1 of 3)	0	332.39	32	22	103	1	591	62.8	5.87	424.74	22	0	0.741	0.850813	50.96	114.9	85.1	31.7	69.88	High	High	High	High	High	Peak Found	1		3	3	Present Both	1	GLYMA_15G250500	GLYMA_15G250500	sp|Q9LJE4|CPNB2_ARATH	Chaperonin 60 subunit beta 2, chloroplastic GN=CPN60B2	ident:527/591 pos:560/591 query:591 hit:596 align:597 bit:1027.3	OK	Chaperonin 60 subunit beta 2, chloroplastic (CPN-60 beta 2)	na	CPNB2_ARATH	Q9LJE4	na	CPN60B2	Cpn60-B(2)	Arabidopsis thaliana (Mouse-ear cress)	3702
High	Master Protein	GLYMA_08G175900	PTHR11353:SF8 - CHAPERONIN 60 SUBUNIT BETA 1, CHLOROPLASTIC-RELATED (1 of 3)	0	328.497	36	24	100	3	592	62.8	6.04	412.98	24	18	0.402	0.332527	11.51	132.3	67.7	33.14	31.05	High	Not Found	Not Found	Not Found	Not Found	Not Found	1		1	0	Missing Both	1	GLYMA_08G175900	GLYMA_08G175900	sp|Q9LJE4|CPNB2_ARATH	Chaperonin 60 subunit beta 2, chloroplastic GN=CPN60B2	ident:525/592 pos:559/592 query:592 hit:596 align:597 bit:1023.5	OK	Chaperonin 60 subunit beta 2, chloroplastic (CPN-60 beta 2)	na	CPNB2_ARATH	Q9LJE4	na	CPN60B2	Cpn60-B(2)	Arabidopsis thaliana (Mouse-ear cress)	3702
High	Master Protein	GLYMA_15G261900	PTHR11406:SF8 - PHOSPHOGLYCERATE KINASE 1, CHLOROPLASTIC-RELATED (1 of 2)	0	166.444	39	16	50	4	483	50	8.15	160.32	16	11	0.464	0.474719	18.16	141.6	58.4	51.79	29.06	High	High	High	High	High	Peak Found	1		3	3	Present Both	1	GLYMA_15G261900	GLYMA_15G261900	sp|Q9LD57|PGKH1_ARATH	Phosphoglycerate kinase 1, chloroplastic GN=PGK1	ident:400/483 pos:441/483 query:483 hit:481 align:486 bit:771.5	OK	Phosphoglycerate kinase 1, chloroplastic	na	PGKH1_ARATH	Q9LD57	na	PGK1	na	Arabidopsis thaliana (Mouse-ear cress)	3702
High	Master Protein	GLYMA_08G165500	PTHR11406:SF8 - PHOSPHOGLYCERATE KINASE 1, CHLOROPLASTIC-RELATED (1 of 2)	0	158.347	41	14	46	1	485	50.2	8.13	146.14	14	0	0.408	0.346277	7.69	149.4	50.6	26.41	49.67	High	High	Peak Found	High	Peak Found	Not Found	1		3	2	Present Both	1	GLYMA_08G165500	GLYMA_08G165500	sp|P50318|PGKH2_ARATH	Phosphoglycerate kinase 2, chloroplastic GN=PGK1	ident:385/485 pos:417/485 query:485 hit:478 align:441 bit:771.2	OK	Phosphoglycerate kinase 2, chloroplastic	na	PGKH2_ARATH	P50318	Q42542; Q9C7J4; Q9SGU6	OrderedLocusNames=At1g56190	na	Arabidopsis thaliana (Mouse-ear cress)	3702
High	Master Protein	GLYMA_15G115300	PTHR11413 - CYSTATIN FAMILY MEMBER (1 of 20)	0	6.997	13	1	2	1	112	12.4	9.03	3.61	1	0	0.377	0.318025	11.39	151.7	48.3	76.22	62.29	High	Peak Found	Not Found	Peak Found	High	Peak Found	1		2	3	Present Both	1	GLYMA_15G115300	GLYMA_15G115300	sp|Q41916|CYT5_ARATH	Cysteine proteinase inhibitor 5 GN=CYS5	ident:53/112 pos:68/112 query:112 hit:122 align:96 bit:112.1	Poor_match	Cysteine proteinase inhibitor 5 (AtCYS-5)	na	CYT5_ARATH	Q41916	Q8LBN6; Q9FGK2	CYS5	na	Arabidopsis thaliana (Mouse-ear cress)	3702
High	Master Protein	GLYMA_20G045500	PTHR11413//PTHR11413:SF50 - CYSTATIN FAMILY MEMBER // SUBFAMILY NOT NAMED (1 of 4)	0	196.591	92	15	74	6	97	10.7	6.09	254.12	15	9	0.728	0.822117	22.45	125.1	74.9	33.52	42.82	High	High	High	High	High	High	1		3	3	Present Both	1	GLYMA_20G045500	GLYMA_20G045500	sp|Q8H0X6|CYT6_ARATH	Cysteine proteinase inhibitor 6 GN=CYS6	ident:65/97 pos:80/97 query:97 hit:234 align:97 bit:136.0	Partial_match_hit	Cysteine proteinase inhibitor 6 (AtCYS-6)	PIP-M; PRLI-interacting factor M	CYT6_ARATH	Q8H0X6	Q8VZA2; Q9FUB0; Q9LHF9	CYS6	na	Arabidopsis thaliana (Mouse-ear cress)	3702
High	Master Protein	GLYMA_13G071800	PTHR11413//PTHR11413:SF50 - CYSTATIN FAMILY MEMBER // SUBFAMILY NOT NAMED (1 of 4)	0	180.929	92	14	69	5	97	10.7	6.09	237.33	14	0	1.192	0.946873	64.13	96.6	103.4	38.33	57.69	High	High	High	High	High	High	1		3	3	Present Both	1	GLYMA_13G071800	GLYMA_13G071800	sp|Q8H0X6|CYT6_ARATH	Cysteine proteinase inhibitor 6 GN=CYS6	ident:65/97 pos:79/97 query:97 hit:234 align:97 bit:134.8	Partial_match_hit	Cysteine proteinase inhibitor 6 (AtCYS-6)	PIP-M; PRLI-interacting factor M	CYT6_ARATH	Q8H0X6	Q8VZA2; Q9FUB0; Q9LHF9	CYS6	na	Arabidopsis thaliana (Mouse-ear cress)	3702
High	Master Protein	GLYMA_14G038200	PTHR11413//PTHR11413:SF50 - CYSTATIN FAMILY MEMBER // SUBFAMILY NOT NAMED (1 of 4)	0	8.89	10	1	2	1	103	11.4	6.06	5.23	1	0	0.672	0.799527	9.46	119.6	80.4	19.8		High	High	Not Found	Peak Found	Not Found	Not Found	1		2	1	Only Control	1	GLYMA_14G038200	GLYMA_14G038200	sp|Q8H0X6|CYT6_ARATH	Cysteine proteinase inhibitor 6 GN=CYS6	ident:59/103 pos:75/103 query:103 hit:234 align:95 bit:125.2	Partial_match_hit	Cysteine proteinase inhibitor 6 (AtCYS-6)	PIP-M; PRLI-interacting factor M	CYT6_ARATH	Q8H0X6	Q8VZA2; Q9FUB0; Q9LHF9	CYS6	na	Arabidopsis thaliana (Mouse-ear cress)	3702
High	Master Protein	GLYMA_07G266000	PTHR11413:SF26 - CYSTATIN C (1 of 2)	0	15.458	26	2	5	2	114	12.7	7.99	14.5	2	0	0.441	0.485452	4.28	138.8	61.2	16.08		High	High	Peak Found	Peak Found	High	Not Found	1		3	2	Present Both	1	GLYMA_07G266000	GLYMA_07G266000	sp|Q41916|CYT5_ARATH	Cysteine proteinase inhibitor 5 GN=CYS5	ident:47/114 pos:62/114 query:114 hit:122 align:91 bit:96.7	Poor_match	Cysteine proteinase inhibitor 5 (AtCYS-5)	na	CYT5_ARATH	Q41916	Q8LBN6; Q9FGK2	CYS5	na	Arabidopsis thaliana (Mouse-ear cress)	3702
High	Master Protein	GLYMA_13G189500	PTHR11413:SF55 - CYSTEINE PROTEINASE INHIBITOR 6 (1 of 2)	0	105.099	40	7	31	5	245	27.7	7.08	118.13	7	2	1.191	0.946873	48.55	100.5	99.5	52.67	46.63	High	High	Peak Found	High	High	High	1		3	3	Present Both	1	GLYMA_13G189500	GLYMA_13G189500	sp|Q8H0X6|CYT6_ARATH	Cysteine proteinase inhibitor 6 GN=CYS6	ident:149/245 pos:180/245 query:245 hit:234 align:233 bit:304.7	OK	Cysteine proteinase inhibitor 6 (AtCYS-6)	PIP-M; PRLI-interacting factor M	CYT6_ARATH	Q8H0X6	Q8VZA2; Q9FUB0; Q9LHF9	CYS6	na	Arabidopsis thaliana (Mouse-ear cress)	3702
High	Master Protein	GLYMA_14G025600	PTHR11430 - LIPOCALIN (1 of 3)	0	28.272	9	4	10	2	330	36.8	6.25	28.55	4	2	0.838	0.897075	8.15	141	59	64.05	82.89	High	Peak Found	High	High	High	Not Found	1		3	2	Present Both	1	GLYMA_14G025600	GLYMA_14G025600	sp|Q9STS7|CHL_ARATH	Chloroplastic lipocalin GN=CHL	ident:218/330 pos:259/330 query:330 hit:353 align:324 bit:432.6	OK	Chloroplastic lipocalin (AtCHL)	na	CHL_ARATH	Q9STS7	na	CHL	na	Arabidopsis thaliana (Mouse-ear cress)	3702
High	Master Protein	GLYMA_02G289400	PTHR11430 - LIPOCALIN (1 of 3)	0	17.794	9	3	8	1	329	36.6	6.25	18.94	3	0	0.697	0.805517	30.54	117.9	82.1	7.13	43.75	High	High	High	Peak Found	Peak Found	Peak Found	1		3	3	Present Both	1	GLYMA_02G289400	GLYMA_02G289400	sp|Q9STS7|CHL_ARATH	Chloroplastic lipocalin GN=CHL	ident:220/329 pos:260/329 query:329 hit:353 align:325 bit:436.0	OK	Chloroplastic lipocalin (AtCHL)	na	CHL_ARATH	Q9STS7	na	CHL	na	Arabidopsis thaliana (Mouse-ear cress)	3702
High	Master Protein	GLYMA_08G052600	PTHR11467//PTHR11467:SF33 - HISTONE H1/H5 // SUBFAMILY NOT NAMED (1 of 7)	0	47.87	18	7	15	7	413	44.2	10.92	30.29	7	0	0.79	0.866034	25.8	113.1	86.9	53.1	9.59	High	High	High	High	High	High	1		3	3	Present Both	1	GLYMA_08G052600	GLYMA_08G052600	sp|Q43386|HMGYA_ARATH	HMG-Y-related protein A GN=HMGA	ident:41/413 pos:61/413 query:413 hit:204 align:94 bit:82.4	Partial_match_both	HMG-Y-related protein A (AtHMGA)	High mobility group A protein	HMGYA_ARATH	Q43386	P92954; Q8LGC1	HMGA	na	Arabidopsis thaliana (Mouse-ear cress)	3702
High	Master Protein	GLYMA_02G245100	PTHR11467//PTHR11467:SF49 - HISTONE H1/H5 // SUBFAMILY NOT NAMED (1 of 6)	0	163.873	64	9	46	1	176	18.8	10.42	169.81	9	0	0.486	0.515096	11.5	139.1	60.9	65.19	24.82	High	Peak Found	High	High	High	High	1	Phospho [S122]	3	3	Present Both	1	GLYMA_02G245100	GLYMA_02G245100	sp|Q43386|HMGYA_ARATH	HMG-Y-related protein A GN=HMGA	ident:94/176 pos:113/176 query:176 hit:204 align:179 bit:129.4	OK	HMG-Y-related protein A (AtHMGA)	High mobility group A protein	HMGYA_ARATH	Q43386	P92954; Q8LGC1	HMGA	na	Arabidopsis thaliana (Mouse-ear cress)	3702
High	Master Protein	GLYMA_02G245000	PTHR11467//PTHR11467:SF49 - HISTONE H1/H5 // SUBFAMILY NOT NAMED (1 of 6)	0	155.726	64	9	42	1	176	18.8	10.42	163.22	9	6	0.614	0.700985	13.56	129.4	70.6	42.29	23.97	High	High	Peak Found	High	High	Peak Found	1	Phospho [S122]	3	3	Present Both	1	GLYMA_02G245000	GLYMA_02G245000	sp|Q43386|HMGYA_ARATH	HMG-Y-related protein A GN=HMGA	ident:93/176 pos:112/176 query:176 hit:204 align:179 bit:127.9	OK	HMG-Y-related protein A (AtHMGA)	High mobility group A protein	HMGYA_ARATH	Q43386	P92954; Q8LGC1	HMGA	na	Arabidopsis thaliana (Mouse-ear cress)	3702
High	Master Protein	GLYMA_14G215200	PTHR11467//PTHR11467:SF49 - HISTONE H1/H5 // SUBFAMILY NOT NAMED (1 of 6)	0	133.551	64	11	42	2	176	18.9	10.26	120.19	11	9	0.74	0.833854	31.37	126.1	73.9	58.16	10.57	High	High	Not Found	High	High	Not Found	1	Phospho [S122]	2	2	Present Both	1	GLYMA_14G215200	GLYMA_14G215200	sp|Q43386|HMGYA_ARATH	HMG-Y-related protein A GN=HMGA	ident:80/176 pos:107/176 query:176 hit:204 align:177 bit:129.0	Poor_match	HMG-Y-related protein A (AtHMGA)	High mobility group A protein	HMGYA_ARATH	Q43386	P92954; Q8LGC1	HMGA	na	Arabidopsis thaliana (Mouse-ear cress)	3702
High	Master Protein	GLYMA_14G215100	PTHR11467//PTHR11467:SF49 - HISTONE H1/H5 // SUBFAMILY NOT NAMED (1 of 6)	0	116.513	64	10	40	1	176	18.9	10.26	105.82	10	0	0.491	0.522864	1.41	134.1	65.9	1.06	11.69	High	High	Not Found	High	Peak Found	High	1	Phospho [S122]	2	3	Present Both	1	GLYMA_14G215100	GLYMA_14G215100	sp|Q43386|HMGYA_ARATH	HMG-Y-related protein A GN=HMGA	ident:79/176 pos:107/176 query:176 hit:204 align:177 bit:127.1	Poor_match	HMG-Y-related protein A (AtHMGA)	High mobility group A protein	HMGYA_ARATH	Q43386	P92954; Q8LGC1	HMGA	na	Arabidopsis thaliana (Mouse-ear cress)	3702
High	Master Protein	GLYMA_02G244300	PTHR11527:SF142 - 15.7 KDA HEAT SHOCK PROTEIN, PEROXISOMAL (1 of 2)	0	101.834	74	10	21	6	144	16.2	7.64	68.18	10	3	1.183	0.94963	49.51	102	98	19.4	102.08	High	High	Peak Found	High	Peak Found	High	1		3	3	Present Both	1	GLYMA_02G244300	GLYMA_02G244300	sp|Q9FHQ3|HS157_ARATH	15.7 kDa heat shock protein, peroxisomal GN=HSP15.7	ident:90/144 pos:109/144 query:144 hit:137 align:143 bit:172.9	OK	15.7 kDa heat shock protein, peroxisomal (AtHsp15.7)	na	HS157_ARATH	Q9FHQ3	na	HSP15.7	na	Arabidopsis thaliana (Mouse-ear cress)	3702
High	Master Protein	GLYMA_14G214800	PTHR11527:SF142 - 15.7 KDA HEAT SHOCK PROTEIN, PEROXISOMAL (1 of 2)	0	84.299	60	9	24	5	144	16.2	7.58	72.68	9	0	1.164	0.952604	14.34	114.9	85.1	8.55	45.16	High	High	Not Found	High	Not Found	High	1		2	2	Present Both	1	GLYMA_14G214800	GLYMA_14G214800	sp|Q9FHQ3|HS157_ARATH	15.7 kDa heat shock protein, peroxisomal GN=HSP15.7	ident:92/144 pos:113/144 query:144 hit:137 align:148 bit:176.8	OK	15.7 kDa heat shock protein, peroxisomal (AtHsp15.7)	na	HS157_ARATH	Q9FHQ3	na	HSP15.7	na	Arabidopsis thaliana (Mouse-ear cress)	3702
High	Master Protein	GLYMA_07G200200	PTHR11527:SF158 - 17.6 KDA CLASS I HEAT SHOCK PROTEIN 1-RELATED (1 of 20)	0	273.499	66	17	66	5	161	18.5	6.37	268.26	17	0	2.158	0.534435	49.75	65.7	134.3	30.48	51.34	High	High	High	High	High	Not Found	1		3	2	Present Both	1	GLYMA_07G200200	GLYMA_07G200200	sp|Q9LNW0|HS178_ARATH	17.8 kDa class I heat shock protein GN=HSP17.8	ident:115/161 pos:134/161 query:161 hit:157 align:165 bit:225.7	OK	17.8 kDa class I heat shock protein	17.8 kDa heat shock protein (AtHsp17.8)	HS178_ARATH	Q9LNW0	na	HSP17.8	na	Arabidopsis thaliana (Mouse-ear cress)	3702
[truncated: 1,085 more rows]
[truncated: 18 more columns]

## Sheet: Label Free Quantification
Control/Salt-treatment (100 mM) Leaf Plasma Membrane Orthologs with fold changes
								Do not include column headers for copy/paste to STRING-DB input boxes
Actual					Arabidopsis			Arabidopsis
[truncated: 1,554 more rows]

## Sheet: Up-Regulated
Up-regulated in 100 mM salt treatment; significant candidates (FDR < 0.10)
[truncated: 83 more rows]

[truncated: 1 more sheets: Down-Regulated]
