# Supplementary material for: Membrane Proteomic Profiling of Soybean Leaf and Root Tissues Uncovers Salt-Stress-Responsive Membrane Proteins
Source: Int J Mol Sci. 2022 Oct 31;23(21):13270. doi: 10.3390/ijms232113270 (PMC9655375; doi:10.3390/ijms232113270)
Supplement: Supplementary file 1 [file ijms-23-13270-s001.zip › Table S3.xlsx]

## Sheet: ReadMe
Column	Header	Description
AG	Present_Control	Count of how many Control samples had quant data	Computed in Python script
AH	Present_Sample	Count of how many salt-treatment samples had quant data	Computed in Python script
AI	Missing_Status	Missing value status (present is 2/3 or 3/3; missing is 1/3 or 0/3)	Computed in Python script
AJ	Counter	Column of ones for row counting
AK	Index	Copy of Accession column (keys used in annotation script)
AL	query_acc	Accession of identified protein	Ortholog mapping
AM	hit_acc	Accession of Adabidopsis ortholog	Ortholog mapping
AN	hit_desc	Description of Adabidopsis ortholog	Ortholog mapping
AO	blast_scores	Summary of BLAST alignment	Ortholog mapping
AP	match_status	Summary of relative match status	Ortholog mapping
AQ	Primary Protein Name	Main protein name	UniProt annotations
AR	Alternative Protein Names	Any other protein names	UniProt annotations
AS	Identifier	Swiss-Prot identifier	UniProt annotations
AT	Accession	Swiss-Prot accession	UniProt annotations
AU	Other Accessions	Any other accessions	UniProt annotations
AV	UniProt Gene Name	UniProt gene symbols	UniProt annotations
AW	Other Gene Synonyms	Any other gene symbols	UniProt annotations
AX	Species Name	Species name	UniProt annotations
AY	Taxonomy Number	Taxonomy number	UniProt annotations
AZ	UniProt Link	Link to UniProt knowledgebase	UniProt annotations
BA	Key Words	UniProt keyword lists (a controlled vocabulary added by curation)	UniProt annotations
BB	KW: Biological process	Keywords separated into categories	UniProt annotations
BC	KW: Cellular component	Keywords separated into categories	UniProt annotations
BD	KW: Coding sequence diversity	Keywords separated into categories	UniProt annotations
BE	KW: Developmental stage	Keywords separated into categories	UniProt annotations
BF	KW: Disease	Keywords separated into categories	UniProt annotations
BG	KW: Domain	Keywords separated into categories	UniProt annotations
BH	KW: Ligand	Keywords separated into categories	UniProt annotations
BI	KW: Molecular function	Keywords separated into categories	UniProt annotations
BJ	KW: PTM	Keywords separated into categories	UniProt annotations
BK	KW: Technical term	Keywords separated into categories	UniProt annotations
BL	GO: Biological Process	GO terms	UniProt annotations
BM	GO: Cellular Component	GO terms	UniProt annotations
BN	GO: Molecular Function	GO terms	UniProt annotations
BO	CC Pathway	Manual curation pathway notes	UniProt annotations
BP	Reactome Pathway	Reactome pathway information	UniProt annotations
BQ	Trim	Blank column

## Sheet: Identified Proteins
Protein FDR Confidence: Combined	Master	Accession	Description	Exp. q-value: Combined	Sum PEP Score	Coverage [%]	# Peptides	# PSMs	# Unique Peptides	# AAs	MW [kDa]	calc. pI	Score Sequest HT: Sequest HT	# Peptides (by Search Engine): Sequest HT	# Razor Peptides	Abundance Ratio: (Sample) / (Control)	Abundance Ratio Adj. P-Value: (Sample) / (Control)	Abundance Ratio Variability [%]: (Sample) / (Control)	Abundances (Grouped): Control	Abundances (Grouped): Sample	Abundances (Grouped) CV [%]: Control	Abundances (Grouped) CV [%]: Sample	Control Root Replicate 1	Control Root Replicate 2	Control Root Replicate 3	50 mm Root Replicate 1	50 mm Root Replicate 2	50 mm Root Replicate 3	# Protein Groups	Modifications	Present_Control	Present_Sample	Missing_Status	Counter	Index	query_acc	hit_acc	hit_desc	blast_scores	match_status	Primary Protein Name	Alternative Protein Names	Identifier	Accession	Other Accessions	UniProt Gene Name	Other Gene Synonyms	Species Name	Taxonomy Number
High	Master Protein	GLYMA_01G234200		0	195.75	43	12	104	12	157	17.3	9.54	327.53	12	0	0.924	0.999223	44.06	125.4	74.6	39.5	7.41	High	High	High	High	High	High	1		3	3	Present Both	1	GLYMA_01G234200	GLYMA_01G234200	sp|Q8L840|RQL4A_ARATH	ATP-dependent DNA helicase Q-like 4A GN=RECQL4A	ident:34/157 pos:43/157 query:157 hit:1188 align:101 bit:28.1	Partial_match_hit	ATP-dependent DNA helicase Q-like 4A	RecQ-like protein 4A (AtRecQ4A; AtRecQl4A); SGS1-like protein (AtSGS1)	RQL4A_ARATH	Q8L840	O04092; Q9FT71	RECQL4A	RECQ4A; RQL4A; SGS1	Arabidopsis thaliana (Mouse-ear cress)	3702
High	Master Protein	GLYMA_17G079700		0	181.089	68	9	83	9	126	14.4	9.35	322.27	9	0	0.921	0.999223	46.03	100.2	99.8	33.77	14.94	High	High	High	High	High	High	1		3	3	Present Both	1	GLYMA_17G079700	GLYMA_17G079700	sp|Q9C7I1|ATL34_ARATH	RING-H2 finger protein ATL34 GN=ATL34	ident:19/126 pos:31/126 query:126 hit:327 align:71 bit:28.9	Partial_match_hit	RING-H2 finger protein ATL34	RING-type E3 ubiquitin transferase ATL34	ATL34_ARATH	Q9C7I1	na	ATL34	na	Arabidopsis thaliana (Mouse-ear cress)	3702
High	Master Protein	GLYMA_11G182300		0	167.327	57	5	59	2	115	12.3	9.61	284.78	5	0	0.831	0.946989	69.34	100.9	99.1	63.04	32.1	High	High	High	High	High	High	1		3	3	Present Both	1	GLYMA_11G182300	GLYMA_11G182300	sp|Q9ZUX4|UMP2_ARATH	Uncharacterized protein At2g27730, mitochondrial GN=UKL2	ident:67/115 pos:82/115 query:115 hit:113 align:119 bit:92.4	OK	Uncharacterized protein At2g27730, mitochondrial	na	UMP2_ARATH	Q9ZUX4	Q8LBD1	OrderedLocusNames=At2g27730	na	Arabidopsis thaliana (Mouse-ear cress)	3702
High	Master Protein	GLYMA_12G090500		0	158.597	61	6	50	3	115	12.2	9.61	244.57	6	3	0.731	0.870366	17.08	122.6	77.4	9.11	7.98	High	High	High	High	High	High	1		3	3	Present Both	1	GLYMA_12G090500	GLYMA_12G090500	sp|Q9ZUX4|UMP2_ARATH	Uncharacterized protein At2g27730, mitochondrial GN=UKL2	ident:63/115 pos:80/115 query:115 hit:113 align:116 bit:91.3	OK	Uncharacterized protein At2g27730, mitochondrial	na	UMP2_ARATH	Q9ZUX4	Q8LBD1	OrderedLocusNames=At2g27730	na	Arabidopsis thaliana (Mouse-ear cress)	3702
High	Master Protein	GLYMA_20G025000		0	103.591	43	9	48	4	230	25.6	9.83	149.48	9	5	0.891	0.984003	29.92	129.4	70.6	33.07	19.49	High	High	High	High	High	High	1		3	3	Present Both	1	GLYMA_20G025000	GLYMA_20G025000	sp|Q84K90|RHIP1_ARATH	RGS1-HXK1-interacting protein 1 GN=RHIP1	ident:114/230 pos:167/230 query:230 hit:263 align:203 bit:235.7	Poor_match	RGS1-HXK1-interacting protein 1	na	RHIP1_ARATH	Q84K90	O65593	RHIP1	na	Arabidopsis thaliana (Mouse-ear cress)	3702
High	Master Protein	GLYMA_09G059600		0	89.183	33	7	33	4	89	10.5	9.35	96.08	7	3	1.49	0.65591	49.71	92.1	107.9	57.37	29.63	High	High	High	High	High	High	1		3	3	Present Both	1	GLYMA_09G059600	GLYMA_09G059600	sp|Q9FXH5|PUP14_ARATH	Purine permease 14 GN=PUP14	ident:15/89 pos:21/89 query:89 hit:393 align:36 bit:28.5	Partial_match_both	Purine permease 14 (AtPUP14)	na	PUP14_ARATH	Q9FXH5	na	PUP14	na	Arabidopsis thaliana (Mouse-ear cress)	3702
High	Master Protein	GLYMA_07G009200		0	83.79	67	3	35	3	66	6.2	10.3	205.29	3	0	0.865	0.976873	34.99	76.5	123.5	29.68	41.36	High	High	High	High	High	High	1		3	3	Present Both	1	GLYMA_07G009200	GLYMA_07G009200	sp|Q9SAJ5|PP133_ARATH	Pentatricopeptide repeat-containing protein At1g79540 GN=PCMP-E65	ident:10/66 pos:16/66 query:66 hit:780 align:26 bit:25.4	Partial_match_both	Pentatricopeptide repeat-containing protein At1g79540	na	PP133_ARATH	Q9SAJ5	na	OrderedLocusNames=At1g79540	na	Arabidopsis thaliana (Mouse-ear cress)	3702
High	Master Protein	GLYMA_10G277900		0	76.955	22	5	25	3	85	9.7	9.79	93.71	5	0	0.718	0.855895	41.59	109.3	90.7	14.87	50.3	High	High	High	High	High	High	1		3	3	Present Both	1	GLYMA_10G277900	GLYMA_10G277900	sp|Q9ZUX4|UMP2_ARATH	Uncharacterized protein At2g27730, mitochondrial GN=UKL2	ident:22/85 pos:30/85 query:85 hit:113 align:38 bit:41.2	Partial_match_both	Uncharacterized protein At2g27730, mitochondrial	na	UMP2_ARATH	Q9ZUX4	Q8LBD1	OrderedLocusNames=At2g27730	na	Arabidopsis thaliana (Mouse-ear cress)	3702
High	Master Protein	GLYMA_04G230700		0	75.495	69	3	35	3	72	8.2	7.52	133.95	3	0	0.998	0.999223	91.93	102.3	97.7	41.46	9.33	High	High	High	High	High	High	1		3	3	Present Both	1	GLYMA_04G230700	GLYMA_04G230700	sp|Q9C9I8|ERF20_ARATH	Ethylene-responsive transcription factor ERF020 GN=ERF020	ident:16/72 pos:21/72 query:72 hit:143 align:40 bit:28.1	Partial_match_hit	Ethylene-responsive transcription factor ERF020	na	ERF20_ARATH	Q9C9I8	na	ERF020	na	Arabidopsis thaliana (Mouse-ear cress)	3702
High	Master Protein	GLYMA_07G225100		0	72.527	41	8	36	3	231	25.7	9.83	92.02	8	0	0.808	0.936467	51.43	110.6	89.4	62.81	6.53	High	High	Peak Found	High	High	High	1		3	3	Present Both	1	GLYMA_07G225100	GLYMA_07G225100	sp|Q84K90|RHIP1_ARATH	RGS1-HXK1-interacting protein 1 GN=RHIP1	ident:113/231 pos:163/231 query:231 hit:263 align:203 bit:229.6	Poor_match	RGS1-HXK1-interacting protein 1	na	RHIP1_ARATH	Q84K90	O65593	RHIP1	na	Arabidopsis thaliana (Mouse-ear cress)	3702
High	Master Protein	GLYMA_12G066300		0	70.317	63	6	27	2	67	7.8	10.61	76.74	6	4	0.852	0.967747	55.23	106.6	93.4	28.81	3.89	High	High	High	High	High	High	1		3	3	Present Both	1	GLYMA_12G066300	GLYMA_12G066300	sp|Q8W037|NIP21_ARATH	Aquaporin NIP2-1 GN=NIP2-1	ident:18/67 pos:28/67 query:67 hit:288 align:49 bit:30.4	Partial_match_hit	Aquaporin NIP2-1	NOD26-like intrinsic protein 2-1 (AtNIP2;1); Nodulin-26-like major intrinsic protein 4 (NodLikeMip4; Protein NLM4)	NIP21_ARATH	Q8W037	O64706; Q1ECK8	NIP2-1	NLM4	Arabidopsis thaliana (Mouse-ear cress)	3702
High	Master Protein	GLYMA_05G020300		0	70.007	72	4	35	4	54	6.1	5.11	130.43	4	0	0.808	0.936331	33.59	104.3	95.7	7.29	31.1	High	High	High	High	High	High	1		3	3	Present Both	1	GLYMA_05G020300	GLYMA_05G020300	sp|Q9SD80|TOM5_ARATH	Mitochondrial import receptor subunit TOM5 homolog GN=TOM5	ident:28/54 pos:44/54 query:54 hit:54 align:54 bit:70.1	Poor_match	Mitochondrial import receptor subunit TOM5 homolog	Translocase of outer membrane 5 kDa subunit homolog	TOM5_ARATH	Q9SD80	P83431	TOM5	na	Arabidopsis thaliana (Mouse-ear cress)	3702
High	Master Protein	GLYMA_08G130200		0	66.549	70	6	35	6	64	7.6	8.54	133.72	6	0	0.829	0.946309	17.73	115.4	84.6	28.41	7.12	High	High	High	High	High	High	1		3	3	Present Both	1	GLYMA_08G130200	GLYMA_08G130200	sp|Q9XIF4|TRXH7_ARATH	Thioredoxin H7 GN=TRX7	ident:12/64 pos:23/64 query:64 hit:129 align:37 bit:26.6	Partial_match_hit	Thioredoxin H7 (AtTrxh7)	na	TRXH7_ARATH	Q9XIF4	na	TRX7	na	Arabidopsis thaliana (Mouse-ear cress)	3702
High	Master Protein	GLYMA_15G165900		0	66.057	33	7	32	4	89	10.6	9.35	66.75	7	0	0.909	0.99265	22.57	68.2	131.8	37.28	54.96	High	High	High	High	High	High	1		3	3	Present Both	1	GLYMA_15G165900	GLYMA_15G165900	sp|Q9FXH5|PUP14_ARATH	Purine permease 14 GN=PUP14	ident:15/89 pos:21/89 query:89 hit:393 align:36 bit:28.5	Partial_match_both	Purine permease 14 (AtPUP14)	na	PUP14_ARATH	Q9FXH5	na	PUP14	na	Arabidopsis thaliana (Mouse-ear cress)	3702
High	Master Protein	GLYMA_03G080200		0	56.443	32	6	21	6	197	20.9	4.86	55.7	6	0	0.623	0.678021	30.32	126.6	73.4	9.66	31.23	High	High	High	High	High	High	1		3	3	Present Both	1	GLYMA_03G080200	GLYMA_03G080200	sp|Q8LDV3|Y4320_ARATH	Uncharacterized protein At4g13200, chloroplastic GN=CBSCBSPB1	ident:61/197 pos:74/197 query:197 hit:185 align:96 bit:125.6	Partial_match_both	Uncharacterized protein At4g13200, chloroplastic	na	Y4320_ARATH	Q8LDV3	Q9SVQ7	OrderedLocusNames=At4g13200	na	Arabidopsis thaliana (Mouse-ear cress)	3702
High	Master Protein	GLYMA_11G143200		0	54.624	76	5	17	1	55	6.5	10.45	45.11	5	0	1.108	0.946309	42.97	111.9	88.1	20.63	25.67	High	High	Peak Found	High	Peak Found	High	1		3	3	Present Both	1	GLYMA_11G143200	GLYMA_11G143200	sp|Q8W037|NIP21_ARATH	Aquaporin NIP2-1 GN=NIP2-1	ident:16/55 pos:24/55 query:55 hit:288 align:44 bit:25.4	Partial_match_hit	Aquaporin NIP2-1	NOD26-like intrinsic protein 2-1 (AtNIP2;1); Nodulin-26-like major intrinsic protein 4 (NodLikeMip4; Protein NLM4)	NIP21_ARATH	Q8W037	O64706; Q1ECK8	NIP2-1	NLM4	Arabidopsis thaliana (Mouse-ear cress)	3702
High	Master Protein	GLYMA_12G082200		0	52.531	93	4	19	4	68	7.1	10.37	48.98	4	0	1.572	0.569797	87.21	60.9	139.1	64.89	62.74	High	High	Peak Found	High	High	High	1		3	3	Present Both	1	GLYMA_12G082200	GLYMA_12G082200	sp|Q9C7A2|ITN1_ARATH	Ankyrin repeat-containing protein ITN1 GN=ITN1	ident:12/68 pos:19/68 query:68 hit:590 align:33 bit:26.2	Partial_match_both	Ankyrin repeat-containing protein ITN1	Protein INCREASED TOLERANCE TO NACL	ITN1_ARATH	Q9C7A2	Q8LED2; Q9LHH2	ITN1	na	Arabidopsis thaliana (Mouse-ear cress)	3702
High	Master Protein	GLYMA_08G146200		0	48.189	24	6	16	6	413	45.5	4.58	41.06	6	0	1.109	0.946309	76.4	139.2	60.8	68.45	67.68	High	High	Peak Found	Peak Found	High	High	1		3	3	Present Both	1	GLYMA_08G146200	GLYMA_08G146200	sp|Q94CG0|CIPKL_ARATH	CBL-interacting serine/threonine-protein kinase 21 GN=CIPK21	ident:20/413 pos:32/413 query:413 hit:416 align:54 bit:32.0	Partial_match_both	CBL-interacting serine/threonine-protein kinase 21	SNF1-related kinase 3.4; SOS2-like protein kinase PKS23	CIPKL_ARATH	Q94CG0	Q8RWJ1; Q9FKL0	CIPK21	PKS23; SnRK3.4	Arabidopsis thaliana (Mouse-ear cress)	3702
High	Master Protein	GLYMA_06G015300		0	47.873	43	7	22	7	167	19.5	9.64	62.09	7	0	0.52	0.404135	16.76	150	50	5.25	52.3	High	High	High	High	High	High	1		3	3	Present Both	1	GLYMA_06G015300	GLYMA_06G015300	sp|Q9FPG2|OP21B_ARATH	Outer envelope pore protein 21B, chloroplastic GN=OEP21B	ident:97/167 pos:131/167 query:167 hit:167 align:167 bit:226.5	OK	Outer envelope pore protein 21B, chloroplastic	Chloroplastic outer envelope pore protein of 21 kDa B	OP21B_ARATH	Q9FPG2	F4I2D6	OEP21B	na	Arabidopsis thaliana (Mouse-ear cress)	3702
High	Master Protein	GLYMA_13G259900		0	44.441	38	3	11	3	153	16.4	10.08	41.96	3	0	0.973	0.999223	60.08	107	93	49.6	14.17	High	High	High	High	High	High	1		3	3	Present Both	1	GLYMA_13G259900	GLYMA_13G259900	sp|Q8H960|TOM2B_ARATH	Tobamovirus multiplication protein 2B GN=TOM2B	ident:70/153 pos:78/153 query:153 hit:122 align:101 bit:129.4	Poor_match	Tobamovirus multiplication protein 2B (AtTOM2B)	na	TOM2B_ARATH	Q8H960	F4ICP0; Q682B7; Q8L9F1	TOM2B	TTM1	Arabidopsis thaliana (Mouse-ear cress)	3702
High	Master Protein	GLYMA_06G141900		0	43.211	37	3	33	2	52	5.8	9.7	103.07	3	0	1.243	0.877469	44.84	91.6	108.4	42.36	32.7	High	High	High	High	High	High	1		3	3	Present Both	1	GLYMA_06G141900	GLYMA_06G141900	sp|Q9SYK4|IP5PD_ARATH	Type I inositol polyphosphate 5-phosphatase 13 GN=IP5P13	ident:11/52 pos:18/52 query:52 hit:1136 align:32 bit:24.6	Partial_match_hit	Type I inositol polyphosphate 5-phosphatase 13 (At5PTase13)	na	IP5PD_ARATH	Q9SYK4	F4IAA0; Q712D7	IP5P13	na	Arabidopsis thaliana (Mouse-ear cress)	3702
High	Master Protein	GLYMA_09G154800		0	42.86	23	3	12	3	133	13.7	8.81	46.76	3	0	0.392	0.112414	8.56	139.7	60.3	44.84	77.45	High	High	High	High	Peak Found	High	1		3	3	Present Both	1	GLYMA_09G154800	GLYMA_09G154800	sp|P42735|CDI8_ARATH	Cadmium-induced protein AS8 GN=APC6	ident:33/133 pos:51/133 query:133 hit:171 align:115 bit:33.1	Poor_match	Cadmium-induced protein AS8	na	CDI8_ARATH	P42735	na	OrderedLocusNames=At4g19070	na	Arabidopsis thaliana (Mouse-ear cress)	3702
High	Master Protein	GLYMA_03G258500		0	42.718	29	2	20	2	63	6.8	8.92	74.01	2	0	0.942	0.999223	50.57	105	95	42.32	12.63	High	High	Peak Found	High	High	High	1		3	3	Present Both	1	GLYMA_03G258500	GLYMA_03G258500	sp|F4JD14|BCHC1_ARATH	BEACH domain-containing protein C1 GN=BCHC1	ident:11/63 pos:13/63 query:63 hit:1941 align:26 bit:25.4	Partial_match_both	BEACH domain-containing protein C1	BEACH-domain homolog C1	BCHC1_ARATH	F4JD14	Q9LEX9	BCHC1	na	Arabidopsis thaliana (Mouse-ear cress)	3702
High	Master Protein	GLYMA_20G110900		0	41.098	22	5	15	3	88	10	9.7	39	5	1	0.941	0.999223	45.11	123.8	76.2	10	50.3	High	High	High	High	High	High	1		3	3	Present Both	1	GLYMA_20G110900	GLYMA_20G110900	sp|Q9ZUX4|UMP2_ARATH	Uncharacterized protein At2g27730, mitochondrial GN=UKL2	ident:19/88 pos:27/88 query:88 hit:113 align:32 bit:38.9	Partial_match_both	Uncharacterized protein At2g27730, mitochondrial	na	UMP2_ARATH	Q9ZUX4	Q8LBD1	OrderedLocusNames=At2g27730	na	Arabidopsis thaliana (Mouse-ear cress)	3702
High	Master Protein	GLYMA_20G188900		0	41.085	35	3	7	3	142	15.6	9.09	25.83	3	0	0.553	0.486931	21.95	106.4	93.6	21.22	7.43	High	High	Not Found	High	High	High	1		2	3	Present Both	1	GLYMA_20G188900	GLYMA_20G188900	sp|O22834|LRK53_ARATH	Probable L-type lectin-domain containing receptor kinase V.3 GN=LECRK53	ident:10/142 pos:15/142 query:142 hit:664 align:23 bit:29.6	Partial_match_both	Probable L-type lectin-domain containing receptor kinase V.3 (Arabidopsis thaliana lectin-receptor kinase c2; AthlecRK-c2; LecRK-V.3)	na	LRK53_ARATH	O22834	na	LECRK53	LECRKC2	Arabidopsis thaliana (Mouse-ear cress)	3702
High	Master Protein	GLYMA_13G308300.3.p		0	40.003	41	2	7	2	91	10.4	6.54	40	2	0	1.781	0.391826	85.17	48.3	151.7	73.42	33	High	Not Found	Peak Found	High	Peak Found	High	1		2	3	Present Both	1	GLYMA_13G308300.3.p	GLYMA_13G308300.3.p	sp|Q38821|2ABA_ARATH	Serine/threonine protein phosphatase 2A 55 kDa regulatory subunit B alpha isoform GN=PP2AB1	ident:11/91 pos:17/91 query:91 hit:513 align:43 bit:29.6	Partial_match_both	Serine/threonine protein phosphatase 2A 55 kDa regulatory subunit B alpha isoform (AtB alpha; PP2A, subunit B, alpha isoform)	na	2ABA_ARATH	Q38821	Q0WL96; Q27GN0; Q8L842; Q9C8H8	PP2AB1	na	Arabidopsis thaliana (Mouse-ear cress)	3702
High	Master Protein	GLYMA_04G223400		0	35.51	37	3	31	2	52	5.8	9.7	83.78	3	1	1.255	0.870366	60.6	89.3	110.7	55.16	24.77	High	High	High	High	High	High	1		3	3	Present Both	1	GLYMA_04G223400	GLYMA_04G223400	sp|P54144|AMT11_ARATH	Ammonium transporter 1 member 1 GN=AMT1-1	ident:11/52 pos:14/52 query:52 hit:501 align:25 bit:25.8	Partial_match_both	Ammonium transporter 1 member 1 (AtAMT1;1)	na	AMT11_ARATH	P54144	Q94C23	AMT1-1	na	Arabidopsis thaliana (Mouse-ear cress)	3702
High	Master Protein	GLYMA_05G188000		0	34.954	20	5	14	5	432	47.9	4.64	42.33	5	0	0.642	0.728498	41.18	131.1	68.9	79.88	88.24	High	High	Peak Found	High	High	Peak Found	1		3	3	Present Both	1	GLYMA_05G188000	GLYMA_05G188000	sp|F4J6F6|IREH1_ARATH	Probable serine/threonine protein kinase IREH1 GN=IREH1	ident:29/432 pos:50/432 query:432 hit:1296 align:107 bit:32.3	Partial_match_both	Probable serine/threonine protein kinase IREH1	Protein IRE homolog 1 (AtIREH1)	IREH1_ARATH	F4J6F6	Q8GZ40; Q9LVI5; Q9MB45	IREH1	na	Arabidopsis thaliana (Mouse-ear cress)	3702
High	Master Protein	GLYMA_01G010600		0	28.246	55	6	13	6	138	15.9	9.55	19.05	6	0	0.488	0.327002	8.67	129.3	70.7	28.17	23.82	High	High	High	High	High	High	1		3	3	Present Both	1	GLYMA_01G010600	GLYMA_01G010600	sp|Q9SSE8|GLYT1_ARATH	Probable glycosyltransferase At3g07620 GN=GLU2	ident:10/138 pos:25/138 query:138 hit:470 align:47 bit:28.9	Partial_match_both	Probable glycosyltransferase At3g07620	na	GLYT1_ARATH	Q9SSE8	na	OrderedLocusNames=At3g07620	na	Arabidopsis thaliana (Mouse-ear cress)	3702
High	Master Protein	GLYMA_02G194800		0	27.161	21	4	12	3	243	26.7	8.44	29.4	4	1	0.774	0.915744	34.39	101.2	98.8	17.61	25.05	High	High	High	High	High	High	1		3	3	Present Both	1	GLYMA_02G194800	GLYMA_02G194800	sp|Q84TI3|OBE4_ARATH	Protein OBERON 4 GN=OBE4	ident:19/243 pos:27/243 query:243 hit:1162 align:57 bit:28.1	Partial_match_both	Protein OBERON 4	na	OBE4_ARATH	Q84TI3	Q9LY65	OBE4	na	Arabidopsis thaliana (Mouse-ear cress)	3702
High	Master Protein	GLYMA_15G147300		0	24.669	25	5	22	5	198	22.3	5.73	44.55	5	0	0.787	0.919239	26.26	130.6	69.4	39.37	50.15	High	High	High	High	High	High	1		3	3	Present Both	1	GLYMA_15G147300	GLYMA_15G147300	sp|Q4PT37|NEAP3_ARATH	Nuclear envelope-associated protein 3 GN=NEAP3	ident:31/198 pos:48/198 query:198 hit:336 align:86 bit:35.4	Partial_match_both	Nuclear envelope-associated protein 3 (AtNEAP3)	na	NEAP3_ARATH	Q4PT37	O80530	NEAP3	na	Arabidopsis thaliana (Mouse-ear cress)	3702
High	Master Protein	GLYMA_06G124600		0	24.622	23	3	12	3	189	20.8	6.8	32.61	3	0	0.697	0.834549	23.07	112	88	13.99	35.84	High	High	High	High	High	High	1		3	3	Present Both	1	GLYMA_06G124600	GLYMA_06G124600	sp|Q9FXK3|FBK11_ARATH	F-box/kelch-repeat protein At1g24881 GN=FBL25	ident:13/189 pos:14/189 query:189 hit:433 align:27 bit:27.7	Partial_match_both	F-box/kelch-repeat protein At1g24881	na	FBK11_ARATH	P0DI03	Q0WR04; Q56X62; Q56XG9; Q7GAV1; Q8GRJ5; Q8RXU7; Q9FE36; Q9FXK3; Q9FXK7	OrderedLocusNames=At1g24881	na	Arabidopsis thaliana (Mouse-ear cress)	3702
High	Master Protein	GLYMA_13G132200		0	24.062	19	1	4	1	94	10.7	9.29	13.88	1	0	0.582	0.562408	0	126.4	73.6			High	Not Found	Peak Found	High	Not Found	High	1		2	2	Present Both	1	GLYMA_13G132200	GLYMA_13G132200	sp|Q9ZQ96|U73C3_ARATH	UDP-glycosyltransferase 73C3 GN=UGT73C3	ident:30/94 pos:41/94 query:94 hit:496 align:96 bit:28.5	Partial_match_hit	UDP-glycosyltransferase 73C3	na	U73C3_ARATH	Q9ZQ96	na	UGT73C3	na	Arabidopsis thaliana (Mouse-ear cress)	3702
High	Master Protein	GLYMA_04G055900		0	20.828	6	1	9	1	227	24.2	6.87	29.29	1	0	1.124	0.940144	63.91	79.7	120.3	33.62	45.47	High	High	Peak Found	High	High	High	1		3	3	Present Both	1	GLYMA_04G055900	GLYMA_04G055900	sp|Q949P2|COPDA_ARATH	Probable cytosolic oligopeptidase A GN=CYOP	ident:18/227 pos:23/227 query:227 hit:701 align:51 bit:29.6	Partial_match_both	Probable cytosolic oligopeptidase A	Thimet metalloendopeptidase 2; Zincin-like metalloproteases family protein 2	COPDA_ARATH	Q949P2	Q9LXA6	CYOP	TOP2	Arabidopsis thaliana (Mouse-ear cress)	3702
High	Master Protein	GLYMA_08G344200		0	20.692	24	3	6	3	165	16.8	4.77	13.32	3	0	0.824	0.943109	64.99	128	72	68.84	28.17	High	High	Peak Found	High	Peak Found	High	1		3	3	Present Both	1	GLYMA_08G344200	GLYMA_08G344200	sp|Q9LV66|Y5848_ARATH	Uncharacterized protein At5g48480 GN=CBSDUF5	ident:74/165 pos:95/165 query:165 hit:166 align:156 bit:119.4	Poor_match	Uncharacterized protein At5g48480	na	Y5848_ARATH	Q9LV66	na	OrderedLocusNames=At5g48480	na	Arabidopsis thaliana (Mouse-ear cress)	3702
High	Master Protein	GLYMA_13G350800		0	20.277	9	3	12	3	329	37.3	8.97	14.02	3	0	0.93	0.999223	30.49	100.2	99.8	33.91	21.04	High	High	High	High	High	High	1		3	3	Present Both	1	GLYMA_13G350800	GLYMA_13G350800	sp|Q9C717|FLXL3_ARATH	Protein FLX-like 3 GN=FLXL3	ident:147/329 pos:198/329 query:329 hit:283 align:289 bit:251.1	Poor_match	Protein FLX-like 3 (AtFLXL3)	na	FLXL3_ARATH	Q9C717	Q9C887	FLXL3	FLL3	Arabidopsis thaliana (Mouse-ear cress)	3702
High	Master Protein	GLYMA_18G297600		0	19.789	47	2	9	2	68	7.2	8.47	23.56	2	0	0.511	0.377654	8.47	129.7	70.3	12.24	12.05	High	High	Peak Found	High	High	High	1		3	3	Present Both	1	GLYMA_18G297600	GLYMA_18G297600	sp|Q94AC1|STR6_ARATH	Rhodanese-like domain-containing protein 6 GN=STR6	ident:13/68 pos:14/68 query:68 hit:581 align:24 bit:27.3	Partial_match_both	Rhodanese-like domain-containing protein 6	Sulfurtransferase 6 (AtStr6)	STR6_ARATH	Q94AC1	O80479	STR6	na	Arabidopsis thaliana (Mouse-ear cress)	3702
High	Master Protein	GLYMA_06G134300		0	17.467	3	2	4	2	867	96	5.83	14.2	2	0	0.562	0.512082	9.91	156.4	43.6	24.67	24.12	High	High	Peak Found	High	Peak Found	Peak Found	1	Acetyl [N-Term]	3	3	Present Both	1	GLYMA_06G134300	GLYMA_06G134300	sp|Q8S2T0|GRIP_ARATH	Protein GRIP GN=GRIP	ident:32/867 pos:49/867 query:867 hit:788 align:99 bit:30.8	Partial_match_both	Protein GRIP (AtGRIP)	na	GRIP_ARATH	Q8S2T0	Q3E854; Q944S6; Q9FKX9	GRIP	na	Arabidopsis thaliana (Mouse-ear cress)	3702
High	Master Protein	GLYMA_16G182200		0	16.705	5	5	7	5	975	106.7	4.79	7.8	5	0	0.846	0.961903	58.59	190.7	9.3	83.37	155.08	High	High	Peak Found	Peak Found	High	Peak Found	1		3	3	Present Both	1	GLYMA_16G182200	GLYMA_16G182200	sp|Q9FLH0|CRWN4_ARATH	Protein CROWDED NUCLEI 4 GN=CRWN4	ident:34/975 pos:55/975 query:975 hit:1010 align:98 bit:38.5	Partial_match_both	Protein CROWDED NUCLEI 4	Protein LITTLE NUCLEI 4	CRWN4_ARATH	Q9FLH0	F4JXK1; O49539	CRWN4	na	Arabidopsis thaliana (Mouse-ear cress)	3702
High	Master Protein	GLYMA_13G318100		0	15.682	17	2	7	2	159	17.9	5.27	24.08	2	0	0.679	0.809359	10.74	126.8	73.2	18.93	24.23	High	High	Peak Found	High	High	High	1		3	3	Present Both	1	GLYMA_13G318100	GLYMA_13G318100	sp|Q39168|U540A_ARATH	UPF0540 protein At1g62000 GN=UTR2	ident:16/159 pos:24/159 query:159 hit:148 align:46 bit:28.9	Partial_match_both	UPF0540 protein At1g62000	na	U540A_ARATH	Q39168	na	OrderedLocusNames=At1g62000	na	Arabidopsis thaliana (Mouse-ear cress)	3702
High	Master Protein	GLYMA_18G203200		0	14.612	31	1	3	1	70	7.8	9.38	12.95	1	0	100	9.48889e-17			200		11.1	High	Not Found	Not Found	High	Not Found	High	1		1	2	Only Sample	1	GLYMA_18G203200	GLYMA_18G203200	sp|Q5W9E7|MUS81_ARATH	Crossover junction endonuclease MUS81 GN=MUS81	ident:10/70 pos:16/70 query:70 hit:659 align:19 bit:25.4	Partial_match_both	Crossover junction endonuclease MUS81	Protein MMS AND UV SENSITIVE 81 (AtMUS81)	MUS81_ARATH	Q5W9E7	A1Z073; O65562	MUS81	na	Arabidopsis thaliana (Mouse-ear cress)	3702
High	Master Protein	GLYMA_05G058000.2.p		0	12.052	19	2	10	2	125	13.5	7.97	22.04	2	0	0.771	0.909812	22.19	118.4	81.6	44.16	21.6	High	High	High	High	High	High	1		3	3	Present Both	1	GLYMA_05G058000.2.p	GLYMA_05G058000.2.p	sp|Q9FGK0|NDUB8_ARATH	NADH dehydrogenase [ubiquinone] 1 beta subcomplex subunit 8, mitochondrial GN=NDC80	ident:105/125 pos:113/125 query:125 hit:125 align:125 bit:198.4	OK	NADH dehydrogenase [ubiquinone] 1 beta subcomplex subunit 8, mitochondrial	na	NDUB8_ARATH	Q9FGK0	na	OrderedLocusNames=At5g47570	na	Arabidopsis thaliana (Mouse-ear cress)	3702
High	Master Protein	GLYMA_17G175000		0	11.944	1	2	4	2	2361	256.7	6.2	7.06	2	0	1.281	0.851226	74.14	76.8	123.2	30.24	18.87	High	High	Peak Found	High	High	Peak Found	1		3	3	Present Both	1	GLYMA_17G175000	GLYMA_17G175000	sp|F4JH53|FDM2_ARATH	Factor of DNA methylation 2 GN=FDM2	ident:32/2361 pos:65/2361 query:2361 hit:635 align:120 bit:47.0	Partial_match_both	Factor of DNA methylation 2	Protein IDN2 PARALOG 2; Protein IDN2-LIKE 2	FDM2_ARATH	F4JH53	O23064	FDM2	na	Arabidopsis thaliana (Mouse-ear cress)	3702
High	Master Protein	GLYMA_16G160100		0	11.616	23	3	6	3	192	21.8	9.14	8.44	3	0	0.952	0.999223	18.56	101.5	98.5	24.29	9.37	High	High	Peak Found	Peak Found	High	High	1		3	3	Present Both	1	GLYMA_16G160100	GLYMA_16G160100	sp|Q9LFB8|PTR5_ARATH	Protein NRT1/ PTR FAMILY 8.2 GN=NPF8.2	ident:18/192 pos:28/192 query:192 hit:570 align:48 bit:29.6	Partial_match_both	Protein NRT1/ PTR FAMILY 8.2 (AtNPF8.2)	Peptide transporter PTR5	PTR5_ARATH	Q9LFB8	Q0WR84; Q84TJ5	NPF8.2	PTR5	Arabidopsis thaliana (Mouse-ear cress)	3702
High	Master Protein	GLYMA_07G147100		0	11.561	12	1	7	1	142	15.3	6.8	25.68	1	0	0.912	0.994649	16.62	104.5	95.5	5.28	18.83	High	High	High	High	Peak Found	High	1		3	3	Present Both	1	GLYMA_07G147100	GLYMA_07G147100	sp|Q07356|PDS_ARATH	15-cis-phytoene desaturase, chloroplastic/chromoplastic GN=PDS	ident:26/142 pos:42/142 query:142 hit:566 align:97 bit:30.8	Partial_match_hit	15-cis-phytoene desaturase, chloroplastic/chromoplastic	Phytoene dehydrogenase; Phytoene desaturase	PDS_ARATH	Q07356	F4JUN0	PDS	na	Arabidopsis thaliana (Mouse-ear cress)	3702
High	Master Protein	GLYMA_16G026500		0	10.83	37	2	8	2	51	5.7	8.62	18.8	2	0	1.243	0.877753	31.56	89.2	110.8	6.29	22.71	High	High	Peak Found	High	High	High	1		3	3	Present Both	1	GLYMA_16G026500	GLYMA_16G026500	sp|Q9SKE0|SDH8_ARATH	Succinate dehydrogenase subunit 8, mitochondrial GN=SDH8	ident:18/51 pos:21/51 query:51 hit:46 align:30 bit:41.2	Poor_match	Succinate dehydrogenase subunit 8, mitochondrial	na	SDH8_ARATH	Q9SKE0	na	SDH8	na	Arabidopsis thaliana (Mouse-ear cress)	3702
High	Master Protein	GLYMA_04G014200		0	9.716	27	2	11	2	100	11.2	9.7	12.93	2	0	0.954	0.999223	80.65	93.7	106.3	11.05	22.74	High	High	Peak Found	High	High	Peak Found	1		3	3	Present Both	1	GLYMA_04G014200	GLYMA_04G014200	sp|O80834|AHL9_ARATH	AT-hook motif nuclear-localized protein 9 GN=AHL9	ident:22/100 pos:41/100 query:100 hit:348 align:86 bit:29.3	Partial_match_hit	AT-hook motif nuclear-localized protein 9	na	AHL9_ARATH	O80834	na	AHL9	na	Arabidopsis thaliana (Mouse-ear cress)	3702
High	Master Protein	GLYMA_06G134500		0	7.133	19	1	2	1	72	8	8.78	7.03	1	0	0.624	0.682452	7	123.1	76.9	16.68	19.12	High	Peak Found	Not Found	Peak Found	High	Peak Found	1		2	3	Present Both	1	GLYMA_06G134500	GLYMA_06G134500	sp|Q5CCK4|VAL2_ARATH	B3 domain-containing transcription repressor VAL2 GN=VAL2	ident:18/72 pos:31/72 query:72 hit:780 align:64 bit:25.4	Partial_match_hit	B3 domain-containing transcription repressor VAL2	Protein HIGH-LEVEL EXPRESSION OF SUGAR-INDUCIBLE-LIKE 1; Protein VP1/ABI3-LIKE 2	VAL2_ARATH	Q5CCK4	O49390; Q0WSC1	VAL2	HSL1	Arabidopsis thaliana (Mouse-ear cress)	3702
High	Master Protein	GLYMA_15G085000		0	7.089	12	2	3	2	161	17.8	6.46	2.35	2	0	0.788	0.919239	15.98	125.2	74.8	31.02	18.98	High	High	Peak Found	High	Peak Found	Peak Found	1		3	3	Present Both	1	GLYMA_15G085000	GLYMA_15G085000	sp|Q3E954|BOR6_ARATH	Probable boron transporter 6 GN=BOR6	ident:25/161 pos:34/161 query:161 hit:671 align:67 bit:31.2	Partial_match_both	Probable boron transporter 6	na	BOR6_ARATH	Q3E954	D5LUP5	BOR6	na	Arabidopsis thaliana (Mouse-ear cress)	3702
High	Master Protein	GLYMA_11G146700		0	6.548	11	1	6	1	103	11.7	9.77	10.51	1	0	0.835	0.950048	11.8	109	91		16.03	High	High	Peak Found	High	High	High	1		3	3	Present Both	1	GLYMA_11G146700	GLYMA_11G146700	sp|F4IPK2|TAF14_ARATH	Transcription initiation factor TFIID subunit 14 GN=TAF14	ident:22/103 pos:40/103 query:103 hit:268 align:89 bit:26.2	Partial_match_hit	Transcription initiation factor TFIID subunit 14	Protein AF-9 homolog b; TBP-associated factor 14 (AtTAF14)	TAF14_ARATH	F4IPK2	Q9SL46	TAF14	na	Arabidopsis thaliana (Mouse-ear cress)	3702
High	Master Protein	GLYMA_08G114200		0	6.266	2	1	4	1	575	66.5	8.19	6.15	1	0	0.428	0.18372	4	143.5	56.5	11.53	78.21	High	High	Peak Found	High	High	Peak Found	1		3	3	Present Both	1	GLYMA_08G114200	GLYMA_08G114200	sp|Q8S9K3|VAR3_ARATH	Zinc finger protein VAR3, chloroplastic GN=VAR3	ident:20/575 pos:28/575 query:575 hit:758 align:60 bit:34.3	Partial_match_both	Zinc finger protein VAR3, chloroplastic	Organelle Zinc finger 1; Protein VARIEGATED 3	VAR3_ARATH	Q8S9K3	Q64M74; Q9FN73	VAR3	na	Arabidopsis thaliana (Mouse-ear cress)	3702
High	Master Protein	GLYMA_17G143000		0	5.896	13	1	8	1	94	10.8	10.15	25.02	1	0	0.782	0.919239	7.77	108.2	91.8	9.97	12.22	High	High	High	High	High	High	1		3	3	Present Both	1	GLYMA_17G143000	GLYMA_17G143000	sp|Q4PT23|WTR6_ARATH	WAT1-related protein At1g25270 GN=WRKY68	ident:17/94 pos:27/94 query:94 hit:355 align:46 bit:26.2	Partial_match_both	WAT1-related protein At1g25270	na	WTR6_ARATH	Q4PT23	Q9FRH6	OrderedLocusNames=At1g25270	na	Arabidopsis thaliana (Mouse-ear cress)	3702
High	Master Protein	GLYMA_08G221000.6.p		0	5.392	5	2	4	2	485	51.8	9.67	8.17	2	0	1.259	0.870366	17.44	85.7	114.3	85.26	10.81	High	High	Peak Found	Peak Found	High	Peak Found	1		3	3	Present Both	1	GLYMA_08G221000.6.p	GLYMA_08G221000.6.p	sp|Q9FZ45|Y1686_ARATH	Uncharacterized membrane protein At1g16860 GN=VHA-c3	ident:345/485 pos:398/485 query:485 hit:474 align:486 bit:692.2	OK	Uncharacterized membrane protein At1g16860	na	Y1686_ARATH	Q9FZ45	na	OrderedLocusNames=At1g16860	na	Arabidopsis thaliana (Mouse-ear cress)	3702
High	Master Protein	GLYMA_15G234500		0	4.999	5	1	5	1	364	41.3	7.97	13.21	1	0	0.74	0.878176	8.25	115	85	6.15	14.67	High	High	Not Found	High	High	High	1		2	3	Present Both	1	GLYMA_15G234500	GLYMA_15G234500	sp|Q9FY51|HPAT3_ARATH	Hydroxyproline O-arabinosyltransferase 3 GN=HPAT3	ident:269/364 pos:310/364 query:364 hit:358 align:359 bit:575.9	OK	Hydroxyproline O-arabinosyltransferase 3	na	HPAT3_ARATH	Q9FY51	na	HPAT3	na	Arabidopsis thaliana (Mouse-ear cress)	3702
High	Master Protein	GLYMA_05G107700		0	4.919	20	1	3	1	61	6.6	9.32	6.44	1	0	0.849	0.964426	19.2	107.5	92.5	24.69	14.32	High	High	Not Found	Peak Found	High	Peak Found	1		2	3	Present Both	1	GLYMA_05G107700	GLYMA_05G107700	sp|F4IME2|MSL8_ARATH	Mechanosensitive ion channel protein 8 GN=MSL8	ident:17/61 pos:26/61 query:61 hit:908 align:57 bit:32.7	Partial_match_hit	Mechanosensitive ion channel protein 8	Mechanosensitive channel of small conductance-like 8; MscS-Like protein 8	MSL8_ARATH	F4IME2	na	MSL8	na	Arabidopsis thaliana (Mouse-ear cress)	3702
High	Master Protein	GLYMA_01G230300		0	4.911	5	1	2	1	259	29.5	7.62	0	1	0	1.502	0.642895	27	79.9	120.1	13.54	27.8	High	High	Not Found	Peak Found	Peak Found	Not Found	1		2	2	Present Both	1	GLYMA_01G230300	GLYMA_01G230300	sp|Q9LKU2|TATA_ARATH	Sec-independent protein translocase protein TATA, chloroplastic GN=TATA	ident:19/259 pos:25/259 query:259 hit:147 align:58 bit:30.8	Partial_match_both	Sec-independent protein translocase protein TATA, chloroplastic	Protein THYLAKOID ASSEMBLY 4; Protein TWIN-ARGININE TRANSLOCATION A	TATA_ARATH	Q9LKU2	na	TATA	THA4	Arabidopsis thaliana (Mouse-ear cress)	3702
High	Master Protein	GLYMA_02G277800		0	3.677	8	1	6	1	113	13.1	5.17	5.23	1	0	0.933	0.999223	17.59	100.7	99.3	18.08	10.61	High	High	Not Found	High	High	High	1		2	3	Present Both	1	GLYMA_02G277800	GLYMA_02G277800	sp|Q38826|IAA8_ARATH	Auxin-responsive protein IAA8 GN=IAA8	ident:12/113 pos:21/113 query:113 hit:321 align:38 bit:28.9	Partial_match_both	Auxin-responsive protein IAA8	Indoleacetic acid-induced protein 8	IAA8_ARATH	Q38826	na	IAA8	na	Arabidopsis thaliana (Mouse-ear cress)	3702
High	Master Protein	GLYMA_U015000		0	3.628	17	2	2	2	114	13	9.61	1.81	2	0	100	9.48889e-17			200			High	Not Found	Not Found	High	Not Found	Not Found	1		1	1	Missing Both	1	GLYMA_U015000	GLYMA_U015000	sp|Q84K90|RHIP1_ARATH	RGS1-HXK1-interacting protein 1 GN=RHIP1	ident:26/114 pos:53/114 query:114 hit:263 align:91 bit:45.8	Partial_match_hit	RGS1-HXK1-interacting protein 1	na	RHIP1_ARATH	Q84K90	O65593	RHIP1	na	Arabidopsis thaliana (Mouse-ear cress)	3702
High	Master Protein	GLYMA_05G129800.3.p		0	3.288	11	1	3	1	95	10.6	8.79	6.5	1	0	1.046	0.976873	20.7	100.6	99.4	13.21	19.42	High	Peak Found	Not Found	High	Peak Found	High	1		2	3	Present Both	1	GLYMA_05G129800.3.p	GLYMA_05G129800.3.p	sp|Q8S9J0|TAUE4_ARATH	Sulfite exporter TauE/SafE family protein 4 GN=RSH2	ident:15/95 pos:22/95 query:95 hit:459 align:41 bit:27.3	Partial_match_both	Sulfite exporter TauE/SafE family protein 4	na	TAUE4_ARATH	Q8S9J0	Q9ZQB0	OrderedLocusNames=At2g36630	na	Arabidopsis thaliana (Mouse-ear cress)	3702
High	Master Protein	GLYMA_19G093900		0	3.279	16	1	1	1	76	8.5	9.47	1.72	1	0	1.269	0.867298	19.64	88.2	111.8	18.58		High	Not Found	Peak Found	Peak Found	Not Found	Not Found	1		2	1	Only Control	1	GLYMA_19G093900	GLYMA_19G093900	sp|Q9LZA6|SDP1_ARATH	Triacylglycerol lipase SDP1 GN=SDP1	ident:25/76 pos:39/76 query:76 hit:825 align:72 bit:27.7	Partial_match_hit	Triacylglycerol lipase SDP1	Protein SUGAR-DEPENDENT 1	SDP1_ARATH	Q9LZA6	Q56WV8	SDP1	na	Arabidopsis thaliana (Mouse-ear cress)	3702
Medium	Master Protein	GLYMA_11G031000		0.01	1.835	7	1	1	1	300	35.2	9.58	0	1	0	0.893	0.98584	16.73	105.7	94.3	16.03	22.17	High	Peak Found	Not Found	Peak Found	Not Found	Peak Found	1		2	2	Present Both	1	GLYMA_11G031000	GLYMA_11G031000	sp|Q2V3H0|PP322_ARATH	Pentatricopeptide repeat-containing protein At4g18975, chloroplastic GN=PCMP-E101	ident:67/300 pos:99/300 query:300 hit:287 align:164 bit:131.7	Poor_match	Pentatricopeptide repeat-containing protein At4g18975, chloroplastic	na	PP322_ARATH	Q2V3H0	O49410; Q6NKP6	OrderedLocusNames=At4g18975	na	Arabidopsis thaliana (Mouse-ear cress)	3702
Medium	Master Protein	GLYMA_10G117300		0.011	1.808	7	1	2	1	96	10.4	10.07	3.46	1	0	0.571	0.533891	3.12	126.6	73.4	8.3	10.6	High	High	Not Found	Peak Found	Peak Found	Peak Found	1		2	3	Present Both	1	GLYMA_10G117300	GLYMA_10G117300	sp|Q9S7G7|MB3R1_ARATH	Transcription factor MYB3R-1 GN=MYB3R1	ident:14/96 pos:22/96 query:96 hit:776 align:47 bit:27.7	Partial_match_both	Transcription factor MYB3R-1	Myb-related protein 3R-1; Plant c-MYB-like protein 1 (Protein PC-MYB1)	MB3R1_ARATH	Q9S7G7	O65528; Q9LDX5	MYB3R1	na	Arabidopsis thaliana (Mouse-ear cress)	3702
Medium	Master Protein	GLYMA_06G243100		0.012	1.651	9	1	4	1	89	10.4	8.18	7.13	1	0	1.081	0.964694	79.09	132.2	67.8	54.97	53.01	High	High	Peak Found	Peak Found	High	High	1		3	3	Present Both	1	GLYMA_06G243100	GLYMA_06G243100	sp|Q8RWD9|ACBP5_ARATH	Acyl-CoA-binding domain-containing protein 5 GN=ACBP5	ident:17/89 pos:32/89 query:89 hit:648 align:58 bit:29.6	Partial_match_hit	Acyl-CoA-binding domain-containing protein 5 (Acyl-CoA binding protein 5)	na	ACBP5_ARATH	Q8RWD9	na	ACBP5	na	Arabidopsis thaliana (Mouse-ear cress)	3702
Medium	Master Protein	GLYMA_05G032500		0.015	1.592	12	1	1	1	57	6.1	7.24	0	1	0	0.741	0.880381	48.2	146.5	53.5	60.87	61.81	High	Peak Found	Peak Found	Peak Found	Peak Found	Peak Found	1		3	3	Present Both	1	GLYMA_05G032500	GLYMA_05G032500	sp|Q84L09|GONS2_ARATH	GDP-mannose transporter GONST2 GN=GONST2	ident:14/57 pos:23/57 query:57 hit:375 align:45 bit:27.7	Partial_match_hit	GDP-mannose transporter GONST2	Protein GOLGI NUCLEOTIDE SUGAR TRANSPORTER 2	GONS2_ARATH	Q84L09	Q9LNU8	GONST2	na	Arabidopsis thaliana (Mouse-ear cress)	3702
High	Master Protein	GLYMA_10G058100	1.1.1.41 - Isocitrate dehydrogenase (NAD(+)) / Nicotinamide adenine dinucleotide isocitrate dehydrogenase (1 of 6)	0	78.412	28	7	24	2	359	39.4	7.49	72.67	7	4	1.263	0.870366	69.89	92.9	107.1	34.27	2.2	High	High	High	High	High	High	1		3	3	Present Both	1	GLYMA_10G058100	GLYMA_10G058100	sp|Q945K7|IDH5_ARATH	Isocitrate dehydrogenase [NAD] catalytic subunit 5, mitochondrial GN=IDH5	ident:318/359 pos:335/359 query:359 hit:374 align:373 bit:646.4	OK	Isocitrate dehydrogenase [NAD] catalytic subunit 5, mitochondrial	IDH-V; Isocitric dehydrogenase 5; NAD(+)-specific ICDH 5	IDH5_ARATH	Q945K7	Q9LZG1	IDH5	na	Arabidopsis thaliana (Mouse-ear cress)	3702
High	Master Protein	GLYMA_10G261400	1.1.1.95 - Phosphoglycerate dehydrogenase / Phosphoglyceric acid dehydrogenase (1 of 5)	0	125.935	35	12	29	5	594	62.6	6.76	89.72	12	5	1.412	0.747331	57.32	67.7	132.3	35.47	38.99	High	High	High	High	High	High	1		3	3	Present Both	1	GLYMA_10G261400	GLYMA_10G261400	sp|O49485|SERA1_ARATH	D-3-phosphoglycerate dehydrogenase 1, chloroplastic GN=PGDH1	ident:483/594 pos:539/594 query:594 hit:603 align:584 bit:972.6	OK	D-3-phosphoglycerate dehydrogenase 1, chloroplastic	Protein EMBRYO SAC DEVELOPMENT ARREST 9	SERA1_ARATH	O49485	Q8LGJ6	PGDH1	EDA9	Arabidopsis thaliana (Mouse-ear cress)	3702
High	Master Protein	GLYMA_06G188900	1.1.5.2 - Quinoprotein glucose dehydrogenase (PQQ, quinone) / Quinoprotein D-glucose dehydrogenase (1 of 2)	0	16.668	5	3	6	3	694	75	5.17	17.1	3	0	1.498	0.646431	126.36	165.1	34.9	58.88	145.6	High	High	Peak Found	Peak Found	High	Peak Found	1		3	3	Present Both	1	GLYMA_06G188900	GLYMA_06G188900	sp|Q9SSG3|HIPL1_ARATH	HIPL1 protein GN=HIPL1	ident:457/694 pos:526/694 query:694 hit:695 align:638 bit:954.9	OK	HIPL1 protein	na	HIPL1_ARATH	Q9SSG3	na	HIPL1	na	Arabidopsis thaliana (Mouse-ear cress)	3702
High	Master Protein	GLYMA_02G165500	1.1.5.3 - Glycerol-3-phosphate dehydrogenase / sn-glycerol-3-phosphate dehydrogenase (1 of 3)	0	11.302	7	2	2	2	629	68.7	8.47	4.23	2	0	0.849	0.964419	21.61	108.2	91.8	30.84	5.11	High	Peak Found	Peak Found	Peak Found	Not Found	Peak Found	1		3	2	Present Both	1	GLYMA_02G165500	GLYMA_02G165500	sp|Q9SS48|SDP6_ARATH	Glycerol-3-phosphate dehydrogenase SDP6, mitochondrial GN=SDP6	ident:496/629 pos:555/629 query:629 hit:629 align:603 bit:1039.6	OK	Glycerol-3-phosphate dehydrogenase SDP6, mitochondrial	Protein SUGAR-DEPENDENT 6	SDP6_ARATH	Q9SS48	na	SDP6	na	Arabidopsis thaliana (Mouse-ear cress)	3702
High	Master Protein	GLYMA_07G034800	1.13.11.12//1.13.11.58 - Linoleate 13S-lipoxygenase / Lipoxidase // Linoleate 9S-lipoxygenase / Linoleate 9-lipoxygenase (1 of 3)	0	73.621	12	7	31	3	865	96.3	7.02	88.98	7	0	1.004	0.997622	10.1	131.1	68.9		6.86	High	High	High	High	High	High	1		3	3	Present Both	1	GLYMA_07G034800	GLYMA_07G034800	sp|Q06327|LOX1_ARATH	Linoleate 9S-lipoxygenase 1 GN=LOX1	ident:500/865 pos:638/865 query:865 hit:859 align:886 bit:1008.4	OK	Linoleate 9S-lipoxygenase 1	Lipoxygenase 1 (AtLOX1)	LOX1_ARATH	Q06327	Q9FZ30	LOX1	na	Arabidopsis thaliana (Mouse-ear cress)	3702
High	Master Protein	GLYMA_07G039800	1.14.13.21 - Flavonoid 3'-monooxygenase / Flavonoid 3'-hydroxylase (1 of 19)	0	13.907	4	2	11	2	516	59	8.65	21.03	2	0	1.135	0.937912	75.76	98.2	101.8	42.05	31.29	High	High	Peak Found	High	High	High	1		3	3	Present Both	1	GLYMA_07G039800	GLYMA_07G039800	sp|Q9SD85|F3PH_ARATH	Flavonoid 3'-monooxygenase GN=CYP75B1	ident:215/516 pos:307/516 query:516 hit:513 align:511 bit:424.1	Poor_match	Flavonoid 3'-monooxygenase	Cytochrome P450 75B1; Flavonoid 3'-hydroxylase (AtF3'H); Protein TRANSPARENT TESTA 7	F3PH_ARATH	Q9SD85	na	CYP75B1	F3'H; TT7	Arabidopsis thaliana (Mouse-ear cress)	3702
High	Master Protein	GLYMA_08G004800	1.2.1.76 - Succinate-semialdehyde dehydrogenase (acetylating) / Succinyl-CoA reductase (1 of 2)	0	52.195	16	5	15	5	427	45.4	7.99	43.16	5	0	1.502	0.642895	64.26	61.9	138.1	55.69	61.91	High	High	High	High	High	High	1		3	3	Present Both	1	GLYMA_08G004800	GLYMA_08G004800	sp|Q9CAZ2|ADH1_ARATH	Alcohol dehydrogenase class-P GN=ADH1	ident:121/427 pos:187/427 query:427 hit:379 align:379 bit:164.9	Poor_match	Alcohol dehydrogenase class-P (AtADH)	na	ADH1_ARATH	P06525	O04080; O04713; O04717; O04868; O23821; Q8LA61; Q94AY6; Q9CAZ2; Q9CAZ3; Q9SX08	ADH1	na	Arabidopsis thaliana (Mouse-ear cress)	3702
High	Master Protein	GLYMA_11G103500.2.p	1.3.1.72 - Delta(24)-sterol reductase / Lanosterol Delta(24)-reductase (1 of 2)	0	173.181	26	14	81	3	567	66	8.21	242.03	14	13	0.898	0.986581	60.03	119.5	80.5	40.37	49.5	High	High	High	High	High	High	1		3	3	Present Both	1	GLYMA_11G103500.2.p	GLYMA_11G103500.2.p	sp|Q39085|DIM_ARATH	Delta(24)-sterol reductase GN=DIM	ident:475/567 pos:510/567 query:567 hit:561 align:564 bit:992.6	OK	Delta(24)-sterol reductase	Cell elongation protein DIMINUTO; Cell elongation protein Dwarf1; Protein CABBAGE1; Protein ENHANCED VERY-LOW-FLUENCE RESPONSE 1	DIM_ARATH	Q39085	Q0WWL4; Q38808; Q8RXF4	DIM	CBB1; DWF1; EVE1	Arabidopsis thaliana (Mouse-ear cress)	3702
High	Master Protein	GLYMA_12G028300.2.p	1.3.1.72 - Delta(24)-sterol reductase / Lanosterol Delta(24)-reductase (1 of 2)	0	149.776	25	13	74	2	567	66	8.22	211.43	13	0	2.131	0.188243	42.99	59.2	140.8	16.59	55.22	High	High	High	High	High	High	1		3	3	Present Both	1	GLYMA_12G028300.2.p	GLYMA_12G028300.2.p	sp|Q39085|DIM_ARATH	Delta(24)-sterol reductase GN=DIM	ident:480/567 pos:511/567 query:567 hit:561 align:564 bit:999.2	OK	Delta(24)-sterol reductase	Cell elongation protein DIMINUTO; Cell elongation protein Dwarf1; Protein CABBAGE1; Protein ENHANCED VERY-LOW-FLUENCE RESPONSE 1	DIM_ARATH	Q39085	Q0WWL4; Q38808; Q8RXF4	DIM	CBB1; DWF1; EVE1	Arabidopsis thaliana (Mouse-ear cress)	3702
High	Master Protein	GLYMA_02G166300	1.3.2.3 - L-galactonolactone dehydrogenase / L-galactono-gamma-lactone dehydrogenase (1 of 2)	0	6.366	2	1	4	1	584	66.3	7.96	10.74	1	0	0.797	0.927038	64.01	159.4	40.6	54.25	87.08	High	Peak Found	Peak Found	High	High	High	1		3	3	Present Both	1	GLYMA_02G166300	GLYMA_02G166300	sp|Q9SU56|GLDH_ARATH	L-galactono-1,4-lactone dehydrogenase, mitochondrial GN=GLDH	ident:442/584 pos:491/584 query:584 hit:610 align:551 bit:932.9	OK	L-galactono-1,4-lactone dehydrogenase, mitochondrial	na	GLDH_ARATH	Q9SU56	B3H4I4; Q8GY16; Q9MAX4	GLDH	na	Arabidopsis thaliana (Mouse-ear cress)	3702
High	Master Protein	GLYMA_20G018300.5.p	1.3.5.1 - Succinate dehydrogenase (quinone) / Succinic dehydrogenase (1 of 9)	0	34.103	30	3	10	3	141	15.8	7.56	35.33	3	0	0.486	0.318897	15.81	106.1	93.9	108.06	48.95	High	High	High	High	Peak Found	High	1		3	3	Present Both	1	GLYMA_20G018300.5.p	GLYMA_20G018300.5.p	sp|Q941A6|SDH6_ARATH	Succinate dehydrogenase subunit 6, mitochondrial GN=SDH6	ident:92/141 pos:111/141 query:141 hit:142 align:130 bit:207.6	OK	Succinate dehydrogenase subunit 6, mitochondrial	na	SDH6_ARATH	Q941A6	na	SDH6	na	Arabidopsis thaliana (Mouse-ear cress)	3702
High	Master Protein	GLYMA_04G179700	1.3.5.1 - Succinate dehydrogenase (quinone) / Succinic dehydrogenase (1 of 9)	0	25.746	33	3	16	3	95	10.9	9.94	41.18	3	0	0.816	0.940144	20.94	107.7	92.3	61.11	18.49	High	High	High	High	High	High	1		3	3	Present Both	1	GLYMA_04G179700	GLYMA_04G179700	sp|Q3E870|SDH7B_ARATH	Succinate dehydrogenase subunit 7B, mitochondrial GN=SDH7B	ident:62/95 pos:74/95 query:95 hit:100 align:93 bit:113.2	OK	Succinate dehydrogenase subunit 7B, mitochondrial	na	SDH7B_ARATH	Q3E870	Q8LBU0	SDH7B	na	Arabidopsis thaliana (Mouse-ear cress)	3702
High	Master Protein	GLYMA_19G080600	1.3.5.1//1.3.99.1 - Succinate dehydrogenase (quinone) / Succinic dehydrogenase (1 of 1)	0	79.009	34	9	44	9	277	31.1	8.62	105.47	9	0	1.042	0.978903	42.57	102.1	97.9	36.92	24.46	High	High	High	High	High	High	1		3	3	Present Both	1	GLYMA_19G080600	GLYMA_19G080600	sp|Q8LB02|SDHB2_ARATH	Succinate dehydrogenase [ubiquinone] iron-sulfur subunit 2, mitochondrial GN=SDH2-2	ident:220/277 pos:238/277 query:277 hit:280 align:277 bit:455.3	OK	Succinate dehydrogenase [ubiquinone] iron-sulfur subunit 2, mitochondrial	Iron-sulfur subunit of complex II (Ip)	SDHB2_ARATH	Q8LB02	Q9FM32; Q9G3L9	SDH2-2	na	Arabidopsis thaliana (Mouse-ear cress)	3702
High	Master Protein	GLYMA_05G134900	1.6.5.3 - NADH:ubiquinone reductase (H(+)-translocating) / Ubiquinone reductase (1 of 59)	0	109.874	60	5	43	5	108	12.3	7.34	194.63	5	0	0.761	0.899245	25.99	121.8	78.2	23.29	13.85	High	High	High	High	High	High	1		3	3	Present Both	1	GLYMA_05G134900	GLYMA_05G134900	sp|F4I460|MYO8_ARATH	Myosin-8 GN=XI-B	ident:16/108 pos:27/108 query:108 hit:1500 align:51 bit:28.1	Partial_match_both	Myosin-8	Myosin XI B (AtXIB)	MYO8_ARATH	F4I460	O64491	XI-B	XIB	Arabidopsis thaliana (Mouse-ear cress)	3702
High	Master Protein	GLYMA_07G130200	1.6.5.3 - NADH:ubiquinone reductase (H(+)-translocating) / Ubiquinone reductase (1 of 59)	0	11.502	25	3	14	3	75	8.7	8.53	24.37	3	0	0.727	0.870366	7.22	118.2	81.8	8.13	14.38	High	High	High	High	High	High	1		3	3	Present Both	1	GLYMA_07G130200	GLYMA_07G130200	sp|Q9FJ87|DTX50_ARATH	Protein DETOXIFICATION 50 GN=DTX50	ident:13/75 pos:18/75 query:75 hit:505 align:34 bit:26.2	Partial_match_both	Protein DETOXIFICATION 50 (AtDTX50)	DETOXIFICATION EFFLUX CARRIER 50; Multidrug and toxic compound extrusion protein 50 (MATE protein 50); Protein ABNORMAL SHOOT 3-like 1	DTX50_ARATH	Q9FJ87	Q7FLS2	DTX50	na	Arabidopsis thaliana (Mouse-ear cress)	3702
High	Master Protein	GLYMA_08G104300	1.6.99.3 - NADH dehydrogenase / Type I dehydrogenase (1 of 23)	0	107.262	66	7	45	7	91	11.2	8.18	167.54	7	0	0.976	0.999223	30.58	86	114	9.82	47.95	High	High	High	High	High	High	1		3	3	Present Both	1	GLYMA_08G104300	GLYMA_08G104300	sp|Q9SS87|SEOB_ARATH	Protein SIEVE ELEMENT OCCLUSION B GN=SEOB	ident:20/91 pos:32/91 query:91 hit:740 align:66 bit:30.4	Partial_match_hit	Protein SIEVE ELEMENT OCCLUSION B (AtSEOb)	Protein SIEVE ELEMENT OCCLUSION-RELATED 1 (AtSEOR1)	SEOB_ARATH	Q9SS87	na	SEOB	na	Arabidopsis thaliana (Mouse-ear cress)	3702
Medium	Master Protein	GLYMA_05G133200	2.1.1.181 - 23S rRNA (adenine(1618)-N(6))-methyltransferase / rRNA large subunit methyltransferase F (1 of 2)	0.025	1.264	2	1	2	1	488	54.5	7.74	0	1	0	0.914	0.997622	13.04	104.5	95.5	14.8		High	High	Not Found	Not Found	Peak Found	Not Found	1	Phospho [H410]	2	1	Only Control	1	GLYMA_05G133200	GLYMA_05G133200	sp|O65790|C81F1_ARATH	Cytochrome P450 81F1 GN=CYP81F1	ident:22/488 pos:39/488 query:488 hit:500 align:85 bit:28.5	Partial_match_both	Cytochrome P450 81F1	na	C81F1_ARATH	O65790	Q7FBW2; Q8LBE7; Q9SZU3	CYP81F1	CYP91A2	Arabidopsis thaliana (Mouse-ear cress)	3702
High	Master Protein	GLYMA_10G124700	2.3.1.16 - Acetyl-CoA C-acyltransferase / Beta-ketothiolase (1 of 4)	0	70.855	22	7	22	7	463	48.6	7.8	60.21	7	0	1.048	0.976873	48.49	85.4	114.6	48.35	31.8	High	High	Peak Found	High	High	High	1		3	3	Present Both	1	GLYMA_10G124700	GLYMA_10G124700	sp|Q56WD9|THIK2_ARATH	3-ketoacyl-CoA thiolase 2, peroxisomal GN=PED1	ident:393/463 pos:430/463 query:463 hit:462 align:462 bit:803.5	OK	3-ketoacyl-CoA thiolase 2, peroxisomal	Acetyl-CoA acyltransferase 2; Beta-ketothiolase 2; Peroxisomal 3-oxoacyl-CoA thiolase 2; Peroxisome defective protein 1	THIK2_ARATH	Q56WD9	Q93Z35; Q9S7M3	PED1	KAT2	Arabidopsis thaliana (Mouse-ear cress)	3702
High	Master Protein	GLYMA_02G292500	2.3.1.61 - Dihydrolipoyllysine-residue succinyltransferase / Succinyl-CoA:dihydrolipoate S-succinyltransferase (1 of 2)	0	203.305	34	17	88	7	464	50.5	9.23	288.06	17	11	1.833	0.365818	67.75	58.8	141.2	31.99	1.66	High	High	High	High	High	High	1		3	3	Present Both	1	GLYMA_02G292500	GLYMA_02G292500	sp|Q8H107|ODO2B_ARATH	Dihydrolipoyllysine-residue succinyltransferase component of 2-oxoglutarate dehydrogenase complex 2, mitochondrial GN=BCDH BETA1	ident:314/464 pos:364/464 query:464 hit:464 align:468 bit:606.3	OK	Dihydrolipoyllysine-residue succinyltransferase component of 2-oxoglutarate dehydrogenase complex 2, mitochondrial	2-oxoglutarate dehydrogenase complex component E2-2 (OGDC-E2-2); Dihydrolipoamide succinyltransferase component of 2-oxoglutarate dehydrogenase complex 2; E2K-2	ODO2B_ARATH	Q8H107	Q3E9W2; Q8LGI7; Q9SZ31	OrderedLocusNames=At4g26910	na	Arabidopsis thaliana (Mouse-ear cress)	3702
High	Master Protein	GLYMA_02G308500	2.3.1.9 - Acetyl-CoA C-acetyltransferase / Acetoacetyl-CoA thiolase (1 of 4)	0	56.662	20	4	15	4	407	41.6	6.57	50.88	4	0	0.703	0.83963	24.67	85.3	114.7	87.51	23.19	High	High	High	High	High	High	1		3	3	Present Both	1	GLYMA_02G308500	GLYMA_02G308500	sp|Q8S4Y1|THIC1_ARATH	Acetyl-CoA acetyltransferase, cytosolic 1 GN=AAT1	ident:344/407 pos:376/407 query:407 hit:403 align:402 bit:681.0	OK	Acetyl-CoA acetyltransferase, cytosolic 1	Cytosolic acetoacetyl-CoA thiolase 1 (Thiolase 1); Protein EMBRYO DEFECTIVE 1276	THIC1_ARATH	Q8S4Y1	Q93YW6; Q9LUB1	AAT1	EMB1276	Arabidopsis thaliana (Mouse-ear cress)	3702
High	Master Protein	GLYMA_08G311200	2.3.3.1 - Citrate (Si)-synthase / Citrate oxaloacetate-lyase ((pro-3S)-CH(2)COO->acetyl-CoA) (1 of 6)	0	65.737	16	8	25	8	513	56.4	9.2	76.36	8	0	1.271	0.863917	74.34	88.8	111.2	7.71	12.29	High	High	Peak Found	High	High	High	1		3	3	Present Both	1	GLYMA_08G311200	GLYMA_08G311200	sp|Q9LXS6|CISY2_ARATH	Citrate synthase 2, peroxisomal GN=CSY2	ident:389/513 pos:437/513 query:513 hit:514 align:509 bit:818.5	OK	Citrate synthase 2, peroxisomal	na	CISY2_ARATH	Q9LXS6	Q570I4	CSY2	na	Arabidopsis thaliana (Mouse-ear cress)	3702
High	Master Protein	GLYMA_06G101700	2.5.1.54 - 3-deoxy-7-phosphoheptulonate synthase / Phospho-2-oxo-3-deoxyheptonate aldolase (1 of 4)	0	8.786	3	1	4	1	516	57.6	8.02	10.9	1	0	0.419	0.166662	13.25	154.7	45.3	83.23	55.25	High	Not Found	Peak Found	Peak Found	High	High	1		2	3	Present Both	1	GLYMA_06G101700	GLYMA_06G101700	sp|Q00218|AROG_ARATH	Phospho-2-dehydro-3-deoxyheptonate aldolase 2, chloroplastic GN=DHS2	ident:366/516 pos:409/516 query:516 hit:507 align:451 bit:797.3	OK	Phospho-2-dehydro-3-deoxyheptonate aldolase 2, chloroplastic	3-deoxy-D-arabino-heptulosonate 7-phosphate synthase 2; DAHP synthase 2; Phospho-2-keto-3-deoxyheptonate aldolase 2	AROG_ARATH	Q00218	Q9SZC8	DHS2	na	Arabidopsis thaliana (Mouse-ear cress)	3702
High	Master Protein	GLYMA_11G146900	2.7.1.107 - Diacylglycerol kinase (ATP) / Diglyceride kinase (1 of 23)	0.008	1.935	5	1	2	1	164	16.4	9.6	1.7	1	0	3.145	0.0135026	40.19	47	153	16.63	44.99	High	Peak Found	Not Found	High	Peak Found	Peak Found	1		2	3	Present Both	1	GLYMA_11G146900	GLYMA_11G146900	sp|F4HWL3|RLP4_ARATH	Receptor-like protein 4 GN=RLP4	ident:18/164 pos:27/164 query:164 hit:626 align:38 bit:42.4	Partial_match_both	Receptor-like protein 4 (AtRLP4)	na	RLP4_ARATH	F4HWL3	Q9SGN1	RLP4	na	Arabidopsis thaliana (Mouse-ear cress)	3702
High	Master Protein	GLYMA_10G069500	2.7.11.1 - Non-specific serine/threonine protein kinase / Threonine-specific protein kinase (1 of 2306)	0	6.085	3	3	7	3	932	102.6	5.77	9.83	3	0	1.163	0.919239	56.66	94	106	38.02	84	High	High	Peak Found	Peak Found	High	Peak Found	1		3	3	Present Both	1	GLYMA_10G069500	GLYMA_10G069500	sp|Q9LT96|Y5977_ARATH	Probable leucine-rich repeat receptor-like protein kinase At5g49770 GN=YKT62	ident:474/932 pos:638/932 query:932 hit:946 align:942 bit:854.4	Poor_match	Probable leucine-rich repeat receptor-like protein kinase At5g49770	na	Y5977_ARATH	Q9LT96	na	OrderedLocusNames=At5g49770	na	Arabidopsis thaliana (Mouse-ear cress)	3702
High	Master Protein	GLYMA_11G017900	2.7.8.11//6.2.1.3 - CDP-diacylglycerol--inositol 3-phosphatidyltransferase / Phosphatidylinositol synthase // Long-chain-fatty-acid--CoA ligase / Lignoceroyl-CoA synthase (1 of 3)	0	15.345	2	1	7	1	663	74	7.66	18.34	1	0	1.25	0.870768	87.95	114.8	85.2	53.3	40.55	High	High	High	High	High	High	1		3	3	Present Both	1	GLYMA_11G017900	GLYMA_11G017900	sp|Q9T0A0|LACS4_ARATH	Long chain acyl-CoA synthetase 4 GN=LACS4	ident:490/663 pos:577/663 query:663 hit:666 align:658 bit:1053.5	OK	Long chain acyl-CoA synthetase 4	na	LACS4_ARATH	Q9T0A0	na	LACS4	na	Arabidopsis thaliana (Mouse-ear cress)	3702
High	Master Protein	GLYMA_10G263700	3.1.3.16//3.1.3.48//3.1.3.67 - Protein-serine/threonine phosphatase / Serine/threonine specific protein phosphatase // Protein-tyrosine-phosphatase / PTPase // Phosphatidylinositol-3,4,5-trisphosphate 3-phosphatase / Phosphatidylinositol-3,4,5-trisphosphate 3-phosphohydrolase (1 of 3)	0	18.913	5	2	4	1	622	68.8	6.28	13.47	2	0	2.437	0.0899403	43.98	58.2	141.8		40.22	High	Not Found	Peak Found	High	High	Not Found	1		2	2	Present Both	1	GLYMA_10G263700	GLYMA_10G263700	sp|Q9LT75|PTN2A_ARATH	Phosphatidylinositol 3,4,5-trisphosphate 3-phosphatase and protein-tyrosine-phosphatase PTEN2A GN=PTEN2A	ident:414/622 pos:477/622 query:622 hit:611 align:603 bit:852.0	OK	Phosphatidylinositol 3,4,5-trisphosphate 3-phosphatase and protein-tyrosine-phosphatase PTEN2A	Protein PHOSPHATASE AND TENSIN HOMOLOG 2-a (AtPTEN2; AtPTEN2a)	PTN2A_ARATH	Q9LT75	Q8GZT8	PTEN2A	na	Arabidopsis thaliana (Mouse-ear cress)	3702
High	Master Protein	GLYMA_20G085500	3.1.3.2 - Acid phosphatase / Phosphomonoesterase (1 of 61)	0	18.351	10	2	5	1	272	31.3	8.68	19.47	2	0	0.452	0.240695	1.06	137.7	62.3		4.93	High	Not Found	Peak Found	High	Not Found	High	1		2	2	Present Both	1	GLYMA_20G085500	GLYMA_20G085500	sp|O49195|VSP1_ARATH	Vegetative storage protein 1 GN=VSP1	ident:87/272 pos:128/272 query:272 hit:270 align:233 bit:154.5	Poor_match	Vegetative storage protein 1	na	VSP1_ARATH	O49195	O23827; O82121; Q39259; Q42000; Q93VJ6	VSP1	na	Arabidopsis thaliana (Mouse-ear cress)	3702
High	Master Protein	GLYMA_02G260600	3.1.31.1 - Micrococcal nuclease / Micrococcal endonuclease (1 of 5)	0	15.814	17	5	10	5	335	37.6	9.16	16.08	5	0	1.985	0.264119	67.39	62.3	137.7	76.13	9.69	High	High	Peak Found	High	High	High	1		3	3	Present Both	1	GLYMA_02G260600	GLYMA_02G260600	sp|F4IH31|CAN2_ARATH	Staphylococcal-like nuclease CAN2 GN=CAN2	ident:233/335 pos:281/335 query:335 hit:332 align:332 bit:497.7	OK	Staphylococcal-like nuclease CAN2	Calcium-dependent nuclease 2 (AtCAN2; Ca(2+)-dependent nuclease 2)	CAN2_ARATH	F4IH31	Q8RWK9; Q9SIY4	CAN2	na	Arabidopsis thaliana (Mouse-ear cress)	3702
High	Master Protein	GLYMA_01G111300	3.2.1.162 - Lambda-carrageenase / Endo-beta-1,4-carrageenose 2,6,2'-trisulfate-hydrolase (1 of 2)	0	19.052	3	3	8	3	887	98.9	5.03	23.4	3	0	0.696	0.831963	24.55	111.9	88.1	22.48	8.01	High	High	Peak Found	High	High	High	1		3	3	Present Both	1	GLYMA_01G111300	GLYMA_01G111300	sp|F4IYM4|DEX1_ARATH	Protein DEFECTIVE IN EXINE FORMATION 1 GN=DEX1	ident:616/887 pos:709/887 query:887 hit:896 align:872 bit:1213.8	OK	Protein DEFECTIVE IN EXINE FORMATION 1	na	DEX1_ARATH	F4IYM4	B3H6A9; F4IYM3; Q84TH7; Q9FV29; Q9FV30; Q9SS78	DEX1	na	Arabidopsis thaliana (Mouse-ear cress)	3702
High	Master Protein	GLYMA_07G256100	3.2.1.17 - Lysozyme / Muramidase (1 of 5)	0	35.82	16	3	5	3	240	25.6	6.34	18.13	3	0	2.065	0.223735	18.58	56.5	143.5		10.74	High	Peak Found	Peak Found	High	Peak Found	High	1		3	3	Present Both	1	GLYMA_07G256100	GLYMA_07G256100	sp|Q94B35|ISPH_ARATH	4-hydroxy-3-methylbut-2-enyl diphosphate reductase, chloroplastic GN=ISPH	ident:28/240 pos:43/240 query:240 hit:466 align:97 bit:34.3	Partial_match_both	4-hydroxy-3-methylbut-2-enyl diphosphate reductase, chloroplastic	Protein CHLOROPLAST BIOGENESIS 6	ISPH_ARATH	Q94B35	B9DHZ9; Q56WI5; Q5EGH0; Q9SZ00	ISPH	CLB6; HDR	Arabidopsis thaliana (Mouse-ear cress)	3702
High	Master Protein	GLYMA_01G081300	3.2.1.177 - Alpha-D-xyloside xylohydrolase / Alpha-xylosidase (1 of 3)	0	37.673	5	5	22	5	928	102.9	6.7	62.46	5	0	1.126	0.940144	97.31	60.6	139.4	106.82	45.44	High	High	High	High	High	High	1		3	3	Present Both	1	GLYMA_01G081300	GLYMA_01G081300	sp|Q9S7Y7|XYL1_ARATH	Alpha-xylosidase 1 GN=XYL1	ident:682/928 pos:782/928 query:928 hit:915 align:900 bit:1459.9	OK	Alpha-xylosidase 1	na	XYL1_ARATH	Q9S7Y7	P80846; Q9ZP26	XYL1	AXY3	Arabidopsis thaliana (Mouse-ear cress)	3702
High	Master Protein	GLYMA_18G237300	3.4.24.84 - Ste24 endopeptidase / Prenyl protein-specific endoprotease 1 (1 of 2)	0	11.403	3	1	4	1	424	48.3	7.01	8.04	1	0	1.692	0.46529	23.82	74.3	125.7	16.34	27.38	High	Not Found	Peak Found	High	Peak Found	High	1		2	3	Present Both	1	GLYMA_18G237300	GLYMA_18G237300	sp|Q8RX88|FACE1_ARATH	CAAX prenyl protease 1 homolog GN=FACE1	ident:360/424 pos:388/424 query:424 hit:424 align:424 bit:745.7	OK	CAAX prenyl protease 1 homolog	Farnesylated proteins-converting enzyme 1 (AtFACE-1; FACE-1); Prenyl protein-specific endoprotease 1; Zinc metalloproteinase Ste24 homolog (AtSTE24)	FACE1_ARATH	Q8RX88	O04602; Q93ZV9; Q94FS8; Q9M139	FACE1	STE24	Arabidopsis thaliana (Mouse-ear cress)	3702
High	Master Protein	GLYMA_09G255600	3.4.24.84 - Ste24 endopeptidase / Prenyl protein-specific endoprotease 1 (1 of 2)	0	9.338	3	1	7	1	424	48.5	7.43	17.98	1	0	1.028	0.98584	48.51	115.9	84.1	34.22	35.33	High	High	Peak Found	High	Peak Found	High	1		3	3	Present Both	1	GLYMA_09G255600	GLYMA_09G255600	sp|Q8RX88|FACE1_ARATH	CAAX prenyl protease 1 homolog GN=FACE1	ident:355/424 pos:382/424 query:424 hit:424 align:424 bit:736.1	OK	CAAX prenyl protease 1 homolog	Farnesylated proteins-converting enzyme 1 (AtFACE-1; FACE-1); Prenyl protein-specific endoprotease 1; Zinc metalloproteinase Ste24 homolog (AtSTE24)	FACE1_ARATH	Q8RX88	O04602; Q93ZV9; Q94FS8; Q9M139	FACE1	STE24	Arabidopsis thaliana (Mouse-ear cress)	3702
High	Master Protein	GLYMA_06G317300	3.5.1.26 - N(4)-(beta-N-acetylglucosaminyl)-L-asparaginase / N-aspartyl-beta-glucosaminidase (1 of 2)	0.009	1.971	5	1	1	1	356	38	6.44	0	1	0	0.686	0.816281	1.66	118.6	81.4		4.19	High	Not Found	Not Found	Peak Found	Peak Found	Peak Found	1		1	3	Only Sample	1	GLYMA_06G317300	GLYMA_06G317300	sp|Q56W64|ASPG3_ARATH	Probable isoaspartyl peptidase/L-asparaginase 3 GN=ASK5	ident:255/356 pos:293/356 query:356 hit:359 align:342 bit:532.7	OK	Isoaspartyl peptidase/L-asparaginase 3 subunit beta	L-asparagine amidohydrolase 3	ASPG3_ARATH	Q56W64	Q27GI5; Q5M760; Q9FKG7	OrderedLocusNames=At5g61540	na	Arabidopsis thaliana (Mouse-ear cress)	3702
High	Master Protein	GLYMA_03G055900	3.5.4.17//3.5.4.6 - AMP deaminase / Myoadenylate deaminase (1 of 2)	0	8.369	4	3	5	3	847	96.2	6.83	5.62	3	0	0.882	0.978903	13.61	105	95	22.27	8.99	High	High	Peak Found	High	High	High	1		3	3	Present Both	1	GLYMA_03G055900	GLYMA_03G055900	sp|O80452|AMPD_ARATH	AMP deaminase GN=AMPD	ident:665/847 pos:726/847 query:847 hit:839 align:854 bit:1350.1	OK	AMP deaminase (AtAMPD)	Protein EMBRYONIC FACTOR 1	AMPD_ARATH	O80452	B9DFX9; Q56XX1; Q93ZR9	AMPD	na	Arabidopsis thaliana (Mouse-ear cress)	3702
High	Master Protein	GLYMA_15G186100	3.5.4.3 - Guanine deaminase / Guanine aminase (1 of 8)	0	25.212	21	3	6	3	186	20.6	6.13	14.19	3	0	1.939	0.282622	24.43	98.8	101.2	52.97	39.45	High	High	Peak Found	Peak Found	High	High	1	Acetyl [N-Term]	3	3	Present Both	1	GLYMA_15G186100	GLYMA_15G186100	sp|Q94BU8|GSDA_ARATH	Guanosine deaminase GN=GSDA	ident:143/186 pos:166/186 query:186 hit:185 align:186 bit:304.7	OK	Guanosine deaminase	tRNA-specific adenosine deaminase TAD4 (AtTAD4)	GSDA_ARATH	Q94BU8	na	GSDA	na	Arabidopsis thaliana (Mouse-ear cress)	3702
High	Master Protein	GLYMA_08G050100	3.6.4.9 - Chaperonin ATPase / Chaperonin (1 of 3)	0	55.018	17	4	7	4	533	57.6	7.28	22.61	4	0	2.221	0.154352	9.27	62.1	137.9	0.6	65.08	High	High	Not Found	High	Peak Found	High	1		2	3	Present Both	1	GLYMA_08G050100	GLYMA_08G050100	sp|Q9LV21|TCPD_ARATH	T-complex protein 1 subunit delta GN=CCT4	ident:476/533 pos:515/533 query:533 hit:536 align:536 bit:972.2	OK	T-complex protein 1 subunit delta (TCP-1-delta)	CCT-delta; Chaperonin CCT4	TCPD_ARATH	Q9LV21	Q8L994	CCT4	na	Arabidopsis thaliana (Mouse-ear cress)	3702
High	Master Protein	GLYMA_11G209300	3.7.1.17//3.7.1.8 - 2,6-dioxo-6-phenylhexa-3-enoate hydrolase / HOHPDA hydrolase (1 of 3)	0	9.023	5	2	6	2	376	42	7.69	13.67	2	0	0.606	0.628465	20.16	139.5	60.5	42.73	30.83	High	High	Peak Found	High	High	Peak Found	1		3	3	Present Both	1	GLYMA_11G209300	GLYMA_11G209300	sp|Q9FJ24|BDG2_ARATH	Probable lysophospholipase BODYGUARD 2 GN=BDG2	ident:58/376 pos:114/376 query:376 hit:471 align:283 bit:40.0	Poor_match	Probable lysophospholipase BODYGUARD 2 (AtBDG2)	na	BDG2_ARATH	Q9FJ24	na	BDG2	na	Arabidopsis thaliana (Mouse-ear cress)	3702
High	Master Protein	GLYMA_14G189400	4.1.2.13 - Fructose-bisphosphate aldolase / Fructose-1,6-bisphosphate triosephosphate-lyase (1 of 15)	0	297.285	62	21	144	9	358	38.3	7.53	462.76	21	11	1.156	0.92572	58.77	86.6	113.4	21.54	3.76	High	High	High	High	High	High	1		3	3	Present Both	1	GLYMA_14G189400	GLYMA_14G189400	sp|Q9SJQ9|ALFC6_ARATH	Fructose-bisphosphate aldolase 6, cytosolic GN=FBA6	ident:313/358 pos:332/358 query:358 hit:358 align:358 bit:647.1	OK	Fructose-bisphosphate aldolase 6, cytosolic (AtFBA6)	Cytosolic aldolase 2 (cAld2)	ALFC6_ARATH	Q9SJQ9	na	FBA6	na	Arabidopsis thaliana (Mouse-ear cress)	3702
High	Master Protein	GLYMA_02G222400	4.1.2.13 - Fructose-bisphosphate aldolase / Fructose-1,6-bisphosphate triosephosphate-lyase (1 of 15)	0	196.498	53	16	104	5	358	38.2	7.55	317.24	16	0	0.901	0.989375	27.97	97.1	102.9	16.97	2.75	High	High	High	High	High	High	1		3	3	Present Both	1	GLYMA_02G222400	GLYMA_02G222400	sp|Q9SJQ9|ALFC6_ARATH	Fructose-bisphosphate aldolase 6, cytosolic GN=FBA6	ident:307/358 pos:331/358 query:358 hit:358 align:358 bit:639.8	OK	Fructose-bisphosphate aldolase 6, cytosolic (AtFBA6)	Cytosolic aldolase 2 (cAld2)	ALFC6_ARATH	Q9SJQ9	na	FBA6	na	Arabidopsis thaliana (Mouse-ear cress)	3702
High	Master Protein	GLYMA_03G191500	4.1.2.13 - Fructose-bisphosphate aldolase / Fructose-1,6-bisphosphate triosephosphate-lyase (1 of 15)	0	113.093	20	6	56	1	358	38.5	6.79	154.15	6	0	1.188	0.915533	20.66	91.1	108.9	28.7	9.1	High	Peak Found	Peak Found	High	Not Found	High	1		3	2	Present Both	1	GLYMA_03G191500	GLYMA_03G191500	sp|Q9SJQ9|ALFC6_ARATH	Fructose-bisphosphate aldolase 6, cytosolic GN=FBA6	ident:312/358 pos:330/358 query:358 hit:358 align:358 bit:647.9	OK	Fructose-bisphosphate aldolase 6, cytosolic (AtFBA6)	Cytosolic aldolase 2 (cAld2)	ALFC6_ARATH	Q9SJQ9	na	FBA6	na	Arabidopsis thaliana (Mouse-ear cress)	3702
High	Master Protein	GLYMA_10G006500	K00025 - malate dehydrogenase (MDH1) (1 of 3)	0	71.719	20	5	22	5	328	35.2	6.3	67.64	5	0	1.201	0.900435	80.67	110.7	89.3	73.44	33.64	High	High	Peak Found	High	High	High	1		3	3	Present Both	1	GLYMA_10G006500	GLYMA_10G006500	sp|P57106|MDHC2_ARATH	Malate dehydrogenase 2, cytoplasmic GN=MDH2	ident:298/328 pos:317/328 query:328 hit:332 align:332 bit:599.4	OK	Malate dehydrogenase 2, cytoplasmic	Cytosolic NAD-dependent malate dehydrogenase 2 (cNAD-MDH2); Cytosolic malate dehydrogenase 2 (Cytosolic MDH2)	MDHC2_ARATH	P57106	Q8LA78; Q9LSX3	MDH2	na	Arabidopsis thaliana (Mouse-ear cress)	3702
High	Master Protein	GLYMA_08G020500	K00033 - 6-phosphogluconate dehydrogenase (PGD, gnd, gntZ) (1 of 4)	0	67.88	11	4	21	4	495	53.7	6.57	63.57	4	0	1.098	0.950994	24.78	80.4	119.6	21.38	36.33	High	High	Peak Found	High	High	High	1		3	3	Present Both	1	GLYMA_08G020500	GLYMA_08G020500	sp|Q9FFR3|6PGD2_ARATH	6-phosphogluconate dehydrogenase, decarboxylating 2, chloroplastic GN=4CLL8	ident:424/495 pos:462/495 query:495 hit:487 align:487 bit:887.9	OK	6-phosphogluconate dehydrogenase, decarboxylating 2, chloroplastic	na	6PGD2_ARATH	Q9FFR3	Q8LG34	OrderedLocusNames=At5g41670	na	Arabidopsis thaliana (Mouse-ear cress)	3702
High	Master Protein	GLYMA_12G210000	K00053 - ketol-acid reductoisomerase (ilvC) (1 of 3)	0	17.196	7	3	9	3	586	63.3	7.3	21.96	3	0	1.073	0.971334	34.38	130.1	69.9	18.12	51.23	High	High	High	High	High	High	1		3	3	Present Both	1	GLYMA_12G210000	GLYMA_12G210000	sp|Q05758|ILV5_ARATH	Ketol-acid reductoisomerase, chloroplastic GN=ILR3	ident:472/586 pos:506/586 query:586 hit:591 align:532 bit:1001.1	OK	Ketol-acid reductoisomerase, chloroplastic	Acetohydroxy-acid reductoisomerase; Alpha-keto-beta-hydroxylacyl reductoisomerase	ILV5_ARATH	Q05758	Q42559	OrderedLocusNames=At3g58610	na	Arabidopsis thaliana (Mouse-ear cress)	3702
High	Master Protein	GLYMA_11G248000	K00059 - 3-oxoacyl- (fabG) (1 of 4)	0	17.858	11	3	6	3	320	33.9	9.28	11.1	3	0	0.716	0.849882	43.4	150.7	49.3	51.65	90.34	High	Peak Found	High	High	Peak Found	High	1		3	3	Present Both	1	GLYMA_11G248000	GLYMA_11G248000	sp|P33207|FABG_ARATH	3-oxoacyl-[acyl-carrier-protein] reductase, chloroplastic GN=RAT5	ident:211/320 pos:256/320 query:320 hit:319 align:309 bit:429.1	OK	3-oxoacyl-[acyl-carrier-protein] reductase, chloroplastic	3-ketoacyl-acyl carrier protein reductase	FABG_ARATH	P33207	O04463; Q9FPJ6	OrderedLocusNames=At1g24360	na	Arabidopsis thaliana (Mouse-ear cress)	3702
High	Master Protein	GLYMA_12G027300	K00208 - enoyl- (fabI) (1 of 4)	0	16.309	10	3	7	3	461	49.5	9.04	17.86	3	0	0.652	0.752529	31.32	115.3	84.7	41.93	76.68	High	Peak Found	Peak Found	High	High	High	1		3	3	Present Both	1	GLYMA_12G027300	GLYMA_12G027300	sp|Q9SLA8|FABI_ARATH	Enoyl-[acyl-carrier-protein] reductase [NADH], chloroplastic GN=MOD1	ident:283/461 pos:320/461 query:461 hit:390 align:387 bit:565.8	OK	Enoyl-[acyl-carrier-protein] reductase [NADH], chloroplastic (ENR)	NADH-dependent enoyl-ACP reductase 1; Protein MOSAIC DEATH 1	FABI_ARATH	Q9SLA8	O04942; Q9FEF2; Q9M672	MOD1	ENR-A; ENR1	Arabidopsis thaliana (Mouse-ear cress)	3702
High	Master Protein	GLYMA_05G062200	K00232 - acyl-CoA oxidase (E1.3.3.6, ACOX1, ACOX3) (1 of 9)	0	15.009	3	2	3	2	665	74.5	8.1	7	2	0	1.134	0.938989	100.73	94	106	54.02	17.77	High	Peak Found	Peak Found	High	Peak Found	High	1	Acetyl [N-Term]	3	3	Present Both	1	GLYMA_05G062200	GLYMA_05G062200	sp|O65202|ACOX1_ARATH	Peroxisomal acyl-coenzyme A oxidase 1 GN=ACX1	ident:537/665 pos:596/665 query:665 hit:664 align:665 bit:1136.7	OK	Peroxisomal acyl-coenzyme A oxidase 1 (AOX 1)	Long-chain acyl-CoA oxidase (AtCX1)	ACOX1_ARATH	O65202	O23518	ACX1	na	Arabidopsis thaliana (Mouse-ear cress)	3702
High	Master Protein	GLYMA_01G175600	K00234 - succinate dehydrogenase (ubiquinone) flavoprotein subunit (SDHA, SDH1) (1 of 3)	0	73.068	14	9	27	9	630	69.3	6.67	78.56	9	0	1.346	0.814318	60.16	85.1	114.9	42.11	36.06	High	High	High	High	High	High	1		3	3	Present Both	1	GLYMA_01G175600	GLYMA_01G175600	sp|O82663|SDHA1_ARATH	Succinate dehydrogenase [ubiquinone] flavoprotein subunit 1, mitochondrial GN=SDH1-1	ident:564/630 pos:605/630 query:630 hit:634 align:634 bit:1159.0	OK	Succinate dehydrogenase [ubiquinone] flavoprotein subunit 1, mitochondrial	Flavoprotein subunit 1 of complex II (FP)	SDHA1_ARATH	O82663	na	SDH1-1	na	Arabidopsis thaliana (Mouse-ear cress)	3702
High	Master Protein	GLYMA_02G066500	K00411 - ubiquinol-cytochrome c reductase iron-sulfur subunit (UQCRFS1, RIP1, petA) (1 of 3)	0	73.178	9	3	12	3	266	29.3	8.66	66.53	3	0	1.369	0.797388	53.82	61.7	138.3	101.32	10.87	High	Peak Found	High	High	Not Found	High	1		3	2	Present Both	1	GLYMA_02G066500	GLYMA_02G066500	sp|Q94JS0|UCRI1_ARATH	Cytochrome b-c1 complex subunit Rieske-1, mitochondrial GN=UCR1-1	ident:201/266 pos:221/266 query:266 hit:272 align:277 bit:400.2	OK	Cytochrome b-c1 complex subunit Rieske-1, mitochondrial	Complex III subunit 5-1; Rieske iron-sulfur protein 1 (RISP1); Ubiquinol-cytochrome c reductase iron-sulfur subunit 1	UCRI1_ARATH	Q94JS0	Q42140; Q56Z01; Q56Z95; Q8LEK8; Q9LYR3	UCR1-1	na	Arabidopsis thaliana (Mouse-ear cress)	3702
High	Master Protein	GLYMA_05G074400	K00413 - ubiquinol-cytochrome c reductase cytochrome c1 subunit (CYC1, CYT1, petC) (1 of 4)	0	36.964	16	3	12	3	308	33.9	7.21	32.68	3	0	1.041	0.978903	38.89	98.1	101.9	15.48	14.03	High	High	Peak Found	High	High	High	1		3	3	Present Both	1	GLYMA_05G074400	GLYMA_05G074400	sp|Q9FKS5|CYC1B_ARATH	Cytochrome c1 2, heme protein, mitochondrial GN=CYC12	ident:258/308 pos:280/308 query:308 hit:307 align:308 bit:497.7	OK	Cytochrome c1 2, heme protein, mitochondrial	Complex III subunit 4-2; Complex III subunit IV-2; Cytochrome b-c1 complex subunit 4-2; Ubiquinol-cytochrome-c reductase complex cytochrome c1 subunit 2 (Cytochrome c-1 2)	CYC1B_ARATH	Q9FKS5	F4KIR8; Q0WL66; Q0WNJ4; Q42065; Q94A63	CYC12	na	Arabidopsis thaliana (Mouse-ear cress)	3702
High	Master Protein	GLYMA_17G208000	K00417 - ubiquinol-cytochrome c reductase subunit 7 (QCR7, UQCRB) (1 of 2)	0	340.112	75	16	167	3	122	14.5	9.58	551.79	16	18	1.255	0.870366	68.08	81.7	118.3	16.66	28.68	High	High	High	High	High	High	1		3	3	Present Both	1	GLYMA_17G208000	GLYMA_17G208000	sp|F4JWS8|QCR72_ARATH	Cytochrome b-c1 complex subunit 7-2 GN=QCR7-2	ident:97/122 pos:110/122 query:122 hit:122 align:122 bit:206.1	OK	Cytochrome b-c1 complex subunit 7-2	Complex III subunit VII	QCR72_ARATH	F4JWS8	na	QCR7-2	na	Arabidopsis thaliana (Mouse-ear cress)	3702
High	Master Protein	GLYMA_14G126300	K00417 - ubiquinol-cytochrome c reductase subunit 7 (QCR7, UQCRB) (1 of 2)	0	281.453	75	15	136	2	122	14.6	9.61	413.87	15	0	3.315	0.00860669	39.41	32.3	167.7	69.89	60.74	High	High	High	High	High	High	1		3	3	Present Both	1	GLYMA_14G126300	GLYMA_14G126300	sp|F4JWS8|QCR72_ARATH	Cytochrome b-c1 complex subunit 7-2 GN=QCR7-2	ident:98/122 pos:110/122 query:122 hit:122 align:122 bit:205.7	OK	Cytochrome b-c1 complex subunit 7-2	Complex III subunit VII	QCR72_ARATH	F4JWS8	na	QCR7-2	na	Arabidopsis thaliana (Mouse-ear cress)	3702
High	Master Protein	GLYMA_03G195700	K00419 - ubiquinol-cytochrome c reductase subunit 9 (QCR9, UCRC) (1 of 2)	0	109.575	85	10	57	10	71	8.1	9.6	162.6	10	0	0.82	0.942767	46.61	106.7	93.3	21.27	14.87	High	High	High	High	High	High	1		3	3	Present Both	1	GLYMA_03G195700	GLYMA_03G195700	sp|Q9SHE9|LBD4_ARATH	LOB domain-containing protein 4 GN=LBD4	ident:16/71 pos:34/71 query:71 hit:172 align:65 bit:28.1	Partial_match_hit	LOB domain-containing protein 4	ASYMMETRIC LEAVES 2-like protein 6 (AS2-like protein 6)	LBD4_ARATH	Q9SHE9	B7XG60; Q6DBF5	LBD4	ASL6	Arabidopsis thaliana (Mouse-ear cress)	3702
High	Master Protein	GLYMA_13G153500	K00419 - ubiquinol-cytochrome c reductase subunit 9 (QCR9, UCRC) (1 of 2)	0	23.054	29	3	23	3	73	8.4	9.25	54.87	3	0	0.796	0.927038	13.99	108.3	91.7	11.09	3.39	High	High	High	High	High	High	1		3	3	Present Both	1	GLYMA_13G153500	GLYMA_13G153500	sp|Q9LHF0|ZHD9_ARATH	Zinc-finger homeodomain protein 9 GN=ZHD9	ident:11/73 pos:12/73 query:73 hit:312 align:19 bit:26.6	Partial_match_both	Zinc-finger homeodomain protein 9 (AtZHD9)	Homeobox protein 34 (AtHB-34)	ZHD9_ARATH	Q9LHF0	na	ZHD9	HB34	Arabidopsis thaliana (Mouse-ear cress)	3702
High	Master Protein	GLYMA_16G164400	K00430 - peroxidase (E1.11.1.7) (1 of 157)	0	419.078	42	26	214	26	345	38.1	6.44	763.57	26	0	0.504	0.370097	19.68	160.5	39.5	36.51	68.72	High	High	High	High	High	High	1		3	3	Present Both	1	GLYMA_16G164400	GLYMA_16G164400	sp|Q96520|PER12_ARATH	Peroxidase 12 GN=PER12	ident:159/345 pos:205/345 query:345 hit:358 align:319 bit:306.2	Poor_match	Peroxidase 12 (Atperox P12)	ATP4a; PRXR6	PER12_ARATH	Q96520	Q43734	PER12	P12	Arabidopsis thaliana (Mouse-ear cress)	3702
High	Master Protein	GLYMA_14G201700	K00430 - peroxidase (E1.11.1.7) (1 of 157)	0	154.016	43	14	42	13	359	40	9.54	121.12	14	1	1.764	0.404454	74.35	24.2	175.8	112.41	54.08	High	Peak Found	High	High	High	High	1		3	3	Present Both	1	GLYMA_14G201700	GLYMA_14G201700	sp|Q9FLC0|PER52_ARATH	Peroxidase 52 GN=PER52	ident:175/359 pos:220/359 query:359 hit:324 align:304 bit:345.9	Poor_match	Peroxidase 52 (Atperox P52)	ATP49	PER52_ARATH	Q9FLC0	na	PER52	P52	Arabidopsis thaliana (Mouse-ear cress)	3702
High	Master Protein	GLYMA_16G164200	K00430 - peroxidase (E1.11.1.7) (1 of 157)	0	90.81	34	10	35	9	345	37.8	7.36	102.27	10	1	0.599	0.609576	15.25	123.5	76.5	9.3	64.8	High	High	High	High	High	High	1		3	3	Present Both	1	GLYMA_16G164200	GLYMA_16G164200	sp|Q96520|PER12_ARATH	Peroxidase 12 GN=PER12	ident:185/345 pos:245/345 query:345 hit:358 align:347 bit:368.2	OK	Peroxidase 12 (Atperox P12)	ATP4a; PRXR6	PER12_ARATH	Q96520	Q43734	PER12	P12	Arabidopsis thaliana (Mouse-ear cress)	3702
High	Master Protein	GLYMA_10G222500	K00430 - peroxidase (E1.11.1.7) (1 of 157)	0	81.919	34	9	24	9	352	37.9	7.83	76.95	9	0	0.691	0.831431	9.93	110.8	89.2	62.99	16.66	High	High	Peak Found	High	High	High	1		3	3	Present Both	1	GLYMA_10G222500	GLYMA_10G222500	sp|Q96520|PER12_ARATH	Peroxidase 12 GN=PER12	ident:181/352 pos:240/352 query:352 hit:358 align:349 bit:357.1	Poor_match	Peroxidase 12 (Atperox P12)	ATP4a; PRXR6	PER12_ARATH	Q96520	Q43734	PER12	P12	Arabidopsis thaliana (Mouse-ear cress)	3702
High	Master Protein	GLYMA_03G208200	K00430 - peroxidase (E1.11.1.7) (1 of 157)	0	19.21	5	1	6	1	324	35.5	8.12	17.32	1	0	0.942	0.999223	36.63	88.2	111.8	13.15	22.98	High	High	Peak Found	High	Peak Found	High	1		3	3	Present Both	1	GLYMA_03G208200	GLYMA_03G208200	sp|O23044|PER3_ARATH	Peroxidase 3 GN=PER3	ident:176/324 pos:229/324 query:324 hit:326 align:327 bit:347.4	OK	Peroxidase 3 (Atperox P3)	ATPRC; RCI3A; Rare cold-inducible protein	PER3_ARATH	O23044	na	PER3	P3; RCI3	Arabidopsis thaliana (Mouse-ear cress)	3702
High	Master Protein	GLYMA_02G262500	K00522 - ferritin heavy chain (FTH1) (1 of 9)	0	22.314	19	3	4	3	250	28.1	6.89	9.26	3	0	0.73	0.870366	26.95	119.9	80.1	23.67	63.86	High	Peak Found	Peak Found	Peak Found	High	Peak Found	1		3	3	Present Both	1	GLYMA_02G262500	GLYMA_02G262500	sp|Q9S756|FRI4_ARATH	Ferritin-4, chloroplastic GN=FER4	ident:166/250 pos:180/250 query:250 hit:259 align:198 bit:340.5	OK	Ferritin-4, chloroplastic	na	FRI4_ARATH	Q9S756	Q8WHW5	FER4	na	Arabidopsis thaliana (Mouse-ear cress)	3702
High	Master Protein	GLYMA_16G038300	K00549 - 5-methyltetrahydropteroyltriglutamate--homocysteine methyltransferase (metE) (1 of 6)	0	168.033	19	14	44	7	763	84.2	6.33	142.19	14	3	0.989	0.999223	81.55	101.3	98.7	48.63	13.6	High	High	High	High	High	High	1		3	3	Present Both	1	GLYMA_16G038300	GLYMA_16G038300	sp|O50008|METE1_ARATH	5-methyltetrahydropteroyltriglutamate--homocysteine methyltransferase 1 GN=MS1	ident:673/763 pos:718/763 query:763 hit:765 align:762 bit:1421.0	OK	5-methyltetrahydropteroyltriglutamate--homocysteine methyltransferase 1	Cobalamin-independent methionine synthase 1 (AtMS1); Vitamin-B12-independent methionine synthase 1	METE1_ARATH	O50008	Q6KCR2; Q8H162; Q93ZK3	MS1	CIMS	Arabidopsis thaliana (Mouse-ear cress)	3702
High	Master Protein	GLYMA_10G090500	K00559 - sterol 24-C-methyltransferase (E2.1.1.41, SMT1, ERG6) (1 of 4)	0	5.559	8	2	4	2	340	38.6	6.65	6.15	2	0	1.063	0.976873	99.55	97.4	102.6	35.58	77.29	High	Peak Found	Peak Found	Peak Found	High	High	1		3	3	Present Both	1	GLYMA_10G090500	GLYMA_10G090500	sp|Q9LM02|SMT1_ARATH	Cycloartenol-C-24-methyltransferase GN=SMT1	ident:292/340 pos:319/340 query:340 hit:336 align:336 bit:628.2	OK	Cycloartenol-C-24-methyltransferase	24-sterol C-methyltransferase 1 (Sterol C-methyltransferase 1); Protein CEPHALOPOD; Protein STEROL METHYLTRANSFERASE 1	SMT1_ARATH	Q9LM02	Q8LKW1	SMT1	CPH	Arabidopsis thaliana (Mouse-ear cress)	3702
High	Master Protein	GLYMA_08G108900	K00600 - glycine hydroxymethyltransferase (glyA, SHMT) (1 of 12)	0	36.168	8	4	8	4	572	63.1	7.97	25.74	4	0	0.53	0.431777	10.33	131.9	68.1	3.63	36.08	High	High	High	High	Peak Found	High	1		3	3	Present Both	1	GLYMA_08G108900	GLYMA_08G108900	sp|O23254|GLYC4_ARATH	Serine hydroxymethyltransferase 4 GN=SHM4	ident:420/572 pos:445/572 query:572 hit:471 align:502 bit:872.8	OK	Serine hydroxymethyltransferase 4 (AtSHMT4)	Glycine hydroxymethyltransferase 4; Serine methylase 4	GLYC4_ARATH	O23254	Q8LBY1; Q9FPJ3	SHM4	SHMT4	Arabidopsis thaliana (Mouse-ear cress)	3702
High	Master Protein	GLYMA_03G027500	K00615 - transketolase (E2.2.1.1, tktA, tktB) (1 of 4)	0	86.727	16	9	20	9	731	78.9	6.87	54.18	9	0	0.911	0.993116	15.25	57	143	12.09	22.28	High	High	Peak Found	High	High	High	1		3	3	Present Both	1	GLYMA_03G027500	GLYMA_03G027500	sp|F4IW47|TKTC2_ARATH	Transketolase-2, chloroplastic GN=TKL-2	ident:601/731 pos:659/731 query:731 hit:741 align:740 bit:1255.3	OK	Transketolase-2, chloroplastic (TK)	na	TKTC2_ARATH	F4IW47	O22143; Q93ZH6	TKL-2	na	Arabidopsis thaliana (Mouse-ear cress)	3702
High	Master Protein	GLYMA_08G362900	K00616 - transaldolase (E2.2.1.2, talA, talB) (1 of 10)	0	40.017	14	4	12	4	439	47.9	6.21	35.12	4	0	1.246	0.874733	75.43	163.3	36.7	61.45	85.39	High	High	High	High	High	High	1		3	3	Present Both	1	GLYMA_08G362900	GLYMA_08G362900	sp|O82333|GH31_ARATH	Probable indole-3-acetic acid-amido synthetase GH3.1 GN=GH3.1	ident:21/439 pos:35/439 query:439 hit:590 align:71 bit:33.1	Partial_match_both	Probable indole-3-acetic acid-amido synthetase GH3.1	Auxin-responsive GH3-like protein 1 (AtGH3-1)	GH31_ARATH	O82333	na	GH3.1	na	Arabidopsis thaliana (Mouse-ear cress)	3702
High	Master Protein	GLYMA_20G114500	K00627 - pyruvate dehydrogenase E2 component (dihydrolipoamide acetyltransferase) (DLAT, aceF, pdhC) (1 of 7)	0	125.517	25	9	44	6	506	52.7	8.16	160.37	9	2	1.386	0.779003	35.65	74	126	9.49	5.83	High	High	High	High	High	High	1		3	3	Present Both	1	GLYMA_20G114500	GLYMA_20G114500	sp|Q9SQI8|ODP24_ARATH	Dihydrolipoyllysine-residue acetyltransferase component 4 of pyruvate dehydrogenase complex, chloroplastic GN=LTA2	ident:348/506 pos:389/506 query:506 hit:480 align:507 bit:616.3	OK	Dihydrolipoyllysine-residue acetyltransferase component 4 of pyruvate dehydrogenase complex, chloroplastic	Dihydrolipoamide S-acetyltransferase component 4 of pyruvate dehydrogenase complex; Pyruvate dehydrogenase complex component E2 4 (PDC-E2 4; PDCE2 4; plE2)	ODP24_ARATH	Q9SQI8	Q9LUA6	LTA2	na	Arabidopsis thaliana (Mouse-ear cress)	3702
High	Master Protein	GLYMA_01G159800	K00831 - phosphoserine aminotransferase (serC, PSAT1) (1 of 3)	0	37.325	10	3	15	3	413	45.5	8.24	49.39	3	0	1.233	0.882627	39.11	63.9	136.1	23.47	42.37	High	High	High	High	High	High	1		3	3	Present Both	1	GLYMA_01G159800	GLYMA_01G159800	sp|Q96255|SERB1_ARATH	Phosphoserine aminotransferase 1, chloroplastic GN=PSAT1	ident:316/413 pos:350/413 query:413 hit:430 align:389 bit:664.8	OK	Phosphoserine aminotransferase 1, chloroplastic (AtPSAT1)	Phosphohydroxythreonine aminotransferase	SERB1_ARATH	Q96255	Q1EBU1; Q8L7P0; Q8LBA3	PSAT1	na	Arabidopsis thaliana (Mouse-ear cress)	3702
High	Master Protein	GLYMA_09G007900	K00895 - pyrophosphate--fructose-6-phosphate 1-phosphotransferase (E2.7.1.90, pfk) (1 of 8)	0	33.251	10	4	10	4	562	61.4	7.03	32.78	4	0	1.046	0.976873	42.83	96.3	103.7	27.16	2.98	High	Peak Found	High	High	High	High	1		3	3	Present Both	1	GLYMA_09G007900	GLYMA_09G007900	sp|Q8W4M5|PFPB1_ARATH	Pyrophosphate--fructose 6-phosphate 1-phosphotransferase subunit beta 1 GN=PFP-BETA1	ident:483/562 pos:514/562 query:562 hit:566 align:567 bit:991.5	OK	Pyrophosphate--fructose 6-phosphate 1-phosphotransferase subunit beta 1 (PFP 1)	6-phosphofructokinase, pyrophosphate dependent 1; PPi-PFK 1; Pyrophosphate-dependent 6-phosphofructose-1-kinase 1	PFPB1_ARATH	Q8W4M5	O65379	PFP-BETA1	na	Arabidopsis thaliana (Mouse-ear cress)	3702
High	Master Protein	GLYMA_07G115900	K00940 - nucleoside-diphosphate kinase (ndk, NME) (1 of 8)	0	106.877	60	10	49	10	149	16.5	6.8	150.93	10	0	0.704	0.83963	29.17	121.9	78.1	13.23	3.09	High	High	High	High	High	High	1		3	3	Present Both	1	GLYMA_07G115900	GLYMA_07G115900	sp|P39207|NDK1_ARATH	Nucleoside diphosphate kinase 1 GN=NDK1	ident:128/149 pos:136/149 query:149 hit:149 align:147 bit:268.9	OK	Nucleoside diphosphate kinase 1	Nucleoside diphosphate kinase I (NDK I; NDP kinase I; NDPK I)	NDK1_ARATH	P39207	F4JJZ8; Q41989; Q94JY5	NDK1	NDPK1	Arabidopsis thaliana (Mouse-ear cress)	3702
High	Master Protein	GLYMA_06G307800	K01061 - carboxymethylenebutenolidase (E3.1.1.45) (1 of 3)	0	16.781	12	2	6	2	269	29.3	7.58	17.49	2	0	1.006	0.995165	27.46	95.8	104.2	21.94	36.49	High	Peak Found	High	High	Peak Found	High	1		3	3	Present Both	1	GLYMA_06G307800	GLYMA_06G307800	sp|Q84WK4|SOBR1_ARATH	Carboxylesterase SOBER1 GN=SOBER1	ident:43/269 pos:60/269 query:269 hit:228 align:135 bit:44.3	Partial_match_query	Carboxylesterase SOBER1	Phospholipase A2 SOBER1; Protein SUPPRESSOR OF AVRBST-ELICITED RESISTANCE 1	SOBR1_ARATH	Q84WK4	A4KWB0; O49635	SOBER1	na	Arabidopsis thaliana (Mouse-ear cress)	3702
High	Master Protein	GLYMA_08G108800	K01251 - adenosylhomocysteinase (E3.3.1.1, ahcY) (1 of 3)	0	12.129	8	3	6	3	485	53.3	5.88	7.2	3	0	0.833	0.949231	4.78	96.7	103.3	64.62	36	High	High	High	High	High	High	1		3	3	Present Both	1	GLYMA_08G108800	GLYMA_08G108800	sp|O23255|SAHH1_ARATH	Adenosylhomocysteinase 1 GN=SAHH1	ident:449/485 pos:470/485 query:485 hit:485 align:485 bit:930.2	OK	Adenosylhomocysteinase 1 (AdoHcyase 1)	Protein EMBRYO DEFECTIVE 1395; Protein HOMOLOGY-DEPENDENT GENE SILENCING 1; S-adenosyl-L-homocysteine hydrolase 1 (SAH hydrolase 1)	SAHH1_ARATH	O23255	O81847; Q8LE20	SAHH1	EMB1395; HOG1	Arabidopsis thaliana (Mouse-ear cress)	3702
High	Master Protein	GLYMA_08G199900	K01412 - mitochondrial-processing peptidase subunit alpha [EC:3.4.24.64] (PMPCA, MAS2) (1 of 6)	0	308.419	34	18	84	4	505	54.4	6.21	302.1	18	18	0.879	0.976873	43.29	107.1	92.9	16	6.02	High	High	High	High	High	High	1		3	3	Present Both	1	GLYMA_08G199900	GLYMA_08G199900	sp|Q9ZU25|MPPA1_ARATH	Probable mitochondrial-processing peptidase subunit alpha-1, mitochondrial GN=MORF9	ident:348/505 pos:406/505 query:505 hit:503 align:506 bit:664.1	OK	Probable mitochondrial-processing peptidase subunit alpha-1, mitochondrial	Alpha-MPP 1	MPPA1_ARATH	Q9ZU25	Q0WW81; Q8L9K3	OrderedLocusNames=At1g51980	na	Arabidopsis thaliana (Mouse-ear cress)	3702
High	Master Protein	GLYMA_08G031800	K01412 - mitochondrial-processing peptidase subunit alpha [EC:3.4.24.64] (PMPCA, MAS2) (1 of 6)	0	254.609	39	18	103	7	509	54.8	5.77	397.58	18	10	1.099	0.950346	40.46	82.5	117.5	4.95	23.25	High	High	High	High	High	High	1	Phospho [Y496; R508]	3	3	Present Both	1	GLYMA_08G031800	GLYMA_08G031800	sp|Q9ZU25|MPPA1_ARATH	Probable mitochondrial-processing peptidase subunit alpha-1, mitochondrial GN=MORF9	ident:329/509 pos:393/509 query:509 hit:503 align:508 bit:632.5	OK	Probable mitochondrial-processing peptidase subunit alpha-1, mitochondrial	Alpha-MPP 1	MPPA1_ARATH	Q9ZU25	Q0WW81; Q8L9K3	OrderedLocusNames=At1g51980	na	Arabidopsis thaliana (Mouse-ear cress)	3702
High	Master Protein	GLYMA_05G225000	K01412 - mitochondrial-processing peptidase subunit alpha [EC:3.4.24.64] (PMPCA, MAS2) (1 of 6)	0	153.764	33	14	53	3	511	55.1	5.94	155.34	14	0	0.909	0.99265	55.2	89.2	110.8	67.31	35.3	High	Peak Found	Peak Found	High	Peak Found	High	1		3	3	Present Both	1	GLYMA_05G225000	GLYMA_05G225000	sp|Q9ZU25|MPPA1_ARATH	Probable mitochondrial-processing peptidase subunit alpha-1, mitochondrial GN=MORF9	ident:330/511 pos:396/511 query:511 hit:503 align:510 bit:629.0	OK	Probable mitochondrial-processing peptidase subunit alpha-1, mitochondrial	Alpha-MPP 1	MPPA1_ARATH	Q9ZU25	Q0WW81; Q8L9K3	OrderedLocusNames=At1g51980	na	Arabidopsis thaliana (Mouse-ear cress)	3702
High	Master Protein	GLYMA_07G028500	K01507 - inorganic pyrophosphatase (ppa) (1 of 18)	0	43.359	8	3	14	3	768	80.7	5.58	60.54	3	0	0.729	0.870366	20.67	113.7	86.3	21.55	49.73	High	High	High	High	High	High	1		3	3	Present Both	1	GLYMA_07G028500	GLYMA_07G028500	sp|P31414|AVP1_ARATH	Pyrophosphate-energized vacuolar membrane proton pump 1 GN=AVP1	ident:691/768 pos:729/768 query:768 hit:770 align:766 bit:1399.0	OK	Pyrophosphate-energized vacuolar membrane proton pump 1	Pyrophosphate-energized inorganic pyrophosphatase 1 (H(+)-PPase 1); Vacuolar proton pyrophosphatase 1; Vacuolar proton pyrophosphatase 3	AVP1_ARATH	P31414	O80390; Q41919; Q41920; Q56WP6; Q8RY20; Q8VZE3	AVP1	AVP; AVP-3; AVP3	Arabidopsis thaliana (Mouse-ear cress)	3702
High	Master Protein	GLYMA_11G113900	K01527 - nascent polypeptide-associated complex subunit beta (EGD1, BTF3) (1 of 4)	0	143.465	48	10	37	7	162	17.7	7.4	168.31	10	3	0.674	0.804361	30.01	101.9	98.1	97.51	14.5	High	Peak Found	High	High	High	High	1		3	3	Present Both	1	GLYMA_11G113900	GLYMA_11G113900	sp|Q9SMW7|BTF3_ARATH	Basic transcription factor 3 GN=BTF3	ident:132/162 pos:139/162 query:162 hit:165 align:152 bit:259.2	OK	Basic transcription factor 3 (AtBTF3)	Nascent polypeptide-associated complex subunit beta	BTF3_ARATH	Q9SMW7	Q93ZB5	BTF3	na	Arabidopsis thaliana (Mouse-ear cress)	3702
High	Master Protein	GLYMA_17G061800	K01535 - H+-transporting ATPase (E3.6.3.6) (1 of 24)	0	374.118	22	22	130	1	953	104.8	6.87	453.85	22	0	1.52	0.624646	76.48	108.6	91.4	37.58	75.98	High	High	Peak Found	High	High	High	1	Phospho [T952]	3	3	Present Both	1	GLYMA_17G061800	GLYMA_17G061800	sp|P19456|PMA2_ARATH	ATPase 2, plasma membrane-type GN=AHA2	ident:828/953 pos:883/953 query:953 hit:948 align:947 bit:1660.6	OK	ATPase 2, plasma membrane-type	Proton pump 2	PMA2_ARATH	P19456	na	AHA2	na	Arabidopsis thaliana (Mouse-ear cress)	3702
High	Master Protein	GLYMA_14G134100	K01535 - H+-transporting ATPase (E3.6.3.6) (1 of 24)	0	328.562	18	22	115	1	951	104.6	7.21	411.05	22	2	1.299	0.842254	15.53	66.2	133.8	7.85	6.42	High	High	Not Found	Not Found	High	High	1	Phospho [T950]	2	2	Present Both	1	GLYMA_14G134100	GLYMA_14G134100	sp|Q9SJB3|PMA5_ARATH	ATPase 5, plasma membrane-type GN=AHA5	ident:831/951 pos:893/951 query:951 hit:949 align:946 bit:1708.7	OK	ATPase 5, plasma membrane-type	Proton pump 5	PMA5_ARATH	Q9SJB3	F4IPQ2	AHA5	na	Arabidopsis thaliana (Mouse-ear cress)	3702
High	Master Protein	GLYMA_09G061200.5.p	K01537 - Ca2+-transporting ATPase (E3.6.3.8) (1 of 29)	0	66.886	6	4	20	4	1085	117.8	7.83	70.73	4	0	1.571	0.570033	71.62	105	95	61.73	63.13	High	High	High	High	High	High	1		3	3	Present Both	1	GLYMA_09G061200.5.p	GLYMA_09G061200.5.p	sp|Q9LF79|ACA8_ARATH	Calcium-transporting ATPase 8, plasma membrane-type GN=ACA8	ident:805/1085 pos:922/1085 query:1085 hit:1074 align:1086 bit:1617.8	OK	Calcium-transporting ATPase 8, plasma membrane-type	Ca(2+)-ATPase isoform 8	ACA8_ARATH	Q9LF79	Q9LU75	ACA8	na	Arabidopsis thaliana (Mouse-ear cress)	3702
High	Master Protein	GLYMA_15G167500.4.p	K01537 - Ca2+-transporting ATPase (E3.6.3.8) (1 of 29)	0	25.16	3	2	7	2	1082	117.8	7.93	22.93	2	0	0.86	0.976355	78.22	157.6	42.4	54.02	109.07	High	High	Peak Found	High	High	High	1		3	3	Present Both	1	GLYMA_15G167500.4.p	GLYMA_15G167500.4.p	sp|Q9LF79|ACA8_ARATH	Calcium-transporting ATPase 8, plasma membrane-type GN=ACA8	ident:802/1082 pos:919/1082 query:1082 hit:1074 align:1079 bit:1618.2	OK	Calcium-transporting ATPase 8, plasma membrane-type	Ca(2+)-ATPase isoform 8	ACA8_ARATH	Q9LF79	Q9LU75	ACA8	na	Arabidopsis thaliana (Mouse-ear cress)	3702
High	Master Protein	GLYMA_15G072500	K01652 - acetolactate synthase I/II/III large subunit (E2.2.1.6L, ilvB, ilvG, ilvI) (1 of 5)	0	21.356	7	4	7	2	653	70.9	6.55	19.9	4	1	0.657	0.763996	30.21	156.5	43.5	26.71	71.47	High	Peak Found	Not Found	Not Found	High	Not Found	1		2	1	Only Control	1	GLYMA_15G072500	GLYMA_15G072500	sp|P17597|ILVB_ARATH	Acetolactate synthase, chloroplastic GN=ALS	ident:489/653 pos:537/653 query:653 hit:670 align:586 bit:1033.9	OK	Acetolactate synthase, chloroplastic (AtALS)	Acetohydroxy-acid synthase; Protein CHLORSULFURON RESISTANT 1	ILVB_ARATH	P17597	A0A174; Q5FV34; Q8L7Y7; Q94B64	ALS	AHAS; CSR1; TZP5	Arabidopsis thaliana (Mouse-ear cress)	3702
Medium	Master Protein	GLYMA_12G098900	K01681 - aconitate hydratase (ACO, acnA) (1 of 6)	0.011	1.762	1	1	2	1	984	107.6	6.96	0	1	0	0.818	0.940144	13.64	110	90	1.03	26.65	High	High	Not Found	Peak Found	Peak Found	Peak Found	1		2	3	Present Both	1	GLYMA_12G098900	GLYMA_12G098900	sp|Q9SIB9|ACO3M_ARATH	Aconitate hydratase 3, mitochondrial GN=ACO3	ident:816/984 pos:877/984 query:984 hit:990 align:933 bit:1720.7	OK	Aconitate hydratase 3, mitochondrial (Aconitase 3; mACO1)	Citrate hydro-lyase 3	ACO3M_ARATH	Q9SIB9	Q8L784	ACO3	na	Arabidopsis thaliana (Mouse-ear cress)	3702
High	Master Protein	GLYMA_07G162900	K01723 - hydroperoxide dehydratase (AOS) (1 of 4)	0	200.084	35	15	86	15	522	58.7	8.53	277.97	15	0	1.029	0.98584	52.3	89.8	110.2	14.35	5.56	High	High	High	High	High	High	1		3	3	Present Both	1	GLYMA_07G162900	GLYMA_07G162900	sp|Q96242|CP74A_ARATH	Allene oxide synthase, chloroplastic GN=CYP74A	ident:247/522 pos:337/522 query:522 hit:518 align:513 bit:487.3	Poor_match	Allene oxide synthase, chloroplastic	Cytochrome P450 74A; Hydroperoxide dehydrase	CP74A_ARATH	Q96242	P93720; Q9ZR51	CYP74A	AOS	Arabidopsis thaliana (Mouse-ear cress)	3702
High	Master Protein	GLYMA_11G122700	K01723 - hydroperoxide dehydratase (AOS) (1 of 4)	0	28.429	10	4	11	4	478	53.5	6.87	18.84	4	0	1.071	0.974149	38.64	103.7	96.3	70.79	14.32	High	High	Peak Found	Peak Found	High	High	1		3	3	Present Both	1	GLYMA_11G122700	GLYMA_11G122700	sp|Q96242|CP74A_ARATH	Allene oxide synthase, chloroplastic GN=CYP74A	ident:239/478 pos:321/478 query:478 hit:518 align:470 bit:484.6	Poor_match	Allene oxide synthase, chloroplastic	Cytochrome P450 74A; Hydroperoxide dehydrase	CP74A_ARATH	Q96242	P93720; Q9ZR51	CYP74A	AOS	Arabidopsis thaliana (Mouse-ear cress)	3702
High	Master Protein	GLYMA_20G241500	K01859 - chalcone isomerase (E5.5.1.6) (1 of 4)	0	88.871	46	7	20	6	218	23.3	6.7	62.71	7	1	0.862	0.976873	59.67	102.5	97.5	16.95	28.91	High	Peak Found	High	High	Peak Found	High	1		3	3	Present Both	1	GLYMA_20G241500	GLYMA_20G241500	sp|P41088|CFI1_ARATH	Chalcone--flavonone isomerase 1 GN=CHI1	ident:109/218 pos:147/218 query:218 hit:246 align:209 bit:220.7	Poor_match	Chalcone--flavonone isomerase 1 (Chalcone isomerase 1)	Protein TRANSPARENT TESTA 5	CFI1_ARATH	P41088	Q8W532; Q9LE13; Q9LF74; Q9LF75	CHI1	CFI; TT5	Arabidopsis thaliana (Mouse-ear cress)	3702
High	Master Protein	GLYMA_16G213200	K01899 - succinyl-CoA synthetase alpha subunit (LSC1) (1 of 2)	0	9.134	7	2	5	1	325	33.9	8.76	6.02	2	1	1.059	0.976873	4.16	96.8	103.2	63.68	14.91	High	Not Found	Peak Found	Not Found	Not Found	Not Found	1		2	0	Only Control	1	GLYMA_16G213200	GLYMA_16G213200	sp|Q8LAD2|SUCA2_ARATH	Succinate--CoA ligase [ADP-forming] subunit alpha-2, mitochondrial GN=SUC9	ident:273/325 pos:289/325 query:325 hit:341 align:307 bit:557.8	OK	Succinate--CoA ligase [ADP-forming] subunit alpha-2, mitochondrial	Succinyl-CoA synthetase subunit alpha-2 (SCS-alpha-2)	SUCA2_ARATH	Q8LAD2	O82661; P53586; Q9FMX5	OrderedLocusNames=At5g23250	na	Arabidopsis thaliana (Mouse-ear cress)	3702
High	Master Protein	GLYMA_09G164900	K01899 - succinyl-CoA synthetase alpha subunit (LSC1) (1 of 2)	0	8.168	7	2	6	1	324	33.8	8.76	6.02	2	0	0.765	0.902084	62.93	145.6	54.4	69.92	117.28	High	High	Peak Found	Not Found	Peak Found	Peak Found	1		3	2	Present Both	1	GLYMA_09G164900	GLYMA_09G164900	sp|Q8LAD2|SUCA2_ARATH	Succinate--CoA ligase [ADP-forming] subunit alpha-2, mitochondrial GN=SUC9	ident:276/324 pos:294/324 query:324 hit:341 align:319 bit:557.0	OK	Succinate--CoA ligase [ADP-forming] subunit alpha-2, mitochondrial	Succinyl-CoA synthetase subunit alpha-2 (SCS-alpha-2)	SUCA2_ARATH	Q8LAD2	O82661; P53586; Q9FMX5	OrderedLocusNames=At5g23250	na	Arabidopsis thaliana (Mouse-ear cress)	3702
High	Master Protein	GLYMA_18G195900	K01962 - acetyl-CoA carboxylase carboxyl transferase subunit alpha (accA) (1 of 3)	0	21.853	3	3	6	3	690	76.9	8.51	6.89	3	0	1.042	0.978903	41.71	84	116	15.28	33.89	High	Peak Found	High	High	High	High	1		3	3	Present Both	1	GLYMA_18G195900	GLYMA_18G195900	sp|Q9LD43|ACCA_ARATH	Acetyl-coenzyme A carboxylase carboxyl transferase subunit alpha, chloroplastic GN=CAC3	ident:417/690 pos:525/690 query:690 hit:769 align:665 bit:845.1	OK	Acetyl-coenzyme A carboxylase carboxyl transferase subunit alpha, chloroplastic (ACCase subunit alpha; Acetyl-CoA carboxylase carboxyltransferase subunit alpha)	na	ACCA_ARATH	Q9LD43	Q56YX0	CAC3	na	Arabidopsis thaliana (Mouse-ear cress)	3702
High	Master Protein	GLYMA_02G131500	K01969 - 3-methylcrotonyl-CoA carboxylase beta subunit (E6.4.1.4B) (1 of 2)	0	11.663	2	1	4	1	558	60.2	8.79	12.74	1	0	1.414	0.746272	28.46	82.9	117.1	10.21	28.58	High	High	Not Found	Peak Found	High	Not Found	1		2	2	Present Both	1	GLYMA_02G131500	GLYMA_02G131500	sp|Q9LDD8|MCCB_ARATH	Methylcrotonoyl-CoA carboxylase beta chain, mitochondrial GN=MCCB	ident:430/558 pos:485/558 query:558 hit:587 align:526 bit:890.2	OK	Methylcrotonoyl-CoA carboxylase beta chain, mitochondrial (MCCase subunit beta)	3-methylcrotonyl-CoA carboxylase 2; 3-methylcrotonyl-CoA:carbon dioxide ligase subunit beta	MCCB_ARATH	Q9LDD8	O49501; Q94F35	MCCB	na	Arabidopsis thaliana (Mouse-ear cress)	3702
High	Master Protein	GLYMA_12G232000	K02111 - F-type H+-transporting ATPase subunit alpha (ATPF1A, atpA) (1 of 2)	0	47.32	15	7	34	7	510	55.7	5.21	58.11	7	0	0.788	0.919239	36.24	133.2	66.8	44.63	61.64	High	High	High	High	High	High	1		3	3	Present Both	1	GLYMA_12G232000	GLYMA_12G232000	sp|P56757|ATPA_ARATH	ATP synthase subunit alpha, chloroplastic GN=atpA	ident:480/510 pos:492/510 query:510 hit:507 align:507 bit:966.5	OK	ATP synthase subunit alpha, chloroplastic	ATP synthase F1 sector subunit alpha; F-ATPase subunit alpha	ATPA_ARATH	P56757	na	atpA	na	Arabidopsis thaliana (Mouse-ear cress)	3702
High	Master Protein	GLYMA_10G267200	K02133 - F-type H+-transporting ATPase subunit beta (ATPeF1B, ATP5B, ATP2) (1 of 3)	0	745.701	71	35	368	6	559	59.8	6.15	1485.98	35	34	0.473	0.280499	14.03	150.9	49.1	28.01	68.34	High	High	High	High	High	High	1		3	3	Present Both	1	GLYMA_10G267200	GLYMA_10G267200	sp|Q9C5A9|ATPBO_ARATH	ATP synthase subunit beta-3, mitochondrial GN=ATG8C	ident:453/559 pos:491/559 query:559 hit:559 align:540 bit:906.7	OK	ATP synthase subunit beta-3, mitochondrial	na	ATPBO_ARATH	Q9C5A9	na	OrderedLocusNames=At5g08680	na	Arabidopsis thaliana (Mouse-ear cress)	3702
High	Master Protein	GLYMA_20G123600	K02133 - F-type H+-transporting ATPase subunit beta (ATPeF1B, ATP5B, ATP2) (1 of 3)	0	722.646	71	34	354	5	559	59.8	6.15	1442.13	34	0	0.513	0.382829	17.83	137.2	62.8	17.67	20.41	High	High	High	High	High	High	1		3	3	Present Both	1	GLYMA_20G123600	GLYMA_20G123600	sp|Q9C5A9|ATPBO_ARATH	ATP synthase subunit beta-3, mitochondrial GN=ATG8C	ident:451/559 pos:488/559 query:559 hit:559 align:524 bit:913.3	OK	ATP synthase subunit beta-3, mitochondrial	na	ATPBO_ARATH	Q9C5A9	na	OrderedLocusNames=At5g08680	na	Arabidopsis thaliana (Mouse-ear cress)	3702
High	Master Protein	GLYMA_07G117000	K02134 - F-type H+-transporting ATPase subunit delta (ATPeF1D, ATP5D, ATP16) (1 of 2)	0	330.269	81	16	133	11	197	20.8	7.58	573.78	16	0	0.786	0.919239	52.88	122.8	77.2	15.71	6.14	High	High	High	High	High	High	1		3	3	Present Both	1	GLYMA_07G117000	GLYMA_07G117000	sp|Q96252|ATP4_ARATH	ATP synthase subunit delta', mitochondrial GN=ATL75	ident:139/197 pos:161/197 query:197 hit:203 align:182 bit:292.7	OK	ATP synthase subunit delta', mitochondrial	F-ATPase delta' subunit	ATP4_ARATH	Q96252	na	OrderedLocusNames=At5g47030	na	Arabidopsis thaliana (Mouse-ear cress)	3702
High	Master Protein	GLYMA_03G105300	K02134 - F-type H+-transporting ATPase subunit delta (ATPeF1D, ATP5D, ATP16) (1 of 2)	0	303.146	81	16	119	11	197	20.8	7.58	533.74	16	7	0.789	0.919239	51.35	124.5	75.5	3.64	8.29	High	High	High	High	High	High	1		3	3	Present Both	1	GLYMA_03G105300	GLYMA_03G105300	sp|Q96252|ATP4_ARATH	ATP synthase subunit delta', mitochondrial GN=ATL75	ident:136/197 pos:162/197 query:197 hit:203 align:182 bit:290.4	OK	ATP synthase subunit delta', mitochondrial	F-ATPase delta' subunit	ATP4_ARATH	Q96252	na	OrderedLocusNames=At5g47030	na	Arabidopsis thaliana (Mouse-ear cress)	3702
High	Master Protein	GLYMA_07G003700	K02135 - F-type H+-transporting ATPase subunit epsilon (ATPeF1E, ATP5E, ATP15) (1 of 1)	0	25.868	26	2	17	2	70	7.9	8.91	43.16	2	0	1.151	0.928495	3.94	92.3	107.7	49.21	49.15	High	High	High	High	High	High	1		3	3	Present Both	1	GLYMA_07G003700	GLYMA_07G003700	sp|Q96253|ATP5E_ARATH	ATP synthase subunit epsilon, mitochondrial GN=BLI	ident:54/70 pos:64/70 query:70 hit:70 align:69 bit:125.6	OK	ATP synthase subunit epsilon, mitochondrial (ATPase subunit epsilon)	na	ATP5E_ARATH	Q96253	na	OrderedLocusNames=At1g51650	na	Arabidopsis thaliana (Mouse-ear cress)	3702
High	Master Protein	GLYMA_06G203200	K02136 - F-type H+-transporting ATPase subunit gamma (ATPeF1G, ATP5C1, ATP3) (1 of 2)	0	111.584	32	11	47	3	324	35.4	9.06	129.3	11	9	0.958	1	62.91	79.1	120.9	16.5	48.55	High	High	High	High	High	High	1		3	3	Present Both	1	GLYMA_06G203200	GLYMA_06G203200	sp|Q96250|ATPG3_ARATH	ATP synthase subunit gamma, mitochondrial GN=ATPC	ident:262/324 pos:288/324 query:324 hit:325 align:329 bit:528.9	OK	ATP synthase subunit gamma, mitochondrial	F-ATPase gamma subunit	ATPG3_ARATH	Q96250	Q7GB12	ATPC	na	Arabidopsis thaliana (Mouse-ear cress)	3702
High	Master Protein	GLYMA_15G273900	K02137 - F-type H+-transporting ATPase subunit O (ATPeF0O, ATP5O, ATP5) (1 of 2)	0	182.8	60	15	74	2	245	26.9	9.44	239.41	15	11	0.453	0.242728	14.63	130.7	69.3	26.52	37.21	High	High	High	High	Peak Found	High	1		3	3	Present Both	1	GLYMA_15G273900	GLYMA_15G273900	sp|Q96251|ATPO_ARATH	ATP synthase subunit O, mitochondrial GN=atpH	ident:135/245 pos:181/245 query:245 hit:238 align:243 bit:278.9	OK	ATP synthase subunit O, mitochondrial	Oligomycin sensitivity conferral protein (OSCP)	ATPO_ARATH	Q96251	Q93W68; Q9LYR1	OrderedLocusNames=At5g13450	na	Arabidopsis thaliana (Mouse-ear cress)	3702
High	Master Protein	GLYMA_08G155200	K02137 - F-type H+-transporting ATPase subunit O (ATPeF0O, ATP5O, ATP5) (1 of 2)	0	153.935	58	14	73	1	245	26.9	9.52	219.51	14	0	0.454	0.242757	13.67	145.3	54.7	39.73	70.69	High	High	High	High	High	High	1		3	3	Present Both	1	GLYMA_08G155200	GLYMA_08G155200	sp|Q96251|ATPO_ARATH	ATP synthase subunit O, mitochondrial GN=atpH	ident:132/245 pos:182/245 query:245 hit:238 align:243 bit:273.9	OK	ATP synthase subunit O, mitochondrial	Oligomycin sensitivity conferral protein (OSCP)	ATPO_ARATH	Q96251	Q93W68; Q9LYR1	OrderedLocusNames=At5g13450	na	Arabidopsis thaliana (Mouse-ear cress)	3702
High	Master Protein	GLYMA_10G213400	K02138 - F-type H+-transporting ATPase subunit d (ATPeF0D, ATP5H, ATP7) (1 of 2)	0	528.467	93	36	279	15	168	19.9	5.2	854.46	36	23	0.762	0.899245	42.58	135.3	64.7	53.55	42.67	High	High	High	High	High	High	1		3	3	Present Both	1	GLYMA_10G213400	GLYMA_10G213400	sp|Q9FT52|ATP5H_ARATH	ATP synthase subunit d, mitochondrial GN=ATL31	ident:139/168 pos:154/168 query:168 hit:168 align:168 bit:294.7	OK	ATP synthase subunit d, mitochondrial (ATPase subunit d)	na	ATP5H_ARATH	Q9FT52	Q8RW89; Q8W039	OrderedLocusNames=At3g52300	na	Arabidopsis thaliana (Mouse-ear cress)	3702
High	Master Protein	GLYMA_20G177700	K02138 - F-type H+-transporting ATPase subunit d (ATPeF0D, ATP5H, ATP7) (1 of 2)	0	478.366	93	33	279	12	168	19.9	5.29	864.13	33	0	0.991	0.999223	91.03	129.3	70.7	66.86	37.23	High	High	High	High	High	High	1		3	3	Present Both	1	GLYMA_20G177700	GLYMA_20G177700	sp|Q9FT52|ATP5H_ARATH	ATP synthase subunit d, mitochondrial GN=ATL31	ident:143/168 pos:157/168 query:168 hit:168 align:168 bit:301.6	OK	ATP synthase subunit d, mitochondrial (ATPase subunit d)	na	ATP5H_ARATH	Q9FT52	Q8RW89; Q8W039	OrderedLocusNames=At3g52300	na	Arabidopsis thaliana (Mouse-ear cress)	3702
High	Master Protein	GLYMA_05G223100	K02140 - F-type H+-transporting ATPase subunit g (ATPeFG, ATP5L, ATP20) (1 of 3)	0	3.944	10	2	5	2	122	14	8.9	0	2	0	1.056	0.976873	49.83	99.1	100.9	44.73	11.98	High	High	Peak Found	Peak Found	High	Peak Found	1		3	3	Present Both	1	GLYMA_05G223100	GLYMA_05G223100	sp|Q9LUB6|SNE_ARATH	F-box protein SNE GN=SNE	ident:17/122 pos:28/122 query:122 hit:157 align:56 bit:28.9	Partial_match_both	F-box protein SNE	Protein SNEEZY; Sleepy protein 2	SNE_ARATH	Q9LUB6	na	SNE	SLY2	Arabidopsis thaliana (Mouse-ear cress)	3702
High	Master Protein	GLYMA_16G142600	K02144 - V-type H+-transporting ATPase subunit H (ATPeV1H) (1 of 2)	0	48.035	11	5	27	5	448	51	6.93	65.97	5	0	1.336	0.818512	35.96	77.1	122.9	2.68	4.17	High	High	Peak Found	High	High	High	1	Acetyl [N-Term]	3	3	Present Both	1	GLYMA_16G142600	GLYMA_16G142600	sp|Q9LX65|VATH_ARATH	V-type proton ATPase subunit H GN=VHA-H	ident:351/448 pos:395/448 query:448 hit:441 align:451 bit:729.9	OK	V-type proton ATPase subunit H (V-ATPase subunit H)	Vacuolar H(+)-ATPase subunit H; Vacuolar proton pump subunit H	VATH_ARATH	Q9LX65	na	VHA-H	na	Arabidopsis thaliana (Mouse-ear cress)	3702
High	Master Protein	GLYMA_07G002300	K02145 - V-type H+-transporting ATPase subunit A (ATPeV1A, ATP6A) (1 of 2)	0	671.914	58	32	289	3	623	68.7	5.5	1103.6	32	0	0.738	0.877469	42.54	124.5	75.5	27.4	58.31	High	High	High	High	High	High	1		3	3	Present Both	1	GLYMA_07G002300	GLYMA_07G002300	sp|O23654|VATA_ARATH	V-type proton ATPase catalytic subunit A GN=VHA-A	ident:581/623 pos:599/623 query:623 hit:623 align:623 bit:1209.1	OK	V-type proton ATPase catalytic subunit A (V-ATPase subunit A)	V-ATPase 69 kDa subunit; Vacuolar H(+)-ATPase subunit A; Vacuolar proton pump subunit alpha	VATA_ARATH	O23654	na	VHA-A	na	Arabidopsis thaliana (Mouse-ear cress)	3702
High	Master Protein	GLYMA_08G224400	K02145 - V-type H+-transporting ATPase subunit A (ATPeV1A, ATP6A) (1 of 2)	0	646.682	58	34	278	5	623	68.7	5.67	1060.1	34	32	1.228	0.890417	62.78	93.2	106.8	0.94	13.49	High	High	High	High	High	High	1		3	3	Present Both	1	GLYMA_08G224400	GLYMA_08G224400	sp|O23654|VATA_ARATH	V-type proton ATPase catalytic subunit A GN=VHA-A	ident:580/623 pos:599/623 query:623 hit:623 align:623 bit:1208.4	OK	V-type proton ATPase catalytic subunit A (V-ATPase subunit A)	V-ATPase 69 kDa subunit; Vacuolar H(+)-ATPase subunit A; Vacuolar proton pump subunit alpha	VATA_ARATH	O23654	na	VHA-A	na	Arabidopsis thaliana (Mouse-ear cress)	3702
High	Master Protein	GLYMA_09G245700	K02147 - V-type H+-transporting ATPase subunit B (ATPeV1B, ATP6B) (1 of 4)	0	548.448	69	33	221	2	489	54.1	5.06	794.62	33	31	1.43	0.72903	63.17	83.2	116.8	10.7	12.55	High	High	Peak Found	High	Not Found	High	1		3	2	Present Both	1	GLYMA_09G245700	GLYMA_09G245700	sp|Q9SZN1|VATB2_ARATH	V-type proton ATPase subunit B2 GN=VHA-B2	ident:470/489 pos:479/489 query:489 hit:487 align:489 bit:954.1	OK	V-type proton ATPase subunit B2 (V-ATPase subunit B2)	Vacuolar H(+)-ATPase subunit B isoform 2; Vacuolar proton pump subunit B2	VATB2_ARATH	Q9SZN1	B9DGU0; B9DHP3; Q56W88; Q94AY7	VHA-B2	na	Arabidopsis thaliana (Mouse-ear cress)	3702
High	Master Protein	GLYMA_19G101000	K02148 - V-type H+-transporting ATPase subunit C (ATPeV1C, ATP6C) (1 of 4)	0	111.802	48	14	62	3	377	42.8	6.09	208.52	14	9	0.618	0.662211	24.27	121.5	78.5	56.03	60.58	High	High	High	High	High	High	1		3	3	Present Both	1	GLYMA_19G101000	GLYMA_19G101000	sp|Q9SDS7|VATC_ARATH	V-type proton ATPase subunit C GN=VHA-C	ident:316/377 pos:347/377 query:377 hit:375 align:377 bit:659.4	OK	V-type proton ATPase subunit C (V-ATPase subunit C)	Vacuolar H(+)-ATPase subunit C; Vacuolar proton pump subunit C	VATC_ARATH	Q9SDS7	na	VHA-C	DET3; VATC	Arabidopsis thaliana (Mouse-ear cress)	3702
High	Master Protein	GLYMA_16G050200	K02148 - V-type H+-transporting ATPase subunit C (ATPeV1C, ATP6C) (1 of 4)	0	100.127	43	13	58	3	384	43.7	6.15	177.48	13	0	0.671	0.797388	18.3	129.4	70.6	31	80.45	High	High	High	High	High	High	1		3	3	Present Both	1	GLYMA_16G050200	GLYMA_16G050200	sp|Q9SDS7|VATC_ARATH	V-type proton ATPase subunit C GN=VHA-C	ident:310/384 pos:344/384 query:384 hit:375 align:376 bit:656.8	OK	V-type proton ATPase subunit C (V-ATPase subunit C)	Vacuolar H(+)-ATPase subunit C; Vacuolar proton pump subunit C	VATC_ARATH	Q9SDS7	na	VHA-C	DET3; VATC	Arabidopsis thaliana (Mouse-ear cress)	3702
High	Master Protein	GLYMA_02G065500	K02148 - V-type H+-transporting ATPase subunit C (ATPeV1C, ATP6C) (1 of 4)	0	85.159	38	13	50	3	375	42.5	5.95	138.02	13	3	0.883	0.979858	36.76	123.7	76.3	83.89	58.63	High	Not Found	Not Found	High	High	High	1		1	3	Only Sample	1	GLYMA_02G065500	GLYMA_02G065500	sp|Q9SDS7|VATC_ARATH	V-type proton ATPase subunit C GN=VHA-C	ident:305/375 pos:344/375 query:375 hit:375 align:374 bit:654.1	OK	V-type proton ATPase subunit C (V-ATPase subunit C)	Vacuolar H(+)-ATPase subunit C; Vacuolar proton pump subunit C	VATC_ARATH	Q9SDS7	na	VHA-C	DET3; VATC	Arabidopsis thaliana (Mouse-ear cress)	3702
High	Master Protein	GLYMA_16G146600	K02148 - V-type H+-transporting ATPase subunit C (ATPeV1C, ATP6C) (1 of 4)	0	73.98	34	11	51	2	375	42.5	5.41	145.73	11	0	0.672	0.799881	18.81	123.6	76.4	22.49	58.08	High	High	High	High	High	High	1		3	3	Present Both	1	GLYMA_16G146600	GLYMA_16G146600	sp|Q9SDS7|VATC_ARATH	V-type proton ATPase subunit C GN=VHA-C	ident:305/375 pos:346/375 query:375 hit:375 align:374 bit:656.0	OK	V-type proton ATPase subunit C (V-ATPase subunit C)	Vacuolar H(+)-ATPase subunit C; Vacuolar proton pump subunit C	VATC_ARATH	Q9SDS7	na	VHA-C	DET3; VATC	Arabidopsis thaliana (Mouse-ear cress)	3702
High	Master Protein	GLYMA_08G218500	K02149 - V-type H+-transporting ATPase subunit D (ATPeV1D, ATP6M) (1 of 2)	0	148.393	66	17	78	3	258	28.9	9.57	197.22	17	15	1.357	0.806443	46.82	93.7	106.3	34.04	21.49	High	High	Not Found	High	High	High	1		2	3	Present Both	1	GLYMA_08G218500	GLYMA_08G218500	sp|Q9XGM1|VATD_ARATH	V-type proton ATPase subunit D GN=VHA-D	ident:205/258 pos:233/258 query:258 hit:261 align:269 bit:409.1	OK	V-type proton ATPase subunit D (V-ATPase subunit D)	Vacuolar H(+)-ATPase subunit D; Vacuolar proton pump subunit D	VATD_ARATH	Q9XGM1	Q9LXS8	VHA-D	VATD; VATPD	Arabidopsis thaliana (Mouse-ear cress)	3702
High	Master Protein	GLYMA_07G023400	K02149 - V-type H+-transporting ATPase subunit D (ATPeV1D, ATP6M) (1 of 2)	0	121.26	53	15	67	1	258	28.9	9.61	156.97	15	0	1.047	0.976873	33.42	97.7	102.3	20	31.73	High	Peak Found	Peak Found	Peak Found	High	Peak Found	1		3	3	Present Both	1	GLYMA_07G023400	GLYMA_07G023400	sp|Q9XGM1|VATD_ARATH	V-type proton ATPase subunit D GN=VHA-D	ident:203/258 pos:230/258 query:258 hit:261 align:262 bit:409.1	OK	V-type proton ATPase subunit D (V-ATPase subunit D)	Vacuolar H(+)-ATPase subunit D; Vacuolar proton pump subunit D	VATD_ARATH	Q9XGM1	Q9LXS8	VHA-D	VATD; VATPD	Arabidopsis thaliana (Mouse-ear cress)	3702
High	Master Protein	GLYMA_05G213800	K02150 - V-type H+-transporting ATPase subunit E (ATPeV1E, ATP6E) (1 of 7)	0	302.858	61	22	131	1	232	26.7	6.44	416.35	22	24	1.022	0.986581	83.17	118.4	81.6	61.56	41.16	High	High	Peak Found	Not Found	High	Not Found	1	Acetyl [N-Term]	3	1	Only Control	1	GLYMA_05G213800	GLYMA_05G213800	sp|Q39258|VATE1_ARATH	V-type proton ATPase subunit E1 GN=VHA-E1	ident:174/232 pos:203/232 query:232 hit:230 align:232 bit:355.5	OK	V-type proton ATPase subunit E1 (V-ATPase subunit E1)	Protein EMBRYO DEFECTIVE 2448; Vacuolar H(+)-ATPase subunit E isoform 1; Vacuolar proton pump subunit E1	VATE1_ARATH	Q39258	O82502	VHA-E1	EMB2448; TUF; TUFF; VATE	Arabidopsis thaliana (Mouse-ear cress)	3702
High	Master Protein	GLYMA_08G020300	K02150 - V-type H+-transporting ATPase subunit E (ATPeV1E, ATP6E) (1 of 7)	0	268.145	50	18	115	1	232	26.8	6.25	374.55	18	0	0.734	0.870366	60.98	153.8	46.2	60.11	121.79	High	Peak Found	Peak Found	High	High	High	1	Acetyl [N-Term]	3	3	Present Both	1	GLYMA_08G020300	GLYMA_08G020300	sp|Q39258|VATE1_ARATH	V-type proton ATPase subunit E1 GN=VHA-E1	ident:175/232 pos:202/232 query:232 hit:230 align:232 bit:355.5	OK	V-type proton ATPase subunit E1 (V-ATPase subunit E1)	Protein EMBRYO DEFECTIVE 2448; Vacuolar H(+)-ATPase subunit E isoform 1; Vacuolar proton pump subunit E1	VATE1_ARATH	Q39258	O82502	VHA-E1	EMB2448; TUF; TUFF; VATE	Arabidopsis thaliana (Mouse-ear cress)	3702
High	Master Protein	GLYMA_05G214200	K02150 - V-type H+-transporting ATPase subunit E (ATPeV1E, ATP6E) (1 of 7)	0	214.841	41	18	102	2	239	27.6	6.8	287.62	18	0	0.82	0.943109	10.35	124.1	75.9	55.41	49.92	High	High	Peak Found	High	High	High	1	Acetyl [N-Term]	3	3	Present Both	1	GLYMA_05G214200	GLYMA_05G214200	sp|P0CAN7|VATE3_ARATH	V-type proton ATPase subunit E3 GN=VHA-E3	ident:175/239 pos:208/239 query:239 hit:237 align:237 bit:360.9	OK	V-type proton ATPase subunit E3 (V-ATPase subunit E3)	Vacuolar H(+)-ATPase subunit E isoform 3; Vacuolar proton pump subunit E3	VATE3_ARATH	P0CAN7	Q9SH70	VHA-E3	na	Arabidopsis thaliana (Mouse-ear cress)	3702
High	Master Protein	GLYMA_05G135300.2.p	K02151 - V-type H+-transporting ATPase subunit F (ATPeV1F, ATP6S14) (1 of 2)	0	267.199	97	15	124	15	130	14.5	6.57	444.51	15	0	0.953	0.999223	41.47	96.7	103.3	6.41	10.96	High	High	High	High	High	High	1		3	3	Present Both	1	GLYMA_05G135300.2.p	GLYMA_05G135300.2.p	sp|Q9ZQX4|VATF_ARATH	V-type proton ATPase subunit F GN=VHA-F	ident:109/130 pos:119/130 query:130 hit:128 align:126 bit:231.9	OK	V-type proton ATPase subunit F (V-ATPase subunit F)	V-ATPase 14 kDa subunit; Vacuolar H(+)-ATPase subunit F; Vacuolar proton pump subunit F	VATF_ARATH	Q9ZQX4	na	VHA-F	VATF	Arabidopsis thaliana (Mouse-ear cress)	3702
High	Master Protein	GLYMA_13G139900.2.p	K02152 - V-type H+-transporting ATPase subunit G (ATPeV1G, ATP6G) (1 of 4)	0	343.403	85	16	187	2	110	12.2	6.58	716.66	16	5	1.339	0.816281	96.9	84.8	115.2	15.16	13.18	High	High	High	High	Peak Found	High	1		3	3	Present Both	1	GLYMA_13G139900.2.p	GLYMA_13G139900.2.p	sp|O82628|VATG1_ARATH	V-type proton ATPase subunit G1 GN=VHA-G1	ident:82/110 pos:95/110 query:110 hit:110 align:110 bit:139.8	OK	V-type proton ATPase subunit G1 (V-ATPase subunit G1)	Vacuolar H(+)-ATPase subunit G isoform 1; Vacuolar proton pump subunit G1	VATG1_ARATH	O82628	na	VHA-G1	AVMA10; VAG1; VATG1; VMA10	Arabidopsis thaliana (Mouse-ear cress)	3702
High	Master Protein	GLYMA_10G052700	K02152 - V-type H+-transporting ATPase subunit G (ATPeV1G, ATP6G) (1 of 4)	0	338.807	85	17	201	8	110	12.2	7.42	784.78	17	10	1.09	0.958587	70.71	99.6	100.4	20.82	2.28	High	High	High	High	High	High	1		3	3	Present Both	1	GLYMA_10G052700	GLYMA_10G052700	sp|O82628|VATG1_ARATH	V-type proton ATPase subunit G1 GN=VHA-G1	ident:83/110 pos:96/110 query:110 hit:110 align:110 bit:144.8	OK	V-type proton ATPase subunit G1 (V-ATPase subunit G1)	Vacuolar H(+)-ATPase subunit G isoform 1; Vacuolar proton pump subunit G1	VATG1_ARATH	O82628	na	VHA-G1	AVMA10; VAG1; VATG1; VMA10	Arabidopsis thaliana (Mouse-ear cress)	3702
High	Master Protein	GLYMA_03G180700	K02152 - V-type H+-transporting ATPase subunit G (ATPeV1G, ATP6G) (1 of 4)	0	236.884	80	13	125	5	110	12.3	7.5	508.37	13	0	0.939	0.999223	44.33	107.7	92.3	30.65	24.69	High	High	High	High	High	High	1		3	3	Present Both	1	GLYMA_03G180700	GLYMA_03G180700	sp|O82628|VATG1_ARATH	V-type proton ATPase subunit G1 GN=VHA-G1	ident:84/110 pos:94/110 query:110 hit:110 align:110 bit:142.5	OK	V-type proton ATPase subunit G1 (V-ATPase subunit G1)	Vacuolar H(+)-ATPase subunit G isoform 1; Vacuolar proton pump subunit G1	VATG1_ARATH	O82628	na	VHA-G1	AVMA10; VAG1; VATG1; VMA10	Arabidopsis thaliana (Mouse-ear cress)	3702
High	Master Protein	GLYMA_06G027600	K02154 - V-type H+-transporting ATPase subunit a (ATPeV0A, ATP6N) (1 of 7)	0	87.841	5	4	25	2	815	93.2	6.61	86.89	4	0	100	9.48889e-17			200		11.4	High	Not Found	Peak Found	High	High	High	1		2	3	Present Both	1	GLYMA_06G027600	GLYMA_06G027600	sp|Q8W4S4|VHAA3_ARATH	V-type proton ATPase subunit a3 GN=VHA-a3	ident:602/815 pos:707/815 query:815 hit:821 align:808 bit:1253.4	OK	V-type proton ATPase subunit a3 (V-ATPase subunit a3)	V-type proton ATPase 95 kDa subunit a isoform 3 (V-ATPase 95 kDa isoform a3); Vacuolar H(+)-ATPase subunit a isoform 3; Vacuolar proton pump subunit a3; Vacuolar proton translocating ATPase 95 kDa subunit a isoform 3	VHAA3_ARATH	Q8W4S4	Q0WLI9; Q42216; Q56WQ9; Q9SVI5	VHA-a3	na	Arabidopsis thaliana (Mouse-ear cress)	3702
High	Master Protein	GLYMA_12G082300.2.p	K02219 - cyclin-dependent kinase regulatory subunit CKS1 (CKS1) (1 of 3)	0	6.475	20	2	7	2	88	10.6	9.09	9.4	2	0	0.791	0.92137	18.69	119	81	20.29	12.34	High	High	High	High	High	High	1		3	3	Present Both	1	GLYMA_12G082300.2.p	GLYMA_12G082300.2.p	sp|O23249|CKS1_ARATH	Cyclin-dependent kinases regulatory subunit 1 GN=CKS1	ident:84/88 pos:87/88 query:88 hit:87 align:88 bit:174.1	OK	Cyclin-dependent kinases regulatory subunit 1	CKS1-At	CKS1_ARATH	O23249	na	CKS1	na	Arabidopsis thaliana (Mouse-ear cress)	3702
High	Master Protein	GLYMA_07G032800	K02265 - cytochrome c oxidase subunit 5b (COX5B) (1 of 3)	0	44.276	20	3	13	3	162	17.7	5.38	43.89	3	0	1.746	0.419363	67.43	85.5	114.5	3.95	106.4	High	High	Peak Found	High	High	High	1		3	3	Present Both	1	GLYMA_07G032800	GLYMA_07G032800	sp|Q9SSB8|CX5B2_ARATH	Cytochrome c oxidase subunit 5b-2, mitochondrial GN=COX5B-2	ident:97/162 pos:115/162 query:162 hit:171 align:157 bit:185.3	OK	Cytochrome c oxidase subunit 5b-2, mitochondrial (AtCOX5b-2)	na	CX5B2_ARATH	Q9SSB8	Q8LBW7	COX5B-2	na	Arabidopsis thaliana (Mouse-ear cress)	3702
High	Master Protein	GLYMA_02G208900	K02267 - cytochrome c oxidase subunit 6b (COX6B) (1 of 5)	0	27.597	30	5	18	2	174	19.4	4.42	48.17	5	0	1.555	0.586308	6.35	78.3	121.7	6.05		High	High	Not Found	Not Found	High	Not Found	1		2	1	Only Control	1	GLYMA_02G208900	GLYMA_02G208900	sp|Q9S7L9|CX6B1_ARATH	Cytochrome c oxidase subunit 6b-1 GN=COX6B-1	ident:113/174 pos:129/174 query:174 hit:191 align:182 bit:184.1	OK	Cytochrome c oxidase subunit 6b-1 (AtCOX6b-1)	na	CX6B1_ARATH	Q9S7L9	Q8LCP1	COX6B-1	na	Arabidopsis thaliana (Mouse-ear cress)	3702
High	Master Protein	GLYMA_13G090900	K02267 - cytochrome c oxidase subunit 6b (COX6B) (1 of 5)	0	27.595	45	5	37	4	77	9.1	7.21	64.54	5	0	1.142	0.934958	25.71	96	104	55.05	34.22	High	High	High	High	High	High	1		3	3	Present Both	1	GLYMA_13G090900	GLYMA_13G090900	sp|Q945L0|CX6B2_ARATH	Cytochrome c oxidase subunit 6b-2 GN=COX6B-2	ident:67/77 pos:71/77 query:77 hit:78 align:75 bit:147.5	OK	Cytochrome c oxidase subunit 6b-2 (AtCOX6b-2)	na	CX6B2_ARATH	Q945L0	Q8LD51	COX6B-2	na	Arabidopsis thaliana (Mouse-ear cress)	3702
High	Master Protein	GLYMA_05G041900.2.p	K02358 - elongation factor Tu (tuf, TUFM) (1 of 8)	0	49.082	14	4	11	4	479	52.5	6.81	33.18	4	0	0.61	0.639662	18.48	79.8	120.2	16.49	32.55	High	High	High	High	High	High	1		3	3	Present Both	1	GLYMA_05G041900.2.p	GLYMA_05G041900.2.p	sp|P17745|EFTU_ARATH	Elongation factor Tu, chloroplastic GN=TUFA	ident:388/479 pos:424/479 query:479 hit:476 align:460 bit:775.0	OK	Elongation factor Tu, chloroplastic (EF-Tu)	Ras-related protein RABE1b (AtRABE1b); Ras-related protein Rab8D (AtRab8D)	EFTU_ARATH	P17745	Q8GTE7	TUFA	RAB8D; RABE1B	Arabidopsis thaliana (Mouse-ear cress)	3702
High	Master Protein	GLYMA_18G141900	K02575 - MFS transporter, NNP family, nitrate/nitrite transporter (NRT, narK, nrtP, nasA) (1 of 5)	0	39.873	3	2	12	2	510	55.5	9.2	43.57	2	0	2.23	0.151001	12.47	55.6	144.4	18.69	1.37	High	High	High	High	Not Found	High	1		3	2	Present Both	1	GLYMA_18G141900	GLYMA_18G141900	sp|Q9LPV5|NRT25_ARATH	High affinity nitrate transporter 2.5 GN=NRT2.5	ident:365/510 pos:420/510 query:510 hit:502 align:484 bit:771.2	OK	High affinity nitrate transporter 2.5 (AtNRT2:5)	na	NRT25_ARATH	Q9LPV5	na	NRT2.5	na	Arabidopsis thaliana (Mouse-ear cress)	3702
High	Master Protein	GLYMA_10G249000	K02692 - photosystem I subunit II (psaD) (1 of 2)	0	49.626	42	7	8	7	210	23	9.61	18.52	7	0	0.462	0.262011	21.21	136.2	63.8	143.09	15.02	High	High	High	Peak Found	Peak Found	Peak Found	1		3	3	Present Both	1	GLYMA_10G249000	GLYMA_10G249000	sp|Q9SA56|PSAD2_ARATH	Photosystem I reaction center subunit II-2, chloroplastic GN=PSAD2	ident:156/210 pos:174/210 query:210 hit:204 align:210 bit:306.2	OK	Photosystem I reaction center subunit II-2, chloroplastic	Photosystem I 20 kDa subunit 2 (PSI-D2)	PSAD2_ARATH	Q9SA56	Q9SUI3	PSAD2	na	Arabidopsis thaliana (Mouse-ear cress)	3702
High	Master Protein	GLYMA_01G180800	K02716 - photosystem II oxygen-evolving enhancer protein 1 (psbO) (1 of 4)	0	205.828	49	22	59	4	329	34.8	6.77	151.88	22	4	0.176	7.31482e-05	3.93	156.2	43.8	153.57	83.67	High	Peak Found	High	Peak Found	High	Peak Found	1		3	3	Present Both	1	GLYMA_01G180800	GLYMA_01G180800	sp|Q9S841|PSBO2_ARATH	Oxygen-evolving enhancer protein 1-2, chloroplastic GN=PSBO2	ident:259/329 pos:295/329 query:329 hit:331 align:331 bit:535.4	OK	Oxygen-evolving enhancer protein 1-2, chloroplastic (OEE1)	33 kDa subunit of oxygen evolving system of photosystem II; 33 kDa thylakoid membrane protein; Manganese-stabilizing protein 2 (MSP-2); OEC 33 kDa subunit	PSBO2_ARATH	Q9S841	na	PSBO2	na	Arabidopsis thaliana (Mouse-ear cress)	3702
High	Master Protein	GLYMA_14G073000	K02725 - 20S proteasome subunit alpha 6 (PSMA1) (1 of 3)	0	17.63	13	3	6	3	288	31.1	5.27	13.09	3	0	0.995	0.999223	72.28	83.6	116.4	7.7	17.49	High	Peak Found	High	High	Peak Found	High	1		3	3	Present Both	1	GLYMA_14G073000	GLYMA_14G073000	sp|P34066|PSA1A_ARATH	Proteasome subunit alpha type-1-A GN=PAF1	ident:206/288 pos:225/288 query:288 hit:278 align:238 bit:444.1	OK	Proteasome subunit alpha type-1-A	20S proteasome alpha subunit F-1; Proteasome 30 kDa subunit; Proteasome component 2A (AtPSM30); Proteasome subunit alpha type-6; Protein ARSENIC TOLERANCE 5	PSA1A_ARATH	P34066	O81150; Q8LF69	PAF1	ARS5; PRC2A; PRS1; PSM30	Arabidopsis thaliana (Mouse-ear cress)	3702
High	Master Protein	GLYMA_08G167600	K02726 - 20S proteasome subunit alpha 2 (PSMA2) (1 of 4)	0	33.657	34	5	9	1	235	25.6	5.68	26.68	5	0	0.814	0.940144	7.58	110.3	89.7	8.79	11.58	High	Peak Found	Not Found	High	Not Found	High	1		2	2	Present Both	1	GLYMA_08G167600	GLYMA_08G167600	sp|O23708|PSA2A_ARATH	Proteasome subunit alpha type-2-A GN=PAB1	ident:222/235 pos:227/235 query:235 hit:235 align:235 bit:453.8	OK	Proteasome subunit alpha type-2-A	20S proteasome alpha subunit B-1; Proteasome component 3	PSA2A_ARATH	O23708	B9DGA9; Q94EI0	PAB1	PRC3	Arabidopsis thaliana (Mouse-ear cress)	3702
Medium	Master Protein	GLYMA_05G079000	K02727 - 20S proteasome subunit alpha 7 (PSMA3) (1 of 2)	0.011	1.821	3	1	1	1	261	28.7	7.03	0	1	0	1.263	0.870366	67.41	80.9	119.1	59.96	25.44	High	Peak Found	Peak Found	Peak Found	Peak Found	Peak Found	1		3	3	Present Both	1	GLYMA_05G079000	GLYMA_05G079000	sp|O23715|PSA3_ARATH	Proteasome subunit alpha type-3 GN=PAG1	ident:198/261 pos:220/261 query:261 hit:249 align:227 bit:429.5	OK	Proteasome subunit alpha type-3	20S proteasome alpha subunit G-1; DiDi 17A-2a; Proteasome component 8; Proteasome subunit alpha type-7	PSA3_ARATH	O23715	O81151; Q680B8; Q9M3S3	PAG1	PRC8	Arabidopsis thaliana (Mouse-ear cress)	3702
High	Master Protein	GLYMA_02G013600	K02729 - 20S proteasome subunit alpha 5 (PSMA5) (1 of 4)	0	28.781	26	5	14	5	237	26	4.75	35.61	5	0	0.89	0.983811	58.61	120.4	79.6	25.49	45.39	High	High	Peak Found	High	High	High	1		3	3	Present Both	1	GLYMA_02G013600	GLYMA_02G013600	sp|Q42134|PSA5B_ARATH	Proteasome subunit alpha type-5-B GN=PAE2	ident:230/237 pos:235/237 query:237 hit:237 align:237 bit:480.3	OK	Proteasome subunit alpha type-5-B	20S proteasome alpha subunit E-2; Proteasome component Z	PSA5B_ARATH	Q42134	na	PAE2	PRCZ	Arabidopsis thaliana (Mouse-ear cress)	3702
High	Master Protein	GLYMA_02G046400	K02731 - 20S proteasome subunit alpha 4 (PSMA7) (1 of 3)	0	54.72	24	5	24	5	249	27.1	7.49	67.24	5	0	0.684	0.815367	32.22	130.4	69.6	27.1	34.55	High	High	High	High	High	High	1		3	3	Present Both	1	GLYMA_02G046400	GLYMA_02G046400	sp|O24616|PSA7B_ARATH	Proteasome subunit alpha type-7-B GN=PAD2	ident:230/249 pos:240/249 query:249 hit:250 align:250 bit:443.4	OK	Proteasome subunit alpha type-7-B	20S proteasome alpha subunit D-2; Proteasome component 6B; Proteasome component 6C; Proteasome subunit alpha type-4	PSA7B_ARATH	O24616	Q0WTK1; Q84W05	PAD2	PRC6B; PRC6C; PRS1	Arabidopsis thaliana (Mouse-ear cress)	3702
High	Master Protein	GLYMA_08G286200	K02732 - 20S proteasome subunit beta 6 (PSMB1) (1 of 2)	0	25.685	25	3	5	3	223	24.5	6.67	15.29	3	0	1.122	0.940583	72.67	104.6	95.4	51.24	37.83	High	High	Peak Found	High	Peak Found	High	1		3	3	Present Both	1	GLYMA_08G286200	GLYMA_08G286200	sp|P42742|PSB1_ARATH	Proteasome subunit beta type-1 GN=PBF1	ident:196/223 pos:211/223 query:223 hit:223 align:223 bit:419.9	OK	Proteasome subunit beta type-1	20S proteasome beta subunit F-1; Proteasome component 5; Proteasome subunit beta type-6; TAS-F22/FAFP98; TAS-G39.20	PSB1_ARATH	P42742	P42741; Q570C3; Q6LAD2; Q9SBI6	PBF1	PRC5	Arabidopsis thaliana (Mouse-ear cress)	3702
High	Master Protein	GLYMA_04G194700.3.p	K02737 - 20S proteasome subunit beta 5 (PSMB5) (1 of 2)	0.006	2.076	5	1	2	1	272	29.3	6.14	0	1	0	0.8	0.932027	34.37	129.1	70.9	56.36	26.29	High	High	Peak Found	Peak Found	Peak Found	Peak Found	1		3	3	Present Both	1	GLYMA_04G194700.3.p	GLYMA_04G194700.3.p	sp|Q9LIP2|PSB5B_ARATH	Proteasome subunit beta type-5-B GN=PBE2	ident:225/272 pos:244/272 query:272 hit:273 align:271 bit:465.7	OK	Proteasome subunit beta type-5-B	20S proteasome beta subunit E-2; Proteasome epsilon-2 chain	PSB5B_ARATH	Q9LIP2	na	PBE2	na	Arabidopsis thaliana (Mouse-ear cress)	3702
High	Master Protein	GLYMA_04G077400	K02738 - 20S proteasome subunit beta 1 (PSMB6) (1 of 2)	0	16.993	15	3	7	3	233	25.1	5.36	18.7	3	0	0.752	0.893039	28.16	107.5	92.5	47.83	2.88	High	High	Peak Found	High	High	High	1		3	3	Present Both	1	GLYMA_04G077400	GLYMA_04G077400	sp|Q8LD27|PSB6_ARATH	Proteasome subunit beta type-6 GN=PBA1	ident:204/233 pos:221/233 query:233 hit:233 align:235 bit:422.9	OK	Proteasome subunit beta type-6	20S proteasome beta subunit A-1; Proteasome component D; Proteasome subunit beta type-1	PSB6_ARATH	Q8LD27	O23716	PBA1	PRCD	Arabidopsis thaliana (Mouse-ear cress)	3702
High	Master Protein	GLYMA_09G228500	K03008 - DNA-directed RNA polymerase II subunit RPB11 (RPB11, POLR2J) (1 of 3)	0	14.269	25	2	8	2	116	13.6	7.64	11.9	2	0	0.63	0.697386	35.28	104.8	95.2	74.75	3.07	High	High	High	High	Not Found	High	1		3	2	Present Both	1	GLYMA_09G228500	GLYMA_09G228500	sp|Q38859|NRPBB_ARATH	DNA-directed RNA polymerases II, IV and V subunit 11 GN=NRPB11	ident:98/116 pos:111/116 query:116 hit:116 align:116 bit:213.4	OK	DNA-directed RNA polymerases II, IV and V subunit 11	DNA-directed RNA polymerase II 13.6 kDa polypeptide; DNA-directed RNA polymerase II subunit J; DNA-directed RNA polymerase II subunit RPB11 (RNA polymerase II subunit B11)	NRPBB_ARATH	Q38859	na	NRPB11	NRPD11; NRPE11; RPB13.6	Arabidopsis thaliana (Mouse-ear cress)	3702
High	Master Protein	GLYMA_07G084000	K03013 - DNA-directed RNA polymerases I, II, and III subunit RPABC1 (RPB5, POLR2E) (1 of 5)	0	3.661	11	2	3	2	206	24.2	9.25	1.89	2	0	0.964	0.999223	77.16	137.9	62.1	58.03	52.78	High	High	Peak Found	High	Peak Found	Peak Found	1		3	3	Present Both	1	GLYMA_07G084000	GLYMA_07G084000	sp|O81098|RPB5A_ARATH	DNA-directed RNA polymerases II and IV subunit 5A GN=NRPB5A	ident:161/206 pos:186/206 query:206 hit:205 align:205 bit:342.4	OK	DNA-directed RNA polymerases II and IV subunit 5A (RPB5a)	DNA-directed RNA polymerase II subunit E; RNA polymerase I, II and III 24.3 kDa subunit (AtRPB24.3)	RPB5A_ARATH	O81098	na	NRPB5A	NRPD5A; RPABC24.3	Arabidopsis thaliana (Mouse-ear cress)	3702
High	Master Protein	GLYMA_19G045500	K03020 - DNA-directed RNA polymerases I and III subunit RPAC2 (RPC19, POLR1D) (1 of 2)	0	10.413	24	2	7	2	106	12.1	5.21	12.1	2	0	0.941	0.999223	47.37	103.8	96.2	23.66	28.07	High	Peak Found	High	Peak Found	High	High	1		3	3	Present Both	1	GLYMA_19G045500	GLYMA_19G045500	sp|Q38859|NRPBB_ARATH	DNA-directed RNA polymerases II, IV and V subunit 11 GN=NRPB11	ident:24/106 pos:43/106 query:106 hit:116 align:82 bit:52.4	Poor_match	DNA-directed RNA polymerases II, IV and V subunit 11	DNA-directed RNA polymerase II 13.6 kDa polypeptide; DNA-directed RNA polymerase II subunit J; DNA-directed RNA polymerase II subunit RPB11 (RNA polymerase II subunit B11)	NRPBB_ARATH	Q38859	na	NRPB11	NRPD11; NRPE11; RPB13.6	Arabidopsis thaliana (Mouse-ear cress)	3702
High	Master Protein	GLYMA_10G234800	K03023 - DNA-directed RNA polymerase III subunit RPC3 (RPC3, POLR3C) (1 of 3)	0.001	2.703	2	1	20	1	518	59.3	8.03	37.23	1	0	0.52	0.402966	2.49	133.6	66.4	3.83	53.79	High	High	High	High	High	High	1		3	3	Present Both	1	GLYMA_10G234800	GLYMA_10G234800	sp|Q9M302|PP270_ARATH	Pentatricopeptide repeat-containing protein At3g48810 GN=PCMP-H76	ident:53/518 pos:88/518 query:518 hit:659 align:206 bit:33.5	Partial_match_both	Pentatricopeptide repeat-containing protein At3g48810	na	PP270_ARATH	Q9M302	na	OrderedLocusNames=At3g48810	na	Arabidopsis thaliana (Mouse-ear cress)	3702
High	Master Protein	GLYMA_12G117600	K03028 - 26S proteasome regulatory subunit N1 (PSMD2, RPN1) (1 of 2)	0	60.156	11	7	16	7	885	97.2	5.24	51.39	7	0	1.386	0.779003	51.67	64.6	135.4	24.47	43.31	High	High	High	High	High	High	1		3	3	Present Both	1	GLYMA_12G117600	GLYMA_12G117600	sp|Q9SIV2|PSD2A_ARATH	26S proteasome non-ATPase regulatory subunit 2 homolog A GN=RPN1A	ident:748/885 pos:832/885 query:885 hit:891 align:896 bit:1516.9	OK	26S proteasome non-ATPase regulatory subunit 2 homolog A	26S proteasome regulatory subunit RPN1a (AtRPN1a); 26S proteasome regulatory subunit S2 homolog A	PSD2A_ARATH	Q9SIV2	Q56ZR0; Q9C5J1	RPN1A	na	Arabidopsis thaliana (Mouse-ear cress)	3702
High	Master Protein	GLYMA_14G081600	K03030 - 26S proteasome regulatory subunit N11 (PSMD14, RPN11, POH1) (1 of 4)	0	46.338	34	7	11	7	316	35.2	6.6	32.56	7	0	0.578	0.555129	27.57	107.4	92.6	29.17	65.2	High	Peak Found	Peak Found	High	High	High	1		3	3	Present Both	1	GLYMA_14G081600	GLYMA_14G081600	sp|Q9LT08|PSDE_ARATH	26S proteasome non-ATPase regulatory subunit 14 homolog GN=RPN11	ident:293/316 pos:297/316 query:316 hit:308 align:306 bit:607.4	OK	26S proteasome non-ATPase regulatory subunit 14 homolog	26S proteasome regulatory subunit RPN11 (AtRPN11)	PSDE_ARATH	Q9LT08	Q0WQQ6; Q8LD11	RPN11	na	Arabidopsis thaliana (Mouse-ear cress)	3702
High	Master Protein	GLYMA_08G048800	K03032 - 26S proteasome regulatory subunit N2 (PSMD1, RPN2) (1 of 2)	0	66.984	6	5	27	4	1006	109.5	5.36	62.92	5	1	2.088	0.210495	77.99	29.4	170.6	57.91	63.7	High	High	High	High	High	High	1		3	3	Present Both	1	GLYMA_08G048800	GLYMA_08G048800	sp|O48844|PSD1A_ARATH	26S proteasome non-ATPase regulatory subunit 1 homolog A GN=RPN2A	ident:860/1006 pos:913/1006 query:1006 hit:1004 align:1009 bit:1703.0	OK	26S proteasome non-ATPase regulatory subunit 1 homolog A	26S proteasome regulatory subunit RPN2a (AtRPN2a); 26S proteasome regulatory subunit S1 homolog A	PSD1A_ARATH	O48844	Q570D7; Q6XJG7	RPN2A	na	Arabidopsis thaliana (Mouse-ear cress)	3702
High	Master Protein	GLYMA_05G241500	K03032 - 26S proteasome regulatory subunit N2 (PSMD1, RPN2) (1 of 2)	0	20.731	4	3	10	2	1006	109.4	5.29	10.03	3	0	1.357	0.806443	56.58	55	145	70.19	25.57	High	High	Peak Found	High	High	High	1		3	3	Present Both	1	GLYMA_05G241500	GLYMA_05G241500	sp|O48844|PSD1A_ARATH	26S proteasome non-ATPase regulatory subunit 1 homolog A GN=RPN2A	ident:852/1006 pos:904/1006 query:1006 hit:1004 align:1009 bit:1688.3	OK	26S proteasome non-ATPase regulatory subunit 1 homolog A	26S proteasome regulatory subunit RPN2a (AtRPN2a); 26S proteasome regulatory subunit S1 homolog A	PSD1A_ARATH	O48844	Q570D7; Q6XJG7	RPN2A	na	Arabidopsis thaliana (Mouse-ear cress)	3702
High	Master Protein	GLYMA_11G227700	K03038 - 26S proteasome regulatory subunit N8 (PSMD7, RPN8) (1 of 3)	0	37.273	14	4	13	4	309	34.8	6.28	39.4	4	0	4.894	0.00015812	67.34	21	179	58.77	43.39	High	High	High	High	High	High	1	Acetyl [N-Term]	3	3	Present Both	1	GLYMA_11G227700	GLYMA_11G227700	sp|O24412|PSD7A_ARATH	26S proteasome non-ATPase regulatory subunit 7 homolog A GN=RPN8A	ident:278/309 pos:296/309 query:309 hit:308 align:308 bit:572.8	OK	26S proteasome non-ATPase regulatory subunit 7 homolog A	26S proteasome regulatory subunit RPN8a (AtRPN8a); Protein ASYMMETRIC LEAVES ENHANCER 3; Protein MOV34 (AtMOV34)	PSD7A_ARATH	O24412	Q6EMB3	RPN8A	AE3; MOV34	Arabidopsis thaliana (Mouse-ear cress)	3702
High	Master Protein	GLYMA_03G170600	K03062 - 26S proteasome regulatory subunit T2 (PSMC1, RPT2) (1 of 6)	0	38.983	18	6	16	1	446	49.5	6.21	43.92	6	3	1.78	0.391826	98.85	56.8	143.2	24.29	14.31	High	High	High	High	High	High	1		3	3	Present Both	1	GLYMA_03G170600	GLYMA_03G170600	sp|Q9SZD4|PRS4A_ARATH	26S proteasome regulatory subunit 4 homolog A GN=RPT2A	ident:430/446 pos:439/446 query:446 hit:443 align:446 bit:864.0	OK	26S proteasome regulatory subunit 4 homolog A	26S proteasome AAA-ATPase subunit RPT2a; 26S proteasome subunit 4 homolog A; Protein HALTED ROOT; Regulatory particle triple-A ATPase subunit 2a	PRS4A_ARATH	Q9SZD4	Q9SEI5	RPT2A	HLR	Arabidopsis thaliana (Mouse-ear cress)	3702
High	Master Protein	GLYMA_13G130400	K03062 - 26S proteasome regulatory subunit T2 (PSMC1, RPT2) (1 of 6)	0	34.541	18	6	13	1	443	49.3	6.21	35.83	6	0	2.57	0.0648368	69.68	61.1	138.9	53.56	41.27	High	High	Peak Found	Peak Found	High	Peak Found	1		3	3	Present Both	1	GLYMA_13G130400	GLYMA_13G130400	sp|Q9SZD4|PRS4A_ARATH	26S proteasome regulatory subunit 4 homolog A GN=RPT2A	ident:429/443 pos:439/443 query:443 hit:443 align:443 bit:870.2	OK	26S proteasome regulatory subunit 4 homolog A	26S proteasome AAA-ATPase subunit RPT2a; 26S proteasome subunit 4 homolog A; Protein HALTED ROOT; Regulatory particle triple-A ATPase subunit 2a	PRS4A_ARATH	Q9SZD4	Q9SEI5	RPT2A	HLR	Arabidopsis thaliana (Mouse-ear cress)	3702
High	Master Protein	GLYMA_10G151900	K03065 - 26S proteasome regulatory subunit T5 (PSMC3, RPT5) (1 of 4)	0	94.554	33	11	41	8	423	47.4	5.11	99.03	11	2	1.825	0.368027	31.73	60.7	139.3	27.09	15.78	High	High	High	High	High	High	1		3	3	Present Both	1	GLYMA_10G151900	GLYMA_10G151900	sp|Q9SEI2|PS6AA_ARATH	26S proteasome regulatory subunit 6A homolog A GN=RPT5A	ident:401/423 pos:418/423 query:423 hit:424 align:424 bit:825.5	OK	26S proteasome regulatory subunit 6A homolog A	26S proteasome AAA-ATPase subunit RPT5a; Proteasome 26S subunit 6A homolog A; Regulatory particle triple-A ATPase subunit 5a; Tat-binding protein 1 homolog A (TBP-1 homolog A)	PS6AA_ARATH	Q9SEI2	Q8H195; Q9SWY7	RPT5A	ATS6A.2; TBP1	Arabidopsis thaliana (Mouse-ear cress)	3702
High	Master Protein	GLYMA_07G002200	K03066 - 26S proteasome regulatory subunit T6 (PSMC5, RPT6) (1 of 3)	0	75.178	27	7	22	6	418	47.1	8.76	63	7	0	1.297	0.842928	49.28	62.2	137.8	56.44	4.62	High	High	High	High	Not Found	High	1		3	2	Present Both	1	GLYMA_07G002200	GLYMA_07G002200	sp|Q9C5U3|PRS8A_ARATH	26S proteasome regulatory subunit 8 homolog A GN=RPT6A	ident:386/418 pos:396/418 query:418 hit:419 align:419 bit:781.6	OK	26S proteasome regulatory subunit 8 homolog A	26S proteasome AAA-ATPase subunit RPT6a; 26S proteasome subunit 8 homolog A; Regulatory particle triple-A ATPase subunit 6a	PRS8A_ARATH	Q9C5U3	Q9SEI1	RPT6A	SUG1	Arabidopsis thaliana (Mouse-ear cress)	3702
High	Master Protein	GLYMA_15G205900	K03098 - apolipoprotein D and lipocalin family protein (APOD) (1 of 4)	0	32.463	23	3	11	3	184	21.2	8.07	29.15	3	0	1.041	0.978903	68.48	68.8	131.2	53.98	39.72	High	High	High	High	High	High	1		3	3	Present Both	1	GLYMA_15G205900	GLYMA_15G205900	sp|Q9FGT8|TIL_ARATH	Temperature-induced lipocalin-1 GN=TIL	ident:130/184 pos:156/184 query:184 hit:186 align:181 bit:280.0	OK	Temperature-induced lipocalin-1 (AtTIL1)	na	TIL_ARATH	Q9FGT8	Q8LE12	TIL	na	Arabidopsis thaliana (Mouse-ear cress)	3702
High	Master Protein	GLYMA_16G146000	K03105 - signal recognition particle subunit SRP19 (SRP19) (1 of 2)	0	4.63	15	2	4	2	137	15.3	9.96	6.66	2	0	2.225	0.153211	46.38	54	146	59.19	17.2	High	High	Peak Found	High	High	Peak Found	1		3	3	Present Both	1	GLYMA_16G146000	GLYMA_16G146000	sp|Q943Z6|SRP19_ARATH	Signal recognition particle 19 kDa protein GN=SRP19	ident:79/137 pos:94/137 query:137 hit:145 align:112 bit:173.7	OK	Signal recognition particle 19 kDa protein (SRP19)	na	SRP19_ARATH	Q943Z6	Q9LNG9	SRP19	na	Arabidopsis thaliana (Mouse-ear cress)	3702
High	Master Protein	GLYMA_05G200600	K03107 - signal recognition particle subunit SRP68 (SRP68) (1 of 2)	0	22.142	5	2	7	2	603	68.3	8.85	11	2	0	1.009	0.99265	17.04	100.7	99.3	8.67	39.91	High	High	Not Found	High	High	High	1		2	3	Present Both	1	GLYMA_05G200600	GLYMA_05G200600	sp|Q9FE36|LPXC4_ARATH	Probable UDP-3-O-acyl-N-acetylglucosamine deacetylase 4, mitochondrial GN=LPXC4	ident:20/603 pos:27/603 query:603 hit:326 align:57 bit:29.3	Partial_match_both	Probable UDP-3-O-acyl-N-acetylglucosamine deacetylase 4, mitochondrial (UDP-3-O-acyl-GlcNAc deacetylase 4)	Protein LIPID X C4 (AtLpxC4); UDP-3-O-[R-3-hydroxymyristoyl]-N-acetylglucosamine deacetylase 4	LPXC4_ARATH	P0DKB9	B3H6R1; P0C2G7; Q56X64; Q56XG5; Q7GAV1; Q8GXP0; Q8LPR6; Q9FE36; Q9FXK3; Q9FXK7	LPXC4	na	Arabidopsis thaliana (Mouse-ear cress)	3702
High	Master Protein	GLYMA_08G084800	K03189 - urease accessory protein (ureG) (1 of 1)	0	40.536	24	5	8	5	285	31.4	6.48	27.1	5	0	1.016	0.991598	53.05	69.2	130.8	76.39	35.44	High	High	High	High	High	High	1		3	3	Present Both	1	GLYMA_08G084800	GLYMA_08G084800	sp|O64700|UREG_ARATH	Urease accessory protein G GN=UREG	ident:224/285 pos:238/285 query:285 hit:275 align:254 bit:459.9	OK	Urease accessory protein G (AtUREG)	na	UREG_ARATH	O64700	Q9SYT8	UREG	na	Arabidopsis thaliana (Mouse-ear cress)	3702
High	Master Protein	GLYMA_17G186600	K03231 - elongation factor 1-alpha (EEF1A) (1 of 8)	0	422.986	42	21	250	9	447	49.4	9.06	866.36	21	15	1.267	0.869797	57.11	85.7	114.3	18.33	13.43	High	High	High	High	High	High	1		3	3	Present Both	1	GLYMA_17G186600	GLYMA_17G186600	sp|Q8GTY0|EF1A4_ARATH	Elongation factor 1-alpha 4 GN=A4	ident:425/447 pos:439/447 query:447 hit:449 align:446 bit:884.8	OK	Elongation factor 1-alpha 4 (EF-1-alpha 4)	eEF-1A4	EF1A4_ARATH	Q8GTY0	P13905; Q0WSD5; Q39093; Q9C5L4	A4	na	Arabidopsis thaliana (Mouse-ear cress)	3702
High	Master Protein	GLYMA_05G114900	K03231 - elongation factor 1-alpha (EEF1A) (1 of 8)	0	421.615	33	18	202	2	447	49.2	9.07	739.41	18	7	1.188	0.915533	48.56	86.2	113.8	21.75	13.97	High	High	High	High	High	High	1	Phospho [T249; R254; T257]	3	3	Present Both	1	GLYMA_05G114900	GLYMA_05G114900	sp|Q8GTY0|EF1A4_ARATH	Elongation factor 1-alpha 4 GN=A4	ident:433/447 pos:440/447 query:447 hit:449 align:446 bit:899.0	OK	Elongation factor 1-alpha 4 (EF-1-alpha 4)	eEF-1A4	EF1A4_ARATH	Q8GTY0	P13905; Q0WSD5; Q39093; Q9C5L4	A4	na	Arabidopsis thaliana (Mouse-ear cress)	3702
High	Master Protein	GLYMA_19G052400.2.p	K03231 - elongation factor 1-alpha (EEF1A) (1 of 8)	0	417.241	33	18	229	1	447	49.2	9.07	842.38	18	0	0.922	0.999223	134.88	104	96	108.97	17.25	High	Not Found	High	High	Not Found	High	1	Phospho [T249; R254; T257]	2	2	Present Both	1	GLYMA_19G052400.2.p	GLYMA_19G052400.2.p	sp|Q8GTY0|EF1A4_ARATH	Elongation factor 1-alpha 4 GN=A4	ident:433/447 pos:440/447 query:447 hit:449 align:446 bit:897.9	OK	Elongation factor 1-alpha 4 (EF-1-alpha 4)	eEF-1A4	EF1A4_ARATH	Q8GTY0	P13905; Q0WSD5; Q39093; Q9C5L4	A4	na	Arabidopsis thaliana (Mouse-ear cress)	3702
High	Master Protein	GLYMA_19G078900	K03231 - elongation factor 1-alpha (EEF1A) (1 of 8)	0	187.484	55	7	143	2	154	16.9	9.23	490.13	7	0	1.203	0.899245	17.86	89.4	110.6	75.74	12.96	High	High	High	High	High	High	1		3	3	Present Both	1	GLYMA_19G078900	GLYMA_19G078900	sp|Q8GTY0|EF1A4_ARATH	Elongation factor 1-alpha 4 GN=A4	ident:141/154 pos:148/154 query:154 hit:449 align:182 bit:271.6	Partial_match_hit	Elongation factor 1-alpha 4 (EF-1-alpha 4)	eEF-1A4	EF1A4_ARATH	Q8GTY0	P13905; Q0WSD5; Q39093; Q9C5L4	A4	na	Arabidopsis thaliana (Mouse-ear cress)	3702
High	Master Protein	GLYMA_13G073200	K03232 - elongation factor 1-beta (EEF1B) (1 of 5)	0	103.593	45	8	34	6	224	24.2	4.65	106.24	8	0	1.563	0.579664	81.97	54.2	145.8	76.03	44.18	High	High	High	High	High	High	1		3	3	Present Both	1	GLYMA_13G073200	GLYMA_13G073200	sp|Q84WM9|EF1B1_ARATH	Elongation factor 1-beta 1 GN=A3	ident:164/224 pos:187/224 query:224 hit:228 align:228 bit:304.3	OK	Elongation factor 1-beta 1 (EF-1-beta 1)	Elongation factor 1-beta' 1 (EF-1-beta' 1); Elongation factor 1B-alpha 1; eEF-1B alpha 1	EF1B1_ARATH	Q84WM9	Q9SCX2; Q9SCX4	OrderedLocusNames=At5g12110	na	Arabidopsis thaliana (Mouse-ear cress)	3702
High	Master Protein	GLYMA_08G170000	K03234 - elongation factor 2 (EEF2) (1 of 3)	0	400.294	38	26	121	26	843	94	6.11	449.54	26	0	1.192	0.909812	78.21	61.2	138.8	49.31	35.87	High	High	High	High	High	High	1		3	3	Present Both	1	GLYMA_08G170000	GLYMA_08G170000	sp|Q9SGT4|EF2_ARATH	Elongation factor 2 GN=LOS1	ident:786/843 pos:817/843 query:843 hit:843 align:843 bit:1658.7	OK	Elongation factor 2 (EF-2)	Protein LOW EXPRESSION OF OSMOTICALLY RESPONSIVE GENES 1	EF2_ARATH	Q9ASR1	C0Z355; Q56WX9; Q56WY3; Q570K2; Q84R07; Q8H145; Q94CA4; Q9SGT4	LOS1	na	Arabidopsis thaliana (Mouse-ear cress)	3702
High	Master Protein	GLYMA_08G171500	K03242 - translation initiation factor 2 subunit 3 (EIF2S3) (1 of 2)	0	14.2	8	3	6	3	466	50.9	8.68	17	3	0	1.579	0.562381	43.74	65.3	134.7	56.77	24.95	High	Peak Found	High	High	High	High	1		3	3	Present Both	1	GLYMA_08G171500	GLYMA_08G171500	sp|Q9ZT91|EFTM_ARATH	Elongation factor Tu, mitochondrial GN=TUFA	ident:78/466 pos:122/466 query:466 hit:454 align:279 bit:76.3	Poor_match	Elongation factor Tu, mitochondrial	na	EFTM_ARATH	Q9ZT91	Q39206	TUFA	na	Arabidopsis thaliana (Mouse-ear cress)	3702
High	Master Protein	GLYMA_12G002900	K03246 - translation initiation factor 3 subunit I (EIF3I) (1 of 3)	0	267.199	69	19	72	6	326	35.9	6.76	281.47	19	11	1.255	0.870366	76.67	86.8	113.2	9.48	21.08	High	High	High	High	High	High	1		3	3	Present Both	1	GLYMA_12G002900	GLYMA_12G002900	sp|Q38884|EIF3I_ARATH	Eukaryotic translation initiation factor 3 subunit I GN=TIF3I1	ident:266/326 pos:300/326 query:326 hit:328 align:328 bit:548.1	OK	Eukaryotic translation initiation factor 3 subunit I (eIF3i)	Eukaryotic translation initiation factor 3 subunit 2; TGF-beta receptor-interacting protein 1 (TRIP-1); eIF-3-beta; eIF3 p36	EIF3I_ARATH	Q38884	O82342; Q94K09; Q9C5Z0	TIF3I1	na	Arabidopsis thaliana (Mouse-ear cress)	3702
High	Master Protein	GLYMA_01G029600	K03246 - translation initiation factor 3 subunit I (EIF3I) (1 of 3)	0	211.317	67	18	70	7	326	35.8	7.34	236.96	18	1	1.287	0.849629	36.3	69.3	130.7	28.06	21.25	High	High	High	High	High	High	1		3	3	Present Both	1	GLYMA_01G029600	GLYMA_01G029600	sp|Q38884|EIF3I_ARATH	Eukaryotic translation initiation factor 3 subunit I GN=TIF3I1	ident:271/326 pos:301/326 query:326 hit:328 align:328 bit:554.3	OK	Eukaryotic translation initiation factor 3 subunit I (eIF3i)	Eukaryotic translation initiation factor 3 subunit 2; TGF-beta receptor-interacting protein 1 (TRIP-1); eIF-3-beta; eIF3 p36	EIF3I_ARATH	Q38884	O82342; Q94K09; Q9C5Z0	TIF3I1	na	Arabidopsis thaliana (Mouse-ear cress)	3702
High	Master Protein	GLYMA_18G133400	K03248 - translation initiation factor 3 subunit G (EIF3G) (1 of 2)	0	101.616	55	14	45	14	290	32.2	8.21	104.36	14	0	1.067	0.976873	60.6	101.6	98.4	13.78	28.41	High	High	High	High	High	High	1		3	3	Present Both	1	GLYMA_18G133400	GLYMA_18G133400	sp|Q9SYG4|UBP1A_ARATH	Oligouridylate-binding protein 1A GN=UBP1A	ident:38/290 pos:52/290 query:290 hit:426 align:89 bit:67.4	Partial_match_both	Oligouridylate-binding protein 1A (AtUBP1a)	Polyuridylate-binding protein UBP1A (Poly(U)-binding protein UBP1A)	UBP1A_ARATH	Q9SYG4	na	UBP1A	na	Arabidopsis thaliana (Mouse-ear cress)	3702
High	Master Protein	GLYMA_10G106100	K03250 - translation initiation factor 3 subunit E (EIF3E, INT6) (1 of 2)	0	52.602	10	4	17	2	437	51.2	5.64	27.65	4	3	0.798	0.929532	34.31	79	121	22.78	58.01	High	High	High	High	High	High	1		3	3	Present Both	1	GLYMA_10G106100	GLYMA_10G106100	sp|Q9C5Z3|EIF3E_ARATH	Eukaryotic translation initiation factor 3 subunit E GN=TIF3E1	ident:378/437 pos:406/437 query:437 hit:441 align:434 bit:800.4	OK	Eukaryotic translation initiation factor 3 subunit E (AtEIF3E-1; eIF3e; p48)	Eukaryotic translation initiation factor 3 subunit 6 (AtINT6; INT-6)	EIF3E_ARATH	Q9C5Z3	Q9M2L8; Q9M4T7	TIF3E1	na	Arabidopsis thaliana (Mouse-ear cress)	3702
High	Master Protein	GLYMA_02G187100	K03250 - translation initiation factor 3 subunit E (EIF3E, INT6) (1 of 2)	0	34.707	8	3	15	1	437	51.1	5.82	31.35	3	0	1.345	0.815367	11.92	84.2	115.8	57.26	4.81	High	High	High	High	High	High	1		3	3	Present Both	1	GLYMA_02G187100	GLYMA_02G187100	sp|Q9C5Z3|EIF3E_ARATH	Eukaryotic translation initiation factor 3 subunit E GN=TIF3E1	ident:376/437 pos:405/437 query:437 hit:441 align:434 bit:799.7	OK	Eukaryotic translation initiation factor 3 subunit E (AtEIF3E-1; eIF3e; p48)	Eukaryotic translation initiation factor 3 subunit 6 (AtINT6; INT-6)	EIF3E_ARATH	Q9C5Z3	Q9M2L8; Q9M4T7	TIF3E1	na	Arabidopsis thaliana (Mouse-ear cress)	3702
High	Master Protein	GLYMA_15G075100	K03251 - translation initiation factor 3 subunit D (EIF3D) (1 of 2)	0	31.455	13	3	11	2	565	64.3	5.71	30.3	3	1	1.713	0.45194	74.46	95.8	104.2	53.39	39.63	High	Not Found	Not Found	High	Peak Found	High	1		1	3	Only Sample	1	GLYMA_15G075100	GLYMA_15G075100	sp|P56820|EIF3D_ARATH	Eukaryotic translation initiation factor 3 subunit D GN=TIF3D1	ident:464/565 pos:509/565 query:565 hit:591 align:587 bit:932.6	OK	Eukaryotic translation initiation factor 3 subunit D (eIF3d)	Eukaryotic translation initiation factor 3 subunit 7; eIF-3-zeta; p66	EIF3D_ARATH	P56820	B5X0N5; Q9C5Y8	TIF3D1	na	Arabidopsis thaliana (Mouse-ear cress)	3702
High	Master Protein	GLYMA_03G206400	K03252 - translation initiation factor 3 subunit C (EIF3C) (1 of 3)	0	24.143	6	3	8	3	926	104.6	5.63	12.22	3	0	0.92	0.999223	20.72	110.9	89.1	21.17	33.51	High	High	High	High	High	High	1		3	3	Present Both	1	GLYMA_03G206400	GLYMA_03G206400	sp|O49160|EIF3C_ARATH	Eukaryotic translation initiation factor 3 subunit C GN=TIF3C1	ident:641/926 pos:743/926 query:926 hit:900 align:936 bit:1180.2	OK	Eukaryotic translation initiation factor 3 subunit C (eIF3c)	Eukaryotic translation initiation factor 3 subunit 8; eIF3 p110; p105	EIF3C_ARATH	O49160	Q9LYM6	TIF3C1	na	Arabidopsis thaliana (Mouse-ear cress)	3702
High	Master Protein	GLYMA_03G172200.2.p	K03254 - translation initiation factor 3 subunit A (EIF3A) (1 of 2)	0	256.506	19	21	81	5	958	111.9	9.29	262.5	21	0	1.08	0.965939	85.69	89.2	110.8	66.94	48.32	High	High	Peak Found	High	High	High	1		3	3	Present Both	1	GLYMA_03G172200.2.p	GLYMA_03G172200.2.p	sp|Q9LD55|EIF3A_ARATH	Eukaryotic translation initiation factor 3 subunit A GN=TIF3A1	ident:697/958 pos:815/958 query:958 hit:987 align:962 bit:1321.2	OK	Eukaryotic translation initiation factor 3 subunit A (eIF3a)	Eukaryotic translation initiation factor 3 large subunit; Eukaryotic translation initiation factor 3 subunit 10; eIF-3-theta; p114	EIF3A_ARATH	Q9LD55	na	TIF3A1	na	Arabidopsis thaliana (Mouse-ear cress)	3702
High	Master Protein	GLYMA_19G173100	K03254 - translation initiation factor 3 subunit A (EIF3A) (1 of 2)	0	249.291	22	22	90	6	957	111.7	9.33	274.47	22	12	1.269	0.867298	56.99	88.1	111.9	31.23	13.81	High	High	Peak Found	High	High	High	1		3	3	Present Both	1	GLYMA_19G173100	GLYMA_19G173100	sp|Q9LD55|EIF3A_ARATH	Eukaryotic translation initiation factor 3 subunit A GN=TIF3A1	ident:702/957 pos:813/957 query:957 hit:987 align:984 bit:1320.5	OK	Eukaryotic translation initiation factor 3 subunit A (eIF3a)	Eukaryotic translation initiation factor 3 large subunit; Eukaryotic translation initiation factor 3 subunit 10; eIF-3-theta; p114	EIF3A_ARATH	Q9LD55	na	TIF3A1	na	Arabidopsis thaliana (Mouse-ear cress)	3702
High	Master Protein	GLYMA_15G026100	K03257 - translation initiation factor 4A (EIF4A) (1 of 11)	0	132.145	34	13	53	6	413	46.6	5.55	158.54	13	0	2.317	0.121326	81.24	44.7	155.3	73.88	27.43	High	High	High	High	High	High	1		3	3	Present Both	1	GLYMA_15G026100	GLYMA_15G026100	sp|P41377|IF4A2_ARATH	Eukaryotic initiation factor 4A-2 GN=TIF4A-2	ident:385/413 pos:399/413 query:413 hit:412 align:414 bit:790.0	OK	Eukaryotic initiation factor 4A-2 (eIF-4A-2)	ATP-dependent RNA helicase eIF4A-2; DEAD-box ATP-dependent RNA helicase 19	IF4A2_ARATH	P41377	Q0WWK5	TIF4A-2	RH19	Arabidopsis thaliana (Mouse-ear cress)	3702
High	Master Protein	GLYMA_02G203700	K03263 - translation initiation factor 5A (EIF5A) (1 of 7)	0	10.856	11	4	13	4	160	17.5	5.76	22.43	4	0	1.413	0.746272	36.42	89.7	110.3	50.85	12.29	High	High	High	High	High	High	1		3	3	Present Both	1	GLYMA_02G203700	GLYMA_02G203700	sp|Q9XI91|IF5A1_ARATH	Eukaryotic translation initiation factor 5A-1 GN=ELF5A-1	ident:142/160 pos:150/160 query:160 hit:158 align:159 bit:292.0	OK	Eukaryotic translation initiation factor 5A-1 (AtELF5A-1; eIF-5A-1)	na	IF5A1_ARATH	Q9XI91	Q9LMG2	ELF5A-1	na	Arabidopsis thaliana (Mouse-ear cress)	3702
High	Master Protein	GLYMA_19G125500	K03626 - nascent polypeptide-associated complex subunit alpha (EGD2, NACA) (1 of 8)	0	43.687	20	4	16	2	205	22.4	4.63	42.96	4	3	1.42	0.740239	69.41	48.4	151.6	22.55	52.48	High	Not Found	High	High	High	High	1		2	3	Present Both	1	GLYMA_19G125500	GLYMA_19G125500	sp|Q9LHG9|NACA1_ARATH	Nascent polypeptide-associated complex subunit alpha-like protein 1 GN=NAC030	ident:156/205 pos:175/205 query:205 hit:203 align:202 bit:240.7	OK	Nascent polypeptide-associated complex subunit alpha-like protein 1 (NAC-alpha-like protein 1)	Alpha-NAC-like protein 1	NACA1_ARATH	Q9LHG9	na	OrderedLocusNames=At3g12390	na	Arabidopsis thaliana (Mouse-ear cress)	3702
High	Master Protein	GLYMA_04G200400.2.p	K03696 - ATP-dependent Clp protease ATP-binding subunit ClpC (clpC) (1 of 6)	0	119.005	27	20	44	4	922	102.5	6.55	114.14	20	12	1.218	0.897585	101.51	112	88	3.6	82.57	High	High	High	High	High	High	1	Phospho [R176]	3	3	Present Both	1	GLYMA_04G200400.2.p	GLYMA_04G200400.2.p	sp|Q9FI56|CLPC1_ARATH	Chaperone protein ClpC1, chloroplastic GN=CLPC1	ident:821/922 pos:863/922 query:922 hit:929 align:925 bit:1596.6	OK	Chaperone protein ClpC1, chloroplastic	ATP-dependent Clp protease ATP-binding subunit ClpC homolog 1; Casein lytic proteinase C1; Protein DE-REGULATED CAO ACCUMULATION 1; Protein IRON-RESCUED MUTANT 1	CLPC1_ARATH	Q9FI56	O48931	CLPC1	na	Arabidopsis thaliana (Mouse-ear cress)	3702
High	Master Protein	GLYMA_07G090900	K03754 - translation initiation factor eIF-2B subunit beta (EIF2B2) (1 of 3)	0	4.436	3	1	2	1	415	44.5	6.1	2.09	1	0	100	9.48889e-17			200		2.3	High	Not Found	Not Found	High	Peak Found	Peak Found	1		1	3	Only Sample	1	GLYMA_07G090900	GLYMA_07G090900	sp|Q9ZUG4|MTNA_ARATH	Methylthioribose-1-phosphate isomerase GN=MTK	ident:53/415 pos:74/415 query:415 hit:374 align:159 bit:66.2	Partial_match_both	Methylthioribose-1-phosphate isomerase (M1Pi; MTR-1-P isomerase)	S-methyl-5-thioribose-1-phosphate isomerase; Translation initiation factor eIF-2B subunit alpha/beta/delta-like protein	MTNA_ARATH	Q9ZUG4	Q8L5B9; Q8LAU5	OrderedLocusNames=At2g05830	na	Arabidopsis thaliana (Mouse-ear cress)	3702
High	Master Protein	GLYMA_13G249600	K03809 - NAD(P)H dehydrogenase (quinone) (wrbA) (1 of 20)	0	401.731	67	20	198	3	203	21.7	6.95	839.31	20	18	0.954	0.999223	55.7	106.2	93.8	30.93	11.27	High	High	High	High	High	High	1		3	3	Present Both	1	GLYMA_13G249600	GLYMA_13G249600	sp|Q6NQE2|FQRL1_ARATH	Probable NAD(P)H dehydrogenase (quinone) FQR1-like 1 GN=FPGS3	ident:170/203 pos:182/203 query:203 hit:205 align:201 bit:351.3	OK	Probable NAD(P)H dehydrogenase (quinone) FQR1-like 1	na	FQRL1_ARATH	Q6NQE2	O81830	OrderedLocusNames=At4g27270	na	Arabidopsis thaliana (Mouse-ear cress)	3702
High	Master Protein	GLYMA_15G064700.2.p	K03809 - NAD(P)H dehydrogenase (quinone) (wrbA) (1 of 20)	0	398.538	67	19	200	2	203	21.7	6.95	849.81	19	0	0.643	0.731446	12.8	122.8	77.2	10.99	10.3	High	High	High	High	High	High	1		3	3	Present Both	1	GLYMA_15G064700.2.p	GLYMA_15G064700.2.p	sp|Q6NQE2|FQRL1_ARATH	Probable NAD(P)H dehydrogenase (quinone) FQR1-like 1 GN=FPGS3	ident:173/203 pos:184/203 query:203 hit:205 align:201 bit:357.1	OK	Probable NAD(P)H dehydrogenase (quinone) FQR1-like 1	na	FQRL1_ARATH	Q6NQE2	O81830	OrderedLocusNames=At4g27270	na	Arabidopsis thaliana (Mouse-ear cress)	3702
High	Master Protein	GLYMA_13G284200	K03809 - NAD(P)H dehydrogenase (quinone) (wrbA) (1 of 20)	0	204.148	64	13	78	1	203	21.7	6.95	261.07	13	0	0.526	0.419363	2.28	131.1	68.9	8.34	5.14	High	High	High	High	High	High	1		3	3	Present Both	1	GLYMA_13G284200	GLYMA_13G284200	sp|Q9LSQ5|FQR1_ARATH	NAD(P)H dehydrogenase (quinone) FQR1 GN=FQR1	ident:181/203 pos:192/203 query:203 hit:204 align:200 bit:376.7	OK	NAD(P)H dehydrogenase (quinone) FQR1	Flavodoxin-like quinone reductase 1	FQR1_ARATH	Q9LSQ5	na	FQR1	na	Arabidopsis thaliana (Mouse-ear cress)	3702
High	Master Protein	GLYMA_12G216900	K03809 - NAD(P)H dehydrogenase (quinone) (wrbA) (1 of 20)	0	202.297	64	13	77	1	203	21.8	6.95	259.26	13	8	0.967	0.999223	69.34	113.4	86.6	34.15	33.81	High	High	Peak Found	High	High	Peak Found	1		3	3	Present Both	1	GLYMA_12G216900	GLYMA_12G216900	sp|Q9LSQ5|FQR1_ARATH	NAD(P)H dehydrogenase (quinone) FQR1 GN=FQR1	ident:181/203 pos:192/203 query:203 hit:204 align:200 bit:378.3	OK	NAD(P)H dehydrogenase (quinone) FQR1	Flavodoxin-like quinone reductase 1	FQR1_ARATH	Q9LSQ5	na	FQR1	na	Arabidopsis thaliana (Mouse-ear cress)	3702
High	Master Protein	GLYMA_07G188200	K03809 - NAD(P)H dehydrogenase (quinone) (wrbA) (1 of 20)	0	165.045	62	12	75	1	207	22	6.95	221.18	12	3	0.949	0.999223	31.87	89.4	110.6	77.89	31.51	High	High	Not Found	Peak Found	High	Peak Found	1		2	3	Present Both	1	GLYMA_07G188200	GLYMA_07G188200	sp|Q9LSQ5|FQR1_ARATH	NAD(P)H dehydrogenase (quinone) FQR1 GN=FQR1	ident:177/207 pos:187/207 query:207 hit:204 align:201 bit:365.9	OK	NAD(P)H dehydrogenase (quinone) FQR1	Flavodoxin-like quinone reductase 1	FQR1_ARATH	Q9LSQ5	na	FQR1	na	Arabidopsis thaliana (Mouse-ear cress)	3702
High	Master Protein	GLYMA_08G061200	K03809 - NAD(P)H dehydrogenase (quinone) (wrbA) (1 of 20)	0	159.197	58	11	69	2	205	21.7	6.54	213.68	11	0	0.961	0.999223	30.9	109.7	90.3	52.2	13.23	High	High	Peak Found	High	High	High	1		3	3	Present Both	1	GLYMA_08G061200	GLYMA_08G061200	sp|Q9LSQ5|FQR1_ARATH	NAD(P)H dehydrogenase (quinone) FQR1 GN=FQR1	ident:175/205 pos:185/205 query:205 hit:204 align:201 bit:362.5	OK	NAD(P)H dehydrogenase (quinone) FQR1	Flavodoxin-like quinone reductase 1	FQR1_ARATH	Q9LSQ5	na	FQR1	na	Arabidopsis thaliana (Mouse-ear cress)	3702
High	Master Protein	GLYMA_11G214800	K03934 - NADH dehydrogenase (ubiquinone) Fe-S protein 1 (NDUFS1) (1 of 2)	0	344.066	49	27	149	9	747	81.3	6.7	484.07	27	21	0.715	0.849629	28.45	124.2	75.8	35.12	52.82	High	High	High	High	High	High	1		3	3	Present Both	1	GLYMA_11G214800	GLYMA_11G214800	sp|Q9FGI6|NDUS1_ARATH	NADH dehydrogenase [ubiquinone] iron-sulfur protein 1, mitochondrial GN=EMB1467	ident:604/747 pos:671/747 query:747 hit:748 align:747 bit:1248.8	OK	NADH dehydrogenase [ubiquinone] iron-sulfur protein 1, mitochondrial	Protein EMBRYO DEFECTIVE 1467	NDUS1_ARATH	Q9FGI6	Q940B1	EMB1467	na	Arabidopsis thaliana (Mouse-ear cress)	3702
High	Master Protein	GLYMA_18G041700	K03934 - NADH dehydrogenase (ubiquinone) Fe-S protein 1 (NDUFS1) (1 of 2)	0	281.432	44	24	119	6	746	81.2	6.62	375.81	24	0	0.662	0.777107	9.71	109.7	90.3	65.93	21.49	High	High	High	High	High	High	1		3	3	Present Both	1	GLYMA_18G041700	GLYMA_18G041700	sp|Q9FGI6|NDUS1_ARATH	NADH dehydrogenase [ubiquinone] iron-sulfur protein 1, mitochondrial GN=EMB1467	ident:601/746 pos:666/746 query:746 hit:748 align:746 bit:1237.6	OK	NADH dehydrogenase [ubiquinone] iron-sulfur protein 1, mitochondrial	Protein EMBRYO DEFECTIVE 1467	NDUS1_ARATH	Q9FGI6	Q940B1	EMB1467	na	Arabidopsis thaliana (Mouse-ear cress)	3702
High	Master Protein	GLYMA_05G106100	K03937 - NADH dehydrogenase (ubiquinone) Fe-S protein 4 (NDUFS4) (1 of 2)	0	180.879	67	14	96	7	146	16.3	9.8	238.5	14	6	1.001	0.999223	56.65	99.3	100.7	46.48	23.89	High	High	High	High	High	High	1		3	3	Present Both	1	GLYMA_05G106100	GLYMA_05G106100	sp|Q9FJW4|NDUS4_ARATH	NADH dehydrogenase [ubiquinone] iron-sulfur protein 4, mitochondrial GN=FRO1	ident:109/146 pos:128/146 query:146 hit:154 align:149 bit:224.9	OK	NADH dehydrogenase [ubiquinone] iron-sulfur protein 4, mitochondrial	Protein FROSTBITE1	NDUS4_ARATH	Q9FJW4	Q8LC28	FRO1	na	Arabidopsis thaliana (Mouse-ear cress)	3702
High	Master Protein	GLYMA_17G160400	K03937 - NADH dehydrogenase (ubiquinone) Fe-S protein 4 (NDUFS4) (1 of 2)	0	155.758	66	13	73	6	146	16.3	9.85	183.16	13	0	1.123	0.940144	50.34	90.7	109.3	23.95	28.28	High	High	High	High	High	High	1		3	3	Present Both	1	GLYMA_17G160400	GLYMA_17G160400	sp|Q9FJW4|NDUS4_ARATH	NADH dehydrogenase [ubiquinone] iron-sulfur protein 4, mitochondrial GN=FRO1	ident:108/146 pos:128/146 query:146 hit:154 align:149 bit:224.6	OK	NADH dehydrogenase [ubiquinone] iron-sulfur protein 4, mitochondrial	Protein FROSTBITE1	NDUS4_ARATH	Q9FJW4	Q8LC28	FRO1	na	Arabidopsis thaliana (Mouse-ear cress)	3702
High	Master Protein	GLYMA_11G091800	K03939 - NADH dehydrogenase (ubiquinone) Fe-S protein 6 (NDUFS6) (1 of 2)	0	157.104	24	4	66	4	105	11.7	7.43	243	4	0	1.033	0.983811	63.9	81.6	118.4	30.38	42.14	High	High	High	High	High	High	1		3	3	Present Both	1	GLYMA_11G091800	GLYMA_11G091800	sp|Q9M9M6|NDUS6_ARATH	NADH dehydrogenase [ubiquinone] iron-sulfur protein 6, mitochondrial GN=NDL2	ident:77/105 pos:90/105 query:105 hit:110 align:113 bit:157.9	OK	NADH dehydrogenase [ubiquinone] iron-sulfur protein 6, mitochondrial	na	NDUS6_ARATH	Q9M9M6	Q41901	OrderedLocusNames=At3g03070	na	Arabidopsis thaliana (Mouse-ear cress)	3702
High	Master Protein	GLYMA_04G050600	K03940 - NADH dehydrogenase (ubiquinone) Fe-S protein 7 (NDUFS7) (1 of 3)	0	67.925	17	5	25	5	213	23.5	9.44	78.01	5	0	0.994	0.999223	40.38	80	120	26.21	40.32	High	High	High	High	High	High	1		3	3	Present Both	1	GLYMA_04G050600	GLYMA_04G050600	sp|Q42577|NDUS7_ARATH	NADH dehydrogenase [ubiquinone] iron-sulfur protein 7, mitochondrial GN=NEAP3	ident:179/213 pos:194/213 query:213 hit:218 align:221 bit:350.5	OK	NADH dehydrogenase [ubiquinone] iron-sulfur protein 7, mitochondrial	na	NDUS7_ARATH	Q42577	na	OrderedLocusNames=At5g11770	na	Arabidopsis thaliana (Mouse-ear cress)	3702
High	Master Protein	GLYMA_18G217700	K03945 - NADH dehydrogenase (ubiquinone) 1 alpha subcomplex subunit 1 (NDUFA1) (1 of 2)	0	96.982	41	4	44	2	64	7.3	8.92	124.01	4	0	0.928	0.999223	15.29	105.6	94.4	77.65	5.45	High	High	Peak Found	High	High	High	1		3	3	Present Both	1	GLYMA_18G217700	GLYMA_18G217700	sp|Q9C9Z5|NDUA1_ARATH	NADH dehydrogenase [ubiquinone] 1 alpha subcomplex subunit 1 GN=NDT1	ident:48/64 pos:60/64 query:64 hit:65 align:65 bit:107.1	OK	NADH dehydrogenase [ubiquinone] 1 alpha subcomplex subunit 1	na	NDUA1_ARATH	Q9C9Z5	Q84MD9	OrderedLocusNames=At3g08610	na	Arabidopsis thaliana (Mouse-ear cress)	3702
High	Master Protein	GLYMA_09G271600.2.p	K03945 - NADH dehydrogenase (ubiquinone) 1 alpha subcomplex subunit 1 (NDUFA1) (1 of 2)	0	93.339	41	5	43	3	64	7.3	8.88	114.6	5	5	0.952	0.999223	61.69	101.8	98.2	63.2	10.81	High	Peak Found	Not Found	High	High	High	1		2	3	Present Both	1	GLYMA_09G271600.2.p	GLYMA_09G271600.2.p	sp|Q9C9Z5|NDUA1_ARATH	NADH dehydrogenase [ubiquinone] 1 alpha subcomplex subunit 1 GN=NDT1	ident:49/64 pos:60/64 query:64 hit:65 align:65 bit:107.5	OK	NADH dehydrogenase [ubiquinone] 1 alpha subcomplex subunit 1	na	NDUA1_ARATH	Q9C9Z5	Q84MD9	OrderedLocusNames=At3g08610	na	Arabidopsis thaliana (Mouse-ear cress)	3702
High	Master Protein	GLYMA_04G179100	K03946 - NADH dehydrogenase (ubiquinone) 1 alpha subcomplex subunit 2 (NDUFA2) (1 of 2)	0	58.278	29	5	38	2	98	11.1	9.36	116.15	5	3	0.787	0.919239	36.29	135.1	64.9	31.35	23.96	High	High	High	High	High	High	1		3	3	Present Both	1	GLYMA_04G179100	GLYMA_04G179100	sp|Q9FIJ2|NDUA2_ARATH	NADH dehydrogenase [ubiquinone] 1 alpha subcomplex subunit 2 GN=NDB1	ident:68/98 pos:87/98 query:98 hit:97 align:95 bit:155.2	OK	NADH dehydrogenase [ubiquinone] 1 alpha subcomplex subunit 2	na	NDUA2_ARATH	Q9FIJ2	na	OrderedLocusNames=At5g47890	na	Arabidopsis thaliana (Mouse-ear cress)	3702
High	Master Protein	GLYMA_06G185600	K03946 - NADH dehydrogenase (ubiquinone) 1 alpha subcomplex subunit 2 (NDUFA2) (1 of 2)	0	47.163	36	5	32	2	98	11	9.36	97.59	5	0	0.867	0.976873	73.65	131.9	68.1	84.91	55.19	High	High	Peak Found	High	High	Peak Found	1		3	3	Present Both	1	GLYMA_06G185600	GLYMA_06G185600	sp|Q9FIJ2|NDUA2_ARATH	NADH dehydrogenase [ubiquinone] 1 alpha subcomplex subunit 2 GN=NDB1	ident:66/98 pos:84/98 query:98 hit:97 align:95 bit:151.0	OK	NADH dehydrogenase [ubiquinone] 1 alpha subcomplex subunit 2	na	NDUA2_ARATH	Q9FIJ2	na	OrderedLocusNames=At5g47890	na	Arabidopsis thaliana (Mouse-ear cress)	3702
High	Master Protein	GLYMA_09G129000	K03949 - NADH dehydrogenase (ubiquinone) 1 alpha subcomplex subunit 5 (NDUFA5) (1 of 1)	0	49.623	37	4	29	4	166	18.6	5.01	128.51	4	0	1.037	0.981876	37.76	90.6	109.4	20.36	5.68	High	High	High	High	High	High	1		3	3	Present Both	1	GLYMA_09G129000	GLYMA_09G129000	sp|Q9FLX7|NDUA5_ARATH	Probable NADH dehydrogenase [ubiquinone] 1 alpha subcomplex subunit 5, mitochondrial GN=NSL1	ident:130/166 pos:142/166 query:166 hit:169 align:164 bit:266.5	OK	Probable NADH dehydrogenase [ubiquinone] 1 alpha subcomplex subunit 5, mitochondrial	na	NDUA5_ARATH	Q9FLX7	na	OrderedLocusNames=At5g52840	na	Arabidopsis thaliana (Mouse-ear cress)	3702
High	Master Protein	GLYMA_13G193600	K03950 - NADH dehydrogenase (ubiquinone) 1 alpha subcomplex subunit 6 (NDUFA6) (1 of 2)	0	176.204	88	13	95	3	131	15.1	8.7	239.29	13	15	0.915	0.997622	49.06	102.2	97.8	25.45	16.19	High	High	High	High	High	High	1		3	3	Present Both	1	GLYMA_13G193600	GLYMA_13G193600	sp|Q9LHI0|NDUA6_ARATH	NADH dehydrogenase [ubiquinone] 1 alpha subcomplex subunit 6 GN=NDC80	ident:84/131 pos:107/131 query:131 hit:133 align:128 bit:188.0	OK	NADH dehydrogenase [ubiquinone] 1 alpha subcomplex subunit 6	na	NDUA6_ARATH	Q9LHI0	na	OrderedLocusNames=At3g12260	na	Arabidopsis thaliana (Mouse-ear cress)	3702
High	Master Protein	GLYMA_15G231900	K03950 - NADH dehydrogenase (ubiquinone) 1 alpha subcomplex subunit 6 (NDUFA6) (1 of 2)	0	149.525	69	10	66	4	131	15.1	9.31	166.68	10	0	0.904	0.991598	60.94	88.1	111.9	42.38	45.79	High	High	High	High	High	High	1		3	3	Present Both	1	GLYMA_15G231900	GLYMA_15G231900	sp|Q9LHI0|NDUA6_ARATH	NADH dehydrogenase [ubiquinone] 1 alpha subcomplex subunit 6 GN=NDC80	ident:87/131 pos:109/131 query:131 hit:133 align:131 bit:193.4	OK	NADH dehydrogenase [ubiquinone] 1 alpha subcomplex subunit 6	na	NDUA6_ARATH	Q9LHI0	na	OrderedLocusNames=At3g12260	na	Arabidopsis thaliana (Mouse-ear cress)	3702
High	Master Protein	GLYMA_13G127400.2.p	K03953 - NADH dehydrogenase (ubiquinone) 1 alpha subcomplex subunit 9 (NDUFA9) (1 of 1)	0	108.833	48	14	52	14	396	43.8	9.2	131.95	14	0	0.741	0.879878	42.94	136.6	63.4	42.04	39.26	High	High	High	High	High	High	1		3	3	Present Both	1	GLYMA_13G127400.2.p	GLYMA_13G127400.2.p	sp|Q9SK66|NDUA9_ARATH	NADH dehydrogenase [ubiquinone] 1 alpha subcomplex subunit 9, mitochondrial GN=NCED9	ident:294/396 pos:352/396 query:396 hit:402 align:402 bit:599.0	OK	NADH dehydrogenase [ubiquinone] 1 alpha subcomplex subunit 9, mitochondrial	na	NDUA9_ARATH	Q9SK66	B9DHU2; Q93VY5	OrderedLocusNames=At2g20360	na	Arabidopsis thaliana (Mouse-ear cress)	3702
High	Master Protein	GLYMA_09G248500	K03955 - NADH dehydrogenase (ubiquinone) 1 alpha/beta subcomplex 1 (NDUFAB1) (1 of 5)	0	21.627	10	1	9	1	128	14.4	5.57	29.84	1	0	1.261	0.870366	68.34	113	87	31.81	86.39	High	High	High	High	High	High	1		3	3	Present Both	1	GLYMA_09G248500	GLYMA_09G248500	sp|O80800|ACPM2_ARATH	Acyl carrier protein 2, mitochondrial GN=MTACP2	ident:92/128 pos:103/128 query:128 hit:126 align:120 bit:182.2	OK	Acyl carrier protein 2, mitochondrial	MtACP-2 (ACP); NADH-ubiquinone oxidoreductase 9.6 kDa subunit	ACPM2_ARATH	O80800	Q8LEU1	MTACP2	na	Arabidopsis thaliana (Mouse-ear cress)	3702
High	Master Protein	GLYMA_20G108500	K03963 - NADH dehydrogenase (ubiquinone) 1 beta subcomplex subunit 7 (NDUFB7) (1 of 1)	0	155.11	60	8	138	8	98	11.6	8.18	342.94	8	0	0.804	0.934958	32.72	92	108	8.1	24.31	High	High	High	High	High	High	1	Acetyl [N-Term]	3	3	Present Both	1	GLYMA_20G108500	GLYMA_20G108500	sp|Q9SKC9|NDUB7_ARATH	NADH dehydrogenase [ubiquinone] 1 beta subcomplex subunit 7 GN=OFUT9	ident:75/98 pos:82/98 query:98 hit:103 align:105 bit:144.4	OK	NADH dehydrogenase [ubiquinone] 1 beta subcomplex subunit 7	na	NDUB7_ARATH	Q9SKC9	Q42155; Q42220; Q8GXZ6	OrderedLocusNames=At2g02050	na	Arabidopsis thaliana (Mouse-ear cress)	3702
High	Master Protein	GLYMA_04G008100	K03965 - NADH dehydrogenase (ubiquinone) 1 beta subcomplex subunit 9 (NDUFB9) (1 of 2)	0	76.019	62	9	31	2	115	13.5	7.58	80.59	9	7	0.941	0.999223	43	138.9	61.1	53.64	74.25	High	High	High	High	High	High	1		3	3	Present Both	1	GLYMA_04G008100	GLYMA_04G008100	sp|Q945M1|NDUB9_ARATH	NADH dehydrogenase [ubiquinone] 1 beta subcomplex subunit 9 GN=CIB22	ident:94/115 pos:99/115 query:115 hit:117 align:113 bit:196.1	OK	NADH dehydrogenase [ubiquinone] 1 beta subcomplex subunit 9	B22 subunit of eukaryotic mitochondrial complex I; Complex I-B22 (AtCIB22; CI-B22); NADH-ubiquinone oxidoreductase B22 subunit	NDUB9_ARATH	Q945M1	O65692; Q56Z32; Q8LDS9	CIB22	na	Arabidopsis thaliana (Mouse-ear cress)	3702
High	Master Protein	GLYMA_12G049400	K03969 - phage shock protein A (pspA) (1 of 3)	0	27.065	15	4	12	4	323	35.5	9.33	37.53	4	0	1.644	0.503241	23.7	59.6	140.4	9.7	23.43	High	High	High	High	High	High	1		3	3	Present Both	1	GLYMA_12G049400	GLYMA_12G049400	sp|O80796|VIPP1_ARATH	Membrane-associated protein VIPP1, chloroplastic GN=VIPP1	ident:225/323 pos:276/323 query:323 hit:330 align:332 bit:427.2	OK	Membrane-associated protein VIPP1, chloroplastic	Protein VESICLE-INDUCING PROTEIN IN PLASTIDS 1	VIPP1_ARATH	O80796	na	VIPP1	na	Arabidopsis thaliana (Mouse-ear cress)	3702
High	Master Protein	GLYMA_08G065100	K04043 - molecular chaperone DnaK (dnaK) (1 of 4)	0	63.009	15	10	37	1	677	72.5	6.04	93.1	10	5	0.909	0.99265	26.07	122.3	77.7	21.62	39	High	High	Peak Found	Peak Found	High	Not Found	1		3	2	Present Both	1	GLYMA_08G065100	GLYMA_08G065100	sp|Q9LDZ0|HSP7J_ARATH	Heat shock 70 kDa protein 10, mitochondrial GN=HSP70-10	ident:576/677 pos:627/677 query:677 hit:682 align:681 bit:1176.0	OK	Heat shock 70 kDa protein 10, mitochondrial	Heat shock protein 70-10 (AtHsp70-10); Mitochondrial heat shock protein 70-2 (mtHsc70-2)	HSP7J_ARATH	Q9LDZ0	na	HSP70-10	HSC70-5; MTHSC70-2	Arabidopsis thaliana (Mouse-ear cress)	3702
High	Master Protein	GLYMA_07G019000.2.p	K04499 - RuvB-like protein 1 (pontin 52) (RUVBL1, RVB1, INO80H) (1 of 2)	0	48.913	10	5	20	5	458	50.3	5.95	54.27	5	0	1.49	0.656886	68.87	69.3	130.7	19.03	29.48	High	High	Peak Found	High	High	High	1		3	3	Present Both	1	GLYMA_07G019000.2.p	GLYMA_07G019000.2.p	sp|Q9FMR9|RIN1_ARATH	RuvB-like protein 1 GN=RIN1	ident:419/458 pos:439/458 query:458 hit:458 align:458 bit:863.2	OK	RuvB-like protein 1	49 kDa TATA box-binding protein-interacting protein homolog (AtTIP49a); Ruv DNA-helicase-like protein	RIN1_ARATH	Q9FMR9	na	RIN1	RVB1; TIP49a	Arabidopsis thaliana (Mouse-ear cress)	3702
High	Master Protein	GLYMA_20G018500	K04507 - calcyclin binding protein (CACYBP, SIP) (1 of 2)	0	4.831	8	2	3	2	215	24.3	8.29	1.77	2	0	1.026	0.98584	20.35	78.6	121.4	20.58	2.45	High	Peak Found	High	Peak Found	High	Peak Found	1		3	3	Present Both	1	GLYMA_20G018500	GLYMA_20G018500	sp|Q9SUR9|SGT1A_ARATH	Protein SGT1 homolog A GN=SGT1A	ident:40/215 pos:78/215 query:215 hit:350 align:192 bit:37.4	Poor_match	Protein SGT1 homolog A (AtSGT1a)	Suppressor of G2 allele of SKP1 homolog A	SGT1A_ARATH	Q9SUR9	Q84LL4; Q8W515	SGT1A	na	Arabidopsis thaliana (Mouse-ear cress)	3702
High	Master Protein	GLYMA_02G041700	K04523 - ubiquilin (UBQLN, DSK2) (1 of 4)	0	24.596	3	1	9	1	545	58	4.79	30.15	1	0	0.454	0.242728	6.61	137.6	62.4	18.97	37.25	High	High	Peak Found	High	High	High	1		3	3	Present Both	1	GLYMA_02G041700	GLYMA_02G041700	sp|Q9SII8|DSK2B_ARATH	Ubiquitin domain-containing protein DSK2b GN=DSK2B	ident:320/545 pos:399/545 query:545 hit:551 align:564 bit:525.8	OK	Ubiquitin domain-containing protein DSK2b	na	DSK2B_ARATH	Q9SII8	Q94C51	DSK2B	na	Arabidopsis thaliana (Mouse-ear cress)	3702
High	Master Protein	GLYMA_11G118500	K04536 - guanine nucleotide-binding protein G(I)/G(S)/G(T) subunit beta-1 (GNB1) (1 of 4)	0	15.034	7	2	8	2	377	41	7.27	22.43	2	0	1.265	0.870366	36.07	89.1	110.9	62.76	7.8	High	High	Peak Found	High	High	High	1		3	3	Present Both	1	GLYMA_11G118500	GLYMA_11G118500	sp|P49177|GBB_ARATH	Guanine nucleotide-binding protein subunit beta GN=GB1	ident:306/377 pos:339/377 query:377 hit:377 align:376 bit:613.6	OK	Guanine nucleotide-binding protein subunit beta	AGB1; transducin	GBB_ARATH	P49177	na	GB1	na	Arabidopsis thaliana (Mouse-ear cress)	3702
High	Master Protein	GLYMA_03G242900.2.p	K04565 - superoxide dismutase, Cu-Zn family (SOD1) (1 of 6)	0	61.565	13	2	20	2	152	15.2	6.04	86.8	2	0	0.724	0.867298	31.36	122.9	77.1	55.64	9.87	High	High	High	High	High	High	1		3	3	Present Both	1	GLYMA_03G242900.2.p	GLYMA_03G242900.2.p	sp|P24704|SODC1_ARATH	Superoxide dismutase [Cu-Zn] 1 GN=CSD1	ident:126/152 pos:136/152 query:152 hit:152 align:152 bit:254.2	OK	Superoxide dismutase [Cu-Zn] 1	Copper/zinc superoxide dismutase 1	SODC1_ARATH	P24704	A3FMJ0; Q9FRQ6	CSD1	SODCC	Arabidopsis thaliana (Mouse-ear cress)	3702
High	Master Protein	GLYMA_19G240400	K04565 - superoxide dismutase, Cu-Zn family (SOD1) (1 of 6)	0	4.89	13	1	3	1	152	15.2	5.6	0	1	0	0.767	0.904524	20.73	113.2	86.8	38.67	25.03	High	High	Not Found	Peak Found	Not Found	Peak Found	1		2	2	Present Both	1	GLYMA_19G240400	GLYMA_19G240400	sp|P24704|SODC1_ARATH	Superoxide dismutase [Cu-Zn] 1 GN=CSD1	ident:126/152 pos:137/152 query:152 hit:152 align:152 bit:255.4	OK	Superoxide dismutase [Cu-Zn] 1	Copper/zinc superoxide dismutase 1	SODC1_ARATH	P24704	A3FMJ0; Q9FRQ6	CSD1	SODCC	Arabidopsis thaliana (Mouse-ear cress)	3702
High	Master Protein	GLYMA_11G231100	K04646 - clathrin heavy chain (CLTC) (1 of 8)	0	95.899	8	8	24	8	1700	192.9	5.44	70.32	8	0	1.091	0.957893	33.38	55.3	144.7	85.45	44.54	High	High	High	High	High	High	1		3	3	Present Both	1	GLYMA_11G231100	GLYMA_11G231100	sp|Q0WNJ6|CLAH1_ARATH	Clathrin heavy chain 1 GN=CHC1	ident:1536/1700 pos:1616/1700 query:1700 hit:1705 align:1657 bit:3226.8	OK	Clathrin heavy chain 1	na	CLAH1_ARATH	Q0WNJ6	Q0WM81; Q9SRM1	CHC1	na	Arabidopsis thaliana (Mouse-ear cress)	3702
High	Master Protein	GLYMA_20G103300	K04797 - prefoldin alpha subunit (pfdA, PFDN5) (1 of 2)	0	17.281	19	2	3	2	156	16.9	6.79	5.98	2	0	0.703	0.83963	14.26	127.7	72.3	19.22	22.69	High	Peak Found	Peak Found	High	Peak Found	Peak Found	1		3	3	Present Both	1	GLYMA_20G103300	GLYMA_20G103300	sp|P57742|PFD5_ARATH	Probable prefoldin subunit 5 GN=PEX2	ident:109/156 pos:131/156 query:156 hit:151 align:148 bit:223.4	OK	Probable prefoldin subunit 5	na	PFD5_ARATH	P57742	na	OrderedLocusNames=At5g23290	na	Arabidopsis thaliana (Mouse-ear cress)	3702
High	Master Protein	GLYMA_08G046600	K04798 - prefoldin beta subunit (pfdB, PFDN6) (1 of 2)	0	10.689	19	3	7	3	140	16.2	9.7	16.05	3	0	1.021	0.98677	47.34	93	107	48.97	7.1	High	High	Peak Found	High	High	High	1		3	3	Present Both	1	GLYMA_08G046600	GLYMA_08G046600	sp|Q9C6T1|PMK_ARATH	Phosphomevalonate kinase, peroxisomal GN=PMK	ident:29/140 pos:39/140 query:140 hit:505 align:83 bit:29.6	Partial_match_hit	Phosphomevalonate kinase, peroxisomal	5-phosphomevalonate kinase (AtPMK)	PMK_ARATH	Q9C6T1	Q681V6; Q682Q9	PMK	na	Arabidopsis thaliana (Mouse-ear cress)	3702
High	Master Protein	GLYMA_04G209000	K05546 - alpha 1,3-glucosidase (GANAB) (1 of 1)	0	105.4	16	12	55	12	914	103.9	6.4	141.29	12	0	0.992	0.999223	51.31	99.2	100.8	26.6	23.03	High	High	High	High	High	High	1		3	3	Present Both	1	GLYMA_04G209000	GLYMA_04G209000	sp|Q9FN05|PSL5_ARATH	Probable glucan 1,3-alpha-glucosidase GN=PSL5	ident:678/914 pos:775/914 query:914 hit:921 align:921 bit:1429.5	OK	Probable glucan 1,3-alpha-glucosidase	Glucosidase II subunit alpha; Protein PRIORITY IN SWEET LIFE 5; Protein RADIAL SWELLING 3	PSL5_ARATH	Q9FN05	na	PSL5	RSW3	Arabidopsis thaliana (Mouse-ear cress)	3702
High	Master Protein	GLYMA_20G019300	K05750 - NCK-associated protein 1 (NCKAP1, NAP125) (1 of 1)	0	12.26	1	1	7	1	1388	155.5	6.7	27.48	1	0	0.915	0.997627	76.23	146.3	53.7	61.7	68.88	High	High	Peak Found	High	High	High	1		3	3	Present Both	1	GLYMA_20G019300	GLYMA_20G019300	sp|Q5S2C4|NCKP1_ARATH	Protein NAP1 GN=NAP1	ident:1097/1388 pos:1241/1388 query:1388 hit:1425 align:1439 bit:2259.6	OK	Protein NAP1	ARP2/3 regulatory protein subunit NAPP; NAP of plants; Nck-associated protein 1 (AtNAP1; AtNAP125); Protein GNARLED; p125Nap1	NCKP1_ARATH	Q5S2C4	O82180; Q66GU3; Q6BDH4	NAP1	GRL; NAP; NAPP	Arabidopsis thaliana (Mouse-ear cress)	3702
High	Master Protein	GLYMA_08G032500	K05759 - profilin (PFN) (1 of 8)	0	11.044	18	2	12	2	131	14.1	4.84	25.63	2	0	0.644	0.734514	17.31	131	69	1.87	44.62	High	High	High	High	High	High	1		3	3	Present Both	1	GLYMA_08G032500	GLYMA_08G032500	sp|Q42418|PROF2_ARATH	Profilin-2 GN=PRO2	ident:103/131 pos:114/131 query:131 hit:131 align:131 bit:225.3	OK	Profilin-2	na	PROF2_ARATH	Q42418	Q9FS48	PRO2	PFN2; PRF2	Arabidopsis thaliana (Mouse-ear cress)	3702
High	Master Protein	GLYMA_09G057400.2.p	K05768 - gelsolin (GSN) (1 of 4)	0	49.131	12	9	23	3	963	107.6	6.27	45.97	9	5	1.016	0.991598	44.75	100.8	99.2	19.99	17.45	High	High	Peak Found	High	High	High	1		3	3	Present Both	1	GLYMA_09G057400.2.p	GLYMA_09G057400.2.p	sp|O65570|VILI4_ARATH	Villin-4 GN=VLN4	ident:741/963 pos:845/963 query:963 hit:974 align:978 bit:1498.0	OK	Villin-4	na	VILI4_ARATH	O65570	F4JPJ2; Q541Y5; Q9SZW9	VLN4	na	Arabidopsis thaliana (Mouse-ear cress)	3702
High	Master Protein	GLYMA_15G163700	K05768 - gelsolin (GSN) (1 of 4)	0	35.262	10	8	18	2	963	107.7	6.32	31.12	8	0	1.063	0.976873	32.15	98.9	101.1	17.46	35.15	High	High	High	High	Peak Found	High	1		3	3	Present Both	1	GLYMA_15G163700	GLYMA_15G163700	sp|O65570|VILI4_ARATH	Villin-4 GN=VLN4	ident:745/963 pos:846/963 query:963 hit:974 align:978 bit:1508.8	OK	Villin-4	na	VILI4_ARATH	O65570	F4JPJ2; Q541Y5; Q9SZW9	VLN4	na	Arabidopsis thaliana (Mouse-ear cress)	3702
High	Master Protein	GLYMA_13G295500	K05863 - solute carrier family 25 (mitochondrial adenine nucleotide translocator), member 4/5/6/31 (SLC25A4S, ANT) (1 of 12)	0	257.299	34	20	123	3	367	39.6	9.85	331.36	20	0	0.554	0.48997	20.44	76	124	127.14	0.77	High	Not Found	High	High	Not Found	High	1		2	2	Present Both	1	GLYMA_13G295500	GLYMA_13G295500	sp|O49447|ADT3_ARATH	ADP,ATP carrier protein 3, mitochondrial GN=AAC3	ident:311/367 pos:337/367 query:367 hit:379 align:376 bit:603.6	OK	ADP,ATP carrier protein 3, mitochondrial	ADP/ATP translocase 3; Adenine nucleotide translocator 3 (ANT 3)	ADT3_ARATH	O49447	Q8L9Y1	AAC3	ANT3	Arabidopsis thaliana (Mouse-ear cress)	3702
High	Master Protein	GLYMA_12G205400	K05863 - solute carrier family 25 (mitochondrial adenine nucleotide translocator), member 4/5/6/31 (SLC25A4S, ANT) (1 of 12)	0	253.966	31	18	123	1	367	39.4	9.79	352.44	18	0	0.594	0.597155	27.11	119.1	80.9	54.1	50.66	High	High	High	High	High	High	1		3	3	Present Both	1	GLYMA_12G205400	GLYMA_12G205400	sp|O49447|ADT3_ARATH	ADP,ATP carrier protein 3, mitochondrial GN=AAC3	ident:309/367 pos:334/367 query:367 hit:379 align:376 bit:597.4	OK	ADP,ATP carrier protein 3, mitochondrial	ADP/ATP translocase 3; Adenine nucleotide translocator 3 (ANT 3)	ADT3_ARATH	O49447	Q8L9Y1	AAC3	ANT3	Arabidopsis thaliana (Mouse-ear cress)	3702
High	Master Protein	GLYMA_03G026900	K06110 - exocyst complex component 3 (EXOC3, SEC6L1) (1 of 4)	0	95.13	11	8	26	8	756	86	4.88	70.52	8	0	0.756	0.897585	35.75	108.5	91.5	12.93	25.63	High	High	High	High	High	High	1	Acetyl [N-Term]	3	3	Present Both	1	GLYMA_03G026900	GLYMA_03G026900	sp|Q94AI6|SEC6_ARATH	Exocyst complex component SEC6 GN=SEC6	ident:674/756 pos:718/756 query:756 hit:752 align:756 bit:1379.4	OK	Exocyst complex component SEC6 (AtSec6)	na	SEC6_ARATH	Q94AI6	Q8RVQ6; Q9M9G4	SEC6	na	Arabidopsis thaliana (Mouse-ear cress)	3702
High	Master Protein	GLYMA_10G207900	K06111 - exocyst complex component 4 (EXOC4, SEC8L1) (1 of 2)	0.008	1.939	1	1	1	1	1066	118.2	5.77	1.71	1	0	1.06	0.976873	90.33	95.6	104.4	10.38	79.05	High	Peak Found	Peak Found	Not Found	Peak Found	Peak Found	1		3	2	Present Both	1	GLYMA_10G207900	GLYMA_10G207900	sp|Q93YU5|SEC8_ARATH	Exocyst complex component SEC8 GN=SEC8	ident:791/1066 pos:897/1066 query:1066 hit:1053 align:1069 bit:1530.0	OK	Exocyst complex component SEC8 (AtSec8)	Exocyst complex component 4	SEC8_ARATH	Q93YU5	Q541W5; Q9SS49	SEC8	na	Arabidopsis thaliana (Mouse-ear cress)	3702
High	Master Protein	GLYMA_05G127400	K06875 - programmed cell death protein 5 (PDCD5, TFAR19) (1 of 2)	0.007	2.056	6	1	2	1	129	14.8	5.71	0	1	0	0.966	0.999223	20.54	101.7	98.3	20.74	3.07	High	High	Peak Found	Peak Found	Not Found	Peak Found	1		3	2	Present Both	1	GLYMA_05G127400	GLYMA_05G127400	sp|Q9LD40|CNG13_ARATH	Putative cyclic nucleotide-gated ion channel 13 GN=CNGC13	ident:19/129 pos:32/129 query:129 hit:696 align:61 bit:27.3	Partial_match_both	Putative cyclic nucleotide-gated ion channel 13	Cyclic nucleotide- and calmodulin-regulated ion channel 13	CNG13_ARATH	Q9LD40	na	CNGC13	na	Arabidopsis thaliana (Mouse-ear cress)	3702
High	Master Protein	GLYMA_09G024800	K06942 - uncharacterized protein (K06942) (1 of 3)	0	13.335	6	2	7	2	394	44.4	6.8	18.33	2	0	0.962	0.999223	59.15	88.8	111.2	71.03	55.3	High	Peak Found	High	High	High	High	1		3	3	Present Both	1	GLYMA_09G024800	GLYMA_09G024800	sp|Q9SA73|OLA1_ARATH	Obg-like ATPase 1 GN=YchF1	ident:341/394 pos:368/394 query:394 hit:394 align:394 bit:721.1	OK	Obg-like ATPase 1	Ribosome-binding ATPase YchF (AtYchF1)	OLA1_ARATH	Q9SA73	Q8LDR5	YchF1	na	Arabidopsis thaliana (Mouse-ear cress)	3702
High	Master Protein	GLYMA_02G275500	K07199 - 5'-AMP-activated protein kinase, regulatory beta subunit (PRKAB) (1 of 9)	0	5.027	12	2	4	2	283	30.8	6.32	4.26	2	0	0.208	0.000492157	1.77	165.6	34.4	4.53	38.65	High	High	Not Found	High	Not Found	Peak Found	1		2	2	Present Both	1	GLYMA_02G275500	GLYMA_02G275500	sp|Q84VQ1|KINB1_ARATH	SNF1-related protein kinase regulatory subunit beta-1 GN=KINB1	ident:179/283 pos:219/283 query:283 hit:283 align:285 bit:326.2	OK	SNF1-related protein kinase regulatory subunit beta-1 (AKIN subunit beta-1; AKINB1; AKINbeta1)	na	KINB1_ARATH	Q84VQ1	Q9SCY6	KINB1	na	Arabidopsis thaliana (Mouse-ear cress)	3702
High	Master Protein	GLYMA_10G203200	K07213 - copper chaperone (ATOX1, ATX1, copZ) (1 of 4)	0	50.671	64	4	12	2	81	8.6	6.6	36	4	1	1.136	0.937244	35.03	81.1	118.9	12.91	47.71	High	High	High	High	High	High	1		3	3	Present Both	1	GLYMA_10G203200	GLYMA_10G203200	sp|Q94BT9|ATOX1_ARATH	Copper transport protein ATX1 GN=ATX1	ident:58/81 pos:68/81 query:81 hit:76 align:75 bit:125.9	OK	Copper transport protein ATX1	Copper chaperone ATX1	ATOX1_ARATH	Q94BT9	C0Z3B8; Q9C7U6	ATX1	na	Arabidopsis thaliana (Mouse-ear cress)	3702
High	Master Protein	GLYMA_20G187100	K07213 - copper chaperone (ATOX1, ATX1, copZ) (1 of 4)	0	40.993	27	3	8	1	123	13.6	7.72	25.14	3	0	0.997	0.999223	9.45	102.1	97.9	8.66	8.02	High	Peak Found	Peak Found	High	Not Found	High	1		3	2	Present Both	1	GLYMA_20G187100	GLYMA_20G187100	sp|Q94BT9|ATOX1_ARATH	Copper transport protein ATX1 GN=ATX1	ident:53/123 pos:62/123 query:123 hit:76 align:69 bit:117.5	Poor_match	Copper transport protein ATX1	Copper chaperone ATX1	ATOX1_ARATH	Q94BT9	C0Z3B8; Q9C7U6	ATX1	na	Arabidopsis thaliana (Mouse-ear cress)	3702
High	Master Protein	GLYMA_02G160500	K07213 - copper chaperone (ATOX1, ATX1, copZ) (1 of 4)	0	27.555	21	3	9	3	130	13.6	4.7	21.09	3	0	1.222	0.892532	19.54	76.3	123.7	8.11	2.1	High	High	High	High	High	High	1		3	3	Present Both	1	GLYMA_02G160500	GLYMA_02G160500	sp|O82089|CCH_ARATH	Copper transport protein CCH GN=CCH	ident:56/130 pos:62/130 query:130 hit:121 align:66 bit:125.2	Poor_match	Copper transport protein CCH	Copper chaperone CCH	CCH_ARATH	O82089	na	CCH	na	Arabidopsis thaliana (Mouse-ear cress)	3702
High	Master Protein	GLYMA_02G258800.2.p	K07342 - protein transport protein SEC61 subunit gamma and related proteins (SEC61G, SSS1, secE) (1 of 4)	0	15.2	23	1	4	1	69	7.7	9.72	18.73	1	0	1.107	0.946309	2.1	94.9	105.1		2	High	High	Not Found	High	Not Found	High	1	Acetyl [N-Term]	2	2	Present Both	1	GLYMA_02G258800.2.p	GLYMA_02G258800.2.p	sp|P0DI75|S61G2_ARATH	Protein transport protein Sec61 subunit gamma-2 GN=SEC61G2	ident:62/69 pos:67/69 query:69 hit:69 align:68 bit:127.5	OK	Protein transport protein Sec61 subunit gamma-2	na	S61G2_ARATH	P0DI75	Q9SW34	SEC61G2	na	Arabidopsis thaliana (Mouse-ear cress)	3702
High	Master Protein	GLYMA_01G030600	K07466 - replication factor A1 (RFA1, RPA1, rpa) (1 of 23)	0	58.442	29	3	30	1	137	15.2	7.2	113.38	3	0	0.675	0.804361	29.26	122.7	77.3	58.27	28.26	High	High	Peak Found	High	High	High	1		3	3	Present Both	1	GLYMA_01G030600	GLYMA_01G030600	sp|O49453|Y4844_ARATH	Uncharacterized protein At4g28440 GN=CBSDUF1	ident:89/137 pos:106/137 query:137 hit:153 align:132 bit:186.0	OK	Uncharacterized protein At4g28440	na	Y4844_ARATH	O49453	na	OrderedLocusNames=At4g28440	na	Arabidopsis thaliana (Mouse-ear cress)	3702
High	Master Protein	GLYMA_02G034800	K07466 - replication factor A1 (RFA1, RPA1, rpa) (1 of 23)	0	47.012	29	4	25	1	137	15.2	8.69	71.48	4	1	0.418	0.16289	4.32	148.1	51.9	70.71	18.26	High	High	Not Found	Peak Found	Not Found	Not Found	1		2	1	Only Control	1	GLYMA_02G034800	GLYMA_02G034800	sp|O49453|Y4844_ARATH	Uncharacterized protein At4g28440 GN=CBSDUF1	ident:90/137 pos:106/137 query:137 hit:153 align:132 bit:189.1	OK	Uncharacterized protein At4g28440	na	Y4844_ARATH	O49453	na	OrderedLocusNames=At4g28440	na	Arabidopsis thaliana (Mouse-ear cress)	3702
High	Master Protein	GLYMA_05G064300	K07874 - Ras-related protein Rab-1A (RAB1A) (1 of 7)	0	49.904	45	7	24	2	202	22.6	5.71	44.42	7	3	0.502	0.366835	14.91	129.7	70.3	48.88	50.52	High	High	High	High	High	High	1	Acetyl [N-Term]	3	3	Present Both	1	GLYMA_05G064300	GLYMA_05G064300	sp|Q9SEH3|RAD2C_ARATH	Ras-related protein RABD2c GN=RABD2C	ident:183/202 pos:192/202 query:202 hit:202 align:202 bit:390.6	OK	Ras-related protein RABD2c (AtRABD2c)	Ras-related protein Rab1C (AtRab1C)	RAD2C_ARATH	Q9SEH3	O23594; Q8W4S8	RABD2C	RAB1C	Arabidopsis thaliana (Mouse-ear cress)	3702
High	Master Protein	GLYMA_18G251300	K07874 - Ras-related protein Rab-1A (RAB1A) (1 of 7)	0	34.647	36	6	17	1	202	22.4	5.16	34.33	6	0	0.751	0.892532	57.38	114.2	85.8	49.71	78.77	High	High	High	High	High	Peak Found	1	Acetyl [N-Term]	3	3	Present Both	1	GLYMA_18G251300	GLYMA_18G251300	sp|P28188|RAD2A_ARATH	Ras-related protein RABD2a GN=RABD2A	ident:191/202 pos:197/202 query:202 hit:203 align:203 bit:399.4	OK	Ras-related protein RABD2a (AtRABD2a)	Ras-related protein Ara-5; Ras-related protein Rab1B (AtRab1B)	RAD2A_ARATH	P28188	Q940Z7	RABD2A	ARA-5; RAB1B	Arabidopsis thaliana (Mouse-ear cress)	3702
High	Master Protein	GLYMA_13G153000	K07889 - Ras-related protein Rab-5C (RAB5C) (1 of 3)	0	31.566	30	4	15	4	233	25.6	7.3	45.89	4	0	0.851	0.967731	38.88	107	93	52.8	23.18	High	High	High	High	High	High	1		3	3	Present Both	1	GLYMA_13G153000	GLYMA_13G153000	sp|P31582|RAF2A_ARATH	Ras-related protein RABF2a GN=RABF2A	ident:155/233 pos:168/233 query:233 hit:200 align:187 bit:326.2	OK	Ras-related protein RABF2a (AtRABF2a)	Ras-related protein Rab5A (AtRab5A); Ras-related protein Rha1	RAF2A_ARATH	P31582	na	RABF2A	RAB5A; RHA1	Arabidopsis thaliana (Mouse-ear cress)	3702
High	Master Protein	GLYMA_18G287600	K07901 - Ras-related protein Rab-8A (RAB8A, MEL) (1 of 8)	0	100.454	45	10	34	1	216	23.9	7.83	99.29	10	0	1.179	0.919239	83.88	101.1	98.9	56.15	79.68	High	High	Peak Found	High	High	High	1		3	3	Present Both	1	GLYMA_18G287600	GLYMA_18G287600	sp|P28186|RAE1C_ARATH	Ras-related protein RABE1c GN=RABE1C	ident:191/216 pos:198/216 query:216 hit:216 align:206 bit:397.5	OK	Ras-related protein RABE1c (AtRABE1c)	Ras-related protein Ara-3; Ras-related protein Rab8A (AtRab8A)	RAE1C_ARATH	P28186	na	RABE1C	ARA-3; RAB8A	Arabidopsis thaliana (Mouse-ear cress)	3702
High	Master Protein	GLYMA_02G094100	K07901 - Ras-related protein Rab-8A (RAB8A, MEL) (1 of 8)	0	95.166	45	10	33	1	216	23.9	7.83	92.05	10	9	0.958	1	53.08	102.5	97.5	21.11	41.74	High	High	Not Found	High	High	Peak Found	1		2	3	Present Both	1	GLYMA_02G094100	GLYMA_02G094100	sp|P28186|RAE1C_ARATH	Ras-related protein RABE1c GN=RABE1C	ident:192/216 pos:199/216 query:216 hit:216 align:206 bit:399.8	OK	Ras-related protein RABE1c (AtRABE1c)	Ras-related protein Ara-3; Ras-related protein Rab8A (AtRab8A)	RAE1C_ARATH	P28186	na	RABE1C	ARA-3; RAB8A	Arabidopsis thaliana (Mouse-ear cress)	3702
High	Master Protein	GLYMA_20G099300.3.p	K07901 - Ras-related protein Rab-8A (RAB8A, MEL) (1 of 8)	0	89.212	45	10	35	1	216	23.9	7.83	101.87	10	0	2.093	0.207977	3.08	64.7	135.3	70.59		High	High	Peak Found	High	High	High	1		3	3	Present Both	1	GLYMA_20G099300.3.p	GLYMA_20G099300.3.p	sp|P28186|RAE1C_ARATH	Ras-related protein RABE1c GN=RABE1C	ident:191/216 pos:197/216 query:216 hit:216 align:206 bit:399.1	OK	Ras-related protein RABE1c (AtRABE1c)	Ras-related protein Ara-3; Ras-related protein Rab8A (AtRab8A)	RAE1C_ARATH	P28186	na	RABE1C	ARA-3; RAB8A	Arabidopsis thaliana (Mouse-ear cress)	3702
High	Master Protein	GLYMA_10G290000	K07901 - Ras-related protein Rab-8A (RAB8A, MEL) (1 of 8)	0	85.946	45	10	34	1	216	23.9	7.83	95.58	10	1	1.412	0.747331	31.04	135.5	64.5	55.68	82.1	High	High	Not Found	High	High	High	1		2	3	Present Both	1	GLYMA_10G290000	GLYMA_10G290000	sp|P28186|RAE1C_ARATH	Ras-related protein RABE1c GN=RABE1C	ident:193/216 pos:199/216 query:216 hit:216 align:206 bit:402.9	OK	Ras-related protein RABE1c (AtRABE1c)	Ras-related protein Ara-3; Ras-related protein Rab8A (AtRab8A)	RAE1C_ARATH	P28186	na	RABE1C	ARA-3; RAB8A	Arabidopsis thaliana (Mouse-ear cress)	3702
High	Master Protein	GLYMA_11G142300	K07901 - Ras-related protein Rab-8A (RAB8A, MEL) (1 of 8)	0	60.883	32	8	23	1	214	23.6	7.83	51.91	8	0	0.874	0.976873	65.83	94.1	105.9	94.69	27.46	High	High	Peak Found	High	High	Peak Found	1		3	3	Present Both	1	GLYMA_11G142300	GLYMA_11G142300	sp|P28186|RAE1C_ARATH	Ras-related protein RABE1c GN=RABE1C	ident:194/214 pos:201/214 query:214 hit:216 align:205 bit:400.2	OK	Ras-related protein RABE1c (AtRABE1c)	Ras-related protein Ara-3; Ras-related protein Rab8A (AtRab8A)	RAE1C_ARATH	P28186	na	RABE1C	ARA-3; RAB8A	Arabidopsis thaliana (Mouse-ear cress)	3702
High	Master Protein	GLYMA_05G176300	K07904 - Ras-related protein Rab-11A (RAB11A) (1 of 40)	0	24.692	16	3	16	1	229	25.2	5.99	38.13	3	0	1.502	0.642895	58.22	64.7	135.3	44.85	25.81	High	High	Peak Found	High	High	High	1		3	3	Present Both	1	GLYMA_05G176300	GLYMA_05G176300	sp|Q9FJN8|RAA4A_ARATH	Ras-related protein RABA4a GN=RABA4A	ident:188/229 pos:204/229 query:229 hit:226 align:224 bit:391.7	OK	Ras-related protein RABA4a (AtRABA4a)	na	RAA4A_ARATH	Q9FJN8	na	RABA4A	na	Arabidopsis thaliana (Mouse-ear cress)	3702
High	Master Protein	GLYMA_04G069200	K07936 - GTP-binding nuclear protein Ran (RAN) (1 of 7)	0	31.203	12	3	19	3	290	33.1	8.41	45.99	3	0	0.808	0.936331	18.52	97	103	28.02	16.68	High	High	High	High	High	High	1		3	3	Present Both	1	GLYMA_04G069200	GLYMA_04G069200	sp|Q8H156|RAN3_ARATH	GTP-binding nuclear protein Ran-3 GN=RAN3	ident:217/290 pos:219/290 query:290 hit:221 align:221 bit:461.1	OK	GTP-binding nuclear protein Ran-3	Ras-related nuclear protein 3	RAN3_ARATH	Q8H156	O04148; O04664; O22495	RAN3	na	Arabidopsis thaliana (Mouse-ear cress)	3702
High	Master Protein	GLYMA_02G009600	K07937//K07977 - ADP-ribosylation factor 1 (ARF1) // Arf/Sar family, other (ARF) (1 of 11)	0	19.308	23	4	7	4	223	25.7	8.38	17.37	4	0	0.538	0.455145	18.23	62.6	137.4	82.13	28.4	High	High	High	Peak Found	High	High	1		3	3	Present Both	1	GLYMA_02G009600	GLYMA_02G009600	sp|Q9LQC8|ARF2A_ARATH	ADP-ribosylation factor 2-A GN=ARF2-A	ident:178/223 pos:178/223 query:223 hit:181 align:181 bit:370.2	OK	ADP-ribosylation factor 2-A (AtARF2)	na	ARF2A_ARATH	Q9LQC8	Q9S9K6; Q9SGY6; Q9SRC3	ARF2-A	ARFA1-A; ARFA2-A	Arabidopsis thaliana (Mouse-ear cress)	3702
High	Master Protein	GLYMA_04G202900	K08054 - calnexin (CANX) (1 of 3)	0	51.051	16	8	23	2	579	66.1	4.89	56.69	8	3	0.939	0.999223	73.13	125.3	74.7	42.46	79.27	High	High	Not Found	High	High	Not Found	1		2	2	Present Both	1	GLYMA_04G202900	GLYMA_04G202900	sp|P29402|CALX1_ARATH	Calnexin homolog 1 GN=CNX1	ident:404/579 pos:462/579 query:579 hit:530 align:569 bit:789.6	OK	Calnexin homolog 1	na	CALX1_ARATH	P29402	na	CNX1	na	Arabidopsis thaliana (Mouse-ear cress)	3702
High	Master Protein	GLYMA_05G199200	K08054 - calnexin (CANX) (1 of 3)	0	23.278	7	4	14	2	541	61.6	4.91	23.97	4	0	0.403	0.134708	8.2	153.9	46.1	65.04	60.39	High	High	Peak Found	Peak Found	High	High	1		3	3	Present Both	1	GLYMA_05G199200	GLYMA_05G199200	sp|P29402|CALX1_ARATH	Calnexin homolog 1 GN=CNX1	ident:392/541 pos:454/541 query:541 hit:530 align:531 bit:781.9	OK	Calnexin homolog 1	na	CALX1_ARATH	P29402	na	CNX1	na	Arabidopsis thaliana (Mouse-ear cress)	3702
High	Master Protein	GLYMA_14G005700	K08243 - Polyketide reductase (PKR) (1 of 2)	0	8.154	10	2	5	2	301	33.8	7.06	7.46	2	0	0.694	0.831963	14.67	93	107	30.15	2.22	High	High	Peak Found	Peak Found	High	Peak Found	1		3	3	Present Both	1	GLYMA_14G005700	GLYMA_14G005700	sp|Q0PGJ6|AKRC9_ARATH	NADPH-dependent aldo-keto reductase, chloroplastic GN=AKR4C9	ident:125/301 pos:186/301 query:301 hit:315 align:319 bit:214.5	Poor_match	NADPH-dependent aldo-keto reductase, chloroplastic (AtChlAKR)	Aldo-keto reductase family 4 member C9	AKRC9_ARATH	Q0PGJ6	O80945; Q2V420; Q84W94	AKR4C9	na	Arabidopsis thaliana (Mouse-ear cress)	3702
High	Master Protein	GLYMA_16G075400	K08488 - syntaxin 7 (STX7) (1 of 6)	0	143.773	46	14	51	6	273	30	6.32	151.04	14	7	1.021	0.987173	64.44	106	94	46.29	12.87	High	High	High	High	High	High	1		3	3	Present Both	1	GLYMA_16G075400	GLYMA_16G075400	sp|P93654|SYP22_ARATH	Syntaxin-22 GN=SYP22	ident:206/273 pos:232/273 query:273 hit:268 align:261 bit:417.9	OK	Syntaxin-22 (AtSYP22; AtVAM3)	Protein SHOOT GRAVITROPISM 3	SYP22_ARATH	P93654	na	SYP22	SGR3; VAM3	Arabidopsis thaliana (Mouse-ear cress)	3702
High	Master Protein	GLYMA_09G206800	K08488 - syntaxin 7 (STX7) (1 of 6)	0	128.833	34	13	45	5	273	30	6.32	118.79	13	0	1.042	0.978903	39.71	97.6	102.4	50.87	18.44	High	High	Peak Found	High	High	High	1		3	3	Present Both	1	GLYMA_09G206800	GLYMA_09G206800	sp|P93654|SYP22_ARATH	Syntaxin-22 GN=SYP22	ident:203/273 pos:228/273 query:273 hit:268 align:261 bit:410.2	OK	Syntaxin-22 (AtSYP22; AtVAM3)	Protein SHOOT GRAVITROPISM 3	SYP22_ARATH	P93654	na	SYP22	SGR3; VAM3	Arabidopsis thaliana (Mouse-ear cress)	3702
High	Master Protein	GLYMA_10G149000	K08489 - syntaxin 16 (STX16) (1 of 4)	0	9.193	4	1	4	1	326	36.3	8.81	5.36	1	0	0.614	0.649229	10.18	123.9	76.1	25.83	2.91	High	High	Peak Found	High	Not Found	High	1		3	2	Present Both	1	GLYMA_10G149000	GLYMA_10G149000	sp|Q9SUJ1|SYP43_ARATH	Syntaxin-43 GN=SYP43	ident:256/326 pos:293/326 query:326 hit:331 align:335 bit:516.2	OK	Syntaxin-43 (AtSYP43)	na	SYP43_ARATH	Q9SUJ1	Q8L7J6; Q9M9X6	SYP43	na	Arabidopsis thaliana (Mouse-ear cress)	3702
High	Master Protein	GLYMA_04G072800	K08490 - syntaxin 5 (STX5) (1 of 5)	0	20.983	10	4	9	2	339	37.5	8.87	18.38	4	2	0.734	0.870366	35.02	120.5	79.5	70.8	10.03	High	High	Peak Found	High	Peak Found	Peak Found	1		3	3	Present Both	1	GLYMA_04G072800	GLYMA_04G072800	sp|Q9LK09|SYP32_ARATH	Syntaxin-32 GN=SYP32	ident:243/339 pos:282/339 query:339 hit:347 align:349 bit:439.1	OK	Syntaxin-32 (AtSYP32)	na	SYP32_ARATH	Q9LK09	na	SYP32	na	Arabidopsis thaliana (Mouse-ear cress)	3702
High	Master Protein	GLYMA_06G073900	K08490 - syntaxin 5 (STX5) (1 of 5)	0	18.259	10	4	8	2	336	37.3	9.07	20.42	4	0	1.295	0.844775	49.37	92.3	107.7	81.7	32.26	High	High	Peak Found	High	Peak Found	High	1		3	3	Present Both	1	GLYMA_06G073900	GLYMA_06G073900	sp|Q9LK09|SYP32_ARATH	Syntaxin-32 GN=SYP32	ident:235/336 pos:278/336 query:336 hit:347 align:349 bit:428.7	OK	Syntaxin-32 (AtSYP32)	na	SYP32_ARATH	Q9LK09	na	SYP32	na	Arabidopsis thaliana (Mouse-ear cress)	3702
High	Master Protein	GLYMA_01G137300	K08495 - golgi SNAP receptor complex member 1 (GOSR1, GOS1) (1 of 3)	0.001	3.033	4	1	3	1	243	27.1	9.54	6.06	1	0	0.668	0.790446	10.04	119.9	80.1	7.53	22.35	High	High	Not Found	Not Found	High	Peak Found	1		2	2	Present Both	1	GLYMA_01G137300	GLYMA_01G137300	sp|O22151|GOS12_ARATH	Golgi SNAP receptor complex member 1-2 GN=GOS12	ident:210/243 pos:230/243 query:243 hit:257 align:257 bit:427.2	OK	Golgi SNAP receptor complex member 1-2	Golgi SNARE 12 protein (AtGOS12)	GOS12_ARATH	O22151	F4IW37; Q2HIF8	GOS12	na	Arabidopsis thaliana (Mouse-ear cress)	3702
High	Master Protein	GLYMA_18G089600	K08503 - syntaxin of plants SYP5 (SYP5) (1 of 3)	0	78.366	37	9	38	1	251	28.1	8.9	89.95	9	0	0.705	0.839724	34.63	132.7	67.3	46.82	76.54	High	High	Peak Found	Peak Found	High	Peak Found	1		3	3	Present Both	1	GLYMA_18G089600	GLYMA_18G089600	sp|Q9SA23|SYP51_ARATH	Syntaxin-51 GN=SYP51	ident:168/251 pos:201/251 query:251 hit:232 align:232 bit:349.4	OK	Syntaxin-51 (AtSYP51)	na	SYP51_ARATH	Q9SA23	na	SYP51	na	Arabidopsis thaliana (Mouse-ear cress)	3702
High	Master Protein	GLYMA_13G138900.2.p	K08506 - syntaxin of plants SYP7 (SYP7) (1 of 6)	0	105.469	38	12	55	8	265	29.8	6.19	146.13	12	4	1.033	0.983811	72.14	138.7	61.3	39.54	71.06	High	High	High	High	High	High	1		3	3	Present Both	1	GLYMA_13G138900.2.p	GLYMA_13G138900.2.p	sp|Q9SF29|SYP71_ARATH	Syntaxin-71 GN=SYP71	ident:208/265 pos:237/265 query:265 hit:266 align:266 bit:432.9	OK	Syntaxin-71 (AtSYP71)	na	SYP71_ARATH	Q9SF29	na	SYP71	na	Arabidopsis thaliana (Mouse-ear cress)	3702
High	Master Protein	GLYMA_19G180200	K08506 - syntaxin of plants SYP7 (SYP7) (1 of 6)	0	71.26	31	9	45	2	265	29.9	5.71	116.74	9	3	0.847	0.963111	43	144.2	55.8	54.1	68.14	High	High	Peak Found	High	High	High	1		3	3	Present Both	1	GLYMA_19G180200	GLYMA_19G180200	sp|Q9SF29|SYP71_ARATH	Syntaxin-71 GN=SYP71	ident:204/265 pos:236/265 query:265 hit:266 align:266 bit:428.7	OK	Syntaxin-71 (AtSYP71)	na	SYP71_ARATH	Q9SF29	na	SYP71	na	Arabidopsis thaliana (Mouse-ear cress)	3702
High	Master Protein	GLYMA_14G035500	K08515 - vesicle-associated membrane protein 7 (VAMP7) (1 of 6)	0	47.882	32	4	16	4	219	25	9.42	66.45	4	0	1.071	0.974149	24.97	81	119	20.13	5.61	High	High	High	High	High	High	1		3	3	Present Both	1	GLYMA_14G035500	GLYMA_14G035500	sp|Q9LFP1|VA713_ARATH	Vesicle-associated membrane protein 713 GN=VAMP713	ident:175/219 pos:207/219 query:219 hit:221 align:220 bit:390.2	OK	Vesicle-associated membrane protein 713 (AtVAMP713)	na	VA713_ARATH	Q9LFP1	na	VAMP713	na	Arabidopsis thaliana (Mouse-ear cress)	3702
High	Master Protein	GLYMA_09G246700	K08738 - cytochrome c (CYC) (1 of 4)	0	21.226	34	4	11	4	112	12.3	9.31	25.08	4	0	1.097	0.951285	46.19	81.7	118.3	28.09	7.77	High	High	Peak Found	High	High	High	1		3	3	Present Both	1	GLYMA_09G246700	GLYMA_09G246700	sp|Q9T0G2|CYC2_ARATH	Cytochrome c-2 GN=CYTC-2	ident:103/112 pos:107/112 query:112 hit:112 align:112 bit:217.2	OK	Cytochrome c-2	Cytochrome c At4g10040	CYC2_ARATH	Q9T0G2	na	CYTC-2	na	Arabidopsis thaliana (Mouse-ear cress)	3702
High	Master Protein	GLYMA_04G122900	K08762 - diazepam-binding inhibitor (GABA receptor modulator, acyl-CoA-binding protein) (DBI, ACBP) (1 of 2)	0	42.914	57	4	23	1	90	10.2	5.49	62.9	4	4	0.866	0.976873	32.04	113	87	39.76	39.33	High	High	Peak Found	High	Peak Found	High	1		3	3	Present Both	1	GLYMA_04G122900	GLYMA_04G122900	sp|P57752|ACBP6_ARATH	Acyl-CoA-binding domain-containing protein 6 GN=ACBP6	ident:65/90 pos:76/90 query:90 hit:92 align:90 bit:137.9	OK	Acyl-CoA-binding domain-containing protein 6 (Acyl-CoA binding protein 6)	Acyl-CoA-binding protein (ACBP)	ACBP6_ARATH	P57752	Q8L9P1	ACBP6	na	Arabidopsis thaliana (Mouse-ear cress)	3702
High	Master Protein	GLYMA_09G214500	K08762 - diazepam-binding inhibitor (GABA receptor modulator, acyl-CoA-binding protein) (DBI, ACBP) (1 of 2)	0	36.493	57	4	21	1	90	10.1	5.19	56.25	4	0	0.906	0.99265	11.44	104.9	95.1	3	22.04	High	Peak Found	Not Found	High	Peak Found	High	1		2	3	Present Both	1	GLYMA_09G214500	GLYMA_09G214500	sp|P57752|ACBP6_ARATH	Acyl-CoA-binding domain-containing protein 6 GN=ACBP6	ident:64/90 pos:74/90 query:90 hit:92 align:90 bit:135.6	OK	Acyl-CoA-binding domain-containing protein 6 (Acyl-CoA binding protein 6)	Acyl-CoA-binding protein (ACBP)	ACBP6_ARATH	P57752	Q8L9P1	ACBP6	na	Arabidopsis thaliana (Mouse-ear cress)	3702
High	Master Protein	GLYMA_17G228100	K08955 - ATP-dependent metalloprotease [EC:3.4.24.-] (YME1) (1 of 5)	0	38.017	10	4	10	2	714	77.3	8.75	30.12	4	1	0.809	0.938176	35.19	110.5	89.5	10.11	36.68	High	High	Not Found	Not Found	Not Found	Not Found	1		2	0	Only Control	1	GLYMA_17G228100	GLYMA_17G228100	sp|O80983|FTSH4_ARATH	ATP-dependent zinc metalloprotease FTSH 4, mitochondrial GN=FTSH4	ident:512/714 pos:588/714 query:714 hit:717 align:670 bit:1025.0	OK	ATP-dependent zinc metalloprotease FTSH 4, mitochondrial (AtFTSH4)	na	FTSH4_ARATH	O80983	Q56ZW8	FTSH4	na	Arabidopsis thaliana (Mouse-ear cress)	3702
High	Master Protein	GLYMA_07G089600	K09313 - homeobox protein cut-like (CUTL) (1 of 2)	0	143.628	25	18	80	2	690	79.5	5.34	171.89	18	14	0.693	0.831431	30.43	148	52	50.37	56.94	High	High	Not Found	High	High	High	1	Acetyl [N-Term]	2	3	Present Both	1	GLYMA_07G089600	GLYMA_07G089600	sp|Q9LS42|CASP_ARATH	Protein CASP GN=CASP	ident:560/690 pos:622/690 query:690 hit:689 align:694 bit:1115.9	OK	Protein CASP	na	CASP_ARATH	Q9LS42	Q93ZW7	CASP	na	Arabidopsis thaliana (Mouse-ear cress)	3702
High	Master Protein	GLYMA_20G065900	K09486 - hypoxia up-regulated 1 (HYOU1) (1 of 2)	0	17.557	3	3	4	3	893	98.9	5.71	7.86	3	0	1.261	0.870366	8	86.9	113.1	11.04		High	High	Not Found	Not Found	High	Not Found	1		2	1	Only Control	1	GLYMA_20G065900	GLYMA_20G065900	sp|F4JMJ1|HSP7R_ARATH	Heat shock 70 kDa protein 17 GN=HSP70-17	ident:580/893 pos:708/893 query:893 hit:867 align:839 bit:1218.8	OK	Heat shock 70 kDa protein 17	Heat shock protein 70-17 (AtHsp70-17)	HSP7R_ARATH	F4JMJ1	O23509; Q0WM51; Q949M5	HSP70-17	na	Arabidopsis thaliana (Mouse-ear cress)	3702
High	Master Protein	GLYMA_14G007700	K09487 - heat shock protein 90kDa beta (HSP90B, TRA1) (1 of 6)	0	66.068	8	6	20	3	797	90.4	5.26	59.3	6	0	0.858	0.974149	16.3	105.5	94.5		4.96	High	High	High	High	High	High	1		3	3	Present Both	1	GLYMA_14G007700	GLYMA_14G007700	sp|F4JFN3|HS906_ARATH	Heat shock protein 90-6, mitochondrial GN=HSP90-6	ident:619/797 pos:705/797 query:797 hit:799 align:810 bit:1208.7	OK	Heat shock protein 90-6, mitochondrial (AtHSP90.6; AtHsp90-6)	Heat shock protein 89-1 (Hsp89-1)	HS906_ARATH	F4JFN3	A0A1I9LN11; Q0WRS4; Q9S7E7	HSP90-6	na	Arabidopsis thaliana (Mouse-ear cress)	3702
High	Master Protein	GLYMA_08G025700	K09490 - heat shock 70kDa protein 5 (HSPA5, BIP) (1 of 4)	0	408.165	47	34	208	4	667	73.4	5.19	632.39	34	0	0.7	0.834549	36.83	128	72	61.84	78.98	High	High	Peak Found	High	High	High	1		3	3	Present Both	1	GLYMA_08G025700	GLYMA_08G025700	sp|Q39043|MD37F_ARATH	Mediator of RNA polymerase II transcription subunit 37f GN=MED37F	ident:613/667 pos:640/667 query:667 hit:668 align:668 bit:1239.2	OK	Mediator of RNA polymerase II transcription subunit 37f	Heat shock 70 kDa protein 12; Heat shock protein 70-12 (AtHsp70-12); Luminal-binding protein 2 (AtBP2; BiP2)	MD37F_ARATH	Q39043	Q39042	MED37F	BIP; BIP2; HSP70-11; MED37_6	Arabidopsis thaliana (Mouse-ear cress)	3702
High	Master Protein	GLYMA_05G219400	K09490 - heat shock 70kDa protein 5 (HSPA5, BIP) (1 of 4)	0	407.147	50	36	217	1	668	73.6	5.19	655.83	36	1	0.768	0.906252	58.86	102.2	97.8	91.82	41.06	High	High	Peak Found	High	High	High	1		3	3	Present Both	1	GLYMA_05G219400	GLYMA_05G219400	sp|Q39043|MD37F_ARATH	Mediator of RNA polymerase II transcription subunit 37f GN=MED37F	ident:613/668 pos:642/668 query:668 hit:668 align:668 bit:1242.6	OK	Mediator of RNA polymerase II transcription subunit 37f	Heat shock 70 kDa protein 12; Heat shock protein 70-12 (AtHsp70-12); Luminal-binding protein 2 (AtBP2; BiP2)	MD37F_ARATH	Q39043	Q39042	MED37F	BIP; BIP2; HSP70-11; MED37_6	Arabidopsis thaliana (Mouse-ear cress)	3702
High	Master Protein	GLYMA_05G219600	K09490 - heat shock 70kDa protein 5 (HSPA5, BIP) (1 of 4)	0	403.622	47	36	215	1	701	77.6	5.62	641.87	36	37	0.737	0.874733	46.49	139.5	60.5	39.15	71.4	High	High	Not Found	High	High	High	1		2	3	Present Both	1	GLYMA_05G219600	GLYMA_05G219600	sp|Q39043|MD37F_ARATH	Mediator of RNA polymerase II transcription subunit 37f GN=MED37F	ident:607/701 pos:637/701 query:701 hit:668 align:668 bit:1227.2	OK	Mediator of RNA polymerase II transcription subunit 37f	Heat shock 70 kDa protein 12; Heat shock protein 70-12 (AtHsp70-12); Luminal-binding protein 2 (AtBP2; BiP2)	MD37F_ARATH	Q39043	Q39042	MED37F	BIP; BIP2; HSP70-11; MED37_6	Arabidopsis thaliana (Mouse-ear cress)	3702
High	Master Protein	GLYMA_08G025900	K09490 - heat shock 70kDa protein 5 (HSPA5, BIP) (1 of 4)	0	350.881	42	32	184	2	708	78	5.24	544.4	32	0	1.254	0.870366	52.14	88.7	111.3		46.91	High	Peak Found	Not Found	High	High	High	1		2	3	Present Both	1	GLYMA_08G025900	GLYMA_08G025900	sp|Q39043|MD37F_ARATH	Mediator of RNA polymerase II transcription subunit 37f GN=MED37F	ident:605/708 pos:639/708 query:708 hit:668 align:669 bit:1224.5	OK	Mediator of RNA polymerase II transcription subunit 37f	Heat shock 70 kDa protein 12; Heat shock protein 70-12 (AtHsp70-12); Luminal-binding protein 2 (AtBP2; BiP2)	MD37F_ARATH	Q39043	Q39042	MED37F	BIP; BIP2; HSP70-11; MED37_6	Arabidopsis thaliana (Mouse-ear cress)	3702
High	Master Protein	GLYMA_11G185500	K09494 - T-complex protein 1 subunit beta (CCT2) (1 of 2)	0	68.803	14	6	24	6	527	57	5.8	57.72	6	0	1.149	0.93045	40.79	87.3	112.7	18.97	9.68	High	High	High	High	High	High	1		3	3	Present Both	1	GLYMA_11G185500	GLYMA_11G185500	sp|Q940P8|TCPB_ARATH	T-complex protein 1 subunit beta GN=CCT2	ident:468/527 pos:501/527 query:527 hit:527 align:527 bit:940.6	OK	T-complex protein 1 subunit beta (TCP-1-beta)	CCT-beta; Chaperonin CCT2	TCPB_ARATH	Q940P8	na	CCT2	na	Arabidopsis thaliana (Mouse-ear cress)	3702
High	Master Protein	GLYMA_16G208700	K09495 - T-complex protein 1 subunit gamma (CCT3, TRIC5) (1 of 5)	0	46.51	10	3	12	1	554	60.2	6.18	43.36	3	0	2.039	0.235782	69.06	65.8	134.2	95.03	22.04	High	High	High	High	High	High	1		3	3	Present Both	1	GLYMA_16G208700	GLYMA_16G208700	sp|Q84WV1|TCPG_ARATH	T-complex protein 1 subunit gamma GN=CCT3	ident:486/554 pos:523/554 query:554 hit:555 align:555 bit:987.3	OK	T-complex protein 1 subunit gamma (TCP-1-gamma)	CCT-gamma; Chaperonin CCT3	TCPG_ARATH	Q84WV1	O81503	CCT3	na	Arabidopsis thaliana (Mouse-ear cress)	3702
High	Master Protein	GLYMA_08G364000	K09498 - T-complex protein 1 subunit zeta (CCT6) (1 of 3)	0	148.685	26	11	48	11	535	58.9	5.85	162.06	11	0	1.176	0.919239	43.47	72.2	127.8	29.6	9.06	High	High	High	High	High	High	1		3	3	Present Both	1	GLYMA_08G364000	GLYMA_08G364000	sp|Q9M888|TCPZA_ARATH	T-complex protein 1 subunit zeta 1 GN=CCT6A	ident:483/535 pos:516/535 query:535 hit:535 align:535 bit:1007.3	OK	T-complex protein 1 subunit zeta 1 (TCP-1-zeta 1)	CCT-zeta 1; Chaperonin CCT6A	TCPZA_ARATH	Q9M888	Q8LFN3; Q94EZ9	CCT6A	na	Arabidopsis thaliana (Mouse-ear cress)	3702
High	Master Protein	GLYMA_02G071900	K09500 - T-complex protein 1 subunit theta (CCT8) (1 of 2)	0	28.258	11	3	5	3	545	58.6	5.4	16.84	3	0	0.841	0.957893	36.64	126.8	73.2	2.43	61.84	High	Peak Found	Peak Found	High	High	High	1		3	3	Present Both	1	GLYMA_02G071900	GLYMA_02G071900	sp|Q94K05|TCPQ_ARATH	T-complex protein 1 subunit theta GN=CCT8	ident:445/545 pos:503/545 query:545 hit:549 align:536 bit:944.1	OK	T-complex protein 1 subunit theta (TCP-1-theta)	CCT-theta; Chaperonin CCT8; Chaperonin containing TCP1 8; TCP1-ring complex	TCPQ_ARATH	Q94K05	Q9SQR6	CCT8	na	Arabidopsis thaliana (Mouse-ear cress)	3702
High	Master Protein	GLYMA_12G190100	K09503 - DnaJ homolog subfamily A member 2 (DNAJA2) (1 of 6)	0	43.899	12	6	14	2	417	46.3	6.3	48.47	6	4	1.125	0.940144	55.11	72.8	127.2	57.27	38.31	High	Not Found	Peak Found	High	Not Found	High	1		2	2	Present Both	1	GLYMA_12G190100	GLYMA_12G190100	sp|P42825|DNAJ2_ARATH	Chaperone protein dnaJ 2 GN=ATJ2	ident:341/417 pos:379/417 query:417 hit:419 align:421 bit:661.0	OK	Chaperone protein dnaJ 2 (AtDjA2)	na	DNAJ2_ARATH	P42825	Q43293; Q9C582	ATJ2	A2; ATJ	Arabidopsis thaliana (Mouse-ear cress)	3702
High	Master Protein	GLYMA_03G218300	K09517 - DnaJ homolog subfamily B member 11 (DNAJB11) (1 of 3)	0	28.283	14	4	13	4	343	38.8	6.74	36.94	4	0	0.7	0.834549	26.16	104.3	95.7	14.07	13.88	High	High	Peak Found	High	High	High	1		3	3	Present Both	1	GLYMA_03G218300	GLYMA_03G218300	sp|Q9LZK5|DNJ19_ARATH	DnaJ protein ERDJ3B GN=ERDJ3B	ident:263/343 pos:308/343 query:343 hit:346 align:346 bit:548.1	OK	DnaJ protein ERDJ3B	Chaperone protein dnaJ 19 (AtDjB19; AtJ19); Endoplasmic reticulum dnaJ domain-containing protein 3B (AtERdj3B); Protein SCJ1 homolog ERDJ3B	DNJ19_ARATH	Q9LZK5	na	ERDJ3B	B19	Arabidopsis thaliana (Mouse-ear cress)	3702
High	Master Protein	GLYMA_11G030500	K09553 - stress-induced-phosphoprotein 1 (STIP1) (1 of 4)	0	222.602	39	16	62	6	585	65.5	6.67	190.88	16	0	0.769	0.906302	31.55	37.1	162.9	78.33	69.05	High	Peak Found	Peak Found	High	High	High	1		3	3	Present Both	1	GLYMA_11G030500	GLYMA_11G030500	sp|Q9STH1|HSOP3_ARATH	Hsp70-Hsp90 organizing protein 3 GN=HOP3	ident:428/585 pos:499/585 query:585 hit:558 align:586 bit:890.6	OK	Hsp70-Hsp90 organizing protein 3 (AtHop3)	na	HSOP3_ARATH	Q9STH1	B9DG66; F4JQM6; Q8L724	HOP3	na	Arabidopsis thaliana (Mouse-ear cress)	3702
High	Master Protein	GLYMA_01G062300	K09564 - peptidyl-prolyl isomerase E (cyclophilin E) (PPIE) (1 of 2)	0	19.485	22	3	10	3	172	19.5	4.65	27.53	3	0	1.051	0.976873	17.41	65.8	134.2	5.34	24.66	High	High	Peak Found	High	High	High	1		3	3	Present Both	1	GLYMA_01G062300	GLYMA_01G062300	sp|Q9FNR1|RBG3_ARATH	Glycine-rich RNA-binding protein 3, mitochondrial GN=RBG3	ident:33/172 pos:51/172 query:172 hit:309 align:75 bit:73.6	Partial_match_both	Glycine-rich RNA-binding protein 3, mitochondrial (AtGR-RBP3)	AtRBG3; Mitochondrial RNA-binding protein 2a (At-mRBP2a); Organelle RRM domain-containing protein 3	RBG3_ARATH	Q9FNR1	na	RBG3	na	Arabidopsis thaliana (Mouse-ear cress)	3702
High	Master Protein	GLYMA_03G086100	K09569 - FK506-binding protein 2 [EC:5.2.1.8] (FKBP2) (1 of 2)	0	57.248	46	5	26	2	147	16	6.79	87.62	5	3	0.589	0.582639	17.35	139.4	60.6	60.45	18.76	High	High	Peak Found	Peak Found	Peak Found	High	1		3	3	Present Both	1	GLYMA_03G086100	GLYMA_03G086100	sp|Q38936|FK152_ARATH	Peptidyl-prolyl cis-trans isomerase FKBP15-2 GN=FKBP15-2	ident:106/147 pos:120/147 query:147 hit:163 align:137 bit:223.0	OK	Peptidyl-prolyl cis-trans isomerase FKBP15-2 (PPIase FKBP15-2)	15 kDa FK506-binding protein (15 kDa FKBP); FK506-binding protein 15-2 (AtFKBP15-2); FK506-binding protein 2-2; Immunophilin FKBP15-2; Rotamase	FK152_ARATH	Q38936	Q9FJL2	FKBP15-2	na	Arabidopsis thaliana (Mouse-ear cress)	3702
High	Master Protein	GLYMA_02G014000.3.p	K09584 - protein disulfide-isomerase A6 (PDIA6, TXNDC7) (1 of 6)	0	198.706	45	20	91	6	364	40.4	5.59	258.51	20	10	0.827	0.94531	59.26	125.2	74.8	55.67	39.02	High	High	High	High	High	High	1		3	3	Present Both	1	GLYMA_02G014000.3.p	GLYMA_02G014000.3.p	sp|O22263|PDI21_ARATH	Protein disulfide-isomerase like 2-1 GN=PDIL2-1	ident:261/364 pos:296/364 query:364 hit:361 align:332 bit:550.4	OK	Protein disulfide-isomerase like 2-1 (AtPDIL2-1)	P5; Protein MATERNAL EFFECT EMBRYO ARREST 30; Protein UNFERTILIZED EMBRYO SAC 5; Protein disulfide isomerase 11 (AtPDI11); Protein disulfide-isomerase A6; Protein disulfide-isomerase like 4-1 (AtPDIL4-1)	PDI21_ARATH	O22263	Q546R3	PDIL2-1	MEE30; PDI11; PDIL4-1; UNE5	Arabidopsis thaliana (Mouse-ear cress)	3702
High	Master Protein	GLYMA_10G014700	K09584 - protein disulfide-isomerase A6 (PDIA6, TXNDC7) (1 of 6)	0	161.688	40	18	83	4	364	40.3	5.92	216.61	18	0	1.436	0.724352	70.57	71.2	128.8	64.88	51.04	High	High	High	High	High	High	1		3	3	Present Both	1	GLYMA_10G014700	GLYMA_10G014700	sp|O22263|PDI21_ARATH	Protein disulfide-isomerase like 2-1 GN=PDIL2-1	ident:262/364 pos:295/364 query:364 hit:361 align:332 bit:551.2	OK	Protein disulfide-isomerase like 2-1 (AtPDIL2-1)	P5; Protein MATERNAL EFFECT EMBRYO ARREST 30; Protein UNFERTILIZED EMBRYO SAC 5; Protein disulfide isomerase 11 (AtPDI11); Protein disulfide-isomerase A6; Protein disulfide-isomerase like 4-1 (AtPDIL4-1)	PDI21_ARATH	O22263	Q546R3	PDIL2-1	MEE30; PDI11; PDIL4-1; UNE5	Arabidopsis thaliana (Mouse-ear cress)	3702
High	Master Protein	GLYMA_19G126000	K09754 - coumaroylquinate(coumaroylshikimate) 3'-monooxygenase (CYP98A3, C3'H) (1 of 2)	0	9.06	4	2	7	2	509	57.6	8.38	14.52	2	0	0.62	0.665738	34.57	127.3	72.7	43.44	65.65	High	High	Peak Found	High	High	High	1		3	3	Present Both	1	GLYMA_19G126000	GLYMA_19G126000	sp|O22203|C98A3_ARATH	Cytochrome P450 98A3 GN=CYP98A3	ident:405/509 pos:456/509 query:509 hit:508 align:505 bit:877.1	OK	Cytochrome P450 98A3	Protein REDUCED EPIDERMAL FLUORESCENCE 8; p-coumaroylshikimate/quinate 3'-hydrolxylase (C3'H)	C98A3_ARATH	O22203	Q0WWH4; Q940C7	CYP98A3	C3'H; REF8	Arabidopsis thaliana (Mouse-ear cress)	3702
High	Master Protein	GLYMA_15G198100	K10088 - protein OS-9 (OS9) (1 of 2)	0	12.7	11	2	4	2	294	34	5.96	5.6	2	0	1.258	0.870366	59.8	94.5	105.5	20.52	35.19	High	High	Peak Found	High	High	Peak Found	1		3	3	Present Both	1	GLYMA_15G198100	GLYMA_15G198100	sp|Q8GWH3|OS9_ARATH	Protein OS-9 homolog GN=OS9	ident:162/294 pos:197/294 query:294 hit:282 align:264 bit:335.5	OK	Protein OS-9 homolog (AtOS9)	Protein EMS-MUTAGENIZED BRI1 SUPPRESSOR 6	OS9_ARATH	Q8GWH3	O65221; Q8LD14	OS9	na	Arabidopsis thaliana (Mouse-ear cress)	3702
High	Master Protein	GLYMA_02G273300.2.p	K10258 - very-long-chain enoyl-CoA reductase (TER, TSC13, CER10) (1 of 2)	0	15.169	13	3	7	3	309	35.9	9.54	13.72	3	0	0.527	0.424245	25.35	174.9	25.1	71.46	110.07	High	High	Peak Found	High	High	High	1		3	3	Present Both	1	GLYMA_02G273300.2.p	GLYMA_02G273300.2.p	sp|Q9M2U2|TECR_ARATH	Very-long-chain enoyl-CoA reductase GN=ECR	ident:252/309 pos:281/309 query:309 hit:310 align:310 bit:538.1	OK	Very-long-chain enoyl-CoA reductase	Enoyl-CoA reductase (AtECR); Protein ECERIFERUM 10; Synaptic glycoprotein SC2-like protein	TECR_ARATH	Q9M2U2	na	ECR	AtTSC13; CER10	Arabidopsis thaliana (Mouse-ear cress)	3702
High	Master Protein	GLYMA_19G044900	K10525 - allene oxide cyclase (AOC) (1 of 6)	0	11.633	9	2	6	2	257	28	8.57	17.78	2	0	0.959	1	38.42	98.1	101.9	42.84	18.9	High	High	High	High	High	High	1		3	3	Present Both	1	GLYMA_19G044900	GLYMA_19G044900	sp|Q9LS01|AOC3_ARATH	Allene oxide cyclase 3, chloroplastic GN=AOC3	ident:145/257 pos:185/257 query:257 hit:258 align:268 bit:257.3	OK	Allene oxide cyclase 3, chloroplastic	na	AOC3_ARATH	Q9LS01	na	AOC3	na	Arabidopsis thaliana (Mouse-ear cress)	3702
High	Master Protein	GLYMA_08G262900	K10839 - UV excision repair protein RAD23 (RAD23, HR23) (1 of 8)	0	24.636	11	3	8	3	401	42	4.84	17.3	3	0	1.341	0.815367	82.71	125.5	74.5	52.73	79.29	High	High	Peak Found	High	High	High	1		3	3	Present Both	1	GLYMA_08G262900	GLYMA_08G262900	sp|Q84L31|RD23C_ARATH	Ubiquitin receptor RAD23c GN=RAD23C	ident:293/401 pos:333/401 query:401 hit:419 align:429 bit:549.7	OK	Ubiquitin receptor RAD23c (AtRAD23c)	Putative DNA repair protein RAD23-3; RAD23-like protein 3 (AtRAD23-3)	RD23C_ARATH	Q84L31	Q9M887	RAD23C	RAD23; RAD23-3	Arabidopsis thaliana (Mouse-ear cress)	3702
High	Master Protein	GLYMA_02G288900	K11086 - small nuclear ribonucleoprotein B and B' (SNRPB, SMB) (1 of 2)	0	36.634	17	6	26	6	282	29.4	11.28	49.75	6	0	1.324	0.831431	41.36	68	132	20.08	36.38	High	High	High	High	High	High	1		3	3	Present Both	1	GLYMA_02G288900	GLYMA_02G288900	sp|Q9C6K5|LSM3B_ARATH	Sm-like protein LSM3B GN=LSM3B	ident:24/282 pos:40/282 query:282 hit:98 align:70 bit:47.4	Partial_match_query	Sm-like protein LSM3B (AtLSM3B)	U6 snRNA-associated Sm-like protein LSM3B	LSM3B_ARATH	Q9C6K5	na	LSM3B	na	Arabidopsis thaliana (Mouse-ear cress)	3702
High	Master Protein	GLYMA_05G185800	K11088 - small nuclear ribonucleoprotein D3 (SNRPD3, SMD3) (1 of 2)	0	111.436	38	6	33	6	131	14.2	10.42	111.2	6	0	1.123	0.940144	78.21	33.4	166.6	111.74	64.49	High	High	High	High	High	High	1		3	3	Present Both	1	GLYMA_05G185800	GLYMA_05G185800	sp|Q9LM92|SMD3B_ARATH	Small nuclear ribonucleoprotein SmD3b GN=SMD3B	ident:112/131 pos:116/131 query:131 hit:131 align:132 bit:213.4	OK	Small nuclear ribonucleoprotein SmD3b (SmD3-b)	snRNP core protein D3-b	SMD3B_ARATH	Q9LM92	Q8LC48; Q9LMW6	SMD3B	na	Arabidopsis thaliana (Mouse-ear cress)	3702
High	Master Protein	GLYMA_03G253300	K11091 - U1 small nuclear ribonucleoprotein A (SNRPA) (1 of 2)	0	12.475	19	4	9	4	241	26.9	9.44	16.71	4	0	0.797	0.927038	36.15	132.9	67.1	32.56	44.28	High	High	Peak Found	High	High	High	1		3	3	Present Both	1	GLYMA_03G253300	GLYMA_03G253300	sp|Q39244|RU1A_ARATH	U1 small nuclear ribonucleoprotein A GN=U1A	ident:177/241 pos:204/241 query:241 hit:250 align:249 bit:347.1	OK	U1 small nuclear ribonucleoprotein A (U1 snRNP protein A)	na	RU1A_ARATH	Q39244	na	U1A	na	Arabidopsis thaliana (Mouse-ear cress)	3702
High	Master Protein	GLYMA_14G200400	K11094 - U2 small nuclear ribonucleoprotein B'' (SNRPB2) (1 of 2)	0	24.251	17	2	5	2	232	26.2	9.16	16.52	2	0	0.643	0.729654	8.69	105.7	94.3	52.9	25.41	High	High	Peak Found	High	Peak Found	High	1		3	3	Present Both	1	GLYMA_14G200400	GLYMA_14G200400	sp|O22922|RU2B1_ARATH	U2 small nuclear ribonucleoprotein B'' GN=U2B''	ident:172/232 pos:206/232 query:232 hit:232 align:236 bit:367.1	OK	U2 small nuclear ribonucleoprotein B'' (U2 snRNP B'')	na	RU2B1_ARATH	O22922	Q8LB63	U2B''	na	Arabidopsis thaliana (Mouse-ear cress)	3702
High	Master Protein	GLYMA_05G240800	K11096 - small nuclear ribonucleoprotein D2 (SNRPD2, SMD2) (1 of 2)	0	12.974	19	3	9	3	108	12.5	9.86	22.46	3	0	1.581	0.562201	26.55	65.4	134.6	51.61	56.68	High	High	High	High	Peak Found	High	1		3	3	Present Both	1	GLYMA_05G240800	GLYMA_05G240800	sp|Q9C6K5|LSM3B_ARATH	Sm-like protein LSM3B GN=LSM3B	ident:30/108 pos:53/108 query:108 hit:98 align:91 bit:52.8	Poor_match	Sm-like protein LSM3B (AtLSM3B)	U6 snRNA-associated Sm-like protein LSM3B	LSM3B_ARATH	Q9C6K5	na	LSM3B	na	Arabidopsis thaliana (Mouse-ear cress)	3702
High	Master Protein	GLYMA_06G157100	K11097 - small nuclear ribonucleoprotein E (SNRPE, SME) (1 of 4)	0	89.56	68	6	25	6	88	10.3	9.99	66.84	6	0	1.592	0.552283	93.72	50.8	149.2	68.63	49.71	High	High	High	High	High	High	1		3	3	Present Both	1	GLYMA_06G157100	GLYMA_06G157100	sp|Q9FKB0|LSM5_ARATH	Sm-like protein LSM5 GN=LSM5	ident:28/88 pos:44/88 query:88 hit:88 align:78 bit:47.4	Poor_match	Sm-like protein LSM5 (AtLSM5)	Protein SUPERSENSITIVE TO ABA AND DROUGHT 1 (AtSAD1); U6 snRNA-associated Sm-like protein LSM5	LSM5_ARATH	Q9FKB0	Q0WMZ9	LSM5	na	Arabidopsis thaliana (Mouse-ear cress)	3702
High	Master Protein	GLYMA_19G195100	K11099 - small nuclear ribonucleoprotein G (SNRPG, SMG) (1 of 3)	0	89.999	84	8	35	2	79	8.8	9.25	103.71	8	0	1.127	0.940144	48.79	81.7	118.3	29.63	28.92	High	High	High	High	High	High	1		3	3	Present Both	1	GLYMA_19G195100	GLYMA_19G195100	sp|O82221|RUXG_ARATH	Probable small nuclear ribonucleoprotein G GN=RXW24L	ident:73/79 pos:76/79 query:79 hit:80 align:79 bit:150.6	OK	Probable small nuclear ribonucleoprotein G (snRNP-G)	Sm protein G (Sm-G; SmG)	RUXG_ARATH	O82221	na	OrderedLocusNames=At2g23930	na	Arabidopsis thaliana (Mouse-ear cress)	3702
High	Master Protein	GLYMA_11G086200	K11099 - small nuclear ribonucleoprotein G (SNRPG, SMG) (1 of 3)	0	84.29	84	8	27	2	79	8.8	9.25	76.47	8	6	0.963	0.999223	59.33	38.2	161.8	69.24	77.08	High	High	High	High	High	High	1		3	3	Present Both	1	GLYMA_11G086200	GLYMA_11G086200	sp|O82221|RUXG_ARATH	Probable small nuclear ribonucleoprotein G GN=RXW24L	ident:71/79 pos:75/79 query:79 hit:80 align:79 bit:148.3	OK	Probable small nuclear ribonucleoprotein G (snRNP-G)	Sm protein G (Sm-G; SmG)	RUXG_ARATH	O82221	na	OrderedLocusNames=At2g23930	na	Arabidopsis thaliana (Mouse-ear cress)	3702
High	Master Protein	GLYMA_03G164500	K11130 - H/ACA ribonucleoprotein complex subunit 3 (NOP10, NOLA3) (1 of 2)	0	109.494	88	7	33	5	64	7.5	9.85	107.79	7	2	0.824	0.943109	46.57	96.1	103.9	28.5	16.58	High	High	High	High	High	High	1		3	3	Present Both	1	GLYMA_03G164500	GLYMA_03G164500	sp|Q93XX8|NOP10_ARATH	H/ACA ribonucleoprotein complex subunit 3-like protein GN=NUP205	ident:52/64 pos:58/64 query:64 hit:64 align:64 bit:111.3	OK	H/ACA ribonucleoprotein complex subunit 3-like protein	Nucleolar protein 10	NOP10_ARATH	Q93XX8	Q9SIM0	OrderedLocusNames=At2g20490	na	Arabidopsis thaliana (Mouse-ear cress)	3702
High	Master Protein	GLYMA_01G022100	K11251 - histone H2A (H2A) (1 of 24)	0	153.098	56	7	38	4	135	14	10.05	138.17	7	2	0.789	0.919239	65.35	65.3	134.7	25.54	51.59	High	High	High	High	High	High	1		3	3	Present Both	1	GLYMA_01G022100	GLYMA_01G022100	sp|Q9LD28|H2A6_ARATH	Histone H2A.6 GN=RAT5	ident:122/135 pos:122/135 query:135 hit:130 align:125 bit:241.9	OK	Histone H2A.6	HTA1; Protein RESISTANT TO AGROBACTERIUM TRANSFORMATION 5	H2A6_ARATH	Q9LD28	na	RAT5	H2A-1	Arabidopsis thaliana (Mouse-ear cress)	3702
High	Master Protein	GLYMA_19G239200	K11251 - histone H2A (H2A) (1 of 24)	0	112.577	62	7	38	4	140	14.7	10.36	120.04	7	0	0.989	0.999223	65.42	99.6	100.4	67.48	8.72	High	High	High	High	High	High	1		3	3	Present Both	1	GLYMA_19G239200	GLYMA_19G239200	sp|Q9S9K7|H2AXB_ARATH	Probable histone H2AXb GN=EZA1	ident:132/140 pos:134/140 query:140 hit:142 align:142 bit:256.9	OK	Probable histone H2AXb	HTA3	H2AXB_ARATH	Q9S9K7	na	OrderedLocusNames=At1g54690	na	Arabidopsis thaliana (Mouse-ear cress)	3702
High	Master Protein	GLYMA_12G065100	K11252 - histone H2B (H2B) (1 of 16)	0	107.492	58	8	42	8	149	16.3	10.08	129.6	8	0	1.312	0.834549	104.46	49.8	150.2	70.35	59.74	High	High	High	High	High	High	1		3	3	Present Both	1	GLYMA_12G065100	GLYMA_12G065100	sp|O23629|H2B6_ARATH	Histone H2B.6 GN=H2B	ident:132/149 pos:138/149 query:149 hit:150 align:152 bit:238.8	OK	Histone H2B.6	H2BAt; HTB9	H2B6_ARATH	O23629	na	H2B	na	Arabidopsis thaliana (Mouse-ear cress)	3702
High	Master Protein	GLYMA_11G241700	K11253 - histone H3 (H3) (1 of 22)	0	14.517	13	5	24	5	265	30.5	10.1	35.27	5	0	1.124	0.940144	48.17	86.1	113.9	34.6	24.64	High	High	High	High	High	High	1		3	3	Present Both	1	GLYMA_11G241700	GLYMA_11G241700	sp|P59169|H33_ARATH	Histone H3.3 GN=HTR8	ident:136/265 pos:136/265 query:265 hit:136 align:136 bit:274.6	Poor_match	Histone H3.3	Histone H3.2	H33_ARATH	P59169	Q6NR95	HTR4	na	Arabidopsis thaliana (Mouse-ear cress)	3702
High	Master Protein	GLYMA_19G172500	K11254 - histone H4 (H4) (1 of 20)	0	163.09	38	11	70	11	156	17.9	11.36	217.09	11	0	1.305	0.83963	78.42	56.7	143.3	61.65	41.93	High	High	High	High	High	High	1		3	3	Present Both	1	GLYMA_19G172500	GLYMA_19G172500	sp|P59259|H4_ARATH	Histone H4 GN=GXM1	ident:103/156 pos:103/156 query:156 hit:103 align:103 bit:203.4	OK	Histone H4	na	H4_ARATH	P59259	P02308	OrderedLocusNames=At1g07660	na	Arabidopsis thaliana (Mouse-ear cress)	3702
High	Master Protein	GLYMA_09G064400	K11279 - nucleosome assembly protein 1-like 1 (NAP1L1, NRP) (1 of 3)	0	54.373	8	3	12	2	365	41.5	4.5	42.94	3	0	0.473	0.281851	3.74	135.7	64.3	2.66	25.65	High	High	Peak Found	High	Peak Found	High	1		3	3	Present Both	1	GLYMA_09G064400	GLYMA_09G064400	sp|Q94K07|NAP1C_ARATH	Nucleosome assembly protein 1 GN=NAP1	ident:267/365 pos:317/365 query:365 hit:374 align:374 bit:448.0	OK	Nucleosome assembly protein 1;3 (AtNAP1;3)	Nucleosome/chromatin assembly factor group A3	NAP1C_ARATH	Q94K07	Q9LTS5	NAP1	NFA3	Arabidopsis thaliana (Mouse-ear cress)	3702
High	Master Protein	GLYMA_11G101500	K11294 - nucleolin (NCL, NSR1) (1 of 11)	0	91.361	16	9	30	4	748	78.3	5.58	102.58	9	0	0.965	0.999223	86.28	68.3	131.7	108.17	9.69	High	High	High	High	Not Found	High	1		3	2	Present Both	1	GLYMA_11G101500	GLYMA_11G101500	sp|Q1PEP5|NUCL2_ARATH	Nucleolin 2 GN=NUCL2	ident:143/748 pos:189/748 query:748 hit:636 align:307 bit:256.5	Partial_match_both	Nucleolin 2	Protein NUCLEOLIN LIKE 2 (AtNUC-L2); Protein PARALLEL LIKE 1 (AtPARLL1)	NUCL2_ARATH	Q1PEP5	Q9LIH8	NUCL2	PARLL1	Arabidopsis thaliana (Mouse-ear cress)	3702
High	Master Protein	GLYMA_12G027400	K11294 - nucleolin (NCL, NSR1) (1 of 11)	0	88.857	17	10	35	5	744	77.5	5.49	110.56	10	5	1.366	0.799881	72.51	94.6	105.4	25.47	19.67	High	High	High	High	High	High	1		3	3	Present Both	1	GLYMA_12G027400	GLYMA_12G027400	sp|Q1PEP5|NUCL2_ARATH	Nucleolin 2 GN=NUCL2	ident:143/744 pos:190/744 query:744 hit:636 align:312 bit:252.3	Partial_match_both	Nucleolin 2	Protein NUCLEOLIN LIKE 2 (AtNUC-L2); Protein PARALLEL LIKE 1 (AtPARLL1)	NUCL2_ARATH	Q1PEP5	Q9LIH8	NUCL2	PARLL1	Arabidopsis thaliana (Mouse-ear cress)	3702
High	Master Protein	GLYMA_08G335300	K11338 - RuvB-like protein 2 [EC:3.6.4.12] (RUVBL2, RVB2, INO80J) (1 of 2)	0	31.399	14	6	16	6	465	51	5.47	32.9	6	0	1.062	0.976873	90.5	90.5	109.5	37.85	23.84	High	High	High	High	High	High	1		3	3	Present Both	1	GLYMA_08G335300	GLYMA_08G335300	sp|Q9FMR9|RIN1_ARATH	RuvB-like protein 1 GN=RIN1	ident:201/465 pos:301/465 query:465 hit:458 align:459 bit:373.6	Poor_match	RuvB-like protein 1	49 kDa TATA box-binding protein-interacting protein homolog (AtTIP49a); Ruv DNA-helicase-like protein	RIN1_ARATH	Q9FMR9	na	RIN1	RVB1; TIP49a	Arabidopsis thaliana (Mouse-ear cress)	3702
High	Master Protein	GLYMA_11G011200	K11352 - NADH dehydrogenase (ubiquinone) 1 alpha subcomplex subunit 12 (NDUFA12) (1 of 2)	0	69	42	7	30	7	158	18.3	8.84	69.05	7	0	0.772	0.913706	25.72	133.5	66.5	43.01	41.36	High	High	High	High	High	High	1		3	3	Present Both	1	GLYMA_11G011200	GLYMA_11G011200	sp|Q9M9M9|NDUAC_ARATH	Probable NADH dehydrogenase [ubiquinone] 1 alpha subcomplex subunit 12 GN=CBP20	ident:122/158 pos:138/158 query:158 hit:159 align:150 bit:273.5	OK	Probable NADH dehydrogenase [ubiquinone] 1 alpha subcomplex subunit 12	na	NDUAC_ARATH	Q9M9M9	na	OrderedLocusNames=At3g03100	na	Arabidopsis thaliana (Mouse-ear cress)	3702
High	Master Protein	GLYMA_10G128100	K11353 - NADH dehydrogenase (ubiquinone) 1 alpha subcomplex subunit 13 (NDUFA13) (1 of 1)	0	171.027	52	9	57	9	143	16.2	9.52	183.4	9	0	0.805	0.934958	23.69	103.6	96.4	30.63	4.04	High	High	High	High	High	High	1		3	3	Present Both	1	GLYMA_10G128100	GLYMA_10G128100	sp|O49313|NDADB_ARATH	NADH dehydrogenase [ubiquinone] 1 alpha subcomplex subunit 13-B GN=NDA2	ident:124/143 pos:135/143 query:143 hit:143 align:143 bit:261.9	OK	NADH dehydrogenase [ubiquinone] 1 alpha subcomplex subunit 13-B	na	NDADB_ARATH	O49313	na	OrderedLocusNames=At2g33220	na	Arabidopsis thaliana (Mouse-ear cress)	3702
High	Master Protein	GLYMA_08G096800	K11517 - (S)-2-hydroxy-acid oxidase (HAO) (1 of 7)	0	44.761	23	7	14	5	370	40.6	9.09	29.41	7	1	1.142	0.934958	65.16	104.6	95.4	32.72	35.57	High	High	High	High	High	High	1		3	3	Present Both	1	GLYMA_08G096800	GLYMA_08G096800	sp|Q9LRR9|GLO1_ARATH	(S)-2-hydroxy-acid oxidase GLO1 GN=GLO1	ident:319/370 pos:348/370 query:370 hit:367 align:365 bit:654.4	OK	(S)-2-hydroxy-acid oxidase GLO1	Glycolate oxidase 1 (AtGLO1; GOX 1); Short chain alpha-hydroxy acid oxidase GLO1	GLO1_ARATH	Q9LRR9	B9DHI6; Q8VZA4; Q944K6	GLO1	na	Arabidopsis thaliana (Mouse-ear cress)	3702
High	Master Protein	GLYMA_05G141400.3.p	K11517 - (S)-2-hydroxy-acid oxidase (HAO) (1 of 7)	0	43.371	11	4	7	2	368	40.1	8.32	23.81	4	0	1.567	0.575378	30.8	77.9	122.1		28.77	High	Not Found	Not Found	High	High	High	1	Acetyl [N-Term]	1	3	Only Sample	1	GLYMA_05G141400.3.p	GLYMA_05G141400.3.p	sp|O49506|GLO5_ARATH	Peroxisomal (S)-2-hydroxy-acid oxidase GLO5 GN=GLO5	ident:302/368 pos:330/368 query:368 hit:368 align:361 bit:630.6	OK	Peroxisomal (S)-2-hydroxy-acid oxidase GLO5	Glycolate oxidase 3 (AtGLO5; GOX 3); Short chain alpha-hydroxy acid oxidase GLO5	GLO5_ARATH	O49506	A8MRC3	GLO5	GOX3	Arabidopsis thaliana (Mouse-ear cress)	3702
High	Master Protein	GLYMA_08G048100	K11518 - mitochondrial import receptor subunit TOM40 (TOM40) (1 of 2)	0	18.313	10	3	7	3	310	34.6	7.81	19.95	3	0	1.033	0.983811	51.73	103.6	96.4	34.44	42.23	High	High	High	High	Peak Found	High	1		3	3	Present Both	1	GLYMA_08G048100	GLYMA_08G048100	sp|Q9LHE5|TO401_ARATH	Mitochondrial import receptor subunit TOM40-1 GN=TOM40-1	ident:223/310 pos:258/310 query:310 hit:309 align:310 bit:473.4	OK	Mitochondrial import receptor subunit TOM40-1, N-terminally processed	Translocase of outer membrane 40 kDa subunit homolog 1	TO401_ARATH	Q9LHE5	na	TOM40-1	na	Arabidopsis thaliana (Mouse-ear cress)	3702
High	Master Protein	GLYMA_15G259200	K12158 - ubiquitin-like protein Nedd8 (NEDD8) (1 of 3)	0	378.043	70	18	206	14	154	17.2	6.06	693.48	18	5	1.007	0.994195	59.39	120.6	79.4	20.45	34.69	High	High	High	High	High	High	1		3	3	Present Both	1	GLYMA_15G259200	GLYMA_15G259200	sp|Q9M1P9|RUB1_ARATH	Ubiquitin-NEDD8-like protein RUB1 GN=RUB1	ident:151/154 pos:152/154 query:154 hit:156 align:152 bit:299.7	OK	NEDD8-like protein RUB1	Ubiquitin-related protein 1 (AtRUB1)	RUB1_ARATH	Q9SHE7	O80715; P59263; Q0WQU3; Q38875; Q9LDJ2; Q9LYW1; Q9M0W3; Q9M1P9; Q9S7X3	RUB1	NEDD8; UBQ15	Arabidopsis thaliana (Mouse-ear cress)	3702
High	Master Protein	GLYMA_14G163800	K12162 - ubiquitin-fold modifier 1 (UFM1) (1 of 3)	0	25.39	62	3	12	3	94	10.2	9.19	31.31	3	0	1.065	0.976873	113.03	56.9	143.1	76.43	57.56	High	High	High	High	High	High	1		3	3	Present Both	1	GLYMA_14G163800	GLYMA_14G163800	sp|Q9CA23|UFM1_ARATH	Ubiquitin-fold modifier 1 GN=UGE3	ident:84/94 pos:86/94 query:94 hit:93 align:87 bit:171.8	OK	Ubiquitin-fold modifier 1	na	UFM1_ARATH	Q9CA23	na	OrderedLocusNames=At1g77710	na	Arabidopsis thaliana (Mouse-ear cress)	3702
High	Master Protein	GLYMA_07G191000	K12184 - ESCRT-I complex subunit VPS28 (VPS28) (1 of 2)	0	13.14	6	1	4	1	212	23.8	5.47	10.94	1	0	1.364	0.802954	118.1	101.6	98.4	82.94	129.4	High	High	Peak Found	Peak Found	High	Not Found	1		3	2	Present Both	1	GLYMA_07G191000	GLYMA_07G191000	sp|Q9S9T7|VP282_ARATH	Vacuolar protein sorting-associated protein 28 homolog 2 GN=VPS28-2	ident:180/212 pos:198/212 query:212 hit:210 align:208 bit:387.1	OK	Vacuolar protein sorting-associated protein 28 homolog 2	na	VP282_ARATH	Q9S9T7	Q6DBF1	VPS28-2	na	Arabidopsis thaliana (Mouse-ear cress)	3702
High	Master Protein	GLYMA_13G352200	K12197 - charged multivesicular body protein 1 (CHMP1, VPS46, DID2) (1 of 2)	0	12.048	10	2	7	2	203	22.6	7.2	16.86	2	0	0.642	0.72903	8.16	120.6	79.4	2.01	28.07	High	High	High	Peak Found	High	High	1		3	3	Present Both	1	GLYMA_13G352200	GLYMA_13G352200	sp|Q8LE58|CHM1A_ARATH	ESCRT-related protein CHMP1A GN=CHMP1A	ident:183/203 pos:195/203 query:203 hit:203 align:203 bit:380.6	OK	ESCRT-related protein CHMP1A	Protein CHARGED MULTIVESICULAR BODY PROTEIN 1A; Protein CHROMATIN MODIFYING PROTEIN 1A; Vacuolar protein-sorting-associated protein 46.1	CHM1A_ARATH	Q8LE58	Q9FZ60	CHMP1A	na	Arabidopsis thaliana (Mouse-ear cress)	3702
High	Master Protein	GLYMA_20G124000	K12200 - programmed cell death 6-interacting protein (PDCD6IP, ALIX, RIM20) (1 of 2)	0	42.04	7	5	8	5	896	100.4	6.44	20.95	5	0	1.361	0.804361	109.47	99.5	100.5	15.26	80.24	High	Peak Found	Peak Found	High	High	High	1		3	3	Present Both	1	GLYMA_20G124000	GLYMA_20G124000	sp|F4HXZ1|BRO1_ARATH	Vacuolar-sorting protein BRO1 GN=BRO1	ident:639/896 pos:724/896 query:896 hit:846 align:893 bit:1180.6	OK	Vacuolar-sorting protein BRO1	BRO domain-containing protein 1 (AtBRO1)	BRO1_ARATH	F4HXZ1	Q8H1H8; Q9XI56	BRO1	na	Arabidopsis thaliana (Mouse-ear cress)	3702
High	Master Protein	GLYMA_14G009700	K12349 - neutral ceramidase (ASAH2) (1 of 5)	0	36.633	5	3	9	3	768	84.5	7.24	36.04	3	0	0.911	0.993116	46.54	84.8	115.2	37.29	24.63	High	High	Peak Found	High	Peak Found	High	1		3	3	Present Both	1	GLYMA_14G009700	GLYMA_14G009700	sp|F4HQM3|NCER1_ARATH	Neutral ceramidase 1 GN=NCER1	ident:589/768 pos:656/768 query:768 hit:779 align:757 bit:1213.0	OK	Neutral ceramidase 1 (AtNCER1; N-CDase 1; NCDase 1)	Acylsphingosine deacylase 1; N-acylsphingosine amidohydrolase 1	NCER1_ARATH	F4HQM3	Q9LNV7	NCER1	na	Arabidopsis thaliana (Mouse-ear cress)	3702
High	Master Protein	GLYMA_08G039200	K12355 - coniferyl-aldehyde dehydrogenase (REF1) (1 of 9)	0	39.639	11	6	16	4	501	54.4	6.42	32.34	6	2	0.949	0.999223	68.14	95.3	104.7	34.76	11.76	High	High	High	High	High	High	1		3	3	Present Both	1	GLYMA_08G039200	GLYMA_08G039200	sp|Q56YU0|AL2C4_ARATH	Aldehyde dehydrogenase family 2 member C4 GN=ALDH2C4	ident:350/501 pos:415/501 query:501 hit:501 align:489 bit:743.4	OK	Aldehyde dehydrogenase family 2 member C4	ALDH1a; Protein REDUCED EPIDERMAL FLUORESCENCE 1	AL2C4_ARATH	Q56YU0	Q9LV57	ALDH2C4	REF1	Arabidopsis thaliana (Mouse-ear cress)	3702
High	Master Protein	GLYMA_05G231900	K12355 - coniferyl-aldehyde dehydrogenase (REF1) (1 of 9)	0	27.93	9	4	19	2	538	58.5	6.55	48.1	4	0	0.766	0.903704	49.59	103.9	96.1	54.16	56.46	High	High	Peak Found	Peak Found	High	High	1		3	3	Present Both	1	GLYMA_05G231900	GLYMA_05G231900	sp|Q56YU0|AL2C4_ARATH	Aldehyde dehydrogenase family 2 member C4 GN=ALDH2C4	ident:342/538 pos:410/538 query:538 hit:501 align:499 bit:724.2	OK	Aldehyde dehydrogenase family 2 member C4	ALDH1a; Protein REDUCED EPIDERMAL FLUORESCENCE 1	AL2C4_ARATH	Q56YU0	Q9LV57	ALDH2C4	REF1	Arabidopsis thaliana (Mouse-ear cress)	3702
High	Master Protein	GLYMA_13G004600	K12394 - AP-1 complex subunit sigma 1/2 (AP1S1_2) (1 of 3)	0	15.2	17	1	3	1	161	18.7	7.36	13.64	1	0	1.479	0.671316	12.47	80.7	119.3	7.71	11.24	High	Peak Found	High	Peak Found	Peak Found	High	1		3	3	Present Both	1	GLYMA_13G004600	GLYMA_13G004600	sp|O23685|AP1S2_ARATH	AP-1 complex subunit sigma-2 GN=AAP19-2	ident:143/161 pos:155/161 query:161 hit:162 align:160 bit:301.2	OK	AP-1 complex subunit sigma-2	Adaptor AP-1 19 kDa protein; Adaptor protein complex AP-1 sigma-2 subunit; Adaptor-related protein complex 1 sigma-2 subunit; Clathrin assembly protein complex 1 sigma-2 small chain; Clathrin assembly small subunit protein AP19-2 (AtAP19-2); Sigma 2 subunit of AP-1 clathrin; Sigma-adaptin 2; Sigma2-adaptin	AP1S2_ARATH	O23685	na	AAP19-2	na	Arabidopsis thaliana (Mouse-ear cress)	3702
High	Master Protein	GLYMA_20G063200	K12394 - AP-1 complex subunit sigma 1/2 (AP1S1_2) (1 of 3)	0	15.2	17	1	5	1	161	18.8	7.36	23.18	1	0	1.111	0.945207	22.2	92.6	107.4	9.82	32.37	High	Peak Found	High	High	High	Peak Found	1		3	3	Present Both	1	GLYMA_20G063200	GLYMA_20G063200	sp|O23685|AP1S2_ARATH	AP-1 complex subunit sigma-2 GN=AAP19-2	ident:143/161 pos:155/161 query:161 hit:162 align:160 bit:301.6	OK	AP-1 complex subunit sigma-2	Adaptor AP-1 19 kDa protein; Adaptor protein complex AP-1 sigma-2 subunit; Adaptor-related protein complex 1 sigma-2 subunit; Clathrin assembly protein complex 1 sigma-2 small chain; Clathrin assembly small subunit protein AP19-2 (AtAP19-2); Sigma 2 subunit of AP-1 clathrin; Sigma-adaptin 2; Sigma2-adaptin	AP1S2_ARATH	O23685	na	AAP19-2	na	Arabidopsis thaliana (Mouse-ear cress)	3702
High	Master Protein	GLYMA_18G299500	K12471 - epsin (EPN) (1 of 6)	0	22.089	4	4	9	4	975	104.1	6.05	20.46	4	0	0.43	0.186969	6.86	168.7	31.3	30.9	10.62	High	High	High	High	Peak Found	Not Found	1		3	2	Present Both	1	GLYMA_18G299500	GLYMA_18G299500	sp|Q93YP4|EPN3_ARATH	Clathrin interactor EPSIN 3 GN=EPSIN3	ident:506/975 pos:619/975 query:975 hit:1024 align:1092 bit:721.1	Poor_match	Clathrin interactor EPSIN 3	EPSIN-related 3	EPN3_ARATH	Q93YP4	Q9LX42	EPSIN3	EPSINR3	Arabidopsis thaliana (Mouse-ear cress)	3702
High	Master Protein	GLYMA_08G271700	K12493 - ADP-ribosylation factor GTPase-activating protein 2/3 (ARFGAP2_3) (1 of 2)	0	24.446	13	4	8	4	403	43.4	8.92	17.29	4	0	0.678	0.809359	29.14	145.6	54.4	18.24	31.25	High	High	Not Found	High	High	High	1		2	3	Present Both	1	GLYMA_08G271700	GLYMA_08G271700	sp|Q8H100|AGD8_ARATH	Probable ADP-ribosylation factor GTPase-activating protein AGD8 GN=AGD8	ident:288/403 pos:340/403 query:403 hit:413 align:412 bit:548.5	OK	Probable ADP-ribosylation factor GTPase-activating protein AGD8 (ARF GAP AGD8)	Protein ARF-GAP DOMAIN 8 (AtAGD8)	AGD8_ARATH	Q8H100	B9DG60; O49688; Q2V3H4; Q682W5; Q9C5L0	AGD8	na	Arabidopsis thaliana (Mouse-ear cress)	3702
High	Master Protein	GLYMA_05G151100	K12524 - bifunctional aspartokinase / homoserine dehydrogenase 1 (thrA) (1 of 2)	0	15.2	2	1	5	1	916	100.4	7.36	19.27	1	0	0.756	0.897585	7.32	113.9	86.1	6.79	12.77	High	High	High	High	Not Found	High	1		3	2	Present Both	1	GLYMA_05G151100	GLYMA_05G151100	sp|O81852|AKH2_ARATH	Bifunctional aspartokinase/homoserine dehydrogenase 2, chloroplastic GN=AKHSDH2	ident:707/916 pos:801/916 query:916 hit:916 align:918 bit:1456.4	OK	Homoserine dehydrogenase	Beta-aspartyl phosphate homoserine 2	AKH2_ARATH	O81852	Q3E9Y8	AKHSDH2	AK-HSDH II	Arabidopsis thaliana (Mouse-ear cress)	3702
High	Master Protein	GLYMA_07G072700	K12614 - ATP-dependent RNA helicase DDX6/DHH1 (DDX6, RCK, DHH1) (1 of 5)	0	19.309	9	3	9	3	503	57.7	8.4	28.79	3	0	1.783	0.391083	72.67	118.1	81.9	55.24	100.38	High	High	Peak Found	High	High	High	1		3	3	Present Both	1	GLYMA_07G072700	GLYMA_07G072700	sp|Q8RXK6|RH8_ARATH	DEAD-box ATP-dependent RNA helicase 8 GN=RH8	ident:431/503 pos:451/503 query:503 hit:505 align:515 bit:854.7	OK	DEAD-box ATP-dependent RNA helicase 8	na	RH8_ARATH	Q8RXK6	O65275; Q9ZS12	RH8	na	Arabidopsis thaliana (Mouse-ear cress)	3702
High	Master Protein	GLYMA_08G337200	K12616 - enhancer of mRNA-decapping protein 4 (EDC4) (1 of 5)	0	58.25	10	12	31	12	1346	146.2	5.91	67.64	12	0	0.951	0.999223	55.08	122.3	77.7	59.03	35.09	High	High	High	High	High	High	1		3	3	Present Both	1	GLYMA_08G337200	GLYMA_08G337200	sp|Q9LTT8|VCS_ARATH	Enhancer of mRNA-decapping protein 4 GN=VCS	ident:755/1346 pos:944/1346 query:1346 hit:1344 align:1354 bit:1414.0	OK	Enhancer of mRNA-decapping protein 4	Protein VARICOSE	VCS_ARATH	Q9LTT8	F4JC94; Q0WLC5; Q56YT1; Q8L7N9	VCS	EDC4	Arabidopsis thaliana (Mouse-ear cress)	3702
High	Master Protein	GLYMA_19G153500	K12621 - U6 snRNA-associated Sm-like protein LSm2 (LSM2) (1 of 2)	0	26.241	30	3	7	3	93	10.7	7.44	20.54	3	0	0.356	0.0634751	3.16	91.7	108.3	46.41	57.78	High	High	High	High	Peak Found	High	1		3	3	Present Both	1	GLYMA_19G153500	GLYMA_19G153500	sp|Q1H595|LSM2_ARATH	Sm-like protein LSM2 GN=LSM2	ident:82/93 pos:89/93 query:93 hit:93 align:93 bit:175.3	OK	Sm-like protein LSM2 (AtLSM2)	U6 snRNA-associated Sm-like protein LSM2	LSM2_ARATH	Q1H595	Q8L5U6; Q9ZVT4	LSM2	na	Arabidopsis thaliana (Mouse-ear cress)	3702
High	Master Protein	GLYMA_02G082300	K12622 - U6 snRNA-associated Sm-like protein LSm3 (LSM3) (1 of 2)	0	7.295	21	2	12	2	97	11.2	4.88	18.53	2	0	0.994	0.999223	12.87	100.3	99.7	29.06	33.05	High	High	Peak Found	High	High	High	1		3	3	Present Both	1	GLYMA_02G082300	GLYMA_02G082300	sp|Q9C6K5|LSM3B_ARATH	Sm-like protein LSM3B GN=LSM3B	ident:89/97 pos:93/97 query:97 hit:98 align:97 bit:179.1	OK	Sm-like protein LSM3B (AtLSM3B)	U6 snRNA-associated Sm-like protein LSM3B	LSM3B_ARATH	Q9C6K5	na	LSM3B	na	Arabidopsis thaliana (Mouse-ear cress)	3702
High	Master Protein	GLYMA_18G229600.2.p	K12625 - U6 snRNA-associated Sm-like protein LSm6 (LSM6) (1 of 2)	0	37.521	47	6	23	6	91	9.8	9.07	53.57	6	0	0.964	0.999223	29.05	99.6	100.4	21.6	16.34	High	High	High	High	High	High	1		3	3	Present Both	1	GLYMA_18G229600.2.p	GLYMA_18G229600.2.p	sp|Q9M1Z3|LSM6A_ARATH	Sm-like protein LSM6A GN=LSM6A	ident:80/91 pos:83/91 query:91 hit:91 align:91 bit:165.6	OK	Sm-like protein LSM6A (AtLSM6A)	U6 snRNA-associated Sm-like protein LSM6A	LSM6A_ARATH	Q9M1Z3	A0A1I9LSF1; Q8LCS5	LSM6A	na	Arabidopsis thaliana (Mouse-ear cress)	3702
High	Master Protein	GLYMA_05G149300	K12626 - U6 snRNA-associated Sm-like protein LSm7 (LSM7) (1 of 3)	0	4.88	35	2	4	2	99	10.7	4.84	2.14	2	0	1.744	0.421441	67.63	74.2	125.8	78.33	32.39	High	High	Peak Found	Peak Found	High	High	1		3	3	Present Both	1	GLYMA_05G149300	GLYMA_05G149300	sp|Q9SI54|LSM7_ARATH	Sm-like protein LSM7 GN=LSM7	ident:89/99 pos:93/99 query:99 hit:99 align:98 bit:180.6	OK	Sm-like protein LSM7 (AtLSM7)	Protein EMBRYO DEFECTIVE 2816; U6 snRNA-associated Sm-like protein LSM7	LSM7_ARATH	Q9SI54	na	LSM7	na	Arabidopsis thaliana (Mouse-ear cress)	3702
High	Master Protein	GLYMA_20G141900	K12669 - oligosaccharyltransferase complex subunit gamma (OST3, OST6) (1 of 2)	0	7.876	5	2	9	1	336	37.8	9.25	24.05	2	0	0.827	0.94531	60.2	144.1	55.9	44.01	98.44	High	High	Peak Found	High	High	High	1		3	3	Present Both	1	GLYMA_20G141900	GLYMA_20G141900	sp|Q9SYB5|OST3B_ARATH	Probable dolichyl-diphosphooligosaccharide--protein glycosyltransferase subunit 3B GN=OST3B	ident:209/336 pos:260/336 query:336 hit:346 align:311 bit:447.6	OK	Probable dolichyl-diphosphooligosaccharide--protein glycosyltransferase subunit 3B	na	OST3B_ARATH	Q9SYB5	Q67ZL6	OST3B	na	Arabidopsis thaliana (Mouse-ear cress)	3702
High	Master Protein	GLYMA_12G045400	K12670 - oligosaccharyltransferase complex subunit beta (WBP1) (1 of 1)	0	13.232	8	3	7	3	433	48.2	6.48	11.99	3	0	0.89	0.983811	61.98	117.9	82.1	33.97	14.53	High	High	High	High	High	High	1		3	3	Present Both	1	GLYMA_12G045400	GLYMA_12G045400	sp|Q944K2|OST48_ARATH	Dolichyl-diphosphooligosaccharide--protein glycosyltransferase 48 kDa subunit GN=OST48	ident:322/433 pos:383/433 query:433 hit:437 align:430 bit:674.9	OK	Dolichyl-diphosphooligosaccharide--protein glycosyltransferase 48 kDa subunit (Oligosaccharyl transferase 48 kDa subunit)	Protein DEFECTIVE GLYCOSYLATION 1	OST48_ARATH	Q944K2	Q8LDT6; Q94CD6; Q9LVR2	OST48	DGL1	Arabidopsis thaliana (Mouse-ear cress)	3702
High	Master Protein	GLYMA_09G007700.3.p	K12825 - splicing factor 3A subunit 1 (SF3A1, SAP114) (1 of 3)	0	21.942	7	4	12	4	806	88.9	5.15	15.27	4	0	1.831	0.366835	57.28	59.1	140.9	7.23	35.27	High	High	Peak Found	High	High	High	1		3	3	Present Both	1	GLYMA_09G007700.3.p	GLYMA_09G007700.3.p	sp|Q8RXF1|SF3A1_ARATH	Probable splicing factor 3A subunit 1 GN=SF1	ident:561/806 pos:635/806 query:806 hit:785 align:815 bit:931.0	OK	Probable splicing factor 3A subunit 1	na	SF3A1_ARATH	Q8RXF1	Q0WWB5; Q9MA20	OrderedLocusNames=At1g14650	na	Arabidopsis thaliana (Mouse-ear cress)	3702
High	Master Protein	GLYMA_02G278800	K12833 - pre-mRNA branch site protein p14 (SF3B14) (1 of 2)	0	33.427	36	3	6	3	124	14.4	9.57	20.64	3	0	0.412	0.151001	11.96	120.2	79.8	5.88	40.82	High	High	Not Found	High	Peak Found	High	1		2	3	Present Both	1	GLYMA_02G278800	GLYMA_02G278800	sp|Q9FMP4|SF3B6_ARATH	Splicing factor 3B subunit 6-like protein GN=SWEET9	ident:111/124 pos:115/124 query:124 hit:124 align:124 bit:233.0	OK	Splicing factor 3B subunit 6-like protein	Pre-mRNA branch site p14-like protein	SF3B6_ARATH	Q9FMP4	na	OrderedLocusNames=At5g12190	na	Arabidopsis thaliana (Mouse-ear cress)	3702
High	Master Protein	GLYMA_13G167800	K12845 - U4/U6 small nuclear ribonucleoprotein SNU13 (SNU13, NHP2L) (1 of 4)	0	93.295	50	5	32	1	153	16.6	7.87	128.11	5	4	0.782	0.919239	45.73	102.4	97.6	69.62	10.26	High	High	High	High	Not Found	High	1		3	2	Present Both	1	GLYMA_13G167800	GLYMA_13G167800	sp|Q9LEY9|NHP2_ARATH	H/ACA ribonucleoprotein complex subunit 2-like protein GN=NHL6	ident:49/153 pos:74/153 query:153 hit:156 align:133 bit:89.0	Poor_match	H/ACA ribonucleoprotein complex subunit 2-like protein	Nhp2-like protein	NHP2_ARATH	Q9LEY9	na	OrderedLocusNames=At5g08180	na	Arabidopsis thaliana (Mouse-ear cress)	3702
High	Master Protein	GLYMA_14G196700	K12845 - U4/U6 small nuclear ribonucleoprotein SNU13 (SNU13, NHP2L) (1 of 4)	0	93.295	60	5	31	1	128	13.8	7.12	124.2	5	0	2.051	0.229425	50.1	65.5	134.5	77.15	11.33	High	High	High	High	Not Found	High	1		3	2	Present Both	1	GLYMA_14G196700	GLYMA_14G196700	sp|Q9LEY9|NHP2_ARATH	H/ACA ribonucleoprotein complex subunit 2-like protein GN=NHL6	ident:48/128 pos:73/128 query:128 hit:156 align:131 bit:88.6	Poor_match	H/ACA ribonucleoprotein complex subunit 2-like protein	Nhp2-like protein	NHP2_ARATH	Q9LEY9	na	OrderedLocusNames=At5g08180	na	Arabidopsis thaliana (Mouse-ear cress)	3702
High	Master Protein	GLYMA_08G173500	K12854 - pre-mRNA-splicing helicase BRR2 (SNRNP200, BRR2) (1 of 2)	0	4.086	1	1	1	1	2183	247.2	5.88	1.75	1	0	0.01	9.48889e-17		200		18.12		High	Peak Found	Not Found	Not Found	Not Found	Not Found	1		2	0	Only Control	1	GLYMA_08G173500	GLYMA_08G173500	sp|Q9SYP1|DEXHC_ARATH	DExH-box ATP-dependent RNA helicase DExH12 GN=BRR2A	ident:1758/2183 pos:1971/2183 query:2183 hit:2171 align:2180 bit:3605.1	OK	DExH-box ATP-dependent RNA helicase DExH12	BRR2 homolog A (AtBRR2A); Pre-mRNA-splicing helicase BRR2A; Protein EMBRYO DEFECTIVE 1507	DEXHC_ARATH	Q9SYP1	Q56Z02; Q8W577	BRR2A	na	Arabidopsis thaliana (Mouse-ear cress)	3702
High	Master Protein	GLYMA_18G019700	K12875 - apoptotic chromatin condensation inducer in the nucleus (ACIN1, ACINUS) (1 of 2)	0	59.162	7	5	16	1	708	78	4.74	71.35	5	3	1.115	0.943109	83.43	53.4	146.6	103.88	40.55	High	High	Peak Found	High	Not Found	High	1	Phospho [S657]	3	2	Present Both	1	GLYMA_18G019700	GLYMA_18G019700	sp|Q9SG79|SUN2_ARATH	SUN domain-containing protein 2 GN=SUN2	ident:17/708 pos:30/708 query:708 hit:455 align:51 bit:30.8	Partial_match_both	SUN domain-containing protein 2 (AtSUN2)	na	SUN2_ARATH	Q9SG79	Q8L9I5	SUN2	na	Arabidopsis thaliana (Mouse-ear cress)	3702
High	Master Protein	GLYMA_11G237500.3.p	K12875 - apoptotic chromatin condensation inducer in the nucleus (ACIN1, ACINUS) (1 of 2)	0	55.429	7	5	15	1	705	77.8	4.88	66.89	5	0	1.102	0.949231	20.33	95.2	104.8	43.62	0.42	High	Peak Found	Peak Found	Peak Found	High	High	1	Phospho [S654]	3	3	Present Both	1	GLYMA_11G237500.3.p	GLYMA_11G237500.3.p	sp|Q11207|PARP2_ARATH	Poly [ADP-ribose] polymerase 2 GN=PARP2	ident:16/705 pos:24/705 query:705 hit:637 align:34 bit:32.3	Partial_match_both	Poly [ADP-ribose] polymerase 2 (PARP-2)	NAD(+) ADP-ribosyltransferase 2 (ADPRT-2); Poly[ADP-ribose] synthase 2	PARP2_ARATH	Q11207	O81294	PARP2	APP	Arabidopsis thaliana (Mouse-ear cress)	3702
High	Master Protein	GLYMA_11G141500.2.p	K12881 - THO complex subunit 4 (THOC4, ALY) (1 of 5)	0	31.446	25	4	15	4	247	26.2	10.1	43.1	4	0	1.232	0.883173	39.8	48.8	151.2	7.68	43.57	High	High	High	High	High	High	1		3	3	Present Both	1	GLYMA_11G141500.2.p	GLYMA_11G141500.2.p	sp|Q8L773|THO4A_ARATH	THO complex subunit 4A GN=ALY1	ident:146/247 pos:179/247 query:247 hit:244 align:250 bit:232.6	OK	THO complex subunit 4A	ALYREF homolog 1 (AtALY1)	THO4A_ARATH	Q8L773	Q8LCA6; Q9FJE1	ALY1	THO4A	Arabidopsis thaliana (Mouse-ear cress)	3702
High	Master Protein	GLYMA_14G136700	K12896 - splicing factor, arginine/serine-rich 7 (SFRS7) (1 of 8)	0	55.532	22	6	23	6	178	20.4	11.36	57.21	6	0	1.213	0.897585	27.39	72.5	127.5	34.07	17.55	High	High	High	High	High	High	1		3	3	Present Both	1	GLYMA_14G136700	GLYMA_14G136700	sp|O81126|RSZ22_ARATH	Serine/arginine-rich splicing factor RSZ22 GN=RSZ22	ident:137/178 pos:146/178 query:178 hit:200 align:200 bit:210.3	OK	Serine/arginine-rich splicing factor RSZ22	RS-containing zinc finger protein 22 (At-RSZ22; At-RSZp22; AtRSZ22)	RSZ22_ARATH	O81126	O23646	RSZ22	RSZP22; SRZ22	Arabidopsis thaliana (Mouse-ear cress)	3702
Medium	Master Protein	GLYMA_10G156000	K12948 - signal peptidase complex subunit 3 (SPCS3, SPC3) (1 of 5)	0.012	1.644	3	1	4	1	193	22.1	9.47	1.63	1	0	1.184	0.917348	31.61	96.6	103.4	77.58	16.68	High	High	Peak Found	Peak Found	High	High	1		3	3	Present Both	1	GLYMA_10G156000	GLYMA_10G156000	sp|Q53YF3|SPC3B_ARATH	Signal peptidase complex subunit 3B GN=SPDSYN1	ident:124/193 pos:144/193 query:193 hit:167 align:193 bit:264.6	OK	Signal peptidase complex subunit 3B	Microsomal signal peptidase 22 kDa subunit (SPC22; SPase 22 kDa subunit)	SPC3B_ARATH	Q53YF3	na	OrderedLocusNames=At5g27430	na	Arabidopsis thaliana (Mouse-ear cress)	3702
High	Master Protein	GLYMA_09G258000	K13034 - L-3-cyanoalanine synthase/ cysteine synthase (ATCYSC1) (1 of 2)	0	15.042	7	2	5	2	373	40.1	7.56	9.89	2	0	0.569	0.529569	14.57	126.7	73.3	68.25	37.27	High	High	High	Peak Found	Peak Found	High	1		3	3	Present Both	1	GLYMA_09G258000	GLYMA_09G258000	sp|Q9S757|CYSC1_ARATH	Bifunctional L-3-cyanoalanine synthase/cysteine synthase C1, mitochondrial GN=CYSC1	ident:292/373 pos:329/373 query:373 hit:368 align:373 bit:589.3	OK	Bifunctional L-3-cyanoalanine synthase/cysteine synthase C1, mitochondrial	Beta-substituted Ala synthase 3;1 (ARAth-Bsas3;1); Cysteine synthase C1 (AtCYSC1); O-acetylserine (thiol)-lyase 5	CYSC1_ARATH	Q9S757	F4JEA0; F4JEA1	CYSC1	OAS5	Arabidopsis thaliana (Mouse-ear cress)	3702
High	Master Protein	GLYMA_17G240400	K13126 - polyadenylate-binding protein (PABPC) (1 of 14)	0	103.64	18	10	28	2	654	71.9	7.15	85.17	10	7	1.01	0.99265	51.27	113.6	86.4	47.27	8.36	High	High	High	High	High	High	1		3	3	Present Both	1	GLYMA_17G240400	GLYMA_17G240400	sp|P42731|PABP2_ARATH	Polyadenylate-binding protein 2 GN=PAB2	ident:442/654 pos:525/654 query:654 hit:629 align:656 bit:863.6	OK	Polyadenylate-binding protein 2 (PABP-2; Poly(A)-binding protein 2)	na	PABP2_ARATH	P42731	Q8RXR5	PAB2	na	Arabidopsis thaliana (Mouse-ear cress)	3702
High	Master Protein	GLYMA_14G084500	K13126 - polyadenylate-binding protein (PABPC) (1 of 14)	0	94.801	19	10	27	1	652	71.7	7.78	78.83	10	1	0.973	0.999223	107.46	66.1	133.9	90.3	37.13	High	Not Found	Not Found	High	Not Found	High	1		1	2	Only Sample	1	GLYMA_14G084500	GLYMA_14G084500	sp|P42731|PABP2_ARATH	Polyadenylate-binding protein 2 GN=PAB2	ident:440/652 pos:523/652 query:652 hit:629 align:655 bit:857.1	OK	Polyadenylate-binding protein 2 (PABP-2; Poly(A)-binding protein 2)	na	PABP2_ARATH	P42731	Q8RXR5	PAB2	na	Arabidopsis thaliana (Mouse-ear cress)	3702
High	Master Protein	GLYMA_18G251400	K13199 - plasminogen activator inhibitor 1 RNA-binding protein (SERBP1) (1 of 5)	0	146.267	39	11	43	7	370	39.9	6.3	149.59	11	5	1.421	0.739185	60.32	44.2	155.8	7.42	45.34	High	High	High	High	High	High	1		3	3	Present Both	1	GLYMA_18G251400	GLYMA_18G251400	sp|O23593|RGGB_ARATH	RGG repeats nuclear RNA binding protein B GN=RGGB	ident:191/370 pos:235/370 query:370 hit:360 align:385 bit:280.0	Poor_match	RGG repeats nuclear RNA binding protein B	na	RGGB_ARATH	O23593	Q8LB56	RGGB	na	Arabidopsis thaliana (Mouse-ear cress)	3702
High	Master Protein	GLYMA_03G110300	K13199 - plasminogen activator inhibitor 1 RNA-binding protein (SERBP1) (1 of 5)	0	138.42	25	7	48	2	368	39.1	6.02	179.58	7	4	1.164	0.919239	52.2	55	145	67.91	29.17	High	High	High	High	High	High	1		3	3	Present Both	1	GLYMA_03G110300	GLYMA_03G110300	sp|O23593|RGGB_ARATH	RGG repeats nuclear RNA binding protein B GN=RGGB	ident:189/368 pos:232/368 query:368 hit:360 align:389 bit:271.9	Poor_match	RGG repeats nuclear RNA binding protein B	na	RGGB_ARATH	O23593	Q8LB56	RGGB	na	Arabidopsis thaliana (Mouse-ear cress)	3702
High	Master Protein	GLYMA_07G114600	K13199 - plasminogen activator inhibitor 1 RNA-binding protein (SERBP1) (1 of 5)	0	121.013	25	7	46	2	368	39.3	6.19	175.68	7	0	1.545	0.597155	31.1	78.5	121.5	27.62	7.93	High	High	High	High	High	High	1		3	3	Present Both	1	GLYMA_07G114600	GLYMA_07G114600	sp|O23593|RGGB_ARATH	RGG repeats nuclear RNA binding protein B GN=RGGB	ident:186/368 pos:228/368 query:368 hit:360 align:391 bit:269.6	Poor_match	RGG repeats nuclear RNA binding protein B	na	RGGB_ARATH	O23593	Q8LB56	RGGB	na	Arabidopsis thaliana (Mouse-ear cress)	3702
High	Master Protein	GLYMA_17G230300	K13210 - far upstream element-binding protein (FUBP) (1 of 4)	0	42.31	9	4	7	4	672	69.1	5.88	25.4	4	0	1.045	0.976873	26.52	78.9	121.1	90.15	9.76	High	Peak Found	Peak Found	High	High	High	1		3	3	Present Both	1	GLYMA_17G230300	GLYMA_17G230300	sp|Q9LZ82|BTR1_ARATH	Protein BTR1 GN=BTR1	ident:49/672 pos:79/672 query:672 hit:313 align:161 bit:63.2	Partial_match_both	Protein BTR1	Binding to ToMV RNA 1	BTR1_ARATH	Q9LZ82	B9DH67; F4JW99	BTR1	na	Arabidopsis thaliana (Mouse-ear cress)	3702
High	Master Protein	GLYMA_16G050800	K13250 - translocon-associated protein subunit beta (SSR2) (1 of 2)	0	46.366	27	4	17	1	194	20.9	9.36	57.18	4	3	0.763	0.899245	18.86	113.9	86.1	8.17	2.91	High	Not Found	High	Not Found	High	High	1		2	2	Present Both	1	GLYMA_16G050800	GLYMA_16G050800	sp|P46573|PBL10_ARATH	Probable serine/threonine-protein kinase PBL10 GN=PBL10	ident:19/194 pos:26/194 query:194 hit:412 align:48 bit:28.5	Partial_match_both	Probable serine/threonine-protein kinase PBL10	PBS1-like protein 10; Protein kinase 1B	PBL10_ARATH	P46573	Q7GAG3; Q9SLH5	PBL10	na	Arabidopsis thaliana (Mouse-ear cress)	3702
High	Master Protein	GLYMA_07G202300	K13257 - 2-hydroxyisoflavanone synthase (CYP93C) (1 of 2)	0	17.675	7	4	11	4	521	58.9	9.01	27.69	4	0	0.651	0.74838	20.95	139.3	60.7	53.57	51.73	High	High	High	High	High	High	1		3	3	Present Both	1	GLYMA_07G202300	GLYMA_07G202300	sp|Q9LJY7|C75AK_ARATH	Cytochrome P450 705A20 GN=CYP705A20	ident:180/521 pos:271/521 query:521 hit:510 align:492 bit:308.1	Poor_match	Cytochrome P450 705A20	na	C75AK_ARATH	Q9LJY7	na	CYP705A20	na	Arabidopsis thaliana (Mouse-ear cress)	3702
High	Master Protein	GLYMA_05G037400	K13343 - peroxin-14 (PEX14) (1 of 2)	0	6.278	2	1	1	1	502	54.6	5.81	2.09	1	0	1.091	0.957893	19.44	91.8	108.2	17.05	13	High	Peak Found	Not Found	Peak Found	Peak Found	Peak Found	1		2	3	Present Both	1	GLYMA_05G037400	GLYMA_05G037400	sp|Q9FXT6|PEX14_ARATH	Peroxisomal membrane protein PEX14 GN=PEX14	ident:223/502 pos:292/502 query:502 hit:507 align:483 bit:337.4	Poor_match	Peroxisomal membrane protein PEX14	Peroxin-14 (AtPEX14); Peroxisome biogenesis protein 14; Pex14p; Protein PEROXISOME DEFECTIVE 2	PEX14_ARATH	Q9FXT6	Q8L620; Q8L9N2; Q9FE40; Q9FT86	PEX14	PED2	Arabidopsis thaliana (Mouse-ear cress)	3702
High	Master Protein	GLYMA_10G218800	K13418 - somatic embryogenesis receptor kinase 1 [EC:2.7.10.1 2.7.11.1] (SERK1) (1 of 3)	0	15.094	3	1	6	1	624	68.9	5.73	25.87	1	0	0.782	0.919239	23.44	112.2	87.8		35.37	High	High	Not Found	High	High	High	1		2	3	Present Both	1	GLYMA_10G218800	GLYMA_10G218800	sp|Q94AG2|SERK1_ARATH	Somatic embryogenesis receptor kinase 1 GN=SERK1	ident:553/624 pos:579/624 query:624 hit:625 align:607 bit:1050.8	OK	Somatic embryogenesis receptor kinase 1 (AtSERK1)	Somatic embryogenesis receptor-like kinase 1	SERK1_ARATH	Q94AG2	C0LGI6; Q9M9G3	SERK1	na	Arabidopsis thaliana (Mouse-ear cress)	3702
High	Master Protein	GLYMA_02G008500	K13436 - pto-interacting protein 1 (PTI1) (1 of 8)	0	55.289	24	6	25	1	361	39.1	6.74	69.14	6	2	0.777	0.919239	23.47	92.1	107.9	24.84	38.33	High	High	Not Found	High	High	High	1		2	3	Present Both	1	GLYMA_02G008500	GLYMA_02G008500	sp|O80719|Y2706_ARATH	Probable receptor-like protein kinase At2g47060 GN=CBSCBSPB5	ident:296/361 pos:322/361 query:361 hit:365 align:362 bit:578.9	OK	Probable receptor-like protein kinase At2g47060	na	Y2706_ARATH	O80719	Q27GL0; Q2V401; Q3EBE8	OrderedLocusNames=At2g47060	na	Arabidopsis thaliana (Mouse-ear cress)	3702
High	Master Protein	GLYMA_10G009100	K13436 - pto-interacting protein 1 (PTI1) (1 of 8)	0	54.795	24	6	27	1	361	39.1	6.39	75.56	6	0	0.924	0.999223	12.98	107.2	92.8	11.07	13.47	High	High	Not Found	High	High	High	1		2	3	Present Both	1	GLYMA_10G009100	GLYMA_10G009100	sp|O80719|Y2706_ARATH	Probable receptor-like protein kinase At2g47060 GN=CBSCBSPB5	ident:298/361 pos:326/361 query:361 hit:365 align:362 bit:582.8	OK	Probable receptor-like protein kinase At2g47060	na	Y2706_ARATH	O80719	Q27GL0; Q2V401; Q3EBE8	OrderedLocusNames=At2g47060	na	Arabidopsis thaliana (Mouse-ear cress)	3702
High	Master Protein	GLYMA_16G090700	K13456 - RPM1-interacting protein 4 (RIN4) (1 of 5)	0	55.631	35	6	21	2	246	27.1	8.29	72.9	6	4	0.586	0.573641	36.16	151.5	48.5	85.42	119.36	High	High	Not Found	High	High	High	1	Phospho [S130]	2	3	Present Both	1	GLYMA_16G090700	GLYMA_16G090700	sp|Q8GYN5|RIN4_ARATH	RPM1-interacting protein 4 GN=RIN4	ident:102/246 pos:137/246 query:246 hit:211 align:248 bit:153.7	Poor_match	RPM1-interacting protein 4	na	RIN4_ARATH	Q8GYN5	Q9LSG9	RIN4	na	Arabidopsis thaliana (Mouse-ear cress)	3702
High	Master Protein	GLYMA_17G044000	K13462 - guanine nucleotide-exchange factor (MIN7) (1 of 2)	0	24.827	3	4	10	4	1782	197.6	5.54	22.49	4	0	0.783	0.919239	27.15	103.9	96.1	15.14	21.42	High	High	High	High	High	High	1		3	3	Present Both	1	GLYMA_17G044000	GLYMA_17G044000	sp|F4IXW2|BIG5_ARATH	Brefeldin A-inhibited guanine nucleotide-exchange protein 5 GN=BIG5	ident:1324/1782 pos:1483/1782 query:1782 hit:1739 align:1788 bit:2656.3	OK	Brefeldin A-inhibited guanine nucleotide-exchange protein 5 (BIG5)	ARF guanine-nucleotide exchange factor BIG5; Protein BFA-VISUALIZED ENDOCYTIC TRAFFICKING DEFECTIVE 1 (Protein BEN1); Protein HOPM INTERACTOR 7	BIG5_ARATH	F4IXW2	F4IXW1; Q0WM86; Q9LXK4	BIG5	ATMIN7; BEN1	Arabidopsis thaliana (Mouse-ear cress)	3702
High	Master Protein	GLYMA_03G182800	K13525 - transitional endoplasmic reticulum ATPase (VCP, CDC48) (1 of 11)	0	61.727	11	10	28	1	808	89.6	5.26	59.5	10	0	1.437	0.723218	89.16	127.2	72.8	54.06	69.5	High	High	Peak Found	High	High	High	1		3	3	Present Both	1	GLYMA_03G182800	GLYMA_03G182800	sp|Q9LZF6|CD48E_ARATH	Cell division control protein 48 homolog E GN=CDC48E	ident:741/808 pos:777/808 query:808 hit:810 align:800 bit:1531.5	OK	Cell division control protein 48 homolog E (AtCDC48e)	Transitional endoplasmic reticulum ATPase E	CD48E_ARATH	Q9LZF6	na	CDC48E	na	Arabidopsis thaliana (Mouse-ear cress)	3702
High	Master Protein	GLYMA_13G328300	K13984 - thioredoxin domain-containing protein 5 (TXNDC5, ERP46) (1 of 2)	0	5.74	14	2	4	2	147	16.8	5.25	1.75	2	0	2.261	0.138056	96.33	114	86	64.05	125.74	High	High	Peak Found	Not Found	High	Peak Found	1		3	2	Present Both	1	GLYMA_13G328300	GLYMA_13G328300	sp|Q8GYD1|PDI51_ARATH	Protein disulfide-isomerase 5-1 GN=PDIL5-1	ident:97/147 pos:118/147 query:147 hit:146 align:139 bit:207.2	OK	Protein disulfide-isomerase 5-1 (AtPDIL5-1)	Protein disulfide-isomerase 6-1 (AtPDIL6-1)	PDI51_ARATH	Q8GYD1	Q96313; Q9LN11	PDIL5-1	PDIL6-1	Arabidopsis thaliana (Mouse-ear cress)	3702
High	Master Protein	GLYMA_09G226400	K14005 - protein transport protein SEC31 (SEC31) (1 of 2)	0	6.643	1	1	4	1	1148	124.9	5.31	5.43	1	0	0.935	0.999223	32.2	117.3	82.7	23.13	42.18	High	High	Peak Found	Peak Found	High	High	1		3	3	Present Both	1	GLYMA_09G226400	GLYMA_09G226400	sp|Q8L611|SC31B_ARATH	Protein transport protein SEC31 homolog B GN=SEC31B	ident:740/1148 pos:879/1148 query:1148 hit:1104 align:1162 bit:1405.2	OK	Protein transport protein SEC31 homolog B	SEC31-like protein B	SC31B_ARATH	Q8L611	Q9LY69	SEC31B	na	Arabidopsis thaliana (Mouse-ear cress)	3702
High	Master Protein	GLYMA_09G005400	K14009 - B-cell receptor-associated protein 31 (BCAP31, BAP31) (1 of 9)	0	5.989	8	2	4	2	222	25.2	9.73	8.95	2	0	1.065	0.976873	67.87	123.3	76.7	69.48	57.35	High	Peak Found	Peak Found	High	High	High	1		3	3	Present Both	1	GLYMA_09G005400	GLYMA_09G005400	sp|Q39191|WAK1_ARATH	Wall-associated receptor kinase 1 GN=WAK1	ident:23/222 pos:38/222 query:222 hit:735 align:68 bit:32.3	Partial_match_both	Wall-associated receptor kinase 1	na	WAK1_ARATH	Q39191	O81820; Q56WT2; Q9LMP0	WAK1	PRO25	Arabidopsis thaliana (Mouse-ear cress)	3702
High	Master Protein	GLYMA_12G097500	K14009 - B-cell receptor-associated protein 31 (BCAP31, BAP31) (1 of 9)	0	3.492	4	1	6	1	221	25	9.03	7.03	1	0	1.185	0.91722	79.29	116.8	83.2	40.21	72.88	High	High	High	High	High	High	1		3	3	Present Both	1	GLYMA_12G097500	GLYMA_12G097500	sp|Q501B2|BZP16_ARATH	bZIP transcription factor 16 GN=BZIP16	ident:24/221 pos:34/221 query:221 hit:409 align:71 bit:33.1	Partial_match_both	bZIP transcription factor 16 (AtbZIP16)	na	BZP16_ARATH	Q501B2	O82288	BZIP16	na	Arabidopsis thaliana (Mouse-ear cress)	3702
High	Master Protein	GLYMA_05G219300	K14293 - importin subunit beta-1 (KPNB1) (1 of 3)	0	8.953	3	3	8	2	870	96.3	4.78	11.53	3	1	1.652	0.496134	55.77	76.1	123.9	4.72	13.99	High	Peak Found	Peak Found	High	High	High	1		3	3	Present Both	1	GLYMA_05G219300	GLYMA_05G219300	sp|Q9FJD4|IMB1_ARATH	Importin subunit beta-1 GN=KPNB1	ident:721/870 pos:791/870 query:870 hit:870 align:871 bit:1482.6	OK	Importin subunit beta-1	Karyopherin subunit beta-1 (ATKPNB1)	IMB1_ARATH	Q9FJD4	Q8GZ46	KPNB1	na	Arabidopsis thaliana (Mouse-ear cress)	3702
High	Master Protein	GLYMA_13G363900	K14309 - nuclear pore complex protein Nup93 (NUP93, NIC96) (1 of 2)	0	22.037	6	4	14	4	861	95.8	6.81	28.29	4	0	0.713	0.849629	17.62	91.7	108.3	25.65	32.67	High	High	High	High	High	High	1		3	3	Present Both	1	GLYMA_13G363900	GLYMA_13G363900	sp|O22224|NP93A_ARATH	Nuclear pore complex protein NUP93A GN=NUP93A	ident:649/861 pos:747/861 query:861 hit:861 align:861 bit:1347.4	OK	Nuclear pore complex protein NUP93A	Nucleoporin 93A	NP93A_ARATH	O22224	Q94CF2	NUP93A	na	Arabidopsis thaliana (Mouse-ear cress)	3702
High	Master Protein	GLYMA_03G019600	K14324 - histone deacetylase complex subunit SAP18 (SAP18) (1 of 1)	0	31.312	30	5	16	5	151	16.8	9.42	39.63	5	0	1.472	0.681783	53.73	59.2	140.8	37.42	36.16	High	High	High	High	High	High	1		3	3	Present Both	1	GLYMA_03G019600	GLYMA_03G019600	sp|O64644|SAP18_ARATH	Histone deacetylase complex subunit SAP18 GN=SAP12	ident:103/151 pos:121/151 query:151 hit:152 align:151 bit:195.7	OK	Histone deacetylase complex subunit SAP18	18 kDa Sin3-associated polypeptide	SAP18_ARATH	O64644	Q0WTU2; Q8L8K8	OrderedLocusNames=At2g45640	na	Arabidopsis thaliana (Mouse-ear cress)	3702
High	Master Protein	GLYMA_16G043700	K14641 - apyrase (APY1_2) (1 of 6)	0	23.209	4	1	4	1	469	50.9	6.47	13.66	1	0	0.632	0.705832	2.34	122.5	77.5	5.58		High	High	Not Found	Not Found	Peak Found	Not Found	1		2	1	Only Control	1	GLYMA_16G043700	GLYMA_16G043700	sp|Q9SPM5|APY2_ARATH	Apyrase 2 GN=APY2	ident:331/469 pos:389/469 query:469 hit:472 align:464 bit:655.2	OK	Apyrase 2 (AtAPY2)	ATP-diphosphatase; ATP-diphosphohydrolase; Adenosine diphosphatase (ADPase); NTPDase; Nucleoside triphosphate diphosphohydrolase 2	APY2_ARATH	Q9SPM5	F4JWK7; I1VCB1; Q8L704; Q9M7B3	APY2	na	Arabidopsis thaliana (Mouse-ear cress)	3702
High	Master Protein	GLYMA_13G081500.2.p	K14677 - aminoacylase (ACY1) (1 of 2)	0	101.866	39	12	32	12	446	49.6	6.21	89.33	12	0	0.76	0.899245	35.31	131.5	68.5	61.17	46.49	High	High	Peak Found	High	High	High	1		3	3	Present Both	1	GLYMA_13G081500.2.p	GLYMA_13G081500.2.p	sp|Q9C5C4|ARGE_ARATH	Acetylornithine deacetylase GN=ARF23	ident:88/446 pos:147/446 query:446 hit:440 align:384 bit:50.4	Poor_match	Acetylornithine deacetylase	N-acetylornithinase (AO; Acetylornithinase; NAO)	ARGE_ARATH	Q9C5C4	O23622; O49682	OrderedLocusNames=At4g17830	na	Arabidopsis thaliana (Mouse-ear cress)	3702
High	Master Protein	GLYMA_20G000500	K14677 - aminoacylase (ACY1) (1 of 2)	0	29.304	18	7	16	7	449	50	6.9	34.51	7	0	0.742	0.880381	45.83	140.8	59.2	48.12	56.86	High	High	High	High	High	High	1		3	3	Present Both	1	GLYMA_20G000500	GLYMA_20G000500	sp|Q8VXY9|UAH_ARATH	Ureidoglycolate hydrolase GN=UAH	ident:26/449 pos:38/449 query:449 hit:476 align:85 bit:38.5	Partial_match_both	Ureidoglycolate hydrolase (AtUAH)	Allantoate amidohydrolase 2 (AtAHH2); Ureidoglycolate amidohydrolase	UAH_ARATH	Q8VXY9	Q9FIY0	UAH	AAH2	Arabidopsis thaliana (Mouse-ear cress)	3702
High	Master Protein	GLYMA_05G243800	K14753 - guanine nucleotide-binding protein subunit beta-2-like 1 protein (RACK1) (1 of 3)	0	168.222	24	8	46	8	325	35.6	7.72	203.07	8	0	0.904	0.991598	73.42	53.6	146.4	91.06	67.78	High	High	High	High	High	High	1		3	3	Present Both	1	GLYMA_05G243800	GLYMA_05G243800	sp|Q9LV28|GPLPC_ARATH	Receptor for activated C kinase 1C GN=RACK1C	ident:282/325 pos:305/325 query:325 hit:326 align:326 bit:587.8	OK	Receptor for activated C kinase 1C	Guanine nucleotide-binding protein subunit beta-like protein C	GPLPC_ARATH	Q9LV28	na	RACK1C	na	Arabidopsis thaliana (Mouse-ear cress)	3702
Medium	Master Protein	GLYMA_08G231300.2.p	K14807 - ATP-dependent RNA helicase DDX51/DBP6 [EC:3.6.4.13] (DDX51, DBP6) (1 of 2)	0.015	1.546	2	1	2	1	617	69.4	9.14	0	1	0	0.01	9.48889e-17		200		1.11		High	High	Not Found	Not Found	Not Found	Not Found	1		2	0	Only Control	1	GLYMA_08G231300.2.p	GLYMA_08G231300.2.p	sp|Q7FGZ2|RH1_ARATH	DEAD-box ATP-dependent RNA helicase 1 GN=RH1	ident:278/617 pos:348/617 query:617 hit:522 align:500 bit:527.3	Poor_match	DEAD-box ATP-dependent RNA helicase 1	na	RH1_ARATH	Q7FGZ2	O22679; O23251	RH1	na	Arabidopsis thaliana (Mouse-ear cress)	3702
High	Master Protein	GLYMA_10G198300	K14944 - RNA-binding protein Nova (NOVA) (1 of 2)	0	50.807	24	6	22	6	337	36.3	6.71	50.6	6	0	1.196	0.906252	51.31	100.5	99.5	38.19	5.1	High	High	High	High	High	High	1		3	3	Present Both	1	GLYMA_10G198300	GLYMA_10G198300	sp|Q9LZ82|BTR1_ARATH	Protein BTR1 GN=BTR1	ident:220/337 pos:266/337 query:337 hit:313 align:333 bit:437.2	OK	Protein BTR1	Binding to ToMV RNA 1	BTR1_ARATH	Q9LZ82	B9DH67; F4JW99	BTR1	na	Arabidopsis thaliana (Mouse-ear cress)	3702
High	Master Protein	GLYMA_13G114300	K15028 - translation initiation factor 3 subunit K (EIF3K) (1 of 2)	0	17.523	6	1	8	1	229	26.2	5.64	18.79	1	0	1.127	0.940144	1.22	94	106		58.95	High	High	High	High	High	High	1		3	3	Present Both	1	GLYMA_13G114300	GLYMA_13G114300	sp|Q9SZA3|EIF3K_ARATH	Eukaryotic translation initiation factor 3 subunit K GN=TIF3K1	ident:170/229 pos:200/229 query:229 hit:226 align:231 bit:356.3	OK	Eukaryotic translation initiation factor 3 subunit K (eIF3k)	eIF-3 p25	EIF3K_ARATH	Q9SZA3	na	TIF3K1	na	Arabidopsis thaliana (Mouse-ear cress)	3702
High	Master Protein	GLYMA_04G080800	K15029 - translation initiation factor 3 subunit L (EIF3L) (1 of 2)	0	28	8	3	10	3	514	60.5	6.19	27.42	3	0	0.772	0.911216	32.85	83.8	116.2	109.01	29.47	High	Peak Found	Peak Found	High	High	High	1		3	3	Present Both	1	GLYMA_04G080800	GLYMA_04G080800	sp|Q8LB10|CLPR4_ARATH	ATP-dependent Clp protease proteolytic subunit-related protein 4, chloroplastic GN=CLPR4	ident:18/514 pos:21/514 query:514 hit:305 align:40 bit:30.0	Partial_match_both	ATP-dependent Clp protease proteolytic subunit-related protein 4, chloroplastic (ClpR4)	Protein HAPPY ON NORFLURAZON 5	CLPR4_ARATH	Q8LB10	O23548; Q8RXG1	CLPR4	na	Arabidopsis thaliana (Mouse-ear cress)	3702
High	Master Protein	GLYMA_13G055200	K15030 - translation initiation factor 3 subunit M (EIF3M) (1 of 3)	0	35.224	7	3	10	2	410	46.3	5.01	48.59	3	1	1.131	0.940098	26.34	74.4	125.6		20.84	High	High	High	High	High	High	1		3	3	Present Both	1	GLYMA_13G055200	GLYMA_13G055200	sp|Q8RWF0|PS13A_ARATH	26S proteasome non-ATPase regulatory subunit 13 homolog A GN=RPN9A	ident:35/410 pos:76/410 query:410 hit:386 align:141 bit:48.9	Partial_match_both	26S proteasome non-ATPase regulatory subunit 13 homolog A	26S proteasome regulatory subunit RPN9a (AtRNP9a); 26S proteasome regulatory subunit S11 homolog A	PS13A_ARATH	Q8RWF0	Q9FK79	RPN9A	na	Arabidopsis thaliana (Mouse-ear cress)	3702
High	Master Protein	GLYMA_19G101100.2.p	K15102 - solute carrier family 25 (mitochondrial phosphate transporter), member 3 (SLC25A3, PHC, PIC) (1 of 7)	0	71.136	24	8	33	3	375	39.8	9.26	101.7	8	5	0.771	0.910643	33.55	120.8	79.2	16.99	33.58	High	High	High	High	High	High	1		3	3	Present Both	1	GLYMA_19G101100.2.p	GLYMA_19G101100.2.p	sp|Q9FMU6|MPCP3_ARATH	Mitochondrial phosphate carrier protein 3, mitochondrial GN=MPT3	ident:295/375 pos:323/375 query:375 hit:375 align:376 bit:578.2	OK	Mitochondrial phosphate carrier protein 3, mitochondrial	Mitochondrial phosphate transporter 3 (MPT3); Phosphate transporter 3;1	MPCP3_ARATH	Q9FMU6	O80415; Q56WI0	MPT3	AT5; PHT3	Arabidopsis thaliana (Mouse-ear cress)	3702
High	Master Protein	GLYMA_11G234500	K15296 - alpha-soluble NSF attachment protein (NAPA, SNAPA, SEC17) (1 of 5)	0	4.369	4	1	3	1	289	32.6	5.16	6.26	1	0	0.674	0.804361	30.79	119.4	80.6	4.17	90.64	High	High	Peak Found	Peak Found	High	Peak Found	1		3	3	Present Both	1	GLYMA_11G234500	GLYMA_11G234500	sp|Q9SPE6|SNAA2_ARATH	Alpha-soluble NSF attachment protein 2 GN=ASNAP2	ident:220/289 pos:259/289 query:289 hit:289 align:289 bit:434.1	OK	Alpha-soluble NSF attachment protein 2 (Alpha-SNAP2)	N-ethylmaleimide-sensitive factor attachment protein alpha 2	SNAA2_ARATH	Q9SPE6	na	ASNAP2	ASNAP	Arabidopsis thaliana (Mouse-ear cress)	3702
High	Master Protein	GLYMA_07G007000	K15718 - linoleate 9S-lipoxygenase (LOX1_5) (1 of 21)	0	882.326	57	59	418	48	864	96.8	6.15	1318.4	59	13	0.959	1	56.85	90.9	109.1	36.59	16.71	High	High	High	High	High	High	1		3	3	Present Both	1	GLYMA_07G007000	GLYMA_07G007000	sp|Q06327|LOX1_ARATH	Linoleate 9S-lipoxygenase 1 GN=LOX1	ident:484/864 pos:623/864 query:864 hit:859 align:869 bit:983.4	OK	Linoleate 9S-lipoxygenase 1	Lipoxygenase 1 (AtLOX1)	LOX1_ARATH	Q06327	Q9FZ30	LOX1	na	Arabidopsis thaliana (Mouse-ear cress)	3702
High	Master Protein	GLYMA_13G347700	K15718 - linoleate 9S-lipoxygenase (LOX1_5) (1 of 21)	0	860.104	61	61	436	16	853	96.4	6.1	1436	61	48	0.767	0.90559	38.55	100	100	33.76	8.26	High	High	High	High	High	High	1		3	3	Present Both	1	GLYMA_13G347700	GLYMA_13G347700	sp|Q06327|LOX1_ARATH	Linoleate 9S-lipoxygenase 1 GN=LOX1	ident:501/853 pos:650/853 query:853 hit:859 align:861 bit:1016.5	OK	Linoleate 9S-lipoxygenase 1	Lipoxygenase 1 (AtLOX1)	LOX1_ARATH	Q06327	Q9FZ30	LOX1	na	Arabidopsis thaliana (Mouse-ear cress)	3702
High	Master Protein	GLYMA_15G026500	K15718 - linoleate 9S-lipoxygenase (LOX1_5) (1 of 21)	0	647.47	45	46	358	1	853	96.6	6.07	1133.85	46	4	0.728	0.870366	11.84	107.2	92.8	42.06	14.76	High	High	Peak Found	Peak Found	High	High	1		3	3	Present Both	1	GLYMA_15G026500	GLYMA_15G026500	sp|Q06327|LOX1_ARATH	Linoleate 9S-lipoxygenase 1 GN=LOX1	ident:498/853 pos:647/853 query:853 hit:859 align:861 bit:1012.7	OK	Linoleate 9S-lipoxygenase 1	Lipoxygenase 1 (AtLOX1)	LOX1_ARATH	Q06327	Q9FZ30	LOX1	na	Arabidopsis thaliana (Mouse-ear cress)	3702
High	Master Protein	GLYMA_15G026400	K15718 - linoleate 9S-lipoxygenase (LOX1_5) (1 of 21)	0	531.599	46	41	297	6	856	96.3	6.81	953.59	41	7	1.016	0.991598	65.17	105.8	94.2	5.33	41.47	High	High	High	High	High	High	1		3	3	Present Both	1	GLYMA_15G026400	GLYMA_15G026400	sp|Q06327|LOX1_ARATH	Linoleate 9S-lipoxygenase 1 GN=LOX1	ident:494/856 pos:651/856 query:856 hit:859 align:879 bit:1000.4	OK	Linoleate 9S-lipoxygenase 1	Lipoxygenase 1 (AtLOX1)	LOX1_ARATH	Q06327	Q9FZ30	LOX1	na	Arabidopsis thaliana (Mouse-ear cress)	3702
High	Master Protein	GLYMA_13G347800	K15718 - linoleate 9S-lipoxygenase (LOX1_5) (1 of 21)	0	425.896	35	35	235	1	822	92.7	7.01	716.35	35	0	0.475	0.286725	9.39	131.6	68.4	39.69	18.16	High	High	Peak Found	Peak Found	Peak Found	Not Found	1		3	2	Present Both	1	GLYMA_13G347800	GLYMA_13G347800	sp|Q06327|LOX1_ARATH	Linoleate 9S-lipoxygenase 1 GN=LOX1	ident:460/822 pos:611/822 query:822 hit:859 align:840 bit:928.3	OK	Linoleate 9S-lipoxygenase 1	Lipoxygenase 1 (AtLOX1)	LOX1_ARATH	Q06327	Q9FZ30	LOX1	na	Arabidopsis thaliana (Mouse-ear cress)	3702
High	Master Protein	GLYMA_08G189500	K15718 - linoleate 9S-lipoxygenase (LOX1_5) (1 of 21)	0	120.383	15	12	84	2	867	97.7	6	230.06	12	3	0.894	0.98584	51	90.4	109.6	64.26	66.41	High	High	High	High	Not Found	High	1		3	2	Present Both	1	GLYMA_08G189500	GLYMA_08G189500	sp|Q06327|LOX1_ARATH	Linoleate 9S-lipoxygenase 1 GN=LOX1	ident:487/867 pos:635/867 query:867 hit:859 align:872 bit:999.2	OK	Linoleate 9S-lipoxygenase 1	Lipoxygenase 1 (AtLOX1)	LOX1_ARATH	Q06327	Q9FZ30	LOX1	na	Arabidopsis thaliana (Mouse-ear cress)	3702
High	Master Protein	GLYMA_07G006900	K15718 - linoleate 9S-lipoxygenase (LOX1_5) (1 of 21)	0	96.911	13	13	65	2	859	96.3	6.7	156.85	13	2	1.59	0.554856	60.09	72.5	127.5	34.24	42.54	High	Not Found	High	High	Not Found	High	1		2	2	Present Both	1	GLYMA_07G006900	GLYMA_07G006900	sp|Q06327|LOX1_ARATH	Linoleate 9S-lipoxygenase 1 GN=LOX1	ident:488/859 pos:630/859 query:859 hit:859 align:879 bit:981.1	OK	Linoleate 9S-lipoxygenase 1	Lipoxygenase 1 (AtLOX1)	LOX1_ARATH	Q06327	Q9FZ30	LOX1	na	Arabidopsis thaliana (Mouse-ear cress)	3702
High	Master Protein	GLYMA_08G189600	K15718 - linoleate 9S-lipoxygenase (LOX1_5) (1 of 21)	0	29.455	8	5	10	5	866	97.1	6.44	19.15	5	0	0.554	0.490033	5.84	79.6	120.4	61.36	33.75	High	Peak Found	High	High	High	High	1		3	3	Present Both	1	GLYMA_08G189600	GLYMA_08G189600	sp|Q06327|LOX1_ARATH	Linoleate 9S-lipoxygenase 1 GN=LOX1	ident:503/866 pos:644/866 query:866 hit:859 align:868 bit:1023.9	OK	Linoleate 9S-lipoxygenase 1	Lipoxygenase 1 (AtLOX1)	LOX1_ARATH	Q06327	Q9FZ30	LOX1	na	Arabidopsis thaliana (Mouse-ear cress)	3702
High	Master Protein	GLYMA_10G294300	K16546 - FGFR1 oncogene partner (FGFR10P) (1 of 2)	0	17.942	13	2	4	2	265	29.9	5.6	17.57	2	0	0.892	0.98584	33.82	105.7	94.3	69.97		High	High	Peak Found	High	High	Not Found	1		3	2	Present Both	1	GLYMA_10G294300	GLYMA_10G294300	sp|Q9FQ24|TON1B_ARATH	Protein TONNEAU 1b GN=TON1B	ident:178/265 pos:213/265 query:265 hit:257 align:260 bit:354.4	OK	Protein TONNEAU 1b	na	TON1B_ARATH	Q9FQ24	Q9FQ23; Q9SV48	TON1B	na	Arabidopsis thaliana (Mouse-ear cress)	3702
High	Master Protein	GLYMA_20G244200	K16546 - FGFR1 oncogene partner (FGFR10P) (1 of 2)	0	6.491	6	1	5	1	264	29.8	5.92	9.43	1	0	0.72	0.85976	3.5	116.3	83.7	0.29	6.45	High	High	Not Found	High	High	High	1		2	3	Present Both	1	GLYMA_20G244200	GLYMA_20G244200	sp|Q9FQ24|TON1B_ARATH	Protein TONNEAU 1b GN=TON1B	ident:178/264 pos:213/264 query:264 hit:257 align:264 bit:349.4	OK	Protein TONNEAU 1b	na	TON1B_ARATH	Q9FQ24	Q9FQ23; Q9SV48	TON1B	na	Arabidopsis thaliana (Mouse-ear cress)	3702
High	Master Protein	GLYMA_13G296900	K16900 - two pore calcium channel protein, plant (TPC1, CCH1) (1 of 2)	0	15.668	2	1	6	1	738	85.7	5.12	16.89	1	0	0.945	0.999223	15.33	100.5	99.5	15.7	7.58	High	High	Not Found	High	High	High	1	Acetyl [N-Term]	2	3	Present Both	1	GLYMA_13G296900	GLYMA_13G296900	sp|Q94KI8|TPC1_ARATH	Two pore calcium channel protein 1 GN=TPC1	ident:487/738 pos:605/738 query:738 hit:733 align:738 bit:1022.7	OK	Two pore calcium channel protein 1	Calcium channel protein 1 (AtCCH1); Fatty acid oxygenation up-regulated protein 2; Voltage-dependent calcium channel protein TPC1 (AtTPC1)	TPC1_ARATH	Q94KI8	Q948T1; Q9ZT83	TPC1	CCH1; FOU2	Arabidopsis thaliana (Mouse-ear cress)	3702
High	Master Protein	GLYMA_13G256100	K17065 - dynamin 1-like protein (DNM1L) (1 of 5)	0	40.566	10	7	20	4	826	90.9	6.99	57.82	7	2	0.602	0.618929	23.57	123.7	76.3	19.64	62.79	High	High	High	High	High	High	1		3	3	Present Both	1	GLYMA_13G256100	GLYMA_13G256100	sp|Q8S944|DRP3A_ARATH	Dynamin-related protein 3A GN=DRP3A	ident:562/826 pos:647/826 query:826 hit:808 align:739 bit:1164.8	OK	Dynamin-related protein 3A	Dynamin-like protein 2; Dynamin-like protein 2a	DRP3A_ARATH	Q8S944	O22403; O81882; Q94CF3	DRP3A	ADL2; ADL2A	Arabidopsis thaliana (Mouse-ear cress)	3702
High	Master Protein	GLYMA_06G317500	K17080 - prohibitin 1 (PHB1) (1 of 3)	0	515.52	89	25	232	5	279	30.3	8.37	991.55	25	24	0.759	0.899182	32.4	104.9	95.1	23.77	8.85	High	High	High	High	High	High	1		3	3	Present Both	1	GLYMA_06G317500	GLYMA_06G317500	sp|O04331|PHB3_ARATH	Prohibitin-3, mitochondrial GN=PHB3	ident:228/279 pos:259/279 query:279 hit:277 align:275 bit:479.9	OK	Prohibitin-3, mitochondrial (Atphb3)	Protein ENHANCED ETHYLENE RESPONSE 3	PHB3_ARATH	O04331	na	PHB3	EER3	Arabidopsis thaliana (Mouse-ear cress)	3702
High	Master Protein	GLYMA_04G131800.2.p	K17080 - prohibitin 1 (PHB1) (1 of 3)	0	511.686	89	24	224	4	279	30.4	8.35	972.84	24	0	0.486	0.320756	1.72	137	63	29.18	21.84	High	High	High	High	High	High	1		3	3	Present Both	1	GLYMA_04G131800.2.p	GLYMA_04G131800.2.p	sp|O04331|PHB3_ARATH	Prohibitin-3, mitochondrial GN=PHB3	ident:226/279 pos:257/279 query:279 hit:277 align:275 bit:474.9	OK	Prohibitin-3, mitochondrial (Atphb3)	Protein ENHANCED ETHYLENE RESPONSE 3	PHB3_ARATH	O04331	na	PHB3	EER3	Arabidopsis thaliana (Mouse-ear cress)	3702
High	Master Protein	GLYMA_08G232000	K17080 - prohibitin 1 (PHB1) (1 of 3)	0	394.726	79	22	180	7	280	30.5	8.35	718.74	22	0	0.863	0.976873	27.71	105.9	94.1	1.08	20.03	High	High	High	High	High	High	1		3	3	Present Both	1	GLYMA_08G232000	GLYMA_08G232000	sp|O04331|PHB3_ARATH	Prohibitin-3, mitochondrial GN=PHB3	ident:230/280 pos:263/280 query:280 hit:277 align:276 bit:486.5	OK	Prohibitin-3, mitochondrial (Atphb3)	Protein ENHANCED ETHYLENE RESPONSE 3	PHB3_ARATH	O04331	na	PHB3	EER3	Arabidopsis thaliana (Mouse-ear cress)	3702
High	Master Protein	GLYMA_12G207500	K17081 - prohibitin 2 (PHB2) (1 of 4)	0	229.606	59	18	100	5	336	37.1	9.63	339.15	18	12	0.873	0.976873	31.49	105.8	94.2	39.57	7.3	High	High	High	High	High	High	1		3	3	Present Both	1	GLYMA_12G207500	GLYMA_12G207500	sp|Q9ZNT7|PHB2_ARATH	Prohibitin-2, mitochondrial GN=PHB2	ident:236/336 pos:267/336 query:336 hit:286 align:282 bit:477.6	OK	Prohibitin-2, mitochondrial (Atphb2)	na	PHB2_ARATH	Q9ZNT7	F4I2J2	PHB2	na	Arabidopsis thaliana (Mouse-ear cress)	3702
High	Master Protein	GLYMA_09G173500	K17081 - prohibitin 2 (PHB2) (1 of 4)	0	227.672	71	18	109	5	289	31.8	9.72	398.25	18	0	0.723	0.865618	25.75	77.9	122.1	51.35	47.82	High	High	High	High	High	High	1		3	3	Present Both	1	GLYMA_09G173500	GLYMA_09G173500	sp|Q9ZNT7|PHB2_ARATH	Prohibitin-2, mitochondrial GN=PHB2	ident:236/289 pos:268/289 query:289 hit:286 align:282 bit:480.7	OK	Prohibitin-2, mitochondrial (Atphb2)	na	PHB2_ARATH	Q9ZNT7	F4I2J2	PHB2	na	Arabidopsis thaliana (Mouse-ear cress)	3702
High	Master Protein	GLYMA_11G109400	K17081 - prohibitin 2 (PHB2) (1 of 4)	0	206.846	60	14	82	4	289	31.8	9.42	313.15	14	3	0.996	0.999223	36.65	74.7	125.3	60.07	39.31	High	High	High	High	High	High	1		3	3	Present Both	1	GLYMA_11G109400	GLYMA_11G109400	sp|Q9SIL6|PHB6_ARATH	Prohibitin-6, mitochondrial GN=PHB6	ident:237/289 pos:264/289 query:289 hit:286 align:289 bit:466.1	OK	Prohibitin-6, mitochondrial (Atphb6)	na	PHB6_ARATH	Q9SIL6	na	PHB6	na	Arabidopsis thaliana (Mouse-ear cress)	3702
High	Master Protein	GLYMA_13G199800	K17095 - annexin A7/11 (ANXA7_11) (1 of 9)	0	197.441	57	21	100	6	313	35.7	7.31	252.16	21	15	1.152	0.928395	44.67	87.4	112.6	22.41	14.96	High	High	High	High	High	High	1		3	3	Present Both	1	GLYMA_13G199800	GLYMA_13G199800	sp|Q94CK4|ANXD8_ARATH	Annexin D8 GN=ANNAT8	ident:177/313 pos:243/313 query:313 hit:316 align:311 bit:371.7	OK	Annexin D8	AnnAt8	ANXD8_ARATH	Q94CK4	na	ANNAT8	ANN8	Arabidopsis thaliana (Mouse-ear cress)	3702
High	Master Protein	GLYMA_08G136200	K17095 - annexin A7/11 (ANXA7_11) (1 of 9)	0	92.624	47	11	29	10	315	35.6	6.46	80.17	11	0	0.876	0.976873	62.82	122.2	77.8	39.97	55.8	High	High	Peak Found	High	High	High	1		3	3	Present Both	1	GLYMA_08G136200	GLYMA_08G136200	sp|Q9XEE2|ANXD2_ARATH	Annexin D2 GN=ANN2	ident:232/315 pos:276/315 query:315 hit:317 align:316 bit:493.8	OK	Annexin D2	AnnAt2	ANXD2_ARATH	Q9XEE2	Q42063	ANN2	ANNAT2	Arabidopsis thaliana (Mouse-ear cress)	3702
High	Master Protein	GLYMA_13G200000	K17099 - annexin A13 (ANXA13) (1 of 2)	0	12.368	7	2	7	2	314	36.1	8.13	6.23	2	0	0.849	0.964419	19.49	90.6	109.4	19.38	31.28	High	High	High	High	High	High	1		3	3	Present Both	1	GLYMA_13G200000	GLYMA_13G200000	sp|Q9ZVJ6|ANXD4_ARATH	Annexin D4 GN=ANN4	ident:177/314 pos:234/314 query:314 hit:319 align:318 bit:348.2	OK	Annexin D4	AnnAt4	ANXD4_ARATH	Q9ZVJ6	na	ANN4	ANNAT4	Arabidopsis thaliana (Mouse-ear cress)	3702
High	Master Protein	GLYMA_09G030400	K17268 - coatomer protein complex, subunit epsilon (COPE) (1 of 2)	0	4.196	3	1	3	1	290	32.3	5.57	6.67	1	0	2.054	0.228603	13.13	66.1	133.9	57.5	7.23	High	High	Peak Found	Peak Found	High	Peak Found	1		3	3	Present Both	1	GLYMA_09G030400	GLYMA_09G030400	sp|Q9SA78|COPE1_ARATH	Coatomer subunit epsilon-1 GN=GDH2	ident:222/290 pos:260/290 query:290 hit:292 align:289 bit:481.9	OK	Coatomer subunit epsilon-1	Epsilon-coat protein 1 (Epsilon-COP 1)	COPE1_ARATH	Q9SA78	Q8LB21	OrderedLocusNames=At1g30630	na	Arabidopsis thaliana (Mouse-ear cress)	3702
High	Master Protein	GLYMA_19G077100	K17435 - large subunit ribosomal protein L54 (MRPL54) (1 of 2)	0	29.097	22	3	22	3	131	14.6	10.04	45.41	3	0	1.138	0.935704	46.53	87	113	16.68	9.94	High	High	High	High	High	High	1		3	3	Present Both	1	GLYMA_19G077100	GLYMA_19G077100	sp|Q9LS44|PCR4_ARATH	Protein PLANT CADMIUM RESISTANCE 4 GN=PCR4	ident:13/131 pos:17/131 query:131 hit:184 align:32 bit:29.3	Partial_match_both	Protein PLANT CADMIUM RESISTANCE 4 (AtPCR4)	na	PCR4_ARATH	Q9LS44	na	PCR4	na	Arabidopsis thaliana (Mouse-ear cress)	3702
High	Master Protein	GLYMA_12G241900	K17541 - SCY1-like protein 2 (SCYL2) (1 of 2)	0	19.617	5	3	8	3	928	100.6	7.25	20.86	3	0	0.467	0.273114	12.13	114.9	85.1	26.48	48.62	High	High	High	High	High	High	1		3	3	Present Both	1	GLYMA_12G241900	GLYMA_12G241900	sp|Q94C95|ATG1A_ARATH	Serine/threonine-protein kinase ATG1a GN=ATG1A	ident:80/928 pos:135/928 query:928 hit:626 align:315 bit:71.6	Partial_match_both	Serine/threonine-protein kinase ATG1a	Autophagy-related protein 1a (AtAPG1a)	ATG1A_ARATH	Q94C95	Q9M269	ATG1A	na	Arabidopsis thaliana (Mouse-ear cress)	3702
High	Master Protein	GLYMA_08G346200	K17732 - mitochondrial-processing peptidase subunit beta [EC:3.4.24.64] (PMPCB, MAS1) (1 of 3)	0	325.808	49	27	139	9	528	58.9	6.98	432.1	27	17	1.161	0.92137	60.52	80.4	119.6	32.51	22.8	High	High	High	High	High	High	1		3	3	Present Both	1	GLYMA_08G346200	GLYMA_08G346200	sp|Q42290|MPPB_ARATH	Probable mitochondrial-processing peptidase subunit beta, mitochondrial GN=MORF8	ident:415/528 pos:470/528 query:528 hit:531 align:534 bit:878.2	OK	Probable mitochondrial-processing peptidase subunit beta, mitochondrial	Beta-MPP	MPPB_ARATH	Q42290	Q0WWT6; Q9SGA7	OrderedLocusNames=At3g02090	na	Arabidopsis thaliana (Mouse-ear cress)	3702
High	Master Protein	GLYMA_16G087200	K17732 - mitochondrial-processing peptidase subunit beta [EC:3.4.24.64] (PMPCB, MAS1) (1 of 3)	0	257.422	35	19	113	8	523	58.5	6.73	357.73	19	0	1.116	0.943109	39.44	74.1	125.9	18.46	34.34	High	High	High	High	High	High	1		3	3	Present Both	1	GLYMA_16G087200	GLYMA_16G087200	sp|Q42290|MPPB_ARATH	Probable mitochondrial-processing peptidase subunit beta, mitochondrial GN=MORF8	ident:409/523 pos:467/523 query:523 hit:531 align:531 bit:852.4	OK	Probable mitochondrial-processing peptidase subunit beta, mitochondrial	Beta-MPP	MPPB_ARATH	Q42290	Q0WWT6; Q9SGA7	OrderedLocusNames=At3g02090	na	Arabidopsis thaliana (Mouse-ear cress)	3702
High	Master Protein	GLYMA_18G156500	K17732 - mitochondrial-processing peptidase subunit beta [EC:3.4.24.64] (PMPCB, MAS1) (1 of 3)	0	228.781	45	23	114	5	527	58.8	6.99	328.75	23	0	1.388	0.777107	57.32	91.2	108.8	20.99	14.02	High	High	High	High	High	High	1		3	3	Present Both	1	GLYMA_18G156500	GLYMA_18G156500	sp|Q42290|MPPB_ARATH	Probable mitochondrial-processing peptidase subunit beta, mitochondrial GN=MORF8	ident:414/527 pos:470/527 query:527 hit:531 align:531 bit:870.9	OK	Probable mitochondrial-processing peptidase subunit beta, mitochondrial	Beta-MPP	MPPB_ARATH	Q42290	Q0WWT6; Q9SGA7	OrderedLocusNames=At3g02090	na	Arabidopsis thaliana (Mouse-ear cress)	3702
High	Master Protein	GLYMA_13G126900	K17769 - mitochondrial import receptor subunit TOM22 (TOM22) (1 of 4)	0	98.204	57	6	50	5	97	10.3	10.26	163.68	6	1	0.745	0.882627	37.77	129.9	70.1	61.1	22.71	High	High	High	High	High	High	1		3	3	Present Both	1	GLYMA_13G126900	GLYMA_13G126900	sp|Q9FNC9|TOM92_ARATH	Mitochondrial import receptor subunit TOM9-2 GN=TOM9-2	ident:60/97 pos:75/97 query:97 hit:99 align:94 bit:119.8	OK	Mitochondrial import receptor subunit TOM9-2	Mitochondrial import receptor subunit TOM22 homolog 2; Translocase of outer membrane 22 kDa subunit homolog 2; Translocase of outer membrane 9 kDa subunit TOM9-2	TOM92_ARATH	Q9FNC9	na	TOM9-2	TOM22-2	Arabidopsis thaliana (Mouse-ear cress)	3702
High	Master Protein	GLYMA_10G040200	K17769 - mitochondrial import receptor subunit TOM22 (TOM22) (1 of 4)	0	82.475	56	5	52	4	97	10.3	10.26	172.81	5	0	0.67	0.795692	27.19	143.2	56.8	50.84	37.26	High	High	High	High	High	High	1		3	3	Present Both	1	GLYMA_10G040200	GLYMA_10G040200	sp|Q9FNC9|TOM92_ARATH	Mitochondrial import receptor subunit TOM9-2 GN=TOM9-2	ident:59/97 pos:74/97 query:97 hit:99 align:94 bit:115.5	OK	Mitochondrial import receptor subunit TOM9-2	Mitochondrial import receptor subunit TOM22 homolog 2; Translocase of outer membrane 22 kDa subunit homolog 2; Translocase of outer membrane 9 kDa subunit TOM9-2	TOM92_ARATH	Q9FNC9	na	TOM9-2	TOM22-2	Arabidopsis thaliana (Mouse-ear cress)	3702
High	Master Protein	GLYMA_11G139400	K17777 - mitochondrial import inner membrane translocase subunit TIM9 (TIM9) (1 of 3)	0	164.226	62	8	88	8	93	10.8	7.21	292.68	8	0	0.761	0.899245	44.67	114	86	26.79	19.91	High	High	High	High	High	High	1	Acetyl [N-Term]	3	3	Present Both	1	GLYMA_11G139400	GLYMA_11G139400	sp|Q9XGX9|TIM9_ARATH	Mitochondrial import inner membrane translocase subunit TIM9 GN=TIM9	ident:75/93 pos:80/93 query:93 hit:93 align:93 bit:157.5	OK	Mitochondrial import inner membrane translocase subunit TIM9	Protein EMBRYO DEFECTIVE 2474	TIM9_ARATH	Q9XGX9	Q8L927; Q9SNC2	TIM9	EMB2474	Arabidopsis thaliana (Mouse-ear cress)	3702
High	Master Protein	GLYMA_03G082300	K17777 - mitochondrial import inner membrane translocase subunit TIM9 (TIM9) (1 of 3)	0	66.374	63	6	27	6	94	11.1	7.74	83.26	6	0	1.005	0.997622	62.67	115	85	45.17	15.73	High	High	High	High	High	High	1	Acetyl [N-Term]	3	3	Present Both	1	GLYMA_03G082300	GLYMA_03G082300	sp|Q9XGX9|TIM9_ARATH	Mitochondrial import inner membrane translocase subunit TIM9 GN=TIM9	ident:57/94 pos:80/94 query:94 hit:93 align:93 bit:132.9	OK	Mitochondrial import inner membrane translocase subunit TIM9	Protein EMBRYO DEFECTIVE 2474	TIM9_ARATH	Q9XGX9	Q8L927; Q9SNC2	TIM9	EMB2474	Arabidopsis thaliana (Mouse-ear cress)	3702
High	Master Protein	GLYMA_06G166600	K17780 - mitochondrial import inner membrane translocase subunit TIM8 (TIM8) (1 of 2)	0	37.917	51	4	30	1	78	8.9	5.01	58.98	4	0	1.275	0.85976	11.54	87.9	112.1	0.64	11.03	High	High	Not Found	High	Not Found	High	1	Acetyl [N-Term]	2	2	Present Both	1	GLYMA_06G166600	GLYMA_06G166600	sp|Q9XGY4|TIM8_ARATH	Mitochondrial import inner membrane translocase subunit TIM8 GN=TIM8	ident:49/78 pos:65/78 query:78 hit:77 align:74 bit:95.5	OK	Mitochondrial import inner membrane translocase subunit TIM8	na	TIM8_ARATH	Q9XGY4	na	TIM8	na	Arabidopsis thaliana (Mouse-ear cress)	3702
High	Master Protein	GLYMA_08G367400	K17781 - mitochondrial import inner membrane translocase subunit TIM13 (TIM13) (1 of 2)	0	82.295	62	6	39	3	86	9.4	8.18	128.54	6	3	0.834	0.950035	38.45	112.3	87.7	3.48	24.75	High	High	High	High	High	High	1	Acetyl [N-Term]	3	3	Present Both	1	GLYMA_08G367400	GLYMA_08G367400	sp|Q9XH48|TIM13_ARATH	Mitochondrial import inner membrane translocase subunit TIM13 GN=TIM13	ident:51/86 pos:67/86 query:86 hit:87 align:85 bit:85.9	OK	Mitochondrial import inner membrane translocase subunit TIM13	na	TIM13_ARATH	Q9XH48	Q94KC4; Q9SY93	TIM13	na	Arabidopsis thaliana (Mouse-ear cress)	3702
High	Master Protein	GLYMA_04G256400	K17784 - mitochondrial inner membrane organizing system protein 1 (MINOS1, MOS1) (1 of 2)	0	14.068	27	2	12	2	97	10.5	5.4	27.81	2	0	0.798	0.928495	16.87	117.5	82.5	4.09	28.71	High	High	High	High	High	High	1		3	3	Present Both	1	GLYMA_04G256400	GLYMA_04G256400	sp|Q67ZE1|HSDD2_ARATH	3beta-hydroxysteroid-dehydrogenase/decarboxylase isoform 2 GN=3BETAHSD/D2	ident:10/97 pos:19/97 query:97 hit:564 align:29 bit:27.3	Partial_match_both	3beta-hydroxysteroid-dehydrogenase/decarboxylase isoform 2 (At3BETAHSD/D2)	4alpha-carboxysterol-C3-dehydrogenase/C4-decarboxylase isoform 1-2; Reticulon-like protein B19 (AtRTNLB19); Sterol-4-alpha-carboxylate 3-dehydrogenase 2, decarboxylating	HSDD2_ARATH	Q67ZE1	O64845	3BETAHSD/D2	RTNLB19	Arabidopsis thaliana (Mouse-ear cress)	3702
High	Master Protein	GLYMA_01G007700	K17795 - mitochondrial import inner membrane translocase subunit TIM17 (TIM17) (1 of 3)	0	32.478	15	2	5	2	200	20.9	5.12	21.22	2	0	0.093	9.83982e-09	0.18	182.9	17.1		19.06	High	High	High	High	Peak Found	High	1		3	3	Present Both	1	GLYMA_01G007700	GLYMA_01G007700	sp|Q9SP35|TI172_ARATH	Mitochondrial import inner membrane translocase subunit TIM17-2 GN=TIM17-2	ident:150/200 pos:167/200 query:200 hit:243 align:243 bit:280.4	OK	Mitochondrial import inner membrane translocase subunit TIM17-2	na	TI172_ARATH	Q9SP35	Q9ZUS5	TIM17-2	na	Arabidopsis thaliana (Mouse-ear cress)	3702
High	Master Protein	GLYMA_20G215800	K17796 - mitochondrial import inner membrane translocase subunit TIM21 (TIM21) (1 of 2)	0	4.243	6	1	2	1	235	26.3	9.7	3.99	1	0	1.035	0.982544	12.14	95.1	104.9	11.85	15.64	High	Peak Found	Peak Found	Peak Found	Peak Found	High	1		3	3	Present Both	1	GLYMA_20G215800	GLYMA_20G215800	sp|Q1G3L1|TIM21_ARATH	Probable mitochondrial import inner membrane translocase subunit TIM21 GN=TIM21	ident:137/235 pos:161/235 query:235 hit:269 align:188 bit:261.5	OK	Probable mitochondrial import inner membrane translocase subunit TIM21	Protein SEGREGATION DISTORTION 3	TIM21_ARATH	Q1G3L1	na	TIM21	SD3	Arabidopsis thaliana (Mouse-ear cress)	3702
High	Master Protein	GLYMA_02G080100	K17805 - mitochondrial import inner membrane translocase subunit TIM16 (PAM16, TIM16) (1 of 3)	0	9.407	13	1	6	1	117	12.9	9.33	18.76	1	0	0.748	0.890646	13.23	108.8	91.2	14.36	19.37	High	High	High	High	High	High	1		3	3	Present Both	1	GLYMA_02G080100	GLYMA_02G080100	sp|Q93VV9|TM16B_ARATH	Mitochondrial import inner membrane translocase subunit PAM16 like 2 GN=PAM16L2	ident:85/117 pos:98/117 query:117 hit:116 align:115 bit:179.5	OK	Mitochondrial import inner membrane translocase subunit PAM16 like 2 (AtPAM16; AtPAM16L2)	Presequence translocated-associated motor subunit PAM16; Protein MUTANT SNC1-ENHANCING 5; Protein THAXTOMIN A RESISTANT 1	TM16B_ARATH	Q93VV9	Q9LX43	PAM16L2	na	Arabidopsis thaliana (Mouse-ear cress)	3702
High	Master Protein	GLYMA_07G189900.3.p	K17871 - NADH:ubiquinone reductase (non-electrogenic) (ndh1) (1 of 12)	0	45.538	5	2	15	2	580	65.2	7.65	42.07	2	0	0.606	0.628465	15.91	120.7	79.3	6.67	32.14	High	High	High	High	High	High	1		3	3	Present Both	1	GLYMA_07G189900.3.p	GLYMA_07G189900.3.p	sp|Q94BV7|NDB2_ARATH	External alternative NAD(P)H-ubiquinone oxidoreductase B2, mitochondrial GN=NDB2	ident:435/580 pos:501/580 query:580 hit:582 align:586 bit:896.3	OK	External alternative NAD(P)H-ubiquinone oxidoreductase B2, mitochondrial	External alternative NADH dehydrogenase NDB2; NADH:ubiquinone reductase (non-electrogenic) NDB2	NDB2_ARATH	Q94BV7	Q9S9T5	NDB2	na	Arabidopsis thaliana (Mouse-ear cress)	3702
High	Master Protein	GLYMA_08G072300	K17893 - ubiquinol oxidase (AOX1, AOX2) (1 of 4)	0.009	1.883	3	1	4	1	333	38.1	9.32	3.38	1	0	0.96	0.999223	79.82	143	57	55.93	66.63	High	High	Peak Found	Peak Found	High	High	1		3	3	Present Both	1	GLYMA_08G072300	GLYMA_08G072300	sp|O22049|AOX2_ARATH	Ubiquinol oxidase 2, mitochondrial GN=AOX2	ident:212/333 pos:244/333 query:333 hit:353 align:283 bit:456.1	OK	Ubiquinol oxidase 2, mitochondrial	Alternative oxidase 2	AOX2_ARATH	O22049	Q4PS98	AOX2	na	Arabidopsis thaliana (Mouse-ear cress)	3702
High	Master Protein	GLYMA_10G184900	K18151 - ureidoglycolate amidohydrolase (UAH) (1 of 1)	0	8.727	6	2	4	2	464	49.8	5.52	6.48	2	0	0.71	0.846615	33.34	131.4	68.6	39.47	55.02	High	High	Peak Found	Peak Found	High	Peak Found	1		3	3	Present Both	1	GLYMA_10G184900	GLYMA_10G184900	sp|Q8VXY9|UAH_ARATH	Ureidoglycolate hydrolase GN=UAH	ident:345/464 pos:389/464 query:464 hit:476 align:440 bit:683.3	OK	Ureidoglycolate hydrolase (AtUAH)	Allantoate amidohydrolase 2 (AtAHH2); Ureidoglycolate amidohydrolase	UAH_ARATH	Q8VXY9	Q9FIY0	UAH	AAH2	Arabidopsis thaliana (Mouse-ear cress)	3702
High	Master Protein	GLYMA_13G055400	K18635 - protein SPIRAL1 and related proteins (SPR1) (1 of 7)	0	6.96	25	2	4	2	136	13.5	9.33	6.15	2	0	0.453	0.242025	9.44	137.7	62.3	2.15	61.75	High	Peak Found	Not Found	High	Peak Found	High	1		2	3	Present Both	1	GLYMA_13G055400	GLYMA_13G055400	sp|B3H4F1|SP1L1_ARATH	Protein SPIRAL1-like 1 GN=SP1L1	ident:75/136 pos:80/136 query:136 hit:113 align:118 bit:122.5	OK	Protein SPIRAL1-like 1	na	SP1L1_ARATH	B3H4F1	Q9FZC2	SP1L1	na	Arabidopsis thaliana (Mouse-ear cress)	3702
High	Master Protein	GLYMA_12G022500	KOG0018//KOG0933//KOG0964//KOG4643 - Structural maintenance of chromosome protein 1 (sister chromatid cohesion complex Cohesin, subunit SMC1) // Structural maintenance of chromosome protein 2 (chromosome condensation complex Condensin, subunit E) // Structural maintenance of chromosome protein 3 (sister chromatid cohesion complex Cohesin, subunit SMC3) // Uncharacterized coiled-coil protein (1 of…	0	172.923	20	22	67	5	1357	153.5	4.72	163.87	22	0	1.108	0.946309	109.91	163.7	36.3	47.16	138.26	High	High	Peak Found	High	High	High	1		3	3	Present Both	1	GLYMA_12G022500	GLYMA_12G022500	sp|Q84TD8|FLXL2_ARATH	Protein FLX-like 2 GN=FLXL2	ident:37/1357 pos:84/1357 query:1357 hit:359 align:169 bit:37.0	Partial_match_both	Protein FLX-like 2 (AtFLXL2)	na	FLXL2_ARATH	Q84TD8	Q9ZW90	FLXL2	FLL2	Arabidopsis thaliana (Mouse-ear cress)	3702
Medium	Master Protein	GLYMA_19G211100	KOG0105 - Alternative splicing factor ASF/SF2 (RRM superfamily) (1 of 7)	0.022	1.31	3	1	3	1	313	35.3	10.26	0	1	0	0.936	0.999223	52.04	86.5	113.5	52.24	30.36	High	High	Peak Found	Peak Found	Peak Found	Peak Found	1		3	3	Present Both	1	GLYMA_19G211100	GLYMA_19G211100	sp|O22315|SR34_ARATH	Serine/arginine-rich-splicing factor SR34 GN=SR34	ident:187/313 pos:203/313 query:313 hit:303 align:249 bit:313.9	OK	Serine/arginine-rich-splicing factor SR34 (At-SR34; At-SRp34; AtSR34)	Pre-mRNA-splicing factor SF2; SR1 protein	SR34_ARATH	O22315	O22314; Q39201; Q564E1; Q8L7P1	SR34	SF2; SR1; SRP34	Arabidopsis thaliana (Mouse-ear cress)	3702
High	Master Protein	GLYMA_03G226400	KOG0278//KOG0315 - Serine/threonine kinase receptor-associated protein // G-protein beta subunit-like protein (contains WD40 repeats) (1 of 2)	0	60.249	8	6	16	6	1352	145.1	7.21	40.43	6	0	0.989	0.999223	34.44	86.7	113.3	11.23	27.67	High	High	Peak Found	High	High	High	1		3	3	Present Both	1	GLYMA_03G226400	GLYMA_03G226400	sp|Q8L828|COB23_ARATH	Coatomer subunit beta'-3 GN=DGK2	ident:67/1352 pos:110/1352 query:1352 hit:909 align:268 bit:43.9	Partial_match_both	Coatomer subunit beta'-3	Beta'-coat protein 3 (Beta'-COP 3)	COB23_ARATH	Q8L828	Q9LW87	OrderedLocusNames=At3g15980	na	Arabidopsis thaliana (Mouse-ear cress)	3702
High	Master Protein	GLYMA_11G096400	KOG0933//KOG4643 - Structural maintenance of chromosome protein 2 (chromosome condensation complex Condensin, subunit E) // Uncharacterized coiled-coil protein (1 of 1)	0	246.22	30	32	88	15	1357	153.2	4.7	217.06	32	12	1.27	0.865939	108.3	160.9	39.1	59.67	119.21	High	High	High	High	High	Peak Found	1	Acetyl [N-Term]	3	3	Present Both	1	GLYMA_11G096400	GLYMA_11G096400	sp|F4JZY1|CIP1_ARATH	COP1-interactive protein 1 GN=CIP1	ident:218/1357 pos:386/1357 query:1357 hit:1586 align:875 bit:45.8	Partial_match_hit	COP1-interactive protein 1	na	CIP1_ARATH	F4JZY1	Q38843; Q9FJ35	CIP1	na	Arabidopsis thaliana (Mouse-ear cress)	3702
High	Master Protein	GLYMA_06G080100	KOG1003 - Actin filament-coating protein tropomyosin (1 of 28)	0	170.092	34	18	81	18	446	50.8	9.29	274.76	18	0	0.652	0.750615	24.26	119.2	80.8	54.14	11.28	High	High	High	High	High	High	1		3	3	Present Both	1	GLYMA_06G080100	GLYMA_06G080100	sp|F4IJK6|KN14R_ARATH	Kinesin-like protein KIN-14R GN=KIN14R	ident:43/446 pos:84/446 query:446 hit:1083 align:167 bit:35.4	Partial_match_both	Kinesin-like protein KIN-14R	na	KN14R_ARATH	F4IJK6	F4IJK7; Q9ZQ52	KIN14R	na	Arabidopsis thaliana (Mouse-ear cress)	3702
Medium	Master Protein	GLYMA_13G186400	KOG2615 - Permease of the major facilitator superfamily (1 of 9)	0.025	1.252	1	1	5	1	498	54.8	8.09	6.97	1	0	1.994	0.259349	44.39	66.8	133.2	1.78	39.83	High	High	Not Found	High	High	High	1		2	3	Present Both	1	GLYMA_13G186400	GLYMA_13G186400	sp|Q94BZ1|ZIFL1_ARATH	Protein ZINC INDUCED FACILITATOR-LIKE 1 GN=ZIFL1	ident:284/498 pos:366/498 query:498 hit:478 align:493 bit:585.9	OK	Protein ZINC INDUCED FACILITATOR-LIKE 1	Protein ZIF-LIKE 1	ZIFL1_ARATH	Q94BZ1	C0Z283; Q2V381; Q56WZ9; Q8LC71; Q9FKI7	ZIFL1	na	Arabidopsis thaliana (Mouse-ear cress)	3702
High	Master Protein	GLYMA_07G026400	KOG2815 - Mitochondrial/choloroplast ribosomal protein S15 (1 of 1)	0	58.728	17	4	12	4	391	44.3	10.01	41.86	4	0	1.262	0.870366	0.74	88.4	111.6		0.71	High	Not Found	Peak Found	High	High	High	1		2	3	Present Both	1	GLYMA_07G026400	GLYMA_07G026400	sp|P56805|RR15_ARATH	30S ribosomal protein S15, chloroplastic GN=rps15	ident:24/391 pos:42/391 query:391 hit:88 align:67 bit:42.0	Partial_match_query	30S ribosomal protein S15, chloroplastic	na	RR15_ARATH	P56805	na	rps15	na	Arabidopsis thaliana (Mouse-ear cress)	3702
High	Master Protein	GLYMA_20G006500	KOG2992 - Nucleolar GTPase/ATPase p130 (1 of 1)	0	16.83	4	4	7	4	1501	161.1	4.51	13.16	4	0	0.44	0.210495	3.39	170	30	48.21		High	High	Peak Found	High	High	High	1		3	3	Present Both	1	GLYMA_20G006500	GLYMA_20G006500	sp|O23144|PPI1_ARATH	Proton pump-interactor 1 GN=PPI1	ident:126/1501 pos:215/1501 query:1501 hit:612 align:457 bit:110.5	Partial_match_query	Proton pump-interactor 1	na	PPI1_ARATH	O23144	B9DFB6; Q9SZS5	PPI1	na	Arabidopsis thaliana (Mouse-ear cress)	3702
High	Master Protein	GLYMA_06G066400	KOG3306 - Predicted membrane protein (1 of 2)	0	75.703	44	11	53	1	209	23.3	8.76	129.33	11	0	0.372	0.0839492	3.89	144.9	55.1	34.97	12.06	High	High	High	High	Not Found	High	1		3	2	Present Both	1	GLYMA_06G066400	GLYMA_06G066400	sp|Q8VY97|Y4213_ARATH	ER membrane protein complex subunit 7 homolog GN=CBSCBSPB1	ident:129/209 pos:151/209 query:209 hit:202 align:177 bit:252.3	OK	ER membrane protein complex subunit 7 homolog	na	Y4213_ARATH	Q8VY97	O49379	OrderedLocusNames=At4g32130	na	Arabidopsis thaliana (Mouse-ear cress)	3702
High	Master Protein	GLYMA_02G058200	KOG3377 - Uncharacterized conserved protein (1 of 7)	0	43.049	28	2	15	2	151	17.3	6.09	57.46	2	0	0.835	0.950035	28.15	124.6	75.4	54.8	59.32	High	High	Peak Found	High	High	High	1	Acetyl [N-Term]	3	3	Present Both	1	GLYMA_02G058200	GLYMA_02G058200	sp|Q948R1|PLA11_ARATH	Phospholipase A(1) DAD1, chloroplastic GN=DAD1	ident:30/151 pos:54/151 query:151 hit:447 align:130 bit:28.1	Partial_match_hit	Phospholipase A(1) DAD1, chloroplastic	Phospholipase A1-Ibeta1; Protein DEFECTIVE IN ANTHER DEHISCENCE 1 (AtDAD1)	PLA11_ARATH	Q948R1	F4IV22; O22170	DAD1	na	Arabidopsis thaliana (Mouse-ear cress)	3702
High	Master Protein	GLYMA_16G080800	KOG3399 - Predicted Yippee-type zinc-binding protein (1 of 18)	0.001	3	7	1	3	1	107	12.2	9.26	6.06	1	0	0.803	0.934958	4.62	110.9	89.1	53.06		High	High	Peak Found	Not Found	Peak Found	Not Found	1		3	1	Only Control	1	GLYMA_16G080800	GLYMA_16G080800	sp|Q9T096|YIPL6_ARATH	Protein yippee-like At4g27745 GN=YAB5	ident:54/107 pos:74/107 query:107 hit:106 align:97 bit:124.0	Poor_match	Protein yippee-like At4g27745	na	YIPL6_ARATH	Q9T096	Q2V3E1	OrderedLocusNames=At4g27745	na	Arabidopsis thaliana (Mouse-ear cress)	3702
High	Master Protein	GLYMA_15G139900	KOG3450 - Huntingtin interacting protein HYPK (1 of 4)	0	187.673	93	10	47	4	110	12.2	5.08	217.93	10	5	1.699	0.461031	54.07	54.4	145.6	53.35	59.93	High	Peak Found	High	High	High	High	1	Acetyl [N-Term]	3	3	Present Both	1	GLYMA_15G139900	GLYMA_15G139900	sp|Q38932|LCYE_ARATH	Lycopene epsilon cyclase, chloroplastic GN=LUT2	ident:20/110 pos:34/110 query:110 hit:524 align:61 bit:28.9	Partial_match_hit	Lycopene epsilon cyclase, chloroplastic	Protein LUTEIN DEFICIENT 2	LCYE_ARATH	Q38932	Q9LDV8	LUT2	na	Arabidopsis thaliana (Mouse-ear cress)	3702
High	Master Protein	GLYMA_09G035300	KOG3450 - Huntingtin interacting protein HYPK (1 of 4)	0	116.284	84	8	38	6	110	12.2	5.07	149.97	8	0	0.973	0.999223	66.9	95.6	104.4	47.52	52.27	High	High	High	High	High	High	1	Acetyl [N-Term]	3	3	Present Both	1	GLYMA_09G035300	GLYMA_09G035300	sp|Q9M3D6|AB19G_ARATH	ABC transporter G family member 19 GN=ABCG19	ident:16/110 pos:26/110 query:110 hit:725 align:51 bit:27.3	Partial_match_both	ABC transporter G family member 19 (ABC transporter ABCG.19; AtABCG19)	White-brown complex homolog protein 19 (AtWBC19)	AB19G_ARATH	Q9M3D6	na	ABCG19	WBC19	Arabidopsis thaliana (Mouse-ear cress)	3702
High	Master Protein	GLYMA_13G047900	KOG4002 - Uncharacterized integral membrane protein (1 of 1)	0	68.565	20	7	28	2	396	45.8	9.41	88.25	7	3	0.837	0.951285	44.84	128.3	71.7	67.41	26.63	High	High	High	High	High	High	1		3	3	Present Both	1	GLYMA_13G047900	GLYMA_13G047900	sp|O80638|WTR14_ARATH	WAT1-related protein At2g39510 GN=WRKY3	ident:33/396 pos:51/396 query:396 hit:374 align:122 bit:34.7	Partial_match_both	WAT1-related protein At2g39510	na	WTR14_ARATH	O80638	na	OrderedLocusNames=At2g39510	na	Arabidopsis thaliana (Mouse-ear cress)	3702
High	Master Protein	GLYMA_09G177500	KOG4012 - Histone H1 (1 of 1)	0	23.048	13	3	8	3	497	53.4	10.39	23.36	3	0	1.084	0.963722	119.58	96	104	6.81	91.36	High	High	Not Found	High	High	High	1		2	3	Present Both	1	GLYMA_09G177500	GLYMA_09G177500	sp|Q43386|HMGYA_ARATH	HMG-Y-related protein A GN=HMGA	ident:34/497 pos:44/497 query:497 hit:204 align:67 bit:73.6	Partial_match_both	HMG-Y-related protein A (AtHMGA)	High mobility group A protein	HMGYA_ARATH	Q43386	P92954; Q8LGC1	HMGA	na	Arabidopsis thaliana (Mouse-ear cress)	3702
High	Master Protein	GLYMA_04G030800.2.p	KOG4042 - Dynactin subunit p27/WS-3, involved in transport of organelles along microtubules (1 of 1)	0	247.285	66	15	118	6	276	30	6.71	412.12	15	10	0.708	0.842928	27.37	125.4	74.6	31.23	25.99	High	High	High	High	High	High	1		3	3	Present Both	1	GLYMA_04G030800.2.p	GLYMA_04G030800.2.p	sp|Q9FWR5|GCA1_ARATH	Gamma carbonic anhydrase 1, mitochondrial GN=GAMMACA1	ident:225/276 pos:245/276 query:276 hit:275 align:269 bit:474.6	OK	Gamma carbonic anhydrase 1, mitochondrial (AtCA1; GAMMA CA1)	na	GCA1_ARATH	Q9FWR5	Q67XH5; Q682H9; Q8LF67; Q9LN36	GAMMACA1	na	Arabidopsis thaliana (Mouse-ear cress)	3702
High	Master Protein	GLYMA_05G051800	KOG4083 - Head-elevated expression protein (1 of 1)	0	38.587	9	2	13	2	168	19.1	8.15	38.72	2	0	0.754	0.897585	38.34	127.2	72.8	48.19	28.67	High	High	High	High	High	High	1		3	3	Present Both	1	GLYMA_05G051800	GLYMA_05G051800	sp|P93004|PIP27_ARATH	Aquaporin PIP2-7 GN=PIP2-7	ident:16/168 pos:24/168 query:168 hit:280 align:44 bit:26.9	Partial_match_both	Aquaporin PIP2-7	Plasma membrane intrinsic protein 2-7 (AtPIP2;7); Plasma membrane intrinsic protein 3; Salt stress-induced major intrinsic protein	PIP27_ARATH	P93004	O22332; O49616	PIP2-7	PIP3; SIMIP	Arabidopsis thaliana (Mouse-ear cress)	3702
High	Master Protein	GLYMA_08G290400	KOG4401 - Uncharacterized conserved protein (1 of 2)	0	28.616	38	3	12	3	186	20.5	5.68	40.97	3	0	0.574	0.543196	11.25	127.3	72.7	22.49	6.73	High	High	High	High	High	High	1		3	3	Present Both	1	GLYMA_08G290400	GLYMA_08G290400	sp|Q9LIP6|C71BV_ARATH	Cytochrome P450 71B34 GN=CYP71B34	ident:29/186 pos:46/186 query:186 hit:500 align:110 bit:28.9	Partial_match_hit	Cytochrome P450 71B34	na	C71BV_ARATH	Q9LIP6	C0Z3G7	CYP71B34	na	Arabidopsis thaliana (Mouse-ear cress)	3702
High	Master Protein	GLYMA_05G139900	KOG4467 - Uncharacterized conserved protein (1 of 4)	0	43.063	16	7	25	7	597	65.9	8.69	68.76	7	0	0.791	0.92137	57.15	123.2	76.8	59.12	35.98	High	High	High	High	High	High	1		3	3	Present Both	1	GLYMA_05G139900	GLYMA_05G139900	sp|Q94A41|AMY3_ARATH	Alpha-amylase 3, chloroplastic GN=AMY3	ident:20/597 pos:32/597 query:597 hit:887 align:67 bit:32.0	Partial_match_both	Alpha-amylase 3, chloroplastic (AtAMY3)	1,4-alpha-D-glucan glucanohydrolase	AMY3_ARATH	Q94A41	Q9CAR6	AMY3	na	Arabidopsis thaliana (Mouse-ear cress)	3702
High	Master Protein	GLYMA_08G340600	KOG4618 - Uncharacterized conserved protein (1 of 1)	0.001	3.196	15	1	4	1	71	8.2	9	8.94	1	0	1.11	0.946057	31.26	94.8	105.2	41.45	27.23	High	High	High	Peak Found	High	Peak Found	1		3	3	Present Both	1	GLYMA_08G340600	GLYMA_08G340600	sp|Q9CAU0|SCP6_ARATH	Serine carboxypeptidase-like 6 GN=SCPL6	ident:13/71 pos:16/71 query:71 hit:452 align:31 bit:26.2	Partial_match_both	Serine carboxypeptidase-like 6	na	SCP6_ARATH	Q9CAU0	na	SCPL6	na	Arabidopsis thaliana (Mouse-ear cress)	3702
High	Master Protein	GLYMA_10G028800	KOG4674 - Uncharacterized conserved coiled-coil protein (1 of 7)	0	6.465	1	2	5	2	2181	251.2	4.97	7.3	2	0	0.96	0.999223	98.25	104.4	95.6	101.54	101.86	High	High	Peak Found	High	High	Peak Found	1		3	3	Present Both	1	GLYMA_10G028800	GLYMA_10G028800	sp|F4HZB5|NET1D_ARATH	Protein NETWORKED 1D GN=NET1D	ident:682/2181 pos:952/2181 query:2181 hit:1733 align:1392 bit:1163.7	Poor_match	Protein NETWORKED 1D	na	NET1D_ARATH	F4HZB5	Q9SA62	NET1D	na	Arabidopsis thaliana (Mouse-ear cress)	3702
High	Master Protein	GLYMA_08G206000	KOG4766 - Uncharacterized conserved protein (1 of 4)	0	14.385	39	2	7	1	64	7	9.96	18.29	2	0	0.447	0.228603	11.02	144.5	55.5	90.78	29.48	High	High	Peak Found	Peak Found	High	Peak Found	1		3	3	Present Both	1	GLYMA_08G206000	GLYMA_08G206000	sp|Q9SZR3|SMXL4_ARATH	Protein SMAX1-LIKE 4 GN=SMXL4	ident:16/64 pos:26/64 query:64 hit:1017 align:47 bit:24.3	Partial_match_hit	Protein SMAX1-LIKE 4 (AtSMXL4)	Protein HEAT SHOCK PROTEIN-RELATED (AtHSPR)	SMXL4_ARATH	Q9SZR3	na	SMXL4	na	Arabidopsis thaliana (Mouse-ear cress)	3702
High	Master Protein	GLYMA_02G237000.2.p	PF00069//PF00560//PF08263 - Protein kinase domain (Pkinase) // Leucine Rich Repeat (LRR_1) // Leucine rich repeat N-terminal domain (LRRNT_2) (1 of 39)	0	14.644	3	1	6	1	654	71.6	8.85	23.32	1	0	1.031	0.985131	14.45	101.5	98.5	9.67	12.43	High	High	Not Found	High	High	Peak Found	1		2	3	Present Both	1	GLYMA_02G237000.2.p	GLYMA_02G237000.2.p	sp|Q9LVM0|Y5830_ARATH	Probable inactive receptor kinase At5g58300 GN=CBSDUF5	ident:442/654 pos:521/654 query:654 hit:654 align:644 bit:882.5	OK	Probable inactive receptor kinase At5g58300	na	Y5830_ARATH	Q9LVM0	na	OrderedLocusNames=At5g58300	na	Arabidopsis thaliana (Mouse-ear cress)	3702
Medium	Master Protein	GLYMA_04G220400	PF00069//PF00560//PF08263 - Protein kinase domain (Pkinase) // Leucine Rich Repeat (LRR_1) // Leucine rich repeat N-terminal domain (LRRNT_2) (1 of 39)	0.012	1.641	2	1	1	1	1039	113.6	7.11	0	1	0	0.228	0.0012925	1.42	162.9	37.1	0.2	42.95	High	Peak Found	Not Found	Peak Found	Peak Found	Peak Found	1		2	3	Present Both	1	GLYMA_04G220400	GLYMA_04G220400	sp|Q0WR59|Y5020_ARATH	Probable inactive receptor kinase At5g10020 GN=EMB2752	ident:663/1039 pos:801/1039 query:1039 hit:1048 align:1036 bit:1277.7	OK	Probable inactive receptor kinase At5g10020	na	Y5020_ARATH	Q0WR59	Q8VYQ5; Q9LEA2	OrderedLocusNames=At5g10020	na	Arabidopsis thaliana (Mouse-ear cress)	3702
High	Master Protein	GLYMA_02G244400	PF00069//PF08263 - Protein kinase domain (Pkinase) // Leucine rich repeat N-terminal domain (LRRNT_2) (1 of 37)	0	19.912	5	3	16	2	612	66.4	7.5	38.28	3	0	1.166	0.919239	40.34	64.8	135.2	19.51	37.08	High	High	High	High	High	High	1		3	3	Present Both	1	GLYMA_02G244400	GLYMA_02G244400	sp|Q9LP77|Y1848_ARATH	Probable inactive receptor kinase At1g48480 GN=RKL1	ident:329/612 pos:406/612 query:612 hit:655 align:613 bit:602.4	OK	Probable inactive receptor kinase At1g48480	na	Y1848_ARATH	Q9LP77	B9DHQ4; Q9ZT08	RKL1	na	Arabidopsis thaliana (Mouse-ear cress)	3702
High	Master Protein	GLYMA_14G206000.2.p	PF00069//PF08263//PF13855 - Protein kinase domain (Pkinase) // Leucine rich repeat N-terminal domain (LRRNT_2) // Leucine rich repeat (LRR_8) (1 of 85)	0	14.049	3	1	4	1	655	71.7	8.81	15.55	1	0	1.382	0.783983	5.59	84	116		5.33	High	High	Not Found	High	Not Found	High	1		2	2	Present Both	1	GLYMA_14G206000.2.p	GLYMA_14G206000.2.p	sp|Q9LVM0|Y5830_ARATH	Probable inactive receptor kinase At5g58300 GN=CBSDUF5	ident:436/655 pos:511/655 query:655 hit:654 align:641 bit:862.8	OK	Probable inactive receptor kinase At5g58300	na	Y5830_ARATH	Q9LVM0	na	OrderedLocusNames=At5g58300	na	Arabidopsis thaliana (Mouse-ear cress)	3702
High	Master Protein	GLYMA_09G206900	PF00076 - RNA recognition motif. (a.k.a. RRM, RBD, or RNP domain) (RRM_1) (1 of 477)	0	305.275	64	17	86	5	280	29.8	6.15	316.96	17	12	1.881	0.327002	74.09	66.7	133.3	19.77	11.79	High	High	High	High	High	High	1	Phospho [S258]	3	3	Present Both	1	GLYMA_09G206900	GLYMA_09G206900	sp|Q9LFD5|BPA1_ARATH	Binding partner of ACD11 1 GN=BPA1	ident:152/280 pos:194/280 query:280 hit:259 align:236 bit:302.8	OK	Binding partner of ACD11 1	na	BPA1_ARATH	Q9LFD5	A8MQX8; A8MSB5; C0Z220; Q93Z43	BPA1	na	Arabidopsis thaliana (Mouse-ear cress)	3702
High	Master Protein	GLYMA_01G015500	PF00076 - RNA recognition motif. (a.k.a. RRM, RBD, or RNP domain) (RRM_1) (1 of 477)	0	242.641	52	15	74	3	279	29.8	6.4	283.65	15	0	1.682	0.469901	53.07	60	140	8.25	27.1	High	High	High	High	High	High	1	Phospho [S257]	3	3	Present Both	1	GLYMA_01G015500	GLYMA_01G015500	sp|Q9LFD5|BPA1_ARATH	Binding partner of ACD11 1 GN=BPA1	ident:150/279 pos:194/279 query:279 hit:259 align:234 bit:298.1	OK	Binding partner of ACD11 1	na	BPA1_ARATH	Q9LFD5	A8MQX8; A8MSB5; C0Z220; Q93Z43	BPA1	na	Arabidopsis thaliana (Mouse-ear cress)	3702
High	Master Protein	GLYMA_11G117300	PF00076 - RNA recognition motif. (a.k.a. RRM, RBD, or RNP domain) (RRM_1) (1 of 477)	0	83.795	50	7	41	2	171	16.6	5.63	150.3	7	7	1.083	0.964226	44.54	101.6	98.4	39.67	14.2	High	High	High	High	High	High	1		3	3	Present Both	1	GLYMA_11G117300	GLYMA_11G117300	sp|Q03250|RBG7_ARATH	Glycine-rich RNA-binding protein 7 GN=RBG7	ident:70/171 pos:81/171 query:171 hit:176 align:85 bit:154.5	Partial_match_both	Glycine-rich RNA-binding protein 7 (AtGR-RBP7)	AtRBG7; Glycine-rich protein 7 (AtGRP7); Protein COLD, CIRCADIAN RHYTHM, AND RNA BINDING 2 (Protein CCR2)	RBG7_ARATH	Q03250	C0Z304; Q8LEV4; Q94B62	RBG7	CCR2; GR-RBP7; GRP7	Arabidopsis thaliana (Mouse-ear cress)	3702
High	Master Protein	GLYMA_04G012700	PF00076 - RNA recognition motif. (a.k.a. RRM, RBD, or RNP domain) (RRM_1) (1 of 477)	0	41.384	19	3	23	2	185	18	8.12	75.25	3	0	0.882	0.978903	30.99	87.3	112.7	47.01	24.54	High	High	Peak Found	High	High	High	1		3	3	Present Both	1	GLYMA_04G012700	GLYMA_04G012700	sp|Q03250|RBG7_ARATH	Glycine-rich RNA-binding protein 7 GN=RBG7	ident:67/185 pos:76/185 query:185 hit:176 align:85 bit:144.1	Partial_match_both	Glycine-rich RNA-binding protein 7 (AtGR-RBP7)	AtRBG7; Glycine-rich protein 7 (AtGRP7); Protein COLD, CIRCADIAN RHYTHM, AND RNA BINDING 2 (Protein CCR2)	RBG7_ARATH	Q03250	C0Z304; Q8LEV4; Q94B62	RBG7	CCR2; GR-RBP7; GRP7	Arabidopsis thaliana (Mouse-ear cress)	3702
High	Master Protein	GLYMA_12G043000.2.p	PF00076 - RNA recognition motif. (a.k.a. RRM, RBD, or RNP domain) (RRM_1) (1 of 477)	0	38.622	37	5	20	1	160	15.8	7.2	49.29	5	0	1.056	0.976873	1.42	97.3	102.7	54.75		High	High	Peak Found	Not Found	High	Not Found	1		3	1	Only Control	1	GLYMA_12G043000.2.p	GLYMA_12G043000.2.p	sp|Q03250|RBG7_ARATH	Glycine-rich RNA-binding protein 7 GN=RBG7	ident:68/160 pos:78/160 query:160 hit:176 align:85 bit:147.9	Partial_match_hit	Glycine-rich RNA-binding protein 7 (AtGR-RBP7)	AtRBG7; Glycine-rich protein 7 (AtGRP7); Protein COLD, CIRCADIAN RHYTHM, AND RNA BINDING 2 (Protein CCR2)	RBG7_ARATH	Q03250	C0Z304; Q8LEV4; Q94B62	RBG7	CCR2; GR-RBP7; GRP7	Arabidopsis thaliana (Mouse-ear cress)	3702
High	Master Protein	GLYMA_11G255000	PF00076 - RNA recognition motif. (a.k.a. RRM, RBD, or RNP domain) (RRM_1) (1 of 477)	0	17.8	20	2	6	2	145	15.1	5.19	17.2	2	0	0.471	0.276516	6.41	94	106	11.51	1.98	High	High	Peak Found	High	High	High	1		3	3	Present Both	1	GLYMA_11G255000	GLYMA_11G255000	sp|Q9SVM8|RBG2_ARATH	Glycine-rich RNA-binding protein 2, mitochondrial GN=RBG2	ident:64/145 pos:83/145 query:145 hit:158 align:100 bit:132.1	Poor_match	Glycine-rich RNA-binding protein 2, mitochondrial (AtGR-RBP2)	AtRBG2; Glycine-rich protein 2 (AtGRP2); Mitochondrial RNA-binding protein 1a (At-mRBP1a)	RBG2_ARATH	Q9SVM8	Q39105; Q41988	RBG2	GR-RBP2; GRP2; MRBP1A	Arabidopsis thaliana (Mouse-ear cress)	3702
High	Master Protein	GLYMA_04G015000	PF00083//PF07690 - Sugar (and other) transporter (Sugar_tr) // Major Facilitator Superfamily (MFS_1) (1 of 11)	0	7.836	2	1	4	1	738	78.7	5.72	2.21	1	0	1.352	0.809359	36.8	92.4	107.6	37.21	26.74	High	High	Peak Found	Peak Found	Peak Found	Peak Found	1		3	3	Present Both	1	GLYMA_04G015000	GLYMA_04G015000	sp|Q8LPQ8|MSSP2_ARATH	Monosaccharide-sensing protein 2 GN=MSSP2	ident:531/738 pos:631/738 query:738 hit:729 align:747 bit:989.6	OK	Monosaccharide-sensing protein 2	Sugar transporter MSSP2	MSSP2_ARATH	Q8LPQ8	O65497	MSSP2	na	Arabidopsis thaliana (Mouse-ear cress)	3702
High	Master Protein	GLYMA_04G247900	PF00085//PF13098//PF13848 - Thioredoxin (Thioredoxin) // Thioredoxin-like domain (Thioredoxin_2) // Thioredoxin-like domain (Thioredoxin_6) (1 of 2)	0	215.816	54	23	95	7	525	58.7	5.17	254.43	23	12	0.999	0.999223	100.92	148.1	51.9	57.02	106.6	High	High	Peak Found	High	High	Peak Found	1		3	3	Present Both	1	GLYMA_04G247900	GLYMA_04G247900	sp|Q9SRG3|PDI12_ARATH	Protein disulfide isomerase-like 1-2 GN=PDIL1-2	ident:338/525 pos:400/525 query:525 hit:508 align:483 bit:704.1	OK	Protein disulfide isomerase-like 1-2 (AtPDIL1-2)	Protein disulfide-isomerase 2 (PDI 2); Protein disulfide-isomerase 6 (AtPDI6)	PDI12_ARATH	Q9SRG3	Q0WV97	PDIL1-2	PDI6	Arabidopsis thaliana (Mouse-ear cress)	3702
High	Master Protein	GLYMA_06G114800	PF00085//PF13098//PF13848 - Thioredoxin (Thioredoxin) // Thioredoxin-like domain (Thioredoxin_2) // Thioredoxin-like domain (Thioredoxin_6) (1 of 2)	0	172.913	47	20	73	4	503	56.1	4.98	191.21	20	0	1.822	0.370097	50.38	20.5	179.5	23.76	65.84	High	High	Not Found	Peak Found	High	Peak Found	1		2	3	Present Both	1	GLYMA_06G114800	GLYMA_06G114800	sp|Q9SRG3|PDI12_ARATH	Protein disulfide isomerase-like 1-2 GN=PDIL1-2	ident:335/503 pos:395/503 query:503 hit:508 align:482 bit:694.9	OK	Protein disulfide isomerase-like 1-2 (AtPDIL1-2)	Protein disulfide-isomerase 2 (PDI 2); Protein disulfide-isomerase 6 (AtPDI6)	PDI12_ARATH	Q9SRG3	Q0WV97	PDIL1-2	PDI6	Arabidopsis thaliana (Mouse-ear cress)	3702
Medium	Master Protein	GLYMA_06G230400	PF00085//PF13181//PF13414 - Thioredoxin (Thioredoxin) // Tetratricopeptide repeat (TPR_8) // TPR repeat (TPR_11) (1 of 2)	0.011	1.76	1	1	2	1	678	73.5	8.54	0	1	0	0.888	0.983811	20	105.9	94.1	7.74	34.33	High	Not Found	Peak Found	Peak Found	High	Peak Found	1		2	3	Present Both	1	GLYMA_06G230400	GLYMA_06G230400	sp|Q9MAH1|TTL1_ARATH	TPR repeat-containing thioredoxin TTL1 GN=TTL1	ident:420/678 pos:504/678 query:678 hit:699 align:697 bit:775.4	OK	TPR repeat-containing thioredoxin TTL1	Tetratricopeptide repeat thioredoxin-like 1	TTL1_ARATH	Q9MAH1	na	TTL1	na	Arabidopsis thaliana (Mouse-ear cress)	3702
High	Master Protein	GLYMA_09G134500	PF00168 - C2 domain (C2) (1 of 196)	0	57.979	11	3	12	3	281	30.3	5.03	45.51	3	0	0.964	0.999223	37.34	59	141	92.06	38.32	High	High	High	High	High	High	1		3	3	Present Both	1	GLYMA_09G134500	GLYMA_09G134500	sp|O04023|SRC2_ARATH	Protein SRC2 homolog GN=SRC2	ident:65/281 pos:99/281 query:281 hit:324 align:236 bit:46.2	Poor_match	Protein SRC2 homolog (AtSRC2)	na	SRC2_ARATH	O04023	O81814	SRC2	na	Arabidopsis thaliana (Mouse-ear cress)	3702
High	Master Protein	GLYMA_09G045700	PF00168 - C2 domain (C2) (1 of 196)	0	39.49	21	6	24	6	290	30.8	6.64	55.33	6	0	0.999	0.999223	33.54	87.5	112.5	23.68	10.98	High	High	High	High	High	High	1		3	3	Present Both	1	GLYMA_09G045700	GLYMA_09G045700	sp|O04023|SRC2_ARATH	Protein SRC2 homolog GN=SRC2	ident:124/290 pos:162/290 query:290 hit:324 align:287 bit:166.0	Poor_match	Protein SRC2 homolog (AtSRC2)	na	SRC2_ARATH	O04023	O81814	SRC2	na	Arabidopsis thaliana (Mouse-ear cress)	3702
High	Master Protein	GLYMA_05G189200	PF00249 - Myb-like DNA-binding domain (Myb_DNA-binding) (1 of 577)	0	3.499	3	1	3	1	316	34.7	8.81	5.35	1	0	0.636	0.716636	7.85	121.7	78.3	27.11	8.61	High	High	Peak Found	Peak Found	Not Found	Peak Found	1		3	2	Present Both	1	GLYMA_05G189200	GLYMA_05G189200	sp|Q9ASQ2|MAMYB_ARATH	Transcription factor MAMYB GN=MAMYB	ident:162/316 pos:220/316 query:316 hit:309 align:317 bit:253.8	Poor_match	Transcription factor MAMYB	Membrane-anchored MYB	MAMYB_ARATH	Q9ASQ2	Q9FHJ4	MAMYB	na	Arabidopsis thaliana (Mouse-ear cress)	3702
High	Master Protein	GLYMA_04G009400	PF00257 - Dehydrin (Dehydrin) (1 of 7)	0	59.448	40	5	18	5	214	24.2	5.77	49.49	5	0	1.688	0.46572	104.4	41.3	158.7	89.04	47.23	High	High	High	High	High	High	1		3	3	Present Both	1	GLYMA_04G009400	GLYMA_04G009400	sp|P31168|COR47_ARATH	Dehydrin COR47 GN=COR47	ident:99/214 pos:134/214 query:214 hit:265 align:232 bit:92.0	Poor_match	Dehydrin COR47	Cold-induced COR47 protein	COR47_ARATH	P31168	Q39059	COR47	RD17	Arabidopsis thaliana (Mouse-ear cress)	3702
High	Master Protein	GLYMA_12G064300	PF00314 - Thaumatin family (Thaumatin) (1 of 61)	0	54.261	12	3	20	3	248	26.2	7.85	59.22	3	0	1.298	0.842928	123.9	42	158	82.59	67.98	High	High	High	High	High	High	1		3	3	Present Both	1	GLYMA_12G064300	GLYMA_12G064300	sp|P50699|TLPH_ARATH	Thaumatin-like protein GN=TIR	ident:101/248 pos:133/248 query:248 hit:243 align:225 bit:185.7	Poor_match	Thaumatin-like protein	na	TLPH_ARATH	P50699	Q9LM26	OrderedLocusNames=At1g18250	na	Arabidopsis thaliana (Mouse-ear cress)	3702
High	Master Protein	GLYMA_17G030200	PF00407 - Pathogenesis-related protein Bet v I family (Bet_v_1) (1 of 39)	0	236.253	80	17	104	15	158	16.7	5.05	356.1	17	2	0.797	0.927038	56.33	144.9	55.1	60.78	46.28	High	High	High	High	High	High	1		3	3	Present Both	1	GLYMA_17G030200	GLYMA_17G030200	sp|Q93VR4|ML423_ARATH	MLP-like protein 423 GN=MLP423	ident:47/158 pos:78/158 query:158 hit:155 align:156 bit:47.0	Poor_match	MLP-like protein 423	na	ML423_ARATH	Q93VR4	Q8L9L8; Q9LR93	MLP423	na	Arabidopsis thaliana (Mouse-ear cress)	3702
High	Master Protein	GLYMA_07G243600.2.p	PF00407 - Pathogenesis-related protein Bet v I family (Bet_v_1) (1 of 39)	0	163.215	75	13	68	7	158	16.8	4.88	215.27	13	4	0.611	0.642452	35.41	162.4	37.6	72.84	85.78	High	High	High	High	High	High	1		3	3	Present Both	1	GLYMA_07G243600.2.p	GLYMA_07G243600.2.p	sp|Q93VR4|ML423_ARATH	MLP-like protein 423 GN=MLP423	ident:46/158 pos:76/158 query:158 hit:155 align:155 bit:45.8	Poor_match	MLP-like protein 423	na	ML423_ARATH	Q93VR4	Q8L9L8; Q9LR93	MLP423	na	Arabidopsis thaliana (Mouse-ear cress)	3702
High	Master Protein	GLYMA_15G218900	PF00407 - Pathogenesis-related protein Bet v I family (Bet_v_1) (1 of 39)	0	125.756	68	8	48	4	152	17.6	6.74	150.81	8	0	1.811	0.370984	40.66	68.3	131.7	1.01	23.31	High	High	High	High	High	High	1		3	3	Present Both	1	GLYMA_15G218900	GLYMA_15G218900	sp|Q9SSK5|MLP43_ARATH	MLP-like protein 43 GN=MLP43	ident:58/152 pos:92/152 query:152 hit:158 align:151 bit:112.1	Poor_match	MLP-like protein 43	na	MLP43_ARATH	Q9SSK5	na	MLP43	na	Arabidopsis thaliana (Mouse-ear cress)	3702
High	Master Protein	GLYMA_08G230500	PF00407 - Pathogenesis-related protein Bet v I family (Bet_v_1) (1 of 39)	0	122.724	64	8	48	4	153	17.8	6.46	151.15	8	4	1.36	0.804553	42.54	80.4	119.6	32.15	16.95	High	High	High	High	High	High	1		3	3	Present Both	1	GLYMA_08G230500	GLYMA_08G230500	sp|Q9SSK5|MLP43_ARATH	MLP-like protein 43 GN=MLP43	ident:57/153 pos:90/153 query:153 hit:158 align:151 bit:112.5	Poor_match	MLP-like protein 43	na	MLP43_ARATH	Q9SSK5	na	MLP43	na	Arabidopsis thaliana (Mouse-ear cress)	3702
High	Master Protein	GLYMA_09G040600	PF00407 - Pathogenesis-related protein Bet v I family (Bet_v_1) (1 of 39)	0	100.054	79	11	36	11	158	16.5	4.83	113.68	11	0	0.531	0.434333	19.21	153.1	46.9	58.85	38.64	High	High	Peak Found	High	High	High	1		3	3	Present Both	1	GLYMA_09G040600	GLYMA_09G040600	sp|Q9FJ49|PYL12_ARATH	Abscisic acid receptor PYL12 GN=PYL12	ident:23/158 pos:42/158 query:158 hit:159 align:75 bit:40.4	Partial_match_both	Abscisic acid receptor PYL12	PYR1-like protein 12; Regulatory components of ABA receptor 6	PYL12_ARATH	Q9FJ49	na	PYL12	RCAR6	Arabidopsis thaliana (Mouse-ear cress)	3702
High	Master Protein	GLYMA_08G230100	PF00407 - Pathogenesis-related protein Bet v I family (Bet_v_1) (1 of 39)	0	36.372	43	5	20	4	152	17.6	5.68	59.66	5	0	1.298	0.842928	40.33	99.3	100.7	18.5	22.33	High	High	High	High	High	High	1		3	3	Present Both	1	GLYMA_08G230100	GLYMA_08G230100	sp|Q9SSK5|MLP43_ARATH	MLP-like protein 43 GN=MLP43	ident:63/152 pos:94/152 query:152 hit:158 align:151 bit:119.4	Poor_match	MLP-like protein 43	na	MLP43_ARATH	Q9SSK5	na	MLP43	na	Arabidopsis thaliana (Mouse-ear cress)	3702
High	Master Protein	GLYMA_17G030100	PF00407 - Pathogenesis-related protein Bet v I family (Bet_v_1) (1 of 39)	0	12.396	17	2	7	2	157	17.1	5.07	17.77	2	0	0.7	0.834549	31.5	135.9	64.1	48.75	53.72	High	High	Peak Found	Peak Found	High	High	1		3	3	Present Both	1	GLYMA_17G030100	GLYMA_17G030100	sp|Q93VR4|ML423_ARATH	MLP-like protein 423 GN=MLP423	ident:45/157 pos:65/157 query:157 hit:155 align:122 bit:60.1	Poor_match	MLP-like protein 423	na	ML423_ARATH	Q93VR4	Q8L9L8; Q9LR93	MLP423	na	Arabidopsis thaliana (Mouse-ear cress)	3702
High	Master Protein	GLYMA_06G097600	PF00515 - Tetratricopeptide repeat (TPR_1) (1 of 67)	0	137.602	46	11	51	9	222	24.2	9.09	197.06	11	3	0.803	0.934958	35.59	111.9	88.1	22.35	13.18	High	High	High	High	High	High	1	Phospho [S172]	3	3	Present Both	1	GLYMA_06G097600	GLYMA_06G097600	sp|B9DHG0|PYG7_ARATH	Tetratricopeptide repeat domain-containing protein PYG7, chloroplastic GN=PYG7	ident:20/222 pos:28/222 query:222 hit:301 align:56 bit:35.4	Partial_match_both	Tetratricopeptide repeat domain-containing protein PYG7, chloroplastic	Protein PALE YELLOW GREEN 7	PYG7_ARATH	B9DHG0	O80551; Q8LFF4; Q94EJ1	PYG7	na	Arabidopsis thaliana (Mouse-ear cress)	3702
High	Master Protein	GLYMA_04G095900	PF00515 - Tetratricopeptide repeat (TPR_1) (1 of 67)	0	44.397	30	4	19	2	221	24.1	8.7	60.58	4	0	0.345	0.0497461	4.51	109.7	90.3	37.64	24.78	High	Not Found	High	High	Not Found	High	1		2	2	Present Both	1	GLYMA_04G095900	GLYMA_04G095900	sp|B9DHG0|PYG7_ARATH	Tetratricopeptide repeat domain-containing protein PYG7, chloroplastic GN=PYG7	ident:21/221 pos:31/221 query:221 hit:301 align:59 bit:39.7	Partial_match_both	Tetratricopeptide repeat domain-containing protein PYG7, chloroplastic	Protein PALE YELLOW GREEN 7	PYG7_ARATH	B9DHG0	O80551; Q8LFF4; Q94EJ1	PYG7	na	Arabidopsis thaliana (Mouse-ear cress)	3702
High	Master Protein	GLYMA_16G015400	PF00560//PF07714//PF08263 - Leucine Rich Repeat (LRR_1) // Protein tyrosine kinase (Pkinase_Tyr) // Leucine rich repeat N-terminal domain (LRRNT_2) (1 of 14)	0.009	2.004	1	1	4	1	715	77.6	6.06	1.86	1	0	1.018	0.991206	100.02	138.5	61.5	67.92	81.46	High	High	Peak Found	Peak Found	High	Peak Found	1		3	3	Present Both	1	GLYMA_16G015400	GLYMA_16G015400	sp|Q9C8M9|SRF6_ARATH	Protein STRUBBELIG-RECEPTOR FAMILY 6 GN=SRF6	ident:470/715 pos:563/715 query:715 hit:719 align:715 bit:856.3	OK	Protein STRUBBELIG-RECEPTOR FAMILY 6	Leucine-rich repeat receptor kinase-like protein SRF6	SRF6_ARATH	Q9C8M9	Q9C8M8	SRF6	na	Arabidopsis thaliana (Mouse-ear cress)	3702
High	Master Protein	GLYMA_04G239000	PF00560//PF07714//PF08263//PF13855 - Leucine Rich Repeat (LRR_1) // Protein tyrosine kinase (Pkinase_Tyr) // Leucine rich repeat N-terminal domain (LRRNT_2) // Leucine rich repeat (LRR_8) (1 of 20)	0	12.787	4	2	4	2	633	68.9	6.8	9.53	2	0	1.025	0.98584	11.56	98.8	101.2	3.46	11.09	High	High	Not Found	Peak Found	High	Peak Found	1		2	3	Present Both	1	GLYMA_04G239000	GLYMA_04G239000	sp|Q9SUQ3|Y4374_ARATH	Probable inactive receptor kinase At4g23740 GN=WRKY3	ident:347/633 pos:445/633 query:633 hit:638 align:615 bit:678.7	OK	Probable inactive receptor kinase At4g23740	na	Y4374_ARATH	Q9SUQ3	na	OrderedLocusNames=At4g23740	na	Arabidopsis thaliana (Mouse-ear cress)	3702
High	Master Protein	GLYMA_11G134900	PF00582 - Universal stress protein family (Usp) (1 of 74)	0	140.807	36	7	54	4	164	17.7	6	199.77	7	4	1.226	0.891306	35.25	78.9	121.1	27.8	20.47	High	High	High	High	High	High	1		3	3	Present Both	1	GLYMA_11G134900	GLYMA_11G134900	sp|Q8VYN9|PHO32_ARATH	Universal stress protein PHOS32 GN=PHOS32	ident:47/164 pos:78/164 query:164 hit:242 align:150 bit:64.3	Poor_match	Universal stress protein PHOS32	Phosphorylated protein of 32 kDa (AtPHOS32)	PHO32_ARATH	Q8VYN9	Q9LSR2	PHOS32	na	Arabidopsis thaliana (Mouse-ear cress)	3702
High	Master Protein	GLYMA_12G058500	PF00582 - Universal stress protein family (Usp) (1 of 74)	0	140.687	39	6	51	3	164	17.9	5.91	177.57	6	0	1.317	0.834549	74.33	58.5	141.5	96.84	31.39	High	High	High	High	High	High	1		3	3	Present Both	1	GLYMA_12G058500	GLYMA_12G058500	sp|Q8VYN9|PHO32_ARATH	Universal stress protein PHOS32 GN=PHOS32	ident:46/164 pos:80/164 query:164 hit:242 align:153 bit:62.4	Poor_match	Universal stress protein PHOS32	Phosphorylated protein of 32 kDa (AtPHOS32)	PHO32_ARATH	Q8VYN9	Q9LSR2	PHOS32	na	Arabidopsis thaliana (Mouse-ear cress)	3702
High	Master Protein	GLYMA_04G107900	PF00582 - Universal stress protein family (Usp) (1 of 74)	0	10.331	16	3	15	2	167	18.7	5.96	22.67	3	0	1.368	0.797541	12.95	82.8	117.2	71.22	13.04	High	High	High	High	High	High	1		3	3	Present Both	1	GLYMA_04G107900	GLYMA_04G107900	sp|Q8LGG8|USPAL_ARATH	Universal stress protein A-like protein GN=URH2	ident:42/167 pos:79/167 query:167 hit:175 align:158 bit:62.0	Poor_match	Universal stress protein A-like protein	na	USPAL_ARATH	Q8LGG8	Q940U0; Q9SSA2	OrderedLocusNames=At3g01520	na	Arabidopsis thaliana (Mouse-ear cress)	3702
High	Master Protein	GLYMA_08G362500	PF01190 - Pollen proteins Ole e I like (Pollen_Ole_e_I) (1 of 43)	0	15.257	6	1	10	1	742	84.2	9.5	37.14	1	0	0.76	0.899245	71.26	170.7	29.3	76.85	105.07	High	High	Peak Found	High	High	High	1		3	3	Present Both	1	GLYMA_08G362500	GLYMA_08G362500	sp|Q94A28|ACO2M_ARATH	Aconitate hydratase 2, mitochondrial GN=ACO2	ident:13/742 pos:21/742 query:742 hit:995 align:34 bit:30.0	Partial_match_both	Aconitate hydratase 2, mitochondrial (Aconitase 2; mACO2)	Citrate hydro-lyase 2	ACO2M_ARATH	Q94A28	Q9SZ36	ACO2	na	Arabidopsis thaliana (Mouse-ear cress)	3702
High	Master Protein	GLYMA_08G211200	PF01918 - Alba (Alba) (1 of 15)	0	67.334	47	6	20	3	144	15.9	5.85	64.9	6	3	1.057	0.976873	75.17	88.9	111.1	25.27	16.59	High	Peak Found	Peak Found	High	High	Peak Found	1		3	3	Present Both	1	GLYMA_08G211200	GLYMA_08G211200	sp|O22969|Y2416_ARATH	Uncharacterized protein At2g34160 GN=WRKY3	ident:102/144 pos:111/144 query:144 hit:130 align:125 bit:203.8	OK	Uncharacterized protein At2g34160	na	Y2416_ARATH	O22969	na	OrderedLocusNames=At2g34160	na	Arabidopsis thaliana (Mouse-ear cress)	3702
High	Master Protein	GLYMA_13G364200	PF01918 - Alba (Alba) (1 of 15)	0	65.382	40	5	19	1	133	14.7	5.17	69.32	5	1	0.372	0.0828794	7.76	150.7	49.3	24.96	70.6	High	Not Found	Not Found	High	Not Found	Not Found	1	Acetyl [N-Term]	1	1	Missing Both	1	GLYMA_13G364200	GLYMA_13G364200	sp|O22969|Y2416_ARATH	Uncharacterized protein At2g34160 GN=WRKY3	ident:103/133 pos:113/133 query:133 hit:130 align:131 bit:199.1	OK	Uncharacterized protein At2g34160	na	Y2416_ARATH	O22969	na	OrderedLocusNames=At2g34160	na	Arabidopsis thaliana (Mouse-ear cress)	3702
High	Master Protein	GLYMA_15G009400	PF01918 - Alba (Alba) (1 of 15)	0	17.828	22	3	5	1	131	14.5	5.36	10.39	3	0	1.232	0.882627	16.82	89.6	110.4	15.95		High	High	Not Found	Not Found	High	Not Found	1		2	1	Only Control	1	GLYMA_15G009400	GLYMA_15G009400	sp|O22969|Y2416_ARATH	Uncharacterized protein At2g34160 GN=WRKY3	ident:98/131 pos:108/131 query:131 hit:130 align:120 bit:194.5	OK	Uncharacterized protein At2g34160	na	Y2416_ARATH	O22969	na	OrderedLocusNames=At2g34160	na	Arabidopsis thaliana (Mouse-ear cress)	3702
High	Master Protein	GLYMA_U043500	PF02178 - AT hook motif (AT_hook) (1 of 2)	0	20.221	12	1	6	1	240	25.7	10.17	19.32	1	0	2.47	0.0831418	35.68	57.6	142.4	34.09	4.45	High	Peak Found	High	High	Not Found	High	1		3	2	Present Both	1	GLYMA_U043500	GLYMA_U043500	sp|P26569|H12_ARATH	Histone H1.2 GN=GPT2	ident:34/240 pos:44/240 query:240 hit:273 align:71 bit:60.5	Partial_match_both	Histone H1.2	na	H12_ARATH	P26569	na	OrderedLocusNames=At2g30620	na	Arabidopsis thaliana (Mouse-ear cress)	3702
High	Master Protein	GLYMA_11G187900	PF02238 - Cytochrome c oxidase subunit VIIa (COX7a) (1 of 3)	0	205.948	78	7	126	7	67	7.6	9.92	481.29	7	0	1.045	0.976873	95.88	104	96	46.68	28.53	High	High	High	High	High	High	1		3	3	Present Both	1	GLYMA_11G187900	GLYMA_11G187900	sp|Q9C994|DTX14_ARATH	Protein DETOXIFICATION 14 GN=DTX14	ident:13/67 pos:23/67 query:67 hit:485 align:45 bit:26.6	Partial_match_hit	Protein DETOXIFICATION 14 (AtDTX14)	Multidrug and toxic compound extrusion protein 14 (MATE protein 14)	DTX14_ARATH	Q9C994	na	DTX14	na	Arabidopsis thaliana (Mouse-ear cress)	3702
High	Master Protein	GLYMA_03G109900	PF02298 - Plastocyanin-like domain (Cu_bind_like) (1 of 91)	0	75.841	15	5	54	5	187	19.2	5.36	151.37	5	0	0.906	0.99265	63.5	133.4	66.6	34.98	64.46	High	High	High	High	High	High	1		3	3	Present Both	1	GLYMA_03G109900	GLYMA_03G109900	sp|O82081|UCC1_ARATH	Uclacyanin 1 GN=UCC1	ident:58/187 pos:80/187 query:187 hit:261 align:125 bit:122.5	Partial_match_hit	Uclacyanin 1	na	UCC1_ARATH	O82081	Q0WPC5	UCC1	na	Arabidopsis thaliana (Mouse-ear cress)	3702
High	Master Protein	GLYMA_20G217100	PF02298 - Plastocyanin-like domain (Cu_bind_like) (1 of 91)	0	12.924	10	1	5	1	195	21.5	7.46	12.63	1	0	1.137	0.935704	30.83	101.9	98.1	25.55	14.6	High	Peak Found	Peak Found	High	High	High	1		3	3	Present Both	1	GLYMA_20G217100	GLYMA_20G217100	sp|Q9SK27|ENL1_ARATH	Early nodulin-like protein 1 GN=GSH1	ident:58/195 pos:92/195 query:195 hit:182 align:186 bit:85.1	Poor_match	Early nodulin-like protein 1	Phytocyanin-like protein	ENL1_ARATH	Q9SK27	Q680Y2	OrderedLocusNames=At2g25060	na	Arabidopsis thaliana (Mouse-ear cress)	3702
High	Master Protein	GLYMA_06G270000	PF02298 - Plastocyanin-like domain (Cu_bind_like) (1 of 91)	0	12.244	9	1	6	1	217	23.2	7.87	22.6	1	0	0.809	0.937912	39.85	105.1	94.9	72.76	22.78	High	Peak Found	High	High	High	High	1		3	3	Present Both	1	GLYMA_06G270000	GLYMA_06G270000	sp|Q9SK27|ENL1_ARATH	Early nodulin-like protein 1 GN=GSH1	ident:62/217 pos:93/217 query:217 hit:182 align:146 bit:124.8	Poor_match	Early nodulin-like protein 1	Phytocyanin-like protein	ENL1_ARATH	Q9SK27	Q680Y2	OrderedLocusNames=At2g25060	na	Arabidopsis thaliana (Mouse-ear cress)	3702
High	Master Protein	GLYMA_12G213200	PF02298 - Plastocyanin-like domain (Cu_bind_like) (1 of 91)	0	9.604	8	1	4	1	244	25.7	6.65	12.83	1	0	0.968	0.999223	16.91	101.6	98.4	5.8	24.77	High	High	Not Found	Peak Found	High	Peak Found	1		2	3	Present Both	1	GLYMA_12G213200	GLYMA_12G213200	sp|Q9SK27|ENL1_ARATH	Early nodulin-like protein 1 GN=GSH1	ident:61/244 pos:93/244 query:244 hit:182 align:156 bit:111.3	Poor_match	Early nodulin-like protein 1	Phytocyanin-like protein	ENL1_ARATH	Q9SK27	Q680Y2	OrderedLocusNames=At2g25060	na	Arabidopsis thaliana (Mouse-ear cress)	3702
High	Master Protein	GLYMA_07G115000	PF02298 - Plastocyanin-like domain (Cu_bind_like) (1 of 91)	0.001	3.236	4	1	6	1	185	19.2	6.76	10.01	1	0	0.588	0.579664	27.08	149.5	50.5	44.47	79.41	High	High	Peak Found	High	High	High	1		3	3	Present Both	1	GLYMA_07G115000	GLYMA_07G115000	sp|Q96316|BCB3_ARATH	Uclacyanin-3 GN=UCC3	ident:52/185 pos:70/185 query:185 hit:222 align:104 bit:119.4	Partial_match_hit	Uclacyanin-3 (Uclacyanin-III)	Blue copper-binding protein III (BCB III); Phytocyanin 3	BCB3_ARATH	Q96316	na	UCC3	na	Arabidopsis thaliana (Mouse-ear cress)	3702
High	Master Protein	GLYMA_16G166600	PF02496 - ABA/WDS induced protein (ABA_WDS) (1 of 3)	0	78.445	59	4	14	4	111	12.6	6.86	64.53	4	0	0.966	0.999223	25.79	41.5	158.5	99.76	56.75	High	High	High	High	High	High	1		3	3	Present Both	1	GLYMA_16G166600	GLYMA_16G166600	sp|Q15KI9|PHYLO_ARATH	Protein PHYLLO, chloroplastic GN=PHYLLO	ident:12/111 pos:16/111 query:111 hit:1715 align:30 bit:28.1	Partial_match_both	2-succinyl-6-hydroxy-2,4-cyclohexadiene-1-carboxylate synthase	MENF; MEND; MENC; MENH	PHYLO_ARATH	Q15KI9	Q0WV21; Q15KJ0; Q9CAB1; Q9CAB2	PHYLLO	na	Arabidopsis thaliana (Mouse-ear cress)	3702
Medium	Master Protein	GLYMA_15G121700	PF03000 - NPH3 family (NPH3) (1 of 77)	0.03	1.161	2	1	2	1	603	68.1	9.14	0	1	0	0.592	0.591485	1.59	125.6	74.4	2.12	47.23	High	High	Peak Found	Peak Found	Peak Found	Peak Found	1		3	3	Present Both	1	GLYMA_15G121700	GLYMA_15G121700	sp|Q9FIK1|Y5780_ARATH	BTB/POZ domain-containing protein At5g47800 GN=YAO	ident:308/603 pos:394/603 query:603 hit:559 align:505 bit:659.1	Poor_match	BTB/POZ domain-containing protein At5g47800	na	Y5780_ARATH	Q9FIK1	na	OrderedLocusNames=At5g47800	na	Arabidopsis thaliana (Mouse-ear cress)	3702
High	Master Protein	GLYMA_13G327800	PF03094//PF03911 - Mlo family (Mlo) // Sec61beta family (Sec61_beta) (1 of 2)	0	52.843	10	4	32	3	539	61.3	10.45	101.49	4	1	0.873	0.976873	33.11	123.7	76.3	62.93	31.93	High	High	High	High	High	High	1		3	3	Present Both	1	GLYMA_13G327800	GLYMA_13G327800	sp|Q94KB7|MLO6_ARATH	MLO-like protein 6 GN=MLO6	ident:281/539 pos:337/539 query:539 hit:583 align:447 bit:583.2	OK	MLO-like protein 6 (AtMlo6)	na	MLO6_ARATH	Q94KB7	Q9SY94	MLO6	na	Arabidopsis thaliana (Mouse-ear cress)	3702
High	Master Protein	GLYMA_U019600	PF03094//PF03911 - Mlo family (Mlo) // Sec61beta family (Sec61_beta) (1 of 2)	0	19.635	5	2	14	1	695	78.1	9.6	43.13	2	0	0.65	0.746272	29.95	142.2	57.8	72.01	43.4	High	High	Peak Found	High	High	High	1		3	3	Present Both	1	GLYMA_U019600	GLYMA_U019600	sp|Q94KB7|MLO6_ARATH	MLO-like protein 6 GN=MLO6	ident:348/695 pos:423/695 query:695 hit:583 align:558 bit:703.4	Poor_match	MLO-like protein 6 (AtMlo6)	na	MLO6_ARATH	Q94KB7	Q9SY94	MLO6	na	Arabidopsis thaliana (Mouse-ear cress)	3702
High	Master Protein	GLYMA_03G228200	PF03489//PF05184//PF14543 - Saposin-like type B, region 2 (SapB_2) // Saposin-like type B, region 1 (SapB_1) // Xylanase inhibitor N-terminal (TAXi_N) (1 of 1)	0	33.309	8	3	11	2	508	55.3	6.73	38.64	3	0	1.384	0.781794	80.22	94.6	105.4	66.66	5.23	High	High	High	High	Peak Found	High	1		3	3	Present Both	1	GLYMA_03G228200	GLYMA_03G228200	sp|O65390|APA1_ARATH	Aspartic proteinase A1 GN=APA1	ident:298/508 pos:363/508 query:508 hit:506 align:505 bit:609.0	OK	Aspartic proteinase A1	na	APA1_ARATH	O65390	Q38934	APA1	PRA1	Arabidopsis thaliana (Mouse-ear cress)	3702
High	Master Protein	GLYMA_20G129500	PF03600//PF04083 - Citrate transporter (CitMHS) // Partial alpha/beta-hydrolase lipase region (Abhydro_lipase) (1 of 1)	0	5.011	1	1	4	1	647	70	6.1	4.71	1	0	0.521	0.405303	33.4	60	140	103.05	63.78	High	High	Peak Found	High	Peak Found	High	1		3	3	Present Both	1	GLYMA_20G129500	GLYMA_20G129500	sp|Q9LT68|NHD1_ARATH	Sodium/proton antiporter 1 GN=NHD1	ident:346/647 pos:392/647 query:647 hit:576 align:438 bit:671.0	OK	Sodium/proton antiporter 1 (AtNHD1; Na(+)/H(+) antiporter 1)	na	NHD1_ARATH	Q9LT68	na	NHD1	na	Arabidopsis thaliana (Mouse-ear cress)	3702
High	Master Protein	GLYMA_07G073100	PF03766 - Remorin, N-terminal region (Remorin_N) (1 of 8)	0	299.772	73	23	217	12	198	21.6	8.43	665.79	23	11	0.843	0.959433	45.7	117.8	82.2	47.76	17.59	High	High	High	High	High	High	1		3	3	Present Both	1	GLYMA_07G073100	GLYMA_07G073100	sp|Q9M2D8|Y3126_ARATH	Uncharacterized protein At3g61260 GN=CBSDUF4	ident:104/198 pos:128/198 query:198 hit:212 align:159 bit:198.7	OK	Uncharacterized protein At3g61260	na	Y3126_ARATH	Q9M2D8	na	OrderedLocusNames=At3g61260	na	Arabidopsis thaliana (Mouse-ear cress)	3702
High	Master Protein	GLYMA_03G013400	PF03766 - Remorin, N-terminal region (Remorin_N) (1 of 8)	0	205.014	68	15	139	6	200	22	6.83	394.93	15	0	0.993	0.999223	51.68	120.9	79.1	44.09	27.74	High	High	High	High	High	High	1		3	3	Present Both	1	GLYMA_03G013400	GLYMA_03G013400	sp|Q9M2D8|Y3126_ARATH	Uncharacterized protein At3g61260 GN=CBSDUF4	ident:102/200 pos:124/200 query:200 hit:212 align:161 bit:193.7	Poor_match	Uncharacterized protein At3g61260	na	Y3126_ARATH	Q9M2D8	na	OrderedLocusNames=At3g61260	na	Arabidopsis thaliana (Mouse-ear cress)	3702
High	Master Protein	GLYMA_10G236300	PF03766 - Remorin, N-terminal region (Remorin_N) (1 of 8)	0	89.945	43	9	34	6	194	21.5	5.83	101.52	9	1	0.853	0.967747	51.67	149.9	50.1	66.03	77.23	High	High	Peak Found	High	High	High	1		3	3	Present Both	1	GLYMA_10G236300	GLYMA_10G236300	sp|Q9FFA5|RMR14_ARATH	Remorin 1.4 GN=REM1.4	ident:128/194 pos:148/194 query:194 hit:202 align:208 bit:204.9	OK	Remorin 1.4 (AtREM1.4)	Remorin group 1 member 4	RMR14_ARATH	Q9FFA5	F4KEA0; Q8LC13	REM1.4	na	Arabidopsis thaliana (Mouse-ear cress)	3702
High	Master Protein	GLYMA_16G189500	PF03766 - Remorin, N-terminal region (Remorin_N) (1 of 8)	0	89.323	41	8	37	2	205	22.3	5.82	93.04	8	0	1.025	0.98584	68.52	116.2	83.8	51.87	53.43	High	High	Peak Found	High	High	High	1		3	3	Present Both	1	GLYMA_16G189500	GLYMA_16G189500	sp|Q9M2D8|Y3126_ARATH	Uncharacterized protein At3g61260 GN=CBSDUF4	ident:115/205 pos:134/205 query:205 hit:212 align:168 bit:205.3	OK	Uncharacterized protein At3g61260	na	Y3126_ARATH	Q9M2D8	na	OrderedLocusNames=At3g61260	na	Arabidopsis thaliana (Mouse-ear cress)	3702
High	Master Protein	GLYMA_18G230500	PF03766 - Remorin, N-terminal region (Remorin_N) (1 of 8)	0	83.092	48	11	35	9	183	20.1	8.7	114.13	11	0	0.883	0.979435	48.06	125.2	74.8	43.32	38.89	High	High	High	High	High	High	1		3	3	Present Both	1	GLYMA_18G230500	GLYMA_18G230500	sp|Q9M2D8|Y3126_ARATH	Uncharacterized protein At3g61260 GN=CBSDUF4	ident:96/183 pos:123/183 query:183 hit:212 align:149 bit:195.7	OK	Uncharacterized protein At3g61260	na	Y3126_ARATH	Q9M2D8	na	OrderedLocusNames=At3g61260	na	Arabidopsis thaliana (Mouse-ear cress)	3702
High	Master Protein	GLYMA_09G139200	PF03766 - Remorin, N-terminal region (Remorin_N) (1 of 8)	0	78.141	41	8	34	2	206	22.5	5.82	78.97	8	4	0.778	0.919239	58.24	126.6	73.4	72.93	43.06	High	High	Not Found	Peak Found	High	Peak Found	1		2	3	Present Both	1	GLYMA_09G139200	GLYMA_09G139200	sp|Q9M2D8|Y3126_ARATH	Uncharacterized protein At3g61260 GN=CBSDUF4	ident:113/206 pos:132/206 query:206 hit:212 align:168 bit:203.0	OK	Uncharacterized protein At3g61260	na	Y3126_ARATH	Q9M2D8	na	OrderedLocusNames=At3g61260	na	Arabidopsis thaliana (Mouse-ear cress)	3702
Medium	Master Protein	GLYMA_13G120400.3.p	PF04576 - Zein-binding (Zein-binding) (1 of 28)	0.023	1.299	1	1	1	1	855	94.7	4.94	1.93	1	0	0.754	0.897585	66.87	164.8	35.2	76.2	90.34	High	Peak Found	Peak Found	Peak Found	Peak Found	Peak Found	1		3	3	Present Both	1	GLYMA_13G120400.3.p	GLYMA_13G120400.3.p	sp|F4INW9|MYOB4_ARATH	Probable myosin-binding protein 4 GN=MYOB4	ident:120/855 pos:153/855 query:855 hit:760 align:261 bit:209.1	Partial_match_both	Probable myosin-binding protein 4	na	MYOB4_ARATH	F4INW9	O49334	MYOB4	na	Arabidopsis thaliana (Mouse-ear cress)	3702
High	Master Protein	GLYMA_13G217700	PF04862 - Protein of unknown function (DUF642) (DUF642) (1 of 13)	0	27.396	10	3	12	3	393	43.1	5.11	32.24	3	0	0.841	0.957893	54.43	78.9	121.1	71.49	122.65	High	High	Peak Found	High	High	High	1		3	3	Present Both	1	GLYMA_13G217700	GLYMA_13G217700	sp|Q9LSU6|DCAM3_ARATH	S-adenosylmethionine decarboxylase proenzyme 3 GN=SAMDC3	ident:26/393 pos:40/393 query:393 hit:349 align:88 bit:32.0	Partial_match_both	S-adenosylmethionine decarboxylase 1 beta chain (AdoMetDC3)	na	DCAM3_ARATH	Q9LSU6	na	SAMDC3	na	Arabidopsis thaliana (Mouse-ear cress)	3702
High	Master Protein	GLYMA_11G181400	PF05450 - Nicastrin (Nicastrin) (1 of 3)	0	25.702	7	3	14	3	562	62.6	6.58	36.38	3	0	0.69	0.827363	25.5	134	66	54.35	66.02	High	High	Peak Found	High	High	High	1		3	3	Present Both	1	GLYMA_11G181400	GLYMA_11G181400	sp|Q8GUM5|NICA_ARATH	Nicastrin GN=NHX4	ident:39/562 pos:65/562 query:562 hit:676 align:163 bit:34.7	Partial_match_both	Nicastrin	na	NICA_ARATH	Q8GUM5	Q9LXJ9; Q9LXK0	OrderedLocusNames=At3g52640/At3g52650	na	Arabidopsis thaliana (Mouse-ear cress)	3702
High	Master Protein	GLYMA_15G154700	PF05558 - DREPP plasma membrane polypeptide (DREPP) (1 of 2)	0	240.106	56	18	83	4	218	24.3	5.05	279.74	18	14	0.863	0.976873	43.78	122.7	77.3	35.55	42.39	High	High	Peak Found	High	High	High	1		3	3	Present Both	1	GLYMA_15G154700	GLYMA_15G154700	sp|Q96262|PCAP1_ARATH	Plasma membrane-associated cation-binding protein 1 GN=PCAP1	ident:115/218 pos:131/218 query:218 hit:225 align:181 bit:171.8	OK	Plasma membrane-associated cation-binding protein 1 (AtPCAP1)	Microtubule-destabilizing protein 25	PCAP1_ARATH	Q96262	F4JUT4; Q56YV4; Q8H7H8; Q8LDH5	PCAP1	MDP25	Arabidopsis thaliana (Mouse-ear cress)	3702
High	Master Protein	GLYMA_09G047200	PF05558 - DREPP plasma membrane polypeptide (DREPP) (1 of 2)	0	224.697	66	17	78	3	207	23.1	4.93	251.45	17	0	100	9.48889e-17			200		12.68	High	High	Not Found	High	High	Not Found	1		2	2	Present Both	1	GLYMA_09G047200	GLYMA_09G047200	sp|Q96262|PCAP1_ARATH	Plasma membrane-associated cation-binding protein 1 GN=PCAP1	ident:114/207 pos:130/207 query:207 hit:225 align:179 bit:172.6	OK	Plasma membrane-associated cation-binding protein 1 (AtPCAP1)	Microtubule-destabilizing protein 25	PCAP1_ARATH	Q96262	F4JUT4; Q56YV4; Q8H7H8; Q8LDH5	PCAP1	MDP25	Arabidopsis thaliana (Mouse-ear cress)	3702
High	Master Protein	GLYMA_13G237000	PF05564 - Dormancy/auxin associated protein (Auxin_repressed) (1 of 8)	0	32.774	44	3	13	2	117	12.9	9.76	44.4	3	1	0.805	0.934958	32.62	95.2	104.8	22.63	35.46	High	High	Peak Found	High	Peak Found	High	1		3	3	Present Both	1	GLYMA_13G237000	GLYMA_13G237000	sp|Q9FKV8|DRMH2_ARATH	Dormancy-associated protein homolog 2 GN=DRMH2	ident:69/117 pos:84/117 query:117 hit:114 align:123 bit:127.9	OK	Dormancy-associated protein homolog 2	DRM1 homolog 2; Dormancy/auxin associated family protein	DRMH2_ARATH	Q9FKV8	Q8L9R9	DRMH2	na	Arabidopsis thaliana (Mouse-ear cress)	3702
High	Master Protein	GLYMA_08G330400	PF05627 - Cleavage site for pathogenic type III effector avirulence factor Avr (AvrRpt-cleavage) (1 of 25)	0	66.978	51	3	20	1	79	8.6	7.97	80.92	3	2	1.825	0.368027	70.73	68.3	131.7	37.22	32.03	High	High	High	High	High	High	1		3	3	Present Both	1	GLYMA_08G330400	GLYMA_08G330400	sp|O22633|NOI4_ARATH	Protein NOI4 GN=NOI4	ident:56/79 pos:62/79 query:79 hit:79 align:79 bit:114.8	OK	Protein NOI4	Protein DiDi 18T-1d	NOI4_ARATH	O22633	F4K693; F4K694; Q9M3R9	NOI4	na	Arabidopsis thaliana (Mouse-ear cress)	3702
High	Master Protein	GLYMA_18G075900	PF05627 - Cleavage site for pathogenic type III effector avirulence factor Avr (AvrRpt-cleavage) (1 of 25)	0	64.029	51	3	20	1	79	8.6	7.97	83.69	3	0	0.924	0.999223	22.43	101.9	98.1	16.9	25.11	High	High	High	High	High	High	1		3	3	Present Both	1	GLYMA_18G075900	GLYMA_18G075900	sp|O22633|NOI4_ARATH	Protein NOI4 GN=NOI4	ident:55/79 pos:61/79 query:79 hit:79 align:79 bit:113.2	OK	Protein NOI4	Protein DiDi 18T-1d	NOI4_ARATH	O22633	F4K693; F4K694; Q9M3R9	NOI4	na	Arabidopsis thaliana (Mouse-ear cress)	3702
High	Master Protein	GLYMA_09G222500	PF05680 - ATP synthase E chain (ATP-synt_E) (1 of 2)	0	13.302	26	1	8	1	53	5.7	10.17	26.17	1	0	0.453	0.242728	23.3	87.6	112.4	78.9	58.68	High	High	High	High	High	High	1		3	3	Present Both	1	GLYMA_09G222500	GLYMA_09G222500	sp|Q58P71|CHX8_ARATH	Cation/H(+) antiporter 8 GN=CHX8	ident:12/53 pos:18/53 query:53 hit:816 align:28 bit:25.0	Partial_match_hit	Cation/H(+) antiporter 8	Protein CATION/H+ EXCHANGER 8 (AtCHX8)	CHX8_ARATH	Q58P71	F4IHR1; Q9ZUW0	CHX8	CHX08	Arabidopsis thaliana (Mouse-ear cress)	3702
High	Master Protein	GLYMA_12G036000	PF05680 - ATP synthase E chain (ATP-synt_E) (1 of 2)	0	12.994	26	1	8	1	53	5.6	10.17	24.62	1	0	0.792	0.92254	72.91	73.5	126.5	66.92	60.36	High	High	High	High	High	High	1		3	3	Present Both	1	GLYMA_12G036000	GLYMA_12G036000	sp|Q58P71|CHX8_ARATH	Cation/H(+) antiporter 8 GN=CHX8	ident:12/53 pos:18/53 query:53 hit:816 align:28 bit:25.0	Partial_match_hit	Cation/H(+) antiporter 8	Protein CATION/H+ EXCHANGER 8 (AtCHX8)	CHX8_ARATH	Q58P71	F4IHR1; Q9ZUW0	CHX8	CHX08	Arabidopsis thaliana (Mouse-ear cress)	3702
High	Master Protein	GLYMA_15G008800	PF06232 - Embryo-specific protein 3, (ATS3) (ATS3) (1 of 9)	0	23.372	18	2	8	2	170	19.3	4.93	27.58	2	0	1.542	0.601459	55.56	105.1	94.9	17.44	37.49	High	High	High	High	High	High	1		3	3	Present Both	1	GLYMA_15G008800	GLYMA_15G008800	sp|Q6NPM5|ATS3B_ARATH	Embryo-specific protein ATS3B GN=ATS3B	ident:87/170 pos:109/170 query:170 hit:190 align:169 bit:174.9	Poor_match	Embryo-specific protein ATS3B	Protein ARABIDOPSIS THALIANA SEED 3B	ATS3B_ARATH	Q6NPM5	Q680D1; Q9LVB6	ATS3B	na	Arabidopsis thaliana (Mouse-ear cress)	3702
High	Master Protein	GLYMA_06G186900	PF06522 - NADH-ubiquinone reductase complex 1 MLRQ subunit (B12D) (1 of 6)	0	106.651	49	7	26	2	84	9.5	8.02	115.68	7	5	1.213	0.897585	50	62.2	137.8	65.08	52.21	High	Peak Found	High	High	Peak Found	High	1		3	3	Present Both	1	GLYMA_06G186900	GLYMA_06G186900	sp|Q9LZP3|PP293_ARATH	Pentatricopeptide repeat-containing protein At3g62470, mitochondrial GN=PCMP-H80	ident:14/84 pos:21/84 query:84 hit:599 align:43 bit:28.1	Partial_match_hit	Pentatricopeptide repeat-containing protein At3g62470, mitochondrial	na	PP293_ARATH	Q9LZP3	na	OrderedLocusNames=At3g62470	na	Arabidopsis thaliana (Mouse-ear cress)	3702
High	Master Protein	GLYMA_04G178100	PF06522 - NADH-ubiquinone reductase complex 1 MLRQ subunit (B12D) (1 of 6)	0	89.354	46	6	23	1	89	10.1	9.35	103.87	6	0	0.848	0.964419	70.55	77.2	122.8	50.52	47.58	High	High	High	High	Peak Found	High	1		3	3	Present Both	1	GLYMA_04G178100	GLYMA_04G178100	sp|Q9MA15|AB1K3_ARATH	Protein ACTIVITY OF BC1 COMPLEX KINASE 3, chloroplastic GN=ABC1K3	ident:17/89 pos:24/89 query:89 hit:711 align:53 bit:25.4	Partial_match_hit	Protein ACTIVITY OF BC1 COMPLEX KINASE 3, chloroplastic (ABC1-LIKE KINASE 3)	Protein REPRESSOR OF BDR1	AB1K3_ARATH	Q9MA15	Q94BV0	ABC1K3	na	Arabidopsis thaliana (Mouse-ear cress)	3702
High	Master Protein	GLYMA_09G271500	PF06697 - Protein of unknown function (DUF1191) (DUF1191) (1 of 14)	0	46.914	13	4	15	3	327	35.4	7.84	59.71	4	0	0.933	0.999223	24.81	87.4	112.6	35.26	70.43	High	High	Peak Found	High	High	High	1		3	3	Present Both	1	GLYMA_09G271500	GLYMA_09G271500	sp|Q9FLW0|Y5241_ARATH	Probable receptor-like protein kinase At5g24010 GN=CBSCBSPB4	ident:16/327 pos:20/327 query:327 hit:824 align:31 bit:36.2	Partial_match_both	Probable receptor-like protein kinase At5g24010	na	Y5241_ARATH	Q9FLW0	Q8RXW4	OrderedLocusNames=At5g24010	na	Arabidopsis thaliana (Mouse-ear cress)	3702
High	Master Protein	GLYMA_18G217800	PF06697 - Protein of unknown function (DUF1191) (DUF1191) (1 of 14)	0	14.134	11	3	9	2	324	35.1	8.98	28.28	3	0	1.119	0.943109	33.19	82.9	117.1	22.19	32.41	High	High	Peak Found	High	High	High	1		3	3	Present Both	1	GLYMA_18G217800	GLYMA_18G217800	sp|Q9FLW0|Y5241_ARATH	Probable receptor-like protein kinase At5g24010 GN=CBSCBSPB4	ident:17/324 pos:21/324 query:324 hit:824 align:37 bit:37.4	Partial_match_both	Probable receptor-like protein kinase At5g24010	na	Y5241_ARATH	Q9FLW0	Q8RXW4	OrderedLocusNames=At5g24010	na	Arabidopsis thaliana (Mouse-ear cress)	3702
High	Master Protein	GLYMA_16G221400	PF06697 - Protein of unknown function (DUF1191) (DUF1191) (1 of 14)	0	10.256	3	1	6	1	376	40.6	9.57	22.06	1	0	0.705	0.839724	40.38	94.3	105.7	48.92	27.5	High	High	High	High	High	High	1		3	3	Present Both	1	GLYMA_16G221400	GLYMA_16G221400	sp|P43298|TMK1_ARATH	Receptor protein kinase TMK1 GN=TMK1	ident:19/376 pos:25/376 query:376 hit:942 align:37 bit:38.1	Partial_match_both	Receptor protein kinase TMK1	BARK1-like kinase 1; Transmembrane kinase 1	TMK1_ARATH	P43298	C0LGH9; Q84R13	TMK1	na	Arabidopsis thaliana (Mouse-ear cress)	3702
High	Master Protein	GLYMA_02G085500	PF07058 - Microtubule-associated protein 70 (MAP70) (1 of 10)	0	24.018	8	5	11	5	612	68.3	8.76	24.33	5	0	0.939	0.999223	62.56	135.1	64.9	29.45	103.38	High	High	High	High	High	High	1		3	3	Present Both	1	GLYMA_02G085500	GLYMA_02G085500	sp|Q8L7S4|MP702_ARATH	Microtubule-associated protein 70-2 GN=MAP70.2	ident:488/612 pos:545/612 query:612 hit:634 align:639 bit:931.0	OK	Microtubule-associated protein 70-2 (AtMAP70-2)	70 kDa microtubule-associated protein 2	MP702_ARATH	Q8L7S4	Q3MQ34; Q9FXK0	MAP70.2	na	Arabidopsis thaliana (Mouse-ear cress)	3702
High	Master Protein	GLYMA_13G266100	PF07714//PF11721//PF13855 - Protein tyrosine kinase (Pkinase_Tyr) // Di-glucose binding within endoplasmic reticulum (Malectin) // Leucine rich repeat (LRR_8) (1 of 10)	0	65.451	7	6	21	6	999	110	5.71	67.39	6	0	0.909	0.99265	56.73	94.1	105.9	1.96	77.46	High	High	High	High	High	High	1		3	3	Present Both	1	GLYMA_13G266100	GLYMA_13G266100	sp|C0LGN2|Y3148_ARATH	Probable leucine-rich repeat receptor-like serine/threonine-protein kinase At3g14840 GN=LRR-RLK	ident:586/999 pos:744/999 query:999 hit:1020 align:1020 bit:1169.8	OK	Probable leucine-rich repeat receptor-like serine/threonine-protein kinase At3g14840	na	Y3148_ARATH	C0LGN2	Q94EW5; Q9LH71	LRR-RLK	na	Arabidopsis thaliana (Mouse-ear cress)	3702
High	Master Protein	GLYMA_07G038600	PF07883 - Cupin domain (Cupin_2) (1 of 61)	0	20.345	19	2	7	2	208	21.6	9.06	26.07	2	0	0.695	0.831963	32.22	83	117	84.29	37.7	High	High	High	High	High	High	1		3	3	Present Both	1	GLYMA_07G038600	GLYMA_07G038600	sp|P94072|GL33_ARATH	Germin-like protein subfamily 3 member 3 GN=GER3	ident:127/208 pos:154/208 query:208 hit:211 align:209 bit:245.7	OK	Germin-like protein subfamily 3 member 3 (AtGER3; AtGLP2)	na	GL33_ARATH	P94072	P94028	GER3	GLP2A; GLP2B; GLP3; GLP3A; GLP3B	Arabidopsis thaliana (Mouse-ear cress)	3702
High	Master Protein	GLYMA_12G212200	PF07939 - Protein of unknown function (DUF1685) (DUF1685) (1 of 15)	0	11.444	6	1	3	1	248	28.1	7.61	11.42	1	0	1.242	0.878176	24.53	89.2	110.8		23.09	High	Not Found	Not Found	High	Not Found	High	1		1	2	Only Sample	1	GLYMA_12G212200	GLYMA_12G212200	sp|Q9M0E5|VPS15_ARATH	Serine/threonine-protein kinase VPS15 GN=VPS15	ident:16/248 pos:28/248 query:248 hit:1494 align:54 bit:31.2	Partial_match_both	Serine/threonine-protein kinase VPS15	Vacuolar protein sorting-associated protein 15 (AtVPS15)	VPS15_ARATH	Q9M0E5	na	VPS15	na	Arabidopsis thaliana (Mouse-ear cress)	3702
High	Master Protein	GLYMA_08G348200	PF08186 - Wound-inducible basic protein family (Wound_ind) (1 of 2)	0	28.606	35	2	29	2	60	6.8	9.2	80.86	2	0	2.53	0.0712537	81.73	60.5	139.5	20.51	39.08	High	High	High	High	High	High	1		3	3	Present Both	1	GLYMA_08G348200	GLYMA_08G348200	sp|Q9FG93|MNS4_ARATH	Alpha-mannosidase I MNS4 GN=MNS4	ident:16/60 pos:27/60 query:60 hit:624 align:53 bit:25.4	Partial_match_hit	Alpha-mannosidase I MNS4	na	MNS4_ARATH	Q9FG93	na	MNS4	na	Arabidopsis thaliana (Mouse-ear cress)	3702
High	Master Protein	GLYMA_07G215900	PF08263 - Leucine rich repeat N-terminal domain (LRRNT_2) (1 of 565)	0	34.667	14	4	8	4	449	49.8	8.79	22	4	0	0.68	0.809594	4.53	73.4	126.6	58.47	6.44	High	High	High	High	Peak Found	High	1		3	3	Present Both	1	GLYMA_07G215900	GLYMA_07G215900	sp|Q8W3M4|Y4744_ARATH	Uncharacterized protein At4g06744 GN=ARF46	ident:147/449 pos:213/449 query:449 hit:404 align:351 bit:264.2	Poor_match	Uncharacterized protein At4g06744	na	Y4744_ARATH	Q8W3M4	na	OrderedLocusNames=At4g06744	na	Arabidopsis thaliana (Mouse-ear cress)	3702
High	Master Protein	GLYMA_02G174400	PF10183 - ESSS subunit of NADH:ubiquinone oxidoreductase (complex I) (ESSS) (1 of 2)	0	13.704	28	2	4	2	128	14.1	7.34	13.62	2	0	0.01	9.48889e-17		200				High	Peak Found	High	High	Peak Found	High	1		3	3	Present Both	1	GLYMA_02G174400	GLYMA_02G174400	sp|Q9M310|FBK77_ARATH	F-box/kelch-repeat protein At3g61590 GN=NSFBx	ident:14/128 pos:20/128 query:128 hit:411 align:37 bit:28.9	Partial_match_both	F-box/kelch-repeat protein At3g61590	na	FBK77_ARATH	Q9M310	na	OrderedLocusNames=At3g61590	na	Arabidopsis thaliana (Mouse-ear cress)	3702
High	Master Protein	GLYMA_17G063500	PF10291 - Muniscin C-terminal mu homology domain (muHD) (1 of 2)	0	5.614	1	1	4	1	630	68.3	5.17	3.79	1	0	1.234	0.882627	27.65	89.5	110.5	49.66	6.13	High	High	Peak Found	Peak Found	High	High	1		3	3	Present Both	1	GLYMA_17G063500	GLYMA_17G063500	sp|Q682B4|BGL06_ARATH	Putative beta-glucosidase 6 GN=BGLU6	ident:14/630 pos:26/630 query:630 hit:379 align:46 bit:29.6	Partial_match_both	Putative beta-glucosidase 6 (AtBGLU6)	na	BGL06_ARATH	Q682B4	O80750	BGLU6	na	Arabidopsis thaliana (Mouse-ear cress)	3702
High	Master Protein	GLYMA_19G233100	PF10333 - GPI-Mannosyltransferase II co-activator (Pga1) (1 of 1)	0.001	2.315	3	1	4	1	235	26.7	8.24	3.29	1	0	0.557	0.498687	2.9	129	71	9.01	7.12	High	High	Not Found	Peak Found	High	Peak Found	1		2	3	Present Both	1	GLYMA_19G233100	GLYMA_19G233100	sp|F4HSQ2|SBT51_ARATH	Subtilisin-like protease SBT5.1 GN=SBT5.1	ident:19/235 pos:31/235 query:235 hit:780 align:64 bit:28.1	Partial_match_both	Subtilisin-like protease SBT5.1	Subtilase subfamily 5 member 1 (AtSBT5.1)	SBT51_ARATH	F4HSQ2	Q9LNU0	SBT5.1	na	Arabidopsis thaliana (Mouse-ear cress)	3702
High	Master Protein	GLYMA_15G116500	PF10785 - NADH-ubiquinone oxidoreductase complex I, 21 kDa subunit (NADH-u_ox-rdase) (1 of 2)	0	164.312	96	6	74	6	101	11	9.35	316.04	6	0	0.895	0.98584	33.79	107.9	92.1	4.12	1.41	High	High	High	High	High	High	1	Acetyl [N-Term]	3	3	Present Both	1	GLYMA_15G116500	GLYMA_15G116500	sp|Q9SCU0|SDR2A_ARATH	Short-chain dehydrogenase reductase 2a GN=SDR2a	ident:22/101 pos:37/101 query:101 hit:303 align:73 bit:28.1	Partial_match_hit	Short-chain dehydrogenase reductase 2a (AtSDR2a)	na	SDR2A_ARATH	Q9SCU0	na	SDR2a	SDR2	Arabidopsis thaliana (Mouse-ear cress)	3702
High	Master Protein	GLYMA_14G206700	PF10890 - Protein of unknown function (DUF2741) (DUF2741) (1 of 2)	0	29.584	33	3	38	3	72	8.3	9.66	82.88	3	0	0.733	0.870366	25.22	119.4	80.6	5.65	3	High	High	High	High	High	High	1		3	3	Present Both	1	GLYMA_14G206700	GLYMA_14G206700	sp|Q1EBV7|BASS2_ARATH	Sodium/pyruvate cotransporter BASS2, chloroplastic GN=BASS2	ident:17/72 pos:29/72 query:72 hit:409 align:55 bit:29.3	Partial_match_hit	Sodium/pyruvate cotransporter BASS2, chloroplastic	Bile acid transporter 1; Bile acid-sodium symporter family protein 2	BASS2_ARATH	Q1EBV7	O81017; Q84WD8; Q8S2V7	BASS2	BAT1; SBF1	Arabidopsis thaliana (Mouse-ear cress)	3702
Medium	Master Protein	GLYMA_05G016100	PF11833 - Protein of unknown function (DUF3353) (DUF3353) (1 of 7)	0.027	1.198	4	1	1	1	251	28.3	9.88	0	1	0	0.384	0.0994893	13.45	144.5	55.5	20.79	82.19	High	Peak Found	Not Found	Peak Found	Peak Found	Not Found	1		2	2	Present Both	1	GLYMA_05G016100	GLYMA_05G016100	sp|Q9FN50|CPP1_ARATH	Protein CHAPERONE-LIKE PROTEIN OF POR1, chloroplastic GN=CPP1	ident:168/251 pos:193/251 query:251 hit:258 align:226 bit:355.1	OK	Protein CHAPERONE-LIKE PROTEIN OF POR1, chloroplastic (AtCPP1)	Protein CELL GROWTH DEFECT FACTOR 1 (AtCDF1)	CPP1_ARATH	Q9FN50	na	CPP1	na	Arabidopsis thaliana (Mouse-ear cress)	3702
High	Master Protein	GLYMA_11G093500	PF11891 - Domain of unknown function (DUF3411) (DUF3411) (1 of 19)	0	14.946	14	5	16	1	368	39.4	9.1	20.49	5	4	0.625	0.684522	17.43	129.4	70.6	13.18	33.83	High	High	Peak Found	Peak Found	Peak Found	Peak Found	1		3	3	Present Both	1	GLYMA_11G093500	GLYMA_11G093500	sp|Q94CJ5|RER4_ARATH	Protein RETICULATA-RELATED 4, chloroplastic GN=RER4	ident:227/368 pos:265/368 query:368 hit:386 align:288 bit:488.0	OK	Protein RETICULATA-RELATED 4, chloroplastic	na	RER4_ARATH	Q94CJ5	Q67YD5	RER4	na	Arabidopsis thaliana (Mouse-ear cress)	3702
High	Master Protein	GLYMA_14G182600	PF13414 - TPR repeat (TPR_11) (1 of 152)	0	25.482	26	4	6	4	221	24.2	9.16	11.28	4	0	0.958	1	25.85	109.2	90.8	24.12	19.98	High	High	Peak Found	High	Not Found	High	1		3	2	Present Both	1	GLYMA_14G182600	GLYMA_14G182600	sp|Q8LGU6|CD27B_ARATH	Cell division cycle protein 27 homolog B GN=CDC27B	ident:26/221 pos:53/221 query:221 hit:744 align:103 bit:40.8	Partial_match_both	Cell division cycle protein 27 homolog B (CDC27 homolog B)	Protein HOBBIT	CD27B_ARATH	Q8LGU6	Q8W4M8; Q9SL81	CDC27B	HBT	Arabidopsis thaliana (Mouse-ear cress)	3702
High	Master Protein	GLYMA_01G064700	PF14111 - Domain of unknown function (DUF4283) (DUF4283) (1 of 148)	0.001	2.934	4	1	8	1	191	21.8	6.64	7.12	1	0	0.658	0.766634	7.46	121.2	78.8	40.71	8.4	High	High	High	High	High	High	1		3	3	Present Both	1	GLYMA_01G064700	GLYMA_01G064700	sp|O22960|TBL37_ARATH	Protein trichome birefringence-like 37 GN=TBL37	ident:21/191 pos:35/191 query:191 hit:385 align:77 bit:30.4	Partial_match_both	Protein trichome birefringence-like 37	na	TBL37_ARATH	O22960	na	TBL37	na	Arabidopsis thaliana (Mouse-ear cress)	3702
Medium	Master Protein	GLYMA_14G168200	PF14111 - Domain of unknown function (DUF4283) (DUF4283) (1 of 148)	0.03	1.157	2	1	3	1	247	28	6.23	5.54	1	0	0.733	0.870366	1.58	115.4	84.6	2.81		High	High	Not Found	Not Found	High	Not Found	1		2	1	Only Control	1	GLYMA_14G168200	GLYMA_14G168200	sp|O04244|Y4200_ARATH	Uncharacterized protein At4g02000 GN=Y-2	ident:34/247 pos:68/247 query:247 hit:314 align:147 bit:45.1	Partial_match_hit	Uncharacterized protein At4g02000	na	Y4200_ARATH	O04244	na	OrderedLocusNames=At4g02000	na	Arabidopsis thaliana (Mouse-ear cress)	3702
High	Master Protein	GLYMA_19G109000	PF14200 - Ricin-type beta-trefoil lectin domain-like (RicinB_lectin_2) (1 of 3)	0	216.886	31	10	50	5	326	36.3	7.09	193.85	10	6	1.285	0.849629	66.95	74.9	125.1	12.42	25.47	High	Peak Found	High	High	Peak Found	High	1		3	3	Present Both	1	GLYMA_19G109000	GLYMA_19G109000	sp|Q945P1|EULS3_ARATH	Ricin B-like lectin EULS3 GN=EULS3	ident:156/326 pos:193/326 query:326 hit:317 align:317 bit:263.5	Poor_match	Ricin B-like lectin EULS3	Euonymus lectin S3 (AtEULS3)	EULS3_ARATH	Q945P1	Q9ZV03	EULS3	na	Arabidopsis thaliana (Mouse-ear cress)	3702
High	Master Protein	GLYMA_16G043100	PF14200 - Ricin-type beta-trefoil lectin domain-like (RicinB_lectin_2) (1 of 3)	0	143.458	31	6	37	1	263	29.5	6.92	128.57	6	0	100	9.48889e-17			200		8	High	Not Found	Not Found	High	Not Found	High	1		1	2	Only Sample	1	GLYMA_16G043100	GLYMA_16G043100	sp|Q945P1|EULS3_ARATH	Ricin B-like lectin EULS3 GN=EULS3	ident:145/263 pos:179/263 query:263 hit:317 align:259 bit:258.1	OK	Ricin B-like lectin EULS3	Euonymus lectin S3 (AtEULS3)	EULS3_ARATH	Q945P1	Q9ZV03	EULS3	na	Arabidopsis thaliana (Mouse-ear cress)	3702
High	Master Protein	GLYMA_03G050400	PF14237 - Domain of unknown function (DUF4339) (DUF4339) (1 of 6)	0	6.621	3	1	3	1	529	61.6	6.32	4.92	1	0	0.831	0.946309	22.33	99.4	100.6	28.09	21.35	High	Peak Found	Peak Found	High	Peak Found	High	1		3	3	Present Both	1	GLYMA_03G050400	GLYMA_03G050400	sp|Q7Y1W1|TIC56_ARATH	Protein TIC 56, chloroplastic GN=TIC56	ident:324/529 pos:405/529 query:529 hit:527 align:499 bit:677.2	OK	Protein TIC 56, chloroplastic	Translocon at the inner envelope membrane of chloroplasts 56 (AtTIC56)	TIC56_ARATH	Q7Y1W1	Q7Y1Z4; Q9M016	TIC56	na	Arabidopsis thaliana (Mouse-ear cress)	3702
High	Master Protein	GLYMA_14G081700	PF14290 - Domain of unknown function (DUF4370) (DUF4370) (1 of 2)	0	37.776	23	5	15	5	232	25.8	6.79	43.57	5	0	0.785	0.919239	66.26	142.5	57.5	72.23	72.69	High	High	High	High	High	High	1		3	3	Present Both	1	GLYMA_14G081700	GLYMA_14G081700	sp|Q9SX77|SDH5_ARATH	Succinate dehydrogenase subunit 5, mitochondrial GN=SDH5	ident:124/232 pos:153/232 query:232 hit:257 align:180 bit:273.9	OK	Succinate dehydrogenase subunit 5, mitochondrial	na	SDH5_ARATH	Q9SX77	na	SDH5	na	Arabidopsis thaliana (Mouse-ear cress)	3702
High	Master Protein	GLYMA_01G245600	PF14308 - X-domain of DnaJ-containing (DnaJ-X) (1 of 6)	0	13.771	10	1	6	1	173	19.2	6.58	25.31	1	0	0.591	0.588015	1.13	125.7	74.3	0.84	56.71	High	High	Not Found	High	High	High	1		2	3	Present Both	1	GLYMA_01G245600	GLYMA_01G245600	sp|Q8GYX8|DNJ10_ARATH	Chaperone protein dnaJ 10 GN=ATJ10	ident:104/173 pos:129/173 query:173 hit:398 align:175 bit:172.2	Partial_match_hit	Chaperone protein dnaJ 10 (AtDjC10; AtJ10)	na	DNJ10_ARATH	Q8GYX8	O04662; Q9SRE3	ATJ10	C10; J10	Arabidopsis thaliana (Mouse-ear cress)	3702
High	Master Protein	GLYMA_05G220300	PF14604 - Variant SH3 domain (SH3_9) (1 of 10)	0	30.177	9	6	13	6	1180	127.9	5.6	35.83	6	0	0.836	0.950262	19.69	124.2	75.8	20.35	36.86	High	High	Peak Found	High	High	High	1		3	3	Present Both	1	GLYMA_05G220300	GLYMA_05G220300	sp|Q9XID0|FAB1D_ARATH	Putative 1-phosphatidylinositol-3-phosphate 5-kinase FAB1D GN=FAB1D	ident:28/1180 pos:52/1180 query:1180 hit:1456 align:91 bit:34.7	Partial_match_both	Putative 1-phosphatidylinositol-3-phosphate 5-kinase FAB1D (Phosphatidylinositol 3-phosphate 5-kinase)	Phosphatidylinositol 3-phosphate 5-kinase type III (PIPkin-III; Type III PIP kinase); Protein FORMS APLOID AND BINUCLEATE CELLS 1D	FAB1D_ARATH	Q9XID0	na	FAB1D	na	Arabidopsis thaliana (Mouse-ear cress)	3702
High	Master Protein	GLYMA_08G219700	PF15054 - Domain of unknown function (DUF4535) (DUF4535) (1 of 7)	0.001	2.691	9	1	2	1	120	13.5	9.42	0	1	0	0.987	0.999223	75.87	134.2	65.8	53.03	55.21	High	Peak Found	Peak Found	Peak Found	Peak Found	High	1		3	3	Present Both	1	GLYMA_08G219700	GLYMA_08G219700	sp|Q9SRV5|METE2_ARATH	5-methyltetrahydropteroyltriglutamate--homocysteine methyltransferase 2 GN=MS2	ident:14/120 pos:27/120 query:120 hit:765 align:55 bit:26.2	Partial_match_both	5-methyltetrahydropteroyltriglutamate--homocysteine methyltransferase 2	Cobalamin-independent methionine synthase 2 (AtMS2)	METE2_ARATH	Q9SRV5	Q94BN4	MS2	na	Arabidopsis thaliana (Mouse-ear cress)	3702
High	Master Protein	GLYMA_05G184800	PF15704 - Mitochondrial ATP synthase subunit (Mt_ATP_synt) (1 of 3)	0	452.598	76	28	233	5	241	27.5	6.44	808.47	28	27	0.559	0.5053	26.73	151.3	48.7	42.67	55.29	High	High	High	High	High	High	1		3	3	Present Both	1	GLYMA_05G184800	GLYMA_05G184800	sp|Q9SJ12|ATP7_ARATH	Probable ATP synthase 24 kDa subunit, mitochondrial GN=ATL77	ident:169/241 pos:205/241 query:241 hit:240 align:241 bit:342.4	OK	Probable ATP synthase 24 kDa subunit, mitochondrial	na	ATP7_ARATH	Q9SJ12	Q8LBN3	OrderedLocusNames=At2g21870	na	Arabidopsis thaliana (Mouse-ear cress)	3702
High	Master Protein	GLYMA_08G142800	PF15704 - Mitochondrial ATP synthase subunit (Mt_ATP_synt) (1 of 3)	0	434.686	75	26	226	3	241	27.5	6.84	755.26	26	0	0.685	0.815367	28.16	110.7	89.3	10.33	6.82	High	High	Peak Found	High	High	High	1		3	3	Present Both	1	GLYMA_08G142800	GLYMA_08G142800	sp|Q9SJ12|ATP7_ARATH	Probable ATP synthase 24 kDa subunit, mitochondrial GN=ATL77	ident:164/241 pos:205/241 query:241 hit:240 align:241 bit:337.0	OK	Probable ATP synthase 24 kDa subunit, mitochondrial	na	ATP7_ARATH	Q9SJ12	Q8LBN3	OrderedLocusNames=At2g21870	na	Arabidopsis thaliana (Mouse-ear cress)	3702
High	Master Protein	GLYMA_U031100	PF15811 - Small VCP/p97-interacting protein (SVIP) (1 of 4)	0	8.573	61	3	6	3	76	8.4	8.97	11.94	3	0	1.25	0.870768	13.95	75.2	124.8	8.79	53.68	High	Peak Found	Not Found	High	Peak Found	High	1		2	3	Present Both	1	GLYMA_U031100	GLYMA_U031100	sp|F4IAG2|SSY3_ARATH	Starch synthase 3, chloroplastic/amyloplastic GN=SS3	ident:16/76 pos:26/76 query:76 hit:1042 align:45 bit:26.9	Partial_match_hit	Starch synthase 3, chloroplastic/amyloplastic (AtSS3)	Soluble starch synthase III	SSY3_ARATH	F4IAG2	Q1WAB7; Q306T0; Q9SAA5	SS3	na	Arabidopsis thaliana (Mouse-ear cress)	3702
High	Master Protein	GLYMA_02G233700	PF16940 - Chloroplast envelope transporter (Tic110) (1 of 4)	0	81.731	12	9	38	3	995	109.9	6.33	142.56	9	0	1.318	0.833135	110.84	134	66	32.43	83.8	High	High	High	High	High	High	1		3	3	Present Both	1	GLYMA_02G233700	GLYMA_02G233700	sp|Q8LPR9|TI110_ARATH	Protein TIC110, chloroplastic GN=TIC110	ident:689/995 pos:832/995 query:995 hit:1016 align:1004 bit:1379.8	OK	Protein TIC110, chloroplastic	Translocon at the inner envelope membrane of chloroplasts 110 (AtTIC110)	TI110_ARATH	Q8LPR9	Q0WMF8; Q8LPG5; Q9LMI9; Q9M9Z7	TIC110	na	Arabidopsis thaliana (Mouse-ear cress)	3702
High	Master Protein	GLYMA_14G201500	PF16940 - Chloroplast envelope transporter (Tic110) (1 of 4)	0	76.843	12	9	37	3	996	109.8	6.19	132.93	9	4	0.416	0.160524	14.76	161.6	38.4	2.17	108.63	High	High	Peak Found	High	High	High	1		3	3	Present Both	1	GLYMA_14G201500	GLYMA_14G201500	sp|Q8LPR9|TI110_ARATH	Protein TIC110, chloroplastic GN=TIC110	ident:697/996 pos:841/996 query:996 hit:1016 align:1004 bit:1397.9	OK	Protein TIC110, chloroplastic	Translocon at the inner envelope membrane of chloroplasts 110 (AtTIC110)	TI110_ARATH	Q8LPR9	Q0WMF8; Q8LPG5; Q9LMI9; Q9M9Z7	TIC110	na	Arabidopsis thaliana (Mouse-ear cress)	3702
High	Master Protein	GLYMA_04G061900	PTHR10050 - DOLICHYL-PHOSPHATE-MANNOSE--PROTEIN MANNOSYLTRANSFERASE (1 of 2)	0	66.458	33	4	18	4	222	24.3	7.33	76.15	4	0	0.909	0.99265	50.96	92.6	107.4	11.59	64.48	High	High	High	High	High	High	1		3	3	Present Both	1	GLYMA_04G061900	GLYMA_04G061900	sp|Q93ZE8|SDF2_ARATH	Stromal cell-derived factor 2-like protein GN=SDF2	ident:177/222 pos:196/222 query:222 hit:218 align:221 bit:374.4	OK	Stromal cell-derived factor 2-like protein (AtSDF2; SDF2-like protein)	na	SDF2_ARATH	Q93ZE8	O81720; Q9SEZ5	SDF2	na	Arabidopsis thaliana (Mouse-ear cress)	3702
High	Master Protein	GLYMA_10G158700	PTHR10110:SF117 - SODIUM/HYDROGEN EXCHANGER 1-RELATED (1 of 7)	0	26.918	7	3	11	2	546	60.1	7.25	29.52	3	2	1.806	0.370984	47.76	48.9	151.1	34.64	51.29	High	High	Peak Found	High	High	High	1	Phospho [S536]	3	3	Present Both	1	GLYMA_10G158700	GLYMA_10G158700	sp|Q56XP4|NHX2_ARATH	Sodium/hydrogen exchanger 2 GN=NHX2	ident:419/546 pos:470/546 query:546 hit:546 align:541 bit:853.2	OK	Sodium/hydrogen exchanger 2	Na(+)/H(+) exchanger 2 (NHE-2)	NHX2_ARATH	Q56XP4	Q9CAW6	NHX2	na	Arabidopsis thaliana (Mouse-ear cress)	3702
High	Master Protein	GLYMA_20G111200	PTHR10121//PTHR10121:SF1 - COATOMER SUBUNIT DELTA // SUBFAMILY NOT NAMED (1 of 2)	0	24.035	7	3	6	3	530	58.4	5.83	25.9	3	0	0.199	0.000294427	0	171.6	28.4	25.66		High	Not Found	High	High	Not Found	High	1		2	2	Present Both	1	GLYMA_20G111200	GLYMA_20G111200	sp|Q93Y22|COPD_ARATH	Coatomer subunit delta GN=COP10	ident:404/530 pos:458/530 query:530 hit:527 align:533 bit:795.0	OK	Coatomer subunit delta	Delta-coat protein (Delta-COP)	COPD_ARATH	Q93Y22	Q56WY5; Q93Y42; Q9FF73	OrderedLocusNames=At5g05010	na	Arabidopsis thaliana (Mouse-ear cress)	3702
High	Master Protein	GLYMA_15G168700	PTHR10168:SF112 - GLUTAREDOXIN-C4 (1 of 2)	0	23.697	29	3	10	1	134	14.9	6.4	19.26	3	2	0.824	0.943109	59.05	142.5	57.5	48.96	54.62	High	Not Found	Peak Found	High	Peak Found	High	1		2	3	Present Both	1	GLYMA_15G168700	GLYMA_15G168700	sp|Q8LFQ6|GRXC4_ARATH	Glutaredoxin-C4 GN=GRXC4	ident:80/134 pos:100/134 query:134 hit:135 align:117 bit:169.5	OK	Glutaredoxin-C4 (AtGrxC4)	na	GRXC4_ARATH	Q8LFQ6	Q9M457	GRXC4	GLU1	Arabidopsis thaliana (Mouse-ear cress)	3702
High	Master Protein	GLYMA_09G062300	PTHR10168:SF112 - GLUTAREDOXIN-C4 (1 of 2)	0	17.426	29	3	8	1	133	14.6	7.11	11.68	3	0	1.132	0.940038	27.91	93.8	106.2	48.16	13.2	High	High	Peak Found	Peak Found	Peak Found	High	1		3	3	Present Both	1	GLYMA_09G062300	GLYMA_09G062300	sp|Q8LFQ6|GRXC4_ARATH	Glutaredoxin-C4 GN=GRXC4	ident:84/133 pos:103/133 query:133 hit:135 align:125 bit:177.2	OK	Glutaredoxin-C4 (AtGrxC4)	na	GRXC4_ARATH	Q8LFQ6	Q9M457	GRXC4	GLU1	Arabidopsis thaliana (Mouse-ear cress)	3702
Medium	Master Protein	GLYMA_04G181000	PTHR10217:SF479 - CYCLIC NUCLEOTIDE-GATED ION CHANNEL 16-RELATED (1 of 3)	0.011	1.804	1	1	1	1	687	79.4	9.16	1.66	1	0	0.381	0.0967544	2.79	146.4	53.6	62.88	8.64	High	Peak Found	Peak Found	Peak Found	Peak Found	Peak Found	1		3	3	Present Both	1	GLYMA_04G181000	GLYMA_04G181000	sp|Q9SU64|CNG16_ARATH	Probable cyclic nucleotide-gated ion channel 16 GN=CNGC16	ident:457/687 pos:537/687 query:687 hit:705 align:698 bit:922.9	OK	Probable cyclic nucleotide-gated ion channel 16	Cyclic nucleotide- and calmodulin-regulated ion channel 16	CNG16_ARATH	Q9SU64	Q1PEH4	CNGC16	na	Arabidopsis thaliana (Mouse-ear cress)	3702
High	Master Protein	GLYMA_13G065000	PTHR10264//PTHR10264:SF93 - BAND 7 PROTEIN-RELATED // SUBFAMILY NOT NAMED (1 of 7)	0	497.053	52	25	215	10	286	31.5	5.24	755.87	25	18	1.059	0.976873	61.52	95.4	104.6	1.08	12.15	High	High	High	High	High	High	1		3	3	Present Both	1	GLYMA_13G065000	GLYMA_13G065000	sp|Q9FM19|HIR1_ARATH	Hypersensitive-induced response protein 1 GN=HIR1	ident:242/286 pos:263/286 query:286 hit:286 align:284 bit:505.0	OK	Hypersensitive-induced response protein 1 (AtHIR1)	na	HIR1_ARATH	Q9FM19	na	HIR1	na	Arabidopsis thaliana (Mouse-ear cress)	3702
High	Master Protein	GLYMA_19G020000	PTHR10264//PTHR10264:SF93 - BAND 7 PROTEIN-RELATED // SUBFAMILY NOT NAMED (1 of 7)	0	470.803	52	25	214	10	286	31.5	5.24	791.32	25	0	0.878	0.976873	25.49	87.2	112.8	38.79	38.31	High	High	High	High	High	High	1	Phospho [D276]	3	3	Present Both	1	GLYMA_19G020000	GLYMA_19G020000	sp|Q9FM19|HIR1_ARATH	Hypersensitive-induced response protein 1 GN=HIR1	ident:242/286 pos:265/286 query:286 hit:286 align:284 bit:506.1	OK	Hypersensitive-induced response protein 1 (AtHIR1)	na	HIR1_ARATH	Q9FM19	na	HIR1	na	Arabidopsis thaliana (Mouse-ear cress)	3702
High	Master Protein	GLYMA_02G021400	PTHR10264//PTHR10264:SF93 - BAND 7 PROTEIN-RELATED // SUBFAMILY NOT NAMED (1 of 7)	0	63.984	21	7	40	1	286	31.4	5.44	105.08	7	0	1.806	0.370984	59.32	64	136	24.33	41.13	High	High	Not Found	High	Peak Found	High	1		2	3	Present Both	1	GLYMA_02G021400	GLYMA_02G021400	sp|Q9FM19|HIR1_ARATH	Hypersensitive-induced response protein 1 GN=HIR1	ident:242/286 pos:267/286 query:286 hit:286 align:283 bit:508.1	OK	Hypersensitive-induced response protein 1 (AtHIR1)	na	HIR1_ARATH	Q9FM19	na	HIR1	na	Arabidopsis thaliana (Mouse-ear cress)	3702
High	Master Protein	GLYMA_04G226400	PTHR10264:SF27 - STOMATIN-LIKE PROTEIN 2, MITOCHONDRIAL (1 of 2)	0	211.422	44	14	103	4	404	43.9	9.11	300.24	14	0	1.197	0.904524	51.08	105.1	94.9	71.16	18.38	High	High	High	High	High	High	1		3	3	Present Both	1	GLYMA_04G226400	GLYMA_04G226400	sp|Q9SRH6|HIR3_ARATH	Hypersensitive-induced response protein 3 GN=HIR3	ident:54/404 pos:100/404 query:404 hit:285 align:193 bit:73.2	Partial_match_query	Hypersensitive-induced response protein 3 (AtHIR3)	na	HIR3_ARATH	Q9SRH6	na	HIR3	P31	Arabidopsis thaliana (Mouse-ear cress)	3702
High	Master Protein	GLYMA_06G138500	PTHR10264:SF27 - STOMATIN-LIKE PROTEIN 2, MITOCHONDRIAL (1 of 2)	0	194.4	38	15	98	5	404	44	9.2	272.94	15	13	1.002	0.999223	50.3	102.1	97.9	20.43	6.07	High	High	Peak Found	High	High	High	1		3	3	Present Both	1	GLYMA_06G138500	GLYMA_06G138500	sp|Q9SRH6|HIR3_ARATH	Hypersensitive-induced response protein 3 GN=HIR3	ident:54/404 pos:100/404 query:404 hit:285 align:193 bit:72.8	Partial_match_query	Hypersensitive-induced response protein 3 (AtHIR3)	na	HIR3_ARATH	Q9SRH6	na	HIR3	P31	Arabidopsis thaliana (Mouse-ear cress)	3702
High	Master Protein	GLYMA_09G154400	PTHR10264:SF69 - HYPERSENSITIVE-INDUCED RESPONSE PROTEIN 4 (1 of 2)	0	79.438	35	7	18	7	292	32.6	5.22	58.32	7	0	1.138	0.935704	26.37	95	105	74.18	6.77	High	Peak Found	High	High	Peak Found	High	1		3	3	Present Both	1	GLYMA_09G154400	GLYMA_09G154400	sp|Q9FHM7|HIR4_ARATH	Hypersensitive-induced response protein 4 GN=HIR4	ident:244/292 pos:269/292 query:292 hit:292 align:290 bit:516.2	OK	Hypersensitive-induced response protein 4 (AtHIR4)	na	HIR4_ARATH	Q9FHM7	na	HIR4	na	Arabidopsis thaliana (Mouse-ear cress)	3702
High	Master Protein	GLYMA_05G029800.3.p	PTHR10264:SF92 - HYPERSENSITIVE-INDUCED RESPONSE PROTEIN 1 (1 of 4)	0	272.048	45	19	117	7	284	31.3	7.01	356.5	19	2	1.112	0.944642	70.64	83.5	116.5	29.69	44.97	High	High	High	High	High	High	1		3	3	Present Both	1	GLYMA_05G029800.3.p	GLYMA_05G029800.3.p	sp|Q9FM19|HIR1_ARATH	Hypersensitive-induced response protein 1 GN=HIR1	ident:248/284 pos:270/284 query:284 hit:286 align:282 bit:519.6	OK	Hypersensitive-induced response protein 1 (AtHIR1)	na	HIR1_ARATH	Q9FM19	na	HIR1	na	Arabidopsis thaliana (Mouse-ear cress)	3702
High	Master Protein	GLYMA_17G097000.2.p	PTHR10264:SF92 - HYPERSENSITIVE-INDUCED RESPONSE PROTEIN 1 (1 of 4)	0	177.157	41	16	87	6	284	31.4	6.42	245.03	16	0	1.094	0.956412	59.44	104	96	44.67	12.95	High	High	High	High	High	High	1		3	3	Present Both	1	GLYMA_17G097000.2.p	GLYMA_17G097000.2.p	sp|Q9FM19|HIR1_ARATH	Hypersensitive-induced response protein 1 GN=HIR1	ident:253/284 pos:270/284 query:284 hit:286 align:282 bit:528.1	OK	Hypersensitive-induced response protein 1 (AtHIR1)	na	HIR1_ARATH	Q9FM19	na	HIR1	na	Arabidopsis thaliana (Mouse-ear cress)	3702
High	Master Protein	GLYMA_10G295400.3.p	PTHR10277//PTHR10277:SF42 - HOMOCITRATE SYNTHASE-RELATED // SUBFAMILY NOT NAMED (1 of 3)	0	63.494	19	7	18	7	620	67.3	6.84	53.22	7	0	1.285	0.849629	53.18	64.8	135.2	57.02	17.18	High	High	High	High	High	High	1		3	3	Present Both	1	GLYMA_10G295400.3.p	GLYMA_10G295400.3.p	sp|Q9C550|LEU12_ARATH	2-isopropylmalate synthase 2, chloroplastic GN=IPMS2	ident:464/620 pos:530/620 query:620 hit:631 align:606 bit:956.1	OK	2-isopropylmalate synthase 2, chloroplastic	2-isopropylmalate synthase 1; Methylthioalkylmalate synthase-like 3	LEU12_ARATH	Q9C550	Q8GWX8	IPMS2	IMS1; MAML-3	Arabidopsis thaliana (Mouse-ear cress)	3702
High	Master Protein	GLYMA_10G237000	PTHR10281:SF45 - MEMBRANE STEROID-BINDING PROTEIN 1-RELATED (1 of 5)	0	55.754	24	5	24	2	235	25.9	5.11	72.21	5	4	1.106	0.946309	78.22	148.4	51.6	51.87	98.86	High	High	Peak Found	High	High	High	1		3	3	Present Both	1	GLYMA_10G237000	GLYMA_10G237000	sp|Q9XFM6|MSBP1_ARATH	Membrane steroid-binding protein 1 GN=MSBP1	ident:142/235 pos:163/235 query:235 hit:220 align:215 bit:277.7	OK	Membrane steroid-binding protein 1 (AtMP1)	Membrane-associated progesterone-binding protein 5 (AtMAPR5)	MSBP1_ARATH	Q9XFM6	Q9LTJ7	MSBP1	MAPR5 MP1	Arabidopsis thaliana (Mouse-ear cress)	3702
High	Master Protein	GLYMA_16G194100	PTHR10281:SF45 - MEMBRANE STEROID-BINDING PROTEIN 1-RELATED (1 of 5)	0	26.789	14	3	18	1	222	24.2	4.64	45.99	3	0	1.831	0.366835	77.43	121.4	78.6	74.68	117.13	High	High	Peak Found	Peak Found	High	Not Found	1		3	2	Present Both	1	GLYMA_16G194100	GLYMA_16G194100	sp|Q9M2Z4|MSBP2_ARATH	Membrane steroid-binding protein 2 GN=MSBP2	ident:142/222 pos:160/222 query:222 hit:233 align:213 bit:270.0	OK	Membrane steroid-binding protein 2 (AtMP2)	Membrane-associated progesterone-binding protein 3 (AtMAPR3)	MSBP2_ARATH	Q9M2Z4	Q9XFM5	MSBP2	MAPR3; MP2	Arabidopsis thaliana (Mouse-ear cress)	3702
High	Master Protein	GLYMA_10G045800	PTHR10366//PTHR10366:SF361 - NAD DEPENDENT EPIMERASE/DEHYDRATASE // SUBFAMILY NOT NAMED (1 of 3)	0	9.186	6	3	8	2	427	48	9.35	11.04	3	0	0.648	0.74527	10.7	121.6	78.4	9.54	73.17	High	High	Peak Found	Peak Found	High	Peak Found	1		3	3	Present Both	1	GLYMA_10G045800	GLYMA_10G045800	sp|Q8VZC0|UXS1_ARATH	UDP-glucuronic acid decarboxylase 1 GN=UXS1	ident:361/427 pos:384/427 query:427 hit:435 align:437 bit:729.9	OK	UDP-glucuronic acid decarboxylase 1	UDP-XYL synthase 1; UDP-glucuronate decarboxylase 1 (UGD; UXS-1)	UXS1_ARATH	Q8VZC0	Q3EAK3; Q9LFG7	UXS1	na	Arabidopsis thaliana (Mouse-ear cress)	3702
High	Master Protein	GLYMA_10G018400	PTHR10366:SF465 - UDP-GLUCURONIC ACID DECARBOXYLASE 1 (1 of 6)	0	109.042	26	13	49	4	427	48	8.92	124.65	13	7	0.728	0.870366	38.59	136.6	63.4	39.56	39.72	High	High	High	High	High	High	1		3	3	Present Both	1	GLYMA_10G018400	GLYMA_10G018400	sp|Q9LZI2|UXS2_ARATH	UDP-glucuronic acid decarboxylase 2 GN=UXS2	ident:356/427 pos:384/427 query:427 hit:445 align:435 bit:723.0	OK	UDP-glucuronic acid decarboxylase 2	UDP-XYL synthase 2; UDP-glucuronate decarboxylase 2 (UGD; UXS-2); dTDP-glucose 4-6-dehydratase homolog D18	UXS2_ARATH	Q9LZI2	Q39077	UXS2	AUD1; D18	Arabidopsis thaliana (Mouse-ear cress)	3702
High	Master Protein	GLYMA_13G367000	PTHR10371 - NADH DEHYDROGENASE UBIQUINONE FLAVOPROTEIN 2, MITOCHONDRIAL (1 of 2)	0	104.976	30	8	64	8	299	33.6	7.05	184.85	8	0	0.788	0.919239	32.34	123.7	76.3	35.32	17.47	High	High	High	High	High	High	1		3	3	Present Both	1	GLYMA_13G367000	GLYMA_13G367000	sp|O22769|NDUV2_ARATH	NADH dehydrogenase [ubiquinone] flavoprotein 2, mitochondrial GN=NDL3	ident:191/299 pos:203/299 query:299 hit:255 align:220 bit:405.2	OK	NADH dehydrogenase [ubiquinone] flavoprotein 2, mitochondrial	na	NDUV2_ARATH	O22769	Q940Z9	OrderedLocusNames=At4g02580	na	Arabidopsis thaliana (Mouse-ear cress)	3702
High	Master Protein	GLYMA_07G261400	PTHR10374:SF17 - GLYOXALASE I HOMOLOG (1 of 3)	0	8.072	5	1	2	1	280	31.6	5.9	4.9	1	0	0.508	0.370984	21.8	111.5	88.5	88.99	62.52	High	Peak Found	Peak Found	High	Not Found	Peak Found	1		3	2	Present Both	1	GLYMA_07G261400	GLYMA_07G261400	sp|O65398|GLX1_ARATH	Lactoylglutathione lyase GLX1 GN=GLX1	ident:217/280 pos:252/280 query:280 hit:283 align:279 bit:462.6	OK	Lactoylglutathione lyase GLX1	Glyoxalase I (AtGLX1; GlyI)	GLX1_ARATH	O65398	B9DFN6; B9DGT0; F4IAH9; Q3EDE2; Q940A4	GLX1	na	Arabidopsis thaliana (Mouse-ear cress)	3702
High	Master Protein	GLYMA_07G084100	PTHR10430 - PEROXIREDOXIN (1 of 9)	0	136.738	37	9	50	9	162	17.4	5.59	164.23	9	0	1.211	0.897622	57.01	84.6	115.4	55.33	11.59	High	High	High	High	High	High	1		3	3	Present Both	1	GLYMA_07G084100	GLYMA_07G084100	sp|Q9XEX2|PRX2B_ARATH	Peroxiredoxin-2B GN=PRXIIB	ident:126/162 pos:149/162 query:162 hit:162 align:162 bit:273.9	OK	Peroxiredoxin-2B	Peroxiredoxin IIB; Peroxiredoxin TPx1; Thioredoxin peroxidase 2B; Thioredoxin-dependent peroxidase 1	PRX2B_ARATH	Q9XEX2	na	PRXIIB	TPX1	Arabidopsis thaliana (Mouse-ear cress)	3702
High	Master Protein	GLYMA_19G190800	PTHR10430:SF16 - PEROXIREDOXIN-5, MITOCHONDRIAL (1 of 2)	0	20.972	8	1	6	1	215	23	7.96	11.75	1	0	0.564	0.520932	20.94	137.2	62.8	67.87	25.96	High	Not Found	Peak Found	High	High	High	1		2	3	Present Both	1	GLYMA_19G190800	GLYMA_19G190800	sp|Q949U7|PRX2E_ARATH	Peroxiredoxin-2E, chloroplastic GN=PRXIIE	ident:144/215 pos:178/215 query:215 hit:234 align:234 bit:280.0	OK	Peroxiredoxin-2E, chloroplastic	Peroxiredoxin IIE; Thioredoxin peroxidase 2E	PRX2E_ARATH	Q949U7	Q9LF96	PRXIIE	na	Arabidopsis thaliana (Mouse-ear cress)	3702
High	Master Protein	GLYMA_13G207000	PTHR10430:SF7 - PEROXIREDOXIN-2F, MITOCHONDRIAL (1 of 4)	0	59.702	41	5	13	5	197	21.2	8.63	44.47	5	0	0.506	0.370984	9.17	135.9	64.1	29.49	29.07	High	High	High	High	High	High	1		3	3	Present Both	1	GLYMA_13G207000	GLYMA_13G207000	sp|Q9M7T0|PRX2F_ARATH	Peroxiredoxin-2F, mitochondrial GN=PRXIIF	ident:139/197 pos:156/197 query:197 hit:201 align:182 bit:292.0	OK	Peroxiredoxin-2F, mitochondrial	Peroxiredoxin IIF; Thioredoxin peroxidase 2F	PRX2F_ARATH	Q9M7T0	Q8LEJ1; Q8LPM1; Q941C2	PRXIIF	na	Arabidopsis thaliana (Mouse-ear cress)	3702
Medium	Master Protein	GLYMA_09G273200	PTHR10438:SF240 - THIOREDOXIN H9 (1 of 4)	0.028	1.186	8	1	2	1	169	19.2	6.34	4.01	1	0	1.241	0.878176	26.84	89.2	110.8		25.19	High	High	Not Found	Peak Found	Not Found	Peak Found	1		2	2	Present Both	1	GLYMA_09G273200	GLYMA_09G273200	sp|Q9C9Y6|TRXH9_ARATH	Thioredoxin H9 GN=TRX9	ident:99/169 pos:119/169 query:169 hit:140 align:139 bit:212.2	OK	Thioredoxin H9 (AtTrxh9)	Thioredoxin 9 (AtTRX9)	TRXH9_ARATH	Q9C9Y6	na	TRX9	ATH9	Arabidopsis thaliana (Mouse-ear cress)	3702
High	Master Protein	GLYMA_15G063100	PTHR10438:SF242 - THIOREDOXIN-LIKE PROTEIN CXXS1 (1 of 7)	0	43.846	29	6	17	6	124	13.7	4.7	42.38	6	0	1.41	0.748831	64.84	93.2	106.8	57.94	41.61	High	High	Peak Found	High	High	High	1		3	3	Present Both	1	GLYMA_15G063100	GLYMA_15G063100	sp|Q8LDI5|CXXS1_ARATH	Thioredoxin-like protein CXXS1 GN=CXXS1	ident:75/124 pos:94/124 query:124 hit:118 align:113 bit:164.9	OK	Thioredoxin-like protein CXXS1 (AtCXXS1)	Mono-cysteine thioredoxin 1	CXXS1_ARATH	Q8LDI5	Q2HIL3; Q9SYX9; Q9XH49	CXXS1	na	Arabidopsis thaliana (Mouse-ear cress)	3702
High	Master Protein	GLYMA_06G266700	PTHR10438:SF242 - THIOREDOXIN-LIKE PROTEIN CXXS1 (1 of 7)	0	6.998	9	2	3	2	126	14.3	9.39	6.55	2	0	1.082	0.964419	109.81	116.5	83.5	45.22	88.3	High	High	Peak Found	High	Peak Found	Peak Found	1		3	3	Present Both	1	GLYMA_06G266700	GLYMA_06G266700	sp|Q8LDI5|CXXS1_ARATH	Thioredoxin-like protein CXXS1 GN=CXXS1	ident:59/126 pos:86/126 query:126 hit:118 align:109 bit:141.0	Poor_match	Thioredoxin-like protein CXXS1 (AtCXXS1)	Mono-cysteine thioredoxin 1	CXXS1_ARATH	Q8LDI5	Q2HIL3; Q9SYX9; Q9XH49	CXXS1	na	Arabidopsis thaliana (Mouse-ear cress)	3702
High	Master Protein	GLYMA_13G199500.2.p	PTHR10502//PTHR10502:SF113 - ANNEXIN // SUBFAMILY NOT NAMED (1 of 11)	0	132.166	49	16	81	4	314	35.8	7.97	190.67	16	8	0.983	0.999223	54.64	120.2	79.8	47.21	29.27	High	High	Peak Found	High	High	High	1		3	3	Present Both	1	GLYMA_13G199500.2.p	GLYMA_13G199500.2.p	sp|Q94CK4|ANXD8_ARATH	Annexin D8 GN=ANNAT8	ident:179/314 pos:240/314 query:314 hit:316 align:311 bit:379.4	OK	Annexin D8	AnnAt8	ANXD8_ARATH	Q94CK4	na	ANNAT8	ANN8	Arabidopsis thaliana (Mouse-ear cress)	3702
High	Master Protein	GLYMA_11G153800	PTHR10502//PTHR10502:SF113 - ANNEXIN // SUBFAMILY NOT NAMED (1 of 11)	0	65.597	26	9	33	6	312	35.9	7.91	72.98	9	0	0.634	0.712031	13.89	147.1	52.9	57.63	13.24	High	High	High	High	High	High	1		3	3	Present Both	1	GLYMA_11G153800	GLYMA_11G153800	sp|Q94CK4|ANXD8_ARATH	Annexin D8 GN=ANNAT8	ident:167/312 pos:233/312 query:312 hit:316 align:311 bit:355.9	OK	Annexin D8	AnnAt8	ANXD8_ARATH	Q94CK4	na	ANNAT8	ANN8	Arabidopsis thaliana (Mouse-ear cress)	3702
High	Master Protein	GLYMA_09G171600.2.p	PTHR10502//PTHR10502:SF120 - ANNEXIN // SUBFAMILY NOT NAMED (1 of 3)	0	18.727	14	4	12	4	317	35.5	8.76	17.43	4	0	1.009	0.99265	71.11	68.3	131.7	30.61	6.86	High	High	High	High	High	High	1		3	3	Present Both	1	GLYMA_09G171600.2.p	GLYMA_09G171600.2.p	sp|Q9C9X3|ANXD5_ARATH	Annexin D5 GN=ANN5	ident:177/317 pos:235/317 query:317 hit:316 align:316 bit:370.9	OK	Annexin D5	AnnAt5	ANXD5_ARATH	Q9C9X3	A0MEF1; Q1PFF4; Q9C5V4	ANN5	ANNAT5	Arabidopsis thaliana (Mouse-ear cress)	3702
High	Master Protein	GLYMA_13G088700	PTHR10502:SF98 - ANNEXIN D1-RELATED (1 of 5)	0	103.664	34	14	49	13	316	35.9	6.96	124.45	14	1	1.278	0.856869	62.49	99	101	69.66	39.09	High	High	High	High	High	High	1		3	3	Present Both	1	GLYMA_13G088700	GLYMA_13G088700	sp|Q9SYT0|ANXD1_ARATH	Annexin D1 GN=ANN1	ident:226/316 pos:268/316 query:316 hit:317 align:317 bit:472.2	OK	Annexin D1	AnnAt1; Annexin A1	ANXD1_ARATH	Q9SYT0	Q39001; Q42023; Q56Y94; Q96527	ANN1	ANNAT1; ANX23-ATH; ATOXY5; OXY5	Arabidopsis thaliana (Mouse-ear cress)	3702
High	Master Protein	GLYMA_15G238500	PTHR10502:SF99 - ANNEXIN D3 (1 of 2)	0	9.758	10	3	5	3	320	36	6.15	8.95	3	0	1.097	0.951285	43.58	83.1	116.9	33.75	7.39	High	Peak Found	Peak Found	High	Not Found	High	1		3	2	Present Both	1	GLYMA_15G238500	GLYMA_15G238500	sp|Q9SE45|ANXD3_ARATH	Annexin D3 GN=ANN3	ident:187/320 pos:244/320 query:320 hit:321 align:318 bit:386.3	OK	Annexin D3	AnnAt3	ANXD3_ARATH	Q9SE45	Q9ZVJ7	ANN3	ANNAT3	Arabidopsis thaliana (Mouse-ear cress)	3702
High	Master Protein	GLYMA_02G103500	PTHR10509//PTHR10509:SF23 - O-METHYLTRANSFERASE-RELATED // SUBFAMILY NOT NAMED (1 of 5)	0	3.319	3	1	3	1	325	36.9	7.05	4.12	1	0	1.057	0.976873	15.63	97.2	102.8	14.82		High	High	Not Found	Not Found	High	Not Found	1		2	1	Only Control	1	GLYMA_02G103500	GLYMA_02G103500	sp|O49499|CAMT4_ARATH	Caffeoyl-CoA O-methyltransferase 1 GN=CCOAOMT1	ident:219/325 pos:234/325 query:325 hit:259 align:244 bit:464.5	OK	Caffeoyl-CoA O-methyltransferase 1	Trans-caffeoyl-CoA 3-O-methyltransferase (CCoAMT; CCoAOMT1)	CAMT4_ARATH	O49499	Q8L989	CCOAOMT1	na	Arabidopsis thaliana (Mouse-ear cress)	3702
High	Master Protein	GLYMA_12G096600	PTHR10516:SF322 - OUTER ENVELOPE PROTEIN 61, CHLOROPLASTIC (1 of 2)	0	10.803	8	5	6	5	582	64.3	6.29	4.08	5	0	0.646	0.738375	28.13	135.6	64.4	55.74	24.8	High	High	Peak Found	Peak Found	Peak Found	High	1		3	3	Present Both	1	GLYMA_12G096600	GLYMA_12G096600	sp|B7ZWR6|OEP61_ARATH	Outer envelope protein 61 GN=OEP61	ident:346/582 pos:441/582 query:582 hit:554 align:593 bit:667.9	OK	Outer envelope protein 61	Tetratricopeptide repeat domain-containing protein 7	OEP61_ARATH	B7ZWR6	Q8GWM6; Q9C588	OEP61	TPR7	Arabidopsis thaliana (Mouse-ear cress)	3702
High	Master Protein	GLYMA_02G231800	PTHR10555//PTHR10555:SF155 - SORTING NEXIN // SUBFAMILY NOT NAMED (1 of 4)	0	26.113	11	4	8	3	558	61.9	5.4	23.5	4	1	0.923	0.999223	23.4	106.4	93.6	24.64	48.52	High	Peak Found	Peak Found	High	High	High	1		3	3	Present Both	1	GLYMA_02G231800	GLYMA_02G231800	sp|B9DFS6|SNX2B_ARATH	Sorting nexin 2B GN=SNX2B	ident:393/558 pos:462/558 query:558 hit:572 align:578 bit:766.1	OK	Sorting nexin 2B	na	SNX2B_ARATH	B9DFS6	Q0WLC3; Q570X1; Q9LYQ3	SNX2B	na	Arabidopsis thaliana (Mouse-ear cress)	3702
High	Master Protein	GLYMA_08G282800	PTHR10638//PTHR10638:SF34 - COPPER AMINE OXIDASE // SUBFAMILY NOT NAMED (1 of 6)	0	20.144	4	2	4	2	766	85.4	7.05	8.86	2	0	0.675	0.804361	15.42	95.2	104.8	60.73	48.13	High	Peak Found	Peak Found	High	Peak Found	Peak Found	1		3	3	Present Both	1	GLYMA_08G282800	GLYMA_08G282800	sp|Q8H1H9|AMO_ARATH	Primary amine oxidase GN=ML2	ident:200/766 pos:301/766 query:766 hit:712 align:683 bit:252.3	Poor_match	Primary amine oxidase	Amine oxidase [copper-containing]	AMO_ARATH	Q8H1H9	Q84W14; Q9SI68	OrderedLocusNames=At1g62810	na	Arabidopsis thaliana (Mouse-ear cress)	3702
High	Master Protein	GLYMA_17G019300	PTHR10638:SF36 - AMINE OXIDASE-RELATED (1 of 4)	0	152.403	20	10	45	10	674	75.8	6.7	133.39	10	0	0.962	0.999223	51.27	94.3	105.7	33.68	24.98	High	High	High	High	High	High	1		3	3	Present Both	1	GLYMA_17G019300	GLYMA_17G019300	sp|P0DO00|AMO2_ARATH	Primary amine oxidase 2 GN=ALMT1	ident:344/674 pos:456/674 query:674 hit:662 align:664 bit:689.1	Poor_match	Primary amine oxidase 2	Amine oxidase [copper-containing] 2	AMO2_ARATH	P0DO00	Q9C6V7	OrderedLocusNames=At1g31672	na	Arabidopsis thaliana (Mouse-ear cress)	3702
High	Master Protein	GLYMA_15G072100	PTHR10639:SF7 - CLATHRIN LIGHT CHAIN (1 of 4)	0	417.279	51	29	159	5	322	35.3	5.19	513.29	29	24	1.217	0.897585	82.85	102.8	97.2	45.88	11.31	High	High	High	High	High	High	1		3	3	Present Both	1	GLYMA_15G072100	GLYMA_15G072100	sp|Q9SKU1|CLC1_ARATH	Clathrin light chain 1 GN=CKX6	ident:168/322 pos:193/322 query:322 hit:338 align:299 bit:244.6	OK	Clathrin light chain 1	na	CLC1_ARATH	Q9SKU1	Q8LG44	OrderedLocusNames=At2g20760	na	Arabidopsis thaliana (Mouse-ear cress)	3702
High	Master Protein	GLYMA_13G241300	PTHR10639:SF7 - CLATHRIN LIGHT CHAIN (1 of 4)	0	414.748	52	29	155	5	313	34.6	5.12	506.51	29	0	1.051	0.976873	58.82	119	81	67.37	44.07	High	High	High	High	High	High	1		3	3	Present Both	1	GLYMA_13G241300	GLYMA_13G241300	sp|Q9SKU1|CLC1_ARATH	Clathrin light chain 1 GN=CKX6	ident:167/313 pos:199/313 query:313 hit:338 align:302 bit:248.1	OK	Clathrin light chain 1	na	CLC1_ARATH	Q9SKU1	Q8LG44	OrderedLocusNames=At2g20760	na	Arabidopsis thaliana (Mouse-ear cress)	3702
High	Master Protein	GLYMA_07G195000	PTHR10639:SF7 - CLATHRIN LIGHT CHAIN (1 of 4)	0	358.662	51	27	138	3	310	34.1	5.35	438.7	27	11	1.726	0.437666	78.54	66.5	133.5	15.08	37.15	High	High	Not Found	High	High	High	1		2	3	Present Both	1	GLYMA_07G195000	GLYMA_07G195000	sp|Q9SKU1|CLC1_ARATH	Clathrin light chain 1 GN=CKX6	ident:161/310 pos:188/310 query:310 hit:338 align:290 bit:233.8	Poor_match	Clathrin light chain 1	na	CLC1_ARATH	Q9SKU1	Q8LG44	OrderedLocusNames=At2g20760	na	Arabidopsis thaliana (Mouse-ear cress)	3702
High	Master Protein	GLYMA_13G181500	PTHR10639:SF7 - CLATHRIN LIGHT CHAIN (1 of 4)	0	290.784	40	23	119	5	303	33.5	5.34	361.62	23	0	0.964	0.999223	37.1	136.8	63.2	67.44	74.45	High	High	Peak Found	High	High	High	1		3	3	Present Both	1	GLYMA_13G181500	GLYMA_13G181500	sp|Q9SKU1|CLC1_ARATH	Clathrin light chain 1 GN=CKX6	ident:160/303 pos:189/303 query:303 hit:338 align:301 bit:226.1	OK	Clathrin light chain 1	na	CLC1_ARATH	Q9SKU1	Q8LG44	OrderedLocusNames=At2g20760	na	Arabidopsis thaliana (Mouse-ear cress)	3702
High	Master Protein	GLYMA_05G164100.2.p	PTHR10663//PTHR10663:SF163 - GUANYL-NUCLEOTIDE EXCHANGE FACTOR // SUBFAMILY NOT NAMED (1 of 6)	0	69.213	25	8	38	7	348	39	7.27	105.76	8	0	0.742	0.880381	51.39	136.4	63.6	71.13	70.18	High	High	Peak Found	High	High	High	1		3	3	Present Both	1	GLYMA_05G164100.2.p	GLYMA_05G164100.2.p	sp|Q8L7W0|SH3P3_ARATH	SH3 domain-containing protein 3 GN=SH3P3	ident:260/348 pos:304/348 query:348 hit:351 align:351 bit:557.4	OK	SH3 domain-containing protein 3	na	SH3P3_ARATH	Q8L7W0	Q8W5A0; Q9SVW5	SH3P3	na	Arabidopsis thaliana (Mouse-ear cress)	3702
High	Master Protein	GLYMA_06G008900	PTHR10663//PTHR10663:SF163 - GUANYL-NUCLEOTIDE EXCHANGE FACTOR // SUBFAMILY NOT NAMED (1 of 6)	0	65.489	23	9	33	3	371	41.2	7.12	68.03	9	0	1.275	0.85976	24.36	81.3	118.7	19.44	0.53	High	High	Not Found	High	High	High	1		2	3	Present Both	1	GLYMA_06G008900	GLYMA_06G008900	sp|Q8VWF1|SH3P2_ARATH	SH3 domain-containing protein 2 GN=SH3P2	ident:297/371 pos:335/371 query:371 hit:368 align:371 bit:615.1	OK	SH3 domain-containing protein 2	na	SH3P2_ARATH	Q8VWF1	F4JLF5; F4JLF6; O65689	SH3P2	na	Arabidopsis thaliana (Mouse-ear cress)	3702
High	Master Protein	GLYMA_01G010300	PTHR10687:SF15 - SECRETORY CARRIER-ASSOCIATED MEMBRANE PROTEIN 4 (1 of 2)	0	37.967	20	3	12	3	269	30.5	8.18	44.29	3	0	0.824	0.943109	28.96	89	111	37.58	53.18	High	High	Peak Found	High	High	High	1		3	3	Present Both	1	GLYMA_01G010300	GLYMA_01G010300	sp|Q9C6X2|SCAM4_ARATH	Secretory carrier-associated membrane protein 4 GN=SCAMP4	ident:202/269 pos:230/269 query:269 hit:264 align:271 bit:422.2	OK	Secretory carrier-associated membrane protein 4 (Secretory carrier membrane protein 4)	na	SCAM4_ARATH	Q9C6X2	na	SCAMP4	na	Arabidopsis thaliana (Mouse-ear cress)	3702
High	Master Protein	GLYMA_07G202100	PTHR10751//PTHR10751:SF44 - GUANYLATE BINDING PROTEIN // SUBFAMILY NOT NAMED (1 of 4)	0	22.336	4	3	7	3	1060	120.1	7.49	17.36	3	0	1.054	0.976873	21.72	74.6	125.4	17.51	28.15	High	High	Peak Found	High	High	High	1		3	3	Present Both	1	GLYMA_07G202100	GLYMA_07G202100	sp|Q9SSN0|RHD31_ARATH	Protein ROOT HAIR DEFECTIVE 3 homolog 1 GN=RDL2	ident:31/1060 pos:46/1060 query:1060 hit:795 align:102 bit:35.4	Partial_match_both	Protein ROOT HAIR DEFECTIVE 3 homolog 1	Protein SEY1 homolog 2	RHD31_ARATH	Q9SSN0	na	OrderedLocusNames=At1g72960	na	Arabidopsis thaliana (Mouse-ear cress)	3702
High	Master Protein	GLYMA_08G092100	PTHR10766//PTHR10766:SF58 - TRANSMEMBRANE 9 SUPERFAMILY PROTEIN // SUBFAMILY NOT NAMED (1 of 6)	0	22.852	4	2	11	2	604	69.2	7.47	27.25	2	0	0.979	0.999223	58.38	122.3	77.7	48.36	12.65	High	High	High	High	High	High	1		3	3	Present Both	1	GLYMA_08G092100	GLYMA_08G092100	sp|Q9ZPS7|TMN3_ARATH	Transmembrane 9 superfamily member 3 GN=TMN3	ident:525/604 pos:553/604 query:604 hit:592 align:589 bit:1072.4	OK	Transmembrane 9 superfamily member 3	Endomembrane protein 9; Transmembrane nine protein 3 (AtTMN3)	TMN3_ARATH	Q9ZPS7	B9DHM0; Q56X26	TMN3	na	Arabidopsis thaliana (Mouse-ear cress)	3702
High	Master Protein	GLYMA_07G010300	PTHR10766:SF37 - ENDOMEMBRANE PROTEIN 70 FAMILY PROTEIN (1 of 5)	0	3.703	3	2	4	1	640	73.7	8.32	1.64	2	0	1.144	0.934958	9	93.3	106.7		31.87	High	Not Found	Not Found	Peak Found	High	Peak Found	1		1	3	Only Sample	1	GLYMA_07G010300	GLYMA_07G010300	sp|Q9LIC2|TMN7_ARATH	Transmembrane 9 superfamily member 7 GN=TMN7	ident:548/640 pos:588/640 query:640 hit:641 align:616 bit:1159.8	OK	Transmembrane 9 superfamily member 7	Endomembrane protein 5; Transmembrane nine protein 7 (AtTMN7)	TMN7_ARATH	Q9LIC2	Q0WPY4	TMN7	na	Arabidopsis thaliana (Mouse-ear cress)	3702
High	Master Protein	GLYMA_03G125800	PTHR10772:SF8 - 10 KDA CHAPERONIN (1 of 4)	0	15.013	29	3	12	1	97	10.6	8.4	26.71	3	2	0.625	0.684522	12.81	127.2	72.8	15.06	4.12	High	High	High	High	Peak Found	High	1		3	3	Present Both	1	GLYMA_03G125800	GLYMA_03G125800	sp|P34893|CH10_ARATH	10 kDa chaperonin, mitochondrial GN=CPN10	ident:75/97 pos:87/97 query:97 hit:98 align:97 bit:159.5	OK	10 kDa chaperonin, mitochondrial	Chaperonin 10 (CPN10); Protein groES	CH10_ARATH	P34893	Q96249	CPN10	na	Arabidopsis thaliana (Mouse-ear cress)	3702
High	Master Protein	GLYMA_19G128300	PTHR10772:SF8 - 10 KDA CHAPERONIN (1 of 4)	0	13.643	29	3	15	1	97	10.6	8.4	30.01	3	0	0.382	0.0971908	5.14	153.6	46.4	15.7	62.07	High	High	High	Peak Found	High	Peak Found	1		3	3	Present Both	1	GLYMA_19G128300	GLYMA_19G128300	sp|P34893|CH10_ARATH	10 kDa chaperonin, mitochondrial GN=CPN10	ident:74/97 pos:87/97 query:97 hit:98 align:97 bit:157.9	OK	10 kDa chaperonin, mitochondrial	Chaperonin 10 (CPN10); Protein groES	CH10_ARATH	P34893	Q96249	CPN10	na	Arabidopsis thaliana (Mouse-ear cress)	3702
High	Master Protein	GLYMA_20G017200	PTHR10772:SF9 - GROES-LIKE PROTEIN (1 of 2)	0	15.993	30	3	6	3	122	13.8	7.34	15.74	3	0	0.915	0.997622	61.24	102.6	97.4	54.14	38.06	High	High	Peak Found	High	Peak Found	High	1		3	3	Present Both	1	GLYMA_20G017200	GLYMA_20G017200	sp|P34893|CH10_ARATH	10 kDa chaperonin, mitochondrial GN=CPN10	ident:74/122 pos:87/122 query:122 hit:98 align:122 bit:146.7	OK	10 kDa chaperonin, mitochondrial	Chaperonin 10 (CPN10); Protein groES	CH10_ARATH	P34893	Q96249	CPN10	na	Arabidopsis thaliana (Mouse-ear cress)	3702
High	Master Protein	GLYMA_03G015400	PTHR10774//PTHR10774:SF58 - EXTENDED SYNAPTOTAGMIN-RELATED // SUBFAMILY NOT NAMED (1 of 10)	0	29.144	21	2	11	2	149	16.6	4.32	34.01	2	0	1.247	0.874733	22.07	89	111	73.36	23.53	High	High	High	High	High	High	1		3	3	Present Both	1	GLYMA_03G015400	GLYMA_03G015400	sp|Q9C8S6|Y1322_ARATH	C2 domain-containing protein At1g63220 GN=WOX14	ident:91/149 pos:111/149 query:149 hit:147 align:149 bit:183.3	OK	C2 domain-containing protein At1g63220	na	Y1322_ARATH	Q9C8S6	Q8LDR6	OrderedLocusNames=At1g63220	na	Arabidopsis thaliana (Mouse-ear cress)	3702
High	Master Protein	GLYMA_14G220000	PTHR10774:SF50 - SYNAPTOTAGMIN-1-RELATED (1 of 5)	0	7.818	4	2	8	2	538	61.2	6.83	18.19	2	0	0.65	0.746272	34.27	145.6	54.4	43.96	144.17	High	High	High	High	Peak Found	High	1		3	3	Present Both	1	GLYMA_14G220000	GLYMA_14G220000	sp|B6ETT4|SYT2_ARATH	Synaptotagmin-2 GN=SYT2	ident:403/538 pos:475/538 query:538 hit:537 align:537 bit:854.0	OK	Synaptotagmin-2	NTMC2T1.2; Synaptotagmin B	SYT2_ARATH	B6ETT4	Q9LNT5	SYT2	SYTB	Arabidopsis thaliana (Mouse-ear cress)	3702
High	Master Protein	GLYMA_07G040100.2.p	PTHR10795//PTHR10795:SF331 - PROPROTEIN CONVERTASE SUBTILISIN/KEXIN // SUBFAMILY NOT NAMED (1 of 2)	0	47.91	11	6	23	2	775	81.7	6.58	87.31	6	0	0.759	0.899245	24.11	86.2	113.8	61.08	20.42	High	High	High	High	High	High	1		3	3	Present Both	1	GLYMA_07G040100.2.p	GLYMA_07G040100.2.p	sp|Q9LVJ1|SBT14_ARATH	Subtilisin-like protease SBT1.4 GN=SBT1.4	ident:517/775 pos:602/775 query:775 hit:777 align:770 bit:1024.2	OK	Subtilisin-like protease SBT1.4	Subtilase subfamily 1 member 4 (AtSBT1.4)	SBT14_ARATH	Q9LVJ1	B9DHY1; Q0WWH7	SBT1.4	na	Arabidopsis thaliana (Mouse-ear cress)	3702
High	Master Protein	GLYMA_16G008900	PTHR10795//PTHR10795:SF331 - PROPROTEIN CONVERTASE SUBTILISIN/KEXIN // SUBFAMILY NOT NAMED (1 of 2)	0	36.444	6	6	16	2	1427	152.8	6.54	50.07	6	4	0.915	0.997622	33.53	103.2	96.8	18.4	16.65	High	Not Found	Not Found	High	Not Found	High	1		1	2	Only Sample	1	GLYMA_16G008900	GLYMA_16G008900	sp|Q9LVJ1|SBT14_ARATH	Subtilisin-like protease SBT1.4 GN=SBT1.4	ident:514/1427 pos:603/1427 query:1427 hit:777 align:766 bit:1031.5	Poor_match	Subtilisin-like protease SBT1.4	Subtilase subfamily 1 member 4 (AtSBT1.4)	SBT14_ARATH	Q9LVJ1	B9DHY1; Q0WWH7	SBT1.4	na	Arabidopsis thaliana (Mouse-ear cress)	3702
High	Master Protein	GLYMA_04G044600	PTHR10795//PTHR10795:SF388 - PROPROTEIN CONVERTASE SUBTILISIN/KEXIN // SUBFAMILY NOT NAMED (1 of 8)	0	68.919	12	7	17	3	770	82.3	8.54	52.39	7	0	0.626	0.686989	5.76	111.4	88.6	15.61	21.84	High	High	High	High	Peak Found	High	1		3	3	Present Both	1	GLYMA_04G044600	GLYMA_04G044600	sp|O65351|SBT17_ARATH	Subtilisin-like protease SBT1.7 GN=SBT1.7	ident:484/770 pos:580/770 query:770 hit:757 align:737 bit:994.2	OK	Subtilisin-like protease SBT1.7	Cucumisin-like serine protease; Subtilase subfamily 1 member 7 (AtSBT1.7); Subtilisin-like serine protease 1 (At-SLP1)	SBT17_ARATH	O65351	P80854; Q39007; Q8RWQ7	SBT1.7	na	Arabidopsis thaliana (Mouse-ear cress)	3702
High	Master Protein	GLYMA_02G158200	PTHR10795:SF316 - SERINE PROTEASE-LIKE PROTEIN-RELATED (1 of 3)	0	73.03	32	5	20	5	136	14.7	6.52	70.78	5	0	1.307	0.83963	85.99	34.7	165.3	138.32	69.7	High	High	High	High	High	High	1		3	3	Present Both	1	GLYMA_02G158200	GLYMA_02G158200	sp|Q8L7I2|SBT36_ARATH	Subtilisin-like protease SBT3.6 GN=SBT3.6	ident:43/136 pos:66/136 query:136 hit:778 align:113 bit:75.5	Partial_match_hit	Subtilisin-like protease SBT3.6	Subtilase subfamily 3 member 6 (AtSBT3.6)	SBT36_ARATH	Q8L7I2	A8MS13; F4JMC8; Q0WVJ9; Q9T0B5; Q9ZSB3	SBT3.6	na	Arabidopsis thaliana (Mouse-ear cress)	3702
High	Master Protein	GLYMA_06G298500	PTHR10809:SF48 - VESICLE-ASSOCIATED PROTEIN 4-1 (1 of 6)	0	5.156	8	2	4	1	271	30.5	8.91	8.78	2	0	1.158	0.923285	0	92.7	107.3			High	High	Not Found	Not Found	High	Not Found	1		2	1	Only Control	1	GLYMA_06G298500	GLYMA_06G298500	sp|Q8VYN2|VAP42_ARATH	Vesicle-associated protein 4-2 GN=PVA42	ident:195/271 pos:224/271 query:271 hit:295 align:295 bit:369.0	OK	Vesicle-associated protein 4-2	Plant VAP homolog 4-2 (AtPVA42); VAMP-associated protein 4-2	VAP42_ARATH	Q8VYN2	O65410; Q3E7Q2	PVA42	na	Arabidopsis thaliana (Mouse-ear cress)	3702
High	Master Protein	GLYMA_04G193500	PTHR10836//PTHR10836:SF44 - GLYCERALDEHYDE 3-PHOSPHATE DEHYDROGENASE // SUBFAMILY NOT NAMED (1 of 4)	0	157.686	53	15	61	2	338	36.8	7.58	168.39	15	13	1.083	0.964002	52.14	98.9	101.1	19.05	7.01	High	High	Not Found	High	High	High	1		2	3	Present Both	1	GLYMA_04G193500	GLYMA_04G193500	sp|P25858|G3PC1_ARATH	Glyceraldehyde-3-phosphate dehydrogenase GAPC1, cytosolic GN=GAPC1	ident:297/338 pos:318/338 query:338 hit:338 align:333 bit:618.2	OK	Glyceraldehyde-3-phosphate dehydrogenase GAPC1, cytosolic	NAD-dependent glyceraldehydephosphate dehydrogenase C subunit 1	G3PC1_ARATH	P25858	Q0WVE7; Q42352; Q8LAS0; Q9M8W8	GAPC1	GAPC; GAPDH	Arabidopsis thaliana (Mouse-ear cress)	3702
High	Master Protein	GLYMA_11G247600	PTHR10836:SF59 - GLYCERALDEHYDE-3-PHOSPHATE DEHYDROGENASE GAPC1, CYTOSOLIC (1 of 2)	0	152.881	59	14	62	2	340	37	7.47	169.19	14	4	1.459	0.696682	33.82	67.2	132.8	29.27	17.37	High	Peak Found	Peak Found	High	High	High	1		3	3	Present Both	1	GLYMA_11G247600	GLYMA_11G247600	sp|P25858|G3PC1_ARATH	Glyceraldehyde-3-phosphate dehydrogenase GAPC1, cytosolic GN=GAPC1	ident:304/340 pos:322/340 query:340 hit:338 align:335 bit:630.6	OK	Glyceraldehyde-3-phosphate dehydrogenase GAPC1, cytosolic	NAD-dependent glyceraldehydephosphate dehydrogenase C subunit 1	G3PC1_ARATH	P25858	Q0WVE7; Q42352; Q8LAS0; Q9M8W8	GAPC1	GAPC; GAPDH	Arabidopsis thaliana (Mouse-ear cress)	3702
High	Master Protein	GLYMA_07G253200	PTHR10869:SF64 - OXIDOREDUCTASE, 2OG-FE(II) OXYGENASE FAMILY PROTEIN-RELATED (1 of 4)	0	124.686	41	12	48	3	297	32.8	6.96	116.46	12	10	0.829	0.946309	36.4	131.5	68.5	60.72	27.45	High	High	Not Found	High	High	High	1		2	3	Present Both	1	GLYMA_07G253200	GLYMA_07G253200	sp|Q8LAN3|P4H4_ARATH	Probable prolyl 4-hydroxylase 4 GN=P4H4	ident:206/297 pos:237/297 query:297 hit:298 align:267 bit:448.7	OK	Probable prolyl 4-hydroxylase 4 (AtP4H4)	na	P4H4_ARATH	Q8LAN3	Q8RWK0	P4H4	na	Arabidopsis thaliana (Mouse-ear cress)	3702
High	Master Protein	GLYMA_17G021200	PTHR10869:SF64 - OXIDOREDUCTASE, 2OG-FE(II) OXYGENASE FAMILY PROTEIN-RELATED (1 of 4)	0	102.256	37	11	41	2	298	33	7.24	89.71	11	0	0.324	0.0310261	2.9	151.1	48.9	12.98	47.29	High	High	Not Found	High	High	Peak Found	1		2	3	Present Both	1	GLYMA_17G021200	GLYMA_17G021200	sp|Q8LAN3|P4H4_ARATH	Probable prolyl 4-hydroxylase 4 GN=P4H4	ident:215/298 pos:249/298 query:298 hit:298 align:298 bit:452.6	OK	Probable prolyl 4-hydroxylase 4 (AtP4H4)	na	P4H4_ARATH	Q8LAN3	Q8RWK0	P4H4	na	Arabidopsis thaliana (Mouse-ear cress)	3702
High	Master Protein	GLYMA_13G212700	PTHR10869:SF64 - OXIDOREDUCTASE, 2OG-FE(II) OXYGENASE FAMILY PROTEIN-RELATED (1 of 4)	0	54.1	23	7	34	1	301	33.3	5.81	60.58	7	2	1.199	0.903573	46.64	121.5	78.5	75.37	31.03	High	High	Not Found	Not Found	High	Not Found	1		2	1	Only Control	1	GLYMA_13G212700	GLYMA_13G212700	sp|Q8LAN3|P4H4_ARATH	Probable prolyl 4-hydroxylase 4 GN=P4H4	ident:212/301 pos:248/301 query:301 hit:298 align:293 bit:446.0	OK	Probable prolyl 4-hydroxylase 4 (AtP4H4)	na	P4H4_ARATH	Q8LAN3	Q8RWK0	P4H4	na	Arabidopsis thaliana (Mouse-ear cress)	3702
High	Master Protein	GLYMA_11G080700	PTHR10869:SF78 - 2-OXOGLUTARATE (2OG) AND FE(II)-DEPENDENT OXYGENASE SUPERFAMILY PROTEIN (1 of 8)	0	45.011	11	2	16	2	290	32.7	8.47	59.17	2	0	0.523	0.410368	17.19	149.3	50.7	65.06	68.48	High	High	Peak Found	High	High	High	1		3	3	Present Both	1	GLYMA_11G080700	GLYMA_11G080700	sp|F4JZ24|P4H10_ARATH	Probable prolyl 4-hydroxylase 10 GN=P4H10	ident:215/290 pos:254/290 query:290 hit:289 align:289 bit:464.9	OK	Probable prolyl 4-hydroxylase 10 (AtP4H10)	na	P4H10_ARATH	F4JZ24	Q9FKX6	P4H10	na	Arabidopsis thaliana (Mouse-ear cress)	3702
High	Master Protein	GLYMA_17G168400	PTHR10896:SF17 - BETA-1,4-XYLOSYLTRANSFERASE IRX14-RELATED (1 of 6)	0	6.37	3	1	3	1	514	57.4	9.6	3.96	1	0	0.799	0.93045	55.85	133.5	66.5	61.72	69.97	High	High	Peak Found	Peak Found	High	Not Found	1		3	2	Present Both	1	GLYMA_17G168400	GLYMA_17G168400	sp|Q9FH90|IX14H_ARATH	Probable beta-1,4-xylosyltransferase IRX14H GN=IRX14H	ident:300/514 pos:376/514 query:514 hit:492 align:518 bit:593.6	OK	Probable beta-1,4-xylosyltransferase IRX14H	Protein IRREGULAR XYLEM 14 homolog; Xylan xylosyltransferase IRX14H	IX14H_ARATH	Q9FH90	na	IRX14H	na	Arabidopsis thaliana (Mouse-ear cress)	3702
High	Master Protein	GLYMA_19G122600.4.p	PTHR10903 - GTPASE, IMAP FAMILY MEMBER-RELATED (1 of 14)	0	13.468	12	3	3	3	312	34.8	9.33	7.57	3	0	0.966	0.999223	66.62	107.4	92.6	72.66	1.77	High	Peak Found	Peak Found	Peak Found	High	High	1		3	3	Present Both	1	GLYMA_19G122600.4.p	GLYMA_19G122600.4.p	sp|Q38906|TOC34_ARATH	Translocase of chloroplast 34, chloroplastic GN=TOC34	ident:205/312 pos:254/312 query:312 hit:313 align:305 bit:443.4	OK	Translocase of chloroplast 34, chloroplastic (AtToc34)	34 kDa chloroplast outer envelope protein; GTP-binding protein OEP34; Plastid protein import 3	TOC34_ARATH	Q38906	Q0WNL4; Q8L9G5; Q9FF74; Q9GDD2	TOC34	OEP34; PPI3	Arabidopsis thaliana (Mouse-ear cress)	3702
Medium	Master Protein	GLYMA_06G140200	PTHR10992:SF743 - ALPHA/BETA-HYDROLASE DOMAIN-CONTAINING PROTEIN (1 of 2)	0.019	1.418	1	1	2	1	490	54.4	8.95	0	1	0	0.399	0.126353	2.84	142.9	57.1	23.48	16.66	High	High	Peak Found	Peak Found	Peak Found	Peak Found	1		3	3	Present Both	1	GLYMA_06G140200	GLYMA_06G140200	sp|O22975|LPAAT_ARATH	1-acylglycerol-3-phosphate O-acyltransferase GN=LOX4	ident:39/490 pos:64/490 query:490 hit:418 align:130 bit:50.4	Partial_match_both	1-acylglycerol-3-phosphate O-acyltransferase	Lipid droplet-binding protein CGI-58 homolog	LPAAT_ARATH	O22975	Q9SU43	OrderedLocusNames=At4g24160	na	Arabidopsis thaliana (Mouse-ear cress)	3702
High	Master Protein	GLYMA_03G237400	PTHR10992:SF773 - PROTEIN AUXIN RESPONSE 4 (1 of 2)	0	24.954	8	4	6	4	471	52	6.61	12.58	4	0	0.961	0.999223	22.83	121	79	18.77	55.22	High	High	Peak Found	Peak Found	High	High	1		3	3	Present Both	1	GLYMA_03G237400	GLYMA_03G237400	sp|Q9FZ33|AXR4_ARATH	Protein AUXIN RESPONSE 4 GN=AXR4	ident:241/471 pos:322/471 query:471 hit:473 align:483 bit:447.2	Poor_match	Protein AUXIN RESPONSE 4	na	AXR4_ARATH	Q9FZ33	Q944Q7	AXR4	na	Arabidopsis thaliana (Mouse-ear cress)	3702
High	Master Protein	GLYMA_08G304100.2.p	PTHR10994:SF62 - RETICULON-LIKE PROTEIN B8 (1 of 4)	0	28.697	15	2	9	1	243	27	8.29	31.38	2	0	0.534	0.444181	6.33	130.4	69.6	20.15	8.84	High	High	Peak Found	High	High	Peak Found	1		3	3	Present Both	1	GLYMA_08G304100.2.p	GLYMA_08G304100.2.p	sp|Q9SS37|RTNLH_ARATH	Reticulon-like protein B8 GN=RTNLB8	ident:142/243 pos:179/243 query:243 hit:247 align:242 bit:293.5	OK	Reticulon-like protein B8 (AtRTNLB8)	na	RTNLH_ARATH	Q9SS37	Q3EB99	RTNLB8	na	Arabidopsis thaliana (Mouse-ear cress)	3702
High	Master Protein	GLYMA_18G115300	PTHR10994:SF62 - RETICULON-LIKE PROTEIN B8 (1 of 4)	0	28.253	14	2	10	1	264	29.4	8.13	34.75	2	1	0.466	0.270654	7.99	101.7	98.3	32.43	23.42	High	High	Peak Found	High	Not Found	High	1		3	2	Present Both	1	GLYMA_18G115300	GLYMA_18G115300	sp|Q9SS37|RTNLH_ARATH	Reticulon-like protein B8 GN=RTNLB8	ident:143/264 pos:182/264 query:264 hit:247 align:263 bit:283.5	OK	Reticulon-like protein B8 (AtRTNLB8)	na	RTNLH_ARATH	Q9SS37	Q3EB99	RTNLB8	na	Arabidopsis thaliana (Mouse-ear cress)	3702
High	Master Protein	GLYMA_13G339700.2.p	PTHR11038//PTHR11038:SF17 - MITOCHONDRIAL IMPORT INNER MEMBRANE TRANSLOCASE SUBUNIT TIM10 // SUBFAMILY NOT NAMED (1 of 1)	0	24.561	46	3	10	3	84	9.7	7.05	32.41	3	0	0.711	0.849629	34.16	96	104	90.07	35.84	High	Peak Found	High	High	Peak Found	High	1		3	3	Present Both	1	GLYMA_13G339700.2.p	GLYMA_13G339700.2.p	sp|Q9ZW33|TIM10_ARATH	Mitochondrial import inner membrane translocase subunit TIM10 GN=TIM10	ident:60/84 pos:69/84 query:84 hit:83 align:84 bit:132.5	OK	Mitochondrial import inner membrane translocase subunit TIM10	na	TIM10_ARATH	Q9ZW33	na	TIM10	na	Arabidopsis thaliana (Mouse-ear cress)	3702
High	Master Protein	GLYMA_04G202200	PTHR11062:SF81 - BETA-1,4-XYLOSYLTRANSFERASE IRX10L-RELATED (1 of 3)	0	16.694	6	2	10	2	416	47.1	6.65	32.52	2	0	0.658	0.766386	7.22	119.8	80.2	10.47	4.57	High	High	Not Found	High	High	High	1		2	3	Present Both	1	GLYMA_04G202200	GLYMA_04G202200	sp|Q940Q8|IX10L_ARATH	Probable beta-1,4-xylosyltransferase IRX10L GN=IRX10L	ident:379/416 pos:392/416 query:416 hit:415 align:416 bit:791.2	OK	Probable beta-1,4-xylosyltransferase IRX10L	Glucuronoxylan glucuronosyltransferase 1 (AtGUT1); Glucuronoxylan glucuronosyltransferase 2 (AtGUT2); Protein IRREGULAR XYLEM 10-like; Xylan xylosyltransferase IRX10L	IX10L_ARATH	Q940Q8	Q8LB70; Q9FLS5; W8PUW2	IRX10L	GUT1; GUT2	Arabidopsis thaliana (Mouse-ear cress)	3702
High	Master Protein	GLYMA_18G062900	PTHR11071//PTHR11071:SF291 - PEPTIDYL-PROLYL CIS-TRANS ISOMERASE // SUBFAMILY NOT NAMED (1 of 4)	0	48.753	40	6	22	4	204	21.9	9.17	52.48	6	2	0.884	0.979949	49.47	120.7	79.3	50.39	17.02	High	High	Peak Found	High	High	High	1		3	3	Present Both	1	GLYMA_18G062900	GLYMA_18G062900	sp|Q8LDP4|CP19D_ARATH	Peptidyl-prolyl cis-trans isomerase CYP19-4 GN=CYP19-4	ident:174/204 pos:187/204 query:204 hit:201 align:204 bit:358.2	OK	Peptidyl-prolyl cis-trans isomerase CYP19-4 (PPIase CYP19-4)	Cyclophilin of 19 kDa 4; Cyclophilin-5; Rotamase CYP19-4	CP19D_ARATH	Q8LDP4	A8MS66; O22515; O80876	CYP19-4	CYP5	Arabidopsis thaliana (Mouse-ear cress)	3702
High	Master Protein	GLYMA_12G024700	PTHR11071:SF252 - PEPTIDYL-PROLYL CIS-TRANS ISOMERASE CYP18-3-RELATED (1 of 4)	0	92.155	38	5	39	3	172	18.1	7.83	118.38	5	0	1.078	0.967747	52.82	78.6	121.4	44.78	49.89	High	High	High	High	High	High	1		3	3	Present Both	1	GLYMA_12G024700	GLYMA_12G024700	sp|Q38900|CP19A_ARATH	Peptidyl-prolyl cis-trans isomerase CYP19-1 GN=CYP19-1	ident:144/172 pos:158/172 query:172 hit:173 align:170 bit:312.0	OK	Peptidyl-prolyl cis-trans isomerase CYP19-1 (PPIase CYP19-1)	Cyclophilin of 19 kDa 1; Rotamase cyclophilin-3	CP19A_ARATH	Q38900	F4IL99	CYP19-1	ROC3	Arabidopsis thaliana (Mouse-ear cress)	3702
High	Master Protein	GLYMA_11G098700	PTHR11071:SF264 - PEPTIDYL-PROLYL CIS-TRANS ISOMERASE CYP19-1 (1 of 3)	0	72.808	35	6	32	4	172	18.2	8.46	82.58	6	2	0.885	0.981895	44.62	105.5	94.5	1.4	17.69	High	High	High	High	High	High	1		3	3	Present Both	1	GLYMA_11G098700	GLYMA_11G098700	sp|Q38900|CP19A_ARATH	Peptidyl-prolyl cis-trans isomerase CYP19-1 GN=CYP19-1	ident:149/172 pos:161/172 query:172 hit:173 align:170 bit:320.9	OK	Peptidyl-prolyl cis-trans isomerase CYP19-1 (PPIase CYP19-1)	Cyclophilin of 19 kDa 1; Rotamase cyclophilin-3	CP19A_ARATH	Q38900	F4IL99	CYP19-1	ROC3	Arabidopsis thaliana (Mouse-ear cress)	3702
High	Master Protein	GLYMA_20G098400	PTHR11073//PTHR11073:SF17 - CALRETICULIN AND CALNEXIN // SUBFAMILY NOT NAMED (1 of 2)	0.001	2.313	2	1	3	1	451	52	4.64	5.5	1	0	0.965	0.999223	117.67	175	25	75.63	117.8	High	High	Peak Found	Peak Found	High	Peak Found	1		3	3	Present Both	1	GLYMA_20G098400	GLYMA_20G098400	sp|Q38858|CALR2_ARATH	Calreticulin-2 GN=CRT2	ident:301/451 pos:327/451 query:451 hit:424 align:352 bit:606.3	OK	Calreticulin-2	na	CALR2_ARATH	Q38858	O04152; O80486; Q94AW7	CRT2	CRTL	Arabidopsis thaliana (Mouse-ear cress)	3702
High	Master Protein	GLYMA_14G001200	PTHR11216:SF72 - CALCIUM-BINDING EF HAND-CONTAINING PROTEIN (1 of 5)	0	41.653	8	6	12	5	1037	113	5.26	43.48	6	0	0.698	0.834549	15.4	87.3	112.7	52.43	31.9	High	High	High	High	High	High	1		3	3	Present Both	1	GLYMA_14G001200	GLYMA_14G001200	sp|B3LF48|EHD2_ARATH	EH domain-containing protein 2 GN=EHD2	ident:34/1037 pos:53/1037 query:1037 hit:546 align:81 bit:76.6	Partial_match_both	EH domain-containing protein 2 (AtEHD2)	na	EHD2_ARATH	B3LF48	F4JGH2; Q9S9W1	EHD2	na	Arabidopsis thaliana (Mouse-ear cress)	3702
High	Master Protein	GLYMA_06G016700	PTHR11216:SF72 - CALCIUM-BINDING EF HAND-CONTAINING PROTEIN (1 of 5)	0	27.571	8	6	14	5	1076	117	5.39	24.05	6	1	0.606	0.628465	12.82	133	67	18.19	15.45	High	High	High	High	High	High	1		3	3	Present Both	1	GLYMA_06G016700	GLYMA_06G016700	sp|B3LF48|EHD2_ARATH	EH domain-containing protein 2 GN=EHD2	ident:37/1076 pos:55/1076 query:1076 hit:546 align:80 bit:82.8	Partial_match_both	EH domain-containing protein 2 (AtEHD2)	na	EHD2_ARATH	B3LF48	F4JGH2; Q9S9W1	EHD2	na	Arabidopsis thaliana (Mouse-ear cress)	3702
High	Master Protein	GLYMA_17G087500	PTHR11220 - HEME-BINDING PROTEIN-RELATED (1 of 13)	0	44.398	23	4	19	4	213	23.6	8.87	61.19	4	0	1.311	0.834549	76.1	72.1	127.9	45.17	60.61	High	High	High	High	High	High	1		3	3	Present Both	1	GLYMA_17G087500	GLYMA_17G087500	sp|Q9SR77|HBPL1_ARATH	Heme-binding-like protein At3g10130, chloroplastic GN=FLS2	ident:42/213 pos:73/213 query:213 hit:309 align:154 bit:45.1	Partial_match_hit	Heme-binding-like protein At3g10130, chloroplastic	na	HBPL1_ARATH	Q9SR77	Q8L605	OrderedLocusNames=At3g10130	na	Arabidopsis thaliana (Mouse-ear cress)	3702
[truncated: 1,050 more rows]
[truncated: 18 more columns]

## Sheet: LFQ Proteins
Control/Salt-treatment (50 mM) Root Plasma Membrane Orthologs with fold changes
			1646				Do not include column headers for copy/paste to STRING-DB input boxes
Actual				Arabidopsis			Arabidopsis
[truncated: 1,647 more rows]

## Sheet: Up-Regulated
Up-regulated in 50 mM salt treatment; significant candidates (FDR < 0.10)
[truncated: 161 more rows]

[truncated: 1 more sheets: Down-Regulated]
