# Supplementary material for: Membrane Proteomic Profiling of Soybean Leaf and Root Tissues Uncovers Salt-Stress-Responsive Membrane Proteins
Source: Int J Mol Sci. 2022 Oct 31;23(21):13270. doi: 10.3390/ijms232113270 (PMC9655375; doi:10.3390/ijms232113270)
Supplement: Supplementary file 1 [file ijms-23-13270-s001.zip › Table S4.xlsx]

## Sheet: ReadMe
Column	Header	Description
AG	Present_Control	Count of how many Control samples had quant data	Computed in Python script
AH	Present_Sample	Count of how many salt-treatment samples had quant data	Computed in Python script
AI	Missing_Status	Missing value status (present is 2/3 or 3/3; missing is 1/3 or 0/3)	Computed in Python script
AJ	Counter	Column of ones for row counting
AK	Index	Copy of Accession column (keys used in annotation script)
AL	query_acc	Accession of identified protein	Ortholog mapping
AM	hit_acc	Accession of Adabidopsis ortholog	Ortholog mapping
AN	hit_desc	Description of Adabidopsis ortholog	Ortholog mapping
AO	blast_scores	Summary of BLAST alignment	Ortholog mapping
AP	match_status	Summary of relative match status	Ortholog mapping
AQ	Primary Protein Name	Main protein name	UniProt annotations
AR	Alternative Protein Names	Any other protein names	UniProt annotations
AS	Identifier	Swiss-Prot identifier	UniProt annotations
AT	Accession	Swiss-Prot accession	UniProt annotations
AU	Other Accessions	Any other accessions	UniProt annotations
AV	UniProt Gene Name	UniProt gene symbols	UniProt annotations
AW	Other Gene Synonyms	Any other gene symbols	UniProt annotations
AX	Species Name	Species name	UniProt annotations
AY	Taxonomy Number	Taxonomy number	UniProt annotations
AZ	UniProt Link	Link to UniProt knowledgebase	UniProt annotations
BA	Key Words	UniProt keyword lists (a controlled vocabulary added by curation)	UniProt annotations
BB	KW: Biological process	Keywords separated into categories	UniProt annotations
BC	KW: Cellular component	Keywords separated into categories	UniProt annotations
BD	KW: Coding sequence diversity	Keywords separated into categories	UniProt annotations
BE	KW: Developmental stage	Keywords separated into categories	UniProt annotations
BF	KW: Disease	Keywords separated into categories	UniProt annotations
BG	KW: Domain	Keywords separated into categories	UniProt annotations
BH	KW: Ligand	Keywords separated into categories	UniProt annotations
BI	KW: Molecular function	Keywords separated into categories	UniProt annotations
BJ	KW: PTM	Keywords separated into categories	UniProt annotations
BK	KW: Technical term	Keywords separated into categories	UniProt annotations
BL	GO: Biological Process	GO terms	UniProt annotations
BM	GO: Cellular Component	GO terms	UniProt annotations
BN	GO: Molecular Function	GO terms	UniProt annotations
BO	CC Pathway	Manual curation pathway notes	UniProt annotations
BP	Reactome Pathway	Reactome pathway information	UniProt annotations
BQ	Trim	Blank column

## Sheet: Identified Proteins
Protein FDR Confidence	Master	Accession	UNIPROT	Description	Exp. q-value: Combined	Sum PEP Score	Coverage [%]	# Peptides	# PSMs	# Unique Peptides	# AAs	MW [kDa]	calc. pI	Score Sequest HT: Sequest HT	# Peptides (by Search Engine): Sequest HT	# Razor Peptides	Abundance Ratio: (Sample) / (Control)	Abundance Ratio Adj. P-Value: (Sample) / (Control)	Abundance Ratio Variability [%]: (Sample) / (Control)	Abundances (Grouped): Control	Abundances (Grouped): Sample	Abundances (Grouped) CV [%]: Control	Abundances (Grouped) CV [%]: Sample	Control Root Replicate 1	Control Root Replicate 2	Control Root Replicate 3	100 mm Root Replicate1	100 mm Root Rep2	100 mm Root Replicate 3	# Protein Groups	Modifications	Present_Control	Present_Sample	Missing_Status	Counter	Index	query_acc	hit_acc	hit_desc	blast_scores	match_status	Primary Protein Name	Alternative Protein Names	Identifier	Accession	Other Accessions	UniProt Gene Name	Other Gene Synonyms	Species Name
High	Master Protein	GLYMA_01G010600			0	23.887	50	6	15	6	138	15.9	9.55	22.49	6	0	0.984	0.996833	71.26	100.9	99.1	45.01	55.18	High	Peak Found	High	High	High	Peak Found	1		3	3	Present Both	1	GLYMA_01G010600	GLYMA_01G010600	sp|Q9SSE8|GLYT1_ARATH	Probable glycosyltransferase At3g07620 GN=GLU2	ident:10/138 pos:25/138 query:138 hit:470 align:47 bit:28.9	Partial_match_both	Probable glycosyltransferase At3g07620	na	GLYT1_ARATH	Q9SSE8	na	OrderedLocusNames=At3g07620	na	Arabidopsis thaliana (Mouse-ear cress)
High	Master Protein	GLYMA_01G234200			0	145.173	43	13	91	13	157	17.3	9.54	295.3	13	0	1.246	0.970114	58.02	69	131	48.52	9.29	High	High	High	High	High	High	1		3	3	Present Both	1	GLYMA_01G234200	GLYMA_01G234200	sp|Q8L840|RQL4A_ARATH	ATP-dependent DNA helicase Q-like 4A GN=RECQL4A	ident:34/157 pos:43/157 query:157 hit:1188 align:101 bit:28.1	Partial_match_hit	ATP-dependent DNA helicase Q-like 4A	RecQ-like protein 4A (AtRecQ4A; AtRecQl4A); SGS1-like protein (AtSGS1)	RQL4A_ARATH	Q8L840	O04092; Q9FT71	RECQL4A	RECQ4A; RQL4A; SGS1	Arabidopsis thaliana (Mouse-ear cress)
High	Master Protein	GLYMA_03G080200			0	44.687	32	6	22	6	197	20.9	4.86	55.94	6	0	0.698	0.946051	40.46	121.1	78.9	18.33	46.65	High	High	High	High	High	High	1		3	3	Present Both	1	GLYMA_03G080200	GLYMA_03G080200	sp|Q8LDV3|Y4320_ARATH	Uncharacterized protein At4g13200, chloroplastic GN=CBSCBSPB1	ident:61/197 pos:74/197 query:197 hit:185 align:96 bit:125.6	Partial_match_both	Uncharacterized protein At4g13200, chloroplastic	na	Y4320_ARATH	Q8LDV3	Q9SVQ7	OrderedLocusNames=At4g13200	na	Arabidopsis thaliana (Mouse-ear cress)
High	Master Protein	GLYMA_04G223400			0	29.16	40	4	32	2	52	5.8	9.7	91.82	4	2	0.972	0.996833	45.92	94.8	105.2	56.77	21.06	High	High	High	High	High	High	1		3	3	Present Both	1	GLYMA_04G223400	GLYMA_04G223400	sp|P54144|AMT11_ARATH	Ammonium transporter 1 member 1 GN=AMT1-1	ident:11/52 pos:14/52 query:52 hit:501 align:25 bit:25.8	Partial_match_both	Ammonium transporter 1 member 1 (AtAMT1;1)	na	AMT11_ARATH	P54144	Q94C23	AMT1-1	na	Arabidopsis thaliana (Mouse-ear cress)
High	Master Protein	GLYMA_04G230700			0	77.988	69	3	38	3	72	8.2	7.52	157.61	3	0	1.213	0.977957	70.26	68.3	131.7	53.12	14.26	High	High	High	High	High	High	1		3	3	Present Both	1	GLYMA_04G230700	GLYMA_04G230700	sp|Q9C9I8|ERF20_ARATH	Ethylene-responsive transcription factor ERF020 GN=ERF020	ident:16/72 pos:21/72 query:72 hit:143 align:40 bit:28.1	Partial_match_hit	Ethylene-responsive transcription factor ERF020	na	ERF20_ARATH	Q9C9I8	na	ERF020	na	Arabidopsis thaliana (Mouse-ear cress)
High	Master Protein	GLYMA_05G020300			0	61.469	72	4	40	4	54	6.1	5.11	141.8	4	0	1.145	0.996833	30.4	93.1	106.9	6.78	7.64	High	High	High	High	High	High	1		3	3	Present Both	1	GLYMA_05G020300	GLYMA_05G020300	sp|Q9SD80|TOM5_ARATH	Mitochondrial import receptor subunit TOM5 homolog GN=TOM5	ident:28/54 pos:44/54 query:54 hit:54 align:54 bit:70.1	Poor_match	Mitochondrial import receptor subunit TOM5 homolog	Translocase of outer membrane 5 kDa subunit homolog	TOM5_ARATH	Q9SD80	P83431	TOM5	na	Arabidopsis thaliana (Mouse-ear cress)
High	Master Protein	GLYMA_05G058000			0	12.544	19	3	9	3	125	13.5	7.97	16.97	3	0	0.735	0.970114	34.83	85	115	51.93	22.31	High	Peak Found	High	High	High	High	1		3	3	Present Both	1	GLYMA_05G058000	GLYMA_05G058000	sp|Q9FGK0|NDUB8_ARATH	NADH dehydrogenase [ubiquinone] 1 beta subcomplex subunit 8, mitochondrial GN=NDC80	ident:105/125 pos:113/125 query:125 hit:125 align:125 bit:198.4	OK	NADH dehydrogenase [ubiquinone] 1 beta subcomplex subunit 8, mitochondrial	na	NDUB8_ARATH	Q9FGK0	na	OrderedLocusNames=At5g47570	na	Arabidopsis thaliana (Mouse-ear cress)
High	Master Protein	GLYMA_06G015300			0	63.757	59	10	32	10	167	19.5	9.64	87.07	10	0	1.108	0.996833	48.75	92.4	107.6	23.73	30.05	High	High	High	High	High	High	1		3	3	Present Both	1	GLYMA_06G015300	GLYMA_06G015300	sp|Q9FPG2|OP21B_ARATH	Outer envelope pore protein 21B, chloroplastic GN=OEP21B	ident:97/167 pos:131/167 query:167 hit:167 align:167 bit:226.5	OK	Outer envelope pore protein 21B, chloroplastic	Chloroplastic outer envelope pore protein of 21 kDa B	OP21B_ARATH	Q9FPG2	F4I2D6	OEP21B	na	Arabidopsis thaliana (Mouse-ear cress)
High	Master Protein	GLYMA_06G124600			0	19.919	29	4	12	4	189	20.8	6.8	33.61	4	0	0.752	0.978376	36.49	115	85	9.11	6.21	High	High	High	High	High	High	1		3	3	Present Both	1	GLYMA_06G124600	GLYMA_06G124600	sp|Q9FXK3|FBK11_ARATH	F-box/kelch-repeat protein At1g24881 GN=FBL25	ident:13/189 pos:14/189 query:189 hit:433 align:27 bit:27.7	Partial_match_both	F-box/kelch-repeat protein At1g24881	na	FBK11_ARATH	P0DI03	Q0WR04; Q56X62; Q56XG9; Q7GAV1; Q8GRJ5; Q8RXU7; Q9FE36; Q9FXK3; Q9FXK7	OrderedLocusNames=At1g24881	na	Arabidopsis thaliana (Mouse-ear cress)
High	Master Protein	GLYMA_06G141900			0	35.117	40	4	34	2	52	5.8	9.7	104.3	4	0	1.034	0.996833	42.1	104.5	95.5	40.48	26.12	High	High	High	High	High	High	1		3	3	Present Both	1	GLYMA_06G141900	GLYMA_06G141900	sp|Q9SYK4|IP5PD_ARATH	Type I inositol polyphosphate 5-phosphatase 13 GN=IP5P13	ident:11/52 pos:18/52 query:52 hit:1136 align:32 bit:24.6	Partial_match_hit	Type I inositol polyphosphate 5-phosphatase 13 (At5PTase13)	na	IP5PD_ARATH	Q9SYK4	F4IAA0; Q712D7	IP5P13	na	Arabidopsis thaliana (Mouse-ear cress)
High	Master Protein	GLYMA_07G009200			0	105.857	67	3	39	3	66	6.2	10.3	242.37	3	0	0.919	0.996833	63.51	121.9	78.1	24.73	72.37	High	High	High	High	High	High	1		3	3	Present Both	1	GLYMA_07G009200	GLYMA_07G009200	sp|Q9SAJ5|PP133_ARATH	Pentatricopeptide repeat-containing protein At1g79540 GN=PCMP-E65	ident:10/66 pos:16/66 query:66 hit:780 align:26 bit:25.4	Partial_match_both	Pentatricopeptide repeat-containing protein At1g79540	na	PP133_ARATH	Q9SAJ5	na	OrderedLocusNames=At1g79540	na	Arabidopsis thaliana (Mouse-ear cress)
High	Master Protein	GLYMA_07G059400			0	25.975	35	1	7	1	75	8.5	6.54	30.5	1	0	1.81	0.563598	75.08	71.2	128.8	75.26	32.09	High	High	Peak Found	High	Peak Found	High	1		3	3	Present Both	1	GLYMA_07G059400	GLYMA_07G059400	sp|Q9FF75|SUN1_ARATH	SUN domain-containing protein 1 GN=SUN1	ident:18/75 pos:29/75 query:75 hit:471 align:56 bit:27.7	Partial_match_hit	SUN domain-containing protein 1 (AtSUN1)	na	SUN1_ARATH	Q9FF75	na	SUN1	na	Arabidopsis thaliana (Mouse-ear cress)
High	Master Protein	GLYMA_07G088700			0	10.122	33	2	5	2	84	10.2	9.44	13.01	2	0	1.437	0.862691	34.12	82.1	117.9	18.97	25.64	High	High	Peak Found	High	Peak Found	High	1		3	3	Present Both	1	GLYMA_07G088700	GLYMA_07G088700	sp|Q9SEV0|BAN_ARATH	Anthocyanidin reductase GN=BAN	ident:21/84 pos:33/84 query:84 hit:340 align:67 bit:28.9	Partial_match_hit	Anthocyanidin reductase (AtANR)	Anthocyanin spotted testa (ast); Protein BANYULS	BAN_ARATH	Q9SEV0	Q1PFH9; Q680A7; Q9SYA8	BAN	ANR	Arabidopsis thaliana (Mouse-ear cress)
High	Master Protein	GLYMA_07G147100			0	13.631	33	2	10	2	142	15.3	6.8	33.46	2	0	0.921	0.996833	13.03	104.1	95.9	3.03	21.1	High	High	High	High	High	High	1		3	3	Present Both	1	GLYMA_07G147100	GLYMA_07G147100	sp|Q07356|PDS_ARATH	15-cis-phytoene desaturase, chloroplastic/chromoplastic GN=PDS	ident:26/142 pos:42/142 query:142 hit:566 align:97 bit:30.8	Partial_match_hit	15-cis-phytoene desaturase, chloroplastic/chromoplastic	Phytoene dehydrogenase; Phytoene desaturase	PDS_ARATH	Q07356	F4JUN0	PDS	na	Arabidopsis thaliana (Mouse-ear cress)
High	Master Protein	GLYMA_08G130200			0	64.823	59	6	36	6	64	7.6	8.54	152.45	6	0	1.29	0.950125	38.87	80.2	119.8	25.8	23.56	High	High	High	High	High	High	1		3	3	Present Both	1	GLYMA_08G130200	GLYMA_08G130200	sp|Q9XIF4|TRXH7_ARATH	Thioredoxin H7 GN=TRX7	ident:12/64 pos:23/64 query:64 hit:129 align:37 bit:26.6	Partial_match_hit	Thioredoxin H7 (AtTrxh7)	na	TRXH7_ARATH	Q9XIF4	na	TRX7	na	Arabidopsis thaliana (Mouse-ear cress)
High	Master Protein	GLYMA_09G059600			0	62.994	40	7	33	4	89	10.5	9.35	85.74	7	3	1.23	0.970114	81.93	91.7	108.3	34.36	20.69	High	High	High	High	High	High	1		3	3	Present Both	1	GLYMA_09G059600	GLYMA_09G059600	sp|Q9FXH5|PUP14_ARATH	Purine permease 14 GN=PUP14	ident:15/89 pos:21/89 query:89 hit:393 align:36 bit:28.5	Partial_match_both	Purine permease 14 (AtPUP14)	na	PUP14_ARATH	Q9FXH5	na	PUP14	na	Arabidopsis thaliana (Mouse-ear cress)
High	Master Protein	GLYMA_09G154800			0	35.47	23	3	16	3	133	13.7	8.81	65.18	3	0	0.36	0.171977	5.24	176.1	23.9	46.4	111.51	High	High	High	High	High	High	1		3	3	Present Both	1	GLYMA_09G154800	GLYMA_09G154800	sp|P42735|CDI8_ARATH	Cadmium-induced protein AS8 GN=APC6	ident:33/133 pos:51/133 query:133 hit:171 align:115 bit:33.1	Poor_match	Cadmium-induced protein AS8	na	CDI8_ARATH	P42735	na	OrderedLocusNames=At4g19070	na	Arabidopsis thaliana (Mouse-ear cress)
High	Master Protein	GLYMA_10G277900			0	75.036	22	5	32	3	85	9.7	9.79	118.17	5	1	1.03	0.996833	76.61	133.5	66.5	23.65	83.69	High	High	High	High	High	High	1		3	3	Present Both	1	GLYMA_10G277900	GLYMA_10G277900	sp|Q9ZUX4|UMP2_ARATH	Uncharacterized protein At2g27730, mitochondrial GN=UKL2	ident:22/85 pos:30/85 query:85 hit:113 align:38 bit:41.2	Partial_match_both	Uncharacterized protein At2g27730, mitochondrial	na	UMP2_ARATH	Q9ZUX4	Q8LBD1	OrderedLocusNames=At2g27730	na	Arabidopsis thaliana (Mouse-ear cress)
High	Master Protein	GLYMA_10G292100			0	41.283	7	4	9	4	684	77.2	5.06	35.67	4	0	0.92	0.996833	46.73	161	39	67.06	117.61	High	High	Peak Found	Peak Found	Peak Found	High	1		3	3	Present Both	1	GLYMA_10G292100	GLYMA_10G292100	sp|Q93ZJ9|MLN51_ARATH	Protein MLN51 homolog GN=MLN51	ident:20/684 pos:27/684 query:684 hit:605 align:63 bit:31.6	Partial_match_both	Protein MLN51 homolog	Protein CASC3 homolog; Protein barentsz (Btz)	MLN51_ARATH	Q93ZJ9	Q9S770	MLN51	na	Arabidopsis thaliana (Mouse-ear cress)
High	Master Protein	GLYMA_11G026500			0	16.605	31	3	8	3	124	14.4	9.88	20.69	3	0	0.863	0.996833	43.19	116.6	83.4	31.02	15.25	High	High	Peak Found	High	High	High	1		3	3	Present Both	1	GLYMA_11G026500	GLYMA_11G026500	sp|Q9SI37|WRKY1_ARATH	WRKY transcription factor 1 GN=WRKY1	ident:18/124 pos:28/124 query:124 hit:487 align:52 bit:27.3	Partial_match_both	WRKY transcription factor 1	Transcription factor ZAP1; WRKY DNA-binding protein 1; Zinc-dependent activator protein 1	WRKY1_ARATH	Q9SI37	Q058Q1; Q43388	WRKY1	na	Arabidopsis thaliana (Mouse-ear cress)
High	Master Protein	GLYMA_11G122300			0	17.007	37	2	4	2	54	6.2	9.61	6.27	2	0	0.01	1.31e-16		200		130.94		High	Peak Found	Not Found	High	High	Not Found	1		2	2	Present Both	1	GLYMA_11G122300	GLYMA_11G122300	sp|Q9XIA7|TOM6_ARATH	Mitochondrial import receptor subunit TOM6 homolog GN=TOM6	ident:36/54 pos:45/54 query:54 hit:54 align:54 bit:86.3	OK	Mitochondrial import receptor subunit TOM6 homolog	Translocase of outer membrane 6 kDa subunit homolog	TOM6_ARATH	Q9XIA7	P83432	TOM6	na	Arabidopsis thaliana (Mouse-ear cress)
High	Master Protein	GLYMA_11G182300			0	137.144	57	7	71	2	115	12.3	9.61	319.41	7	0	0.827	0.996833	33.44	99.9	100.1	90.26	32.53	High	High	High	High	High	High	1		3	3	Present Both	1	GLYMA_11G182300	GLYMA_11G182300	sp|Q9ZUX4|UMP2_ARATH	Uncharacterized protein At2g27730, mitochondrial GN=UKL2	ident:67/115 pos:82/115 query:115 hit:113 align:119 bit:92.4	OK	Uncharacterized protein At2g27730, mitochondrial	na	UMP2_ARATH	Q9ZUX4	Q8LBD1	OrderedLocusNames=At2g27730	na	Arabidopsis thaliana (Mouse-ear cress)
High	Master Protein	GLYMA_12G066300			0	53.788	63	6	29	2	67	7.8	10.61	88.84	6	4	1.678	0.677962	79.69	69.4	130.6	24.79	3.86	High	High	High	High	High	High	1		3	3	Present Both	1	GLYMA_12G066300	GLYMA_12G066300	sp|Q8W037|NIP21_ARATH	Aquaporin NIP2-1 GN=NIP2-1	ident:18/67 pos:28/67 query:67 hit:288 align:49 bit:30.4	Partial_match_hit	Aquaporin NIP2-1	NOD26-like intrinsic protein 2-1 (AtNIP2;1); Nodulin-26-like major intrinsic protein 4 (NodLikeMip4; Protein NLM4)	NIP21_ARATH	Q8W037	O64706; Q1ECK8	NIP2-1	NLM4	Arabidopsis thaliana (Mouse-ear cress)
High	Master Protein	GLYMA_12G090500			0	143.015	65	9	57	4	115	12.2	9.61	264.24	9	5	1.038	0.996833	73.27	91.4	108.6	16.66	19.68	High	High	High	High	High	High	1		3	3	Present Both	1	GLYMA_12G090500	GLYMA_12G090500	sp|Q9ZUX4|UMP2_ARATH	Uncharacterized protein At2g27730, mitochondrial GN=UKL2	ident:63/115 pos:80/115 query:115 hit:113 align:116 bit:91.3	OK	Uncharacterized protein At2g27730, mitochondrial	na	UMP2_ARATH	Q9ZUX4	Q8LBD1	OrderedLocusNames=At2g27730	na	Arabidopsis thaliana (Mouse-ear cress)
High	Master Protein	GLYMA_13G259900			0	29.43	22	2	11	2	153	16.4	10.08	38.86	2	0	0.451	0.419252	11.34	149.1	50.9	20.17	81.34	High	High	High	High	High	High	1		3	3	Present Both	1	GLYMA_13G259900	GLYMA_13G259900	sp|Q8H960|TOM2B_ARATH	Tobamovirus multiplication protein 2B GN=TOM2B	ident:70/153 pos:78/153 query:153 hit:122 align:101 bit:129.4	Poor_match	Tobamovirus multiplication protein 2B (AtTOM2B)	na	TOM2B_ARATH	Q8H960	F4ICP0; Q682B7; Q8L9F1	TOM2B	TTM1	Arabidopsis thaliana (Mouse-ear cress)
High	Master Protein	GLYMA_13G350800			0	29.382	16	5	15	5	329	37.3	8.97	28.86	5	0	1.083	0.996833	69.12	96.6	103.4	35.59	51.17	High	High	High	High	High	High	1		3	3	Present Both	1	GLYMA_13G350800	GLYMA_13G350800	sp|Q9C717|FLXL3_ARATH	Protein FLX-like 3 GN=FLXL3	ident:147/329 pos:198/329 query:329 hit:283 align:289 bit:251.1	Poor_match	Protein FLX-like 3 (AtFLXL3)	na	FLXL3_ARATH	Q9C717	Q9C887	FLXL3	FLL3	Arabidopsis thaliana (Mouse-ear cress)
High	Master Protein	GLYMA_15G041300			0	23.068	44	4	9	4	55	6.6	10.37	21.45	4	0	1.59	0.749764	35.82	111	89	10.29	9.79	High	High	Not Found	Peak Found	High	High	1		2	3	Present Both	1	GLYMA_15G041300	GLYMA_15G041300	sp|Q9ZWA9|CRU4_ARATH	12S seed storage protein CRD GN=CRD	ident:11/55 pos:15/55 query:55 hit:451 align:20 bit:25.8	Partial_match_both	12S seed storage protein CRD beta chain	Cruciferin D; Legumin-type globulin storage protein CRD; 12S seed storage protein CRD acidic chain; 12S seed storage protein CRD basic chain	CRU4_ARATH	Q9ZWA9	Q67ZY3	CRD	CRU2	Arabidopsis thaliana (Mouse-ear cress)
High	Master Protein	GLYMA_15G147300			0	35.488	38	8	29	8	198	22.3	5.73	59.91	8	0	0.826	0.996833	26.46	105.1	94.9	15.25	24.68	High	High	High	High	High	High	1		3	3	Present Both	1	GLYMA_15G147300	GLYMA_15G147300	sp|Q4PT37|NEAP3_ARATH	Nuclear envelope-associated protein 3 GN=NEAP3	ident:31/198 pos:48/198 query:198 hit:336 align:86 bit:35.4	Partial_match_both	Nuclear envelope-associated protein 3 (AtNEAP3)	na	NEAP3_ARATH	Q4PT37	O80530	NEAP3	na	Arabidopsis thaliana (Mouse-ear cress)
High	Master Protein	GLYMA_15G165900			0	52.45	40	7	29	4	89	10.6	9.35	68.23	7	0	0.822	0.996833	42.71	125.6	74.4	43.22	85.84	High	High	High	High	High	High	1		3	3	Present Both	1	GLYMA_15G165900	GLYMA_15G165900	sp|Q9FXH5|PUP14_ARATH	Purine permease 14 GN=PUP14	ident:15/89 pos:21/89 query:89 hit:393 align:36 bit:28.5	Partial_match_both	Purine permease 14 (AtPUP14)	na	PUP14_ARATH	Q9FXH5	na	PUP14	na	Arabidopsis thaliana (Mouse-ear cress)
High	Master Protein	GLYMA_17G079700			0	135.024	68	9	73	9	126	14.4	9.35	310	9	0	1.132	0.996833	61.79	88.2	111.8	35.96	5.34	High	High	High	High	High	High	1		3	3	Present Both	1	GLYMA_17G079700	GLYMA_17G079700	sp|Q9C7I1|ATL34_ARATH	RING-H2 finger protein ATL34 GN=ATL34	ident:19/126 pos:31/126 query:126 hit:327 align:71 bit:28.9	Partial_match_hit	RING-H2 finger protein ATL34	RING-type E3 ubiquitin transferase ATL34	ATL34_ARATH	Q9C7I1	na	ATL34	na	Arabidopsis thaliana (Mouse-ear cress)
High	Master Protein	GLYMA_17G143000			0	10.485	36	2	10	2	94	10.8	10.15	32.05	2	0	1.248	0.970114	34.99	102.4	97.6	17.07	18.92	High	High	High	High	High	High	1		3	3	Present Both	1	GLYMA_17G143000	GLYMA_17G143000	sp|Q4PT23|WTR6_ARATH	WAT1-related protein At1g25270 GN=WRKY68	ident:17/94 pos:27/94 query:94 hit:355 align:46 bit:26.2	Partial_match_both	WAT1-related protein At1g25270	na	WTR6_ARATH	Q4PT23	Q9FRH6	OrderedLocusNames=At1g25270	na	Arabidopsis thaliana (Mouse-ear cress)
High	Master Protein	GLYMA_20G025000			0	96.306	49	11	60	5	230	25.6	9.83	179.17	11	5	1.285	0.953816	48.57	72.4	127.6	31.74	16.1	High	High	High	High	High	High	1		3	3	Present Both	1	GLYMA_20G025000	GLYMA_20G025000	sp|Q84K90|RHIP1_ARATH	RGS1-HXK1-interacting protein 1 GN=RHIP1	ident:114/230 pos:167/230 query:230 hit:263 align:203 bit:235.7	Poor_match	RGS1-HXK1-interacting protein 1	na	RHIP1_ARATH	Q84K90	O65593	RHIP1	na	Arabidopsis thaliana (Mouse-ear cress)
High	Master Protein	GLYMA_20G110900			0	40.121	22	4	17	2	88	10	9.7	41.99	4	0	0.47	0.483049	10.95	152.3	47.7	24.33	99.78	High	High	High	High	High	High	1		3	3	Present Both	1	GLYMA_20G110900	GLYMA_20G110900	sp|Q9ZUX4|UMP2_ARATH	Uncharacterized protein At2g27730, mitochondrial GN=UKL2	ident:19/88 pos:27/88 query:88 hit:113 align:32 bit:38.9	Partial_match_both	Uncharacterized protein At2g27730, mitochondrial	na	UMP2_ARATH	Q9ZUX4	Q8LBD1	OrderedLocusNames=At2g27730	na	Arabidopsis thaliana (Mouse-ear cress)
Medium	Master Protein	GLYMA_02G291800			0.013	1.634	4	1	4	1	351	38.7	8.69	9.4	1	0	0.434	0.378069	16.48	139.5	60.5	73.89	34	High	High	Peak Found	Peak Found	High	High	1		3	3	Present Both	1	GLYMA_02G291800	GLYMA_02G291800	sp|O49286|SKP2B_ARATH	F-box protein SKP2B GN=SKP2B	ident:30/351 pos:51/351 query:351 hit:360 align:101 bit:42.7	Partial_match_both	F-box protein SKP2B	F-box/LRR-repeat protein 5 (AtFB5); SKP2-like protein 2 (AtSKP2;2)	SKP2B_ARATH	O49286	Q680E2; Q8GY48	SKP2B	FBL5	Arabidopsis thaliana (Mouse-ear cress)
High	Master Protein	GLYMA_10G058100		1.1.1.41 - Isocitrate dehydrogenase (NAD(+)) / Nicotinamide adenine dinucleotide isocitrate dehydrogenase (1 of 6)	0	53.5	23	7	22	7	359	39.4	7.49	61	7	0	0.755	0.983377	35.39	125.8	74.2	19.47	19.97	High	High	High	High	High	High	1		3	3	Present Both	1	GLYMA_10G058100	GLYMA_10G058100	sp|Q945K7|IDH5_ARATH	Isocitrate dehydrogenase [NAD] catalytic subunit 5, mitochondrial GN=IDH5	ident:318/359 pos:335/359 query:359 hit:374 align:373 bit:646.4	OK	Isocitrate dehydrogenase [NAD] catalytic subunit 5, mitochondrial	IDH-V; Isocitric dehydrogenase 5; NAD(+)-specific ICDH 5	IDH5_ARATH	Q945K7	Q9LZG1	IDH5	na	Arabidopsis thaliana (Mouse-ear cress)
High	Master Protein	GLYMA_10G261400		1.1.1.95 - Phosphoglycerate dehydrogenase / Phosphoglyceric acid dehydrogenase (1 of 5)	0	54.02	16	6	20	2	594	62.6	6.76	53.92	6	4	0.792	0.996833	29.79	126.8	73.2	36.09	45.86	High	High	High	High	High	High	1		3	3	Present Both	1	GLYMA_10G261400	GLYMA_10G261400	sp|O49485|SERA1_ARATH	D-3-phosphoglycerate dehydrogenase 1, chloroplastic GN=PGDH1	ident:483/594 pos:539/594 query:594 hit:603 align:584 bit:972.6	OK	D-3-phosphoglycerate dehydrogenase 1, chloroplastic	Protein EMBRYO SAC DEVELOPMENT ARREST 9	SERA1_ARATH	O49485	Q8LGJ6	PGDH1	EDA9	Arabidopsis thaliana (Mouse-ear cress)
High	Master Protein	GLYMA_20G129400		1.1.1.95 - Phosphoglycerate dehydrogenase / Phosphoglyceric acid dehydrogenase (1 of 5)	0	42.336	14	5	13	1	595	62.8	6.58	35.65	5	0	0.307	0.0760516	0.54	153.1	46.9	5.52		High	High	Not Found	Not Found	Not Found	Peak Found	1		2	1	Only Control	1	GLYMA_20G129400	GLYMA_20G129400	sp|O49485|SERA1_ARATH	D-3-phosphoglycerate dehydrogenase 1, chloroplastic GN=PGDH1	ident:481/595 pos:540/595 query:595 hit:603 align:584 bit:974.9	OK	D-3-phosphoglycerate dehydrogenase 1, chloroplastic	Protein EMBRYO SAC DEVELOPMENT ARREST 9	SERA1_ARATH	O49485	Q8LGJ6	PGDH1	EDA9	Arabidopsis thaliana (Mouse-ear cress)
High	Master Protein	GLYMA_07G034800		1.13.11.12//1.13.11.58 - Linoleate 13S-lipoxygenase / Lipoxidase // Linoleate 9S-lipoxygenase / Linoleate 9-lipoxygenase (1 of 3)	0	111.638	16	11	48	7	865	96.3	7.02	145.16	11	1	1.28	0.954793	65.13	81.3	118.7	40.86	16.27	High	High	High	High	High	High	1		3	3	Present Both	1	GLYMA_07G034800	GLYMA_07G034800	sp|Q06327|LOX1_ARATH	Linoleate 9S-lipoxygenase 1 GN=LOX1	ident:500/865 pos:638/865 query:865 hit:859 align:886 bit:1008.4	OK	Linoleate 9S-lipoxygenase 1	Lipoxygenase 1 (AtLOX1)	LOX1_ARATH	Q06327	Q9FZ30	LOX1	na	Arabidopsis thaliana (Mouse-ear cress)
High	Master Protein	GLYMA_07G006700		1.13.11.58 - Linoleate 9S-lipoxygenase / Linoleate 9-lipoxygenase (1 of 35)	0	48.924	13	7	48	1	570	63.9	6.37	123.84	7	0	0.235	0.013135	4.91	175.3	24.7	49.28	99.97	High	High	Peak Found	Not Found	Peak Found	Peak Found	1		3	2	Present Both	1	GLYMA_07G006700	GLYMA_07G006700	sp|Q06327|LOX1_ARATH	Linoleate 9S-lipoxygenase 1 GN=LOX1	ident:302/570 pos:392/570 query:570 hit:859 align:571 bit:590.1	OK	Linoleate 9S-lipoxygenase 1	Lipoxygenase 1 (AtLOX1)	LOX1_ARATH	Q06327	Q9FZ30	LOX1	na	Arabidopsis thaliana (Mouse-ear cress)
High	Master Protein	GLYMA_02G251100		1.2.1.41//2.7.2.11//PROLINE-MULTI - Glutamate-5-semialdehyde dehydrogenase / Glutamyl-gamma-semialdehyde dehydrogenase // Glutamate 5-kinase / Gamma-glutamyl kinase (1 of 4)	0	16.812	4	2	5	1	713	77.5	6.84	17.14	2	0	0.576	0.756854	6.23	126.9	73.1	17.77		High	High	Not Found	Not Found	Not Found	High	1		2	1	Only Control	1	GLYMA_02G251100	GLYMA_02G251100	sp|P54888|P5CS2_ARATH	Delta-1-pyrroline-5-carboxylate synthase B GN=P5CSB	ident:556/713 pos:650/713 query:713 hit:726 align:709 bit:1135.9	OK	Gamma-glutamyl phosphate reductase	Gamma-glutamyl kinase (GPR); Glutamate-5-semialdehyde dehydrogenase; Glutamyl-gamma-semialdehyde dehydrogenase	P5CS2_ARATH	P54888	Q9M061	P5CSB	P5CS2	Arabidopsis thaliana (Mouse-ear cress)
High	Master Protein	GLYMA_08G004800		1.2.1.76 - Succinate-semialdehyde dehydrogenase (acetylating) / Succinyl-CoA reductase (1 of 2)	0	43.428	15	5	11	5	427	45.4	7.99	37.48	5	0	1.025	0.996833	66.44	169.6	30.4	72.05	129.77	High	High	High	High	High	High	1		3	3	Present Both	1	GLYMA_08G004800	GLYMA_08G004800	sp|Q9CAZ2|ADH1_ARATH	Alcohol dehydrogenase class-P GN=ADH1	ident:121/427 pos:187/427 query:427 hit:379 align:379 bit:164.9	Poor_match	Alcohol dehydrogenase class-P (AtADH)	na	ADH1_ARATH	P06525	O04080; O04713; O04717; O04868; O23821; Q8LA61; Q94AY6; Q9CAZ2; Q9CAZ3; Q9SX08	ADH1	na	Arabidopsis thaliana (Mouse-ear cress)
High	Master Protein	GLYMA_11G103500		1.3.1.72 - Delta(24)-sterol reductase / Lanosterol Delta(24)-reductase (1 of 2)	0	120.35	27	12	84	3	567	66	8.21	247.55	12	10	1.055	0.996833	63.36	81.6	118.4	44.46	31.13	High	High	High	High	High	High	1		3	3	Present Both	1	GLYMA_11G103500	GLYMA_11G103500	sp|Q39085|DIM_ARATH	Delta(24)-sterol reductase GN=DIM	ident:475/567 pos:510/567 query:567 hit:561 align:564 bit:992.6	OK	Delta(24)-sterol reductase	Cell elongation protein DIMINUTO; Cell elongation protein Dwarf1; Protein CABBAGE1; Protein ENHANCED VERY-LOW-FLUENCE RESPONSE 1	DIM_ARATH	Q39085	Q0WWL4; Q38808; Q8RXF4	DIM	CBB1; DWF1; EVE1	Arabidopsis thaliana (Mouse-ear cress)
High	Master Protein	GLYMA_12G028300		1.3.1.72 - Delta(24)-sterol reductase / Lanosterol Delta(24)-reductase (1 of 2)	0	116.25	22	11	81	2	567	66	8.22	233.54	11	0	1.316	0.945815	6.81	86.4	113.6	3.7	6.66	High	High	High	High	High	High	1		3	3	Present Both	1	GLYMA_12G028300	GLYMA_12G028300	sp|Q39085|DIM_ARATH	Delta(24)-sterol reductase GN=DIM	ident:480/567 pos:511/567 query:567 hit:561 align:564 bit:999.2	OK	Delta(24)-sterol reductase	Cell elongation protein DIMINUTO; Cell elongation protein Dwarf1; Protein CABBAGE1; Protein ENHANCED VERY-LOW-FLUENCE RESPONSE 1	DIM_ARATH	Q39085	Q0WWL4; Q38808; Q8RXF4	DIM	CBB1; DWF1; EVE1	Arabidopsis thaliana (Mouse-ear cress)
High	Master Protein	GLYMA_04G179700		1.3.5.1 - Succinate dehydrogenase (quinone) / Succinic dehydrogenase (1 of 9)	0	33.076	35	4	21	4	95	10.9	9.94	53.45	4	0	1.615	0.733183	22.55	92.5	107.5	61.43	39.93	High	High	High	High	High	High	1		3	3	Present Both	1	GLYMA_04G179700	GLYMA_04G179700	sp|Q3E870|SDH7B_ARATH	Succinate dehydrogenase subunit 7B, mitochondrial GN=SDH7B	ident:62/95 pos:74/95 query:95 hit:100 align:93 bit:113.2	OK	Succinate dehydrogenase subunit 7B, mitochondrial	na	SDH7B_ARATH	Q3E870	Q8LBU0	SDH7B	na	Arabidopsis thaliana (Mouse-ear cress)
High	Master Protein	GLYMA_20G018300		1.3.5.1 - Succinate dehydrogenase (quinone) / Succinic dehydrogenase (1 of 9)	0	36.522	35	4	18	4	141	15.8	7.56	58.27	4	0	0.738	0.970114	46.44	141.4	58.6	39.89	49.25	High	High	High	High	High	High	1		3	3	Present Both	1	GLYMA_20G018300	GLYMA_20G018300	sp|Q941A6|SDH6_ARATH	Succinate dehydrogenase subunit 6, mitochondrial GN=SDH6	ident:92/141 pos:111/141 query:141 hit:142 align:130 bit:207.6	OK	Succinate dehydrogenase subunit 6, mitochondrial	na	SDH6_ARATH	Q941A6	na	SDH6	na	Arabidopsis thaliana (Mouse-ear cress)
High	Master Protein	GLYMA_19G080600		1.3.5.1//1.3.99.1 - Succinate dehydrogenase (quinone) / Succinic dehydrogenase (1 of 1)	0	83.604	39	10	54	5	277	31.1	8.62	145.25	10	5	1.494	0.820214	57.65	91	109	34.94	7.34	High	High	High	High	High	High	1		3	3	Present Both	1	GLYMA_19G080600	GLYMA_19G080600	sp|Q8LB02|SDHB2_ARATH	Succinate dehydrogenase [ubiquinone] iron-sulfur subunit 2, mitochondrial GN=SDH2-2	ident:220/277 pos:238/277 query:277 hit:280 align:277 bit:455.3	OK	Succinate dehydrogenase [ubiquinone] iron-sulfur subunit 2, mitochondrial	Iron-sulfur subunit of complex II (Ip)	SDHB2_ARATH	Q8LB02	Q9FM32; Q9G3L9	SDH2-2	na	Arabidopsis thaliana (Mouse-ear cress)
High	Master Protein	GLYMA_05G134900		1.6.5.3 - NADH:ubiquinone reductase (H(+)-translocating) / Ubiquinone reductase (1 of 59)	0	103.385	60	5	48	5	108	12.3	7.34	226.1	5	0	0.815	0.996833	50.12	92.3	107.7	33.77	42.24	High	High	High	High	High	High	1		3	3	Present Both	1	GLYMA_05G134900	GLYMA_05G134900	sp|F4I460|MYO8_ARATH	Myosin-8 GN=XI-B	ident:16/108 pos:27/108 query:108 hit:1500 align:51 bit:28.1	Partial_match_both	Myosin-8	Myosin XI B (AtXIB)	MYO8_ARATH	F4I460	O64491	XI-B	XIB	Arabidopsis thaliana (Mouse-ear cress)
High	Master Protein	GLYMA_07G130200		1.6.5.3 - NADH:ubiquinone reductase (H(+)-translocating) / Ubiquinone reductase (1 of 59)	0	10.977	25	3	16	3	75	8.7	8.53	33.36	3	0	1.785	0.58558	25.58	71.5	128.5	11.83	11.39	High	High	High	High	High	High	1		3	3	Present Both	1	GLYMA_07G130200	GLYMA_07G130200	sp|Q9FJ87|DTX50_ARATH	Protein DETOXIFICATION 50 GN=DTX50	ident:13/75 pos:18/75 query:75 hit:505 align:34 bit:26.2	Partial_match_both	Protein DETOXIFICATION 50 (AtDTX50)	DETOXIFICATION EFFLUX CARRIER 50; Multidrug and toxic compound extrusion protein 50 (MATE protein 50); Protein ABNORMAL SHOOT 3-like 1	DTX50_ARATH	Q9FJ87	Q7FLS2	DTX50	na	Arabidopsis thaliana (Mouse-ear cress)
High	Master Protein	GLYMA_08G104300		1.6.99.3 - NADH dehydrogenase / Type I dehydrogenase (1 of 23)	0	92.257	66	7	47	7	91	11.2	8.18	191.26	7	0	1.275	0.959456	31.32	92.9	107.1	16.45	28.76	High	High	High	High	High	High	1		3	3	Present Both	1	GLYMA_08G104300	GLYMA_08G104300	sp|Q9SS87|SEOB_ARATH	Protein SIEVE ELEMENT OCCLUSION B GN=SEOB	ident:20/91 pos:32/91 query:91 hit:740 align:66 bit:30.4	Partial_match_hit	Protein SIEVE ELEMENT OCCLUSION B (AtSEOb)	Protein SIEVE ELEMENT OCCLUSION-RELATED 1 (AtSEOR1)	SEOB_ARATH	Q9SS87	na	SEOB	na	Arabidopsis thaliana (Mouse-ear cress)
High	Master Protein	GLYMA_07G008200		2.3.1.225 - Protein S-acyltransferase / S-protein acyltransferase (1 of 46)	0	13.596	22	2	5	2	99	11.1	5.54	6.54	2	0	0.543	0.687353	9.35	134.4	65.6	18.32	10.7	High	High	Peak Found	High	Peak Found	High	1		3	3	Present Both	1	GLYMA_07G008200	GLYMA_07G008200	sp|O22898|LACS1_ARATH	Long chain acyl-CoA synthetase 1 GN=LACS1	ident:19/99 pos:31/99 query:99 hit:660 align:66 bit:30.4	Partial_match_hit	Long chain acyl-CoA synthetase 1	Protein ECERIFERUM 8	LACS1_ARATH	O22898	Q56WP3; Q56ZG8	LACS1	CER8	Arabidopsis thaliana (Mouse-ear cress)
High	Master Protein	GLYMA_02G292500		2.3.1.61 - Dihydrolipoyllysine-residue succinyltransferase / Succinyl-CoA:dihydrolipoate S-succinyltransferase (1 of 2)	0	155.063	36	14	80	4	464	50.5	9.23	270.59	14	11	1.369	0.914372	47.32	82	118	45.69	23.93	High	High	High	High	High	High	1		3	3	Present Both	1	GLYMA_02G292500	GLYMA_02G292500	sp|Q8H107|ODO2B_ARATH	Dihydrolipoyllysine-residue succinyltransferase component of 2-oxoglutarate dehydrogenase complex 2, mitochondrial GN=BCDH BETA1	ident:314/464 pos:364/464 query:464 hit:464 align:468 bit:606.3	OK	Dihydrolipoyllysine-residue succinyltransferase component of 2-oxoglutarate dehydrogenase complex 2, mitochondrial	2-oxoglutarate dehydrogenase complex component E2-2 (OGDC-E2-2); Dihydrolipoamide succinyltransferase component of 2-oxoglutarate dehydrogenase complex 2; E2K-2	ODO2B_ARATH	Q8H107	Q3E9W2; Q8LGI7; Q9SZ31	OrderedLocusNames=At4g26910	na	Arabidopsis thaliana (Mouse-ear cress)
High	Master Protein	GLYMA_02G308500		2.3.1.9 - Acetyl-CoA C-acetyltransferase / Acetoacetyl-CoA thiolase (1 of 4)	0	34.769	20	4	8	4	407	41.6	6.57	29.34	4	0	0.711	0.961188	32.88	126.1	73.9	63.53	54.39	High	High	High	Peak Found	High	High	1		3	3	Present Both	1	GLYMA_02G308500	GLYMA_02G308500	sp|Q8S4Y1|THIC1_ARATH	Acetyl-CoA acetyltransferase, cytosolic 1 GN=AAT1	ident:344/407 pos:376/407 query:407 hit:403 align:402 bit:681.0	OK	Acetyl-CoA acetyltransferase, cytosolic 1	Cytosolic acetoacetyl-CoA thiolase 1 (Thiolase 1); Protein EMBRYO DEFECTIVE 1276	THIC1_ARATH	Q8S4Y1	Q93YW6; Q9LUB1	AAT1	EMB1276	Arabidopsis thaliana (Mouse-ear cress)
High	Master Protein	GLYMA_01G225200		2.7.8.11//6.2.1.3 - CDP-diacylglycerol--inositol 3-phosphatidyltransferase / Phosphatidylinositol synthase // Long-chain-fatty-acid--CoA ligase / Lignoceroyl-CoA synthase (1 of 3)	0	4.529	1	2	3	2	671	75.3	7.23	6.11	2	0	0.698	0.946051	19.19	116.5	83.5	28.49	34.01	High	Peak Found	Peak Found	High	Peak Found	High	1		3	3	Present Both	1	GLYMA_01G225200	GLYMA_01G225200	sp|Q9T0A0|LACS4_ARATH	Long chain acyl-CoA synthetase 4 GN=LACS4	ident:490/671 pos:574/671 query:671 hit:666 align:645 bit:1057.4	OK	Long chain acyl-CoA synthetase 4	na	LACS4_ARATH	Q9T0A0	na	LACS4	na	Arabidopsis thaliana (Mouse-ear cress)
High	Master Protein	GLYMA_11G017900		2.7.8.11//6.2.1.3 - CDP-diacylglycerol--inositol 3-phosphatidyltransferase / Phosphatidylinositol synthase // Long-chain-fatty-acid--CoA ligase / Lignoceroyl-CoA synthase (1 of 3)	0	11.681	2	1	6	1	663	74	7.66	16.53	1	0	1.912	0.490293	32.44	60.1	139.9	70.05	25	High	High	High	High	High	High	1		3	3	Present Both	1	GLYMA_11G017900	GLYMA_11G017900	sp|Q9T0A0|LACS4_ARATH	Long chain acyl-CoA synthetase 4 GN=LACS4	ident:490/663 pos:577/663 query:663 hit:666 align:658 bit:1053.5	OK	Long chain acyl-CoA synthetase 4	na	LACS4_ARATH	Q9T0A0	na	LACS4	na	Arabidopsis thaliana (Mouse-ear cress)
High	Master Protein	GLYMA_08G200000		3.1.3.2 - Acid phosphatase / Phosphomonoesterase (1 of 61)	0	38.128	29	5	5	5	267	30.3	7.83	15.18	5	0	0.01	1.31e-16		200				High	Not Found	Not Found	Not Found	Not Found	Not Found	1		1	0	Missing Both	1	GLYMA_08G200000	GLYMA_08G200000	sp|O49195|VSP1_ARATH	Vegetative storage protein 1 GN=VSP1	ident:108/267 pos:145/267 query:267 hit:270 align:230 bit:197.6	Poor_match	Vegetative storage protein 1	na	VSP1_ARATH	O49195	O23827; O82121; Q39259; Q42000; Q93VJ6	VSP1	na	Arabidopsis thaliana (Mouse-ear cress)
High	Master Protein	GLYMA_10G134700		3.1.3.2 - Acid phosphatase / Phosphomonoesterase (1 of 61)	0	20.672	15	3	8	1	255	29.5	8.75	24.69	3	0	0.33	0.110949	0	150.4	49.6			High	High	Not Found	High	High	High	1		2	3	Present Both	1	GLYMA_10G134700	GLYMA_10G134700	sp|O49195|VSP1_ARATH	Vegetative storage protein 1 GN=VSP1	ident:86/255 pos:129/255 query:255 hit:270 align:233 bit:154.8	Poor_match	Vegetative storage protein 1	na	VSP1_ARATH	O49195	O23827; O82121; Q39259; Q42000; Q93VJ6	VSP1	na	Arabidopsis thaliana (Mouse-ear cress)
High	Master Protein	GLYMA_01G081300		3.2.1.177 - Alpha-D-xyloside xylohydrolase / Alpha-xylosidase (1 of 3)	0	33.21	6	6	26	6	928	102.9	6.7	67.53	6	0	0.411	0.30101	9.7	153.5	46.5	56.93	6.17	High	High	High	High	High	High	1		3	3	Present Both	1	GLYMA_01G081300	GLYMA_01G081300	sp|Q9S7Y7|XYL1_ARATH	Alpha-xylosidase 1 GN=XYL1	ident:682/928 pos:782/928 query:928 hit:915 align:900 bit:1459.9	OK	Alpha-xylosidase 1	na	XYL1_ARATH	Q9S7Y7	P80846; Q9ZP26	XYL1	AXY3	Arabidopsis thaliana (Mouse-ear cress)
High	Master Protein	GLYMA_01G240300		3.2.2.22 - rRNA N-glycosylase / rRNA N-glycosidase (1 of 1)	0	10.236	4	2	7	1	553	61	8.59	15.77	2	0	0.01	1.31e-16		200		37.66		High	High	Not Found	Not Found	Not Found	High	1		2	1	Only Control	1	GLYMA_01G240300	GLYMA_01G240300	sp|Q1JPL7|PME18_ARATH	Pectinesterase/pectinesterase inhibitor 18 GN=PME18	ident:319/553 pos:402/553 query:553 hit:557 align:559 bit:637.1	OK	Bifunctional pectinesterase 18/rRNA N-glycosylase	AtPMEpcrA; Pectin methylesterase inhibitor 18 (PE 18); Pectin methylesterase 18; Pectin methylesterase 4 (AtPME4); Ribosome-inactivating protein	PME18_ARATH	Q1JPL7	O49007; Q94AF4; Q94C39; Q9LPX8; Q9LPX9	PME18	ARATH4	Arabidopsis thaliana (Mouse-ear cress)
High	Master Protein	GLYMA_02G028700		3.4.24.7 - Interstitial collagenase / Vertebrate collagenase (1 of 6)	0.001	2.749	2	1	2	1	390	44.4	7.02	1.98	1	0	0.7	0.946051	3.78	117.6	82.4	58.84		High	High	Peak Found	Not Found	Not Found	Peak Found	1		3	1	Only Control	1	GLYMA_02G028700	GLYMA_02G028700	sp|Q9ZUJ5|5MMP_ARATH	Metalloendoproteinase 5-MMP GN=5MMP	ident:105/390 pos:150/390 query:390 hit:360 align:291 bit:151.4	Poor_match	Metalloendoproteinase 5-MMP (At5-MMP)	na	5MMP_ARATH	Q9ZUJ5	na	5MMP	na	Arabidopsis thaliana (Mouse-ear cress)
High	Master Protein	GLYMA_11G199900		3.6.4.8 - Proteasome ATPase / RP triple-A protein (1 of 3)	0	41.891	18	5	16	4	423	47.4	5.6	52.1	5	0	1.322	0.945815	92.13	87.6	112.4	103.75	104.12	High	High	Peak Found	Not Found	High	High	1		3	2	Present Both	1	GLYMA_11G199900	GLYMA_11G199900	sp|Q9SEI4|PRS6B_ARATH	26S proteasome regulatory subunit 6B homolog GN=RPT3	ident:383/423 pos:394/423 query:423 hit:408 align:420 bit:780.8	OK	26S proteasome regulatory subunit 6B homolog	26S protease subunit 6B homolog; 26S proteasome AAA-ATPase subunit RPT3; Protein BMAA insensitive morphology 409; Regulatory particle triple-A ATPase subunit 3	PRS6B_ARATH	Q9SEI4	Q5PNS4	RPT3	BIM409	Arabidopsis thaliana (Mouse-ear cress)
High	Master Protein	GLYMA_02G222400		4.1.2.13 - Fructose-bisphosphate aldolase / Fructose-1,6-bisphosphate triosephosphate-lyase (1 of 15)	0	160.693	56	18	102	6	358	38.2	7.55	326.81	18	0	0.909	0.996833	30.79	85.1	114.9	22.5	13.8	High	High	High	High	High	High	1		3	3	Present Both	1	GLYMA_02G222400	GLYMA_02G222400	sp|Q9SJQ9|ALFC6_ARATH	Fructose-bisphosphate aldolase 6, cytosolic GN=FBA6	ident:307/358 pos:331/358 query:358 hit:358 align:358 bit:639.8	OK	Fructose-bisphosphate aldolase 6, cytosolic (AtFBA6)	Cytosolic aldolase 2 (cAld2)	ALFC6_ARATH	Q9SJQ9	na	FBA6	na	Arabidopsis thaliana (Mouse-ear cress)
High	Master Protein	GLYMA_14G189400		4.1.2.13 - Fructose-bisphosphate aldolase / Fructose-1,6-bisphosphate triosephosphate-lyase (1 of 15)	0	252.914	65	24	140	11	358	38.3	7.53	472.32	24	10	0.821	0.996833	40.68	115.6	84.4	23.41	17.27	High	High	High	High	High	High	1		3	3	Present Both	1	GLYMA_14G189400	GLYMA_14G189400	sp|Q9SJQ9|ALFC6_ARATH	Fructose-bisphosphate aldolase 6, cytosolic GN=FBA6	ident:313/358 pos:332/358 query:358 hit:358 align:358 bit:647.1	OK	Fructose-bisphosphate aldolase 6, cytosolic (AtFBA6)	Cytosolic aldolase 2 (cAld2)	ALFC6_ARATH	Q9SJQ9	na	FBA6	na	Arabidopsis thaliana (Mouse-ear cress)
High	Master Protein	GLYMA_09G270500		5.4.2.11//5.4.2.12 - Phosphoglycerate mutase (2,3-diphosphoglycerate-dependent) / Phosphoglyceromutase // Phosphoglycerate mutase (2,3-diphosphoglycerate-independent) / Phosphoglyceromutase (1 of 2)	0	15	7	2	4	2	559	60.8	5.78	13.59	2	0	0.01	1.31e-16		200				High	High	Not Found	Not Found	High	High	1		2	2	Present Both	1	GLYMA_09G270500	GLYMA_09G270500	sp|O04499|PMG1_ARATH	2,3-bisphosphoglycerate-independent phosphoglycerate mutase 1 GN=PGM1	ident:470/559 pos:506/559 query:559 hit:557 align:556 bit:978.8	OK	2,3-bisphosphoglycerate-independent phosphoglycerate mutase 1 (BPG-independent PGAM 1; Phosphoglyceromutase 1)	PGAM-I 1	PMG1_ARATH	O04499	Q8LD62	PGM1	na	Arabidopsis thaliana (Mouse-ear cress)
High	Master Protein	GLYMA_12G159300		K00026 - malate dehydrogenase (MDH2) (1 of 7)	0	85.45	50	9	29	9	345	36.1	8.12	116.29	9	0	0.935	0.996833	36.91	35.1	164.9	120.5	58.22	High	High	High	High	High	High	1		3	3	Present Both	1	GLYMA_12G159300	GLYMA_12G159300	sp|Q9ZP06|MDHM1_ARATH	Malate dehydrogenase 1, mitochondrial GN=IDM2	ident:286/345 pos:313/345 query:345 hit:341 align:341 bit:590.1	OK	Malate dehydrogenase 1, mitochondrial	Mitochondrial MDH1 (mMDH1); Mitochondrial NAD-dependent malate dehydrogenase 1 (mNAD-MDH 1; mtNAD-MDH1)	MDHM1_ARATH	Q9ZP06	Q8LBB9; Q9MAH7	OrderedLocusNames=At1g53240	na	Arabidopsis thaliana (Mouse-ear cress)
High	Master Protein	GLYMA_12G210000		K00053 - ketol-acid reductoisomerase (ilvC) (1 of 3)	0	19.604	9	4	9	4	586	63.3	7.3	26.99	4	0	0.662	0.914455	17.22	107.6	92.4	11.14	38.65	High	High	High	High	High	High	1		3	3	Present Both	1	GLYMA_12G210000	GLYMA_12G210000	sp|Q05758|ILV5_ARATH	Ketol-acid reductoisomerase, chloroplastic GN=ILR3	ident:472/586 pos:506/586 query:586 hit:591 align:532 bit:1001.1	OK	Ketol-acid reductoisomerase, chloroplastic	Acetohydroxy-acid reductoisomerase; Alpha-keto-beta-hydroxylacyl reductoisomerase	ILV5_ARATH	Q05758	Q42559	OrderedLocusNames=At3g58610	na	Arabidopsis thaliana (Mouse-ear cress)
High	Master Protein	GLYMA_11G248000		K00059 - 3-oxoacyl- (fabG) (1 of 4)	0	11.838	11	3	9	3	320	33.9	9.28	13.97	3	0	0.935	0.996833	32.45	59.5	140.5	63.01	48.9	High	High	High	High	High	High	1		3	3	Present Both	1	GLYMA_11G248000	GLYMA_11G248000	sp|P33207|FABG_ARATH	3-oxoacyl-[acyl-carrier-protein] reductase, chloroplastic GN=RAT5	ident:211/320 pos:256/320 query:320 hit:319 align:309 bit:429.1	OK	3-oxoacyl-[acyl-carrier-protein] reductase, chloroplastic	3-ketoacyl-acyl carrier protein reductase	FABG_ARATH	P33207	O04463; Q9FPJ6	OrderedLocusNames=At1g24360	na	Arabidopsis thaliana (Mouse-ear cress)
High	Master Protein	GLYMA_19G009100		K00122 - formate dehydrogenase (FDH) (1 of 3)	0	45.403	14	5	13	5	389	42.8	6.77	36.16	5	0	0.539	0.677962	31.5	175.5	24.5	50.48	150.33	High	High	Peak Found	Peak Found	Peak Found	High	1		3	3	Present Both	1	GLYMA_19G009100	GLYMA_19G009100	sp|Q9S7E4|FDH_ARATH	Formate dehydrogenase, chloroplastic/mitochondrial GN=FDH1	ident:296/389 pos:322/389 query:389 hit:384 align:354 bit:599.4	OK	Formate dehydrogenase, chloroplastic/mitochondrial (FDH)	NAD-dependent formate dehydrogenase	FDH_ARATH	Q9S7E4	na	FDH1	FDH	Arabidopsis thaliana (Mouse-ear cress)
High	Master Protein	GLYMA_07G179700		K00145 - N-acetyl-gamma-glutamyl-phosphate reductase (argC) (1 of 2)	0	5.339	3	1	4	1	391	42.8	8.07	7.8	1	0	0.292	0.0573702	0.96	154.8	45.2	18.54		High	High	Peak Found	Not Found	High	High	1		3	2	Present Both	1	GLYMA_07G179700	GLYMA_07G179700	sp|Q93Z70|ARGC_ARATH	Probable N-acetyl-gamma-glutamyl-phosphate reductase, chloroplastic GN=ARF17	ident:259/391 pos:310/391 query:391 hit:401 align:346 bit:565.5	OK	Probable N-acetyl-gamma-glutamyl-phosphate reductase, chloroplastic (AGPR)	N-acetyl-glutamate semialdehyde dehydrogenase (NAGSA dehydrogenase)	ARGC_ARATH	Q93Z70	O82187	OrderedLocusNames=At2g19940	na	Arabidopsis thaliana (Mouse-ear cress)
High	Master Protein	GLYMA_18G287400		K00164 - 2-oxoglutarate dehydrogenase E1 component (OGDH, sucA) (1 of 3)	0	32.752	8	6	23	1	1025	116	6.86	52.23	6	0	0.632	0.862691	13.75	129.2	70.8	24.92	32.84	High	Peak Found	Not Found	Peak Found	High	High	1		2	3	Present Both	1	GLYMA_18G287400	GLYMA_18G287400	sp|Q8H1Y0|ODPA2_ARATH	Pyruvate dehydrogenase E1 component subunit alpha-2, mitochondrial GN=IAR4	ident:47/1025 pos:92/1025 query:1025 hit:393 align:196 bit:44.3	Partial_match_both	Pyruvate dehydrogenase E1 component subunit alpha-2, mitochondrial (PDHE1-A)	Protein IAA-CONJUGATE-RESISTANT 4	ODPA2_ARATH	Q8H1Y0	O48685	IAR4	na	Arabidopsis thaliana (Mouse-ear cress)
High	Master Protein	GLYMA_01G175600		K00234 - succinate dehydrogenase (ubiquinone) flavoprotein subunit (SDHA, SDH1) (1 of 3)	0	59.511	16	9	32	9	630	69.3	6.67	93.39	9	0	1.211	0.977957	50.82	95.6	104.4	47.88	12.64	High	High	High	High	High	High	1		3	3	Present Both	1	GLYMA_01G175600	GLYMA_01G175600	sp|O82663|SDHA1_ARATH	Succinate dehydrogenase [ubiquinone] flavoprotein subunit 1, mitochondrial GN=SDH1-1	ident:564/630 pos:605/630 query:630 hit:634 align:634 bit:1159.0	OK	Succinate dehydrogenase [ubiquinone] flavoprotein subunit 1, mitochondrial	Flavoprotein subunit 1 of complex II (FP)	SDHA1_ARATH	O82663	na	SDH1-1	na	Arabidopsis thaliana (Mouse-ear cress)
High	Master Protein	GLYMA_02G066500		K00411 - ubiquinol-cytochrome c reductase iron-sulfur subunit (UQCRFS1, RIP1, petA) (1 of 3)	0	67.869	20	6	17	6	266	29.3	8.66	79.56	6	0	0.512	0.604739	23.9	179.3	20.7	58	83.87	High	High	High	High	High	High	1		3	3	Present Both	1	GLYMA_02G066500	GLYMA_02G066500	sp|Q94JS0|UCRI1_ARATH	Cytochrome b-c1 complex subunit Rieske-1, mitochondrial GN=UCR1-1	ident:201/266 pos:221/266 query:266 hit:272 align:277 bit:400.2	OK	Cytochrome b-c1 complex subunit Rieske-1, mitochondrial	Complex III subunit 5-1; Rieske iron-sulfur protein 1 (RISP1); Ubiquinol-cytochrome c reductase iron-sulfur subunit 1	UCRI1_ARATH	Q94JS0	Q42140; Q56Z01; Q56Z95; Q8LEK8; Q9LYR3	UCR1-1	na	Arabidopsis thaliana (Mouse-ear cress)
High	Master Protein	GLYMA_14G126300		K00417 - ubiquinol-cytochrome c reductase subunit 7 (QCR7, UQCRB) (1 of 2)	0	275.953	75	16	170	2	122	14.6	9.61	546.41	16	0	3.705	0.0175436	41.55	40.4	159.6	33.67	10.14	High	High	High	High	High	High	1		3	3	Present Both	1	GLYMA_14G126300	GLYMA_14G126300	sp|F4JWS8|QCR72_ARATH	Cytochrome b-c1 complex subunit 7-2 GN=QCR7-2	ident:98/122 pos:110/122 query:122 hit:122 align:122 bit:205.7	OK	Cytochrome b-c1 complex subunit 7-2	Complex III subunit VII	QCR72_ARATH	F4JWS8	na	QCR7-2	na	Arabidopsis thaliana (Mouse-ear cress)
High	Master Protein	GLYMA_17G208000		K00417 - ubiquinol-cytochrome c reductase subunit 7 (QCR7, UQCRB) (1 of 2)	0	308.332	75	17	195	3	122	14.5	9.58	683.78	17	20	2.287	0.257292	75.21	53.8	146.2	25.53	14.08	High	High	High	High	High	High	1		3	3	Present Both	1	GLYMA_17G208000	GLYMA_17G208000	sp|F4JWS8|QCR72_ARATH	Cytochrome b-c1 complex subunit 7-2 GN=QCR7-2	ident:97/122 pos:110/122 query:122 hit:122 align:122 bit:206.1	OK	Cytochrome b-c1 complex subunit 7-2	Complex III subunit VII	QCR72_ARATH	F4JWS8	na	QCR7-2	na	Arabidopsis thaliana (Mouse-ear cress)
High	Master Protein	GLYMA_03G195700		K00419 - ubiquinol-cytochrome c reductase subunit 9 (QCR9, UCRC) (1 of 2)	0	94.688	83	9	73	8	71	8.1	9.6	222.05	9	1	1.464	0.844136	54.78	83.3	116.7	17.65	8.53	High	High	High	High	High	High	1		3	3	Present Both	1	GLYMA_03G195700	GLYMA_03G195700	sp|Q9SHE9|LBD4_ARATH	LOB domain-containing protein 4 GN=LBD4	ident:16/71 pos:34/71 query:71 hit:172 align:65 bit:28.1	Partial_match_hit	LOB domain-containing protein 4	ASYMMETRIC LEAVES 2-like protein 6 (AS2-like protein 6)	LBD4_ARATH	Q9SHE9	B7XG60; Q6DBF5	LBD4	ASL6	Arabidopsis thaliana (Mouse-ear cress)
High	Master Protein	GLYMA_13G153500		K00419 - ubiquinol-cytochrome c reductase subunit 9 (QCR9, UCRC) (1 of 2)	0	34.467	55	7	24	6	73	8.4	9.25	58.44	7	0	1.424	0.863892	30.87	85	115	17.16	18.46	High	High	High	High	High	High	1		3	3	Present Both	1	GLYMA_13G153500	GLYMA_13G153500	sp|Q9LHF0|ZHD9_ARATH	Zinc-finger homeodomain protein 9 GN=ZHD9	ident:11/73 pos:12/73 query:73 hit:312 align:19 bit:26.6	Partial_match_both	Zinc-finger homeodomain protein 9 (AtZHD9)	Homeobox protein 34 (AtHB-34)	ZHD9_ARATH	Q9LHF0	na	ZHD9	HB34	Arabidopsis thaliana (Mouse-ear cress)
High	Master Protein	GLYMA_14G201700		K00430 - peroxidase (E1.11.1.7) (1 of 157)	0	116.721	41	12	44	11	359	40	9.54	127.62	12	1	0.78	0.996833	60.26	128.3	71.7	72.38	65.59	High	High	High	High	High	High	1		3	3	Present Both	1	GLYMA_14G201700	GLYMA_14G201700	sp|Q9FLC0|PER52_ARATH	Peroxidase 52 GN=PER52	ident:175/359 pos:220/359 query:359 hit:324 align:304 bit:345.9	Poor_match	Peroxidase 52 (Atperox P52)	ATP49	PER52_ARATH	Q9FLC0	na	PER52	P52	Arabidopsis thaliana (Mouse-ear cress)
High	Master Protein	GLYMA_16G164200		K00430 - peroxidase (E1.11.1.7) (1 of 157)	0	86.679	38	12	40	12	345	37.8	7.36	117.22	12	0	0.814	0.996833	28.22	107.9	92.1	7.11	18.14	High	High	High	High	High	High	1		3	3	Present Both	1	GLYMA_16G164200	GLYMA_16G164200	sp|Q96520|PER12_ARATH	Peroxidase 12 GN=PER12	ident:185/345 pos:245/345 query:345 hit:358 align:347 bit:368.2	OK	Peroxidase 12 (Atperox P12)	ATP4a; PRXR6	PER12_ARATH	Q96520	Q43734	PER12	P12	Arabidopsis thaliana (Mouse-ear cress)
High	Master Protein	GLYMA_16G164400		K00430 - peroxidase (E1.11.1.7) (1 of 157)	0	343.929	47	27	214	27	345	38.1	6.44	757.19	27	0	0.491	0.541899	16	106.2	93.8	45.64	49.33	High	High	High	High	High	High	1		3	3	Present Both	1	GLYMA_16G164400	GLYMA_16G164400	sp|Q96520|PER12_ARATH	Peroxidase 12 GN=PER12	ident:159/345 pos:205/345 query:345 hit:358 align:319 bit:306.2	Poor_match	Peroxidase 12 (Atperox P12)	ATP4a; PRXR6	PER12_ARATH	Q96520	Q43734	PER12	P12	Arabidopsis thaliana (Mouse-ear cress)
High	Master Protein	GLYMA_16G038300		K00549 - 5-methyltetrahydropteroyltriglutamate--homocysteine methyltransferase (metE) (1 of 6)	0	67.465	18	13	33	13	763	84.2	6.33	99.37	13	0	1.051	0.996833	68.23	99.6	100.4	30.98	5.17	High	High	High	High	High	High	1		3	3	Present Both	1	GLYMA_16G038300	GLYMA_16G038300	sp|O50008|METE1_ARATH	5-methyltetrahydropteroyltriglutamate--homocysteine methyltransferase 1 GN=MS1	ident:673/763 pos:718/763 query:763 hit:765 align:762 bit:1421.0	OK	5-methyltetrahydropteroyltriglutamate--homocysteine methyltransferase 1	Cobalamin-independent methionine synthase 1 (AtMS1); Vitamin-B12-independent methionine synthase 1	METE1_ARATH	O50008	Q6KCR2; Q8H162; Q93ZK3	MS1	CIMS	Arabidopsis thaliana (Mouse-ear cress)
High	Master Protein	GLYMA_08G108900		K00600 - glycine hydroxymethyltransferase (glyA, SHMT) (1 of 12)	0	30.138	8	4	6	4	572	63.1	7.97	22.94	4	0	0.861	0.996833	35.02	172.8	27.2	7.85	27.32	High	High	High	Peak Found	High	Peak Found	1		3	3	Present Both	1	GLYMA_08G108900	GLYMA_08G108900	sp|O23254|GLYC4_ARATH	Serine hydroxymethyltransferase 4 GN=SHM4	ident:420/572 pos:445/572 query:572 hit:471 align:502 bit:872.8	OK	Serine hydroxymethyltransferase 4 (AtSHMT4)	Glycine hydroxymethyltransferase 4; Serine methylase 4	GLYC4_ARATH	O23254	Q8LBY1; Q9FPJ3	SHM4	SHMT4	Arabidopsis thaliana (Mouse-ear cress)
High	Master Protein	GLYMA_08G362900		K00616 - transaldolase (E2.2.1.2, talA, talB) (1 of 10)	0	23.614	12	3	8	3	439	47.9	6.21	21.29	3	0	0.985	0.996833	79.03	98.6	101.4	4.17	19.78	High	High	High	High	High	Peak Found	1		3	3	Present Both	1	GLYMA_08G362900	GLYMA_08G362900	sp|O82333|GH31_ARATH	Probable indole-3-acetic acid-amido synthetase GH3.1 GN=GH3.1	ident:21/439 pos:35/439 query:439 hit:590 align:71 bit:33.1	Partial_match_both	Probable indole-3-acetic acid-amido synthetase GH3.1	Auxin-responsive GH3-like protein 1 (AtGH3-1)	GH31_ARATH	O82333	na	GH3.1	na	Arabidopsis thaliana (Mouse-ear cress)
High	Master Protein	GLYMA_20G114500		K00627 - pyruvate dehydrogenase E2 component (dihydrolipoamide acetyltransferase) (DLAT, aceF, pdhC) (1 of 7)	0	85.12	22	8	36	8	506	52.7	8.16	124.79	8	0	1.272	0.962284	42.06	78.2	121.8	16.47	18.33	High	High	High	High	High	High	1		3	3	Present Both	1	GLYMA_20G114500	GLYMA_20G114500	sp|Q9SQI8|ODP24_ARATH	Dihydrolipoyllysine-residue acetyltransferase component 4 of pyruvate dehydrogenase complex, chloroplastic GN=LTA2	ident:348/506 pos:389/506 query:506 hit:480 align:507 bit:616.3	OK	Dihydrolipoyllysine-residue acetyltransferase component 4 of pyruvate dehydrogenase complex, chloroplastic	Dihydrolipoamide S-acetyltransferase component 4 of pyruvate dehydrogenase complex; Pyruvate dehydrogenase complex component E2 4 (PDC-E2 4; PDCE2 4; plE2)	ODP24_ARATH	Q9SQI8	Q9LUA6	LTA2	na	Arabidopsis thaliana (Mouse-ear cress)
High	Master Protein	GLYMA_18G057700		K00645 - fabD (1 of 2)	0	8.855	6	2	7	2	358	37.9	8.37	14.83	2	0	0.486	0.526849	16.01	147.2	52.8	48.32	46.92	High	High	Peak Found	High	High	High	1		3	3	Present Both	1	GLYMA_18G057700	GLYMA_18G057700	No_match	nan	nan	No_match	na	na	na	na	na	na	na	na
High	Master Protein	GLYMA_01G159800		K00831 - phosphoserine aminotransferase (serC, PSAT1) (1 of 3)	0	17.021	8	2	9	2	413	45.5	8.24	31.14	2	0	0.774	0.996833	30.33	112.7	87.3	6.83	50.71	High	High	High	High	High	High	1		3	3	Present Both	1	GLYMA_01G159800	GLYMA_01G159800	sp|Q96255|SERB1_ARATH	Phosphoserine aminotransferase 1, chloroplastic GN=PSAT1	ident:316/413 pos:350/413 query:413 hit:430 align:389 bit:664.8	OK	Phosphoserine aminotransferase 1, chloroplastic (AtPSAT1)	Phosphohydroxythreonine aminotransferase	SERB1_ARATH	Q96255	Q1EBU1; Q8L7P0; Q8LBA3	PSAT1	na	Arabidopsis thaliana (Mouse-ear cress)
High	Master Protein	GLYMA_09G007900		K00895 - pyrophosphate--fructose-6-phosphate 1-phosphotransferase (E2.7.1.90, pfk) (1 of 8)	0	32.207	10	3	10	3	562	61.4	7.03	35.92	3	0	0.846	0.996833	8.52	107.2	92.8	38.98	25.58	High	High	High	High	High	High	1		3	3	Present Both	1	GLYMA_09G007900	GLYMA_09G007900	sp|Q8W4M5|PFPB1_ARATH	Pyrophosphate--fructose 6-phosphate 1-phosphotransferase subunit beta 1 GN=PFP-BETA1	ident:483/562 pos:514/562 query:562 hit:566 align:567 bit:991.5	OK	Pyrophosphate--fructose 6-phosphate 1-phosphotransferase subunit beta 1 (PFP 1)	6-phosphofructokinase, pyrophosphate dependent 1; PPi-PFK 1; Pyrophosphate-dependent 6-phosphofructose-1-kinase 1	PFPB1_ARATH	Q8W4M5	O65379	PFP-BETA1	na	Arabidopsis thaliana (Mouse-ear cress)
High	Master Protein	GLYMA_07G115900		K00940 - nucleoside-diphosphate kinase (ndk, NME) (1 of 8)	0	71.875	56	8	39	8	149	16.5	6.8	132.73	8	0	0.729	0.970114	31.8	112	88	14.29	10.76	High	High	High	High	High	High	1		3	3	Present Both	1	GLYMA_07G115900	GLYMA_07G115900	sp|P39207|NDK1_ARATH	Nucleoside diphosphate kinase 1 GN=NDK1	ident:128/149 pos:136/149 query:149 hit:149 align:147 bit:268.9	OK	Nucleoside diphosphate kinase 1	Nucleoside diphosphate kinase I (NDK I; NDP kinase I; NDPK I)	NDK1_ARATH	P39207	F4JJZ8; Q41989; Q94JY5	NDK1	NDPK1	Arabidopsis thaliana (Mouse-ear cress)
High	Master Protein	GLYMA_06G307800		K01061 - carboxymethylenebutenolidase (E3.1.1.45) (1 of 3)	0	9.713	12	2	6	2	269	29.3	7.58	14.43	2	0	0.574	0.75101	8.87	114.6	85.4	36.55	55.61	High	High	High	High	High	High	1		3	3	Present Both	1	GLYMA_06G307800	GLYMA_06G307800	sp|Q84WK4|SOBR1_ARATH	Carboxylesterase SOBER1 GN=SOBER1	ident:43/269 pos:60/269 query:269 hit:228 align:135 bit:44.3	Partial_match_query	Carboxylesterase SOBER1	Phospholipase A2 SOBER1; Protein SUPPRESSOR OF AVRBST-ELICITED RESISTANCE 1	SOBR1_ARATH	Q84WK4	A4KWB0; O49635	SOBER1	na	Arabidopsis thaliana (Mouse-ear cress)
High	Master Protein	GLYMA_08G031800		K01412 - mitochondrial-processing peptidase subunit alpha [EC:3.4.24.64] (PMPCA, MAS2) (1 of 6)	0	201.19	34	17	107	7	509	54.8	5.77	424.07	17	10	0.951	0.999744	62.95	103	97	22.13	55.35	High	High	High	High	High	High	1	Phospho [Y496]	3	3	Present Both	1	GLYMA_08G031800	GLYMA_08G031800	sp|Q9ZU25|MPPA1_ARATH	Probable mitochondrial-processing peptidase subunit alpha-1, mitochondrial GN=MORF9	ident:329/509 pos:393/509 query:509 hit:503 align:508 bit:632.5	OK	Probable mitochondrial-processing peptidase subunit alpha-1, mitochondrial	Alpha-MPP 1	MPPA1_ARATH	Q9ZU25	Q0WW81; Q8L9K3	OrderedLocusNames=At1g51980	na	Arabidopsis thaliana (Mouse-ear cress)
High	Master Protein	GLYMA_08G199900		K01412 - mitochondrial-processing peptidase subunit alpha [EC:3.4.24.64] (PMPCA, MAS2) (1 of 6)	0	187.387	34	18	86	4	505	54.4	6.21	275.66	18	15	0.928	0.996833	44.31	98.1	101.9	13.86	26.72	High	High	High	High	High	High	1		3	3	Present Both	1	GLYMA_08G199900	GLYMA_08G199900	sp|Q9ZU25|MPPA1_ARATH	Probable mitochondrial-processing peptidase subunit alpha-1, mitochondrial GN=MORF9	ident:348/505 pos:406/505 query:505 hit:503 align:506 bit:664.1	OK	Probable mitochondrial-processing peptidase subunit alpha-1, mitochondrial	Alpha-MPP 1	MPPA1_ARATH	Q9ZU25	Q0WW81; Q8L9K3	OrderedLocusNames=At1g51980	na	Arabidopsis thaliana (Mouse-ear cress)
High	Master Protein	GLYMA_07G028500		K01507 - inorganic pyrophosphatase (ppa) (1 of 18)	0	60	10	5	17	5	768	80.7	5.58	75.04	5	0	0.967	0.996833	65.34	89.8	110.2	48.43	35.67	High	High	High	High	High	High	1		3	3	Present Both	1	GLYMA_07G028500	GLYMA_07G028500	sp|P31414|AVP1_ARATH	Pyrophosphate-energized vacuolar membrane proton pump 1 GN=AVP1	ident:691/768 pos:729/768 query:768 hit:770 align:766 bit:1399.0	OK	Pyrophosphate-energized vacuolar membrane proton pump 1	Pyrophosphate-energized inorganic pyrophosphatase 1 (H(+)-PPase 1); Vacuolar proton pyrophosphatase 1; Vacuolar proton pyrophosphatase 3	AVP1_ARATH	P31414	O80390; Q41919; Q41920; Q56WP6; Q8RY20; Q8VZE3	AVP1	AVP; AVP-3; AVP3	Arabidopsis thaliana (Mouse-ear cress)
High	Master Protein	GLYMA_01G080200		K01527 - nascent polypeptide-associated complex subunit beta (EGD1, BTF3) (1 of 4)	0	48.534	34	4	20	1	159	17.4	6.6	85.6	4	0	0.01	1.31e-16		200		63.7		High	High	Not Found	Not Found	Not Found	Not Found	1		2	0	Only Control	1	GLYMA_01G080200	GLYMA_01G080200	sp|Q9SMW7|BTF3_ARATH	Basic transcription factor 3 GN=BTF3	ident:123/159 pos:137/159 query:159 hit:165 align:151 bit:246.5	OK	Basic transcription factor 3 (AtBTF3)	Nascent polypeptide-associated complex subunit beta	BTF3_ARATH	Q9SMW7	Q93ZB5	BTF3	na	Arabidopsis thaliana (Mouse-ear cress)
High	Master Protein	GLYMA_11G113900		K01527 - nascent polypeptide-associated complex subunit beta (EGD1, BTF3) (1 of 4)	0	175.443	48	9	38	6	162	17.7	7.4	196.44	9	3	0.393	0.250086	14.7	170.5	29.5	67.67	32.52	High	High	High	Not Found	Not Found	High	1		3	1	Only Control	1	GLYMA_11G113900	GLYMA_11G113900	sp|Q9SMW7|BTF3_ARATH	Basic transcription factor 3 GN=BTF3	ident:132/162 pos:139/162 query:162 hit:165 align:152 bit:259.2	OK	Basic transcription factor 3 (AtBTF3)	Nascent polypeptide-associated complex subunit beta	BTF3_ARATH	Q9SMW7	Q93ZB5	BTF3	na	Arabidopsis thaliana (Mouse-ear cress)
High	Master Protein	GLYMA_09G061200		K01537 - Ca2+-transporting ATPase (E3.6.3.8) (1 of 29)	0	41.668	6	5	21	3	1085	117.8	7.83	62.09	5	2	1.16	0.996833	68.19	62.2	137.8	67.67	41.13	High	High	High	High	High	High	1		3	3	Present Both	1	GLYMA_09G061200	GLYMA_09G061200	sp|Q9LF79|ACA8_ARATH	Calcium-transporting ATPase 8, plasma membrane-type GN=ACA8	ident:805/1085 pos:922/1085 query:1085 hit:1074 align:1086 bit:1617.8	OK	Calcium-transporting ATPase 8, plasma membrane-type	Ca(2+)-ATPase isoform 8	ACA8_ARATH	Q9LF79	Q9LU75	ACA8	na	Arabidopsis thaliana (Mouse-ear cress)
High	Master Protein	GLYMA_13G046200		K01602 - ribulose-bisphosphate carboxylase small chain (rbcS) (1 of 5)	0.009	1.892	4	1	3	1	178	20	8.66	4.13	1	0	0.188	0.00220979	2.77	168.3	31.7	34.54	79.2	High	High	Not Found	Not Found	Peak Found	High	1		2	2	Present Both	1	GLYMA_13G046200	GLYMA_13G046200	sp|P10798|RBS3B_ARATH	Ribulose bisphosphate carboxylase small chain 3B, chloroplastic GN=RBCS-3B	ident:143/178 pos:155/178 query:178 hit:181 align:179 bit:302.8	OK	Ribulose bisphosphate carboxylase small chain 3B, chloroplastic (RuBisCO small subunit 3B)	na	RBS3B_ARATH	P10798	Q9FF21	RBCS-3B	ATS3B	Arabidopsis thaliana (Mouse-ear cress)
High	Master Protein	GLYMA_04G196100		K01652 - acetolactate synthase I/II/III large subunit (E2.2.1.6L, ilvB, ilvG, ilvI) (1 of 5)	0	25.191	9	4	10	2	639	69.1	7.28	31.68	4	2	0.681	0.945815	23.86	143.4	56.6	55.91	28.26	High	High	Not Found	High	Peak Found	High	1		2	3	Present Both	1	GLYMA_04G196100	GLYMA_04G196100	sp|P17597|ILVB_ARATH	Acetolactate synthase, chloroplastic GN=ALS	ident:466/639 pos:523/639 query:639 hit:670 align:586 bit:984.6	OK	Acetolactate synthase, chloroplastic (AtALS)	Acetohydroxy-acid synthase; Protein CHLORSULFURON RESISTANT 1	ILVB_ARATH	P17597	A0A174; Q5FV34; Q8L7Y7; Q94B64	ALS	AHAS; CSR1; TZP5	Arabidopsis thaliana (Mouse-ear cress)
High	Master Protein	GLYMA_07G162900		K01723 - hydroperoxide dehydratase (AOS) (1 of 4)	0	146.48	35	14	81	14	522	58.7	8.53	293	14	0	1.007	0.996833	44.15	91.4	108.6	13.01	14.61	High	High	High	High	High	High	1		3	3	Present Both	1	GLYMA_07G162900	GLYMA_07G162900	sp|Q96242|CP74A_ARATH	Allene oxide synthase, chloroplastic GN=CYP74A	ident:247/522 pos:337/522 query:522 hit:518 align:513 bit:487.3	Poor_match	Allene oxide synthase, chloroplastic	Cytochrome P450 74A; Hydroperoxide dehydrase	CP74A_ARATH	Q96242	P93720; Q9ZR51	CYP74A	AOS	Arabidopsis thaliana (Mouse-ear cress)
High	Master Protein	GLYMA_10G292200		K01859 - chalcone isomerase (E5.5.1.6) (1 of 4)	0	12.315	15	3	6	2	226	25	5.24	9.42	3	0	0.756	0.987098	26.84	104.3	95.7	26.48	52.05	High	High	Peak Found	Not Found	Peak Found	Peak Found	1		3	2	Present Both	1	GLYMA_10G292200	GLYMA_10G292200	sp|P41088|CFI1_ARATH	Chalcone--flavonone isomerase 1 GN=CHI1	ident:104/226 pos:147/226 query:226 hit:246 align:210 bit:210.3	Poor_match	Chalcone--flavonone isomerase 1 (Chalcone isomerase 1)	Protein TRANSPARENT TESTA 5	CFI1_ARATH	P41088	Q8W532; Q9LE13; Q9LF74; Q9LF75	CHI1	CFI; TT5	Arabidopsis thaliana (Mouse-ear cress)
High	Master Protein	GLYMA_20G241500		K01859 - chalcone isomerase (E5.5.1.6) (1 of 4)	0	58.083	50	7	22	6	218	23.3	6.7	54.84	7	1	0.955	0.999249	47.17	98.5	101.5	8.09	14.29	High	High	High	High	High	High	1		3	3	Present Both	1	GLYMA_20G241500	GLYMA_20G241500	sp|P41088|CFI1_ARATH	Chalcone--flavonone isomerase 1 GN=CHI1	ident:109/218 pos:147/218 query:218 hit:246 align:209 bit:220.7	Poor_match	Chalcone--flavonone isomerase 1 (Chalcone isomerase 1)	Protein TRANSPARENT TESTA 5	CFI1_ARATH	P41088	Q8W532; Q9LE13; Q9LF74; Q9LF75	CHI1	CFI; TT5	Arabidopsis thaliana (Mouse-ear cress)
High	Master Protein	GLYMA_18G195900		K01962 - acetyl-CoA carboxylase carboxyl transferase subunit alpha (accA) (1 of 3)	0	21.786	6	4	10	4	690	76.9	8.51	22.27	4	0	0.774	0.996833	16.71	77.9	122.1	45.5	40.35	High	Peak Found	High	High	High	High	1		3	3	Present Both	1	GLYMA_18G195900	GLYMA_18G195900	sp|Q9LD43|ACCA_ARATH	Acetyl-coenzyme A carboxylase carboxyl transferase subunit alpha, chloroplastic GN=CAC3	ident:417/690 pos:525/690 query:690 hit:769 align:665 bit:845.1	OK	Acetyl-coenzyme A carboxylase carboxyl transferase subunit alpha, chloroplastic (ACCase subunit alpha; Acetyl-CoA carboxylase carboxyltransferase subunit alpha)	na	ACCA_ARATH	Q9LD43	Q56YX0	CAC3	na	Arabidopsis thaliana (Mouse-ear cress)
High	Master Protein	GLYMA_12G232000		K02111 - F-type H+-transporting ATPase subunit alpha (ATPF1A, atpA) (1 of 2)	0	41.62	15	7	36	7	510	55.7	5.21	70.67	7	0	0.909	0.996833	27.35	107.4	92.6	30.92	12.83	High	High	High	High	High	High	1		3	3	Present Both	1	GLYMA_12G232000	GLYMA_12G232000	sp|P56757|ATPA_ARATH	ATP synthase subunit alpha, chloroplastic GN=atpA	ident:480/510 pos:492/510 query:510 hit:507 align:507 bit:966.5	OK	ATP synthase subunit alpha, chloroplastic	ATP synthase F1 sector subunit alpha; F-ATPase subunit alpha	ATPA_ARATH	P56757	na	atpA	na	Arabidopsis thaliana (Mouse-ear cress)
High	Master Protein	GLYMA_17G130100		K02113 - F-type H+-transporting ATPase subunit delta (ATPF1D, atpH) (1 of 2)	0	7.299	13	2	3	2	253	27.4	6.4	7.48	2	0	0.01	1.31e-16		200				High	Not Found	Not Found	Not Found	High	Not Found	1		1	1	Missing Both	1	GLYMA_17G130100	GLYMA_17G130100	sp|Q9SSS9|ATPD_ARATH	ATP synthase subunit delta, chloroplastic GN=ATPD	ident:153/253 pos:183/253 query:253 hit:234 align:254 bit:282.0	OK	ATP synthase subunit delta, chloroplastic	ATP synthase F(1) sector subunit delta; F-type ATPase subunit delta	ATPD_ARATH	Q9SSS9	Q8RY87	ATPD	na	Arabidopsis thaliana (Mouse-ear cress)
High	Master Protein	GLYMA_10G267200		K02133 - F-type H+-transporting ATPase subunit beta (ATPeF1B, ATP5B, ATP2) (1 of 3)	0	673.486	70	36	347	6	559	59.8	6.15	1444.41	36	36	0.837	0.996833	43.8	92	108	28.88	37.1	High	High	High	High	High	High	1		3	3	Present Both	1	GLYMA_10G267200	GLYMA_10G267200	sp|Q9C5A9|ATPBO_ARATH	ATP synthase subunit beta-3, mitochondrial GN=ATG8C	ident:453/559 pos:491/559 query:559 hit:559 align:540 bit:906.7	OK	ATP synthase subunit beta-3, mitochondrial	na	ATPBO_ARATH	Q9C5A9	na	OrderedLocusNames=At5g08680	na	Arabidopsis thaliana (Mouse-ear cress)
High	Master Protein	GLYMA_20G123600		K02133 - F-type H+-transporting ATPase subunit beta (ATPeF1B, ATP5B, ATP2) (1 of 3)	0	654.419	70	34	335	4	559	59.8	6.15	1413.78	34	0	0.653	0.89597	31.62	114	86	11.44	67.19	High	High	High	High	High	High	1		3	3	Present Both	1	GLYMA_20G123600	GLYMA_20G123600	sp|Q9C5A9|ATPBO_ARATH	ATP synthase subunit beta-3, mitochondrial GN=ATG8C	ident:451/559 pos:488/559 query:559 hit:559 align:524 bit:913.3	OK	ATP synthase subunit beta-3, mitochondrial	na	ATPBO_ARATH	Q9C5A9	na	OrderedLocusNames=At5g08680	na	Arabidopsis thaliana (Mouse-ear cress)
High	Master Protein	GLYMA_03G105300		K02134 - F-type H+-transporting ATPase subunit delta (ATPeF1D, ATP5D, ATP16) (1 of 2)	0	245.606	81	15	129	10	197	20.8	7.58	590	15	0	0.793	0.996833	62.81	112.6	87.4	13.73	14.83	High	High	High	High	High	High	1		3	3	Present Both	1	GLYMA_03G105300	GLYMA_03G105300	sp|Q96252|ATP4_ARATH	ATP synthase subunit delta', mitochondrial GN=ATL75	ident:136/197 pos:162/197 query:197 hit:203 align:182 bit:290.4	OK	ATP synthase subunit delta', mitochondrial	F-ATPase delta' subunit	ATP4_ARATH	Q96252	na	OrderedLocusNames=At5g47030	na	Arabidopsis thaliana (Mouse-ear cress)
High	Master Protein	GLYMA_07G117000		K02134 - F-type H+-transporting ATPase subunit delta (ATPeF1D, ATP5D, ATP16) (1 of 2)	0	274.39	81	16	147	11	197	20.8	7.58	661.26	16	7	0.954	0.999587	71.72	111	89	8	6.29	High	High	High	High	High	High	1		3	3	Present Both	1	GLYMA_07G117000	GLYMA_07G117000	sp|Q96252|ATP4_ARATH	ATP synthase subunit delta', mitochondrial GN=ATL75	ident:139/197 pos:161/197 query:197 hit:203 align:182 bit:292.7	OK	ATP synthase subunit delta', mitochondrial	F-ATPase delta' subunit	ATP4_ARATH	Q96252	na	OrderedLocusNames=At5g47030	na	Arabidopsis thaliana (Mouse-ear cress)
High	Master Protein	GLYMA_07G003700		K02135 - F-type H+-transporting ATPase subunit epsilon (ATPeF1E, ATP5E, ATP15) (1 of 1)	0	25.786	39	3	17	3	70	7.9	8.91	50.21	3	0	1.43	0.862691	49.03	82.1	117.9	50.16	16.23	High	High	High	High	High	High	1		3	3	Present Both	1	GLYMA_07G003700	GLYMA_07G003700	sp|Q96253|ATP5E_ARATH	ATP synthase subunit epsilon, mitochondrial GN=BLI	ident:54/70 pos:64/70 query:70 hit:70 align:69 bit:125.6	OK	ATP synthase subunit epsilon, mitochondrial (ATPase subunit epsilon)	na	ATP5E_ARATH	Q96253	na	OrderedLocusNames=At1g51650	na	Arabidopsis thaliana (Mouse-ear cress)
High	Master Protein	GLYMA_06G203200		K02136 - F-type H+-transporting ATPase subunit gamma (ATPeF1G, ATP5C1, ATP3) (1 of 2)	0	91.033	32	11	43	3	324	35.4	9.06	111.21	11	9	0.775	0.996833	47.73	110.4	89.6	10.49	74.65	High	High	High	High	High	High	1		3	3	Present Both	1	GLYMA_06G203200	GLYMA_06G203200	sp|Q96250|ATPG3_ARATH	ATP synthase subunit gamma, mitochondrial GN=ATPC	ident:262/324 pos:288/324 query:324 hit:325 align:329 bit:528.9	OK	ATP synthase subunit gamma, mitochondrial	F-ATPase gamma subunit	ATPG3_ARATH	Q96250	Q7GB12	ATPC	na	Arabidopsis thaliana (Mouse-ear cress)
High	Master Protein	GLYMA_08G155200		K02137 - F-type H+-transporting ATPase subunit O (ATPeF0O, ATP5O, ATP5) (1 of 2)	0	147.246	58	15	80	1	245	26.9	9.52	238.66	15	0	1.001	0.996833	121.03	64.3	135.7	64.81	64.19	High	High	High	High	High	High	1		3	3	Present Both	1	GLYMA_08G155200	GLYMA_08G155200	sp|Q96251|ATPO_ARATH	ATP synthase subunit O, mitochondrial GN=atpH	ident:132/245 pos:182/245 query:245 hit:238 align:243 bit:273.9	OK	ATP synthase subunit O, mitochondrial	Oligomycin sensitivity conferral protein (OSCP)	ATPO_ARATH	Q96251	Q93W68; Q9LYR1	OrderedLocusNames=At5g13450	na	Arabidopsis thaliana (Mouse-ear cress)
High	Master Protein	GLYMA_15G273900		K02137 - F-type H+-transporting ATPase subunit O (ATPeF0O, ATP5O, ATP5) (1 of 2)	0	159.825	60	16	79	2	245	26.9	9.44	240.01	16	14	1.167	0.996833	75.43	76.1	123.9	37.01	27.89	High	High	High	High	High	Peak Found	1		3	3	Present Both	1	GLYMA_15G273900	GLYMA_15G273900	sp|Q96251|ATPO_ARATH	ATP synthase subunit O, mitochondrial GN=atpH	ident:135/245 pos:181/245 query:245 hit:238 align:243 bit:278.9	OK	ATP synthase subunit O, mitochondrial	Oligomycin sensitivity conferral protein (OSCP)	ATPO_ARATH	Q96251	Q93W68; Q9LYR1	OrderedLocusNames=At5g13450	na	Arabidopsis thaliana (Mouse-ear cress)
High	Master Protein	GLYMA_10G213400		K02138 - F-type H+-transporting ATPase subunit d (ATPeF0D, ATP5H, ATP7) (1 of 2)	0	397.396	92	35	251	13	168	19.9	5.2	782.5	35	25	1.238	0.970114	76.53	59.3	140.7	74.51	45.69	High	High	High	High	High	High	1		3	3	Present Both	1	GLYMA_10G213400	GLYMA_10G213400	sp|Q9FT52|ATP5H_ARATH	ATP synthase subunit d, mitochondrial GN=ATL31	ident:139/168 pos:154/168 query:168 hit:168 align:168 bit:294.7	OK	ATP synthase subunit d, mitochondrial (ATPase subunit d)	na	ATP5H_ARATH	Q9FT52	Q8RW89; Q8W039	OrderedLocusNames=At3g52300	na	Arabidopsis thaliana (Mouse-ear cress)
High	Master Protein	GLYMA_20G177700		K02138 - F-type H+-transporting ATPase subunit d (ATPeF0D, ATP5H, ATP7) (1 of 2)	0	390.985	93	35	256	13	168	19.9	5.29	817.76	35	0	1.301	0.946051	99.96	53.6	146.4	96.98	49.99	High	High	High	High	High	High	1		3	3	Present Both	1	GLYMA_20G177700	GLYMA_20G177700	sp|Q9FT52|ATP5H_ARATH	ATP synthase subunit d, mitochondrial GN=ATL31	ident:143/168 pos:157/168 query:168 hit:168 align:168 bit:301.6	OK	ATP synthase subunit d, mitochondrial (ATPase subunit d)	na	ATP5H_ARATH	Q9FT52	Q8RW89; Q8W039	OrderedLocusNames=At3g52300	na	Arabidopsis thaliana (Mouse-ear cress)
High	Master Protein	GLYMA_07G002300		K02145 - V-type H+-transporting ATPase subunit A (ATPeV1A, ATP6A) (1 of 2)	0	576.697	54	31	286	3	623	68.7	5.5	1131.8	31	0	0.538	0.677838	14.36	139	61	46.29	5.92	High	High	High	High	High	High	1		3	3	Present Both	1	GLYMA_07G002300	GLYMA_07G002300	sp|O23654|VATA_ARATH	V-type proton ATPase catalytic subunit A GN=VHA-A	ident:581/623 pos:599/623 query:623 hit:623 align:623 bit:1209.1	OK	V-type proton ATPase catalytic subunit A (V-ATPase subunit A)	V-ATPase 69 kDa subunit; Vacuolar H(+)-ATPase subunit A; Vacuolar proton pump subunit alpha	VATA_ARATH	O23654	na	VHA-A	na	Arabidopsis thaliana (Mouse-ear cress)
High	Master Protein	GLYMA_08G224400		K02145 - V-type H+-transporting ATPase subunit A (ATPeV1A, ATP6A) (1 of 2)	0	564.35	54	34	276	6	623	68.7	5.67	1107.24	34	32	1.282	0.95401	53.58	102	98	9.36	12.38	High	High	High	High	High	High	1		3	3	Present Both	1	GLYMA_08G224400	GLYMA_08G224400	sp|O23654|VATA_ARATH	V-type proton ATPase catalytic subunit A GN=VHA-A	ident:580/623 pos:599/623 query:623 hit:623 align:623 bit:1208.4	OK	V-type proton ATPase catalytic subunit A (V-ATPase subunit A)	V-ATPase 69 kDa subunit; Vacuolar H(+)-ATPase subunit A; Vacuolar proton pump subunit alpha	VATA_ARATH	O23654	na	VHA-A	na	Arabidopsis thaliana (Mouse-ear cress)
High	Master Protein	GLYMA_09G245700		K02147 - V-type H+-transporting ATPase subunit B (ATPeV1B, ATP6B) (1 of 4)	0	439.313	67	33	194	33	489	54.1	5.06	696.38	33	0	1.032	0.996833	61.39	104.8	95.2	17.85	20.69	High	High	High	High	High	High	1		3	3	Present Both	1	GLYMA_09G245700	GLYMA_09G245700	sp|Q9SZN1|VATB2_ARATH	V-type proton ATPase subunit B2 GN=VHA-B2	ident:470/489 pos:479/489 query:489 hit:487 align:489 bit:954.1	OK	V-type proton ATPase subunit B2 (V-ATPase subunit B2)	Vacuolar H(+)-ATPase subunit B isoform 2; Vacuolar proton pump subunit B2	VATB2_ARATH	Q9SZN1	B9DGU0; B9DHP3; Q56W88; Q94AY7	VHA-B2	na	Arabidopsis thaliana (Mouse-ear cress)
High	Master Protein	GLYMA_16G050200		K02148 - V-type H+-transporting ATPase subunit C (ATPeV1C, ATP6C) (1 of 4)	0	96.837	47	16	62	3	384	43.7	6.15	188.49	16	0	0.929	0.996833	33.19	76.2	123.8	43.96	52.17	High	High	High	High	High	High	1		3	3	Present Both	1	GLYMA_16G050200	GLYMA_16G050200	sp|Q9SDS7|VATC_ARATH	V-type proton ATPase subunit C GN=VHA-C	ident:310/384 pos:344/384 query:384 hit:375 align:376 bit:656.8	OK	V-type proton ATPase subunit C (V-ATPase subunit C)	Vacuolar H(+)-ATPase subunit C; Vacuolar proton pump subunit C	VATC_ARATH	Q9SDS7	na	VHA-C	DET3; VATC	Arabidopsis thaliana (Mouse-ear cress)
High	Master Protein	GLYMA_16G146600		K02148 - V-type H+-transporting ATPase subunit C (ATPeV1C, ATP6C) (1 of 4)	0	83.314	47	15	48	4	375	42.5	5.41	141.89	15	0	0.928	0.996833	62.27	95	105	26.32	57.72	High	High	High	High	High	High	1		3	3	Present Both	1	GLYMA_16G146600	GLYMA_16G146600	sp|Q9SDS7|VATC_ARATH	V-type proton ATPase subunit C GN=VHA-C	ident:305/375 pos:346/375 query:375 hit:375 align:374 bit:656.0	OK	V-type proton ATPase subunit C (V-ATPase subunit C)	Vacuolar H(+)-ATPase subunit C; Vacuolar proton pump subunit C	VATC_ARATH	Q9SDS7	na	VHA-C	DET3; VATC	Arabidopsis thaliana (Mouse-ear cress)
High	Master Protein	GLYMA_19G101000		K02148 - V-type H+-transporting ATPase subunit C (ATPeV1C, ATP6C) (1 of 4)	0	111.256	53	17	68	3	377	42.8	6.09	224.62	17	12	1.147	0.996833	91.31	65.4	134.6	73.37	39.55	High	High	High	High	High	High	1		3	3	Present Both	1	GLYMA_19G101000	GLYMA_19G101000	sp|Q9SDS7|VATC_ARATH	V-type proton ATPase subunit C GN=VHA-C	ident:316/377 pos:347/377 query:377 hit:375 align:377 bit:659.4	OK	V-type proton ATPase subunit C (V-ATPase subunit C)	Vacuolar H(+)-ATPase subunit C; Vacuolar proton pump subunit C	VATC_ARATH	Q9SDS7	na	VHA-C	DET3; VATC	Arabidopsis thaliana (Mouse-ear cress)
High	Master Protein	GLYMA_05G135300		K02151 - V-type H+-transporting ATPase subunit F (ATPeV1F, ATP6S14) (1 of 2)	0	225.675	97	16	122	16	130	14.5	6.57	470.13	16	0	1.534	0.786682	56.99	91.6	108.4	9.67	4.66	High	High	High	High	High	High	1		3	3	Present Both	1	GLYMA_05G135300	GLYMA_05G135300	sp|Q9ZQX4|VATF_ARATH	V-type proton ATPase subunit F GN=VHA-F	ident:109/130 pos:119/130 query:130 hit:128 align:126 bit:231.9	OK	V-type proton ATPase subunit F (V-ATPase subunit F)	V-ATPase 14 kDa subunit; Vacuolar H(+)-ATPase subunit F; Vacuolar proton pump subunit F	VATF_ARATH	Q9ZQX4	na	VHA-F	VATF	Arabidopsis thaliana (Mouse-ear cress)
High	Master Protein	GLYMA_03G180700		K02152 - V-type H+-transporting ATPase subunit G (ATPeV1G, ATP6G) (1 of 4)	0	210.947	80	14	139	5	110	12.3	7.5	562.15	14	0	1.317	0.945815	66.64	85.8	114.2	30.78	12.71	High	High	High	High	High	High	1		3	3	Present Both	1	GLYMA_03G180700	GLYMA_03G180700	sp|O82628|VATG1_ARATH	V-type proton ATPase subunit G1 GN=VHA-G1	ident:84/110 pos:94/110 query:110 hit:110 align:110 bit:142.5	OK	V-type proton ATPase subunit G1 (V-ATPase subunit G1)	Vacuolar H(+)-ATPase subunit G isoform 1; Vacuolar proton pump subunit G1	VATG1_ARATH	O82628	na	VHA-G1	AVMA10; VAG1; VATG1; VMA10	Arabidopsis thaliana (Mouse-ear cress)
High	Master Protein	GLYMA_10G052700		K02152 - V-type H+-transporting ATPase subunit G (ATPeV1G, ATP6G) (1 of 4)	0	310.024	85	21	197	9	110	12.2	7.42	775.94	21	13	1.041	0.996833	63.99	98.5	101.5	14.58	14.53	High	High	High	High	High	High	1		3	3	Present Both	1	GLYMA_10G052700	GLYMA_10G052700	sp|O82628|VATG1_ARATH	V-type proton ATPase subunit G1 GN=VHA-G1	ident:83/110 pos:96/110 query:110 hit:110 align:110 bit:144.8	OK	V-type proton ATPase subunit G1 (V-ATPase subunit G1)	Vacuolar H(+)-ATPase subunit G isoform 1; Vacuolar proton pump subunit G1	VATG1_ARATH	O82628	na	VHA-G1	AVMA10; VAG1; VATG1; VMA10	Arabidopsis thaliana (Mouse-ear cress)
High	Master Protein	GLYMA_13G139900		K02152 - V-type H+-transporting ATPase subunit G (ATPeV1G, ATP6G) (1 of 4)	0	314.971	91	20	183	3	110	12.2	6.58	714.14	20	5	0.913	0.996833	91.13	95.6	104.4	16.53	0.87	High	High	High	Peak Found	High	High	1		3	3	Present Both	1	GLYMA_13G139900	GLYMA_13G139900	sp|O82628|VATG1_ARATH	V-type proton ATPase subunit G1 GN=VHA-G1	ident:82/110 pos:95/110 query:110 hit:110 align:110 bit:139.8	OK	V-type proton ATPase subunit G1 (V-ATPase subunit G1)	Vacuolar H(+)-ATPase subunit G isoform 1; Vacuolar proton pump subunit G1	VATG1_ARATH	O82628	na	VHA-G1	AVMA10; VAG1; VATG1; VMA10	Arabidopsis thaliana (Mouse-ear cress)
High	Master Protein	GLYMA_11G113400		K02154 - V-type H+-transporting ATPase subunit a (ATPeV0A, ATP6N) (1 of 7)	0	119.399	19	12	53	10	818	92.9	6.18	159.32	12	3	1.414	0.869766	40.39	91.4	108.6	26.21	3.88	High	High	High	High	High	High	1		3	3	Present Both	1	GLYMA_11G113400	GLYMA_11G113400	sp|Q8W4S4|VHAA3_ARATH	V-type proton ATPase subunit a3 GN=VHA-a3	ident:633/818 pos:730/818 query:818 hit:821 align:808 bit:1317.8	OK	V-type proton ATPase subunit a3 (V-ATPase subunit a3)	V-type proton ATPase 95 kDa subunit a isoform 3 (V-ATPase 95 kDa isoform a3); Vacuolar H(+)-ATPase subunit a isoform 3; Vacuolar proton pump subunit a3; Vacuolar proton translocating ATPase 95 kDa subunit a isoform 3	VHAA3_ARATH	Q8W4S4	Q0WLI9; Q42216; Q56WQ9; Q9SVI5	VHA-a3	na	Arabidopsis thaliana (Mouse-ear cress)
High	Master Protein	GLYMA_12G082300		K02219 - cyclin-dependent kinase regulatory subunit CKS1 (CKS1) (1 of 3)	0	9.737	31	3	11	3	88	10.6	9.09	13.92	3	0	0.759	0.988182	10.76	111.7	88.3	19.72	17.95	High	High	High	High	High	Peak Found	1		3	3	Present Both	1	GLYMA_12G082300	GLYMA_12G082300	sp|O23249|CKS1_ARATH	Cyclin-dependent kinases regulatory subunit 1 GN=CKS1	ident:84/88 pos:87/88 query:88 hit:87 align:88 bit:174.1	OK	Cyclin-dependent kinases regulatory subunit 1	CKS1-At	CKS1_ARATH	O23249	na	CKS1	na	Arabidopsis thaliana (Mouse-ear cress)
High	Master Protein	GLYMA_17G157000		K02266 - cytochrome c oxidase subunit 6a (COX6A) (1 of 2)	0	76.86	36	5	38	1	102	11.6	9.35	129.86	5	0	0.4	0.267372	1.39	142.9	57.1	8.27		High	High	Not Found	Not Found	Not Found	High	1		2	1	Only Control	1	GLYMA_17G157000	GLYMA_17G157000	sp|Q9T070|COX6A_ARATH	Cytochrome c oxidase subunit 6a, mitochondrial GN=COX6A	ident:70/102 pos:81/102 query:102 hit:102 align:102 bit:154.5	OK	Cytochrome c oxidase subunit 6a, mitochondrial (AtCOX6a)	na	COX6A_ARATH	Q9T070	Q8L974	COX6A	na	Arabidopsis thaliana (Mouse-ear cress)
High	Master Protein	GLYMA_13G090900		K02267 - cytochrome c oxidase subunit 6b (COX6B) (1 of 5)	0	23.112	45	5	37	4	77	9.1	7.21	71.58	5	0	1.234	0.970114	76.47	79.2	120.8	61.52	9.65	High	High	High	High	High	High	1		3	3	Present Both	1	GLYMA_13G090900	GLYMA_13G090900	sp|Q945L0|CX6B2_ARATH	Cytochrome c oxidase subunit 6b-2 GN=COX6B-2	ident:67/77 pos:71/77 query:77 hit:78 align:75 bit:147.5	OK	Cytochrome c oxidase subunit 6b-2 (AtCOX6b-2)	na	CX6B2_ARATH	Q945L0	Q8LD51	COX6B-2	na	Arabidopsis thaliana (Mouse-ear cress)
High	Master Protein	GLYMA_05G041900		K02358 - elongation factor Tu (tuf, TUFM) (1 of 8)	0	20.84	10	3	5	3	479	52.5	6.81	16.62	3	0	0.386	0.232569	2.26	142.3	57.7	13.12	40.21	High	Peak Found	High	Peak Found	High	High	1		3	3	Present Both	1	GLYMA_05G041900	GLYMA_05G041900	sp|P17745|EFTU_ARATH	Elongation factor Tu, chloroplastic GN=TUFA	ident:388/479 pos:424/479 query:479 hit:476 align:460 bit:775.0	OK	Elongation factor Tu, chloroplastic (EF-Tu)	Ras-related protein RABE1b (AtRABE1b); Ras-related protein Rab8D (AtRab8D)	EFTU_ARATH	P17745	Q8GTE7	TUFA	RAB8D; RABE1B	Arabidopsis thaliana (Mouse-ear cress)
High	Master Protein	GLYMA_05G019600		K02518 - translation initiation factor IF-1 (infA) (1 of 2)	0	4.743	11	1	1	1	143	16	10.27	2.92	1	0	1.954	0.456901	50.18	67.7	132.3	59.3	10.93	High	Peak Found	Peak Found	Peak Found	Peak Found	Not Found	1		3	2	Present Both	1	GLYMA_05G019600	GLYMA_05G019600	sp|O82499|IF1C_ARATH	Translation initiation factor IF-1, chloroplastic GN=IDD5	ident:64/143 pos:79/143 query:143 hit:141 align:134 bit:113.6	Poor_match	Translation initiation factor IF-1, chloroplastic	na	IF1C_ARATH	O82499	Q56YK9; Q8GY59; Q9T016	OrderedLocusNames=At4g11175	na	Arabidopsis thaliana (Mouse-ear cress)
High	Master Protein	GLYMA_18G141900		K02575 - MFS transporter, NNP family, nitrate/nitrite transporter (NRT, narK, nrtP, nasA) (1 of 5)	0	17.766	3	1	10	1	510	55.5	9.2	32.83	1	0	0.735	0.970114	30.38	128.3	71.7	40.65	26.08	High	High	High	High	High	High	1		3	3	Present Both	1	GLYMA_18G141900	GLYMA_18G141900	sp|Q9LPV5|NRT25_ARATH	High affinity nitrate transporter 2.5 GN=NRT2.5	ident:365/510 pos:420/510 query:510 hit:502 align:484 bit:771.2	OK	High affinity nitrate transporter 2.5 (AtNRT2:5)	na	NRT25_ARATH	Q9LPV5	na	NRT2.5	na	Arabidopsis thaliana (Mouse-ear cress)
High	Master Protein	GLYMA_10G249000		K02692 - photosystem I subunit II (psaD) (1 of 2)	0	45.141	42	8	15	8	210	23	9.61	29.5	8	0	1.146	0.996833	108.35	73.1	126.9	131.83	2.01	High	Peak Found	High	High	High	High	1		3	3	Present Both	1	GLYMA_10G249000	GLYMA_10G249000	sp|Q9SA56|PSAD2_ARATH	Photosystem I reaction center subunit II-2, chloroplastic GN=PSAD2	ident:156/210 pos:174/210 query:210 hit:204 align:210 bit:306.2	OK	Photosystem I reaction center subunit II-2, chloroplastic	Photosystem I 20 kDa subunit 2 (PSI-D2)	PSAD2_ARATH	Q9SA56	Q9SUI3	PSAD2	na	Arabidopsis thaliana (Mouse-ear cress)
High	Master Protein	GLYMA_10G042000		K02693 - photosystem I subunit IV (psaE) (1 of 4)	0	35.953	26	3	13	3	172	18.7	9.99	47.47	3	0	0.582	0.764107	42.77	150.4	49.6	167.29	71.27	High	High	Peak Found	Peak Found	High	High	1		3	3	Present Both	1	GLYMA_10G042000	GLYMA_10G042000	sp|Q9S714|PSAE2_ARATH	Photosystem I reaction center subunit IV B, chloroplastic GN=PSAE2	ident:84/172 pos:103/172 query:172 hit:145 align:143 bit:132.1	Poor_match	Photosystem I reaction center subunit IV B, chloroplastic (PSI-E B)	na	PSAE2_ARATH	Q9S714	na	PSAE2	na	Arabidopsis thaliana (Mouse-ear cress)
High	Master Protein	GLYMA_07G019700		K02695 - photosystem I subunit VI (psaH) (1 of 5)	0	54.614	39	3	4	2	150	15.9	9.91	24.72	3	1	0.01	1.31e-16		200		140.12		High	Peak Found	Not Found	Not Found	Not Found	Not Found	1		2	0	Only Control	1	GLYMA_07G019700	GLYMA_07G019700	sp|Q9SUI6|PSAH2_ARATH	Photosystem I reaction center subunit VI-2, chloroplastic GN=PSAH2	ident:118/150 pos:128/150 query:150 hit:145 align:151 bit:231.5	OK	Photosystem I reaction center subunit VI-2, chloroplastic	PSI-H1	PSAH2_ARATH	Q9SUI6	na	PSAH2	na	Arabidopsis thaliana (Mouse-ear cress)
High	Master Protein	GLYMA_13G357300		K02695 - photosystem I subunit VI (psaH) (1 of 5)	0	46.06	42	3	4	2	139	14.8	9.99	20.39	3	0	0.01	1.31e-16		200				High	Not Found	Not Found	Not Found	Not Found	Not Found	1		1	0	Missing Both	1	GLYMA_13G357300	GLYMA_13G357300	sp|Q9SUI6|PSAH2_ARATH	Photosystem I reaction center subunit VI-2, chloroplastic GN=PSAH2	ident:114/139 pos:126/139 query:139 hit:145 align:145 bit:223.0	OK	Photosystem I reaction center subunit VI-2, chloroplastic	PSI-H1	PSAH2_ARATH	Q9SUI6	na	PSAH2	na	Arabidopsis thaliana (Mouse-ear cress)
High	Master Protein	GLYMA_15G016300		K02695 - photosystem I subunit VI (psaH) (1 of 5)	0	31.354	42	2	3	1	139	14.9	9.99	15.22	2	0	0.01	1.31e-16		200				High	Not Found	Not Found	Not Found	Not Found	Not Found	1		1	0	Missing Both	1	GLYMA_15G016300	GLYMA_15G016300	sp|Q9SUI6|PSAH2_ARATH	Photosystem I reaction center subunit VI-2, chloroplastic GN=PSAH2	ident:113/139 pos:126/139 query:139 hit:145 align:145 bit:223.0	OK	Photosystem I reaction center subunit VI-2, chloroplastic	PSI-H1	PSAH2_ARATH	Q9SUI6	na	PSAH2	na	Arabidopsis thaliana (Mouse-ear cress)
High	Master Protein	GLYMA_01G180800		K02716 - photosystem II oxygen-evolving enhancer protein 1 (psbO) (1 of 4)	0	167.174	57	23	72	4	329	34.8	6.77	194.91	23	4	0.564	0.740517	41.51	106.3	93.7	156.46	58.22	High	High	High	High	High	Peak Found	1		3	3	Present Both	1	GLYMA_01G180800	GLYMA_01G180800	sp|Q9S841|PSBO2_ARATH	Oxygen-evolving enhancer protein 1-2, chloroplastic GN=PSBO2	ident:259/329 pos:295/329 query:329 hit:331 align:331 bit:535.4	OK	Oxygen-evolving enhancer protein 1-2, chloroplastic (OEE1)	33 kDa subunit of oxygen evolving system of photosystem II; 33 kDa thylakoid membrane protein; Manganese-stabilizing protein 2 (MSP-2); OEC 33 kDa subunit	PSBO2_ARATH	Q9S841	na	PSBO2	na	Arabidopsis thaliana (Mouse-ear cress)
High	Master Protein	GLYMA_02G061100		K02716 - photosystem II oxygen-evolving enhancer protein 1 (psbO) (1 of 4)	0	158.261	57	23	63	6	326	34.6	6.32	172.49	23	16	0.556	0.722803	36.5	100.6	99.4	157.65	54.79	High	Not Found	Not Found	Not Found	Not Found	Not Found	1		1	0	Missing Both	1	GLYMA_02G061100	GLYMA_02G061100	sp|Q9S841|PSBO2_ARATH	Oxygen-evolving enhancer protein 1-2, chloroplastic GN=PSBO2	ident:258/326 pos:292/326 query:326 hit:331 align:332 bit:533.9	OK	Oxygen-evolving enhancer protein 1-2, chloroplastic (OEE1)	33 kDa subunit of oxygen evolving system of photosystem II; 33 kDa thylakoid membrane protein; Manganese-stabilizing protein 2 (MSP-2); OEC 33 kDa subunit	PSBO2_ARATH	Q9S841	na	PSBO2	na	Arabidopsis thaliana (Mouse-ear cress)
High	Master Protein	GLYMA_11G061300		K02716 - photosystem II oxygen-evolving enhancer protein 1 (psbO) (1 of 4)	0	179.779	57	23	64	5	329	34.8	5.67	183.08	23	0	0.092	9.03e-07	0.05	176.2	23.8	138.54	68.5	High	High	Not Found	High	High	High	1		2	3	Present Both	1	GLYMA_11G061300	GLYMA_11G061300	sp|P23321|PSBO1_ARATH	Oxygen-evolving enhancer protein 1-1, chloroplastic GN=PSBO1	ident:260/329 pos:294/329 query:329 hit:332 align:332 bit:540.4	OK	Oxygen-evolving enhancer protein 1-1, chloroplastic (OEE1)	33 kDa subunit of oxygen evolving system of photosystem II; 33 kDa thylakoid membrane protein; Manganese-stabilizing protein 1 (MSP-1); OEC 33 kDa subunit	PSBO1_ARATH	P23321	O81917; Q41998; Q8L7F1; Q8LAT1; Q93Y28; Q93ZP8; Q94JV7	PSBO1	PSBO	Arabidopsis thaliana (Mouse-ear cress)
High	Master Protein	GLYMA_14G073000		K02725 - 20S proteasome subunit alpha 6 (PSMA1) (1 of 3)	0	15.836	13	3	10	3	288	31.1	5.27	18.44	3	0	0.848	0.996833	10.77	149.2	50.8	50.26	65.52	High	High	High	High	High	High	1		3	3	Present Both	1	GLYMA_14G073000	GLYMA_14G073000	sp|P34066|PSA1A_ARATH	Proteasome subunit alpha type-1-A GN=PAF1	ident:206/288 pos:225/288 query:288 hit:278 align:238 bit:444.1	OK	Proteasome subunit alpha type-1-A	20S proteasome alpha subunit F-1; Proteasome 30 kDa subunit; Proteasome component 2A (AtPSM30); Proteasome subunit alpha type-6; Protein ARSENIC TOLERANCE 5	PSA1A_ARATH	P34066	O81150; Q8LF69	PAF1	ARS5; PRC2A; PRS1; PSM30	Arabidopsis thaliana (Mouse-ear cress)
High	Master Protein	GLYMA_16G126200		K02731 - 20S proteasome subunit alpha 4 (PSMA7) (1 of 3)	0	59.685	38	7	22	7	249	27.2	7.44	67.72	7	0	0.879	0.996833	51.59	89.4	110.6	46.9	48.99	High	High	High	High	High	High	1		3	3	Present Both	1	GLYMA_16G126200	GLYMA_16G126200	sp|O24616|PSA7B_ARATH	Proteasome subunit alpha type-7-B GN=PAD2	ident:230/249 pos:242/249 query:249 hit:250 align:250 bit:445.3	OK	Proteasome subunit alpha type-7-B	20S proteasome alpha subunit D-2; Proteasome component 6B; Proteasome component 6C; Proteasome subunit alpha type-4	PSA7B_ARATH	O24616	Q0WTK1; Q84W05	PAD2	PRC6B; PRC6C; PRS1	Arabidopsis thaliana (Mouse-ear cress)
High	Master Protein	GLYMA_09G228500		K03008 - DNA-directed RNA polymerase II subunit RPB11 (RPB11, POLR2J) (1 of 3)	0	18.669	32	4	12	4	116	13.6	7.64	22.77	4	0	0.904	0.996833	37.26	148.9	51.1	31.01	54.47	High	High	High	High	High	High	1		3	3	Present Both	1	GLYMA_09G228500	GLYMA_09G228500	sp|Q38859|NRPBB_ARATH	DNA-directed RNA polymerases II, IV and V subunit 11 GN=NRPB11	ident:98/116 pos:111/116 query:116 hit:116 align:116 bit:213.4	OK	DNA-directed RNA polymerases II, IV and V subunit 11	DNA-directed RNA polymerase II 13.6 kDa polypeptide; DNA-directed RNA polymerase II subunit J; DNA-directed RNA polymerase II subunit RPB11 (RNA polymerase II subunit B11)	NRPBB_ARATH	Q38859	na	NRPB11	NRPD11; NRPE11; RPB13.6	Arabidopsis thaliana (Mouse-ear cress)
High	Master Protein	GLYMA_10G234800		K03023 - DNA-directed RNA polymerase III subunit RPC3 (RPC3, POLR3C) (1 of 3)	0.001	2.723	2	1	21	1	518	59.3	8.03	37.86	1	0	0.937	0.996833	11.25	104.8	95.2	8.6	10.63	High	High	High	High	High	High	1		3	3	Present Both	1	GLYMA_10G234800	GLYMA_10G234800	sp|Q9M302|PP270_ARATH	Pentatricopeptide repeat-containing protein At3g48810 GN=PCMP-H76	ident:53/518 pos:88/518 query:518 hit:659 align:206 bit:33.5	Partial_match_both	Pentatricopeptide repeat-containing protein At3g48810	na	PP270_ARATH	Q9M302	na	OrderedLocusNames=At3g48810	na	Arabidopsis thaliana (Mouse-ear cress)
High	Master Protein	GLYMA_06G289400		K03028 - 26S proteasome regulatory subunit N1 (PSMD2, RPN1) (1 of 2)	0	42.95	7	4	13	4	885	97.3	5.19	44.07	4	0	0.43	0.365149	16.34	179.2	20.8	67.62	79.42	High	High	High	Peak Found	High	High	1		3	3	Present Both	1	GLYMA_06G289400	GLYMA_06G289400	sp|Q9SIV2|PSD2A_ARATH	26S proteasome non-ATPase regulatory subunit 2 homolog A GN=RPN1A	ident:750/885 pos:833/885 query:885 hit:891 align:896 bit:1517.7	OK	26S proteasome non-ATPase regulatory subunit 2 homolog A	26S proteasome regulatory subunit RPN1a (AtRPN1a); 26S proteasome regulatory subunit S2 homolog A	PSD2A_ARATH	Q9SIV2	Q56ZR0; Q9C5J1	RPN1A	na	Arabidopsis thaliana (Mouse-ear cress)
High	Master Protein	GLYMA_08G048800		K03032 - 26S proteasome regulatory subunit N2 (PSMD1, RPN2) (1 of 2)	0	38.263	7	4	25	4	1006	109.5	5.36	59.92	4	0	0.725	0.970114	38.95	135.1	64.9	53.77	29.27	High	High	High	High	High	High	1		3	3	Present Both	1	GLYMA_08G048800	GLYMA_08G048800	sp|O48844|PSD1A_ARATH	26S proteasome non-ATPase regulatory subunit 1 homolog A GN=RPN2A	ident:860/1006 pos:913/1006 query:1006 hit:1004 align:1009 bit:1703.0	OK	26S proteasome non-ATPase regulatory subunit 1 homolog A	26S proteasome regulatory subunit RPN2a (AtRPN2a); 26S proteasome regulatory subunit S1 homolog A	PSD1A_ARATH	O48844	Q570D7; Q6XJG7	RPN2A	na	Arabidopsis thaliana (Mouse-ear cress)
High	Master Protein	GLYMA_11G227700		K03038 - 26S proteasome regulatory subunit N8 (PSMD7, RPN8) (1 of 3)	0	11.749	13	3	4	3	309	34.8	6.28	8.01	3	0	0.406	0.28694	6.93	163.7	36.3	7.99	62.34	High	Peak Found	High	Peak Found	High	High	1		3	3	Present Both	1	GLYMA_11G227700	GLYMA_11G227700	sp|O24412|PSD7A_ARATH	26S proteasome non-ATPase regulatory subunit 7 homolog A GN=RPN8A	ident:278/309 pos:296/309 query:309 hit:308 align:308 bit:572.8	OK	26S proteasome non-ATPase regulatory subunit 7 homolog A	26S proteasome regulatory subunit RPN8a (AtRPN8a); Protein ASYMMETRIC LEAVES ENHANCER 3; Protein MOV34 (AtMOV34)	PSD7A_ARATH	O24412	Q6EMB3	RPN8A	AE3; MOV34	Arabidopsis thaliana (Mouse-ear cress)
High	Master Protein	GLYMA_03G170600		K03062 - 26S proteasome regulatory subunit T2 (PSMC1, RPT2) (1 of 6)	0	16.854	12	4	11	1	446	49.5	6.21	24.62	4	2	0.992	0.996833	38.14	105.4	94.6	39.31	5.87	High	High	High	High	High	High	1		3	3	Present Both	1	GLYMA_03G170600	GLYMA_03G170600	sp|Q9SZD4|PRS4A_ARATH	26S proteasome regulatory subunit 4 homolog A GN=RPT2A	ident:430/446 pos:439/446 query:446 hit:443 align:446 bit:864.0	OK	26S proteasome regulatory subunit 4 homolog A	26S proteasome AAA-ATPase subunit RPT2a; 26S proteasome subunit 4 homolog A; Protein HALTED ROOT; Regulatory particle triple-A ATPase subunit 2a	PRS4A_ARATH	Q9SZD4	Q9SEI5	RPT2A	HLR	Arabidopsis thaliana (Mouse-ear cress)
High	Master Protein	GLYMA_14G071000		K03064 - 26S proteasome regulatory subunit T4 (PSMC6, RPT4) (1 of 6)	0	41.866	22	7	19	6	399	44.6	8.19	47.44	7	0	0.916	0.996833	34.48	115.9	84.1	46.34	51.85	High	High	Peak Found	High	High	High	1		3	3	Present Both	1	GLYMA_14G071000	GLYMA_14G071000	sp|Q9SEI3|PS10A_ARATH	26S proteasome regulatory subunit 10B homolog A GN=RPT4A	ident:371/399 pos:386/399 query:399 hit:399 align:399 bit:763.1	OK	26S proteasome regulatory subunit 10B homolog A	26S proteasome AAA-ATPase subunit RPT4a; 26S proteasome subunit 10B homolog A; Regulatory particle triple-A ATPase subunit 4a	PS10A_ARATH	Q9SEI3	Q570H6	RPT4A	na	Arabidopsis thaliana (Mouse-ear cress)
High	Master Protein	GLYMA_10G151900		K03065 - 26S proteasome regulatory subunit T5 (PSMC3, RPT5) (1 of 4)	0	71.369	30	10	28	9	423	47.4	5.11	68.39	10	1	0.97	0.996833	59.13	134.3	65.7	39.36	69.41	High	High	High	High	High	High	1		3	3	Present Both	1	GLYMA_10G151900	GLYMA_10G151900	sp|Q9SEI2|PS6AA_ARATH	26S proteasome regulatory subunit 6A homolog A GN=RPT5A	ident:401/423 pos:418/423 query:423 hit:424 align:424 bit:825.5	OK	26S proteasome regulatory subunit 6A homolog A	26S proteasome AAA-ATPase subunit RPT5a; Proteasome 26S subunit 6A homolog A; Regulatory particle triple-A ATPase subunit 5a; Tat-binding protein 1 homolog A (TBP-1 homolog A)	PS6AA_ARATH	Q9SEI2	Q8H195; Q9SWY7	RPT5A	ATS6A.2; TBP1	Arabidopsis thaliana (Mouse-ear cress)
High	Master Protein	GLYMA_07G002200		K03066 - 26S proteasome regulatory subunit T6 (PSMC5, RPT6) (1 of 3)	0	69.871	29	9	20	8	418	47.1	8.76	61.47	9	0	0.892	0.996833	49.87	117	83	60.35	59.19	High	High	High	High	High	High	1		3	3	Present Both	1	GLYMA_07G002200	GLYMA_07G002200	sp|Q9C5U3|PRS8A_ARATH	26S proteasome regulatory subunit 8 homolog A GN=RPT6A	ident:386/418 pos:396/418 query:418 hit:419 align:419 bit:781.6	OK	26S proteasome regulatory subunit 8 homolog A	26S proteasome AAA-ATPase subunit RPT6a; 26S proteasome subunit 8 homolog A; Regulatory particle triple-A ATPase subunit 6a	PRS8A_ARATH	Q9C5U3	Q9SEI1	RPT6A	SUG1	Arabidopsis thaliana (Mouse-ear cress)
High	Master Protein	GLYMA_15G205900		K03098 - apolipoprotein D and lipocalin family protein (APOD) (1 of 4)	0	19.143	22	3	9	3	184	21.2	8.07	25.21	3	0	0.389	0.238631	11.76	166.9	33.1	47.83	75.47	High	High	High	Peak Found	High	High	1		3	3	Present Both	1	GLYMA_15G205900	GLYMA_15G205900	sp|Q9FGT8|TIL_ARATH	Temperature-induced lipocalin-1 GN=TIL	ident:130/184 pos:156/184 query:184 hit:186 align:181 bit:280.0	OK	Temperature-induced lipocalin-1 (AtTIL1)	na	TIL_ARATH	Q9FGT8	Q8LE12	TIL	na	Arabidopsis thaliana (Mouse-ear cress)
High	Master Protein	GLYMA_08G084800		K03189 - urease accessory protein (ureG) (1 of 1)	0	72.696	25	6	11	6	285	31.4	6.48	47.15	6	0	0.526	0.638435	14.69	183.5	16.5	65.43	103.15	High	High	High	Peak Found	Peak Found	High	1		3	3	Present Both	1	GLYMA_08G084800	GLYMA_08G084800	sp|O64700|UREG_ARATH	Urease accessory protein G GN=UREG	ident:224/285 pos:238/285 query:285 hit:275 align:254 bit:459.9	OK	Urease accessory protein G (AtUREG)	na	UREG_ARATH	O64700	Q9SYT8	UREG	na	Arabidopsis thaliana (Mouse-ear cress)
High	Master Protein	GLYMA_05G114900		K03231 - elongation factor 1-alpha (EEF1A) (1 of 8)	0	342.606	40	19	178	2	447	49.2	9.07	667.59	19	6	0.462	0.455595	13.56	134.8	65.2	40.29	9.17	High	High	High	High	High	High	1		3	3	Present Both	1	GLYMA_05G114900	GLYMA_05G114900	sp|Q8GTY0|EF1A4_ARATH	Elongation factor 1-alpha 4 GN=A4	ident:433/447 pos:440/447 query:447 hit:449 align:446 bit:899.0	OK	Elongation factor 1-alpha 4 (EF-1-alpha 4)	eEF-1A4	EF1A4_ARATH	Q8GTY0	P13905; Q0WSD5; Q39093; Q9C5L4	A4	na	Arabidopsis thaliana (Mouse-ear cress)
High	Master Protein	GLYMA_17G186600		K03231 - elongation factor 1-alpha (EEF1A) (1 of 8)	0	378.108	42	22	218	10	447	49.4	9.06	800.17	22	15	0.551	0.719803	23	128.1	71.9	34.97	30.21	High	High	High	High	High	High	1		3	3	Present Both	1	GLYMA_17G186600	GLYMA_17G186600	sp|Q8GTY0|EF1A4_ARATH	Elongation factor 1-alpha 4 GN=A4	ident:425/447 pos:439/447 query:447 hit:449 align:446 bit:884.8	OK	Elongation factor 1-alpha 4 (EF-1-alpha 4)	eEF-1A4	EF1A4_ARATH	Q8GTY0	P13905; Q0WSD5; Q39093; Q9C5L4	A4	na	Arabidopsis thaliana (Mouse-ear cress)
High	Master Protein	GLYMA_19G052400		K03231 - elongation factor 1-alpha (EEF1A) (1 of 8)	0	341.71	40	19	207	1	447	49.2	9.07	780.69	19	0	0.189	0.00225566	0.24	168.3	31.7	70.34		High	High	High	High	High	High	1		3	3	Present Both	1	GLYMA_19G052400	GLYMA_19G052400	sp|Q8GTY0|EF1A4_ARATH	Elongation factor 1-alpha 4 GN=A4	ident:433/447 pos:440/447 query:447 hit:449 align:446 bit:897.9	OK	Elongation factor 1-alpha 4 (EF-1-alpha 4)	eEF-1A4	EF1A4_ARATH	Q8GTY0	P13905; Q0WSD5; Q39093; Q9C5L4	A4	na	Arabidopsis thaliana (Mouse-ear cress)
High	Master Protein	GLYMA_19G078900		K03231 - elongation factor 1-alpha (EEF1A) (1 of 8)	0	149.766	45	6	124	1	154	16.9	9.23	438.38	6	0	0.284	0.0480393	3.92	155.7	44.3	53.28	24.07	High	High	High	High	High	High	1		3	3	Present Both	1	GLYMA_19G078900	GLYMA_19G078900	sp|Q8GTY0|EF1A4_ARATH	Elongation factor 1-alpha 4 GN=A4	ident:141/154 pos:148/154 query:154 hit:449 align:182 bit:271.6	Partial_match_hit	Elongation factor 1-alpha 4 (EF-1-alpha 4)	eEF-1A4	EF1A4_ARATH	Q8GTY0	P13905; Q0WSD5; Q39093; Q9C5L4	A4	na	Arabidopsis thaliana (Mouse-ear cress)
High	Master Protein	GLYMA_04G195100		K03232 - elongation factor 1-beta (EEF1B) (1 of 5)	0	45.735	25	7	36	6	230	25	4.56	103.11	7	0	0.638	0.86514	33.46	151	49	55.22	61.78	High	High	High	High	High	High	1		3	3	Present Both	1	GLYMA_04G195100	GLYMA_04G195100	sp|Q9SI20|EF1D2_ARATH	Elongation factor 1-delta 2 GN=EDL1	ident:183/230 pos:203/230 query:230 hit:231 align:226 bit:325.1	OK	Elongation factor 1-delta 2 (EF-1-delta 2)	Elongation factor 1B-beta 2; eEF-1B beta 2	EF1D2_ARATH	Q9SI20	Q7GA96; Q8LB45	OrderedLocusNames=At2g18110	na	Arabidopsis thaliana (Mouse-ear cress)
High	Master Protein	GLYMA_13G073200		K03232 - elongation factor 1-beta (EEF1B) (1 of 5)	0	64.605	32	7	23	6	224	24.2	4.65	73.6	7	0	0.702	0.950125	32.23	137.8	62.2	50.59	7.14	High	High	High	High	High	High	1		3	3	Present Both	1	GLYMA_13G073200	GLYMA_13G073200	sp|Q84WM9|EF1B1_ARATH	Elongation factor 1-beta 1 GN=A3	ident:164/224 pos:187/224 query:224 hit:228 align:228 bit:304.3	OK	Elongation factor 1-beta 1 (EF-1-beta 1)	Elongation factor 1-beta' 1 (EF-1-beta' 1); Elongation factor 1B-alpha 1; eEF-1B alpha 1	EF1B1_ARATH	Q84WM9	Q9SCX2; Q9SCX4	OrderedLocusNames=At5g12110	na	Arabidopsis thaliana (Mouse-ear cress)
High	Master Protein	GLYMA_08G170000		K03234 - elongation factor 2 (EEF2) (1 of 3)	0	277.665	30	24	122	24	843	94	6.11	445.2	24	0	0.499	0.560635	16.8	126.4	73.6	30.06	11.3	High	High	High	High	High	High	1		3	3	Present Both	1	GLYMA_08G170000	GLYMA_08G170000	sp|Q9SGT4|EF2_ARATH	Elongation factor 2 GN=LOS1	ident:786/843 pos:817/843 query:843 hit:843 align:843 bit:1658.7	OK	Elongation factor 2 (EF-2)	Protein LOW EXPRESSION OF OSMOTICALLY RESPONSIVE GENES 1	EF2_ARATH	Q9ASR1	C0Z355; Q56WX9; Q56WY3; Q570K2; Q84R07; Q8H145; Q94CA4; Q9SGT4	LOS1	na	Arabidopsis thaliana (Mouse-ear cress)
High	Master Protein	GLYMA_08G171500		K03242 - translation initiation factor 2 subunit 3 (EIF2S3) (1 of 2)	0	24.93	10	4	9	4	466	50.9	8.68	23.4	4	0	0.902	0.996833	25.52	142.5	57.5	55.95	60.86	High	High	High	High	High	Peak Found	1		3	3	Present Both	1	GLYMA_08G171500	GLYMA_08G171500	sp|Q9ZT91|EFTM_ARATH	Elongation factor Tu, mitochondrial GN=TUFA	ident:78/466 pos:122/466 query:466 hit:454 align:279 bit:76.3	Poor_match	Elongation factor Tu, mitochondrial	na	EFTM_ARATH	Q9ZT91	Q39206	TUFA	na	Arabidopsis thaliana (Mouse-ear cress)
High	Master Protein	GLYMA_01G029600		K03246 - translation initiation factor 3 subunit I (EIF3I) (1 of 3)	0	130.89	60	14	58	6	326	35.8	7.34	201.82	14	9	0.863	0.996833	47.33	106.2	93.8	22.83	26.39	High	High	High	High	High	High	1		3	3	Present Both	1	GLYMA_01G029600	GLYMA_01G029600	sp|Q38884|EIF3I_ARATH	Eukaryotic translation initiation factor 3 subunit I GN=TIF3I1	ident:271/326 pos:301/326 query:326 hit:328 align:328 bit:554.3	OK	Eukaryotic translation initiation factor 3 subunit I (eIF3i)	Eukaryotic translation initiation factor 3 subunit 2; TGF-beta receptor-interacting protein 1 (TRIP-1); eIF-3-beta; eIF3 p36	EIF3I_ARATH	Q38884	O82342; Q94K09; Q9C5Z0	TIF3I1	na	Arabidopsis thaliana (Mouse-ear cress)
High	Master Protein	GLYMA_09G234100		K03246 - translation initiation factor 3 subunit I (EIF3I) (1 of 3)	0	153.922	65	14	61	4	326	35.8	6.76	230.2	14	0	1.358	0.930979	57.42	89.6	110.4	44.26	1.15	High	High	Peak Found	High	High	Not Found	1		3	2	Present Both	1	GLYMA_09G234100	GLYMA_09G234100	sp|Q38884|EIF3I_ARATH	Eukaryotic translation initiation factor 3 subunit I GN=TIF3I1	ident:267/326 pos:300/326 query:326 hit:328 align:328 bit:547.4	OK	Eukaryotic translation initiation factor 3 subunit I (eIF3i)	Eukaryotic translation initiation factor 3 subunit 2; TGF-beta receptor-interacting protein 1 (TRIP-1); eIF-3-beta; eIF3 p36	EIF3I_ARATH	Q38884	O82342; Q94K09; Q9C5Z0	TIF3I1	na	Arabidopsis thaliana (Mouse-ear cress)
High	Master Protein	GLYMA_12G002900		K03246 - translation initiation factor 3 subunit I (EIF3I) (1 of 3)	0	178.595	64	14	71	4	326	35.9	6.76	285.77	14	4	0.744	0.973817	44	136.1	63.9	70.5	43.85	High	High	High	High	High	High	1		3	3	Present Both	1	GLYMA_12G002900	GLYMA_12G002900	sp|Q38884|EIF3I_ARATH	Eukaryotic translation initiation factor 3 subunit I GN=TIF3I1	ident:266/326 pos:300/326 query:326 hit:328 align:328 bit:548.1	OK	Eukaryotic translation initiation factor 3 subunit I (eIF3i)	Eukaryotic translation initiation factor 3 subunit 2; TGF-beta receptor-interacting protein 1 (TRIP-1); eIF-3-beta; eIF3 p36	EIF3I_ARATH	Q38884	O82342; Q94K09; Q9C5Z0	TIF3I1	na	Arabidopsis thaliana (Mouse-ear cress)
High	Master Protein	GLYMA_18G133400		K03248 - translation initiation factor 3 subunit G (EIF3G) (1 of 2)	0	74.255	44	12	54	12	290	32.2	8.21	126.77	12	0	0.889	0.996833	54.13	95.3	104.7	10.53	35.03	High	High	High	High	High	High	1		3	3	Present Both	1	GLYMA_18G133400	GLYMA_18G133400	sp|Q9SYG4|UBP1A_ARATH	Oligouridylate-binding protein 1A GN=UBP1A	ident:38/290 pos:52/290 query:290 hit:426 align:89 bit:67.4	Partial_match_both	Oligouridylate-binding protein 1A (AtUBP1a)	Polyuridylate-binding protein UBP1A (Poly(U)-binding protein UBP1A)	UBP1A_ARATH	Q9SYG4	na	UBP1A	na	Arabidopsis thaliana (Mouse-ear cress)
High	Master Protein	GLYMA_18G029500		K03249 - translation initiation factor 3 subunit F (EIF3F) (1 of 4)	0	50.504	43	8	18	2	289	31.7	5.34	56.08	8	5	0.866	0.996833	45	108.8	91.2	28.97	36.9	High	High	Peak Found	Peak Found	Peak Found	High	1		3	3	Present Both	1	GLYMA_18G029500	GLYMA_18G029500	sp|O04202|EIF3F_ARATH	Eukaryotic translation initiation factor 3 subunit F GN=TIF3F1	ident:222/289 pos:263/289 query:289 hit:293 align:291 bit:449.1	OK	Eukaryotic translation initiation factor 3 subunit F (eIF3f)	eIF-3-epsilon; eIF3 p32 subunit	EIF3F_ARATH	O04202	Q8W4H4	TIF3F1	na	Arabidopsis thaliana (Mouse-ear cress)
High	Master Protein	GLYMA_02G187100		K03250 - translation initiation factor 3 subunit E (EIF3E, INT6) (1 of 2)	0	25.804	8	3	13	1	437	51.1	5.82	29.44	3	0	0.69	0.945815	8.52	118.4	81.6	45.67	8.58	High	High	High	High	High	High	1		3	3	Present Both	1	GLYMA_02G187100	GLYMA_02G187100	sp|Q9C5Z3|EIF3E_ARATH	Eukaryotic translation initiation factor 3 subunit E GN=TIF3E1	ident:376/437 pos:405/437 query:437 hit:441 align:434 bit:799.7	OK	Eukaryotic translation initiation factor 3 subunit E (AtEIF3E-1; eIF3e; p48)	Eukaryotic translation initiation factor 3 subunit 6 (AtINT6; INT-6)	EIF3E_ARATH	Q9C5Z3	Q9M2L8; Q9M4T7	TIF3E1	na	Arabidopsis thaliana (Mouse-ear cress)
High	Master Protein	GLYMA_10G106100		K03250 - translation initiation factor 3 subunit E (EIF3E, INT6) (1 of 2)	0	26.686	10	4	13	2	437	51.2	5.64	22.12	4	2	0.563	0.739503	12.94	141.3	58.7	55.78	26.11	High	High	High	High	High	Peak Found	1		3	3	Present Both	1	GLYMA_10G106100	GLYMA_10G106100	sp|Q9C5Z3|EIF3E_ARATH	Eukaryotic translation initiation factor 3 subunit E GN=TIF3E1	ident:378/437 pos:406/437 query:437 hit:441 align:434 bit:800.4	OK	Eukaryotic translation initiation factor 3 subunit E (AtEIF3E-1; eIF3e; p48)	Eukaryotic translation initiation factor 3 subunit 6 (AtINT6; INT-6)	EIF3E_ARATH	Q9C5Z3	Q9M2L8; Q9M4T7	TIF3E1	na	Arabidopsis thaliana (Mouse-ear cress)
High	Master Protein	GLYMA_03G206400		K03252 - translation initiation factor 3 subunit C (EIF3C) (1 of 3)	0	17.967	7	4	12	4	926	104.6	5.63	19.98	4	0	1.195	0.988182	36.27	72.6	127.4	53.15	40.3	High	High	High	High	High	High	1		3	3	Present Both	1	GLYMA_03G206400	GLYMA_03G206400	sp|O49160|EIF3C_ARATH	Eukaryotic translation initiation factor 3 subunit C GN=TIF3C1	ident:641/926 pos:743/926 query:926 hit:900 align:936 bit:1180.2	OK	Eukaryotic translation initiation factor 3 subunit C (eIF3c)	Eukaryotic translation initiation factor 3 subunit 8; eIF3 p110; p105	EIF3C_ARATH	O49160	Q9LYM6	TIF3C1	na	Arabidopsis thaliana (Mouse-ear cress)
High	Master Protein	GLYMA_04G052900		K03257 - translation initiation factor 4A (EIF4A) (1 of 11)	0	108.865	39	11	51	2	413	46.7	5.48	155.75	11	0	0.379	0.217849	13.18	89.1	110.9	83.22	12.68	High	High	Peak Found	Not Found	Peak Found	Peak Found	1		3	2	Present Both	1	GLYMA_04G052900	GLYMA_04G052900	sp|P41376|IF4A1_ARATH	Eukaryotic initiation factor 4A-1 GN=TIF4A-1	ident:384/413 pos:405/413 query:413 hit:412 align:414 bit:794.7	OK	Eukaryotic initiation factor 4A-1 (eIF-4A-1)	ATP-dependent RNA helicase eIF4A-1; DEAD-box ATP-dependent RNA helicase 4	IF4A1_ARATH	P41376	Q0WWD9; Q546P0; Q8LBZ6; Q8RXF3; Q94CM1	TIF4A-1	RH4	Arabidopsis thaliana (Mouse-ear cress)
High	Master Protein	GLYMA_15G026100		K03257 - translation initiation factor 4A (EIF4A) (1 of 11)	0	108.091	35	12	53	2	413	46.6	5.55	177.11	12	0	0.74	0.971171	30.74	120.7	79.3	24.16	22.42	High	High	Peak Found	High	High	High	1		3	3	Present Both	1	GLYMA_15G026100	GLYMA_15G026100	sp|P41377|IF4A2_ARATH	Eukaryotic initiation factor 4A-2 GN=TIF4A-2	ident:385/413 pos:399/413 query:413 hit:412 align:414 bit:790.0	OK	Eukaryotic initiation factor 4A-2 (eIF-4A-2)	ATP-dependent RNA helicase eIF4A-2; DEAD-box ATP-dependent RNA helicase 19	IF4A2_ARATH	P41377	Q0WWK5	TIF4A-2	RH19	Arabidopsis thaliana (Mouse-ear cress)
High	Master Protein	GLYMA_02G203700		K03263 - translation initiation factor 5A (EIF5A) (1 of 7)	0	4.396	11	2	8	2	160	17.5	5.76	11.07	2	0	1.058	0.996833	48.68	92.9	107.1	48.85	18.86	High	High	High	High	High	High	1		3	3	Present Both	1	GLYMA_02G203700	GLYMA_02G203700	sp|Q9XI91|IF5A1_ARATH	Eukaryotic translation initiation factor 5A-1 GN=ELF5A-1	ident:142/160 pos:150/160 query:160 hit:158 align:159 bit:292.0	OK	Eukaryotic translation initiation factor 5A-1 (AtELF5A-1; eIF-5A-1)	na	IF5A1_ARATH	Q9XI91	Q9LMG2	ELF5A-1	na	Arabidopsis thaliana (Mouse-ear cress)
High	Master Protein	GLYMA_09G166000		K03265 - peptide chain release factor subunit 1 (ETF1, ERF1) (1 of 5)	0	7.329	3	1	4	1	451	50.7	5.86	13.21	1	0	1.019	0.996833	8.99	99.9	100.1	19.41	4.54	High	High	Peak Found	High	Peak Found	High	1		3	3	Present Both	1	GLYMA_09G166000	GLYMA_09G166000	sp|P35614|ERF1Z_ARATH	Eukaryotic peptide chain release factor subunit 1-3 GN=ERF1-3	ident:391/451 pos:416/451 query:451 hit:435 align:433 bit:818.9	OK	Eukaryotic peptide chain release factor subunit 1-3 (Eukaryotic release factor 1-3; eRF1-3)	Omnipotent suppressor protein 1 homolog 3 (SUP1 homolog 3)	ERF1Z_ARATH	P35614	na	ERF1-3	na	Arabidopsis thaliana (Mouse-ear cress)
High	Master Protein	GLYMA_08G173700		K03541 - photosystem II 10kDa protein (psbR) (1 of 2)	0	4.129	17	1	1	1	139	14.3	9.7	2.5	1	0	0.01	1.31e-16		200				High	Not Found	Not Found	Not Found	Not Found	Not Found	1		1	0	Missing Both	1	GLYMA_08G173700	GLYMA_08G173700	sp|P27202|PSBR_ARATH	Photosystem II 10 kDa polypeptide, chloroplastic GN=PSBR	ident:108/139 pos:123/139 query:139 hit:140 align:140 bit:214.2	OK	Photosystem II 10 kDa polypeptide, chloroplastic	na	PSBR_ARATH	P27202	na	PSBR	ART1	Arabidopsis thaliana (Mouse-ear cress)
High	Master Protein	GLYMA_04G227400		K03626 - nascent polypeptide-associated complex subunit alpha (EGD2, NACA) (1 of 8)	0	46.022	33	6	21	6	223	24.2	4.45	64.19	6	0	0.524	0.636261	23.12	178.8	21.2	82.75	85.77	High	High	Peak Found	High	High	High	1		3	3	Present Both	1	GLYMA_04G227400	GLYMA_04G227400	sp|Q94JX9|NACA2_ARATH	Nascent polypeptide-associated complex subunit alpha-like protein 2 GN=NAC096	ident:153/223 pos:182/223 query:223 hit:217 align:225 bit:242.7	OK	Nascent polypeptide-associated complex subunit alpha-like protein 2 (NAC-alpha-like protein 2)	Alpha-NAC-like protein 2	NACA2_ARATH	Q94JX9	Q9S7G0	OrderedLocusNames=At3g49470	na	Arabidopsis thaliana (Mouse-ear cress)
High	Master Protein	GLYMA_19G125500		K03626 - nascent polypeptide-associated complex subunit alpha (EGD2, NACA) (1 of 8)	0	42.291	35	6	15	2	205	22.4	4.63	38.58	6	4	0.568	0.746622	20.6	159.1	40.9	62.73	95.35	High	High	Peak Found	Not Found	Peak Found	High	1		3	2	Present Both	1	GLYMA_19G125500	GLYMA_19G125500	sp|Q9LHG9|NACA1_ARATH	Nascent polypeptide-associated complex subunit alpha-like protein 1 GN=NAC030	ident:156/205 pos:175/205 query:205 hit:203 align:202 bit:240.7	OK	Nascent polypeptide-associated complex subunit alpha-like protein 1 (NAC-alpha-like protein 1)	Alpha-NAC-like protein 1	NACA1_ARATH	Q9LHG9	na	OrderedLocusNames=At3g12390	na	Arabidopsis thaliana (Mouse-ear cress)
High	Master Protein	GLYMA_04G200400		K03696 - ATP-dependent Clp protease ATP-binding subunit ClpC (clpC) (1 of 6)	0	96.305	24	18	43	2	922	102.5	6.55	115.49	18	15	0.946	0.999168	43.32	90.3	109.7	10.26	43.03	High	Peak Found	Not Found	High	High	Peak Found	1		2	3	Present Both	1	GLYMA_04G200400	GLYMA_04G200400	sp|Q9FI56|CLPC1_ARATH	Chaperone protein ClpC1, chloroplastic GN=CLPC1	ident:821/922 pos:863/922 query:922 hit:929 align:925 bit:1596.6	OK	Chaperone protein ClpC1, chloroplastic	ATP-dependent Clp protease ATP-binding subunit ClpC homolog 1; Casein lytic proteinase C1; Protein DE-REGULATED CAO ACCUMULATION 1; Protein IRON-RESCUED MUTANT 1	CLPC1_ARATH	Q9FI56	O48931	CLPC1	na	Arabidopsis thaliana (Mouse-ear cress)
High	Master Protein	GLYMA_04G017500		K03781 - catalase (katE, CAT, catB, srpA) (1 of 4)	0	53.713	17	8	29	1	492	56.7	7.28	67.39	8	0	2.003	0.421809	53.04	66.6	133.4	26.6	81.29	High	High	Peak Found	Peak Found	Peak Found	High	1		3	3	Present Both	1	GLYMA_04G017500	GLYMA_04G017500	sp|P25819|CATA2_ARATH	Catalase-2 GN=CAT2	ident:426/492 pos:471/492 query:492 hit:492 align:492 bit:924.9	OK	Catalase-2	na	CATA2_ARATH	P25819	O49615	CAT2	CAT	Arabidopsis thaliana (Mouse-ear cress)
High	Master Protein	GLYMA_14G223500		K03781 - catalase (katE, CAT, catB, srpA) (1 of 4)	0	66.636	21	8	36	4	492	56.9	7.25	99.06	8	0	0.669	0.932333	19.19	122.5	77.5	51.05	54.83	High	High	Peak Found	High	High	High	1		3	3	Present Both	1	GLYMA_14G223500	GLYMA_14G223500	sp|P25819|CATA2_ARATH	Catalase-2 GN=CAT2	ident:428/492 pos:470/492 query:492 hit:492 align:492 bit:925.6	OK	Catalase-2	na	CATA2_ARATH	P25819	O49615	CAT2	CAT	Arabidopsis thaliana (Mouse-ear cress)
High	Master Protein	GLYMA_13G249600		K03809 - NAD(P)H dehydrogenase (quinone) (wrbA) (1 of 20)	0	323.521	67	20	192	3	203	21.7	6.95	839.76	20	17	0.999	0.996833	69.71	87.2	112.8	31.04	6.24	High	High	High	High	High	High	1		3	3	Present Both	1	GLYMA_13G249600	GLYMA_13G249600	sp|Q6NQE2|FQRL1_ARATH	Probable NAD(P)H dehydrogenase (quinone) FQR1-like 1 GN=FPGS3	ident:170/203 pos:182/203 query:203 hit:205 align:201 bit:351.3	OK	Probable NAD(P)H dehydrogenase (quinone) FQR1-like 1	na	FQRL1_ARATH	Q6NQE2	O81830	OrderedLocusNames=At4g27270	na	Arabidopsis thaliana (Mouse-ear cress)
High	Master Protein	GLYMA_13G284200		K03809 - NAD(P)H dehydrogenase (quinone) (wrbA) (1 of 20)	0	172.069	67	14	88	1	203	21.7	6.95	296.84	14	0	1.004	0.996833	25.12	98.9	101.1	10.88	45.45	High	High	High	High	High	High	1		3	3	Present Both	1	GLYMA_13G284200	GLYMA_13G284200	sp|Q9LSQ5|FQR1_ARATH	NAD(P)H dehydrogenase (quinone) FQR1 GN=FQR1	ident:181/203 pos:192/203 query:203 hit:204 align:200 bit:376.7	OK	NAD(P)H dehydrogenase (quinone) FQR1	Flavodoxin-like quinone reductase 1	FQR1_ARATH	Q9LSQ5	na	FQR1	na	Arabidopsis thaliana (Mouse-ear cress)
High	Master Protein	GLYMA_15G064700		K03809 - NAD(P)H dehydrogenase (quinone) (wrbA) (1 of 20)	0	317.007	67	19	187	2	203	21.7	6.95	818.44	19	0	0.557	0.722803	19.62	116.3	83.7	14.67	34.54	High	High	High	High	High	High	1		3	3	Present Both	1	GLYMA_15G064700	GLYMA_15G064700	sp|Q6NQE2|FQRL1_ARATH	Probable NAD(P)H dehydrogenase (quinone) FQR1-like 1 GN=FPGS3	ident:173/203 pos:184/203 query:203 hit:205 align:201 bit:357.1	OK	Probable NAD(P)H dehydrogenase (quinone) FQR1-like 1	na	FQRL1_ARATH	Q6NQE2	O81830	OrderedLocusNames=At4g27270	na	Arabidopsis thaliana (Mouse-ear cress)
High	Master Protein	GLYMA_11G214800		K03934 - NADH dehydrogenase (ubiquinone) Fe-S protein 1 (NDUFS1) (1 of 2)	0	343.183	55	31	159	9	747	81.3	6.7	550.84	31	27	1.118	0.996833	42.82	80.5	119.5	36.33	18.45	High	High	High	High	High	High	1		3	3	Present Both	1	GLYMA_11G214800	GLYMA_11G214800	sp|Q9FGI6|NDUS1_ARATH	NADH dehydrogenase [ubiquinone] iron-sulfur protein 1, mitochondrial GN=EMB1467	ident:604/747 pos:671/747 query:747 hit:748 align:747 bit:1248.8	OK	NADH dehydrogenase [ubiquinone] iron-sulfur protein 1, mitochondrial	Protein EMBRYO DEFECTIVE 1467	NDUS1_ARATH	Q9FGI6	Q940B1	EMB1467	na	Arabidopsis thaliana (Mouse-ear cress)
High	Master Protein	GLYMA_18G041700		K03934 - NADH dehydrogenase (ubiquinone) Fe-S protein 1 (NDUFS1) (1 of 2)	0	300.066	51	29	129	7	746	81.2	6.62	433.26	29	0	0.796	0.996833	14.21	105.8	94.2	6.08	15.42	High	High	High	High	High	High	1		3	3	Present Both	1	GLYMA_18G041700	GLYMA_18G041700	sp|Q9FGI6|NDUS1_ARATH	NADH dehydrogenase [ubiquinone] iron-sulfur protein 1, mitochondrial GN=EMB1467	ident:601/746 pos:666/746 query:746 hit:748 align:746 bit:1237.6	OK	NADH dehydrogenase [ubiquinone] iron-sulfur protein 1, mitochondrial	Protein EMBRYO DEFECTIVE 1467	NDUS1_ARATH	Q9FGI6	Q940B1	EMB1467	na	Arabidopsis thaliana (Mouse-ear cress)
High	Master Protein	GLYMA_05G106100		K03937 - NADH dehydrogenase (ubiquinone) Fe-S protein 4 (NDUFS4) (1 of 2)	0	151.572	66	13	107	6	146	16.3	9.8	291.88	13	7	1.663	0.692571	60.22	72.7	127.3	50.23	13.43	High	High	High	High	High	High	1		3	3	Present Both	1	GLYMA_05G106100	GLYMA_05G106100	sp|Q9FJW4|NDUS4_ARATH	NADH dehydrogenase [ubiquinone] iron-sulfur protein 4, mitochondrial GN=FRO1	ident:109/146 pos:128/146 query:146 hit:154 align:149 bit:224.9	OK	NADH dehydrogenase [ubiquinone] iron-sulfur protein 4, mitochondrial	Protein FROSTBITE1	NDUS4_ARATH	Q9FJW4	Q8LC28	FRO1	na	Arabidopsis thaliana (Mouse-ear cress)
High	Master Protein	GLYMA_17G160400		K03937 - NADH dehydrogenase (ubiquinone) Fe-S protein 4 (NDUFS4) (1 of 2)	0	122.935	66	11	79	4	146	16.3	9.85	230.41	11	0	2	0.423937	43.45	64.4	135.6	25.12	33.1	High	High	High	High	High	High	1		3	3	Present Both	1	GLYMA_17G160400	GLYMA_17G160400	sp|Q9FJW4|NDUS4_ARATH	NADH dehydrogenase [ubiquinone] iron-sulfur protein 4, mitochondrial GN=FRO1	ident:108/146 pos:128/146 query:146 hit:154 align:149 bit:224.6	OK	NADH dehydrogenase [ubiquinone] iron-sulfur protein 4, mitochondrial	Protein FROSTBITE1	NDUS4_ARATH	Q9FJW4	Q8LC28	FRO1	na	Arabidopsis thaliana (Mouse-ear cress)
High	Master Protein	GLYMA_11G091800		K03939 - NADH dehydrogenase (ubiquinone) Fe-S protein 6 (NDUFS6) (1 of 2)	0	140.912	38	5	66	5	105	11.7	7.43	244.52	5	0	1.254	0.970114	70.89	94.9	105.1	27.86	31.12	High	High	High	High	High	High	1		3	3	Present Both	1	GLYMA_11G091800	GLYMA_11G091800	sp|Q9M9M6|NDUS6_ARATH	NADH dehydrogenase [ubiquinone] iron-sulfur protein 6, mitochondrial GN=NDL2	ident:77/105 pos:90/105 query:105 hit:110 align:113 bit:157.9	OK	NADH dehydrogenase [ubiquinone] iron-sulfur protein 6, mitochondrial	na	NDUS6_ARATH	Q9M9M6	Q41901	OrderedLocusNames=At3g03070	na	Arabidopsis thaliana (Mouse-ear cress)
High	Master Protein	GLYMA_04G050600		K03940 - NADH dehydrogenase (ubiquinone) Fe-S protein 7 (NDUFS7) (1 of 3)	0	40.348	17	4	21	4	213	23.5	9.44	68.59	4	0	1.099	0.996833	57.15	95.5	104.5	32.37	22.69	High	High	High	High	High	High	1		3	3	Present Both	1	GLYMA_04G050600	GLYMA_04G050600	sp|Q42577|NDUS7_ARATH	NADH dehydrogenase [ubiquinone] iron-sulfur protein 7, mitochondrial GN=NEAP3	ident:179/213 pos:194/213 query:213 hit:218 align:221 bit:350.5	OK	NADH dehydrogenase [ubiquinone] iron-sulfur protein 7, mitochondrial	na	NDUS7_ARATH	Q42577	na	OrderedLocusNames=At5g11770	na	Arabidopsis thaliana (Mouse-ear cress)
High	Master Protein	GLYMA_18G217700		K03945 - NADH dehydrogenase (ubiquinone) 1 alpha subcomplex subunit 1 (NDUFA1) (1 of 2)	0	84.388	41	5	60	3	64	7.3	8.92	153.82	5	6	1.364	0.921688	64.16	90.6	109.4	47.48	15.55	High	High	High	High	High	High	1		3	3	Present Both	1	GLYMA_18G217700	GLYMA_18G217700	sp|Q9C9Z5|NDUA1_ARATH	NADH dehydrogenase [ubiquinone] 1 alpha subcomplex subunit 1 GN=NDT1	ident:48/64 pos:60/64 query:64 hit:65 align:65 bit:107.1	OK	NADH dehydrogenase [ubiquinone] 1 alpha subcomplex subunit 1	na	NDUA1_ARATH	Q9C9Z5	Q84MD9	OrderedLocusNames=At3g08610	na	Arabidopsis thaliana (Mouse-ear cress)
High	Master Protein	GLYMA_04G179100		K03946 - NADH dehydrogenase (ubiquinone) 1 alpha subcomplex subunit 2 (NDUFA2) (1 of 2)	0	48.991	29	5	34	2	98	11.1	9.36	105.33	5	3	1.055	0.996833	42.48	89	111	33.06	17.39	High	High	High	High	High	High	1		3	3	Present Both	1	GLYMA_04G179100	GLYMA_04G179100	sp|Q9FIJ2|NDUA2_ARATH	NADH dehydrogenase [ubiquinone] 1 alpha subcomplex subunit 2 GN=NDB1	ident:68/98 pos:87/98 query:98 hit:97 align:95 bit:155.2	OK	NADH dehydrogenase [ubiquinone] 1 alpha subcomplex subunit 2	na	NDUA2_ARATH	Q9FIJ2	na	OrderedLocusNames=At5g47890	na	Arabidopsis thaliana (Mouse-ear cress)
High	Master Protein	GLYMA_09G129000		K03949 - NADH dehydrogenase (ubiquinone) 1 alpha subcomplex subunit 5 (NDUFA5) (1 of 1)	0	48.342	36	4	28	4	166	18.6	5.01	130.19	4	0	0.782	0.996833	35.84	121.2	78.8	15.27	69.33	High	High	High	High	High	High	1		3	3	Present Both	1	GLYMA_09G129000	GLYMA_09G129000	sp|Q9FLX7|NDUA5_ARATH	Probable NADH dehydrogenase [ubiquinone] 1 alpha subcomplex subunit 5, mitochondrial GN=NSL1	ident:130/166 pos:142/166 query:166 hit:169 align:164 bit:266.5	OK	Probable NADH dehydrogenase [ubiquinone] 1 alpha subcomplex subunit 5, mitochondrial	na	NDUA5_ARATH	Q9FLX7	na	OrderedLocusNames=At5g52840	na	Arabidopsis thaliana (Mouse-ear cress)
High	Master Protein	GLYMA_13G193600		K03950 - NADH dehydrogenase (ubiquinone) 1 alpha subcomplex subunit 6 (NDUFA6) (1 of 2)	0	154.37	82	12	102	2	131	15.1	8.7	282.02	12	14	0.98	0.996833	44.24	109.5	90.5	21.32	12.38	High	High	High	High	High	High	1		3	3	Present Both	1	GLYMA_13G193600	GLYMA_13G193600	sp|Q9LHI0|NDUA6_ARATH	NADH dehydrogenase [ubiquinone] 1 alpha subcomplex subunit 6 GN=NDC80	ident:84/131 pos:107/131 query:131 hit:133 align:128 bit:188.0	OK	NADH dehydrogenase [ubiquinone] 1 alpha subcomplex subunit 6	na	NDUA6_ARATH	Q9LHI0	na	OrderedLocusNames=At3g12260	na	Arabidopsis thaliana (Mouse-ear cress)
High	Master Protein	GLYMA_15G231900		K03950 - NADH dehydrogenase (ubiquinone) 1 alpha subcomplex subunit 6 (NDUFA6) (1 of 2)	0	150.299	73	11	78	5	131	15.1	9.31	226.95	11	0	1.29	0.950125	67.97	94.4	105.6	19.99	44.04	High	High	High	High	High	High	1		3	3	Present Both	1	GLYMA_15G231900	GLYMA_15G231900	sp|Q9LHI0|NDUA6_ARATH	NADH dehydrogenase [ubiquinone] 1 alpha subcomplex subunit 6 GN=NDC80	ident:87/131 pos:109/131 query:131 hit:133 align:131 bit:193.4	OK	NADH dehydrogenase [ubiquinone] 1 alpha subcomplex subunit 6	na	NDUA6_ARATH	Q9LHI0	na	OrderedLocusNames=At3g12260	na	Arabidopsis thaliana (Mouse-ear cress)
High	Master Protein	GLYMA_13G127400		K03953 - NADH dehydrogenase (ubiquinone) 1 alpha subcomplex subunit 9 (NDUFA9) (1 of 1)	0	108.638	47	16	67	16	396	43.8	9.2	182.22	16	0	1.071	0.996833	73.95	85.4	114.6	35.97	10.57	High	High	High	High	High	High	1		3	3	Present Both	1	GLYMA_13G127400	GLYMA_13G127400	sp|Q9SK66|NDUA9_ARATH	NADH dehydrogenase [ubiquinone] 1 alpha subcomplex subunit 9, mitochondrial GN=NCED9	ident:294/396 pos:352/396 query:396 hit:402 align:402 bit:599.0	OK	NADH dehydrogenase [ubiquinone] 1 alpha subcomplex subunit 9, mitochondrial	na	NDUA9_ARATH	Q9SK66	B9DHU2; Q93VY5	OrderedLocusNames=At2g20360	na	Arabidopsis thaliana (Mouse-ear cress)
High	Master Protein	GLYMA_09G248500		K03955 - NADH dehydrogenase (ubiquinone) 1 alpha/beta subcomplex 1 (NDUFAB1) (1 of 5)	0	13.312	10	1	8	1	128	14.4	5.57	25.34	1	0	1.373	0.909246	49.33	70.7	129.3	46.22	25.26	High	High	High	High	High	High	1		3	3	Present Both	1	GLYMA_09G248500	GLYMA_09G248500	sp|O80800|ACPM2_ARATH	Acyl carrier protein 2, mitochondrial GN=MTACP2	ident:92/128 pos:103/128 query:128 hit:126 align:120 bit:182.2	OK	Acyl carrier protein 2, mitochondrial	MtACP-2 (ACP); NADH-ubiquinone oxidoreductase 9.6 kDa subunit	ACPM2_ARATH	O80800	Q8LEU1	MTACP2	na	Arabidopsis thaliana (Mouse-ear cress)
High	Master Protein	GLYMA_20G108500		K03963 - NADH dehydrogenase (ubiquinone) 1 beta subcomplex subunit 7 (NDUFB7) (1 of 1)	0	120.214	60	9	133	9	98	11.6	8.18	378.24	9	0	0.936	0.996833	59.33	115	85	15.1	28.89	High	High	High	High	High	High	1	Acetyl [N-Term]	3	3	Present Both	1	GLYMA_20G108500	GLYMA_20G108500	sp|Q9SKC9|NDUB7_ARATH	NADH dehydrogenase [ubiquinone] 1 beta subcomplex subunit 7 GN=OFUT9	ident:75/98 pos:82/98 query:98 hit:103 align:105 bit:144.4	OK	NADH dehydrogenase [ubiquinone] 1 beta subcomplex subunit 7	na	NDUB7_ARATH	Q9SKC9	Q42155; Q42220; Q8GXZ6	OrderedLocusNames=At2g02050	na	Arabidopsis thaliana (Mouse-ear cress)
High	Master Protein	GLYMA_04G008100		K03965 - NADH dehydrogenase (ubiquinone) 1 beta subcomplex subunit 9 (NDUFB9) (1 of 2)	0	79.748	77	11	39	4	115	13.5	7.58	100.57	11	7	1.554	0.767135	74.94	46.8	153.2	74.1	49.62	High	Not Found	High	High	High	High	1		2	3	Present Both	1	GLYMA_04G008100	GLYMA_04G008100	sp|Q945M1|NDUB9_ARATH	NADH dehydrogenase [ubiquinone] 1 beta subcomplex subunit 9 GN=CIB22	ident:94/115 pos:99/115 query:115 hit:117 align:113 bit:196.1	OK	NADH dehydrogenase [ubiquinone] 1 beta subcomplex subunit 9	B22 subunit of eukaryotic mitochondrial complex I; Complex I-B22 (AtCIB22; CI-B22); NADH-ubiquinone oxidoreductase B22 subunit	NDUB9_ARATH	Q945M1	O65692; Q56Z32; Q8LDS9	CIB22	na	Arabidopsis thaliana (Mouse-ear cress)
High	Master Protein	GLYMA_12G049400		K03969 - phage shock protein A (pspA) (1 of 3)	0	27.022	22	5	11	5	323	35.5	9.33	35.93	5	0	1.313	0.945815	41.11	91.1	108.9	8.7	30.32	High	High	High	High	High	High	1		3	3	Present Both	1	GLYMA_12G049400	GLYMA_12G049400	sp|O80796|VIPP1_ARATH	Membrane-associated protein VIPP1, chloroplastic GN=VIPP1	ident:225/323 pos:276/323 query:323 hit:330 align:332 bit:427.2	OK	Membrane-associated protein VIPP1, chloroplastic	Protein VESICLE-INDUCING PROTEIN IN PLASTIDS 1	VIPP1_ARATH	O80796	na	VIPP1	na	Arabidopsis thaliana (Mouse-ear cress)
High	Master Protein	GLYMA_08G065100		K04043 - molecular chaperone DnaK (dnaK) (1 of 4)	0	58.119	17	11	38	11	677	72.5	6.04	99.92	11	0	0.999	0.996833	33.74	102.8	97.2	15.09	23.54	High	High	High	High	High	High	1		3	3	Present Both	1	GLYMA_08G065100	GLYMA_08G065100	sp|Q9LDZ0|HSP7J_ARATH	Heat shock 70 kDa protein 10, mitochondrial GN=HSP70-10	ident:576/677 pos:627/677 query:677 hit:682 align:681 bit:1176.0	OK	Heat shock 70 kDa protein 10, mitochondrial	Heat shock protein 70-10 (AtHsp70-10); Mitochondrial heat shock protein 70-2 (mtHsc70-2)	HSP7J_ARATH	Q9LDZ0	na	HSP70-10	HSC70-5; MTHSC70-2	Arabidopsis thaliana (Mouse-ear cress)
High	Master Protein	GLYMA_01G197100		K04487 - cysteine desulfurase (iscS, NFS1) (1 of 2)	0	4.84	4	1	2	1	457	50.5	7.85	6.17	1	0	0.01	1.31e-16		200		10.85		High	High	Not Found	Not Found	Not Found	Not Found	1		2	0	Only Control	1	GLYMA_01G197100	GLYMA_01G197100	sp|O49543|MNIF1_ARATH	Cysteine desulfurase, mitochondrial GN=NIFS1	ident:353/457 pos:401/457 query:457 hit:453 align:458 bit:739.6	OK	Cysteine desulfurase, mitochondrial	NIFS homolog 1 (AtNIFS1); Protein AtMtNifS	MNIF1_ARATH	O49543	na	NIFS1	na	Arabidopsis thaliana (Mouse-ear cress)
High	Master Protein	GLYMA_20G018500		K04507 - calcyclin binding protein (CACYBP, SIP) (1 of 2)	0	11.534	13	2	2	2	215	24.3	8.29	5.93	2	0	0.27	0.0349956	2.2	157.5	42.5	28.16		High	High	Not Found	Not Found	Not Found	Peak Found	1		2	1	Only Control	1	GLYMA_20G018500	GLYMA_20G018500	sp|Q9SUR9|SGT1A_ARATH	Protein SGT1 homolog A GN=SGT1A	ident:40/215 pos:78/215 query:215 hit:350 align:192 bit:37.4	Poor_match	Protein SGT1 homolog A (AtSGT1a)	Suppressor of G2 allele of SKP1 homolog A	SGT1A_ARATH	Q9SUR9	Q84LL4; Q8W515	SGT1A	na	Arabidopsis thaliana (Mouse-ear cress)
High	Master Protein	GLYMA_03G242900		K04565 - superoxide dismutase, Cu-Zn family (SOD1) (1 of 6)	0	48.67	13	2	22	2	152	15.2	6.04	97.33	2	0	1.6	0.743523	67.35	100.1	99.9	63.17	55.15	High	High	High	High	High	High	1		3	3	Present Both	1	GLYMA_03G242900	GLYMA_03G242900	sp|P24704|SODC1_ARATH	Superoxide dismutase [Cu-Zn] 1 GN=CSD1	ident:126/152 pos:136/152 query:152 hit:152 align:152 bit:254.2	OK	Superoxide dismutase [Cu-Zn] 1	Copper/zinc superoxide dismutase 1	SODC1_ARATH	P24704	A3FMJ0; Q9FRQ6	CSD1	SODCC	Arabidopsis thaliana (Mouse-ear cress)
High	Master Protein	GLYMA_11G231100		K04646 - clathrin heavy chain (CLTC) (1 of 8)	0	92.754	9	10	30	10	1700	192.9	5.44	66.64	10	0	1.05	0.996833	72.14	126.9	73.1	38.75	71.4	High	High	High	High	High	High	1		3	3	Present Both	1	GLYMA_11G231100	GLYMA_11G231100	sp|Q0WNJ6|CLAH1_ARATH	Clathrin heavy chain 1 GN=CHC1	ident:1536/1700 pos:1616/1700 query:1700 hit:1705 align:1657 bit:3226.8	OK	Clathrin heavy chain 1	na	CLAH1_ARATH	Q0WNJ6	Q0WM81; Q9SRM1	CHC1	na	Arabidopsis thaliana (Mouse-ear cress)
High	Master Protein	GLYMA_10G199300		K05236 - coatomer protein complex, subunit alpha (xenin) (COPA) (1 of 5)	0	40.27	5	5	8	3	1218	136.6	6.96	17.93	5	2	0.949	0.999587	39.09	104.4	95.6	65.23	15.04	High	High	Peak Found	Peak Found	High	Peak Found	1		3	3	Present Both	1	GLYMA_10G199300	GLYMA_10G199300	sp|Q94A40|COPA1_ARATH	Coatomer subunit alpha-1 GN=COP1	ident:1011/1218 pos:1127/1218 query:1218 hit:1216 align:1221 bit:2129.0	OK	Coatomer subunit alpha-1	Alpha-coat protein 1 (Alpha-COP 1)	COPA1_ARATH	Q94A40	O80706	OrderedLocusNames=At1g62020	na	Arabidopsis thaliana (Mouse-ear cress)
High	Master Protein	GLYMA_11G113000		K05236 - coatomer protein complex, subunit alpha (xenin) (COPA) (1 of 5)	0	8.545	2	2	3	2	1221	136.7	6.96	6.01	2	0	0.01	1.31e-16		200				High	High	Not Found	Not Found	Not Found	High	1		2	1	Only Control	1	GLYMA_11G113000	GLYMA_11G113000	sp|Q94A40|COPA1_ARATH	Coatomer subunit alpha-1 GN=COP1	ident:1012/1221 pos:1125/1221 query:1221 hit:1216 align:1223 bit:2132.1	OK	Coatomer subunit alpha-1	Alpha-coat protein 1 (Alpha-COP 1)	COPA1_ARATH	Q94A40	O80706	OrderedLocusNames=At1g62020	na	Arabidopsis thaliana (Mouse-ear cress)
High	Master Protein	GLYMA_04G209000		K05546 - alpha 1,3-glucosidase (GANAB) (1 of 1)	0	89.827	14	12	55	12	914	103.9	6.4	163.25	12	0	1.265	0.970114	52.23	88.7	111.3	21.55	8.18	High	High	High	High	High	High	1		3	3	Present Both	1	GLYMA_04G209000	GLYMA_04G209000	sp|Q9FN05|PSL5_ARATH	Probable glucan 1,3-alpha-glucosidase GN=PSL5	ident:678/914 pos:775/914 query:914 hit:921 align:921 bit:1429.5	OK	Probable glucan 1,3-alpha-glucosidase	Glucosidase II subunit alpha; Protein PRIORITY IN SWEET LIFE 5; Protein RADIAL SWELLING 3	PSL5_ARATH	Q9FN05	na	PSL5	RSW3	Arabidopsis thaliana (Mouse-ear cress)
High	Master Protein	GLYMA_08G032500		K05759 - profilin (PFN) (1 of 8)	0	8.355	18	2	9	2	131	14.1	4.84	20.2	2	0	0.657	0.90463	28.52	104.7	95.3	43.56	26.95	High	High	High	High	High	High	1		3	3	Present Both	1	GLYMA_08G032500	GLYMA_08G032500	sp|Q42418|PROF2_ARATH	Profilin-2 GN=PRO2	ident:103/131 pos:114/131 query:131 hit:131 align:131 bit:225.3	OK	Profilin-2	na	PROF2_ARATH	Q42418	Q9FS48	PRO2	PFN2; PRF2	Arabidopsis thaliana (Mouse-ear cress)
High	Master Protein	GLYMA_15G163700		K05768 - gelsolin (GSN) (1 of 4)	0	37.416	10	8	17	3	963	107.7	6.32	38.08	8	0	0.954	0.999744	4.1	66.5	133.5	33.19	22.9	High	High	High	High	High	High	1		3	3	Present Both	1	GLYMA_15G163700	GLYMA_15G163700	sp|O65570|VILI4_ARATH	Villin-4 GN=VLN4	ident:745/963 pos:846/963 query:963 hit:974 align:978 bit:1508.8	OK	Villin-4	na	VILI4_ARATH	O65570	F4JPJ2; Q541Y5; Q9SZW9	VLN4	na	Arabidopsis thaliana (Mouse-ear cress)
High	Master Protein	GLYMA_12G205400		K05863 - solute carrier family 25 (mitochondrial adenine nucleotide translocator), member 4/5/6/31 (SLC25A4S, ANT) (1 of 12)	0	240.643	37	19	123	1	367	39.4	9.79	374.79	19	0	0.365	0.183803	6.17	149.3	50.7	34.23	28.6	High	High	High	High	High	High	1		3	3	Present Both	1	GLYMA_12G205400	GLYMA_12G205400	sp|O49447|ADT3_ARATH	ADP,ATP carrier protein 3, mitochondrial GN=AAC3	ident:309/367 pos:334/367 query:367 hit:379 align:376 bit:597.4	OK	ADP,ATP carrier protein 3, mitochondrial	ADP/ATP translocase 3; Adenine nucleotide translocator 3 (ANT 3)	ADT3_ARATH	O49447	Q8L9Y1	AAC3	ANT3	Arabidopsis thaliana (Mouse-ear cress)
High	Master Protein	GLYMA_13G295500		K05863 - solute carrier family 25 (mitochondrial adenine nucleotide translocator), member 4/5/6/31 (SLC25A4S, ANT) (1 of 12)	0	237.761	40	21	129	3	367	39.6	9.85	350.75	21	3	0.794	0.996833	28.35	140.8	59.2	53.64	68.12	High	High	High	High	High	High	1		3	3	Present Both	1	GLYMA_13G295500	GLYMA_13G295500	sp|O49447|ADT3_ARATH	ADP,ATP carrier protein 3, mitochondrial GN=AAC3	ident:311/367 pos:337/367 query:367 hit:379 align:376 bit:603.6	OK	ADP,ATP carrier protein 3, mitochondrial	ADP/ATP translocase 3; Adenine nucleotide translocator 3 (ANT 3)	ADT3_ARATH	O49447	Q8L9Y1	AAC3	ANT3	Arabidopsis thaliana (Mouse-ear cress)
High	Master Protein	GLYMA_03G026900		K06110 - exocyst complex component 3 (EXOC3, SEC6L1) (1 of 4)	0	33.866	8	5	17	5	756	86	4.88	42.86	5	0	0.614	0.833988	20.91	119.5	80.5	4.4	28.15	High	High	High	High	High	High	1	Acetyl [N-Term]	3	3	Present Both	1	GLYMA_03G026900	GLYMA_03G026900	sp|Q94AI6|SEC6_ARATH	Exocyst complex component SEC6 GN=SEC6	ident:674/756 pos:718/756 query:756 hit:752 align:756 bit:1379.4	OK	Exocyst complex component SEC6 (AtSec6)	na	SEC6_ARATH	Q94AI6	Q8RVQ6; Q9M9G4	SEC6	na	Arabidopsis thaliana (Mouse-ear cress)
High	Master Protein	GLYMA_09G024800		K06942 - uncharacterized protein (K06942) (1 of 3)	0	11.262	6	2	6	2	394	44.4	6.8	15.73	2	0	0.426	0.347295	8.31	139.2	60.8	29.6	34.39	High	High	High	Peak Found	High	High	1		3	3	Present Both	1	GLYMA_09G024800	GLYMA_09G024800	sp|Q9SA73|OLA1_ARATH	Obg-like ATPase 1 GN=YchF1	ident:341/394 pos:368/394 query:394 hit:394 align:394 bit:721.1	OK	Obg-like ATPase 1	Ribosome-binding ATPase YchF (AtYchF1)	OLA1_ARATH	Q9SA73	Q8LDR5	YchF1	na	Arabidopsis thaliana (Mouse-ear cress)
High	Master Protein	GLYMA_02G160500		K07213 - copper chaperone (ATOX1, ATX1, copZ) (1 of 4)	0	39.977	32	4	13	3	130	13.6	4.7	31.08	4	0	2.022	0.412136	63.68	95.6	104.4	54.63	108.56	High	High	High	Peak Found	High	High	1		3	3	Present Both	1	GLYMA_02G160500	GLYMA_02G160500	sp|O82089|CCH_ARATH	Copper transport protein CCH GN=CCH	ident:56/130 pos:62/130 query:130 hit:121 align:66 bit:125.2	Poor_match	Copper transport protein CCH	Copper chaperone CCH	CCH_ARATH	O82089	na	CCH	na	Arabidopsis thaliana (Mouse-ear cress)
High	Master Protein	GLYMA_10G203200		K07213 - copper chaperone (ATOX1, ATX1, copZ) (1 of 4)	0	53.146	64	4	13	2	81	8.6	6.6	44.7	4	2	0.87	0.996833	68.43	119.7	80.3	9.48	92.06	High	High	High	Peak Found	High	High	1		3	3	Present Both	1	GLYMA_10G203200	GLYMA_10G203200	sp|Q94BT9|ATOX1_ARATH	Copper transport protein ATX1 GN=ATX1	ident:58/81 pos:68/81 query:81 hit:76 align:75 bit:125.9	OK	Copper transport protein ATX1	Copper chaperone ATX1	ATOX1_ARATH	Q94BT9	C0Z3B8; Q9C7U6	ATX1	na	Arabidopsis thaliana (Mouse-ear cress)
High	Master Protein	GLYMA_05G064300		K07874 - Ras-related protein Rab-1A (RAB1A) (1 of 7)	0	54.744	55	9	30	4	202	22.6	5.71	63.41	9	3	1.037	0.996833	42.1	62.2	137.8	70.09	41.35	High	High	High	High	High	High	1	Acetyl [N-Term]	3	3	Present Both	1	GLYMA_05G064300	GLYMA_05G064300	sp|Q9SEH3|RAD2C_ARATH	Ras-related protein RABD2c GN=RABD2C	ident:183/202 pos:192/202 query:202 hit:202 align:202 bit:390.6	OK	Ras-related protein RABD2c (AtRABD2c)	Ras-related protein Rab1C (AtRab1C)	RAD2C_ARATH	Q9SEH3	O23594; Q8W4S8	RABD2C	RAB1C	Arabidopsis thaliana (Mouse-ear cress)
High	Master Protein	GLYMA_18G251300		K07874 - Ras-related protein Rab-1A (RAB1A) (1 of 7)	0	25.601	36	6	18	1	202	22.4	5.16	35.17	6	0	1.084	0.996833	42.2	95.5	104.5	49.91	27.92	High	Peak Found	High	Peak Found	High	Peak Found	1	Acetyl [N-Term]	3	3	Present Both	1	GLYMA_18G251300	GLYMA_18G251300	sp|P28188|RAD2A_ARATH	Ras-related protein RABD2a GN=RABD2A	ident:191/202 pos:197/202 query:202 hit:203 align:203 bit:399.4	OK	Ras-related protein RABD2a (AtRABD2a)	Ras-related protein Ara-5; Ras-related protein Rab1B (AtRab1B)	RAD2A_ARATH	P28188	Q940Z7	RABD2A	ARA-5; RAB1B	Arabidopsis thaliana (Mouse-ear cress)
High	Master Protein	GLYMA_13G153000		K07889 - Ras-related protein Rab-5C (RAB5C) (1 of 3)	0	26.369	23	3	13	3	233	25.6	7.3	41.37	3	0	0.699	0.946051	22.94	117	83	49.84	12.32	High	High	High	High	High	High	1		3	3	Present Both	1	GLYMA_13G153000	GLYMA_13G153000	sp|P31582|RAF2A_ARATH	Ras-related protein RABF2a GN=RABF2A	ident:155/233 pos:168/233 query:233 hit:200 align:187 bit:326.2	OK	Ras-related protein RABF2a (AtRABF2a)	Ras-related protein Rab5A (AtRab5A); Ras-related protein Rha1	RAF2A_ARATH	P31582	na	RABF2A	RAB5A; RHA1	Arabidopsis thaliana (Mouse-ear cress)
High	Master Protein	GLYMA_04G069200		K07936 - GTP-binding nuclear protein Ran (RAN) (1 of 7)	0	27.819	12	3	24	3	290	33.1	8.41	62.86	3	0	0.565	0.741946	17.93	134.3	65.7	37.17	29.25	High	High	High	High	High	High	1		3	3	Present Both	1	GLYMA_04G069200	GLYMA_04G069200	sp|Q8H156|RAN3_ARATH	GTP-binding nuclear protein Ran-3 GN=RAN3	ident:217/290 pos:219/290 query:290 hit:221 align:221 bit:461.1	OK	GTP-binding nuclear protein Ran-3	Ras-related nuclear protein 3	RAN3_ARATH	Q8H156	O04148; O04664; O22495	RAN3	na	Arabidopsis thaliana (Mouse-ear cress)
High	Master Protein	GLYMA_02G009600		K07937//K07977 - ADP-ribosylation factor 1 (ARF1) // Arf/Sar family, other (ARF) (1 of 11)	0	11.204	15	3	8	3	223	25.7	8.38	18.23	3	0	0.739	0.970114	20.47	142.6	57.4	55.52	35.78	High	High	High	High	High	Peak Found	1		3	3	Present Both	1	GLYMA_02G009600	GLYMA_02G009600	sp|Q9LQC8|ARF2A_ARATH	ADP-ribosylation factor 2-A GN=ARF2-A	ident:178/223 pos:178/223 query:223 hit:181 align:181 bit:370.2	OK	ADP-ribosylation factor 2-A (AtARF2)	na	ARF2A_ARATH	Q9LQC8	Q9S9K6; Q9SGY6; Q9SRC3	ARF2-A	ARFA1-A; ARFA2-A	Arabidopsis thaliana (Mouse-ear cress)
High	Master Protein	GLYMA_01G194500		K07955 - ADP-ribosylation factor-like protein 8 (ARL8) (1 of 5)	0	22.309	40	5	9	5	184	20.5	8.15	27.29	5	0	0.966	0.996833	77.72	91.1	108.9	66.49	29.49	High	High	Peak Found	High	High	High	1		3	3	Present Both	1	GLYMA_01G194500	GLYMA_01G194500	sp|Q8VY57|ARL8A_ARATH	ADP-ribosylation factor-like protein 8a GN=ARL8A	ident:169/184 pos:177/184 query:184 hit:184 align:184 bit:351.3	OK	ADP-ribosylation factor-like protein 8a (AtARL8a)	ADP-ribosylation factor-like A1C (AtARLA1C)	ARL8A_ARATH	Q8VY57	Q9M2X1	ARL8A	na	Arabidopsis thaliana (Mouse-ear cress)
High	Master Protein	GLYMA_16G075400		K08488 - syntaxin 7 (STX7) (1 of 6)	0	104.84	34	14	54	6	273	30	6.32	171.39	14	7	1.234	0.970114	58.97	76.7	123.3	42.36	18.78	High	High	High	High	High	High	1		3	3	Present Both	1	GLYMA_16G075400	GLYMA_16G075400	sp|P93654|SYP22_ARATH	Syntaxin-22 GN=SYP22	ident:206/273 pos:232/273 query:273 hit:268 align:261 bit:417.9	OK	Syntaxin-22 (AtSYP22; AtVAM3)	Protein SHOOT GRAVITROPISM 3	SYP22_ARATH	P93654	na	SYP22	SGR3; VAM3	Arabidopsis thaliana (Mouse-ear cress)
High	Master Protein	GLYMA_13G138900		K08506 - syntaxin of plants SYP7 (SYP7) (1 of 6)	0	87.527	42	13	52	8	265	29.8	6.19	140.14	13	5	1.222	0.971564	54.9	84.1	115.9	41.73	29.82	High	High	High	High	High	High	1		3	3	Present Both	1	GLYMA_13G138900	GLYMA_13G138900	sp|Q9SF29|SYP71_ARATH	Syntaxin-71 GN=SYP71	ident:208/265 pos:237/265 query:265 hit:266 align:266 bit:432.9	OK	Syntaxin-71 (AtSYP71)	na	SYP71_ARATH	Q9SF29	na	SYP71	na	Arabidopsis thaliana (Mouse-ear cress)
High	Master Protein	GLYMA_14G035500		K08515 - vesicle-associated membrane protein 7 (VAMP7) (1 of 6)	0	38.092	32	4	17	4	219	25	9.42	72.67	4	0	1.21	0.977957	26.65	81.6	118.4	15.24	17.06	High	High	High	High	High	High	1		3	3	Present Both	1	GLYMA_14G035500	GLYMA_14G035500	sp|Q9LFP1|VA713_ARATH	Vesicle-associated membrane protein 713 GN=VAMP713	ident:175/219 pos:207/219 query:219 hit:221 align:220 bit:390.2	OK	Vesicle-associated membrane protein 713 (AtVAMP713)	na	VA713_ARATH	Q9LFP1	na	VAMP713	na	Arabidopsis thaliana (Mouse-ear cress)
High	Master Protein	GLYMA_03G114600		K08901 - photosystem II oxygen-evolving enhancer protein 3 (psbQ) (1 of 4)	0	13.944	12	2	5	1	232	24.8	9.85	14.63	2	0	0.235	0.0129329	8.22	162	38	100.29		High	High	Not Found	Not Found	Not Found	High	1		2	1	Only Control	1	GLYMA_03G114600	GLYMA_03G114600	sp|Q41932|PSBQ2_ARATH	Oxygen-evolving enhancer protein 3-2, chloroplastic GN=PSBQ2	ident:163/232 pos:190/232 query:232 hit:230 align:236 bit:312.0	OK	Oxygen-evolving enhancer protein 3-2, chloroplastic (OEE3)	16 kDa subunit of oxygen evolving system of photosystem II; OEC 16 kDa subunit	PSBQ2_ARATH	Q41932	Q9M0X7	PSBQ2	PSBQB	Arabidopsis thaliana (Mouse-ear cress)
High	Master Protein	GLYMA_07G112000		K08901 - photosystem II oxygen-evolving enhancer protein 3 (psbQ) (1 of 4)	0	19.445	21	3	4	2	234	24.9	9.8	11.84	3	1	0.608	0.820214	46.45	128.6	71.4	64.01	68.84	High	Not Found	Not Found	Not Found	Not Found	High	1		1	1	Missing Both	1	GLYMA_07G112000	GLYMA_07G112000	sp|Q41932|PSBQ2_ARATH	Oxygen-evolving enhancer protein 3-2, chloroplastic GN=PSBQ2	ident:167/234 pos:194/234 query:234 hit:230 align:235 bit:324.7	OK	Oxygen-evolving enhancer protein 3-2, chloroplastic (OEE3)	16 kDa subunit of oxygen evolving system of photosystem II; OEC 16 kDa subunit	PSBQ2_ARATH	Q41932	Q9M0X7	PSBQ2	PSBQB	Arabidopsis thaliana (Mouse-ear cress)
High	Master Protein	GLYMA_13G299200		K08902 - photosystem II Psb27 protein (psb27) (1 of 2)	0	11.875	21	2	2	2	169	18.6	9.94	6.4	2	0	0.01	1.31e-16		200				High	Not Found	Not Found	Not Found	Not Found	Not Found	1		1	0	Missing Both	1	GLYMA_13G299200	GLYMA_13G299200	sp|Q9LR64|PB27A_ARATH	Photosystem II repair protein PSB27-H1, chloroplastic GN=PSB27-1	ident:96/169 pos:111/169 query:169 hit:174 align:138 bit:193.7	OK	Photosystem II repair protein PSB27-H1, chloroplastic (Psb27-H1)	Thylakoid lumenal protein PSB27-H1	PB27A_ARATH	Q9LR64	Q9FPJ9	PSB27-1	na	Arabidopsis thaliana (Mouse-ear cress)
High	Master Protein	GLYMA_10G040600		K08903 - photosystem II 13kDa protein (psb28) (1 of 2)	0	15.634	16	2	3	2	179	20.1	9.04	7.97	2	0	0.01	1.31e-16		200				High	High	Not Found	Not Found	Not Found	Not Found	1		2	0	Only Control	1	GLYMA_10G040600	GLYMA_10G040600	sp|Q8W0Y8|PSB28_ARATH	Photosystem II reaction center PSB28 protein, chloroplastic GN=PSB28	ident:108/179 pos:136/179 query:179 hit:183 align:182 bit:210.3	OK	Photosystem II reaction center PSB28 protein, chloroplastic	Photosystem II protein W-like	PSB28_ARATH	Q8W0Y8	Q9M0G6	PSB28	na	Arabidopsis thaliana (Mouse-ear cress)
High	Master Protein	GLYMA_08G082900		K08912 - light-harvesting complex II chlorophyll a/b binding protein 1 (LHCB1) (1 of 5)	0.004	2.152	5	1	1	1	263	27.9	5.43	1.68	1	0	0.503	0.574039	4.46	137.6	62.4	18.11	15.19	High	Peak Found	Peak Found	Peak Found	Peak Found	Peak Found	1		3	3	Present Both	1	GLYMA_08G082900	GLYMA_08G082900	sp|P04778|CB1C_ARATH	Chlorophyll a-b binding protein 1, chloroplastic GN=LHCB1.3	ident:236/263 pos:249/263 query:263 hit:267 align:266 bit:472.2	OK	Chlorophyll a-b binding protein 1, chloroplastic	Chlorophyll a-b protein 140 (CAB-140); LHCII type I CAB-1	CB1C_ARATH	P04778	P83754	LHCB1.3	AB140; CAB1	Arabidopsis thaliana (Mouse-ear cress)
High	Master Protein	GLYMA_14G007700		K09487 - heat shock protein 90kDa beta (HSP90B, TRA1) (1 of 6)	0	42.196	8	5	19	2	797	90.4	5.26	54.37	5	0	0.371	0.199756	2.88	149.9	50.1	16.74	19.2	High	High	High	High	High	Peak Found	1		3	3	Present Both	1	GLYMA_14G007700	GLYMA_14G007700	sp|F4JFN3|HS906_ARATH	Heat shock protein 90-6, mitochondrial GN=HSP90-6	ident:619/797 pos:705/797 query:797 hit:799 align:810 bit:1208.7	OK	Heat shock protein 90-6, mitochondrial (AtHSP90.6; AtHsp90-6)	Heat shock protein 89-1 (Hsp89-1)	HS906_ARATH	F4JFN3	A0A1I9LN11; Q0WRS4; Q9S7E7	HSP90-6	na	Arabidopsis thaliana (Mouse-ear cress)
High	Master Protein	GLYMA_11G185500		K09494 - T-complex protein 1 subunit beta (CCT2) (1 of 2)	0	48.785	14	5	20	5	527	57	5.8	57.31	5	0	0.807	0.996833	56.16	102.6	97.4	31.11	11.51	High	High	High	High	High	High	1		3	3	Present Both	1	GLYMA_11G185500	GLYMA_11G185500	sp|Q940P8|TCPB_ARATH	T-complex protein 1 subunit beta GN=CCT2	ident:468/527 pos:501/527 query:527 hit:527 align:527 bit:940.6	OK	T-complex protein 1 subunit beta (TCP-1-beta)	CCT-beta; Chaperonin CCT2	TCPB_ARATH	Q940P8	na	CCT2	na	Arabidopsis thaliana (Mouse-ear cress)
High	Master Protein	GLYMA_09G158200		K09495 - T-complex protein 1 subunit gamma (CCT3, TRIC5) (1 of 5)	0	4.451	3	2	4	1	554	60.2	6.27	5.76	2	1	0.905	0.996833	38.71	72.5	127.5	69.98	46.7	High	High	Peak Found	Peak Found	Peak Found	High	1		3	3	Present Both	1	GLYMA_09G158200	GLYMA_09G158200	sp|Q84WV1|TCPG_ARATH	T-complex protein 1 subunit gamma GN=CCT3	ident:484/554 pos:520/554 query:554 hit:555 align:555 bit:983.4	OK	T-complex protein 1 subunit gamma (TCP-1-gamma)	CCT-gamma; Chaperonin CCT3	TCPG_ARATH	Q84WV1	O81503	CCT3	na	Arabidopsis thaliana (Mouse-ear cress)
High	Master Protein	GLYMA_16G208700		K09495 - T-complex protein 1 subunit gamma (CCT3, TRIC5) (1 of 5)	0	22.606	5	2	8	1	554	60.2	6.18	28.49	2	0	0.306	0.0746187	6.35	153.2	46.8	55.61	32.19	High	High	High	High	High	High	1		3	3	Present Both	1	GLYMA_16G208700	GLYMA_16G208700	sp|Q84WV1|TCPG_ARATH	T-complex protein 1 subunit gamma GN=CCT3	ident:486/554 pos:523/554 query:554 hit:555 align:555 bit:987.3	OK	T-complex protein 1 subunit gamma (TCP-1-gamma)	CCT-gamma; Chaperonin CCT3	TCPG_ARATH	Q84WV1	O81503	CCT3	na	Arabidopsis thaliana (Mouse-ear cress)
High	Master Protein	GLYMA_08G364000		K09498 - T-complex protein 1 subunit zeta (CCT6) (1 of 3)	0	82.491	19	8	35	8	535	58.9	5.85	120.13	8	0	0.611	0.826526	23.82	133.8	66.2	22.99	16.79	High	High	High	High	High	High	1		3	3	Present Both	1	GLYMA_08G364000	GLYMA_08G364000	sp|Q9M888|TCPZA_ARATH	T-complex protein 1 subunit zeta 1 GN=CCT6A	ident:483/535 pos:516/535 query:535 hit:535 align:535 bit:1007.3	OK	T-complex protein 1 subunit zeta 1 (TCP-1-zeta 1)	CCT-zeta 1; Chaperonin CCT6A	TCPZA_ARATH	Q9M888	Q8LFN3; Q94EZ9	CCT6A	na	Arabidopsis thaliana (Mouse-ear cress)
High	Master Protein	GLYMA_05G051600		K09560 - suppressor of tumorigenicity protein 13 (ST13) (1 of 3)	0	29.83	20	5	6	5	400	43.1	4.97	18.02	5	0	0.563	0.738036	20.46	119.3	80.7	81.86	46.51	High	High	Peak Found	Peak Found	High	Peak Found	1		3	3	Present Both	1	GLYMA_05G051600	GLYMA_05G051600	sp|Q93YR3|F10AL_ARATH	FAM10 family protein At4g22670 GN=EXT3	ident:208/400 pos:245/400 query:400 hit:441 align:282 bit:391.0	OK	FAM10 family protein At4g22670	na	F10AL_ARATH	Q93YR3	O49648	OrderedLocusNames=At4g22670	na	Arabidopsis thaliana (Mouse-ear cress)
High	Master Protein	GLYMA_16G129900		K09578 - peptidyl-prolyl cis-trans isomerase NIMA-interacting 1 (PIN1) (1 of 2)	0	13.715	27	3	8	1	126	13.6	9.54	16.59	3	2	0.699	0.946051	24.39	138.6	61.4	22.53	98.83	High	High	Peak Found	Not Found	High	High	1		3	2	Present Both	1	GLYMA_16G129900	GLYMA_16G129900	sp|Q9SL42|PIN1_ARATH	Peptidyl-prolyl cis-trans isomerase Pin1 GN=PIN1	ident:94/126 pos:108/126 query:126 hit:119 align:113 bit:200.7	OK	Peptidyl-prolyl cis-trans isomerase Pin1 (PPIase Pin1)	PIN1At; Rotamase Pin1	PIN1_ARATH	Q9SL42	Q42334	PIN1	na	Arabidopsis thaliana (Mouse-ear cress)
High	Master Protein	GLYMA_02G014000		K09584 - protein disulfide-isomerase A6 (PDIA6, TXNDC7) (1 of 6)	0	104.63	35	17	63	5	364	40.4	5.59	166.43	17	9	1.062	0.996833	63.01	80.1	119.9	46.25	11.04	High	High	High	High	High	High	1		3	3	Present Both	1	GLYMA_02G014000	GLYMA_02G014000	sp|O22263|PDI21_ARATH	Protein disulfide-isomerase like 2-1 GN=PDIL2-1	ident:261/364 pos:296/364 query:364 hit:361 align:332 bit:550.4	OK	Protein disulfide-isomerase like 2-1 (AtPDIL2-1)	P5; Protein MATERNAL EFFECT EMBRYO ARREST 30; Protein UNFERTILIZED EMBRYO SAC 5; Protein disulfide isomerase 11 (AtPDI11); Protein disulfide-isomerase A6; Protein disulfide-isomerase like 4-1 (AtPDIL4-1)	PDI21_ARATH	O22263	Q546R3	PDIL2-1	MEE30; PDI11; PDIL4-1; UNE5	Arabidopsis thaliana (Mouse-ear cress)
High	Master Protein	GLYMA_10G014700		K09584 - protein disulfide-isomerase A6 (PDIA6, TXNDC7) (1 of 6)	0	84.225	35	14	60	2	364	40.3	5.92	141.79	14	0	0.762	0.993528	47.48	105.4	94.6	13.55	35.16	High	High	High	High	High	High	1		3	3	Present Both	1	GLYMA_10G014700	GLYMA_10G014700	sp|O22263|PDI21_ARATH	Protein disulfide-isomerase like 2-1 GN=PDIL2-1	ident:262/364 pos:295/364 query:364 hit:361 align:332 bit:551.2	OK	Protein disulfide-isomerase like 2-1 (AtPDIL2-1)	P5; Protein MATERNAL EFFECT EMBRYO ARREST 30; Protein UNFERTILIZED EMBRYO SAC 5; Protein disulfide isomerase 11 (AtPDI11); Protein disulfide-isomerase A6; Protein disulfide-isomerase like 4-1 (AtPDIL4-1)	PDI21_ARATH	O22263	Q546R3	PDIL2-1	MEE30; PDI11; PDIL4-1; UNE5	Arabidopsis thaliana (Mouse-ear cress)
High	Master Protein	GLYMA_09G043100		K10418 - dynein light chain LC8-type (DYNLL) (1 of 16)	0	14.467	13	1	3	1	157	17.8	9.51	9.25	1	0	0.01	1.31e-16		200		15.65		High	High	Not Found	Not Found	Not Found	Not Found	1		2	0	Only Control	1	GLYMA_09G043100	GLYMA_09G043100	sp|Q5G5E0|PIRL5_ARATH	Plant intracellular Ras-group-related LRR protein 5 GN=PIRL5	ident:13/157 pos:18/157 query:157 hit:526 align:33 bit:29.3	Partial_match_both	Plant intracellular Ras-group-related LRR protein 5	na	PIRL5_ARATH	Q5G5E0	na	PIRL5	na	Arabidopsis thaliana (Mouse-ear cress)
High	Master Protein	GLYMA_19G044900		K10525 - allene oxide cyclase (AOC) (1 of 6)	0	26.189	14	3	8	3	257	28	8.57	29.03	3	0	0.525	0.636261	10.26	134.2	65.8	50.28	44.92	High	High	High	High	High	High	1		3	3	Present Both	1	GLYMA_19G044900	GLYMA_19G044900	sp|Q9LS01|AOC3_ARATH	Allene oxide cyclase 3, chloroplastic GN=AOC3	ident:145/257 pos:185/257 query:257 hit:258 align:268 bit:257.3	OK	Allene oxide cyclase 3, chloroplastic	na	AOC3_ARATH	Q9LS01	na	AOC3	na	Arabidopsis thaliana (Mouse-ear cress)
Medium	Master Protein	GLYMA_13G059200		K10597 - ubiquitin conjugation factor E4 B (UBE4B, UFD2) (1 of 2)	0.015	1.548	1	1	3	1	1038	117.4	5.88	7.25	1	0	0.941	0.997696	16.73	103.4	96.6	20.98	14.84	High	Peak Found	Peak Found	Peak Found	High	High	1		3	3	Present Both	1	GLYMA_13G059200	GLYMA_13G059200	sp|Q9LF41|UBE4_ARATH	Probable ubiquitin conjugation factor E4 GN=PUB1	ident:790/1038 pos:899/1038 query:1038 hit:1038 align:1050 bit:1615.1	OK	Probable ubiquitin conjugation factor E4	Plant U-box protein 1; RING-type E3 ubiquitin transferase E4; U-box domain-containing protein 1; Ubiquitin-fusion degradation protein 2-like (UB fusion protein 2-like)	UBE4_ARATH	Q9LF41	na	PUB1	UFD2	Arabidopsis thaliana (Mouse-ear cress)
High	Master Protein	GLYMA_02G288900		K11086 - small nuclear ribonucleoprotein B and B' (SNRPB, SMB) (1 of 2)	0	43.481	17	6	28	6	282	29.4	11.28	60.39	6	0	1.205	0.977957	68.87	80	120	22.68	10.31	High	High	High	High	High	High	1		3	3	Present Both	1	GLYMA_02G288900	GLYMA_02G288900	sp|Q9C6K5|LSM3B_ARATH	Sm-like protein LSM3B GN=LSM3B	ident:24/282 pos:40/282 query:282 hit:98 align:70 bit:47.4	Partial_match_query	Sm-like protein LSM3B (AtLSM3B)	U6 snRNA-associated Sm-like protein LSM3B	LSM3B_ARATH	Q9C6K5	na	LSM3B	na	Arabidopsis thaliana (Mouse-ear cress)
High	Master Protein	GLYMA_05G185800		K11088 - small nuclear ribonucleoprotein D3 (SNRPD3, SMD3) (1 of 2)	0	77.958	34	5	39	5	131	14.2	10.42	129.42	5	0	0.938	0.996833	45.12	104.8	95.2	66.19	22.36	High	High	High	High	High	High	1		3	3	Present Both	1	GLYMA_05G185800	GLYMA_05G185800	sp|Q9LM92|SMD3B_ARATH	Small nuclear ribonucleoprotein SmD3b GN=SMD3B	ident:112/131 pos:116/131 query:131 hit:131 align:132 bit:213.4	OK	Small nuclear ribonucleoprotein SmD3b (SmD3-b)	snRNP core protein D3-b	SMD3B_ARATH	Q9LM92	Q8LC48; Q9LMW6	SMD3B	na	Arabidopsis thaliana (Mouse-ear cress)
High	Master Protein	GLYMA_05G240800		K11096 - small nuclear ribonucleoprotein D2 (SNRPD2, SMD2) (1 of 2)	0	15.682	19	3	13	3	108	12.5	9.86	31.3	3	0	1.584	0.75101	72.14	88.7	111.3	46.58	11.78	High	High	High	High	High	High	1		3	3	Present Both	1	GLYMA_05G240800	GLYMA_05G240800	sp|Q9C6K5|LSM3B_ARATH	Sm-like protein LSM3B GN=LSM3B	ident:30/108 pos:53/108 query:108 hit:98 align:91 bit:52.8	Poor_match	Sm-like protein LSM3B (AtLSM3B)	U6 snRNA-associated Sm-like protein LSM3B	LSM3B_ARATH	Q9C6K5	na	LSM3B	na	Arabidopsis thaliana (Mouse-ear cress)
High	Master Protein	GLYMA_06G157100		K11097 - small nuclear ribonucleoprotein E (SNRPE, SME) (1 of 4)	0	66.797	65	5	33	5	88	10.3	9.99	60.65	5	0	0.985	0.996833	80.93	122.8	77.2	49.31	27.27	High	High	High	High	High	High	1		3	3	Present Both	1	GLYMA_06G157100	GLYMA_06G157100	sp|Q9FKB0|LSM5_ARATH	Sm-like protein LSM5 GN=LSM5	ident:28/88 pos:44/88 query:88 hit:88 align:78 bit:47.4	Poor_match	Sm-like protein LSM5 (AtLSM5)	Protein SUPERSENSITIVE TO ABA AND DROUGHT 1 (AtSAD1); U6 snRNA-associated Sm-like protein LSM5	LSM5_ARATH	Q9FKB0	Q0WMZ9	LSM5	na	Arabidopsis thaliana (Mouse-ear cress)
High	Master Protein	GLYMA_11G086200		K11099 - small nuclear ribonucleoprotein G (SNRPG, SMG) (1 of 3)	0	88.301	67	6	32	2	79	8.8	9.25	103.12	6	6	0.631	0.862691	30.8	136.8	63.2	50.98	24.74	High	High	High	High	High	High	1		3	3	Present Both	1	GLYMA_11G086200	GLYMA_11G086200	sp|O82221|RUXG_ARATH	Probable small nuclear ribonucleoprotein G GN=RXW24L	ident:71/79 pos:75/79 query:79 hit:80 align:79 bit:148.3	OK	Probable small nuclear ribonucleoprotein G (snRNP-G)	Sm protein G (Sm-G; SmG)	RUXG_ARATH	O82221	na	OrderedLocusNames=At2g23930	na	Arabidopsis thaliana (Mouse-ear cress)
High	Master Protein	GLYMA_19G195100		K11099 - small nuclear ribonucleoprotein G (SNRPG, SMG) (1 of 3)	0	91.507	67	6	39	2	79	8.8	9.25	136.53	6	0	0.693	0.945815	38.08	130.7	69.3	37.3	31.54	High	High	High	High	High	High	1		3	3	Present Both	1	GLYMA_19G195100	GLYMA_19G195100	sp|O82221|RUXG_ARATH	Probable small nuclear ribonucleoprotein G GN=RXW24L	ident:73/79 pos:76/79 query:79 hit:80 align:79 bit:150.6	OK	Probable small nuclear ribonucleoprotein G (snRNP-G)	Sm protein G (Sm-G; SmG)	RUXG_ARATH	O82221	na	OrderedLocusNames=At2g23930	na	Arabidopsis thaliana (Mouse-ear cress)
High	Master Protein	GLYMA_03G164500		K11130 - H/ACA ribonucleoprotein complex subunit 3 (NOP10, NOLA3) (1 of 2)	0	93.335	89	8	45	5	64	7.5	9.85	147.76	8	2	0.594	0.79392	19.2	138.5	61.5	39.71	14.78	High	High	High	High	High	High	1		3	3	Present Both	1	GLYMA_03G164500	GLYMA_03G164500	sp|Q93XX8|NOP10_ARATH	H/ACA ribonucleoprotein complex subunit 3-like protein GN=NUP205	ident:52/64 pos:58/64 query:64 hit:64 align:64 bit:111.3	OK	H/ACA ribonucleoprotein complex subunit 3-like protein	Nucleolar protein 10	NOP10_ARATH	Q93XX8	Q9SIM0	OrderedLocusNames=At2g20490	na	Arabidopsis thaliana (Mouse-ear cress)
High	Master Protein	GLYMA_19G165900		K11130 - H/ACA ribonucleoprotein complex subunit 3 (NOP10, NOLA3) (1 of 2)	0	36.797	33	5	18	2	120	13.8	9.52	51.97	5	0	0.726	0.970114	33.03	121.5	78.5	54.72	27.74	High	High	Peak Found	Peak Found	High	Peak Found	1		3	3	Present Both	1	GLYMA_19G165900	GLYMA_19G165900	sp|Q93XX8|NOP10_ARATH	H/ACA ribonucleoprotein complex subunit 3-like protein GN=NUP205	ident:52/120 pos:58/120 query:120 hit:64 align:64 bit:110.2	Poor_match	H/ACA ribonucleoprotein complex subunit 3-like protein	Nucleolar protein 10	NOP10_ARATH	Q93XX8	Q9SIM0	OrderedLocusNames=At2g20490	na	Arabidopsis thaliana (Mouse-ear cress)
High	Master Protein	GLYMA_01G022100		K11251 - histone H2A (H2A) (1 of 24)	0	130.368	56	7	45	4	135	14	10.05	182.22	7	0	0.541	0.684306	20.72	147.1	52.9	73.01	34.79	High	High	High	High	High	High	1		3	3	Present Both	1	GLYMA_01G022100	GLYMA_01G022100	sp|Q9LD28|H2A6_ARATH	Histone H2A.6 GN=RAT5	ident:122/135 pos:122/135 query:135 hit:130 align:125 bit:241.9	OK	Histone H2A.6	HTA1; Protein RESISTANT TO AGROBACTERIUM TRANSFORMATION 5	H2A6_ARATH	Q9LD28	na	RAT5	H2A-1	Arabidopsis thaliana (Mouse-ear cress)
High	Master Protein	GLYMA_06G071500		K11251 - histone H2A (H2A) (1 of 24)	0	101.468	53	8	28	2	136	14.4	10.32	94.59	8	6	0.942	0.997905	63.4	107.1	92.9	55.36	27.85	High	High	Not Found	Not Found	Not Found	High	1		2	1	Only Control	1	GLYMA_06G071500	GLYMA_06G071500	sp|Q9C944|H2AV3_ARATH	Probable histone H2A variant 3 GN=FAB1C	ident:120/136 pos:129/136 query:136 hit:134 align:136 bit:222.2	OK	Probable histone H2A variant 3	H2A.F/Z 3; HTA9	H2AV3_ARATH	Q9C944	na	OrderedLocusNames=At1g52740	na	Arabidopsis thaliana (Mouse-ear cress)
High	Master Protein	GLYMA_13G334300		K11251 - histone H2A (H2A) (1 of 24)	0	117.021	56	8	32	6	149	15.7	10.67	141.57	8	1	1.201	0.980026	104.74	141.8	58.2	70.3	44.59	High	High	High	High	High	High	1	Acetyl [N-Term]	3	3	Present Both	1	GLYMA_13G334300	GLYMA_13G334300	sp|Q9LZ46|H2A4_ARATH	Probable histone H2A.4 GN=EZA1	ident:133/149 pos:143/149 query:149 hit:153 align:153 bit:242.3	OK	Probable histone H2A.4	HTA12	H2A4_ARATH	Q9LZ46	na	OrderedLocusNames=At5g02560	na	Arabidopsis thaliana (Mouse-ear cress)
High	Master Protein	GLYMA_19G239200		K11251 - histone H2A (H2A) (1 of 24)	0	115.746	62	8	47	5	140	14.7	10.36	166.22	8	2	1.107	0.996833	70.57	77.4	122.6	47.45	18.04	High	High	High	High	High	High	1		3	3	Present Both	1	GLYMA_19G239200	GLYMA_19G239200	sp|Q9S9K7|H2AXB_ARATH	Probable histone H2AXb GN=EZA1	ident:132/140 pos:134/140 query:140 hit:142 align:142 bit:256.9	OK	Probable histone H2AXb	HTA3	H2AXB_ARATH	Q9S9K7	na	OrderedLocusNames=At1g54690	na	Arabidopsis thaliana (Mouse-ear cress)
High	Master Protein	GLYMA_12G065100		K11252 - histone H2B (H2B) (1 of 16)	0	85.235	60	9	46	1	149	16.3	10.08	145.42	9	8	0.979	0.996833	92.23	110.8	89.2	50.65	36.1	High	High	Not Found	Not Found	High	High	1		2	2	Present Both	1	GLYMA_12G065100	GLYMA_12G065100	sp|O23629|H2B6_ARATH	Histone H2B.6 GN=H2B	ident:132/149 pos:138/149 query:149 hit:150 align:152 bit:238.8	OK	Histone H2B.6	H2BAt; HTB9	H2B6_ARATH	O23629	na	H2B	na	Arabidopsis thaliana (Mouse-ear cress)
High	Master Protein	GLYMA_11G241700		K11253 - histone H3 (H3) (1 of 22)	0	17.121	12	5	26	5	265	30.5	10.1	43.3	5	0	2.026	0.410937	48.9	73.6	126.4	30.42	14.86	High	High	High	High	High	High	1		3	3	Present Both	1	GLYMA_11G241700	GLYMA_11G241700	sp|P59169|H33_ARATH	Histone H3.3 GN=HTR8	ident:136/265 pos:136/265 query:265 hit:136 align:136 bit:274.6	Poor_match	Histone H3.3	Histone H3.2	H33_ARATH	P59169	Q6NR95	HTR4	na	Arabidopsis thaliana (Mouse-ear cress)
High	Master Protein	GLYMA_19G172500		K11254 - histone H4 (H4) (1 of 20)	0	147.484	38	12	101	12	156	17.9	11.36	307.82	12	0	1.725	0.63697	68.79	88.3	111.7	45.24	33.35	High	High	High	High	High	High	1		3	3	Present Both	1	GLYMA_19G172500	GLYMA_19G172500	sp|P59259|H4_ARATH	Histone H4 GN=GXM1	ident:103/156 pos:103/156 query:156 hit:103 align:103 bit:203.4	OK	Histone H4	na	H4_ARATH	P59259	P02308	OrderedLocusNames=At1g07660	na	Arabidopsis thaliana (Mouse-ear cress)
High	Master Protein	GLYMA_11G101500		K11294 - nucleolin (NCL, NSR1) (1 of 11)	0	92.101	19	12	43	6	748	78.3	5.58	148.19	12	6	0.962	0.997696	70.91	108.8	91.2	2.79	16.04	High	High	High	High	High	High	1		3	3	Present Both	1	GLYMA_11G101500	GLYMA_11G101500	sp|Q1PEP5|NUCL2_ARATH	Nucleolin 2 GN=NUCL2	ident:143/748 pos:189/748 query:748 hit:636 align:307 bit:256.5	Partial_match_both	Nucleolin 2	Protein NUCLEOLIN LIKE 2 (AtNUC-L2); Protein PARALLEL LIKE 1 (AtPARLL1)	NUCL2_ARATH	Q1PEP5	Q9LIH8	NUCL2	PARLL1	Arabidopsis thaliana (Mouse-ear cress)
High	Master Protein	GLYMA_12G027400		K11294 - nucleolin (NCL, NSR1) (1 of 11)	0	89.072	16	11	42	5	744	77.5	5.49	138.74	11	0	0.912	0.996833	36.2	129.4	70.6	75.72	33.97	High	High	High	High	High	High	1		3	3	Present Both	1	GLYMA_12G027400	GLYMA_12G027400	sp|Q1PEP5|NUCL2_ARATH	Nucleolin 2 GN=NUCL2	ident:143/744 pos:190/744 query:744 hit:636 align:312 bit:252.3	Partial_match_both	Nucleolin 2	Protein NUCLEOLIN LIKE 2 (AtNUC-L2); Protein PARALLEL LIKE 1 (AtPARLL1)	NUCL2_ARATH	Q1PEP5	Q9LIH8	NUCL2	PARLL1	Arabidopsis thaliana (Mouse-ear cress)
High	Master Protein	GLYMA_13G145200		K11294 - nucleolin (NCL, NSR1) (1 of 11)	0	15.2	9	1	1	1	279	29.9	6.61	7.41	1	0	0.01	1.31e-16		200				High	Not Found	Not Found	Not Found	Not Found	Not Found	1		1	0	Missing Both	1	GLYMA_13G145200	GLYMA_13G145200	sp|Q9ZUU4|CP29B_ARATH	RNA-binding protein CP29B, chloroplastic GN=CP29B	ident:156/279 pos:180/279 query:279 hit:289 align:241 bit:272.7	OK	RNA-binding protein CP29B, chloroplastic	Ribonucleoprotein At2g37220	CP29B_ARATH	Q9ZUU4	Q7GA50; Q8L941	CP29B	na	Arabidopsis thaliana (Mouse-ear cress)
High	Master Protein	GLYMA_08G335300		K11338 - RuvB-like protein 2 [EC:3.6.4.12] (RUVBL2, RVB2, INO80J) (1 of 2)	0	18.663	11	4	8	4	465	51	5.47	20.39	4	0	0.873	0.996833	42.17	109.5	90.5	39.54	12.55	High	High	High	High	High	High	1		3	3	Present Both	1	GLYMA_08G335300	GLYMA_08G335300	sp|Q9FMR9|RIN1_ARATH	RuvB-like protein 1 GN=RIN1	ident:201/465 pos:301/465 query:465 hit:458 align:459 bit:373.6	Poor_match	RuvB-like protein 1	49 kDa TATA box-binding protein-interacting protein homolog (AtTIP49a); Ruv DNA-helicase-like protein	RIN1_ARATH	Q9FMR9	na	RIN1	RVB1; TIP49a	Arabidopsis thaliana (Mouse-ear cress)
High	Master Protein	GLYMA_11G011200		K11352 - NADH dehydrogenase (ubiquinone) 1 alpha subcomplex subunit 12 (NDUFA12) (1 of 2)	0	53.254	49	10	30	10	158	18.3	8.84	65.65	10	0	1.412	0.869996	44.82	61	139	54.01	10.29	High	High	High	High	High	High	1		3	3	Present Both	1	GLYMA_11G011200	GLYMA_11G011200	sp|Q9M9M9|NDUAC_ARATH	Probable NADH dehydrogenase [ubiquinone] 1 alpha subcomplex subunit 12 GN=CBP20	ident:122/158 pos:138/158 query:158 hit:159 align:150 bit:273.5	OK	Probable NADH dehydrogenase [ubiquinone] 1 alpha subcomplex subunit 12	na	NDUAC_ARATH	Q9M9M9	na	OrderedLocusNames=At3g03100	na	Arabidopsis thaliana (Mouse-ear cress)
High	Master Protein	GLYMA_10G128100		K11353 - NADH dehydrogenase (ubiquinone) 1 alpha subcomplex subunit 13 (NDUFA13) (1 of 1)	0	155.504	59	10	76	5	143	16.2	9.52	238.44	10	7	1.501	0.817125	54.58	53.1	146.9	40.33	20.95	High	High	High	High	High	High	1		3	3	Present Both	1	GLYMA_10G128100	GLYMA_10G128100	sp|O49313|NDADB_ARATH	NADH dehydrogenase [ubiquinone] 1 alpha subcomplex subunit 13-B GN=NDA2	ident:124/143 pos:135/143 query:143 hit:143 align:143 bit:261.9	OK	NADH dehydrogenase [ubiquinone] 1 alpha subcomplex subunit 13-B	na	NDADB_ARATH	O49313	na	OrderedLocusNames=At2g33220	na	Arabidopsis thaliana (Mouse-ear cress)
High	Master Protein	GLYMA_08G096800		K11517 - (S)-2-hydroxy-acid oxidase (HAO) (1 of 7)	0	86.729	38	11	29	9	370	40.6	9.09	69.04	11	2	1.356	0.932333	41.13	76.9	123.1	33.34	44.8	High	High	High	High	High	High	1		3	3	Present Both	1	GLYMA_08G096800	GLYMA_08G096800	sp|Q9LRR9|GLO1_ARATH	(S)-2-hydroxy-acid oxidase GLO1 GN=GLO1	ident:319/370 pos:348/370 query:370 hit:367 align:365 bit:654.4	OK	(S)-2-hydroxy-acid oxidase GLO1	Glycolate oxidase 1 (AtGLO1; GOX 1); Short chain alpha-hydroxy acid oxidase GLO1	GLO1_ARATH	Q9LRR9	B9DHI6; Q8VZA4; Q944K6	GLO1	na	Arabidopsis thaliana (Mouse-ear cress)
High	Master Protein	GLYMA_08G048100		K11518 - mitochondrial import receptor subunit TOM40 (TOM40) (1 of 2)	0	18.181	10	3	8	3	310	34.6	7.81	22.72	3	0	0.532	0.657116	17.92	139.9	60.1	19.65	60.16	High	High	High	High	Peak Found	High	1		3	3	Present Both	1	GLYMA_08G048100	GLYMA_08G048100	sp|Q9LHE5|TO401_ARATH	Mitochondrial import receptor subunit TOM40-1 GN=TOM40-1	ident:223/310 pos:258/310 query:310 hit:309 align:310 bit:473.4	OK	Mitochondrial import receptor subunit TOM40-1, N-terminally processed	Translocase of outer membrane 40 kDa subunit homolog 1	TO401_ARATH	Q9LHE5	na	TOM40-1	na	Arabidopsis thaliana (Mouse-ear cress)
High	Master Protein	GLYMA_12G180600		K11824 - AP-2 complex subunit alpha (AP2A) (1 of 2)	0	4.035	1	1	4	1	1020	113.7	6.25	9.75	1	0	0.536	0.67341	14.23	143.1	56.9	47.37	44.21	High	High	Peak Found	Peak Found	High	High	1		3	3	Present Both	1	GLYMA_12G180600	GLYMA_12G180600	sp|Q8LPK4|AP2A2_ARATH	AP-2 complex subunit alpha-2 GN=ALPHAC-AD	ident:830/1020 pos:909/1020 query:1020 hit:1013 align:1022 bit:1702.2	OK	AP-2 complex subunit alpha-2	Adaptor protein complex AP-2 subunit alpha-2; Adaptor-related protein complex 2 subunit alpha-2; Alpha-adaptin 2; Clathrin assembly protein complex 2 alpha-C large chain (At-aC-Ad; At-alphaC-Ad)	AP2A2_ARATH	Q8LPK4	Q9FGT0	ALPHAC-AD	na	Arabidopsis thaliana (Mouse-ear cress)
High	Master Protein	GLYMA_14G019100		K11996 - adenylyltransferase and sulfurtransferase (MOCS3, UBA4, moeB) (1 of 3)	0.003	2.196	2	1	3	1	457	49.4	7.46	3.63	1	0	0.526	0.638435	15.35	131	69	12.69	53.54	High	High	Not Found	Peak Found	Not Found	High	1		2	2	Present Both	1	GLYMA_14G019100	GLYMA_14G019100	sp|Q9ZNW0|MOCS3_ARATH	Adenylyltransferase and sulfurtransferase MOCS3 GN=MOCS3	ident:312/457 pos:382/457 query:457 hit:464 align:459 bit:646.0	OK	Molybdopterin-synthase sulfurtransferase	Molybdenum cofactor synthesis protein 3; Adenylyltransferase MOCS3; Sulfur carrier protein MOCS2A adenylyltransferase; Sulfur carrier protein MOCS2A sulfurtransferase; Sulfurtransferase 13 (AtStr13); Sulfurtransferase MOCS3	MOCS3_ARATH	Q9ZNW0	B9DGV4; Q058R2	MOCS3	na	Arabidopsis thaliana (Mouse-ear cress)
High	Master Protein	GLYMA_15G259200		K12158 - ubiquitin-like protein Nedd8 (NEDD8) (1 of 3)	0	319.912	70	18	204	18	154	17.2	6.06	700.71	18	0	0.668	0.932333	29.87	116.1	83.9	19.39	16	High	High	High	High	High	High	1		3	3	Present Both	1	GLYMA_15G259200	GLYMA_15G259200	sp|Q9M1P9|RUB1_ARATH	Ubiquitin-NEDD8-like protein RUB1 GN=RUB1	ident:151/154 pos:152/154 query:154 hit:156 align:152 bit:299.7	OK	NEDD8-like protein RUB1	Ubiquitin-related protein 1 (AtRUB1)	RUB1_ARATH	Q9SHE7	O80715; P59263; Q0WQU3; Q38875; Q9LDJ2; Q9LYW1; Q9M0W3; Q9M1P9; Q9S7X3	RUB1	NEDD8; UBQ15	Arabidopsis thaliana (Mouse-ear cress)
High	Master Protein	GLYMA_14G163800		K12162 - ubiquitin-fold modifier 1 (UFM1) (1 of 3)	0	15.54	66	3	10	3	94	10.2	9.19	21.7	3	0	0.74	0.970746	38.6	152.5	47.5	57.58	57.94	High	High	High	High	High	High	1		3	3	Present Both	1	GLYMA_14G163800	GLYMA_14G163800	sp|Q9CA23|UFM1_ARATH	Ubiquitin-fold modifier 1 GN=UGE3	ident:84/94 pos:86/94 query:94 hit:93 align:87 bit:171.8	OK	Ubiquitin-fold modifier 1	na	UFM1_ARATH	Q9CA23	na	OrderedLocusNames=At1g77710	na	Arabidopsis thaliana (Mouse-ear cress)
High	Master Protein	GLYMA_13G352200		K12197 - charged multivesicular body protein 1 (CHMP1, VPS46, DID2) (1 of 2)	0	9.907	10	2	6	2	203	22.6	7.2	15.97	2	0	1.58	0.75101	123.21	60.7	139.3	119.24	80.8	High	High	High	High	High	Peak Found	1		3	3	Present Both	1	GLYMA_13G352200	GLYMA_13G352200	sp|Q8LE58|CHM1A_ARATH	ESCRT-related protein CHMP1A GN=CHMP1A	ident:183/203 pos:195/203 query:203 hit:203 align:203 bit:380.6	OK	ESCRT-related protein CHMP1A	Protein CHARGED MULTIVESICULAR BODY PROTEIN 1A; Protein CHROMATIN MODIFYING PROTEIN 1A; Vacuolar protein-sorting-associated protein 46.1	CHM1A_ARATH	Q8LE58	Q9FZ60	CHMP1A	na	Arabidopsis thaliana (Mouse-ear cress)
High	Master Protein	GLYMA_08G039200		K12355 - coniferyl-aldehyde dehydrogenase (REF1) (1 of 9)	0	32.88	9	5	12	3	501	54.4	6.42	20.58	5	2	0.403	0.277188	6.79	149	51	37.22	11.38	High	High	High	Peak Found	Peak Found	Peak Found	1		3	3	Present Both	1	GLYMA_08G039200	GLYMA_08G039200	sp|Q56YU0|AL2C4_ARATH	Aldehyde dehydrogenase family 2 member C4 GN=ALDH2C4	ident:350/501 pos:415/501 query:501 hit:501 align:489 bit:743.4	OK	Aldehyde dehydrogenase family 2 member C4	ALDH1a; Protein REDUCED EPIDERMAL FLUORESCENCE 1	AL2C4_ARATH	Q56YU0	Q9LV57	ALDH2C4	REF1	Arabidopsis thaliana (Mouse-ear cress)
High	Master Protein	GLYMA_13G004600		K12394 - AP-1 complex subunit sigma 1/2 (AP1S1_2) (1 of 3)	0	19.545	24	2	5	1	161	18.7	7.36	15.69	2	1	0.852	0.996833	8.44	80.2	119.8	37.89	98.83	High	High	High	Peak Found	Peak Found	Peak Found	1		3	3	Present Both	1	GLYMA_13G004600	GLYMA_13G004600	sp|O23685|AP1S2_ARATH	AP-1 complex subunit sigma-2 GN=AAP19-2	ident:143/161 pos:155/161 query:161 hit:162 align:160 bit:301.2	OK	AP-1 complex subunit sigma-2	Adaptor AP-1 19 kDa protein; Adaptor protein complex AP-1 sigma-2 subunit; Adaptor-related protein complex 1 sigma-2 subunit; Clathrin assembly protein complex 1 sigma-2 small chain; Clathrin assembly small subunit protein AP19-2 (AtAP19-2); Sigma 2 subunit of AP-1 clathrin; Sigma-adaptin 2; Sigma2-adaptin	AP1S2_ARATH	O23685	na	AAP19-2	na	Arabidopsis thaliana (Mouse-ear cress)
High	Master Protein	GLYMA_20G063200		K12394 - AP-1 complex subunit sigma 1/2 (AP1S1_2) (1 of 3)	0	18.744	24	2	6	1	161	18.8	7.36	21.25	2	0	0.581	0.763527	5.31	127.2	72.8	15.13	7.53	High	Peak Found	High	Peak Found	High	High	1		3	3	Present Both	1	GLYMA_20G063200	GLYMA_20G063200	sp|O23685|AP1S2_ARATH	AP-1 complex subunit sigma-2 GN=AAP19-2	ident:143/161 pos:155/161 query:161 hit:162 align:160 bit:301.6	OK	AP-1 complex subunit sigma-2	Adaptor AP-1 19 kDa protein; Adaptor protein complex AP-1 sigma-2 subunit; Adaptor-related protein complex 1 sigma-2 subunit; Clathrin assembly protein complex 1 sigma-2 small chain; Clathrin assembly small subunit protein AP19-2 (AtAP19-2); Sigma 2 subunit of AP-1 clathrin; Sigma-adaptin 2; Sigma2-adaptin	AP1S2_ARATH	O23685	na	AAP19-2	na	Arabidopsis thaliana (Mouse-ear cress)
High	Master Protein	GLYMA_18G299500		K12471 - epsin (EPN) (1 of 6)	0	20.056	3	3	9	1	975	104.1	6.05	23.19	3	2	0.374	0.204371	2.33	124	76	39.65	15.8	High	High	Not Found	Not Found	Not Found	Not Found	1		2	0	Only Control	1	GLYMA_18G299500	GLYMA_18G299500	sp|Q93YP4|EPN3_ARATH	Clathrin interactor EPSIN 3 GN=EPSIN3	ident:506/975 pos:619/975 query:975 hit:1024 align:1092 bit:721.1	Poor_match	Clathrin interactor EPSIN 3	EPSIN-related 3	EPN3_ARATH	Q93YP4	Q9LX42	EPSIN3	EPSINR3	Arabidopsis thaliana (Mouse-ear cress)
High	Master Protein	GLYMA_05G151100		K12524 - bifunctional aspartokinase / homoserine dehydrogenase 1 (thrA) (1 of 2)	0	15.2	2	1	8	1	916	100.4	7.36	35.62	1	0	0.637	0.864911	17.6	113.9	86.1	27.32	29.07	High	High	High	High	High	High	1		3	3	Present Both	1	GLYMA_05G151100	GLYMA_05G151100	sp|O81852|AKH2_ARATH	Bifunctional aspartokinase/homoserine dehydrogenase 2, chloroplastic GN=AKHSDH2	ident:707/916 pos:801/916 query:916 hit:916 align:918 bit:1456.4	OK	Homoserine dehydrogenase	Beta-aspartyl phosphate homoserine 2	AKH2_ARATH	O81852	Q3E9Y8	AKHSDH2	AK-HSDH II	Arabidopsis thaliana (Mouse-ear cress)
High	Master Protein	GLYMA_08G337200		K12616 - enhancer of mRNA-decapping protein 4 (EDC4) (1 of 5)	0	47.154	10	11	24	11	1346	146.2	5.91	51.82	11	0	0.713	0.963781	23.17	94.8	105.2	70.29	30.8	High	High	High	High	High	High	1		3	3	Present Both	1	GLYMA_08G337200	GLYMA_08G337200	sp|Q9LTT8|VCS_ARATH	Enhancer of mRNA-decapping protein 4 GN=VCS	ident:755/1346 pos:944/1346 query:1346 hit:1344 align:1354 bit:1414.0	OK	Enhancer of mRNA-decapping protein 4	Protein VARICOSE	VCS_ARATH	Q9LTT8	F4JC94; Q0WLC5; Q56YT1; Q8L7N9	VCS	EDC4	Arabidopsis thaliana (Mouse-ear cress)
High	Master Protein	GLYMA_19G153500		K12621 - U6 snRNA-associated Sm-like protein LSm2 (LSM2) (1 of 2)	0	23.814	44	4	10	4	93	10.7	7.44	24.98	4	0	0.571	0.75101	22.21	147.2	52.8	44.94	22.14	High	High	High	High	High	High	1		3	3	Present Both	1	GLYMA_19G153500	GLYMA_19G153500	sp|Q1H595|LSM2_ARATH	Sm-like protein LSM2 GN=LSM2	ident:82/93 pos:89/93 query:93 hit:93 align:93 bit:175.3	OK	Sm-like protein LSM2 (AtLSM2)	U6 snRNA-associated Sm-like protein LSM2	LSM2_ARATH	Q1H595	Q8L5U6; Q9ZVT4	LSM2	na	Arabidopsis thaliana (Mouse-ear cress)
High	Master Protein	GLYMA_18G229600		K12625 - U6 snRNA-associated Sm-like protein LSm6 (LSM6) (1 of 2)	0	33.411	47	6	22	6	91	9.8	9.07	53.01	6	0	0.584	0.772472	16.58	131.4	68.6	46.93	25.19	High	High	High	High	High	High	1		3	3	Present Both	1	GLYMA_18G229600	GLYMA_18G229600	sp|Q9M1Z3|LSM6A_ARATH	Sm-like protein LSM6A GN=LSM6A	ident:80/91 pos:83/91 query:91 hit:91 align:91 bit:165.6	OK	Sm-like protein LSM6A (AtLSM6A)	U6 snRNA-associated Sm-like protein LSM6A	LSM6A_ARATH	Q9M1Z3	A0A1I9LSF1; Q8LCS5	LSM6A	na	Arabidopsis thaliana (Mouse-ear cress)
High	Master Protein	GLYMA_08G172900		K12627 - U6 snRNA-associated Sm-like protein LSm8 (LSM8) (1 of 2)	0	58.994	62	5	13	5	98	10.6	4.84	47.31	5	0	0.382	0.223484	8.51	178.4	21.6	74.14	23.62	High	High	Peak Found	High	High	High	1		3	3	Present Both	1	GLYMA_08G172900	GLYMA_08G172900	sp|Q8VYI0|LSM8_ARATH	Sm-like protein LSM8 GN=LSM8	ident:86/98 pos:92/98 query:98 hit:98 align:98 bit:176.4	OK	Sm-like protein LSM8 (AtLSM8)	U6 snRNA-associated Sm-like protein LSM8	LSM8_ARATH	Q8VYI0	Q9SHY4	LSM8	na	Arabidopsis thaliana (Mouse-ear cress)
High	Master Protein	GLYMA_12G045400		K12670 - oligosaccharyltransferase complex subunit beta (WBP1) (1 of 1)	0	10.993	8	3	5	3	433	48.2	6.48	8.42	3	0	0.453	0.424344	15.38	114.6	85.4	15.63	41.27	High	High	High	Peak Found	Peak Found	High	1		3	3	Present Both	1	GLYMA_12G045400	GLYMA_12G045400	sp|Q944K2|OST48_ARATH	Dolichyl-diphosphooligosaccharide--protein glycosyltransferase 48 kDa subunit GN=OST48	ident:322/433 pos:383/433 query:433 hit:437 align:430 bit:674.9	OK	Dolichyl-diphosphooligosaccharide--protein glycosyltransferase 48 kDa subunit (Oligosaccharyl transferase 48 kDa subunit)	Protein DEFECTIVE GLYCOSYLATION 1	OST48_ARATH	Q944K2	Q8LDT6; Q94CD6; Q9LVR2	OST48	DGL1	Arabidopsis thaliana (Mouse-ear cress)
High	Master Protein	GLYMA_17G078400		K12741 - heterogeneous nuclear ribonucleoprotein A1/A3 (HNRNPA1_3) (1 of 20)	0	13.9	17	2	4	2	275	28.1	5.31	11.83	2	0	0.557	0.722803	0	129	71	75.82		High	High	Not Found	Not Found	High	High	1		2	2	Present Both	1	GLYMA_17G078400	GLYMA_17G078400	sp|Q9FNR1|RBG3_ARATH	Glycine-rich RNA-binding protein 3, mitochondrial GN=RBG3	ident:83/275 pos:105/275 query:275 hit:309 align:122 bit:181.0	Partial_match_both	Glycine-rich RNA-binding protein 3, mitochondrial (AtGR-RBP3)	AtRBG3; Mitochondrial RNA-binding protein 2a (At-mRBP2a); Organelle RRM domain-containing protein 3	RBG3_ARATH	Q9FNR1	na	RBG3	na	Arabidopsis thaliana (Mouse-ear cress)
High	Master Protein	GLYMA_13G167800		K12845 - U4/U6 small nuclear ribonucleoprotein SNU13 (SNU13, NHP2L) (1 of 4)	0	92.985	50	6	31	1	153	16.6	7.87	140.24	6	0	0.257	0.0245843	4.74	162.3	37.7	69.72	47.33	High	High	High	Not Found	High	High	1		3	2	Present Both	1	GLYMA_13G167800	GLYMA_13G167800	sp|Q9LEY9|NHP2_ARATH	H/ACA ribonucleoprotein complex subunit 2-like protein GN=NHL6	ident:49/153 pos:74/153 query:153 hit:156 align:133 bit:89.0	Poor_match	H/ACA ribonucleoprotein complex subunit 2-like protein	Nhp2-like protein	NHP2_ARATH	Q9LEY9	na	OrderedLocusNames=At5g08180	na	Arabidopsis thaliana (Mouse-ear cress)
High	Master Protein	GLYMA_14G196700		K12845 - U4/U6 small nuclear ribonucleoprotein SNU13 (SNU13, NHP2L) (1 of 4)	0	109.255	63	7	31	2	128	13.8	7.12	135.1	7	6	0.556	0.722803	20.51	149.1	50.9	61.76	10.93	High	High	High	High	High	High	1		3	3	Present Both	1	GLYMA_14G196700	GLYMA_14G196700	sp|Q9LEY9|NHP2_ARATH	H/ACA ribonucleoprotein complex subunit 2-like protein GN=NHL6	ident:48/128 pos:73/128 query:128 hit:156 align:131 bit:88.6	Poor_match	H/ACA ribonucleoprotein complex subunit 2-like protein	Nhp2-like protein	NHP2_ARATH	Q9LEY9	na	OrderedLocusNames=At5g08180	na	Arabidopsis thaliana (Mouse-ear cress)
High	Master Protein	GLYMA_11G141500		K12881 - THO complex subunit 4 (THOC4, ALY) (1 of 5)	0	50.394	43	7	17	7	247	26.2	10.1	52.74	7	0	1.46	0.846919	31.39	63.2	136.8	27.63	7.8	High	High	High	High	High	High	1		3	3	Present Both	1	GLYMA_11G141500	GLYMA_11G141500	sp|Q8L773|THO4A_ARATH	THO complex subunit 4A GN=ALY1	ident:146/247 pos:179/247 query:247 hit:244 align:250 bit:232.6	OK	THO complex subunit 4A	ALYREF homolog 1 (AtALY1)	THO4A_ARATH	Q8L773	Q8LCA6; Q9FJE1	ALY1	THO4A	Arabidopsis thaliana (Mouse-ear cress)
High	Master Protein	GLYMA_14G136700		K12896 - splicing factor, arginine/serine-rich 7 (SFRS7) (1 of 8)	0	29.156	20	4	19	4	178	20.4	11.36	40.51	4	0	0.67	0.932333	30.83	142.9	57.1	43.98	63.63	High	High	High	High	High	High	1		3	3	Present Both	1	GLYMA_14G136700	GLYMA_14G136700	sp|O81126|RSZ22_ARATH	Serine/arginine-rich splicing factor RSZ22 GN=RSZ22	ident:137/178 pos:146/178 query:178 hit:200 align:200 bit:210.3	OK	Serine/arginine-rich splicing factor RSZ22	RS-containing zinc finger protein 22 (At-RSZ22; At-RSZp22; AtRSZ22)	RSZ22_ARATH	O81126	O23646	RSZ22	RSZP22; SRZ22	Arabidopsis thaliana (Mouse-ear cress)
High	Master Protein	GLYMA_02G254500		K12947 - signal peptidase complex subunit 2 (SPCS2, SPC2) (1 of 2)	0	11.124	23	4	6	4	184	20.7	9.32	9.76	4	0	1.12	0.996833	46.1	115.3	84.7	27.67	36.28	High	High	Peak Found	Peak Found	High	High	1		3	3	Present Both	1	GLYMA_02G254500	GLYMA_02G254500	sp|P58684|SPCS2_ARATH	Probable signal peptidase complex subunit 2 GN=SPCH	ident:148/184 pos:161/184 query:184 hit:192 align:183 bit:305.1	OK	Probable signal peptidase complex subunit 2	Microsomal signal peptidase 25 kDa subunit (SPase 25 kDa subunit)	SPCS2_ARATH	P58684	na	OrderedLocusNames=At2g39960	na	Arabidopsis thaliana (Mouse-ear cress)
High	Master Protein	GLYMA_15G158800		K13025 - ATP-dependent RNA helicase (EIF4A3, FAL1) (1 of 2)	0	69.399	14	4	19	4	406	45.9	6.24	56.11	4	0	0.903	0.996833	38.58	99.1	100.9	64.13	38.8	High	High	High	High	High	High	1		3	3	Present Both	1	GLYMA_15G158800	GLYMA_15G158800	sp|Q94A52|RH2_ARATH	Eukaryotic initiation factor 4A-III homolog GN=EIF4A3	ident:343/406 pos:374/406 query:406 hit:408 align:388 bit:729.2	OK	Eukaryotic initiation factor 4A-III homolog (AteIF4AIII; eIF-4A-III; eIF4A-III)	DEAD-box ATP-dependent RNA helicase 2 (AtRH02)	RH2_ARATH	Q94A52	Q9ZS14	EIF4A3	na	Arabidopsis thaliana (Mouse-ear cress)
High	Master Protein	GLYMA_09G258000		K13034 - L-3-cyanoalanine synthase/ cysteine synthase (ATCYSC1) (1 of 2)	0	14.562	7	2	5	2	373	40.1	7.56	11.65	2	0	0.652	0.892203	29.01	97.7	102.3	74.3	40.98	High	High	High	Peak Found	Peak Found	High	1		3	3	Present Both	1	GLYMA_09G258000	GLYMA_09G258000	sp|Q9S757|CYSC1_ARATH	Bifunctional L-3-cyanoalanine synthase/cysteine synthase C1, mitochondrial GN=CYSC1	ident:292/373 pos:329/373 query:373 hit:368 align:373 bit:589.3	OK	Bifunctional L-3-cyanoalanine synthase/cysteine synthase C1, mitochondrial	Beta-substituted Ala synthase 3;1 (ARAth-Bsas3;1); Cysteine synthase C1 (AtCYSC1); O-acetylserine (thiol)-lyase 5	CYSC1_ARATH	Q9S757	F4JEA0; F4JEA1	CYSC1	OAS5	Arabidopsis thaliana (Mouse-ear cress)
High	Master Protein	GLYMA_17G240400		K13126 - polyadenylate-binding protein (PABPC) (1 of 14)	0	79.345	23	9	23	3	654	71.9	7.15	73.48	9	4	0.75	0.977957	29.31	83.4	116.6	63.29	32.48	High	High	High	High	High	High	1		3	3	Present Both	1	GLYMA_17G240400	GLYMA_17G240400	sp|P42731|PABP2_ARATH	Polyadenylate-binding protein 2 GN=PAB2	ident:442/654 pos:525/654 query:654 hit:629 align:656 bit:863.6	OK	Polyadenylate-binding protein 2 (PABP-2; Poly(A)-binding protein 2)	na	PABP2_ARATH	P42731	Q8RXR5	PAB2	na	Arabidopsis thaliana (Mouse-ear cress)
High	Master Protein	GLYMA_03G110300		K13199 - plasminogen activator inhibitor 1 RNA-binding protein (SERBP1) (1 of 5)	0	124.747	25	6	38	2	368	39.1	6.02	154.85	6	4	0.648	0.886399	41.69	146.6	53.4	48.1	27.93	High	High	High	High	High	High	1		3	3	Present Both	1	GLYMA_03G110300	GLYMA_03G110300	sp|O23593|RGGB_ARATH	RGG repeats nuclear RNA binding protein B GN=RGGB	ident:189/368 pos:232/368 query:368 hit:360 align:389 bit:271.9	Poor_match	RGG repeats nuclear RNA binding protein B	na	RGGB_ARATH	O23593	Q8LB56	RGGB	na	Arabidopsis thaliana (Mouse-ear cress)
High	Master Protein	GLYMA_07G114600		K13199 - plasminogen activator inhibitor 1 RNA-binding protein (SERBP1) (1 of 5)	0	106.79	25	6	36	2	368	39.3	6.19	167.65	6	0	0.841	0.996833	33.8	106.3	93.7	17.25	37.95	High	High	High	High	High	High	1		3	3	Present Both	1	GLYMA_07G114600	GLYMA_07G114600	sp|O23593|RGGB_ARATH	RGG repeats nuclear RNA binding protein B GN=RGGB	ident:186/368 pos:228/368 query:368 hit:360 align:391 bit:269.6	Poor_match	RGG repeats nuclear RNA binding protein B	na	RGGB_ARATH	O23593	Q8LB56	RGGB	na	Arabidopsis thaliana (Mouse-ear cress)
High	Master Protein	GLYMA_09G243200		K13199 - plasminogen activator inhibitor 1 RNA-binding protein (SERBP1) (1 of 5)	0	69.816	32	7	23	3	367	39.4	6.19	83.25	7	0	0.656	0.903477	53.42	117.3	82.7	74.08	13.78	High	High	Peak Found	High	High	High	1		3	3	Present Both	1	GLYMA_09G243200	GLYMA_09G243200	sp|O23593|RGGB_ARATH	RGG repeats nuclear RNA binding protein B GN=RGGB	ident:192/367 pos:241/367 query:367 hit:360 align:385 bit:272.3	OK	RGG repeats nuclear RNA binding protein B	na	RGGB_ARATH	O23593	Q8LB56	RGGB	na	Arabidopsis thaliana (Mouse-ear cress)
High	Master Protein	GLYMA_18G251400		K13199 - plasminogen activator inhibitor 1 RNA-binding protein (SERBP1) (1 of 5)	0	103.508	39	10	37	6	370	39.9	6.3	112.33	10	4	0.863	0.996833	36.41	117.2	82.8	35.64	20.83	High	High	High	High	High	High	1		3	3	Present Both	1	GLYMA_18G251400	GLYMA_18G251400	sp|O23593|RGGB_ARATH	RGG repeats nuclear RNA binding protein B GN=RGGB	ident:191/370 pos:235/370 query:370 hit:360 align:385 bit:280.0	Poor_match	RGG repeats nuclear RNA binding protein B	na	RGGB_ARATH	O23593	Q8LB56	RGGB	na	Arabidopsis thaliana (Mouse-ear cress)
High	Master Protein	GLYMA_16G050800		K13250 - translocon-associated protein subunit beta (SSR2) (1 of 2)	0	43.702	27	4	28	1	194	20.9	9.36	96.88	4	3	0.959	0.998649	26.64	104.8	95.2	10.85	17.22	High	High	High	High	High	High	1		3	3	Present Both	1	GLYMA_16G050800	GLYMA_16G050800	sp|P46573|PBL10_ARATH	Probable serine/threonine-protein kinase PBL10 GN=PBL10	ident:19/194 pos:26/194 query:194 hit:412 align:48 bit:28.5	Partial_match_both	Probable serine/threonine-protein kinase PBL10	PBS1-like protein 10; Protein kinase 1B	PBL10_ARATH	P46573	Q7GAG3; Q9SLH5	PBL10	na	Arabidopsis thaliana (Mouse-ear cress)
High	Master Protein	GLYMA_07G202300		K13257 - 2-hydroxyisoflavanone synthase (CYP93C) (1 of 2)	0	34.675	15	7	18	7	521	58.9	9.01	44.92	7	0	0.704	0.952956	34.88	120.3	79.7	51.91	58.59	High	High	High	High	High	High	1		3	3	Present Both	1	GLYMA_07G202300	GLYMA_07G202300	sp|Q9LJY7|C75AK_ARATH	Cytochrome P450 705A20 GN=CYP705A20	ident:180/521 pos:271/521 query:521 hit:510 align:492 bit:308.1	Poor_match	Cytochrome P450 705A20	na	C75AK_ARATH	Q9LJY7	na	CYP705A20	na	Arabidopsis thaliana (Mouse-ear cress)
High	Master Protein	GLYMA_09G269600		K13265 - vestitone reductase (VR) (1 of 2)	0	7.524	4	1	6	1	327	35.9	5.74	15.42	1	0	0.598	0.803154	5.02	125.2	74.8		64.77	High	High	Not Found	High	High	High	1		2	3	Present Both	1	GLYMA_09G269600	GLYMA_09G269600	sp|O22133|BEN1_ARATH	Protein BRI1-5 ENHANCED 1 GN=BEN1	ident:174/327 pos:225/327 query:327 hit:364 align:328 bit:337.8	OK	Protein BRI1-5 ENHANCED 1	na	BEN1_ARATH	O22133	na	BEN1	na	Arabidopsis thaliana (Mouse-ear cress)
High	Master Protein	GLYMA_13G115800		K13462 - guanine nucleotide-exchange factor (MIN7) (1 of 2)	0	12.307	2	2	5	2	1782	197.6	5.69	13.51	2	0	0.675	0.941361	7.32	161.6	38.4	1.23	14.6	High	High	Not Found	Peak Found	High	High	1		2	3	Present Both	1	GLYMA_13G115800	GLYMA_13G115800	sp|F4IXW2|BIG5_ARATH	Brefeldin A-inhibited guanine nucleotide-exchange protein 5 GN=BIG5	ident:1335/1782 pos:1482/1782 query:1782 hit:1739 align:1788 bit:2669.4	OK	Brefeldin A-inhibited guanine nucleotide-exchange protein 5 (BIG5)	ARF guanine-nucleotide exchange factor BIG5; Protein BFA-VISUALIZED ENDOCYTIC TRAFFICKING DEFECTIVE 1 (Protein BEN1); Protein HOPM INTERACTOR 7	BIG5_ARATH	F4IXW2	F4IXW1; Q0WM86; Q9LXK4	BIG5	ATMIN7; BEN1	Arabidopsis thaliana (Mouse-ear cress)
High	Master Protein	GLYMA_07G218700		K14003 - prolactin regulatory element-binding protein (PREB, SEC12) (1 of 3)	0	19.302	7	2	4	2	400	43.3	5.8	12.44	2	0	0.01	1.31e-16		200		35.37		High	High	Not Found	Not Found	Not Found	High	1		2	1	Only Control	1	GLYMA_07G218700	GLYMA_07G218700	sp|Q39221|STLP2_ARATH	SEC12-like protein 2 GN=STL2P	ident:182/400 pos:246/400 query:400 hit:393 align:363 bit:322.8	Poor_match	SEC12-like protein 2	na	STLP2_ARATH	Q39221	Q7EP29; Q8VZ72	STL2P	ST12P	Arabidopsis thaliana (Mouse-ear cress)
High	Master Protein	GLYMA_12G097500		K14009 - B-cell receptor-associated protein 31 (BCAP31, BAP31) (1 of 9)	0	3.399	4	1	5	1	221	25	9.03	3.71	1	0	1.392	0.891522	38.29	83.6	116.4	37.42	14.86	High	High	High	High	High	Peak Found	1		3	3	Present Both	1	GLYMA_12G097500	GLYMA_12G097500	sp|Q501B2|BZP16_ARATH	bZIP transcription factor 16 GN=BZIP16	ident:24/221 pos:34/221 query:221 hit:409 align:71 bit:33.1	Partial_match_both	bZIP transcription factor 16 (AtbZIP16)	na	BZP16_ARATH	Q501B2	O82288	BZIP16	na	Arabidopsis thaliana (Mouse-ear cress)
Medium	Master Protein	GLYMA_09G007600		K14012 - UBX domain-containing protein 1 (SHP1, UBX1, NSFL1C) (1 of 4)	0.019	1.368	4	1	1	1	301	32.8	5.92	0	1	0	0.695	0.945815	19.3	118	82	29.3	31.67	High	Peak Found	Peak Found	Peak Found	Peak Found	Peak Found	1		3	3	Present Both	1	GLYMA_09G007600	GLYMA_09G007600	sp|Q8RWU7|PUX4_ARATH	Plant UBX domain-containing protein 4 GN=PUX4	ident:217/301 pos:247/301 query:301 hit:303 align:310 bit:391.7	OK	Plant UBX domain-containing protein 4 (PUX4)	CDC48-interacting UBX-domain protein 4	PUX4_ARATH	Q8RWU7	O81456	PUX4	na	Arabidopsis thaliana (Mouse-ear cress)
High	Master Protein	GLYMA_13G363900		K14309 - nuclear pore complex protein Nup93 (NUP93, NIC96) (1 of 2)	0	19.739	6	4	15	4	861	95.8	6.81	32.44	4	0	0.956	0.999168	24.64	101.8	98.2	6.6	31.97	High	High	High	High	High	High	1		3	3	Present Both	1	GLYMA_13G363900	GLYMA_13G363900	sp|O22224|NP93A_ARATH	Nuclear pore complex protein NUP93A GN=NUP93A	ident:649/861 pos:747/861 query:861 hit:861 align:861 bit:1347.4	OK	Nuclear pore complex protein NUP93A	Nucleoporin 93A	NP93A_ARATH	O22224	Q94CF2	NUP93A	na	Arabidopsis thaliana (Mouse-ear cress)
High	Master Protein	GLYMA_03G019600		K14324 - histone deacetylase complex subunit SAP18 (SAP18) (1 of 1)	0	31.902	34	6	19	6	151	16.8	9.42	39.68	6	0	1.034	0.996833	96.4	92.9	107.1	9.99	29.3	High	High	High	High	High	High	1		3	3	Present Both	1	GLYMA_03G019600	GLYMA_03G019600	sp|O64644|SAP18_ARATH	Histone deacetylase complex subunit SAP18 GN=SAP12	ident:103/151 pos:121/151 query:151 hit:152 align:151 bit:195.7	OK	Histone deacetylase complex subunit SAP18	18 kDa Sin3-associated polypeptide	SAP18_ARATH	O64644	Q0WTU2; Q8L8K8	OrderedLocusNames=At2g45640	na	Arabidopsis thaliana (Mouse-ear cress)
High	Master Protein	GLYMA_11G237200		K14563 - rRNA 2'-O-methyltransferase fibrillarin (NOP1, FBL) (1 of 4)	0	37.283	30	5	12	5	315	33.2	10.04	44.87	5	0	0.32	0.0945321	2.66	166	34	1.88	53.89	High	High	Peak Found	High	High	High	1		3	3	Present Both	1	GLYMA_11G237200	GLYMA_11G237200	sp|Q94AH9|MD36A_ARATH	Mediator of RNA polymerase II transcription subunit 36a GN=MED36A	ident:222/315 pos:234/315 query:315 hit:320 align:244 bit:468.0	OK	Mediator of RNA polymerase II transcription subunit 36a	Fibrillarin-like protein 2; Histone-glutamine methyltransferase; rRNA 2'-O-methyltransferase fibrillarin 2	MD36A_ARATH	Q94AH9	Q9SZZ1	MED36A	FIB2; FLP; MED36_1	Arabidopsis thaliana (Mouse-ear cress)
High	Master Protein	GLYMA_12G040200		K14565 - nucleolar protein 58 (NOP58) (1 of 2)	0	17.001	3	1	5	1	556	61.4	9.03	19.75	1	0	0.155	0.000360205	0.69	178.7	21.3	7.15	32.38	High	High	Not Found	Peak Found	High	High	1		2	3	Present Both	1	GLYMA_12G040200	GLYMA_12G040200	sp|Q9MAB3|NOP5B_ARATH	Probable nucleolar protein 5-2 GN=NOP5-2	ident:366/556 pos:413/556 query:556 hit:533 align:445 bit:769.2	OK	Probable nucleolar protein 5-2	MAR-binding NOP56/58 homolog 2; Nucleolar protein 58-2	NOP5B_ARATH	Q9MAB3	na	NOP5-2	NOP58-2	Arabidopsis thaliana (Mouse-ear cress)
High	Master Protein	GLYMA_20G000500		K14677 - aminoacylase (ACY1) (1 of 2)	0	21.236	12	5	18	5	449	50	6.9	34.99	5	0	1.303	0.945815	72.84	79.3	120.7	62.98	29.24	High	High	High	High	High	High	1		3	3	Present Both	1	GLYMA_20G000500	GLYMA_20G000500	sp|Q8VXY9|UAH_ARATH	Ureidoglycolate hydrolase GN=UAH	ident:26/449 pos:38/449 query:449 hit:476 align:85 bit:38.5	Partial_match_both	Ureidoglycolate hydrolase (AtUAH)	Allantoate amidohydrolase 2 (AtAHH2); Ureidoglycolate amidohydrolase	UAH_ARATH	Q8VXY9	Q9FIY0	UAH	AAH2	Arabidopsis thaliana (Mouse-ear cress)
High	Master Protein	GLYMA_05G243800		K14753 - guanine nucleotide-binding protein subunit beta-2-like 1 protein (RACK1) (1 of 3)	0	135.145	24	8	45	8	325	35.6	7.72	215.3	8	0	0.568	0.746622	24.58	174.8	25.2	62.27	75.49	High	High	High	High	High	High	1		3	3	Present Both	1	GLYMA_05G243800	GLYMA_05G243800	sp|Q9LV28|GPLPC_ARATH	Receptor for activated C kinase 1C GN=RACK1C	ident:282/325 pos:305/325 query:325 hit:326 align:326 bit:587.8	OK	Receptor for activated C kinase 1C	Guanine nucleotide-binding protein subunit beta-like protein C	GPLPC_ARATH	Q9LV28	na	RACK1C	na	Arabidopsis thaliana (Mouse-ear cress)
High	Master Protein	GLYMA_10G198300		K14944 - RNA-binding protein Nova (NOVA) (1 of 2)	0	25.273	17	5	14	5	337	36.3	6.71	31.91	5	0	0.785	0.996833	32.72	114.1	85.9	39.71	12.46	High	High	High	High	High	High	1		3	3	Present Both	1	GLYMA_10G198300	GLYMA_10G198300	sp|Q9LZ82|BTR1_ARATH	Protein BTR1 GN=BTR1	ident:220/337 pos:266/337 query:337 hit:313 align:333 bit:437.2	OK	Protein BTR1	Binding to ToMV RNA 1	BTR1_ARATH	Q9LZ82	B9DH67; F4JW99	BTR1	na	Arabidopsis thaliana (Mouse-ear cress)
High	Master Protein	GLYMA_13G114300		K15028 - translation initiation factor 3 subunit K (EIF3K) (1 of 2)	0	12.852	6	1	9	1	229	26.2	5.64	19.75	1	0	0.532	0.657116	19.1	130.6	69.4	19.04	65.41	High	High	High	High	High	High	1		3	3	Present Both	1	GLYMA_13G114300	GLYMA_13G114300	sp|Q9SZA3|EIF3K_ARATH	Eukaryotic translation initiation factor 3 subunit K GN=TIF3K1	ident:170/229 pos:200/229 query:229 hit:226 align:231 bit:356.3	OK	Eukaryotic translation initiation factor 3 subunit K (eIF3k)	eIF-3 p25	EIF3K_ARATH	Q9SZA3	na	TIF3K1	na	Arabidopsis thaliana (Mouse-ear cress)
High	Master Protein	GLYMA_13G055200		K15030 - translation initiation factor 3 subunit M (EIF3M) (1 of 3)	0	23.754	7	2	9	1	410	46.3	5.01	50.54	2	0	0.34	0.130943	0.79	149.3	50.7		17.31	High	High	High	High	High	High	1		3	3	Present Both	1	GLYMA_13G055200	GLYMA_13G055200	sp|Q8RWF0|PS13A_ARATH	26S proteasome non-ATPase regulatory subunit 13 homolog A GN=RPN9A	ident:35/410 pos:76/410 query:410 hit:386 align:141 bit:48.9	Partial_match_both	26S proteasome non-ATPase regulatory subunit 13 homolog A	26S proteasome regulatory subunit RPN9a (AtRNP9a); 26S proteasome regulatory subunit S11 homolog A	PS13A_ARATH	Q8RWF0	Q9FK79	RPN9A	na	Arabidopsis thaliana (Mouse-ear cress)
High	Master Protein	GLYMA_19G101100		K15102 - solute carrier family 25 (mitochondrial phosphate transporter), member 3 (SLC25A3, PHC, PIC) (1 of 7)	0	76.15	24	8	41	3	375	39.8	9.26	120.09	8	5	0.771	0.996833	32.55	93.6	106.4	23.23	9.29	High	High	High	High	High	High	1		3	3	Present Both	1	GLYMA_19G101100	GLYMA_19G101100	sp|Q9FMU6|MPCP3_ARATH	Mitochondrial phosphate carrier protein 3, mitochondrial GN=MPT3	ident:295/375 pos:323/375 query:375 hit:375 align:376 bit:578.2	OK	Mitochondrial phosphate carrier protein 3, mitochondrial	Mitochondrial phosphate transporter 3 (MPT3); Phosphate transporter 3;1	MPCP3_ARATH	Q9FMU6	O80415; Q56WI0	MPT3	AT5; PHT3	Arabidopsis thaliana (Mouse-ear cress)
High	Master Protein	GLYMA_07G007000		K15718 - linoleate 9S-lipoxygenase (LOX1_5) (1 of 21)	0	848.623	65	64	448	54	864	96.8	6.15	1477.82	64	11	0.698	0.946051	35.33	138.2	61.8	40.15	35.43	High	High	High	High	High	High	1		3	3	Present Both	1	GLYMA_07G007000	GLYMA_07G007000	sp|Q06327|LOX1_ARATH	Linoleate 9S-lipoxygenase 1 GN=LOX1	ident:484/864 pos:623/864 query:864 hit:859 align:869 bit:983.4	OK	Linoleate 9S-lipoxygenase 1	Lipoxygenase 1 (AtLOX1)	LOX1_ARATH	Q06327	Q9FZ30	LOX1	na	Arabidopsis thaliana (Mouse-ear cress)
High	Master Protein	GLYMA_08G189600		K15718 - linoleate 9S-lipoxygenase (LOX1_5) (1 of 21)	0	16.668	6	4	11	4	866	97.1	6.44	20.79	4	0	0.339	0.129426	4.48	132.2	67.8	44.26	6.59	High	High	High	High	High	High	1		3	3	Present Both	1	GLYMA_08G189600	GLYMA_08G189600	sp|Q06327|LOX1_ARATH	Linoleate 9S-lipoxygenase 1 GN=LOX1	ident:503/866 pos:644/866 query:866 hit:859 align:868 bit:1023.9	OK	Linoleate 9S-lipoxygenase 1	Lipoxygenase 1 (AtLOX1)	LOX1_ARATH	Q06327	Q9FZ30	LOX1	na	Arabidopsis thaliana (Mouse-ear cress)
High	Master Protein	GLYMA_13G347700		K15718 - linoleate 9S-lipoxygenase (LOX1_5) (1 of 21)	0	782.332	58	61	392	15	853	96.4	6.1	1395.11	61	47	0.518	0.614351	19.75	146	54	37.12	27.53	High	High	High	High	High	High	1		3	3	Present Both	1	GLYMA_13G347700	GLYMA_13G347700	sp|Q06327|LOX1_ARATH	Linoleate 9S-lipoxygenase 1 GN=LOX1	ident:501/853 pos:650/853 query:853 hit:859 align:861 bit:1016.5	OK	Linoleate 9S-lipoxygenase 1	Lipoxygenase 1 (AtLOX1)	LOX1_ARATH	Q06327	Q9FZ30	LOX1	na	Arabidopsis thaliana (Mouse-ear cress)
High	Master Protein	GLYMA_15G026400		K15718 - linoleate 9S-lipoxygenase (LOX1_5) (1 of 21)	0	475.132	46	41	273	6	856	96.3	6.81	896.98	41	6	0.877	0.996833	43.41	109.9	90.1	9.19	6.11	High	High	High	High	High	High	1		3	3	Present Both	1	GLYMA_15G026400	GLYMA_15G026400	sp|Q06327|LOX1_ARATH	Linoleate 9S-lipoxygenase 1 GN=LOX1	ident:494/856 pos:651/856 query:856 hit:859 align:879 bit:1000.4	OK	Linoleate 9S-lipoxygenase 1	Lipoxygenase 1 (AtLOX1)	LOX1_ARATH	Q06327	Q9FZ30	LOX1	na	Arabidopsis thaliana (Mouse-ear cress)
High	Master Protein	GLYMA_06G162500		K15979 - staphylococcal nuclease domain-containing protein 1 (SND1) (1 of 4)	0	48.731	13	9	24	2	990	108.7	6.43	60.88	9	7	0.849	0.996833	39.49	124.8	75.2	44.68	143.55	High	Peak Found	Peak Found	Peak Found	High	Peak Found	1		3	3	Present Both	1	GLYMA_06G162500	GLYMA_06G162500	sp|Q8VZG7|TSN1_ARATH	Ribonuclease TUDOR 1 GN=TSN1	ident:721/990 pos:839/990 query:990 hit:991 align:995 bit:1462.2	OK	Ribonuclease TUDOR 1 (AtTudor1; TUDOR-SN protein 1)	na	TSN1_ARATH	Q8VZG7	F4K6N0; Q9LY25	TSN1	na	Arabidopsis thaliana (Mouse-ear cress)
High	Master Protein	GLYMA_13G256100		K17065 - dynamin 1-like protein (DNM1L) (1 of 5)	0	32.995	9	6	18	5	826	90.9	6.99	47.54	6	1	0.729	0.970114	22.61	108.4	91.6	29.09	19.58	High	High	High	High	High	High	1		3	3	Present Both	1	GLYMA_13G256100	GLYMA_13G256100	sp|Q8S944|DRP3A_ARATH	Dynamin-related protein 3A GN=DRP3A	ident:562/826 pos:647/826 query:826 hit:808 align:739 bit:1164.8	OK	Dynamin-related protein 3A	Dynamin-like protein 2; Dynamin-like protein 2a	DRP3A_ARATH	Q8S944	O22403; O81882; Q94CF3	DRP3A	ADL2; ADL2A	Arabidopsis thaliana (Mouse-ear cress)
High	Master Protein	GLYMA_04G131800		K17080 - prohibitin 1 (PHB1) (1 of 3)	0	521.612	96	28	236	5	279	30.4	8.35	1038.55	28	0	0.863	0.996833	26.33	106.2	93.8	28.15	30.37	High	High	High	High	High	High	1		3	3	Present Both	1	GLYMA_04G131800	GLYMA_04G131800	sp|O04331|PHB3_ARATH	Prohibitin-3, mitochondrial GN=PHB3	ident:226/279 pos:257/279 query:279 hit:277 align:275 bit:474.9	OK	Prohibitin-3, mitochondrial (Atphb3)	Protein ENHANCED ETHYLENE RESPONSE 3	PHB3_ARATH	O04331	na	PHB3	EER3	Arabidopsis thaliana (Mouse-ear cress)
High	Master Protein	GLYMA_06G317500		K17080 - prohibitin 1 (PHB1) (1 of 3)	0	523.433	92	28	242	5	279	30.3	8.37	1074.17	28	29	0.755	0.982847	39	106.5	93.5	24.9	27.99	High	High	High	High	High	High	1		3	3	Present Both	1	GLYMA_06G317500	GLYMA_06G317500	sp|O04331|PHB3_ARATH	Prohibitin-3, mitochondrial GN=PHB3	ident:228/279 pos:259/279 query:279 hit:277 align:275 bit:479.9	OK	Prohibitin-3, mitochondrial (Atphb3)	Protein ENHANCED ETHYLENE RESPONSE 3	PHB3_ARATH	O04331	na	PHB3	EER3	Arabidopsis thaliana (Mouse-ear cress)
High	Master Protein	GLYMA_08G232000		K17080 - prohibitin 1 (PHB1) (1 of 3)	0	422.582	89	25	193	8	280	30.5	8.35	805.69	25	0	1.012	0.996833	78.3	106.8	93.2	8.7	33.14	High	High	High	High	High	High	1		3	3	Present Both	1	GLYMA_08G232000	GLYMA_08G232000	sp|O04331|PHB3_ARATH	Prohibitin-3, mitochondrial GN=PHB3	ident:230/280 pos:263/280 query:280 hit:277 align:276 bit:486.5	OK	Prohibitin-3, mitochondrial (Atphb3)	Protein ENHANCED ETHYLENE RESPONSE 3	PHB3_ARATH	O04331	na	PHB3	EER3	Arabidopsis thaliana (Mouse-ear cress)
High	Master Protein	GLYMA_09G173500		K17081 - prohibitin 2 (PHB2) (1 of 4)	0	184.958	72	19	107	5	289	31.8	9.72	411.82	19	0	0.597	0.80212	27.76	122.7	77.3	40.76	16.67	High	High	High	High	High	High	1		3	3	Present Both	1	GLYMA_09G173500	GLYMA_09G173500	sp|Q9ZNT7|PHB2_ARATH	Prohibitin-2, mitochondrial GN=PHB2	ident:236/289 pos:268/289 query:289 hit:286 align:282 bit:480.7	OK	Prohibitin-2, mitochondrial (Atphb2)	na	PHB2_ARATH	Q9ZNT7	F4I2J2	PHB2	na	Arabidopsis thaliana (Mouse-ear cress)
High	Master Protein	GLYMA_11G109400		K17081 - prohibitin 2 (PHB2) (1 of 4)	0	197.194	69	17	92	5	289	31.8	9.42	354.47	17	2	0.775	0.996833	52.89	128.8	71.2	41.34	16.43	High	High	High	High	High	High	1		3	3	Present Both	1	GLYMA_11G109400	GLYMA_11G109400	sp|Q9SIL6|PHB6_ARATH	Prohibitin-6, mitochondrial GN=PHB6	ident:237/289 pos:264/289 query:289 hit:286 align:289 bit:466.1	OK	Prohibitin-6, mitochondrial (Atphb6)	na	PHB6_ARATH	Q9SIL6	na	PHB6	na	Arabidopsis thaliana (Mouse-ear cress)
High	Master Protein	GLYMA_12G207500		K17081 - prohibitin 2 (PHB2) (1 of 4)	0	191.243	62	20	105	6	336	37.1	9.63	372.5	20	13	1.264	0.970114	80.94	96.7	103.3	40.63	30.21	High	High	High	High	High	High	1		3	3	Present Both	1	GLYMA_12G207500	GLYMA_12G207500	sp|Q9ZNT7|PHB2_ARATH	Prohibitin-2, mitochondrial GN=PHB2	ident:236/336 pos:267/336 query:336 hit:286 align:282 bit:477.6	OK	Prohibitin-2, mitochondrial (Atphb2)	na	PHB2_ARATH	Q9ZNT7	F4I2J2	PHB2	na	Arabidopsis thaliana (Mouse-ear cress)
High	Master Protein	GLYMA_13G199800		K17095 - annexin A7/11 (ANXA7_11) (1 of 9)	0	180.893	67	27	108	10	313	35.7	7.31	278.68	27	16	1.505	0.817125	51.44	76.6	123.4	17.82	12.09	High	High	High	High	High	High	1		3	3	Present Both	1	GLYMA_13G199800	GLYMA_13G199800	sp|Q94CK4|ANXD8_ARATH	Annexin D8 GN=ANNAT8	ident:177/313 pos:243/313 query:313 hit:316 align:311 bit:371.7	OK	Annexin D8	AnnAt8	ANXD8_ARATH	Q94CK4	na	ANNAT8	ANN8	Arabidopsis thaliana (Mouse-ear cress)
High	Master Protein	GLYMA_13G200000		K17099 - annexin A13 (ANXA13) (1 of 2)	0	14.648	9	3	8	3	314	36.1	8.13	7.17	3	0	0.916	0.996833	32.61	107.1	92.9	13.17	19.04	High	High	High	High	High	Peak Found	1		3	3	Present Both	1	GLYMA_13G200000	GLYMA_13G200000	sp|Q9ZVJ6|ANXD4_ARATH	Annexin D4 GN=ANN4	ident:177/314 pos:234/314 query:314 hit:319 align:318 bit:348.2	OK	Annexin D4	AnnAt4	ANXD4_ARATH	Q9ZVJ6	na	ANN4	ANNAT4	Arabidopsis thaliana (Mouse-ear cress)
High	Master Protein	GLYMA_11G118600		K17267 - coatomer protein complex, subunit gamma (COPG) (1 of 4)	0	10.696	5	3	6	3	887	98.7	5.15	12.24	3	0	0.922	0.996833	23.04	104	96	25.42		High	High	Not Found	High	High	Peak Found	1		2	3	Present Both	1	GLYMA_11G118600	GLYMA_11G118600	sp|Q0WW26|COPG_ARATH	Coatomer subunit gamma GN=COQ5	ident:755/887 pos:819/887 query:887 hit:886 align:887 bit:1569.7	OK	Coatomer subunit gamma	Gamma-coat protein (Gamma-COP)	COPG_ARATH	Q0WW26	O65673; Q56X38	OrderedLocusNames=At4g34450	na	Arabidopsis thaliana (Mouse-ear cress)
High	Master Protein	GLYMA_07G004100		K17301 - coatomer, subunit beta (COPB1, SEC26) (1 of 2)	0	14.116	3	2	3	2	950	106	5.87	8.96	2	0	0.498	0.560634	4.29	117.3	82.7	43.02	35.34	High	High	Peak Found	Peak Found	Peak Found	Peak Found	1		3	3	Present Both	1	GLYMA_07G004100	GLYMA_07G004100	sp|Q9SV21|COPB1_ARATH	Coatomer subunit beta-1 GN=GSH3	ident:787/950 pos:883/950 query:950 hit:948 align:950 bit:1649.8	OK	Coatomer subunit beta-1	Beta-coat protein 1 (Beta-COP 1)	COPB1_ARATH	Q9SV21	na	OrderedLocusNames=At4g31480	na	Arabidopsis thaliana (Mouse-ear cress)
High	Master Protein	GLYMA_08G180400		K17470 - sulfate transporter 1, high-affinity (SULTR1) (1 of 6)	0	33.437	8	4	5	4	657	71.9	9.32	21.88	4	0	0.412	0.304619	2.71	186.1	13.9	12.15		High	High	Not Found	Not Found	Not Found	Peak Found	1		2	1	Only Control	1	GLYMA_08G180400	GLYMA_08G180400	sp|Q9FEP7|SUT13_ARATH	Sulfate transporter 1.3 GN=SULTR1	ident:466/657 pos:545/657 query:657 hit:656 align:646 bit:917.5	OK	Sulfate transporter 1.3	na	SUT13_ARATH	Q9FEP7	Q9LM44	SULTR1	na	Arabidopsis thaliana (Mouse-ear cress)
High	Master Protein	GLYMA_12G241900		K17541 - SCY1-like protein 2 (SCYL2) (1 of 2)	0	20.28	5	3	4	3	928	100.6	7.25	11.38	3	0	0.537	0.677089	4.38	172.3	27.7	23.24	57.41	High	High	High	Peak Found	Not Found	Peak Found	1		3	2	Present Both	1	GLYMA_12G241900	GLYMA_12G241900	sp|Q94C95|ATG1A_ARATH	Serine/threonine-protein kinase ATG1a GN=ATG1A	ident:80/928 pos:135/928 query:928 hit:626 align:315 bit:71.6	Partial_match_both	Serine/threonine-protein kinase ATG1a	Autophagy-related protein 1a (AtAPG1a)	ATG1A_ARATH	Q94C95	Q9M269	ATG1A	na	Arabidopsis thaliana (Mouse-ear cress)
High	Master Protein	GLYMA_08G346200		K17732 - mitochondrial-processing peptidase subunit beta [EC:3.4.24.64] (PMPCB, MAS1) (1 of 3)	0	262.673	57	27	143	9	528	58.9	6.98	471.19	27	17	0.952	0.999744	52.52	113.2	86.8	32.93	21.08	High	High	High	High	High	High	1		3	3	Present Both	1	GLYMA_08G346200	GLYMA_08G346200	sp|Q42290|MPPB_ARATH	Probable mitochondrial-processing peptidase subunit beta, mitochondrial GN=MORF8	ident:415/528 pos:470/528 query:528 hit:531 align:534 bit:878.2	OK	Probable mitochondrial-processing peptidase subunit beta, mitochondrial	Beta-MPP	MPPB_ARATH	Q42290	Q0WWT6; Q9SGA7	OrderedLocusNames=At3g02090	na	Arabidopsis thaliana (Mouse-ear cress)
High	Master Protein	GLYMA_16G087200		K17732 - mitochondrial-processing peptidase subunit beta [EC:3.4.24.64] (PMPCB, MAS1) (1 of 3)	0	209.738	37	18	109	7	523	58.5	6.73	359.17	18	0	0.914	0.996833	52.75	113.1	86.9	30.06	42.38	High	High	High	High	High	High	1		3	3	Present Both	1	GLYMA_16G087200	GLYMA_16G087200	sp|Q42290|MPPB_ARATH	Probable mitochondrial-processing peptidase subunit beta, mitochondrial GN=MORF8	ident:409/523 pos:467/523 query:523 hit:531 align:531 bit:852.4	OK	Probable mitochondrial-processing peptidase subunit beta, mitochondrial	Beta-MPP	MPPB_ARATH	Q42290	Q0WWT6; Q9SGA7	OrderedLocusNames=At3g02090	na	Arabidopsis thaliana (Mouse-ear cress)
High	Master Protein	GLYMA_18G156500		K17732 - mitochondrial-processing peptidase subunit beta [EC:3.4.24.64] (PMPCB, MAS1) (1 of 3)	0	210.844	55	25	118	7	527	58.8	6.99	368.33	25	0	1.131	0.996833	64.06	113.6	86.4	27.61	34.74	High	High	High	High	High	High	1		3	3	Present Both	1	GLYMA_18G156500	GLYMA_18G156500	sp|Q42290|MPPB_ARATH	Probable mitochondrial-processing peptidase subunit beta, mitochondrial GN=MORF8	ident:414/527 pos:470/527 query:527 hit:531 align:531 bit:870.9	OK	Probable mitochondrial-processing peptidase subunit beta, mitochondrial	Beta-MPP	MPPB_ARATH	Q42290	Q0WWT6; Q9SGA7	OrderedLocusNames=At3g02090	na	Arabidopsis thaliana (Mouse-ear cress)
High	Master Protein	GLYMA_10G040200		K17769 - mitochondrial import receptor subunit TOM22 (TOM22) (1 of 4)	0	77.469	57	6	57	5	97	10.3	10.26	197.02	6	1	2.005	0.421476	73.58	56	144	58.46	36.76	High	High	High	High	High	High	1		3	3	Present Both	1	GLYMA_10G040200	GLYMA_10G040200	sp|Q9FNC9|TOM92_ARATH	Mitochondrial import receptor subunit TOM9-2 GN=TOM9-2	ident:59/97 pos:74/97 query:97 hit:99 align:94 bit:115.5	OK	Mitochondrial import receptor subunit TOM9-2	Mitochondrial import receptor subunit TOM22 homolog 2; Translocase of outer membrane 22 kDa subunit homolog 2; Translocase of outer membrane 9 kDa subunit TOM9-2	TOM92_ARATH	Q9FNC9	na	TOM9-2	TOM22-2	Arabidopsis thaliana (Mouse-ear cress)
High	Master Protein	GLYMA_13G126900		K17769 - mitochondrial import receptor subunit TOM22 (TOM22) (1 of 4)	0	84.203	57	6	50	5	97	10.3	10.26	175.62	6	0	1.877	0.515672	75.77	67	133	76.09	29.81	High	High	High	High	High	High	1		3	3	Present Both	1	GLYMA_13G126900	GLYMA_13G126900	sp|Q9FNC9|TOM92_ARATH	Mitochondrial import receptor subunit TOM9-2 GN=TOM9-2	ident:60/97 pos:75/97 query:97 hit:99 align:94 bit:119.8	OK	Mitochondrial import receptor subunit TOM9-2	Mitochondrial import receptor subunit TOM22 homolog 2; Translocase of outer membrane 22 kDa subunit homolog 2; Translocase of outer membrane 9 kDa subunit TOM9-2	TOM92_ARATH	Q9FNC9	na	TOM9-2	TOM22-2	Arabidopsis thaliana (Mouse-ear cress)
High	Master Protein	GLYMA_03G082300		K17777 - mitochondrial import inner membrane translocase subunit TIM9 (TIM9) (1 of 3)	0	45.759	63	6	23	6	94	11.1	7.74	74.73	6	0	0.943	0.998649	50.6	111.3	88.7	43.07	15.93	High	High	High	High	High	High	1	Acetyl [N-Term]	3	3	Present Both	1	GLYMA_03G082300	GLYMA_03G082300	sp|Q9XGX9|TIM9_ARATH	Mitochondrial import inner membrane translocase subunit TIM9 GN=TIM9	ident:57/94 pos:80/94 query:94 hit:93 align:93 bit:132.9	OK	Mitochondrial import inner membrane translocase subunit TIM9	Protein EMBRYO DEFECTIVE 2474	TIM9_ARATH	Q9XGX9	Q8L927; Q9SNC2	TIM9	EMB2474	Arabidopsis thaliana (Mouse-ear cress)
High	Master Protein	GLYMA_11G139400		K17777 - mitochondrial import inner membrane translocase subunit TIM9 (TIM9) (1 of 3)	0	140.124	62	8	89	8	93	10.8	7.21	305.31	8	0	0.781	0.996833	35.62	118.8	81.2	26.65	18.3	High	High	High	High	High	High	1	Acetyl [N-Term]	3	3	Present Both	1	GLYMA_11G139400	GLYMA_11G139400	sp|Q9XGX9|TIM9_ARATH	Mitochondrial import inner membrane translocase subunit TIM9 GN=TIM9	ident:75/93 pos:80/93 query:93 hit:93 align:93 bit:157.5	OK	Mitochondrial import inner membrane translocase subunit TIM9	Protein EMBRYO DEFECTIVE 2474	TIM9_ARATH	Q9XGX9	Q8L927; Q9SNC2	TIM9	EMB2474	Arabidopsis thaliana (Mouse-ear cress)
High	Master Protein	GLYMA_08G367400		K17781 - mitochondrial import inner membrane translocase subunit TIM13 (TIM13) (1 of 2)	0	60.639	62	6	37	3	86	9.4	8.18	119.5	6	3	0.69	0.945815	37.86	113.3	86.7	22.03	19.97	High	High	High	High	High	High	1	Acetyl [N-Term]	3	3	Present Both	1	GLYMA_08G367400	GLYMA_08G367400	sp|Q9XH48|TIM13_ARATH	Mitochondrial import inner membrane translocase subunit TIM13 GN=TIM13	ident:51/86 pos:67/86 query:86 hit:87 align:85 bit:85.9	OK	Mitochondrial import inner membrane translocase subunit TIM13	na	TIM13_ARATH	Q9XH48	Q94KC4; Q9SY93	TIM13	na	Arabidopsis thaliana (Mouse-ear cress)
High	Master Protein	GLYMA_04G256400		K17784 - mitochondrial inner membrane organizing system protein 1 (MINOS1, MOS1) (1 of 2)	0	16.456	44	3	14	3	97	10.5	5.4	31.83	3	0	1.058	0.996833	18.73	96.3	103.7	3.74	11.66	High	High	High	High	High	High	1		3	3	Present Both	1	GLYMA_04G256400	GLYMA_04G256400	sp|Q67ZE1|HSDD2_ARATH	3beta-hydroxysteroid-dehydrogenase/decarboxylase isoform 2 GN=3BETAHSD/D2	ident:10/97 pos:19/97 query:97 hit:564 align:29 bit:27.3	Partial_match_both	3beta-hydroxysteroid-dehydrogenase/decarboxylase isoform 2 (At3BETAHSD/D2)	4alpha-carboxysterol-C3-dehydrogenase/C4-decarboxylase isoform 1-2; Reticulon-like protein B19 (AtRTNLB19); Sterol-4-alpha-carboxylate 3-dehydrogenase 2, decarboxylating	HSDD2_ARATH	Q67ZE1	O64845	3BETAHSD/D2	RTNLB19	Arabidopsis thaliana (Mouse-ear cress)
High	Master Protein	GLYMA_01G007700		K17795 - mitochondrial import inner membrane translocase subunit TIM17 (TIM17) (1 of 3)	0	43.624	35	4	14	4	200	20.9	5.12	46.75	4	0	0.376	0.208491	3.58	152.5	47.5	67.41	24.32	High	High	High	High	High	High	1		3	3	Present Both	1	GLYMA_01G007700	GLYMA_01G007700	sp|Q9SP35|TI172_ARATH	Mitochondrial import inner membrane translocase subunit TIM17-2 GN=TIM17-2	ident:150/200 pos:167/200 query:200 hit:243 align:243 bit:280.4	OK	Mitochondrial import inner membrane translocase subunit TIM17-2	na	TI172_ARATH	Q9SP35	Q9ZUS5	TIM17-2	na	Arabidopsis thaliana (Mouse-ear cress)
High	Master Protein	GLYMA_08G125700		K17800 - LETM1 and EF-hand domain-containing protein 1, mitochondrial (LETM1, MDM38) (1 of 5)	0	12.278	3	2	4	2	738	83.8	5.94	9.89	2	0	0.707	0.95401	4.68	117.2	82.8	12.69	8.2	High	Peak Found	Peak Found	High	High	High	1		3	3	Present Both	1	GLYMA_08G125700	GLYMA_08G125700	sp|O23184|CML19_ARATH	Calcium-binding protein CML19 GN=CML19	ident:14/738 pos:35/738 query:738 hit:167 align:56 bit:40.0	Partial_match_both	Calcium-binding protein CML19	Calmodulin-like protein 19; Centrin 2 (AtCEN2)	CML19_ARATH	O23184	Q8LCE6	CML19	na	Arabidopsis thaliana (Mouse-ear cress)
High	Master Protein	GLYMA_02G080100		K17805 - mitochondrial import inner membrane translocase subunit TIM16 (PAM16, TIM16) (1 of 3)	0	22.983	55	4	10	4	117	12.9	9.33	30.93	4	0	0.869	0.996833	49.12	102.2	97.8	23.09	20.72	High	High	High	High	High	High	1		3	3	Present Both	1	GLYMA_02G080100	GLYMA_02G080100	sp|Q93VV9|TM16B_ARATH	Mitochondrial import inner membrane translocase subunit PAM16 like 2 GN=PAM16L2	ident:85/117 pos:98/117 query:117 hit:116 align:115 bit:179.5	OK	Mitochondrial import inner membrane translocase subunit PAM16 like 2 (AtPAM16; AtPAM16L2)	Presequence translocated-associated motor subunit PAM16; Protein MUTANT SNC1-ENHANCING 5; Protein THAXTOMIN A RESISTANT 1	TM16B_ARATH	Q93VV9	Q9LX43	PAM16L2	na	Arabidopsis thaliana (Mouse-ear cress)
High	Master Protein	GLYMA_07G189900		K17871 - NADH:ubiquinone reductase (non-electrogenic) (ndh1) (1 of 12)	0	24.849	5	2	17	2	580	65.2	7.65	54.98	2	0	1.038	0.996833	39.69	101.6	98.4	12.59	13.6	High	High	High	High	High	High	1		3	3	Present Both	1	GLYMA_07G189900	GLYMA_07G189900	sp|Q94BV7|NDB2_ARATH	External alternative NAD(P)H-ubiquinone oxidoreductase B2, mitochondrial GN=NDB2	ident:435/580 pos:501/580 query:580 hit:582 align:586 bit:896.3	OK	External alternative NAD(P)H-ubiquinone oxidoreductase B2, mitochondrial	External alternative NADH dehydrogenase NDB2; NADH:ubiquinone reductase (non-electrogenic) NDB2	NDB2_ARATH	Q94BV7	Q9S9T5	NDB2	na	Arabidopsis thaliana (Mouse-ear cress)
High	Master Protein	GLYMA_18G021100		K18592 - gamma-glutamyltranspeptidase / glutathione hydrolase / leukotriene-C4 hydrolase (GGT1_5) (1 of 3)	0	38.143	10	3	6	3	624	67.2	9.41	17.58	3	0	0.291	0.0554832	1.79	173.5	26.5	92.65		High	High	Not Found	Not Found	Not Found	High	1		2	1	Only Control	1	GLYMA_18G021100	GLYMA_18G021100	sp|Q8VYW6|GAGT1_ARATH	Glutathione hydrolase 1 GN=GGT1	ident:368/624 pos:434/624 query:624 hit:572 align:560 bit:736.1	OK	Glutathione hydrolase 1	Gamma-glutamyltransferase 1; Gamma-glutamyltranspeptidase 1	GAGT1_ARATH	Q8VYW6	B9DI67; O65652	GGT1	na	Arabidopsis thaliana (Mouse-ear cress)
High	Master Protein	GLYMA_11G096400		KOG0933//KOG4643 - Structural maintenance of chromosome protein 2 (chromosome condensation complex Condensin, subunit E) // Uncharacterized coiled-coil protein (1 of 1)	0	120.21	20	20	58	7	1357	153.2	4.7	147.62	20	8	0.866	0.996833	51.76	63.8	136.2	82.83	57.03	High	High	High	High	High	High	1		3	3	Present Both	1	GLYMA_11G096400	GLYMA_11G096400	sp|F4JZY1|CIP1_ARATH	COP1-interactive protein 1 GN=CIP1	ident:218/1357 pos:386/1357 query:1357 hit:1586 align:875 bit:45.8	Partial_match_hit	COP1-interactive protein 1	na	CIP1_ARATH	F4JZY1	Q38843; Q9FJ35	CIP1	na	Arabidopsis thaliana (Mouse-ear cress)
High	Master Protein	GLYMA_04G038600		KOG0963//KOG0978 - Transcription factor/CCAAT displacement protein CDP1 // E3 ubiquitin ligase involved in syntaxin degradation (1 of 2)	0.001	2.483	1	1	2	1	973	106.7	4.84	1.72	1	0	0.497	0.560407	5.7	133.6	66.4	25.63	11.44	High	Peak Found	Peak Found	Peak Found	Peak Found	High	1		3	3	Present Both	1	GLYMA_04G038600	GLYMA_04G038600	sp|O48724|WEB1_ARATH	Protein WEAK CHLOROPLAST MOVEMENT UNDER BLUE LIGHT 1 GN=WEB1	ident:447/973 pos:540/973 query:973 hit:807 align:660 bit:818.5	Poor_match	Protein WEAK CHLOROPLAST MOVEMENT UNDER BLUE LIGHT 1 (Protein WEB1)	na	WEB1_ARATH	O48724	Q0WQC5	WEB1	na	Arabidopsis thaliana (Mouse-ear cress)
High	Master Protein	GLYMA_06G080100		KOG1003 - Actin filament-coating protein tropomyosin (1 of 28)	0	165.918	43	23	84	23	446	50.8	9.29	262.02	23	0	0.819	0.996833	68.02	78.2	121.8	52.75	63	High	High	High	High	High	High	1		3	3	Present Both	1	GLYMA_06G080100	GLYMA_06G080100	sp|F4IJK6|KN14R_ARATH	Kinesin-like protein KIN-14R GN=KIN14R	ident:43/446 pos:84/446 query:446 hit:1083 align:167 bit:35.4	Partial_match_both	Kinesin-like protein KIN-14R	na	KN14R_ARATH	F4IJK6	F4IJK7; Q9ZQ52	KIN14R	na	Arabidopsis thaliana (Mouse-ear cress)
High	Master Protein	GLYMA_06G066400		KOG3306 - Predicted membrane protein (1 of 2)	0	64.925	44	11	47	2	209	23.3	8.76	123.11	11	10	0.946	0.999168	51.61	72.4	127.6	88.36	60.71	High	High	High	High	High	Not Found	1		3	2	Present Both	1	GLYMA_06G066400	GLYMA_06G066400	sp|Q8VY97|Y4213_ARATH	ER membrane protein complex subunit 7 homolog GN=CBSCBSPB1	ident:129/209 pos:151/209 query:209 hit:202 align:177 bit:252.3	OK	ER membrane protein complex subunit 7 homolog	na	Y4213_ARATH	Q8VY97	O49379	OrderedLocusNames=At4g32130	na	Arabidopsis thaliana (Mouse-ear cress)
High	Master Protein	GLYMA_07G239500		KOG3450 - Huntingtin interacting protein HYPK (1 of 4)	0	112.774	69	9	35	2	110	12.3	5.24	163.72	9	0	0.533	0.661502	18.9	142	58	41.75	72.65	High	High	Peak Found	Peak Found	Peak Found	High	1	Acetyl [N-Term]	3	3	Present Both	1	GLYMA_07G239500	GLYMA_07G239500	sp|Q94JX9|NACA2_ARATH	Nascent polypeptide-associated complex subunit alpha-like protein 2 GN=NAC096	ident:12/110 pos:22/110 query:110 hit:217 align:38 bit:28.1	Partial_match_both	Nascent polypeptide-associated complex subunit alpha-like protein 2 (NAC-alpha-like protein 2)	Alpha-NAC-like protein 2	NACA2_ARATH	Q94JX9	Q9S7G0	OrderedLocusNames=At3g49470	na	Arabidopsis thaliana (Mouse-ear cress)
High	Master Protein	GLYMA_09G035300		KOG3450 - Huntingtin interacting protein HYPK (1 of 4)	0	104.592	84	9	47	6	110	12.2	5.07	172.65	9	0	0.352	0.156249	10.57	165.4	34.6	49.76	21.18	High	High	High	High	High	High	1	Acetyl [N-Term]	3	3	Present Both	1	GLYMA_09G035300	GLYMA_09G035300	sp|Q9M3D6|AB19G_ARATH	ABC transporter G family member 19 GN=ABCG19	ident:16/110 pos:26/110 query:110 hit:725 align:51 bit:27.3	Partial_match_both	ABC transporter G family member 19 (ABC transporter ABCG.19; AtABCG19)	White-brown complex homolog protein 19 (AtWBC19)	AB19G_ARATH	Q9M3D6	na	ABCG19	WBC19	Arabidopsis thaliana (Mouse-ear cress)
High	Master Protein	GLYMA_15G139900		KOG3450 - Huntingtin interacting protein HYPK (1 of 4)	0	144.5	93	11	42	4	110	12.2	5.08	195.93	11	5	0.483	0.51933	16.39	149.1	50.9	50.48	6.6	High	High	High	Peak Found	High	High	1	Acetyl [N-Term]	3	3	Present Both	1	GLYMA_15G139900	GLYMA_15G139900	sp|Q38932|LCYE_ARATH	Lycopene epsilon cyclase, chloroplastic GN=LUT2	ident:20/110 pos:34/110 query:110 hit:524 align:61 bit:28.9	Partial_match_hit	Lycopene epsilon cyclase, chloroplastic	Protein LUTEIN DEFICIENT 2	LCYE_ARATH	Q38932	Q9LDV8	LUT2	na	Arabidopsis thaliana (Mouse-ear cress)
High	Master Protein	GLYMA_13G047900		KOG4002 - Uncharacterized integral membrane protein (1 of 1)	0	50.7	20	7	32	2	396	45.8	9.41	106.43	7	4	1.534	0.786682	80.47	65.2	134.8	88.96	47.48	High	High	High	High	High	High	1		3	3	Present Both	1	GLYMA_13G047900	GLYMA_13G047900	sp|O80638|WTR14_ARATH	WAT1-related protein At2g39510 GN=WRKY3	ident:33/396 pos:51/396 query:396 hit:374 align:122 bit:34.7	Partial_match_both	WAT1-related protein At2g39510	na	WTR14_ARATH	O80638	na	OrderedLocusNames=At2g39510	na	Arabidopsis thaliana (Mouse-ear cress)
High	Master Protein	GLYMA_04G030800		KOG4042 - Dynactin subunit p27/WS-3, involved in transport of organelles along microtubules (1 of 1)	0	200.901	66	15	111	6	276	30	6.71	408.02	15	11	1.016	0.996833	49.19	80.8	119.2	34.77	17.59	High	High	High	High	High	High	1		3	3	Present Both	1	GLYMA_04G030800	GLYMA_04G030800	sp|Q9FWR5|GCA1_ARATH	Gamma carbonic anhydrase 1, mitochondrial GN=GAMMACA1	ident:225/276 pos:245/276 query:276 hit:275 align:269 bit:474.6	OK	Gamma carbonic anhydrase 1, mitochondrial (AtCA1; GAMMA CA1)	na	GCA1_ARATH	Q9FWR5	Q67XH5; Q682H9; Q8LF67; Q9LN36	GAMMACA1	na	Arabidopsis thaliana (Mouse-ear cress)
High	Master Protein	GLYMA_05G051800		KOG4083 - Head-elevated expression protein (1 of 1)	0	44.854	9	2	17	2	168	19.1	8.15	52.22	2	0	1.166	0.996833	60.35	92.8	107.2	48.94	16.43	High	High	High	High	High	High	1		3	3	Present Both	1	GLYMA_05G051800	GLYMA_05G051800	sp|P93004|PIP27_ARATH	Aquaporin PIP2-7 GN=PIP2-7	ident:16/168 pos:24/168 query:168 hit:280 align:44 bit:26.9	Partial_match_both	Aquaporin PIP2-7	Plasma membrane intrinsic protein 2-7 (AtPIP2;7); Plasma membrane intrinsic protein 3; Salt stress-induced major intrinsic protein	PIP27_ARATH	P93004	O22332; O49616	PIP2-7	PIP3; SIMIP	Arabidopsis thaliana (Mouse-ear cress)
High	Master Protein	GLYMA_08G290400		KOG4401 - Uncharacterized conserved protein (1 of 2)	0	42.935	43	4	12	4	186	20.5	5.68	42.43	4	0	0.565	0.741159	19.21	56	144	80.18	41.56	High	High	High	High	High	High	1		3	3	Present Both	1	GLYMA_08G290400	GLYMA_08G290400	sp|Q9LIP6|C71BV_ARATH	Cytochrome P450 71B34 GN=CYP71B34	ident:29/186 pos:46/186 query:186 hit:500 align:110 bit:28.9	Partial_match_hit	Cytochrome P450 71B34	na	C71BV_ARATH	Q9LIP6	C0Z3G7	CYP71B34	na	Arabidopsis thaliana (Mouse-ear cress)
High	Master Protein	GLYMA_05G139900		KOG4467 - Uncharacterized conserved protein (1 of 4)	0	57.865	18	8	32	8	597	65.9	8.69	98.43	8	0	1.284	0.953816	88.12	55.7	144.3	85.49	40.16	High	High	High	High	High	High	1		3	3	Present Both	1	GLYMA_05G139900	GLYMA_05G139900	sp|Q94A41|AMY3_ARATH	Alpha-amylase 3, chloroplastic GN=AMY3	ident:20/597 pos:32/597 query:597 hit:887 align:67 bit:32.0	Partial_match_both	Alpha-amylase 3, chloroplastic (AtAMY3)	1,4-alpha-D-glucan glucanohydrolase	AMY3_ARATH	Q94A41	Q9CAR6	AMY3	na	Arabidopsis thaliana (Mouse-ear cress)
High	Master Protein	GLYMA_08G340600		KOG4618 - Uncharacterized conserved protein (1 of 1)	0.001	2.572	15	1	6	1	71	8.2	9	13.12	1	0	0.792	0.996833	25.26	114.8	85.2	41.93	19.03	High	High	High	High	High	High	1		3	3	Present Both	1	GLYMA_08G340600	GLYMA_08G340600	sp|Q9CAU0|SCP6_ARATH	Serine carboxypeptidase-like 6 GN=SCPL6	ident:13/71 pos:16/71 query:71 hit:452 align:31 bit:26.2	Partial_match_both	Serine carboxypeptidase-like 6	na	SCP6_ARATH	Q9CAU0	na	SCPL6	na	Arabidopsis thaliana (Mouse-ear cress)
High	Master Protein	GLYMA_13G356900		KOG4673 - Transcription factor TMF, TATA element modulatory factor (1 of 2)	0	3.675	2	1	1	1	989	112	4.79	2.63	1	0	0.905	0.996833	0	105	95			High	Not Found	Not Found	Not Found	Not Found	Peak Found	1		1	1	Missing Both	1	GLYMA_13G356900	GLYMA_13G356900	sp|Q0WVL7|GOGC5_ARATH	Golgin candidate 5 GN=GC5	ident:626/989 pos:749/989 query:989 hit:956 align:999 bit:1063.1	OK	Golgin candidate 5 (AtGC5)	na	GOGC5_ARATH	Q0WVL7	Q56X06; Q9CA88	GC5	na	Arabidopsis thaliana (Mouse-ear cress)
High	Master Protein	GLYMA_17G119800		PF00069//PF00560//PF08263 - Protein kinase domain (Pkinase) // Leucine Rich Repeat (LRR_1) // Leucine rich repeat N-terminal domain (LRRNT_2) (1 of 39)	0	19.598	7	4	15	4	650	71	7.94	33.57	4	0	1.053	0.996833	25.63	79.3	120.7	28.5	4.97	High	High	High	High	High	High	1		3	3	Present Both	1	GLYMA_17G119800	GLYMA_17G119800	sp|O48788|Y2267_ARATH	Probable inactive receptor kinase At2g26730 GN=VHA-c3	ident:466/650 pos:535/650 query:650 hit:658 align:660 bit:898.3	OK	Probable inactive receptor kinase At2g26730	na	Y2267_ARATH	O48788	Q949V3	OrderedLocusNames=At2g26730	na	Arabidopsis thaliana (Mouse-ear cress)
High	Master Protein	GLYMA_02G244400		PF00069//PF08263 - Protein kinase domain (Pkinase) // Leucine rich repeat N-terminal domain (LRRNT_2) (1 of 37)	0	15.247	5	3	11	2	612	66.4	7.5	24.02	3	0	1.12	0.996833	27.52	88	112	35.08	6.07	High	High	High	High	High	High	1		3	3	Present Both	1	GLYMA_02G244400	GLYMA_02G244400	sp|Q9LP77|Y1848_ARATH	Probable inactive receptor kinase At1g48480 GN=RKL1	ident:329/612 pos:406/612 query:612 hit:655 align:613 bit:602.4	OK	Probable inactive receptor kinase At1g48480	na	Y1848_ARATH	Q9LP77	B9DHQ4; Q9ZT08	RKL1	na	Arabidopsis thaliana (Mouse-ear cress)
High	Master Protein	GLYMA_01G015500		PF00076 - RNA recognition motif. (a.k.a. RRM, RBD, or RNP domain) (RRM_1) (1 of 477)	0	190.754	61	14	72	5	279	29.8	6.4	265.34	14	0	1.292	0.947467	58.76	92.2	107.8	21.78	26.39	High	High	High	High	High	High	1	Phospho [S257]	3	3	Present Both	1	GLYMA_01G015500	GLYMA_01G015500	sp|Q9LFD5|BPA1_ARATH	Binding partner of ACD11 1 GN=BPA1	ident:150/279 pos:194/279 query:279 hit:259 align:234 bit:298.1	OK	Binding partner of ACD11 1	na	BPA1_ARATH	Q9LFD5	A8MQX8; A8MSB5; C0Z220; Q93Z43	BPA1	na	Arabidopsis thaliana (Mouse-ear cress)
High	Master Protein	GLYMA_09G206900		PF00076 - RNA recognition motif. (a.k.a. RRM, RBD, or RNP domain) (RRM_1) (1 of 477)	0	225.705	62	15	82	6	280	29.8	6.15	291.89	15	12	1.028	0.996833	72.87	67.3	132.7	35.84	59.25	High	High	High	High	High	High	1	Phospho [S258]	3	3	Present Both	1	GLYMA_09G206900	GLYMA_09G206900	sp|Q9LFD5|BPA1_ARATH	Binding partner of ACD11 1 GN=BPA1	ident:152/280 pos:194/280 query:280 hit:259 align:236 bit:302.8	OK	Binding partner of ACD11 1	na	BPA1_ARATH	Q9LFD5	A8MQX8; A8MSB5; C0Z220; Q93Z43	BPA1	na	Arabidopsis thaliana (Mouse-ear cress)
High	Master Protein	GLYMA_11G117300		PF00076 - RNA recognition motif. (a.k.a. RRM, RBD, or RNP domain) (RRM_1) (1 of 477)	0	77.515	46	8	40	3	171	16.6	5.63	152.29	8	6	0.893	0.996833	36.88	116.3	83.7	35.7	15.88	High	High	High	High	High	High	1		3	3	Present Both	1	GLYMA_11G117300	GLYMA_11G117300	sp|Q03250|RBG7_ARATH	Glycine-rich RNA-binding protein 7 GN=RBG7	ident:70/171 pos:81/171 query:171 hit:176 align:85 bit:154.5	Partial_match_both	Glycine-rich RNA-binding protein 7 (AtGR-RBP7)	AtRBG7; Glycine-rich protein 7 (AtGRP7); Protein COLD, CIRCADIAN RHYTHM, AND RNA BINDING 2 (Protein CCR2)	RBG7_ARATH	Q03250	C0Z304; Q8LEV4; Q94B62	RBG7	CCR2; GR-RBP7; GRP7	Arabidopsis thaliana (Mouse-ear cress)
High	Master Protein	GLYMA_02G156800		PF00139 - Legume lectin domain (Lectin_legB) (1 of 90)	0	47.789	38	6	6	6	297	31.9	7.05	20.17	6	0	0.246	0.0184746	0	176.9	23.1	137.22		High	Peak Found	Not Found	Not Found	Not Found	Peak Found	1		2	1	Only Control	1	GLYMA_02G156800	GLYMA_02G156800	sp|Q9LXA5|LRK91_ARATH	L-type lectin-domain containing receptor kinase IX.1 GN=LECRK91	ident:85/297 pos:125/297 query:297 hit:651 align:249 bit:112.1	Partial_match_hit	L-type lectin-domain containing receptor kinase IX.1 (LecRK-IX.1)	na	LRK91_ARATH	Q9LXA5	na	LECRK91	na	Arabidopsis thaliana (Mouse-ear cress)
High	Master Protein	GLYMA_09G045700		PF00168 - C2 domain (C2) (1 of 196)	0	34.211	21	6	26	6	290	30.8	6.64	59.29	6	0	0.801	0.996833	18.82	135.8	64.2	28.4	36.8	High	High	High	High	High	High	1		3	3	Present Both	1	GLYMA_09G045700	GLYMA_09G045700	sp|O04023|SRC2_ARATH	Protein SRC2 homolog GN=SRC2	ident:124/290 pos:162/290 query:290 hit:324 align:287 bit:166.0	Poor_match	Protein SRC2 homolog (AtSRC2)	na	SRC2_ARATH	O04023	O81814	SRC2	na	Arabidopsis thaliana (Mouse-ear cress)
High	Master Protein	GLYMA_09G134500		PF00168 - C2 domain (C2) (1 of 196)	0	47.218	19	5	18	5	281	30.3	5.03	66.52	5	0	0.748	0.977957	24.56	95.9	104.1	32.79	58.82	High	High	High	High	High	High	1		3	3	Present Both	1	GLYMA_09G134500	GLYMA_09G134500	sp|O04023|SRC2_ARATH	Protein SRC2 homolog GN=SRC2	ident:65/281 pos:99/281 query:281 hit:324 align:236 bit:46.2	Poor_match	Protein SRC2 homolog (AtSRC2)	na	SRC2_ARATH	O04023	O81814	SRC2	na	Arabidopsis thaliana (Mouse-ear cress)
High	Master Protein	GLYMA_01G132500		PF00234 - Protease inhibitor/seed storage/LTP family (Tryp_alpha_amyl) (1 of 30)	0	5.34	8	1	1	1	118	11.8	8.9	2.91	1	0	0.01	1.31e-16		200				High	Not Found	Not Found	Not Found	Not Found	Not Found	1		1	0	Missing Both	1	GLYMA_01G132500	GLYMA_01G132500	sp|Q9LLR6|NLTP4_ARATH	Non-specific lipid-transfer protein 4 GN=LTP4	ident:64/118 pos:74/118 query:118 hit:112 align:110 bit:114.0	OK	Non-specific lipid-transfer protein 4 (LTP 4)	na	NLTP4_ARATH	Q9LLR6	Q9FIE7	LTP4	na	Arabidopsis thaliana (Mouse-ear cress)
High	Master Protein	GLYMA_04G009400		PF00257 - Dehydrin (Dehydrin) (1 of 7)	0	16.972	14	2	10	2	214	24.2	5.77	14.91	2	0	0.375	0.205926	12.24	149.1	50.9	62.56	48.69	High	High	High	High	High	High	1		3	3	Present Both	1	GLYMA_04G009400	GLYMA_04G009400	sp|P31168|COR47_ARATH	Dehydrin COR47 GN=COR47	ident:99/214 pos:134/214 query:214 hit:265 align:232 bit:92.0	Poor_match	Dehydrin COR47	Cold-induced COR47 protein	COR47_ARATH	P31168	Q39059	COR47	RD17	Arabidopsis thaliana (Mouse-ear cress)
High	Master Protein	GLYMA_12G064300		PF00314 - Thaumatin family (Thaumatin) (1 of 61)	0	47.55	12	3	22	3	248	26.2	7.85	73.77	3	0	1.551	0.770898	66.82	100.4	99.6	57.15	38.7	High	High	High	High	High	High	1		3	3	Present Both	1	GLYMA_12G064300	GLYMA_12G064300	sp|P50699|TLPH_ARATH	Thaumatin-like protein GN=TIR	ident:101/248 pos:133/248 query:248 hit:243 align:225 bit:185.7	Poor_match	Thaumatin-like protein	na	TLPH_ARATH	P50699	Q9LM26	OrderedLocusNames=At1g18250	na	Arabidopsis thaliana (Mouse-ear cress)
High	Master Protein	GLYMA_07G243600		PF00407 - Pathogenesis-related protein Bet v I family (Bet_v_1) (1 of 39)	0	107.135	75	13	45	7	158	16.8	4.88	146.42	13	6	1.221	0.972417	106.96	60	140	106.63	31.67	High	High	High	High	High	High	1		3	3	Present Both	1	GLYMA_07G243600	GLYMA_07G243600	sp|Q93VR4|ML423_ARATH	MLP-like protein 423 GN=MLP423	ident:46/158 pos:76/158 query:158 hit:155 align:155 bit:45.8	Poor_match	MLP-like protein 423	na	ML423_ARATH	Q93VR4	Q8L9L8; Q9LR93	MLP423	na	Arabidopsis thaliana (Mouse-ear cress)
High	Master Protein	GLYMA_08G230100		PF00407 - Pathogenesis-related protein Bet v I family (Bet_v_1) (1 of 39)	0	32.983	26	3	16	2	152	17.6	5.68	54.38	3	0	0.879	0.996833	28.59	124.4	75.6	27.35	55.99	High	High	High	High	High	High	1		3	3	Present Both	1	GLYMA_08G230100	GLYMA_08G230100	sp|Q9SSK5|MLP43_ARATH	MLP-like protein 43 GN=MLP43	ident:63/152 pos:94/152 query:152 hit:158 align:151 bit:119.4	Poor_match	MLP-like protein 43	na	MLP43_ARATH	Q9SSK5	na	MLP43	na	Arabidopsis thaliana (Mouse-ear cress)
High	Master Protein	GLYMA_08G230500		PF00407 - Pathogenesis-related protein Bet v I family (Bet_v_1) (1 of 39)	0	98.365	64	8	49	4	153	17.8	6.46	155.63	8	0	1.027	0.996833	75.92	111.9	88.1	39	75.8	High	High	High	High	High	High	1		3	3	Present Both	1	GLYMA_08G230500	GLYMA_08G230500	sp|Q9SSK5|MLP43_ARATH	MLP-like protein 43 GN=MLP43	ident:57/153 pos:90/153 query:153 hit:158 align:151 bit:112.5	Poor_match	MLP-like protein 43	na	MLP43_ARATH	Q9SSK5	na	MLP43	na	Arabidopsis thaliana (Mouse-ear cress)
High	Master Protein	GLYMA_15G218900		PF00407 - Pathogenesis-related protein Bet v I family (Bet_v_1) (1 of 39)	0	97.659	68	9	48	5	152	17.6	6.74	149.42	9	4	1.777	0.591418	72.72	99.8	100.2	31.89	50.61	High	High	High	High	High	High	1		3	3	Present Both	1	GLYMA_15G218900	GLYMA_15G218900	sp|Q9SSK5|MLP43_ARATH	MLP-like protein 43 GN=MLP43	ident:58/152 pos:92/152 query:152 hit:158 align:151 bit:112.1	Poor_match	MLP-like protein 43	na	MLP43_ARATH	Q9SSK5	na	MLP43	na	Arabidopsis thaliana (Mouse-ear cress)
High	Master Protein	GLYMA_17G030200		PF00407 - Pathogenesis-related protein Bet v I family (Bet_v_1) (1 of 39)	0	149.199	75	13	88	11	158	16.7	5.05	308.32	13	0	1.741	0.624571	77.55	66.7	133.3	88.59	8.83	High	High	High	High	High	High	1		3	3	Present Both	1	GLYMA_17G030200	GLYMA_17G030200	sp|Q93VR4|ML423_ARATH	MLP-like protein 423 GN=MLP423	ident:47/158 pos:78/158 query:158 hit:155 align:156 bit:47.0	Poor_match	MLP-like protein 423	na	ML423_ARATH	Q93VR4	Q8L9L8; Q9LR93	MLP423	na	Arabidopsis thaliana (Mouse-ear cress)
High	Master Protein	GLYMA_04G095900		PF00515 - Tetratricopeptide repeat (TPR_1) (1 of 67)	0	48.261	38	7	20	5	221	24.1	8.7	68.94	7	0	0.808	0.996833	45.28	169.9	30.1	46.51	139.49	High	High	High	Peak Found	High	High	1		3	3	Present Both	1	GLYMA_04G095900	GLYMA_04G095900	sp|B9DHG0|PYG7_ARATH	Tetratricopeptide repeat domain-containing protein PYG7, chloroplastic GN=PYG7	ident:21/221 pos:31/221 query:221 hit:301 align:59 bit:39.7	Partial_match_both	Tetratricopeptide repeat domain-containing protein PYG7, chloroplastic	Protein PALE YELLOW GREEN 7	PYG7_ARATH	B9DHG0	O80551; Q8LFF4; Q94EJ1	PYG7	na	Arabidopsis thaliana (Mouse-ear cress)
High	Master Protein	GLYMA_06G097600		PF00515 - Tetratricopeptide repeat (TPR_1) (1 of 67)	0	98.881	46	12	45	10	222	24.2	9.09	181.65	12	2	0.811	0.996833	41.43	89.1	110.9	22.57	35.02	High	High	High	High	High	High	1	Phospho [S172]	3	3	Present Both	1	GLYMA_06G097600	GLYMA_06G097600	sp|B9DHG0|PYG7_ARATH	Tetratricopeptide repeat domain-containing protein PYG7, chloroplastic GN=PYG7	ident:20/222 pos:28/222 query:222 hit:301 align:56 bit:35.4	Partial_match_both	Tetratricopeptide repeat domain-containing protein PYG7, chloroplastic	Protein PALE YELLOW GREEN 7	PYG7_ARATH	B9DHG0	O80551; Q8LFF4; Q94EJ1	PYG7	na	Arabidopsis thaliana (Mouse-ear cress)
High	Master Protein	GLYMA_01G211200		PF00515//PF13181//PF13414 - Tetratricopeptide repeat (TPR_1) // Tetratricopeptide repeat (TPR_8) // TPR repeat (TPR_11) (1 of 1)	0	89.497	32	15	37	6	585	65.6	6.46	95.97	15	8	0.856	0.996833	49.24	118.1	81.9	22.43	11.5	High	High	Peak Found	Peak Found	High	High	1		3	3	Present Both	1	GLYMA_01G211200	GLYMA_01G211200	sp|Q9STH1|HSOP3_ARATH	Hsp70-Hsp90 organizing protein 3 GN=HOP3	ident:425/585 pos:498/585 query:585 hit:558 align:586 bit:884.8	OK	Hsp70-Hsp90 organizing protein 3 (AtHop3)	na	HSOP3_ARATH	Q9STH1	B9DG66; F4JQM6; Q8L724	HOP3	na	Arabidopsis thaliana (Mouse-ear cress)
High	Master Protein	GLYMA_04G107900		PF00582 - Universal stress protein family (Usp) (1 of 74)	0	23.448	37	4	15	3	167	18.7	5.96	32.24	4	0	0.579	0.757885	12.72	135.3	64.7	51.63	52.48	High	High	High	High	High	High	1		3	3	Present Both	1	GLYMA_04G107900	GLYMA_04G107900	sp|Q8LGG8|USPAL_ARATH	Universal stress protein A-like protein GN=URH2	ident:42/167 pos:79/167 query:167 hit:175 align:158 bit:62.0	Poor_match	Universal stress protein A-like protein	na	USPAL_ARATH	Q8LGG8	Q940U0; Q9SSA2	OrderedLocusNames=At3g01520	na	Arabidopsis thaliana (Mouse-ear cress)
High	Master Protein	GLYMA_11G134900		PF00582 - Universal stress protein family (Usp) (1 of 74)	0	101.103	37	7	47	4	164	17.7	6	181.37	7	5	0.772	0.996833	21.68	120.8	79.2	18.65	29.55	High	High	High	High	High	High	1		3	3	Present Both	1	GLYMA_11G134900	GLYMA_11G134900	sp|Q8VYN9|PHO32_ARATH	Universal stress protein PHOS32 GN=PHOS32	ident:47/164 pos:78/164 query:164 hit:242 align:150 bit:64.3	Poor_match	Universal stress protein PHOS32	Phosphorylated protein of 32 kDa (AtPHOS32)	PHO32_ARATH	Q8VYN9	Q9LSR2	PHOS32	na	Arabidopsis thaliana (Mouse-ear cress)
High	Master Protein	GLYMA_12G058500		PF00582 - Universal stress protein family (Usp) (1 of 74)	0	104.267	50	7	49	4	164	17.9	5.91	174.56	7	0	0.599	0.806821	22.09	142.2	57.8	62.88	47.64	High	High	High	High	High	High	1		3	3	Present Both	1	GLYMA_12G058500	GLYMA_12G058500	sp|Q8VYN9|PHO32_ARATH	Universal stress protein PHOS32 GN=PHOS32	ident:46/164 pos:80/164 query:164 hit:242 align:153 bit:62.4	Poor_match	Universal stress protein PHOS32	Phosphorylated protein of 32 kDa (AtPHOS32)	PHO32_ARATH	Q8VYN9	Q9LSR2	PHOS32	na	Arabidopsis thaliana (Mouse-ear cress)
High	Master Protein	GLYMA_18G190700		PF00582 - Universal stress protein family (Usp) (1 of 74)	0	7.726	14	2	5	2	157	17.4	6.8	9.45	2	0	4.153	0.00735735	58.43	133.9	66.1	52.95	132.39	High	High	Peak Found	High	Peak Found	High	1		3	3	Present Both	1	GLYMA_18G190700	GLYMA_18G190700	sp|Q8VYN9|PHO32_ARATH	Universal stress protein PHOS32 GN=PHOS32	ident:46/157 pos:76/157 query:157 hit:242 align:151 bit:62.4	Poor_match	Universal stress protein PHOS32	Phosphorylated protein of 32 kDa (AtPHOS32)	PHO32_ARATH	Q8VYN9	Q9LSR2	PHOS32	na	Arabidopsis thaliana (Mouse-ear cress)
High	Master Protein	GLYMA_11G030700		PF00805 - Pentapeptide repeats (8 copies) (Pentapeptide) (1 of 6)	0	5.306	5	1	2	1	266	28.3	7.39	3.24	1	0	0.573	0.75101	0.45	127.2	72.8		1.31	High	Not Found	Not Found	Not Found	Peak Found	High	1		1	2	Only Sample	1	GLYMA_11G030700	GLYMA_11G030700	sp|Q8H1Q1|TL203_ARATH	Thylakoid lumenal protein TL20.3, chloroplastic GN=TL20.3	ident:197/266 pos:228/266 query:266 hit:280 align:280 bit:362.5	OK	Thylakoid lumenal protein TL20.3, chloroplastic	na	TL203_ARATH	Q8H1Q1	Q94C72; Q9FWX1	TL20.3	na	Arabidopsis thaliana (Mouse-ear cress)
High	Master Protein	GLYMA_U043500		PF02178 - AT hook motif (AT_hook) (1 of 2)	0	13.763	12	1	9	1	240	25.7	10.17	32.09	1	0	1.259	0.970114	57.09	85	115	28.19	49.75	High	High	High	High	High	High	1		3	3	Present Both	1	GLYMA_U043500	GLYMA_U043500	sp|P26569|H12_ARATH	Histone H1.2 GN=GPT2	ident:34/240 pos:44/240 query:240 hit:273 align:71 bit:60.5	Partial_match_both	Histone H1.2	na	H12_ARATH	P26569	na	OrderedLocusNames=At2g30620	na	Arabidopsis thaliana (Mouse-ear cress)
High	Master Protein	GLYMA_11G187900		PF02238 - Cytochrome c oxidase subunit VIIa (COX7a) (1 of 3)	0	160.51	78	8	131	8	67	7.6	9.92	505.18	8	0	1.036	0.996833	70.15	96.1	103.9	46.05	21.69	High	High	High	High	High	High	1		3	3	Present Both	1	GLYMA_11G187900	GLYMA_11G187900	sp|Q9C994|DTX14_ARATH	Protein DETOXIFICATION 14 GN=DTX14	ident:13/67 pos:23/67 query:67 hit:485 align:45 bit:26.6	Partial_match_hit	Protein DETOXIFICATION 14 (AtDTX14)	Multidrug and toxic compound extrusion protein 14 (MATE protein 14)	DTX14_ARATH	Q9C994	na	DTX14	na	Arabidopsis thaliana (Mouse-ear cress)
High	Master Protein	GLYMA_03G109900		PF02298 - Plastocyanin-like domain (Cu_bind_like) (1 of 91)	0	60.927	15	5	48	5	187	19.2	5.36	149.23	5	0	0.722	0.970114	30.82	91.3	108.7	42.29	41.2	High	High	High	High	High	High	1		3	3	Present Both	1	GLYMA_03G109900	GLYMA_03G109900	sp|O82081|UCC1_ARATH	Uclacyanin 1 GN=UCC1	ident:58/187 pos:80/187 query:187 hit:261 align:125 bit:122.5	Partial_match_hit	Uclacyanin 1	na	UCC1_ARATH	O82081	Q0WPC5	UCC1	na	Arabidopsis thaliana (Mouse-ear cress)
High	Master Protein	GLYMA_12G134800		PF02298 - Plastocyanin-like domain (Cu_bind_like) (1 of 91)	0	14.722	19	2	7	2	213	22.8	6.92	25.17	2	0	0.346	0.144201	2.98	148.5	51.5	45.61	9.23	High	High	High	Peak Found	High	High	1		3	3	Present Both	1	GLYMA_12G134800	GLYMA_12G134800	sp|Q9SK27|ENL1_ARATH	Early nodulin-like protein 1 GN=GSH1	ident:59/213 pos:92/213 query:213 hit:182 align:144 bit:117.9	Poor_match	Early nodulin-like protein 1	Phytocyanin-like protein	ENL1_ARATH	Q9SK27	Q680Y2	OrderedLocusNames=At2g25060	na	Arabidopsis thaliana (Mouse-ear cress)
High	Master Protein	GLYMA_16G166600		PF02496 - ABA/WDS induced protein (ABA_WDS) (1 of 3)	0	48.519	59	3	9	3	111	12.6	6.86	43.73	3	0	0.242	0.016556	6.84	174.9	25.1	63.4	10.27	High	High	High	High	Not Found	High	1		3	2	Present Both	1	GLYMA_16G166600	GLYMA_16G166600	sp|Q15KI9|PHYLO_ARATH	Protein PHYLLO, chloroplastic GN=PHYLLO	ident:12/111 pos:16/111 query:111 hit:1715 align:30 bit:28.1	Partial_match_both	2-succinyl-6-hydroxy-2,4-cyclohexadiene-1-carboxylate synthase	MENF; MEND; MENC; MENH	PHYLO_ARATH	Q15KI9	Q0WV21; Q15KJ0; Q9CAB1; Q9CAB2	PHYLLO	na	Arabidopsis thaliana (Mouse-ear cress)
High	Master Protein	GLYMA_13G327800		PF03094//PF03911 - Mlo family (Mlo) // Sec61beta family (Sec61_beta) (1 of 2)	0	50.684	12	5	30	4	539	61.3	10.45	103.61	5	1	1.014	0.996833	61.74	52.4	147.6	109.91	20.75	High	High	High	High	High	High	1		3	3	Present Both	1	GLYMA_13G327800	GLYMA_13G327800	sp|Q94KB7|MLO6_ARATH	MLO-like protein 6 GN=MLO6	ident:281/539 pos:337/539 query:539 hit:583 align:447 bit:583.2	OK	MLO-like protein 6 (AtMlo6)	na	MLO6_ARATH	Q94KB7	Q9SY94	MLO6	na	Arabidopsis thaliana (Mouse-ear cress)
High	Master Protein	GLYMA_14G037300		PF03168 - Late embryogenesis abundant protein (LEA_2) (1 of 105)	0	67.921	24	5	26	5	320	35.6	4.98	99.57	5	0	0.396	0.257518	14.45	158.8	41.2	72	53.95	High	High	High	High	High	High	1		3	3	Present Both	1	GLYMA_14G037300	GLYMA_14G037300	sp|O82355|LEA2R_ARATH	Desiccation-related protein At2g46140 GN=LEA29	ident:47/320 pos:75/320 query:320 hit:166 align:166 bit:71.6	Poor_match	Desiccation-related protein At2g46140	LEA type-2 family protein At2g46140	LEA2R_ARATH	O82355	Q8LC67	OrderedLocusNames=At2g46140	na	Arabidopsis thaliana (Mouse-ear cress)
High	Master Protein	GLYMA_03G013400		PF03766 - Remorin, N-terminal region (Remorin_N) (1 of 8)	0	166.201	68	15	125	6	200	22	6.83	380.92	15	0	1.353	0.932333	49.99	77.2	122.8	41.79	16.12	High	High	High	High	High	High	1		3	3	Present Both	1	GLYMA_03G013400	GLYMA_03G013400	sp|Q9M2D8|Y3126_ARATH	Uncharacterized protein At3g61260 GN=CBSDUF4	ident:102/200 pos:124/200 query:200 hit:212 align:161 bit:193.7	Poor_match	Uncharacterized protein At3g61260	na	Y3126_ARATH	Q9M2D8	na	OrderedLocusNames=At3g61260	na	Arabidopsis thaliana (Mouse-ear cress)
High	Master Protein	GLYMA_07G073100		PF03766 - Remorin, N-terminal region (Remorin_N) (1 of 8)	0	260.882	78	23	181	12	198	21.6	8.43	593.38	23	11	1.014	0.996833	69.8	80.7	119.3	54.47	28.21	High	High	High	High	High	High	1		3	3	Present Both	1	GLYMA_07G073100	GLYMA_07G073100	sp|Q9M2D8|Y3126_ARATH	Uncharacterized protein At3g61260 GN=CBSDUF4	ident:104/198 pos:128/198 query:198 hit:212 align:159 bit:198.7	OK	Uncharacterized protein At3g61260	na	Y3126_ARATH	Q9M2D8	na	OrderedLocusNames=At3g61260	na	Arabidopsis thaliana (Mouse-ear cress)
High	Master Protein	GLYMA_18G230500		PF03766 - Remorin, N-terminal region (Remorin_N) (1 of 8)	0	74.537	54	12	40	10	183	20.1	8.7	129	12	0	1.607	0.739503	42.92	67.6	132.4	43.59	22.63	High	High	High	High	High	High	1		3	3	Present Both	1	GLYMA_18G230500	GLYMA_18G230500	sp|Q9M2D8|Y3126_ARATH	Uncharacterized protein At3g61260 GN=CBSDUF4	ident:96/183 pos:123/183 query:183 hit:212 align:149 bit:195.7	OK	Uncharacterized protein At3g61260	na	Y3126_ARATH	Q9M2D8	na	OrderedLocusNames=At3g61260	na	Arabidopsis thaliana (Mouse-ear cress)
High	Master Protein	GLYMA_08G330400		PF05627 - Cleavage site for pathogenic type III effector avirulence factor Avr (AvrRpt-cleavage) (1 of 25)	0	48.7	51	3	15	1	79	8.6	7.97	64.49	3	2	1.493	0.820214	66.33	93.4	106.6	35.32	68.88	High	High	High	High	High	High	1		3	3	Present Both	1	GLYMA_08G330400	GLYMA_08G330400	sp|O22633|NOI4_ARATH	Protein NOI4 GN=NOI4	ident:56/79 pos:62/79 query:79 hit:79 align:79 bit:114.8	OK	Protein NOI4	Protein DiDi 18T-1d	NOI4_ARATH	O22633	F4K693; F4K694; Q9M3R9	NOI4	na	Arabidopsis thaliana (Mouse-ear cress)
High	Master Protein	GLYMA_18G075900		PF05627 - Cleavage site for pathogenic type III effector avirulence factor Avr (AvrRpt-cleavage) (1 of 25)	0	47.903	51	3	14	1	79	8.6	7.97	68.04	3	0	0.887	0.996833	33.25	106	94	11.4	37.95	High	High	High	High	High	High	1		3	3	Present Both	1	GLYMA_18G075900	GLYMA_18G075900	sp|O22633|NOI4_ARATH	Protein NOI4 GN=NOI4	ident:55/79 pos:61/79 query:79 hit:79 align:79 bit:113.2	OK	Protein NOI4	Protein DiDi 18T-1d	NOI4_ARATH	O22633	F4K693; F4K694; Q9M3R9	NOI4	na	Arabidopsis thaliana (Mouse-ear cress)
High	Master Protein	GLYMA_09G222500		PF05680 - ATP synthase E chain (ATP-synt_E) (1 of 2)	0	14.426	62	2	12	1	53	5.7	10.17	38.87	2	0	1.295	0.946051	61.58	87.1	112.9	52.38	21.49	High	High	High	High	High	High	1		3	3	Present Both	1	GLYMA_09G222500	GLYMA_09G222500	sp|Q58P71|CHX8_ARATH	Cation/H(+) antiporter 8 GN=CHX8	ident:12/53 pos:18/53 query:53 hit:816 align:28 bit:25.0	Partial_match_hit	Cation/H(+) antiporter 8	Protein CATION/H+ EXCHANGER 8 (AtCHX8)	CHX8_ARATH	Q58P71	F4IHR1; Q9ZUW0	CHX8	CHX08	Arabidopsis thaliana (Mouse-ear cress)
High	Master Protein	GLYMA_12G036000		PF05680 - ATP synthase E chain (ATP-synt_E) (1 of 2)	0	14.356	62	2	10	1	53	5.6	10.17	31.43	2	0	1.115	0.996833	39.9	103	97	46.94	47.01	High	High	High	High	High	High	1		3	3	Present Both	1	GLYMA_12G036000	GLYMA_12G036000	sp|Q58P71|CHX8_ARATH	Cation/H(+) antiporter 8 GN=CHX8	ident:12/53 pos:18/53 query:53 hit:816 align:28 bit:25.0	Partial_match_hit	Cation/H(+) antiporter 8	Protein CATION/H+ EXCHANGER 8 (AtCHX8)	CHX8_ARATH	Q58P71	F4IHR1; Q9ZUW0	CHX8	CHX08	Arabidopsis thaliana (Mouse-ear cress)
High	Master Protein	GLYMA_15G008800		PF06232 - Embryo-specific protein 3, (ATS3) (ATS3) (1 of 9)	0	30.284	24	3	9	3	170	19.3	4.93	30.57	3	0	1.605	0.740517	53.96	84	116	36.08	70.66	High	High	High	High	High	High	1		3	3	Present Both	1	GLYMA_15G008800	GLYMA_15G008800	sp|Q6NPM5|ATS3B_ARATH	Embryo-specific protein ATS3B GN=ATS3B	ident:87/170 pos:109/170 query:170 hit:190 align:169 bit:174.9	Poor_match	Embryo-specific protein ATS3B	Protein ARABIDOPSIS THALIANA SEED 3B	ATS3B_ARATH	Q6NPM5	Q680D1; Q9LVB6	ATS3B	na	Arabidopsis thaliana (Mouse-ear cress)
High	Master Protein	GLYMA_04G178100		PF06522 - NADH-ubiquinone reductase complex 1 MLRQ subunit (B12D) (1 of 6)	0	95.95	46	7	35	1	89	10.1	9.35	134.2	7	0	0.824	0.996833	24.57	109.6	90.4	38.3	15.5	High	High	High	High	High	High	1		3	3	Present Both	1	GLYMA_04G178100	GLYMA_04G178100	sp|Q9MA15|AB1K3_ARATH	Protein ACTIVITY OF BC1 COMPLEX KINASE 3, chloroplastic GN=ABC1K3	ident:17/89 pos:24/89 query:89 hit:711 align:53 bit:25.4	Partial_match_hit	Protein ACTIVITY OF BC1 COMPLEX KINASE 3, chloroplastic (ABC1-LIKE KINASE 3)	Protein REPRESSOR OF BDR1	AB1K3_ARATH	Q9MA15	Q94BV0	ABC1K3	na	Arabidopsis thaliana (Mouse-ear cress)
High	Master Protein	GLYMA_06G186900		PF06522 - NADH-ubiquinone reductase complex 1 MLRQ subunit (B12D) (1 of 6)	0	109.303	49	8	34	2	84	9.5	8.02	122.22	8	6	1.082	0.996833	56.12	133.6	66.4	55.62	10.46	High	High	High	High	High	High	1		3	3	Present Both	1	GLYMA_06G186900	GLYMA_06G186900	sp|Q9LZP3|PP293_ARATH	Pentatricopeptide repeat-containing protein At3g62470, mitochondrial GN=PCMP-H80	ident:14/84 pos:21/84 query:84 hit:599 align:43 bit:28.1	Partial_match_hit	Pentatricopeptide repeat-containing protein At3g62470, mitochondrial	na	PP293_ARATH	Q9LZP3	na	OrderedLocusNames=At3g62470	na	Arabidopsis thaliana (Mouse-ear cress)
High	Master Protein	GLYMA_16G221400		PF06697 - Protein of unknown function (DUF1191) (DUF1191) (1 of 14)	0	8.152	6	2	7	1	376	40.6	9.57	23.43	2	0	0.447	0.41192	4.49	138.2	61.8	35.21	10.86	High	High	High	High	High	High	1		3	3	Present Both	1	GLYMA_16G221400	GLYMA_16G221400	sp|P43298|TMK1_ARATH	Receptor protein kinase TMK1 GN=TMK1	ident:19/376 pos:25/376 query:376 hit:942 align:37 bit:38.1	Partial_match_both	Receptor protein kinase TMK1	BARK1-like kinase 1; Transmembrane kinase 1	TMK1_ARATH	P43298	C0LGH9; Q84R13	TMK1	na	Arabidopsis thaliana (Mouse-ear cress)
High	Master Protein	GLYMA_05G239100		PF07058 - Microtubule-associated protein 70 (MAP70) (1 of 10)	0	12.448	8	4	10	4	616	68.6	8.68	16.98	4	0	1.135	0.996833	76.63	75.4	124.6	62.09	63.2	High	High	High	High	High	High	1		3	3	Present Both	1	GLYMA_05G239100	GLYMA_05G239100	sp|Q8L7S4|MP702_ARATH	Microtubule-associated protein 70-2 GN=MAP70.2	ident:480/616 pos:549/616 query:616 hit:634 align:637 bit:922.5	OK	Microtubule-associated protein 70-2 (AtMAP70-2)	70 kDa microtubule-associated protein 2	MP702_ARATH	Q8L7S4	Q3MQ34; Q9FXK0	MAP70.2	na	Arabidopsis thaliana (Mouse-ear cress)
High	Master Protein	GLYMA_13G266100		PF07714//PF11721//PF13855 - Protein tyrosine kinase (Pkinase_Tyr) // Di-glucose binding within endoplasmic reticulum (Malectin) // Leucine rich repeat (LRR_8) (1 of 10)	0	50.327	7	7	16	6	999	110	5.71	52.12	7	1	0.526	0.638435	17.91	163.5	36.5	29.94	66.07	High	High	High	Peak Found	Peak Found	High	1		3	3	Present Both	1	GLYMA_13G266100	GLYMA_13G266100	sp|C0LGN2|Y3148_ARATH	Probable leucine-rich repeat receptor-like serine/threonine-protein kinase At3g14840 GN=LRR-RLK	ident:586/999 pos:744/999 query:999 hit:1020 align:1020 bit:1169.8	OK	Probable leucine-rich repeat receptor-like serine/threonine-protein kinase At3g14840	na	Y3148_ARATH	C0LGN2	Q94EW5; Q9LH71	LRR-RLK	na	Arabidopsis thaliana (Mouse-ear cress)
High	Master Protein	GLYMA_07G038600		PF07883 - Cupin domain (Cupin_2) (1 of 61)	0	35.714	19	2	9	2	208	21.6	9.06	36.45	2	0	0.523	0.632252	12.27	139.3	60.7	66.37	19.38	High	High	High	High	High	High	1		3	3	Present Both	1	GLYMA_07G038600	GLYMA_07G038600	sp|P94072|GL33_ARATH	Germin-like protein subfamily 3 member 3 GN=GER3	ident:127/208 pos:154/208 query:208 hit:211 align:209 bit:245.7	OK	Germin-like protein subfamily 3 member 3 (AtGER3; AtGLP2)	na	GL33_ARATH	P94072	P94028	GER3	GLP2A; GLP2B; GLP3; GLP3A; GLP3B	Arabidopsis thaliana (Mouse-ear cress)
Medium	Master Protein	GLYMA_11G109500		PF07899 - Frigida-like protein (Frigida) (1 of 17)	0.028	1.129	1	1	1	1	960	110.7	8.27	0	1	0	1.447	0.85723	27.51	77.4	122.6	57.08	10.78	High	Peak Found	Peak Found	Peak Found	Peak Found	Peak Found	1		3	3	Present Both	1	GLYMA_11G109500	GLYMA_11G109500	sp|Q67ZB3|FRL3_ARATH	FRIGIDA-like protein 3 GN=FRL3	ident:77/960 pos:132/960 query:960 hit:558 align:257 bit:92.0	Partial_match_both	FRIGIDA-like protein 3	na	FRL3_ARATH	Q67ZB3	Q8L7D6; Q9LV73	FRL3	na	Arabidopsis thaliana (Mouse-ear cress)
High	Master Protein	GLYMA_08G348200		PF08186 - Wound-inducible basic protein family (Wound_ind) (1 of 2)	0	22.563	35	2	22	2	60	6.8	9.2	61.72	2	0	0.482	0.513437	25.52	144	56	57.04	41.44	High	High	High	High	High	High	1		3	3	Present Both	1	GLYMA_08G348200	GLYMA_08G348200	sp|Q9FG93|MNS4_ARATH	Alpha-mannosidase I MNS4 GN=MNS4	ident:16/60 pos:27/60 query:60 hit:624 align:53 bit:25.4	Partial_match_hit	Alpha-mannosidase I MNS4	na	MNS4_ARATH	Q9FG93	na	MNS4	na	Arabidopsis thaliana (Mouse-ear cress)
High	Master Protein	GLYMA_07G215900		PF08263 - Leucine rich repeat N-terminal domain (LRRNT_2) (1 of 565)	0	37.455	19	6	12	6	449	49.8	8.79	27.04	6	0	0.841	0.996833	22.42	136.1	63.9	57.32	62.62	High	High	High	High	High	High	1		3	3	Present Both	1	GLYMA_07G215900	GLYMA_07G215900	sp|Q8W3M4|Y4744_ARATH	Uncharacterized protein At4g06744 GN=ARF46	ident:147/449 pos:213/449 query:449 hit:404 align:351 bit:264.2	Poor_match	Uncharacterized protein At4g06744	na	Y4744_ARATH	Q8W3M4	na	OrderedLocusNames=At4g06744	na	Arabidopsis thaliana (Mouse-ear cress)
High	Master Protein	GLYMA_02G174400		PF10183 - ESSS subunit of NADH:ubiquinone oxidoreductase (complex I) (ESSS) (1 of 2)	0	10.907	28	2	2	2	128	14.1	7.34	7.03	2	0	0.01	1.31e-16		200				High	Peak Found	High	Peak Found	Peak Found	Peak Found	1		3	3	Present Both	1	GLYMA_02G174400	GLYMA_02G174400	sp|Q9M310|FBK77_ARATH	F-box/kelch-repeat protein At3g61590 GN=NSFBx	ident:14/128 pos:20/128 query:128 hit:411 align:37 bit:28.9	Partial_match_both	F-box/kelch-repeat protein At3g61590	na	FBK77_ARATH	Q9M310	na	OrderedLocusNames=At3g61590	na	Arabidopsis thaliana (Mouse-ear cress)
Medium	Master Protein	GLYMA_19G183500		PF10270 - Membrane magnesium transporter (MMgT) (1 of 4)	0.016	1.491	8	1	1	1	112	12.6	6.13	0	1	0	0.01	1.31e-16		200		27.81		High	Peak Found	Peak Found	Not Found	Not Found	Not Found	1		3	0	Only Control	1	GLYMA_19G183500	GLYMA_19G183500	sp|Q2HIM5|MMGT_ARATH	Membrane magnesium transporter GN=JMJ30	ident:71/112 pos:84/112 query:112 hit:104 align:109 bit:144.4	OK	Membrane magnesium transporter	ER membrane protein complex subunit 5 homolog	MMGT_ARATH	Q2HIM5	A8MRD2; Q8LD56	OrderedLocusNames=At5g03345	na	Arabidopsis thaliana (Mouse-ear cress)
High	Master Protein	GLYMA_15G116500		PF10785 - NADH-ubiquinone oxidoreductase complex I, 21 kDa subunit (NADH-u_ox-rdase) (1 of 2)	0	187.047	96	6	93	6	101	11	9.35	427.59	6	0	1.411	0.87034	58.02	86.9	113.1	0.97	20.66	High	High	High	High	High	High	1	Acetyl [N-Term]	3	3	Present Both	1	GLYMA_15G116500	GLYMA_15G116500	sp|Q9SCU0|SDR2A_ARATH	Short-chain dehydrogenase reductase 2a GN=SDR2a	ident:22/101 pos:37/101 query:101 hit:303 align:73 bit:28.1	Partial_match_hit	Short-chain dehydrogenase reductase 2a (AtSDR2a)	na	SDR2A_ARATH	Q9SCU0	na	SDR2a	SDR2	Arabidopsis thaliana (Mouse-ear cress)
High	Master Protein	GLYMA_14G206700		PF10890 - Protein of unknown function (DUF2741) (DUF2741) (1 of 2)	0	31.349	72	4	42	4	72	8.3	9.66	94.31	4	0	1.106	0.996833	43.08	89.4	110.6	7.13	3.43	High	High	High	High	High	High	1		3	3	Present Both	1	GLYMA_14G206700	GLYMA_14G206700	sp|Q1EBV7|BASS2_ARATH	Sodium/pyruvate cotransporter BASS2, chloroplastic GN=BASS2	ident:17/72 pos:29/72 query:72 hit:409 align:55 bit:29.3	Partial_match_hit	Sodium/pyruvate cotransporter BASS2, chloroplastic	Bile acid transporter 1; Bile acid-sodium symporter family protein 2	BASS2_ARATH	Q1EBV7	O81017; Q84WD8; Q8S2V7	BASS2	BAT1; SBF1	Arabidopsis thaliana (Mouse-ear cress)
High	Master Protein	GLYMA_01G064700		PF14111 - Domain of unknown function (DUF4283) (DUF4283) (1 of 148)	0.001	2.545	4	1	9	1	191	21.8	6.64	8.71	1	0	1.47	0.838508	28.22	78	122	48.86	12.47	High	High	High	High	High	High	1		3	3	Present Both	1	GLYMA_01G064700	GLYMA_01G064700	sp|O22960|TBL37_ARATH	Protein trichome birefringence-like 37 GN=TBL37	ident:21/191 pos:35/191 query:191 hit:385 align:77 bit:30.4	Partial_match_both	Protein trichome birefringence-like 37	na	TBL37_ARATH	O22960	na	TBL37	na	Arabidopsis thaliana (Mouse-ear cress)
High	Master Protein	GLYMA_19G109000		PF14200 - Ricin-type beta-trefoil lectin domain-like (RicinB_lectin_2) (1 of 3)	0	198.807	35	13	66	6	326	36.3	7.09	256.66	13	8	1.521	0.80004	79.57	84.6	115.4	9.55	49.24	High	High	High	High	High	High	1		3	3	Present Both	1	GLYMA_19G109000	GLYMA_19G109000	sp|Q945P1|EULS3_ARATH	Ricin B-like lectin EULS3 GN=EULS3	ident:156/326 pos:193/326 query:326 hit:317 align:317 bit:263.5	Poor_match	Ricin B-like lectin EULS3	Euonymus lectin S3 (AtEULS3)	EULS3_ARATH	Q945P1	Q9ZV03	EULS3	na	Arabidopsis thaliana (Mouse-ear cress)
High	Master Protein	GLYMA_02G000700		PF14576//PF14577 - Sieve element occlusion N-terminus (SEO_N) // Sieve element occlusion C-terminus (SEO_C) (1 of 21)	0	17.394	5	2	8	2	698	80	6.83	26.82	2	0	0.293	0.0577229	4.9	154.7	45.3	17.77	53.64	High	High	High	High	High	High	1		3	3	Present Both	1	GLYMA_02G000700	GLYMA_02G000700	sp|Q9SS87|SEOB_ARATH	Protein SIEVE ELEMENT OCCLUSION B GN=SEOB	ident:185/698 pos:327/698 query:698 hit:740 align:703 bit:241.1	Poor_match	Protein SIEVE ELEMENT OCCLUSION B (AtSEOb)	Protein SIEVE ELEMENT OCCLUSION-RELATED 1 (AtSEOR1)	SEOB_ARATH	Q9SS87	na	SEOB	na	Arabidopsis thaliana (Mouse-ear cress)
High	Master Protein	GLYMA_05G184800		PF15704 - Mitochondrial ATP synthase subunit (Mt_ATP_synt) (1 of 3)	0	424.94	75	31	242	4	241	27.5	6.44	816.15	31	31	1.11	0.996833	70.91	62.5	137.5	61.22	41.7	High	High	High	High	High	High	1		3	3	Present Both	1	GLYMA_05G184800	GLYMA_05G184800	sp|Q9SJ12|ATP7_ARATH	Probable ATP synthase 24 kDa subunit, mitochondrial GN=ATL77	ident:169/241 pos:205/241 query:241 hit:240 align:241 bit:342.4	OK	Probable ATP synthase 24 kDa subunit, mitochondrial	na	ATP7_ARATH	Q9SJ12	Q8LBN3	OrderedLocusNames=At2g21870	na	Arabidopsis thaliana (Mouse-ear cress)
High	Master Protein	GLYMA_11G099300		PF16320 - Ribosomal protein L7/L12 dimerisation domain (Ribosomal_L12_N) (1 of 2)	0	2.871	3	1	3	1	233	24.8	7.65	1.7	1	0	0.333	0.117407	12.43	109.4	90.6	86.83	50.68	High	Peak Found	Peak Found	High	High	Peak Found	1		3	3	Present Both	1	GLYMA_11G099300	GLYMA_11G099300	sp|P36210|RK121_ARATH	50S ribosomal protein L12-1, chloroplastic GN=RPL12A	ident:125/233 pos:151/233 query:233 hit:191 align:198 bit:193.7	OK	50S ribosomal protein L12-1, chloroplastic	CL12-A	RK121_ARATH	P36210	na	RPL12A	na	Arabidopsis thaliana (Mouse-ear cress)
High	Master Protein	GLYMA_02G233700		PF16940 - Chloroplast envelope transporter (Tic110) (1 of 4)	0	82.421	14	11	43	4	995	109.9	6.33	145.76	11	5	0.889	0.996833	51.19	125.7	74.3	38.76	18.61	High	High	High	High	High	High	1		3	3	Present Both	1	GLYMA_02G233700	GLYMA_02G233700	sp|Q8LPR9|TI110_ARATH	Protein TIC110, chloroplastic GN=TIC110	ident:689/995 pos:832/995 query:995 hit:1016 align:1004 bit:1379.8	OK	Protein TIC110, chloroplastic	Translocon at the inner envelope membrane of chloroplasts 110 (AtTIC110)	TI110_ARATH	Q8LPR9	Q0WMF8; Q8LPG5; Q9LMI9; Q9M9Z7	TIC110	na	Arabidopsis thaliana (Mouse-ear cress)
High	Master Protein	GLYMA_04G061900		PTHR10050 - DOLICHYL-PHOSPHATE-MANNOSE--PROTEIN MANNOSYLTRANSFERASE (1 of 2)	0	62.725	20	5	19	5	222	24.3	7.33	97.02	5	0	0.962	0.997696	40.82	79.8	120.2	39.24	54.57	High	High	High	High	High	High	1		3	3	Present Both	1	GLYMA_04G061900	GLYMA_04G061900	sp|Q93ZE8|SDF2_ARATH	Stromal cell-derived factor 2-like protein GN=SDF2	ident:177/222 pos:196/222 query:222 hit:218 align:221 bit:374.4	OK	Stromal cell-derived factor 2-like protein (AtSDF2; SDF2-like protein)	na	SDF2_ARATH	Q93ZE8	O81720; Q9SEZ5	SDF2	na	Arabidopsis thaliana (Mouse-ear cress)
High	Master Protein	GLYMA_12G040500		PTHR10121 - COATOMER SUBUNIT DELTA (1 of 5)	0	26.788	6	2	5	1	530	58.4	5.59	17.12	2	0	0.01	1.31e-16		200		18.38		High	High	Not Found	Not Found	Not Found	Not Found	1		2	0	Only Control	1	GLYMA_12G040500	GLYMA_12G040500	sp|Q93Y22|COPD_ARATH	Coatomer subunit delta GN=COP10	ident:392/530 pos:452/530 query:530 hit:527 align:533 bit:771.2	OK	Coatomer subunit delta	Delta-coat protein (Delta-COP)	COPD_ARATH	Q93Y22	Q56WY5; Q93Y42; Q9FF73	OrderedLocusNames=At5g05010	na	Arabidopsis thaliana (Mouse-ear cress)
High	Master Protein	GLYMA_20G111200		PTHR10121//PTHR10121:SF1 - COATOMER SUBUNIT DELTA // SUBFAMILY NOT NAMED (1 of 2)	0	46.999	12	5	11	4	530	58.4	5.83	35.25	5	1	1.385	0.897122	119.8	160.1	39.9	31.69	123.66	High	High	High	High	High	Peak Found	1		3	3	Present Both	1	GLYMA_20G111200	GLYMA_20G111200	sp|Q93Y22|COPD_ARATH	Coatomer subunit delta GN=COP10	ident:404/530 pos:458/530 query:530 hit:527 align:533 bit:795.0	OK	Coatomer subunit delta	Delta-coat protein (Delta-COP)	COPD_ARATH	Q93Y22	Q56WY5; Q93Y42; Q9FF73	OrderedLocusNames=At5g05010	na	Arabidopsis thaliana (Mouse-ear cress)
High	Master Protein	GLYMA_16G072400		PTHR10168//PTHR10168:SF104 - GLUTAREDOXIN // SUBFAMILY NOT NAMED (1 of 1)	0	46.673	59	5	10	5	107	11.3	6.52	30.66	5	0	0.637	0.864592	46.65	155.6	44.4	61.2	57.59	High	High	Peak Found	High	High	High	1		3	3	Present Both	1	GLYMA_16G072400	GLYMA_16G072400	sp|Q9FNE2|GRXC2_ARATH	Glutaredoxin-C2 GN=GRXC2	ident:77/107 pos:89/107 query:107 hit:111 align:107 bit:167.9	OK	Glutaredoxin-C2 (AtGrxC2)	na	GRXC2_ARATH	Q9FNE2	na	GRXC2	GRX370	Arabidopsis thaliana (Mouse-ear cress)
High	Master Protein	GLYMA_13G065000		PTHR10264//PTHR10264:SF93 - BAND 7 PROTEIN-RELATED // SUBFAMILY NOT NAMED (1 of 7)	0	435.328	52	25	199	10	286	31.5	5.24	701.27	25	17	0.531	0.655795	21.55	127.6	72.4	12.78	42.11	High	High	High	High	High	High	1		3	3	Present Both	1	GLYMA_13G065000	GLYMA_13G065000	sp|Q9FM19|HIR1_ARATH	Hypersensitive-induced response protein 1 GN=HIR1	ident:242/286 pos:263/286 query:286 hit:286 align:284 bit:505.0	OK	Hypersensitive-induced response protein 1 (AtHIR1)	na	HIR1_ARATH	Q9FM19	na	HIR1	na	Arabidopsis thaliana (Mouse-ear cress)
High	Master Protein	GLYMA_19G020000		PTHR10264//PTHR10264:SF93 - BAND 7 PROTEIN-RELATED // SUBFAMILY NOT NAMED (1 of 7)	0	417.764	52	25	204	10	286	31.5	5.24	767.34	25	0	0.653	0.895288	28.22	144.2	55.8	27.03	54.15	High	High	High	High	High	High	1		3	3	Present Both	1	GLYMA_19G020000	GLYMA_19G020000	sp|Q9FM19|HIR1_ARATH	Hypersensitive-induced response protein 1 GN=HIR1	ident:242/286 pos:265/286 query:286 hit:286 align:284 bit:506.1	OK	Hypersensitive-induced response protein 1 (AtHIR1)	na	HIR1_ARATH	Q9FM19	na	HIR1	na	Arabidopsis thaliana (Mouse-ear cress)
High	Master Protein	GLYMA_04G226400		PTHR10264:SF27 - STOMATIN-LIKE PROTEIN 2, MITOCHONDRIAL (1 of 2)	0	165.605	44	16	103	4	404	43.9	9.11	312.57	16	0	1.04	0.996833	42.94	98.7	101.3	35.32	17.6	High	High	High	High	High	High	1		3	3	Present Both	1	GLYMA_04G226400	GLYMA_04G226400	sp|Q9SRH6|HIR3_ARATH	Hypersensitive-induced response protein 3 GN=HIR3	ident:54/404 pos:100/404 query:404 hit:285 align:193 bit:73.2	Partial_match_query	Hypersensitive-induced response protein 3 (AtHIR3)	na	HIR3_ARATH	Q9SRH6	na	HIR3	P31	Arabidopsis thaliana (Mouse-ear cress)
High	Master Protein	GLYMA_09G154400		PTHR10264:SF69 - HYPERSENSITIVE-INDUCED RESPONSE PROTEIN 4 (1 of 2)	0	91.948	32	8	29	8	292	32.6	5.22	86.7	8	0	1.061	0.996833	80.18	94	106	7.85	19.17	High	High	High	High	High	High	1		3	3	Present Both	1	GLYMA_09G154400	GLYMA_09G154400	sp|Q9FHM7|HIR4_ARATH	Hypersensitive-induced response protein 4 GN=HIR4	ident:244/292 pos:269/292 query:292 hit:292 align:290 bit:516.2	OK	Hypersensitive-induced response protein 4 (AtHIR4)	na	HIR4_ARATH	Q9FHM7	na	HIR4	na	Arabidopsis thaliana (Mouse-ear cress)
High	Master Protein	GLYMA_05G029800		PTHR10264:SF92 - HYPERSENSITIVE-INDUCED RESPONSE PROTEIN 1 (1 of 4)	0	223.384	45	19	101	7	284	31.3	7.01	304.39	19	2	0.514	0.607241	21.15	148.7	51.3	25.24	71.24	High	High	High	High	High	High	1		3	3	Present Both	1	GLYMA_05G029800	GLYMA_05G029800	sp|Q9FM19|HIR1_ARATH	Hypersensitive-induced response protein 1 GN=HIR1	ident:248/284 pos:270/284 query:284 hit:286 align:282 bit:519.6	OK	Hypersensitive-induced response protein 1 (AtHIR1)	na	HIR1_ARATH	Q9FM19	na	HIR1	na	Arabidopsis thaliana (Mouse-ear cress)
High	Master Protein	GLYMA_17G097000		PTHR10264:SF92 - HYPERSENSITIVE-INDUCED RESPONSE PROTEIN 1 (1 of 4)	0	161.114	41	16	85	6	284	31.4	6.42	232.06	16	0	0.531	0.655795	16.4	126.6	73.4	57.34	28.71	High	High	High	High	High	High	1		3	3	Present Both	1	GLYMA_17G097000	GLYMA_17G097000	sp|Q9FM19|HIR1_ARATH	Hypersensitive-induced response protein 1 GN=HIR1	ident:253/284 pos:270/284 query:284 hit:286 align:282 bit:528.1	OK	Hypersensitive-induced response protein 1 (AtHIR1)	na	HIR1_ARATH	Q9FM19	na	HIR1	na	Arabidopsis thaliana (Mouse-ear cress)
High	Master Protein	GLYMA_20G245300		PTHR10277//PTHR10277:SF42 - HOMOCITRATE SYNTHASE-RELATED // SUBFAMILY NOT NAMED (1 of 3)	0	45.734	16	5	17	5	632	68.7	6.8	54.25	5	0	0.765	0.996833	33.07	109	91	33.46	17.84	High	High	High	High	High	High	1		3	3	Present Both	1	GLYMA_20G245300	GLYMA_20G245300	sp|Q9C550|LEU12_ARATH	2-isopropylmalate synthase 2, chloroplastic GN=IPMS2	ident:467/632 pos:529/632 query:632 hit:631 align:591 bit:966.8	OK	2-isopropylmalate synthase 2, chloroplastic	2-isopropylmalate synthase 1; Methylthioalkylmalate synthase-like 3	LEU12_ARATH	Q9C550	Q8GWX8	IPMS2	IMS1; MAML-3	Arabidopsis thaliana (Mouse-ear cress)
High	Master Protein	GLYMA_10G018400		PTHR10366:SF465 - UDP-GLUCURONIC ACID DECARBOXYLASE 1 (1 of 6)	0	92.56	31	13	46	4	427	48	8.92	129	13	9	1.027	0.996833	76.92	75.5	124.5	39.9	31.41	High	High	High	High	High	High	1		3	3	Present Both	1	GLYMA_10G018400	GLYMA_10G018400	sp|Q9LZI2|UXS2_ARATH	UDP-glucuronic acid decarboxylase 2 GN=UXS2	ident:356/427 pos:384/427 query:427 hit:445 align:435 bit:723.0	OK	UDP-glucuronic acid decarboxylase 2	UDP-XYL synthase 2; UDP-glucuronate decarboxylase 2 (UGD; UXS-2); dTDP-glucose 4-6-dehydratase homolog D18	UXS2_ARATH	Q9LZI2	Q39077	UXS2	AUD1; D18	Arabidopsis thaliana (Mouse-ear cress)
High	Master Protein	GLYMA_13G367000		PTHR10371 - NADH DEHYDROGENASE UBIQUINONE FLAVOPROTEIN 2, MITOCHONDRIAL (1 of 2)	0	93.442	28	7	64	7	299	33.6	7.05	194.56	7	0	1.314	0.945815	45.5	69.9	130.1	40.42	19.94	High	High	High	High	High	High	1		3	3	Present Both	1	GLYMA_13G367000	GLYMA_13G367000	sp|O22769|NDUV2_ARATH	NADH dehydrogenase [ubiquinone] flavoprotein 2, mitochondrial GN=NDL3	ident:191/299 pos:203/299 query:299 hit:255 align:220 bit:405.2	OK	NADH dehydrogenase [ubiquinone] flavoprotein 2, mitochondrial	na	NDUV2_ARATH	O22769	Q940Z9	OrderedLocusNames=At4g02580	na	Arabidopsis thaliana (Mouse-ear cress)
High	Master Protein	GLYMA_07G084100		PTHR10430 - PEROXIREDOXIN (1 of 9)	0	118.268	42	11	56	11	162	17.4	5.59	170.52	11	0	0.739	0.970114	36.34	112.2	87.8	51.48	23.04	High	High	High	High	High	High	1		3	3	Present Both	1	GLYMA_07G084100	GLYMA_07G084100	sp|Q9XEX2|PRX2B_ARATH	Peroxiredoxin-2B GN=PRXIIB	ident:126/162 pos:149/162 query:162 hit:162 align:162 bit:273.9	OK	Peroxiredoxin-2B	Peroxiredoxin IIB; Peroxiredoxin TPx1; Thioredoxin peroxidase 2B; Thioredoxin-dependent peroxidase 1	PRX2B_ARATH	Q9XEX2	na	PRXIIB	TPX1	Arabidopsis thaliana (Mouse-ear cress)
High	Master Protein	GLYMA_13G207000		PTHR10430:SF7 - PEROXIREDOXIN-2F, MITOCHONDRIAL (1 of 4)	0	44.595	41	5	13	5	197	21.2	8.63	38.48	5	0	0.574	0.751569	19.84	122.5	77.5	53.44	35.93	High	Peak Found	High	High	High	High	1		3	3	Present Both	1	GLYMA_13G207000	GLYMA_13G207000	sp|Q9M7T0|PRX2F_ARATH	Peroxiredoxin-2F, mitochondrial GN=PRXIIF	ident:139/197 pos:156/197 query:197 hit:201 align:182 bit:292.0	OK	Peroxiredoxin-2F, mitochondrial	Peroxiredoxin IIF; Thioredoxin peroxidase 2F	PRX2F_ARATH	Q9M7T0	Q8LEJ1; Q8LPM1; Q941C2	PRXIIF	na	Arabidopsis thaliana (Mouse-ear cress)
High	Master Protein	GLYMA_12G223400		PTHR10438//PTHR10438:SF285 - THIOREDOXIN // SUBFAMILY NOT NAMED (1 of 3)	0	5.157	11	2	4	2	182	19.7	8.87	1.68	2	0	0.592	0.789811	8.34	138.2	61.8	14.88	69.89	High	High	Not Found	Peak Found	Not Found	High	1		2	2	Present Both	1	GLYMA_12G223400	GLYMA_12G223400	sp|Q9SEU6|TRXM4_ARATH	Thioredoxin M4, chloroplastic GN=NTRC	ident:84/182 pos:103/182 query:182 hit:193 align:122 bit:190.3	Poor_match	Thioredoxin M4, chloroplastic (AtTrxm4)	na	TRXM4_ARATH	Q9SEU6	Q0WUS9; Q9LDP6	OrderedLocusNames=At3g15360	na	Arabidopsis thaliana (Mouse-ear cress)
High	Master Protein	GLYMA_11G153800		PTHR10502//PTHR10502:SF113 - ANNEXIN // SUBFAMILY NOT NAMED (1 of 11)	0	59.443	35	12	43	7	312	35.9	7.91	92.39	12	0	0.947	0.999168	79.11	82.8	117.2	111.59	94.16	High	High	High	High	High	High	1		3	3	Present Both	1	GLYMA_11G153800	GLYMA_11G153800	sp|Q94CK4|ANXD8_ARATH	Annexin D8 GN=ANNAT8	ident:167/312 pos:233/312 query:312 hit:316 align:311 bit:355.9	OK	Annexin D8	AnnAt8	ANXD8_ARATH	Q94CK4	na	ANNAT8	ANN8	Arabidopsis thaliana (Mouse-ear cress)
High	Master Protein	GLYMA_09G171600		PTHR10502//PTHR10502:SF120 - ANNEXIN // SUBFAMILY NOT NAMED (1 of 3)	0	24.951	14	5	9	5	317	35.5	8.76	18.91	5	0	0.957	0.999168	43.91	105.3	94.7	9.57	48.68	High	High	High	High	High	High	1		3	3	Present Both	1	GLYMA_09G171600	GLYMA_09G171600	sp|Q9C9X3|ANXD5_ARATH	Annexin D5 GN=ANN5	ident:177/317 pos:235/317 query:317 hit:316 align:316 bit:370.9	OK	Annexin D5	AnnAt5	ANXD5_ARATH	Q9C9X3	A0MEF1; Q1PFF4; Q9C5V4	ANN5	ANNAT5	Arabidopsis thaliana (Mouse-ear cress)
High	Master Protein	GLYMA_13G088700		PTHR10502:SF98 - ANNEXIN D1-RELATED (1 of 5)	0	100.039	37	13	52	12	316	35.9	6.96	136.97	13	0	2.343	0.232978	67.12	57	143	71.94	21.32	High	High	High	High	High	High	1		3	3	Present Both	1	GLYMA_13G088700	GLYMA_13G088700	sp|Q9SYT0|ANXD1_ARATH	Annexin D1 GN=ANN1	ident:226/316 pos:268/316 query:316 hit:317 align:317 bit:472.2	OK	Annexin D1	AnnAt1; Annexin A1	ANXD1_ARATH	Q9SYT0	Q39001; Q42023; Q56Y94; Q96527	ANN1	ANNAT1; ANX23-ATH; ATOXY5; OXY5	Arabidopsis thaliana (Mouse-ear cress)
High	Master Protein	GLYMA_17G019300		PTHR10638:SF36 - AMINE OXIDASE-RELATED (1 of 4)	0	140.644	29	12	45	12	674	75.8	6.7	128.52	12	0	0.529	0.649531	16.46	134.3	65.7	29	10.51	High	High	High	High	High	High	1		3	3	Present Both	1	GLYMA_17G019300	GLYMA_17G019300	sp|P0DO00|AMO2_ARATH	Primary amine oxidase 2 GN=ALMT1	ident:344/674 pos:456/674 query:674 hit:662 align:664 bit:689.1	Poor_match	Primary amine oxidase 2	Amine oxidase [copper-containing] 2	AMO2_ARATH	P0DO00	Q9C6V7	OrderedLocusNames=At1g31672	na	Arabidopsis thaliana (Mouse-ear cress)
High	Master Protein	GLYMA_13G241300		PTHR10639:SF7 - CLATHRIN LIGHT CHAIN (1 of 4)	0	300.606	54	32	139	7	313	34.6	5.12	438.82	32	25	1.787	0.584662	88.41	71.8	128.2	57.16	3.72	High	High	High	High	High	High	1		3	3	Present Both	1	GLYMA_13G241300	GLYMA_13G241300	sp|Q9SKU1|CLC1_ARATH	Clathrin light chain 1 GN=CKX6	ident:167/313 pos:199/313 query:313 hit:338 align:302 bit:248.1	OK	Clathrin light chain 1	na	CLC1_ARATH	Q9SKU1	Q8LG44	OrderedLocusNames=At2g20760	na	Arabidopsis thaliana (Mouse-ear cress)
High	Master Protein	GLYMA_15G072100		PTHR10639:SF7 - CLATHRIN LIGHT CHAIN (1 of 4)	0	298.328	52	31	139	6	322	35.3	5.19	429.71	31	0	2.655	0.132841	75.83	37	163	85.7	10.32	High	High	High	High	High	High	1		3	3	Present Both	1	GLYMA_15G072100	GLYMA_15G072100	sp|Q9SKU1|CLC1_ARATH	Clathrin light chain 1 GN=CKX6	ident:168/322 pos:193/322 query:322 hit:338 align:299 bit:244.6	OK	Clathrin light chain 1	na	CLC1_ARATH	Q9SKU1	Q8LG44	OrderedLocusNames=At2g20760	na	Arabidopsis thaliana (Mouse-ear cress)
Medium	Master Protein	GLYMA_10G236600		PTHR10641:SF563 - MYB TRANSCRIPTION FACTOR-RELATED (1 of 4)	0.019	1.361	6	1	3	1	270	30.8	8.79	8.19	1	0	0.514	0.607241	2.29	132.1	67.9	8.24		High	High	Not Found	Not Found	Not Found	High	1		2	1	Only Control	1	GLYMA_10G236600	GLYMA_10G236600	sp|Q9M0K4|LAF1_ARATH	Transcription factor LAF1 GN=LAF1	ident:104/270 pos:141/270 query:270 hit:283 align:222 bit:193.4	Poor_match	Transcription factor LAF1	Myb-related protein 18 (AtMYB18); Protein LONG AFTER FAR-RED LIGHT 1	LAF1_ARATH	Q9M0K4	Q9SUI1; Q9ZTF0	LAF1	na	Arabidopsis thaliana (Mouse-ear cress)
High	Master Protein	GLYMA_07G200100		PTHR10666 - UBIQUITIN (1 of 44)	0.007	2.015	10	1	3	1	82	9.2	8.5	5.43	1	0	0.576	0.756854	6.22	127.9	72.1	15.23	21.64	High	Peak Found	Not Found	High	High	Peak Found	1		2	3	Present Both	1	GLYMA_07G200100	GLYMA_07G200100	sp|Q9S7X3|UBQ11_ARATH	Polyubiquitin 11 GN=UBQ11	ident:48/82 pos:55/82 query:82 hit:229 align:58 bit:101.3	Partial_match_hit	Ubiquitin	na	UBQ11_ARATH	P0CH33	O80715; P59263; Q38875; Q9LDJ2; Q9LYW1; Q9M0W3; Q9M1P9; Q9S7X3	UBQ11	na	Arabidopsis thaliana (Mouse-ear cress)
High	Master Protein	GLYMA_16G139600		PTHR10668:SF83 - PYRIDINE NUCLEOTIDE-DISULFIDE OXIDOREDUCTASE DOMAIN-CONTAINING PROTEIN 2 (1 of 2)	0	4.008	2	1	3	1	565	61.3	7.08	7.19	1	0	0.7	0.946051	32.16	125.4	74.6	39.84	67.84	High	High	Peak Found	Peak Found	Peak Found	High	1		3	3	Present Both	1	GLYMA_16G139600	GLYMA_16G139600	sp|Q9M9Y8|CRTSO_ARATH	Prolycopene isomerase, chloroplastic GN=CRTISO	ident:132/565 pos:229/565 query:565 hit:595 align:565 bit:82.4	Poor_match	Prolycopene isomerase, chloroplastic (CrtISO)	Carotenoid and chloroplast regulation protein 2; Carotenoid isomerase	CRTSO_ARATH	Q9M9Y8	na	CRTISO	CCR2	Arabidopsis thaliana (Mouse-ear cress)
High	Master Protein	GLYMA_05G020200		PTHR10693//PTHR10693:SF24 - RAS GTPASE-ACTIVATING PROTEIN-BINDING PROTEIN // SUBFAMILY NOT NAMED (1 of 2)	0	14.916	10	3	6	3	462	50.3	5.59	11.52	3	0	0.626	0.857731	7.42	125.9	74.1	67.32	8.48	High	High	Peak Found	High	Peak Found	High	1		3	3	Present Both	1	GLYMA_05G020200	GLYMA_05G020200	sp|Q9C7F5|NTF2B_ARATH	Nuclear transport factor 2B GN=NTF2B	ident:43/462 pos:60/462 query:462 hit:126 align:121 bit:57.4	Partial_match_query	Nuclear transport factor 2B (AtNTF2b; NTF-2)	na	NTF2B_ARATH	Q9C7F5	Q1H566	NTF2B	na	Arabidopsis thaliana (Mouse-ear cress)
High	Master Protein	GLYMA_03G103600		PTHR10772:SF13 - CHLOROPLAST CHAPERONIN 10 (1 of 2)	0	30.821	29	3	9	3	134	14.7	8.78	27.89	3	0	0.01	1.31e-16		200				High	Not Found	Peak Found	High	High	High	1		2	3	Present Both	1	GLYMA_03G103600	GLYMA_03G103600	sp|Q9M1C2|CH101_ARATH	10 kDa chaperonin 1, chloroplastic GN=CPN10-1	ident:87/134 pos:112/134 query:134 hit:138 align:138 bit:182.2	OK	10 kDa chaperonin 1, chloroplastic	na	CH101_ARATH	Q9M1C2	na	CPN10-1	na	Arabidopsis thaliana (Mouse-ear cress)
High	Master Protein	GLYMA_03G125800		PTHR10772:SF8 - 10 KDA CHAPERONIN (1 of 4)	0	14.567	32	4	16	2	97	10.6	8.4	26.57	4	2	0.756	0.986871	24.49	117.9	82.1	13.34	5.46	High	High	High	High	High	High	1		3	3	Present Both	1	GLYMA_03G125800	GLYMA_03G125800	sp|P34893|CH10_ARATH	10 kDa chaperonin, mitochondrial GN=CPN10	ident:75/97 pos:87/97 query:97 hit:98 align:97 bit:159.5	OK	10 kDa chaperonin, mitochondrial	Chaperonin 10 (CPN10); Protein groES	CH10_ARATH	P34893	Q96249	CPN10	na	Arabidopsis thaliana (Mouse-ear cress)
High	Master Protein	GLYMA_19G128300		PTHR10772:SF8 - 10 KDA CHAPERONIN (1 of 4)	0	13.769	32	4	18	2	97	10.6	8.4	31.68	4	0	0.804	0.996833	33.87	95.8	104.2	28.93	29.58	High	High	High	High	High	Peak Found	1		3	3	Present Both	1	GLYMA_19G128300	GLYMA_19G128300	sp|P34893|CH10_ARATH	10 kDa chaperonin, mitochondrial GN=CPN10	ident:74/97 pos:87/97 query:97 hit:98 align:97 bit:157.9	OK	10 kDa chaperonin, mitochondrial	Chaperonin 10 (CPN10); Protein groES	CH10_ARATH	P34893	Q96249	CPN10	na	Arabidopsis thaliana (Mouse-ear cress)
High	Master Protein	GLYMA_03G015400		PTHR10774//PTHR10774:SF58 - EXTENDED SYNAPTOTAGMIN-RELATED // SUBFAMILY NOT NAMED (1 of 10)	0	22.689	21	2	10	2	149	16.6	4.32	31.52	2	0	0.375	0.205237	8.92	167.8	32.2	47.62	48.11	High	High	High	Peak Found	High	High	1		3	3	Present Both	1	GLYMA_03G015400	GLYMA_03G015400	sp|Q9C8S6|Y1322_ARATH	C2 domain-containing protein At1g63220 GN=WOX14	ident:91/149 pos:111/149 query:149 hit:147 align:149 bit:183.3	OK	C2 domain-containing protein At1g63220	na	Y1322_ARATH	Q9C8S6	Q8LDR6	OrderedLocusNames=At1g63220	na	Arabidopsis thaliana (Mouse-ear cress)
High	Master Protein	GLYMA_07G040100		PTHR10795//PTHR10795:SF331 - PROPROTEIN CONVERTASE SUBTILISIN/KEXIN // SUBFAMILY NOT NAMED (1 of 2)	0	42.644	8	5	20	2	775	81.7	6.58	81.03	5	0	0.572	0.75101	13.79	147.9	52.1	43.89	46.68	High	High	High	High	High	High	1		3	3	Present Both	1	GLYMA_07G040100	GLYMA_07G040100	sp|Q9LVJ1|SBT14_ARATH	Subtilisin-like protease SBT1.4 GN=SBT1.4	ident:517/775 pos:602/775 query:775 hit:777 align:770 bit:1024.2	OK	Subtilisin-like protease SBT1.4	Subtilase subfamily 1 member 4 (AtSBT1.4)	SBT14_ARATH	Q9LVJ1	B9DHY1; Q0WWH7	SBT1.4	na	Arabidopsis thaliana (Mouse-ear cress)
High	Master Protein	GLYMA_09G243700		PTHR10795//PTHR10795:SF365 - PROPROTEIN CONVERTASE SUBTILISIN/KEXIN // SUBFAMILY NOT NAMED (1 of 8)	0	37.315	7	5	10	2	787	84.3	9.14	30.7	5	0	0.93	0.996833	108.66	42.9	157.1	103.23	66.65	High	High	Peak Found	Peak Found	High	Peak Found	1		3	3	Present Both	1	GLYMA_09G243700	GLYMA_09G243700	sp|F4JXC5|SBT54_ARATH	Subtilisin-like protease SBT5.4 GN=SBT5.4	ident:406/787 pos:524/787 query:787 hit:778 align:774 bit:762.3	Poor_match	Subtilisin-like protease SBT5.4	Subtilase subfamily 5 member 4 (AtSBT5.4)	SBT54_ARATH	F4JXC5	Q8GXU1; Q9FJF3	SBT5.4	na	Arabidopsis thaliana (Mouse-ear cress)
High	Master Protein	GLYMA_14G048000		PTHR10795//PTHR10795:SF365 - PROPROTEIN CONVERTASE SUBTILISIN/KEXIN // SUBFAMILY NOT NAMED (1 of 8)	0	125.558	28	15	36	15	783	84	9.31	112.37	15	0	1.461	0.846919	70.87	93.1	106.9	73.98	78.46	High	High	Peak Found	High	High	High	1		3	3	Present Both	1	GLYMA_14G048000	GLYMA_14G048000	sp|Q9ZSP5|AIR3_ARATH	Subtilisin-like protease SBT5.3 GN=AIR3	ident:399/783 pos:519/783 query:783 hit:772 align:756 bit:779.6	Poor_match	Subtilisin-like protease SBT5.3	Auxin-induced in root cultures protein 3; Subtilase subfamily 5 member 3 (AtSBT5.3); Subtilisin-like protease AIR3	AIR3_ARATH	Q9ZSP5	Q8S896; Q8S8B0; Q93W36	AIR3	SBT5.3	Arabidopsis thaliana (Mouse-ear cress)
High	Master Protein	GLYMA_06G045100		PTHR10795//PTHR10795:SF388 - PROPROTEIN CONVERTASE SUBTILISIN/KEXIN // SUBFAMILY NOT NAMED (1 of 8)	0	36.256	10	6	9	2	769	82.5	8.88	24.84	6	0	0.585	0.774555	15.28	158	42	50.85	44.9	High	Peak Found	Peak Found	High	Peak Found	High	1		3	3	Present Both	1	GLYMA_06G045100	GLYMA_06G045100	sp|O65351|SBT17_ARATH	Subtilisin-like protease SBT1.7 GN=SBT1.7	ident:486/769 pos:583/769 query:769 hit:757 align:739 bit:994.6	OK	Subtilisin-like protease SBT1.7	Cucumisin-like serine protease; Subtilase subfamily 1 member 7 (AtSBT1.7); Subtilisin-like serine protease 1 (At-SLP1)	SBT17_ARATH	O65351	P80854; Q39007; Q8RWQ7	SBT1.7	na	Arabidopsis thaliana (Mouse-ear cress)
High	Master Protein	GLYMA_12G031800		PTHR10795//PTHR10795:SF442 - PROPROTEIN CONVERTASE SUBTILISIN/KEXIN // SUBFAMILY NOT NAMED (1 of 3)	0	53.399	15	9	24	4	773	81.9	9.1	64.16	9	5	1.584	0.75101	37.67	85.7	114.3	57.08	24.93	High	High	Not Found	High	High	High	1		2	3	Present Both	1	GLYMA_12G031800	GLYMA_12G031800	sp|O49607|SBT16_ARATH	Subtilisin-like protease SBT1.6 GN=SBT1.6	ident:573/773 pos:661/773 query:773 hit:764 align:764 bit:1199.1	OK	Subtilisin-like protease SBT1.6	Subtilase subfamily 1 member 6 (AtSBT1.6); Subtilisin-like serine protease 2 (At-SLP2)	SBT16_ARATH	O49607	na	SBT1.6	na	Arabidopsis thaliana (Mouse-ear cress)
High	Master Protein	GLYMA_02G158200		PTHR10795:SF316 - SERINE PROTEASE-LIKE PROTEIN-RELATED (1 of 3)	0	68.715	32	5	21	5	136	14.7	6.52	79.05	5	0	1	0.996833	70.58	191.3	8.7	78.39	149.6	High	High	High	High	High	High	1		3	3	Present Both	1	GLYMA_02G158200	GLYMA_02G158200	sp|Q8L7I2|SBT36_ARATH	Subtilisin-like protease SBT3.6 GN=SBT3.6	ident:43/136 pos:66/136 query:136 hit:778 align:113 bit:75.5	Partial_match_hit	Subtilisin-like protease SBT3.6	Subtilase subfamily 3 member 6 (AtSBT3.6)	SBT36_ARATH	Q8L7I2	A8MS13; F4JMC8; Q0WVJ9; Q9T0B5; Q9ZSB3	SBT3.6	na	Arabidopsis thaliana (Mouse-ear cress)
High	Master Protein	GLYMA_13G339700		PTHR11038//PTHR11038:SF17 - MITOCHONDRIAL IMPORT INNER MEMBRANE TRANSLOCASE SUBUNIT TIM10 // SUBFAMILY NOT NAMED (1 of 1)	0	42.766	36	2	17	2	84	9.7	7.05	48.75	2	0	0.913	0.996833	64.79	163.2	36.8	56.71	46.77	High	High	High	High	High	High	1		3	3	Present Both	1	GLYMA_13G339700	GLYMA_13G339700	sp|Q9ZW33|TIM10_ARATH	Mitochondrial import inner membrane translocase subunit TIM10 GN=TIM10	ident:60/84 pos:69/84 query:84 hit:83 align:84 bit:132.5	OK	Mitochondrial import inner membrane translocase subunit TIM10	na	TIM10_ARATH	Q9ZW33	na	TIM10	na	Arabidopsis thaliana (Mouse-ear cress)
High	Master Protein	GLYMA_12G024700		PTHR11071:SF252 - PEPTIDYL-PROLYL CIS-TRANS ISOMERASE CYP18-3-RELATED (1 of 4)	0	99.031	38	6	42	4	172	18.1	7.83	129.73	6	0	0.903	0.996833	28.08	111.1	88.9	11.83	49.68	High	High	High	High	High	High	1		3	3	Present Both	1	GLYMA_12G024700	GLYMA_12G024700	sp|Q38900|CP19A_ARATH	Peptidyl-prolyl cis-trans isomerase CYP19-1 GN=CYP19-1	ident:144/172 pos:158/172 query:172 hit:173 align:170 bit:312.0	OK	Peptidyl-prolyl cis-trans isomerase CYP19-1 (PPIase CYP19-1)	Cyclophilin of 19 kDa 1; Rotamase cyclophilin-3	CP19A_ARATH	Q38900	F4IL99	CYP19-1	ROC3	Arabidopsis thaliana (Mouse-ear cress)
High	Master Protein	GLYMA_11G098700		PTHR11071:SF264 - PEPTIDYL-PROLYL CIS-TRANS ISOMERASE CYP19-1 (1 of 3)	0	57.712	35	6	31	4	172	18.2	8.46	81.58	6	2	0.838	0.996833	27.6	113.7	86.3	5.88	23.73	High	High	High	High	High	High	1		3	3	Present Both	1	GLYMA_11G098700	GLYMA_11G098700	sp|Q38900|CP19A_ARATH	Peptidyl-prolyl cis-trans isomerase CYP19-1 GN=CYP19-1	ident:149/172 pos:161/172 query:172 hit:173 align:170 bit:320.9	OK	Peptidyl-prolyl cis-trans isomerase CYP19-1 (PPIase CYP19-1)	Cyclophilin of 19 kDa 1; Rotamase cyclophilin-3	CP19A_ARATH	Q38900	F4IL99	CYP19-1	ROC3	Arabidopsis thaliana (Mouse-ear cress)
High	Master Protein	GLYMA_18G050300		PTHR11208//PTHR11208:SF42 - RNA-BINDING PROTEIN RELATED // SUBFAMILY NOT NAMED (1 of 4)	0	3.004	3	1	2	1	283	32.1	8.72	4.03	1	0	0.858	0.996833	14.12	107.7	92.3	13.29	3.74	High	Peak Found	Peak Found	Peak Found	Peak Found	High	1		3	3	Present Both	1	GLYMA_18G050300	GLYMA_18G050300	sp|Q9ZVI3|QKIL3_ARATH	KH domain-containing protein At2g38610 GN=QCR7-1	ident:199/283 pos:225/283 query:283 hit:286 align:289 bit:372.9	OK	KH domain-containing protein At2g38610	Quaking-like protein 3	QKIL3_ARATH	Q9ZVI3	na	OrderedLocusNames=At2g38610	na	Arabidopsis thaliana (Mouse-ear cress)
High	Master Protein	GLYMA_06G016700		PTHR11216:SF72 - CALCIUM-BINDING EF HAND-CONTAINING PROTEIN (1 of 5)	0	23.104	5	5	10	4	1076	117	5.39	26.85	5	1	0.739	0.970114	16.68	122.2	77.8	26.4	31.75	High	High	High	High	High	High	1		3	3	Present Both	1	GLYMA_06G016700	GLYMA_06G016700	sp|B3LF48|EHD2_ARATH	EH domain-containing protein 2 GN=EHD2	ident:37/1076 pos:55/1076 query:1076 hit:546 align:80 bit:82.8	Partial_match_both	EH domain-containing protein 2 (AtEHD2)	na	EHD2_ARATH	B3LF48	F4JGH2; Q9S9W1	EHD2	na	Arabidopsis thaliana (Mouse-ear cress)
High	Master Protein	GLYMA_14G001200		PTHR11216:SF72 - CALCIUM-BINDING EF HAND-CONTAINING PROTEIN (1 of 5)	0	35.405	6	4	11	3	1037	113	5.26	43.86	4	0	0.436	0.382159	1.91	153.7	46.3	28.8	6.76	High	High	High	High	High	High	1		3	3	Present Both	1	GLYMA_14G001200	GLYMA_14G001200	sp|B3LF48|EHD2_ARATH	EH domain-containing protein 2 GN=EHD2	ident:34/1037 pos:53/1037 query:1037 hit:546 align:81 bit:76.6	Partial_match_both	EH domain-containing protein 2 (AtEHD2)	na	EHD2_ARATH	B3LF48	F4JGH2; Q9S9W1	EHD2	na	Arabidopsis thaliana (Mouse-ear cress)
High	Master Protein	GLYMA_17G087500		PTHR11220 - HEME-BINDING PROTEIN-RELATED (1 of 13)	0	39.092	33	4	19	4	213	23.6	8.87	62.88	4	0	0.93	0.996833	58.52	144.9	55.1	36.5	96.8	High	High	High	High	High	High	1		3	3	Present Both	1	GLYMA_17G087500	GLYMA_17G087500	sp|Q9SR77|HBPL1_ARATH	Heme-binding-like protein At3g10130, chloroplastic GN=FLS2	ident:42/213 pos:73/213 query:213 hit:309 align:154 bit:45.1	Partial_match_hit	Heme-binding-like protein At3g10130, chloroplastic	na	HBPL1_ARATH	Q9SR77	Q8L605	OrderedLocusNames=At3g10130	na	Arabidopsis thaliana (Mouse-ear cress)
High	Master Protein	GLYMA_05G216700		PTHR11349:SF53 - NUCLEOSIDE DIPHOSPHATE KINASE-RELATED (1 of 2)	0	120.038	40	13	77	13	235	25.2	9.13	199.87	13	0	0.779	0.996833	37.85	98.3	101.7	17.15	47.2	High	High	High	High	High	High	1		3	3	Present Both	1	GLYMA_05G216700	GLYMA_05G216700	sp|Q8LAH8|NDK4_ARATH	Nucleoside diphosphate kinase IV, chloroplastic/mitochondrial GN=NDK4	ident:187/235 pos:213/235 query:235 hit:237 align:242 bit:383.6	OK	Nucleoside diphosphate kinase IV, chloroplastic/mitochondrial (NDK IV; NDP kinase IV; NDPK IV)	Nucleoside diphosphate kinase 4	NDK4_ARATH	Q8LAH8	Q9T0A5	NDK4	na	Arabidopsis thaliana (Mouse-ear cress)
High	Master Protein	GLYMA_12G078100		PTHR11353:SF11 - CHAPERONIN 60 SUBUNIT ALPHA 1, CHLOROPLASTIC (1 of 2)	0	155.923	33	17	70	17	584	61.7	5.4	217.28	17	0	0.708	0.9559	20.53	111.9	88.1	10.1	6.92	High	High	High	High	High	High	1		3	3	Present Both	1	GLYMA_12G078100	GLYMA_12G078100	sp|P21238|CPNA1_ARATH	Chaperonin 60 subunit alpha 1, chloroplastic GN=CPN60A1	ident:486/584 pos:524/584 query:584 hit:586 align:556 bit:950.7	OK	Chaperonin 60 subunit alpha 1, chloroplastic (CPN-60 alpha 1)	Protein SCHLEPPERLESS; RuBisCO large subunit-binding protein subunit alpha 1	CPNA1_ARATH	P21238	Q42554; Q56WB8; Q8L5U4	CPN60A1	Cpn60-A(2); SLP	Arabidopsis thaliana (Mouse-ear cress)
High	Master Protein	GLYMA_15G250500		PTHR11353:SF8 - CHAPERONIN 60 SUBUNIT BETA 1, CHLOROPLASTIC-RELATED (1 of 3)	0	166.806	28	16	56	16	591	62.8	5.87	209.74	16	0	0.791	0.996833	39.11	133.9	66.1	48.48	45.37	High	High	High	High	High	High	1		3	3	Present Both	1	GLYMA_15G250500	GLYMA_15G250500	sp|Q9LJE4|CPNB2_ARATH	Chaperonin 60 subunit beta 2, chloroplastic GN=CPN60B2	ident:527/591 pos:560/591 query:591 hit:596 align:597 bit:1027.3	OK	Chaperonin 60 subunit beta 2, chloroplastic (CPN-60 beta 2)	na	CPNB2_ARATH	Q9LJE4	na	CPN60B2	Cpn60-B(2)	Arabidopsis thaliana (Mouse-ear cress)
High	Master Protein	GLYMA_08G165500		PTHR11406:SF8 - PHOSPHOGLYCERATE KINASE 1, CHLOROPLASTIC-RELATED (1 of 2)	0	54.486	21	8	20	2	485	50.2	8.13	52.82	8	0	0.354	0.160795	9.66	175.1	24.9	45.22	95.28	High	High	Not Found	Peak Found	Peak Found	Peak Found	1		2	3	Present Both	1	GLYMA_08G165500	GLYMA_08G165500	sp|P50318|PGKH2_ARATH	Phosphoglycerate kinase 2, chloroplastic GN=PGK1	ident:385/485 pos:417/485 query:485 hit:478 align:441 bit:771.2	OK	Phosphoglycerate kinase 2, chloroplastic	na	PGKH2_ARATH	P50318	Q42542; Q9C7J4; Q9SGU6	OrderedLocusNames=At1g56190	na	Arabidopsis thaliana (Mouse-ear cress)
High	Master Protein	GLYMA_15G115300		PTHR11413 - CYSTATIN FAMILY MEMBER (1 of 20)	0	21.963	13	2	10	2	112	12.4	9.03	34.29	2	0	0.45	0.418524	4.76	168	32	38.81	72.84	High	High	High	Peak Found	Peak Found	High	1		3	3	Present Both	1	GLYMA_15G115300	GLYMA_15G115300	sp|Q41916|CYT5_ARATH	Cysteine proteinase inhibitor 5 GN=CYS5	ident:53/112 pos:68/112 query:112 hit:122 align:96 bit:112.1	Poor_match	Cysteine proteinase inhibitor 5 (AtCYS-5)	na	CYT5_ARATH	Q41916	Q8LBN6; Q9FGK2	CYS5	na	Arabidopsis thaliana (Mouse-ear cress)
High	Master Protein	GLYMA_13G071800		PTHR11413//PTHR11413:SF50 - CYSTATIN FAMILY MEMBER // SUBFAMILY NOT NAMED (1 of 4)	0	183.107	92	16	79	6	97	10.7	6.09	284.21	16	10	0.732	0.970114	30.25	92.5	107.5	43.19	23.64	High	High	High	High	High	High	1		3	3	Present Both	1	GLYMA_13G071800	GLYMA_13G071800	sp|Q8H0X6|CYT6_ARATH	Cysteine proteinase inhibitor 6 GN=CYS6	ident:65/97 pos:79/97 query:97 hit:234 align:97 bit:134.8	Partial_match_hit	Cysteine proteinase inhibitor 6 (AtCYS-6)	PIP-M; PRLI-interacting factor M	CYT6_ARATH	Q8H0X6	Q8VZA2; Q9FUB0; Q9LHF9	CYS6	na	Arabidopsis thaliana (Mouse-ear cress)
High	Master Protein	GLYMA_20G045500		PTHR11413//PTHR11413:SF50 - CYSTATIN FAMILY MEMBER // SUBFAMILY NOT NAMED (1 of 4)	0	176.947	92	16	70	6	97	10.7	6.09	240.28	16	0	0.77	0.996833	22.57	159.1	40.9	66.24	69.12	High	High	High	High	High	High	1		3	3	Present Both	1	GLYMA_20G045500	GLYMA_20G045500	sp|Q8H0X6|CYT6_ARATH	Cysteine proteinase inhibitor 6 GN=CYS6	ident:65/97 pos:80/97 query:97 hit:234 align:97 bit:136.0	Partial_match_hit	Cysteine proteinase inhibitor 6 (AtCYS-6)	PIP-M; PRLI-interacting factor M	CYT6_ARATH	Q8H0X6	Q8VZA2; Q9FUB0; Q9LHF9	CYS6	na	Arabidopsis thaliana (Mouse-ear cress)
High	Master Protein	GLYMA_07G266000		PTHR11413:SF26 - CYSTATIN C (1 of 2)	0	15.102	26	2	2	2	114	12.7	7.99	7.12	2	0	0.272	0.0367933	1.04	170.8	29.2	71.77		High	High	Not Found	Not Found	Not Found	Peak Found	1		2	1	Only Control	1	GLYMA_07G266000	GLYMA_07G266000	sp|Q41916|CYT5_ARATH	Cysteine proteinase inhibitor 5 GN=CYS5	ident:47/114 pos:62/114 query:114 hit:122 align:91 bit:96.7	Poor_match	Cysteine proteinase inhibitor 5 (AtCYS-5)	na	CYT5_ARATH	Q41916	Q8LBN6; Q9FGK2	CYS5	na	Arabidopsis thaliana (Mouse-ear cress)
High	Master Protein	GLYMA_13G189500		PTHR11413:SF55 - CYSTEINE PROTEINASE INHIBITOR 6 (1 of 2)	0	125.65	50	12	39	7	245	27.7	7.08	140.04	12	4	0.764	0.996833	47.16	142.3	57.7	63.2	44.88	High	High	High	High	High	High	1		3	3	Present Both	1	GLYMA_13G189500	GLYMA_13G189500	sp|Q8H0X6|CYT6_ARATH	Cysteine proteinase inhibitor 6 GN=CYS6	ident:149/245 pos:180/245 query:245 hit:234 align:233 bit:304.7	OK	Cysteine proteinase inhibitor 6 (AtCYS-6)	PIP-M; PRLI-interacting factor M	CYT6_ARATH	Q8H0X6	Q8VZA2; Q9FUB0; Q9LHF9	CYS6	na	Arabidopsis thaliana (Mouse-ear cress)
High	Master Protein	GLYMA_02G245100		PTHR11467//PTHR11467:SF49 - HISTONE H1/H5 // SUBFAMILY NOT NAMED (1 of 6)	0	53.15	52	6	29	4	176	18.8	10.42	83.94	6	2	1.114	0.996833	52.33	93	107	18.15	25.83	High	High	High	High	High	High	1	Phospho [S122]	3	3	Present Both	1	GLYMA_02G245100	GLYMA_02G245100	sp|Q43386|HMGYA_ARATH	HMG-Y-related protein A GN=HMGA	ident:94/176 pos:113/176 query:176 hit:204 align:179 bit:129.4	OK	HMG-Y-related protein A (AtHMGA)	High mobility group A protein	HMGYA_ARATH	Q43386	P92954; Q8LGC1	HMGA	na	Arabidopsis thaliana (Mouse-ear cress)
High	Master Protein	GLYMA_14G215100		PTHR11467//PTHR11467:SF49 - HISTONE H1/H5 // SUBFAMILY NOT NAMED (1 of 6)	0	35.045	52	6	27	4	176	18.9	10.26	62.52	6	0	1.051	0.996833	50.89	90	110	35.14	14.1	High	High	High	High	High	High	1	Phospho [S122]	3	3	Present Both	1	GLYMA_14G215100	GLYMA_14G215100	sp|Q43386|HMGYA_ARATH	HMG-Y-related protein A GN=HMGA	ident:79/176 pos:107/176 query:176 hit:204 align:177 bit:127.1	Poor_match	HMG-Y-related protein A (AtHMGA)	High mobility group A protein	HMGYA_ARATH	Q43386	P92954; Q8LGC1	HMGA	na	Arabidopsis thaliana (Mouse-ear cress)
High	Master Protein	GLYMA_11G134200		PTHR11527//PTHR11527:SF132 - SMALL HEAT-SHOCK PROTEIN HSP20 FAMILY // SUBFAMILY NOT NAMED (1 of 2)	0.002	2.308	9	1	2	1	148	16.4	5.24	1.76	1	0	1.09	0.996833	49.32	95.7	104.3	38.67	7.78	High	Peak Found	High	Peak Found	Peak Found	Not Found	1		3	2	Present Both	1	GLYMA_11G134200	GLYMA_11G134200	sp|Q9LNW0|HS178_ARATH	17.8 kDa class I heat shock protein GN=HSP17.8	ident:60/148 pos:87/148 query:148 hit:157 align:170 bit:92.8	Poor_match	17.8 kDa class I heat shock protein	17.8 kDa heat shock protein (AtHsp17.8)	HS178_ARATH	Q9LNW0	na	HSP17.8	na	Arabidopsis thaliana (Mouse-ear cress)
High	Master Protein	GLYMA_02G272600		PTHR11527:SF135 - 22.0 KDA HEAT SHOCK PROTEIN (1 of 9)	0	44.155	29	7	21	7	256	28.9	8.02	54.19	7	0	0.956	0.999168	43.77	118.6	81.4	23.99	13.23	High	High	High	High	High	High	1		3	3	Present Both	1	GLYMA_02G272600	GLYMA_02G272600	sp|Q9M670|RTM2_ARATH	Protein RESTRICTED TEV MOVEMENT 2 GN=RTM2	ident:36/256 pos:53/256 query:256 hit:366 align:98 bit:57.4	Partial_match_both	Protein RESTRICTED TEV MOVEMENT 2	Alpha-crystallin domains containing protein 41.3 (AtAcd41.3); Restricted tobacco etch virus movement protein 2	RTM2_ARATH	Q9M670	Q8H7A1	RTM2	na	Arabidopsis thaliana (Mouse-ear cress)
High	Master Protein	GLYMA_02G244300		PTHR11527:SF142 - 15.7 KDA HEAT SHOCK PROTEIN, PEROXISOMAL (1 of 2)	0	132.951	82	14	68	8	144	16.2	7.64	211.11	14	6	1.341	0.941361	75.33	108.3	91.7	25.4	65.99	High	High	High	High	High	High	1		3	3	Present Both	1	GLYMA_02G244300	GLYMA_02G244300	sp|Q9FHQ3|HS157_ARATH	15.7 kDa heat shock protein, peroxisomal GN=HSP15.7	ident:90/144 pos:109/144 query:144 hit:137 align:143 bit:172.9	OK	15.7 kDa heat shock protein, peroxisomal (AtHsp15.7)	na	HS157_ARATH	Q9FHQ3	na	HSP15.7	na	Arabidopsis thaliana (Mouse-ear cress)
High	Master Protein	GLYMA_14G214800		PTHR11527:SF142 - 15.7 KDA HEAT SHOCK PROTEIN, PEROXISOMAL (1 of 2)	0	88.541	71	11	52	5	144	16.2	7.58	134.64	11	0	1.203	0.978376	36.91	155.7	44.3	36.94	76.38	High	High	High	High	High	High	1		3	3	Present Both	1	GLYMA_14G214800	GLYMA_14G214800	sp|Q9FHQ3|HS157_ARATH	15.7 kDa heat shock protein, peroxisomal GN=HSP15.7	ident:92/144 pos:113/144 query:144 hit:137 align:148 bit:176.8	OK	15.7 kDa heat shock protein, peroxisomal (AtHsp15.7)	na	HS157_ARATH	Q9FHQ3	na	HSP15.7	na	Arabidopsis thaliana (Mouse-ear cress)
High	Master Protein	GLYMA_13G176300		PTHR11527:SF158 - 17.6 KDA CLASS I HEAT SHOCK PROTEIN 1-RELATED (1 of 20)	0	125.323	68	10	33	3	161	18.5	8.34	118.87	10	8	1.138	0.996833	101.4	119.8	80.2	30.04	133.81	High	High	High	High	High	High	1		3	3	Present Both	1	GLYMA_13G176300	GLYMA_13G176300	sp|Q9LNW0|HS178_ARATH	17.8 kDa class I heat shock protein GN=HSP17.8	ident:116/161 pos:136/161 query:161 hit:157 align:165 bit:224.6	OK	17.8 kDa class I heat shock protein	17.8 kDa heat shock protein (AtHsp17.8)	HS178_ARATH	Q9LNW0	na	HSP17.8	na	Arabidopsis thaliana (Mouse-ear cress)
High	Master Protein	GLYMA_12G013100		PTHR11527:SF95 - 23.5 KDA HEAT SHOCK PROTEIN, MITOCHONDRIAL-RELATED (1 of 2)	0	23.236	12	2	6	2	211	23.7	6.98	22.46	2	0	0.872	0.996833	77.08	108.7	91.3	60.61		High	High	Peak Found	Not Found	Not Found	High	1		3	1	Only Control	1	GLYMA_12G013100	GLYMA_12G013100	sp|Q96331|HS23M_ARATH	23.6 kDa heat shock protein, mitochondrial GN=HSP23.6	ident:131/211 pos:164/211 query:211 hit:210 align:216 bit:230.7	OK	23.6 kDa heat shock protein, mitochondrial (AtHsp23.6)	na	HS23M_ARATH	Q96331	O23640; Q541V4; Q9SAN6	HSP23.6	na	Arabidopsis thaliana (Mouse-ear cress)
High	Master Protein	GLYMA_14G219700		PTHR11528:SF45 - ENDOPLASMIN HOMOLOG (1 of 2)	0	114.622	15	13	61	1	847	97.3	5.02	195.31	13	11	1.013	0.996833	71.59	71.1	128.9	62.84	51.39	High	Peak Found	High	High	High	Peak Found	1		3	3	Present Both	1	GLYMA_14G219700	GLYMA_14G219700	sp|Q9STX5|ENPL_ARATH	Endoplasmin homolog GN=HSP90-7	ident:645/847 pos:711/847 query:847 hit:823 align:810 bit:1221.1	OK	Endoplasmin homolog	Glucose-regulated protein 94 homolog (GRP-94 homolog); Heat shock protein 90-7 (AtHSP90.7; AtHsp90-7); Protein SHEPHERD	ENPL_ARATH	Q9STX5	O22972; Q56Y38; Q8VY71	HSP90-7	na	Arabidopsis thaliana (Mouse-ear cress)
High	Master Protein	GLYMA_05G026300		PTHR11540:SF14 - MALATE DEHYDROGENASE, CHLOROPLASTIC (1 of 2)	0	51.623	37	9	19	4	413	43.6	6.92	55.64	9	0	0.987	0.996833	41.29	97.3	102.7	19.1	35.84	High	High	High	High	High	High	1		3	3	Present Both	1	GLYMA_05G026300	GLYMA_05G026300	sp|Q9SN86|MDHP_ARATH	Malate dehydrogenase, chloroplastic GN=IDN2	ident:302/413 pos:341/413 query:413 hit:403 align:403 bit:579.3	OK	Malate dehydrogenase, chloroplastic	Chloroplastic malate dehydrogenase (Chloroplastic MDH; cpNAD-MDH); Plastidic NAD-dependent malate dehydrogenase (pNAD-MDH)	MDHP_ARATH	Q9SN86	O81844	OrderedLocusNames=At3g47520	na	Arabidopsis thaliana (Mouse-ear cress)
High	Master Protein	GLYMA_04G004900		PTHR11544 - COLD SHOCK DOMAIN CONTAINING PROTEINS (1 of 8)	0	21.391	18	2	6	2	194	18.7	6.32	21.48	2	0	0.01	1.31e-16		200		23.79		High	High	High	Not Found	Not Found	High	1		3	1	Only Control	1	GLYMA_04G004900	GLYMA_04G004900	sp|Q38896|CSP4_ARATH	Cold shock domain-containing protein 4 GN=CSP4	ident:114/194 pos:127/194 query:194 hit:201 align:195 bit:134.0	OK	Cold shock domain-containing protein 4 (AtCSP4)	Glycine-rich protein 2b (AtGRP2b)	CSP4_ARATH	Q38896	Q5BIT2	CSP4	GRP2B	Arabidopsis thaliana (Mouse-ear cress)
High	Master Protein	GLYMA_12G030800		PTHR11544 - COLD SHOCK DOMAIN CONTAINING PROTEINS (1 of 8)	0	108.789	37	10	57	2	200	18.8	6.76	218.42	10	7	0.633	0.862691	22.14	124	76	4.37	23.11	High	High	High	High	High	High	1		3	3	Present Both	1	GLYMA_12G030800	GLYMA_12G030800	sp|Q38896|CSP4_ARATH	Cold shock domain-containing protein 4 GN=CSP4	ident:124/200 pos:138/200 query:200 hit:201 align:199 bit:139.0	OK	Cold shock domain-containing protein 4 (AtCSP4)	Glycine-rich protein 2b (AtGRP2b)	CSP4_ARATH	Q38896	Q5BIT2	CSP4	GRP2B	Arabidopsis thaliana (Mouse-ear cress)
High	Master Protein	GLYMA_05G217300		PTHR11566:SF58 - DYNAMIN-RELATED PROTEIN 1A (1 of 6)	0	77.71	28	13	49	13	610	68.3	7.99	133.73	13	0	0.818	0.996833	28.97	113.6	86.4	23.41	1.22	High	High	High	High	High	High	1	Acetyl [N-Term]	3	3	Present Both	1	GLYMA_05G217300	GLYMA_05G217300	sp|P42697|DRP1A_ARATH	Dynamin-related protein 1A GN=DRP1A	ident:529/610 pos:588/610 query:610 hit:610 align:610 bit:1128.2	OK	Dynamin-related protein 1A	Dynamin-like protein 1; Dynamin-like protein A; Protein RADIAL SWELLING 9	DRP1A_ARATH	P42697	Q0WLG2; Q1EBU0; Q39118; Q8L9V5; Q8LPS7	DRP1A	ADL1; ADL1A; AG68; RSW9	Arabidopsis thaliana (Mouse-ear cress)
High	Master Protein	GLYMA_01G124300		PTHR11581//PTHR11581:SF11 - 30S/40S RIBOSOMAL PROTEIN S4 // SUBFAMILY NOT NAMED (1 of 2)	0	98.279	25	7	49	3	264	30	10.23	172.97	7	0	1.122	0.996833	34.24	93.8	106.2	20.36	24.61	High	High	High	High	High	High	1		3	3	Present Both	1	GLYMA_01G124300	GLYMA_01G124300	sp|Q8VYK6|RS43_ARATH	40S ribosomal protein S4-3 GN=RPS4D	ident:239/264 pos:255/264 query:264 hit:262 align:260 bit:510.0	OK	40S ribosomal protein S4-3	na	RS43_ARATH	Q8VYK6	Q944M1; Q9FGI0	RPS4D	na	Arabidopsis thaliana (Mouse-ear cress)
High	Master Protein	GLYMA_04G023900		PTHR11588//PTHR11588:SF118 - TUBULIN // SUBFAMILY NOT NAMED (1 of 4)	0	120.326	31	14	44	4	449	50.6	4.87	142.73	14	12	0.729	0.970114	31.64	137.5	62.5	32.31	10.51	High	High	High	High	High	High	1		3	3	Present Both	1	GLYMA_04G023900	GLYMA_04G023900	sp|P12411|TBB1_ARATH	Tubulin beta-1 chain GN=TUBB1	ident:410/449 pos:426/449 query:449 hit:447 align:432 bit:844.3	OK	Tubulin beta-1 chain	Beta-1-tubulin	TBB1_ARATH	P12411	Q8GZ16; Q9SYQ7	TUBB1	TUB1	Arabidopsis thaliana (Mouse-ear cress)
High	Master Protein	GLYMA_01G109300		PTHR11588//PTHR11588:SF122 - TUBULIN // SUBFAMILY NOT NAMED (1 of 3)	0	124.288	31	13	46	5	449	50.6	4.87	142.8	13	0	0.699	0.946051	31.77	142.7	57.3	47.63	47.74	High	High	High	High	High	High	1		3	3	Present Both	1	GLYMA_01G109300	GLYMA_01G109300	sp|P29516|TBB8_ARATH	Tubulin beta-8 chain GN=TUBB8	ident:430/449 pos:439/449 query:449 hit:449 align:444 bit:906.0	OK	Tubulin beta-8 chain	Beta-8-tubulin	TBB8_ARATH	P29516	Q93Y15; Q9FF94	TUBB8	TUB8	Arabidopsis thaliana (Mouse-ear cress)
High	Master Protein	GLYMA_05G207500		PTHR11588//PTHR11588:SF124 - TUBULIN // SUBFAMILY NOT NAMED (1 of 2)	0	92.976	24	10	28	2	446	49.9	5.01	97.03	10	0	0.385	0.230622	9.3	159.8	40.2	29.86	13.42	High	Peak Found	High	High	High	Peak Found	1		3	3	Present Both	1	GLYMA_05G207500	GLYMA_05G207500	sp|P29514|TBB6_ARATH	Tubulin beta-6 chain GN=TUBB6	ident:398/446 pos:417/446 query:446 hit:449 align:430 bit:827.4	OK	Tubulin beta-6 chain	Beta-6-tubulin	TBB6_ARATH	P29514	na	TUBB6	TUB6	Arabidopsis thaliana (Mouse-ear cress)
High	Master Protein	GLYMA_05G110200		PTHR11588:SF101 - TUBULIN ALPHA-2 CHAIN-RELATED (1 of 8)	0	62.009	23	6	18	4	450	49.6	5.1	63.72	6	2	0.383	0.227108	8.97	142.9	57.1	56.46	0.95	High	High	High	High	Peak Found	High	1		3	3	Present Both	1	GLYMA_05G110200	GLYMA_05G110200	sp|Q0WV25|TBA4_ARATH	Tubulin alpha-4 chain GN=TUBA4	ident:433/450 pos:440/450 query:450 hit:450 align:450 bit:904.4	OK	Tubulin alpha-4 chain	na	TBA4_ARATH	Q0WV25	P29510	TUBA4	TUA4	Arabidopsis thaliana (Mouse-ear cress)
High	Master Protein	GLYMA_08G115100		PTHR11588:SF48 - TUBULIN ALPHA-1 CHAIN-RELATED (1 of 5)	0	48.787	19	5	16	3	450	49.6	5.14	55.21	5	0	0.357	0.166432	3.74	147.3	52.7	16.97	32.64	High	High	High	High	High	High	1		3	3	Present Both	1	GLYMA_08G115100	GLYMA_08G115100	sp|Q56WH1|TBA3_ARATH	Tubulin alpha-3 chain GN=TUBA3	ident:439/450 pos:445/450 query:450 hit:450 align:450 bit:916.8	OK	Tubulin alpha-3 chain	na	TBA3_ARATH	Q56WH1	P20363	TUBA3	TUA3	Arabidopsis thaliana (Mouse-ear cress)
High	Master Protein	GLYMA_02G149100		PTHR11592:SF17 - GLUTATHIONE PEROXIDASE 4-RELATED (1 of 4)	0	27.098	37	7	24	7	170	19.1	9.61	46.57	7	0	1.104	0.996833	117.97	27.6	172.4	107.38	73.88	High	High	High	High	High	Peak Found	1		3	3	Present Both	1	GLYMA_02G149100	GLYMA_02G149100	sp|Q8L910|GPX4_ARATH	Probable glutathione peroxidase 4 GN=GPX4	ident:111/170 pos:136/170 query:170 hit:170 align:170 bit:245.7	OK	Probable glutathione peroxidase 4	na	GPX4_ARATH	Q8L910	na	GPX4	na	Arabidopsis thaliana (Mouse-ear cress)
High	Master Protein	GLYMA_02G294500		PTHR11624:SF56 - PYRUVATE DEHYDROGENASE E1 COMPONENT SUBUNIT BETA, MITOCHONDRIAL (1 of 3)	0	56.186	27	7	44	7	360	38.7	5.96	93.01	7	0	1.207	0.977957	31.98	91.1	108.9	6.75	8.42	High	High	High	High	High	High	1		3	3	Present Both	1	GLYMA_02G294500	GLYMA_02G294500	sp|Q38799|ODPB1_ARATH	Pyruvate dehydrogenase E1 component subunit beta-1, mitochondrial GN=PDH2	ident:303/360 pos:332/360 query:360 hit:363 align:362 bit:630.2	OK	Pyruvate dehydrogenase E1 component subunit beta-1, mitochondrial (PDHE1-B)	Protein MACCI-BOU	ODPB1_ARATH	Q38799	Q9LSM8	PDH2	MAB1	Arabidopsis thaliana (Mouse-ear cress)
High	Master Protein	GLYMA_09G021400		PTHR11649:SF65 - PROTEIN ROOT HAIR DEFECTIVE 3 HOMOLOG 2 (1 of 2)	0	11.103	2	1	8	1	829	92.8	5.85	26.45	1	0	0.749	0.977957	5.16	114.3	85.7	15.65	2.36	High	High	High	High	High	High	1		3	3	Present Both	1	GLYMA_09G021400	GLYMA_09G021400	sp|Q9FKE9|RHD32_ARATH	Protein ROOT HAIR DEFECTIVE 3 homolog 2 GN=RDL2	ident:581/829 pos:690/829 query:829 hit:834 align:832 bit:1187.2	OK	Protein ROOT HAIR DEFECTIVE 3 homolog 2	Protein SEY1 homolog 3	RHD32_ARATH	Q9FKE9	na	OrderedLocusNames=At5g45160	na	Arabidopsis thaliana (Mouse-ear cress)
High	Master Protein	GLYMA_09G138400		PTHR11655:SF14 - 54S RIBOSOMAL PROTEIN L6, MITOCHONDRIAL (1 of 2)	0	7.157	14	2	3	2	226	25	9.96	7.11	2	0	0.219	0.00766571	1.82	176.7	23.3		35.08	High	Not Found	Not Found	Not Found	Peak Found	High	1		1	2	Only Sample	1	GLYMA_09G138400	GLYMA_09G138400	sp|O23049|RK6_ARATH	50S ribosomal protein L6, chloroplastic GN=RPL6	ident:177/226 pos:200/226 query:226 hit:223 align:226 bit:364.0	OK	50S ribosomal protein L6, chloroplastic	Protein EMBRYO DEFECTIVE 2394	RK6_ARATH	O23049	na	RPL6	EMB2394	Arabidopsis thaliana (Mouse-ear cress)
High	Master Protein	GLYMA_12G002100		PTHR11695:SF507 - QUINONE-OXIDOREDUCTASE HOMOLOG, CHLOROPLASTIC-RELATED (1 of 4)	0	130.751	55	14	62	14	328	34.8	8.19	182.93	14	0	0.678	0.945815	24.96	122.3	77.7	27.47	9.23	High	High	High	High	High	High	1		3	3	Present Both	1	GLYMA_12G002100	GLYMA_12G002100	sp|Q9SV68|QORH_ARATH	Chloroplast envelope quinone oxidoreductase homolog GN=CEQORH	ident:232/328 pos:278/328 query:328 hit:329 align:326 bit:473.4	OK	Chloroplast envelope quinone oxidoreductase homolog (ceQORH)	na	QORH_ARATH	Q9SV68	na	CEQORH	na	Arabidopsis thaliana (Mouse-ear cress)
High	Master Protein	GLYMA_17G012300		PTHR11709//PTHR11709:SF11 - MULTI-COPPER OXIDASE // SUBFAMILY NOT NAMED (1 of 3)	0	8.06	5	2	4	2	549	62	9.41	7.63	2	0	1.212	0.977957	6.31	90.4	109.6	5.19	6.23	High	High	Not Found	Peak Found	High	Not Found	1		2	2	Present Both	1	GLYMA_17G012300	GLYMA_17G012300	sp|Q9SU40|SKU5_ARATH	Monocopper oxidase-like protein SKU5 GN=SKU5	ident:267/549 pos:352/549 query:549 hit:587 align:548 bit:512.7	Poor_match	Monocopper oxidase-like protein SKU5	Skewed roots	SKU5_ARATH	Q9SU40	Q0WM56; Q8H7C9	SKU5	na	Arabidopsis thaliana (Mouse-ear cress)
High	Master Protein	GLYMA_08G157700		PTHR11739:SF8 - CITRATE SYNTHASE, MITOCHONDRIAL (1 of 2)	0	20.192	5	2	6	2	472	52.5	8.25	17.56	2	0	0.387	0.233946	0	144.2	55.8			High	High	Not Found	Not Found	High	High	1		2	2	Present Both	1	GLYMA_08G157700	GLYMA_08G157700	sp|P20115|CISY4_ARATH	Citrate synthase 4, mitochondrial GN=CSY4	ident:345/472 pos:406/472 query:472 hit:474 align:473 bit:721.9	OK	Citrate synthase 4, mitochondrial	na	CISY4_ARATH	P20115	O64869; Q8LE36; Q94EY6	CSY4	na	Arabidopsis thaliana (Mouse-ear cress)
High	Master Protein	GLYMA_08G296700		PTHR11743//PTHR11743:SF31 - VOLTAGE-DEPENDENT ANION-SELECTIVE CHANNEL // SUBFAMILY NOT NAMED (1 of 6)	0	251.697	50	19	163	2	276	29.8	7.68	598.05	19	15	0.987	0.996833	35.79	106.6	93.4	21.94	16.07	High	High	High	High	Peak Found	High	1		3	3	Present Both	1	GLYMA_08G296700	GLYMA_08G296700	sp|Q9SRH5|VDAC1_ARATH	Mitochondrial outer membrane protein porin 1 GN=VDAC1	ident:187/276 pos:231/276 query:276 hit:276 align:276 bit:391.0	OK	Mitochondrial outer membrane protein porin 1	Voltage-dependent anion-selective channel protein 1 (AtVDAC1; VDAC-1)	VDAC1_ARATH	Q9SRH5	na	VDAC1	na	Arabidopsis thaliana (Mouse-ear cress)
High	Master Protein	GLYMA_09G240600		PTHR11743//PTHR11743:SF31 - VOLTAGE-DEPENDENT ANION-SELECTIVE CHANNEL // SUBFAMILY NOT NAMED (1 of 6)	0	487.093	77	29	395	5	276	29.7	8.65	1646.54	29	22	0.786	0.996833	23	110.5	89.5	38.26	6.74	High	High	High	High	High	High	1		3	3	Present Both	1	GLYMA_09G240600	GLYMA_09G240600	sp|Q9SRH5|VDAC1_ARATH	Mitochondrial outer membrane protein porin 1 GN=VDAC1	ident:202/276 pos:242/276 query:276 hit:276 align:276 bit:424.9	OK	Mitochondrial outer membrane protein porin 1	Voltage-dependent anion-selective channel protein 1 (AtVDAC1; VDAC-1)	VDAC1_ARATH	Q9SRH5	na	VDAC1	na	Arabidopsis thaliana (Mouse-ear cress)
High	Master Protein	GLYMA_13G064900		PTHR11743//PTHR11743:SF31 - VOLTAGE-DEPENDENT ANION-SELECTIVE CHANNEL // SUBFAMILY NOT NAMED (1 of 6)	0	414.115	77	29	263	10	276	29.7	9.06	942.41	29	10	0.891	0.996833	29.86	114.1	85.9	39.24	15.59	High	High	High	High	High	High	1		3	3	Present Both	1	GLYMA_13G064900	GLYMA_13G064900	sp|Q9SRH5|VDAC1_ARATH	Mitochondrial outer membrane protein porin 1 GN=VDAC1	ident:205/276 pos:246/276 query:276 hit:276 align:276 bit:428.7	OK	Mitochondrial outer membrane protein porin 1	Voltage-dependent anion-selective channel protein 1 (AtVDAC1; VDAC-1)	VDAC1_ARATH	Q9SRH5	na	VDAC1	na	Arabidopsis thaliana (Mouse-ear cress)
High	Master Protein	GLYMA_18G125500		PTHR11743//PTHR11743:SF31 - VOLTAGE-DEPENDENT ANION-SELECTIVE CHANNEL // SUBFAMILY NOT NAMED (1 of 6)	0	254.32	50	19	167	2	276	29.8	7.68	611.65	19	0	0.985	0.996833	11.94	100.7	99.3	6.07	19.58	High	High	High	High	High	High	1		3	3	Present Both	1	GLYMA_18G125500	GLYMA_18G125500	sp|Q9SRH5|VDAC1_ARATH	Mitochondrial outer membrane protein porin 1 GN=VDAC1	ident:187/276 pos:230/276 query:276 hit:276 align:276 bit:389.8	OK	Mitochondrial outer membrane protein porin 1	Voltage-dependent anion-selective channel protein 1 (AtVDAC1; VDAC-1)	VDAC1_ARATH	Q9SRH5	na	VDAC1	na	Arabidopsis thaliana (Mouse-ear cress)
High	Master Protein	GLYMA_18G255700		PTHR11743//PTHR11743:SF31 - VOLTAGE-DEPENDENT ANION-SELECTIVE CHANNEL // SUBFAMILY NOT NAMED (1 of 6)	0	483.558	77	29	397	5	276	29.8	8.65	1647.38	29	0	0.716	0.970114	11.52	121.1	78.9	9.35	8.93	High	High	High	High	High	High	1		3	3	Present Both	1	GLYMA_18G255700	GLYMA_18G255700	sp|Q9SRH5|VDAC1_ARATH	Mitochondrial outer membrane protein porin 1 GN=VDAC1	ident:202/276 pos:243/276 query:276 hit:276 align:276 bit:425.2	OK	Mitochondrial outer membrane protein porin 1	Voltage-dependent anion-selective channel protein 1 (AtVDAC1; VDAC-1)	VDAC1_ARATH	Q9SRH5	na	VDAC1	na	Arabidopsis thaliana (Mouse-ear cress)
High	Master Protein	GLYMA_19G020100		PTHR11743//PTHR11743:SF31 - VOLTAGE-DEPENDENT ANION-SELECTIVE CHANNEL // SUBFAMILY NOT NAMED (1 of 6)	0	383.053	76	27	275	8	276	29.7	9.07	1067.56	27	0	0.657	0.90463	40.44	122.4	77.6	89	16.83	High	High	High	High	High	High	1		3	3	Present Both	1	GLYMA_19G020100	GLYMA_19G020100	sp|Q9SRH5|VDAC1_ARATH	Mitochondrial outer membrane protein porin 1 GN=VDAC1	ident:204/276 pos:244/276 query:276 hit:276 align:276 bit:425.2	OK	Mitochondrial outer membrane protein porin 1	Voltage-dependent anion-selective channel protein 1 (AtVDAC1; VDAC-1)	VDAC1_ARATH	Q9SRH5	na	VDAC1	na	Arabidopsis thaliana (Mouse-ear cress)
High	Master Protein	GLYMA_13G096000		PTHR11743:SF27 - MITOCHONDRIAL OUTER MEMBRANE PROTEIN PORIN 4 (1 of 2)	0	78.912	41	10	35	3	277	29.7	8.57	104.07	10	5	0.653	0.894997	24.29	134.5	65.5	34.9	54.75	High	Not Found	High	High	High	Peak Found	1		2	3	Present Both	1	GLYMA_13G096000	GLYMA_13G096000	sp|Q9FKM2|VDAC4_ARATH	Mitochondrial outer membrane protein porin 4 GN=VDAC4	ident:170/277 pos:213/277 query:277 hit:274 align:277 bit:343.6	OK	Mitochondrial outer membrane protein porin 4	Voltage-dependent anion-selective channel protein 4 (AtVDAC4; VDAC-4)	VDAC4_ARATH	Q9FKM2	na	VDAC4	na	Arabidopsis thaliana (Mouse-ear cress)
High	Master Protein	GLYMA_01G193700		PTHR11743:SF29 - MITOCHONDRIAL OUTER MEMBRANE PROTEIN PORIN 2-RELATED (1 of 2)	0	280.89	95	25	162	8	276	29.1	9.11	638.05	25	15	0.814	0.996833	26.49	111.2	88.8	3.7	2.48	High	High	High	High	High	High	1		3	3	Present Both	1	GLYMA_01G193700	GLYMA_01G193700	sp|Q9FJX3|VDAC2_ARATH	Mitochondrial outer membrane protein porin 2 GN=VDAC2	ident:193/276 pos:237/276 query:276 hit:276 align:276 bit:412.1	OK	Mitochondrial outer membrane protein porin 2	Voltage-dependent anion-selective channel protein 2 (AtVDAC2; VDAC-2)	VDAC2_ARATH	Q9FJX3	na	VDAC2	na	Arabidopsis thaliana (Mouse-ear cress)
High	Master Protein	GLYMA_11G048200		PTHR11743:SF29 - MITOCHONDRIAL OUTER MEMBRANE PROTEIN PORIN 2-RELATED (1 of 2)	0	244.455	84	22	148	5	276	29.2	9.29	585.08	22	0	1.191	0.991822	57.54	96.3	103.7	29.33	5.88	High	High	High	High	High	High	1		3	3	Present Both	1	GLYMA_11G048200	GLYMA_11G048200	sp|Q9FJX3|VDAC2_ARATH	Mitochondrial outer membrane protein porin 2 GN=VDAC2	ident:196/276 pos:237/276 query:276 hit:276 align:276 bit:416.0	OK	Mitochondrial outer membrane protein porin 2	Voltage-dependent anion-selective channel protein 2 (AtVDAC2; VDAC-2)	VDAC2_ARATH	Q9FJX3	na	VDAC2	na	Arabidopsis thaliana (Mouse-ear cress)
High	Master Protein	GLYMA_10G134600		PTHR11761//PTHR11761:SF10 - 50S/60S RIBOSOMAL PROTEIN L14/L23 // SUBFAMILY NOT NAMED (1 of 6)	0	32.457	40	2	9	2	45	4.8	6.49	33.48	2	0	1.177	0.996833	50.43	110.7	89.3	44.13	46.29	High	High	High	Peak Found	High	High	1		3	3	Present Both	1	GLYMA_10G134600	GLYMA_10G134600	sp|P49690|RL23_ARATH	60S ribosomal protein L23 GN=RPL23C	ident:42/45 pos:42/45 query:45 hit:140 align:45 bit:89.0	Partial_match_hit	60S ribosomal protein L23	Protein EMBRYO DEFECTIVE 2171	RL23_ARATH	P49690	Q8L8P0; Q9SDB5	RPL23A	na	Arabidopsis thaliana (Mouse-ear cress)
High	Master Protein	GLYMA_01G001300		PTHR11764:SF15 - CYCLOARTENOL SYNTHASE (1 of 1)	0	14.697	4	3	12	3	757	86.3	6.8	22.78	3	0	0.998	0.996833	26.4	99.4	100.6	41.52	2.8	High	High	High	High	High	High	1		3	3	Present Both	1	GLYMA_01G001300	GLYMA_01G001300	sp|P38605|CAS1_ARATH	Cycloartenol synthase GN=CAS1	ident:607/757 pos:684/757 query:757 hit:759 align:754 bit:1329.7	OK	Cycloartenol synthase (AtCYC)	2,3-epoxysqualene--cycloartenol cyclase	CAS1_ARATH	P38605	P92967	CAS1	CYC	Arabidopsis thaliana (Mouse-ear cress)
High	Master Protein	GLYMA_20G024800		PTHR11817:SF5 - PYRUVATE KINASE-RELATED (1 of 4)	0	7.214	6	2	5	2	502	54.3	7.2	11.04	2	0	1.003	0.996833	1.54	81.5	118.5	49.73		High	High	Not Found	Not Found	Not Found	High	1		2	1	Only Control	1	GLYMA_20G024800	GLYMA_20G024800	sp|O65595|KPYC_ARATH	Probable pyruvate kinase, cytosolic isozyme GN=KPL	ident:416/502 pos:457/502 query:502 hit:497 align:494 bit:880.9	OK	Probable pyruvate kinase, cytosolic isozyme (PK)	na	KPYC_ARATH	O65595	na	OrderedLocusNames=At4g26390	na	Arabidopsis thaliana (Mouse-ear cress)
High	Master Protein	GLYMA_17G053800		PTHR11875//PTHR11875:SF73 - TESTIS-SPECIFIC Y-ENCODED PROTEIN // SUBFAMILY NOT NAMED (1 of 2)	0	54.841	12	4	16	3	379	43.5	4.5	59.39	4	1	0.772	0.996833	32.56	151.9	48.1	26.84	30.13	High	High	High	High	High	High	1		3	3	Present Both	1	GLYMA_17G053800	GLYMA_17G053800	sp|Q9ZUP3|NAP1B_ARATH	Nucleosome assembly protein 1 GN=NAP1	ident:236/379 pos:273/379 query:379 hit:379 align:300 bit:450.7	OK	Nucleosome assembly protein 1;2 (AtNAP1;2)	Nucleosome/chromatin assembly factor group A2	NAP1B_ARATH	Q9ZUP3	B9DFH2	NAP1	NFA2	Arabidopsis thaliana (Mouse-ear cress)
High	Master Protein	GLYMA_03G190500		PTHR11902//PTHR11902:SF18 - ENOLASE // SUBFAMILY NOT NAMED (1 of 4)	0	120.045	22	10	45	7	444	47.6	5.69	193.24	10	2	0.392	0.247651	17.1	146	54	61.8	43.23	High	High	High	High	High	High	1		3	3	Present Both	1	GLYMA_03G190500	GLYMA_03G190500	sp|P25696|ENO2_ARATH	Bifunctional enolase 2/transcriptional activator GN=ENO2	ident:393/444 pos:413/444 query:444 hit:444 align:444 bit:818.1	OK	Bifunctional enolase 2/transcriptional activator	2-phospho-D-glycerate hydro-lyase 2; 2-phosphoglycerate dehydratase 2; LOW EXPRESSION OF OSMOTICALLY RESPONSIVE GENES 1	ENO2_ARATH	P25696	Q8RWM8; Q8VYG4; Q940N0	ENO2	LOS2	Arabidopsis thaliana (Mouse-ear cress)
High	Master Protein	GLYMA_16G204600		PTHR11902//PTHR11902:SF18 - ENOLASE // SUBFAMILY NOT NAMED (1 of 4)	0	66.966	17	5	25	1	445	48	6.47	101.94	5	1	1.069	0.996833	2.59	152.8	47.2	28.3		High	High	Not Found	Not Found	Not Found	High	1		2	1	Only Control	1	GLYMA_16G204600	GLYMA_16G204600	sp|P25696|ENO2_ARATH	Bifunctional enolase 2/transcriptional activator GN=ENO2	ident:386/445 pos:413/445 query:445 hit:444 align:445 bit:800.0	OK	Bifunctional enolase 2/transcriptional activator	2-phospho-D-glycerate hydro-lyase 2; 2-phosphoglycerate dehydratase 2; LOW EXPRESSION OF OSMOTICALLY RESPONSIVE GENES 1	ENO2_ARATH	P25696	Q8RWM8; Q8VYG4; Q940N0	ENO2	LOS2	Arabidopsis thaliana (Mouse-ear cress)
Medium	Master Protein	GLYMA_18G300100		PTHR11909:SF146 - CASEIN KINASE-LIKE PROTEIN (1 of 4)	0.013	1.737	3	1	1	1	672	75.3	9.31	1.92	1	0	1.791	0.583347	88.88	116.5	83.5	54.05	85.04	High	Peak Found	Peak Found	Peak Found	Peak Found	Peak Found	1		3	3	Present Both	1	GLYMA_18G300100	GLYMA_18G300100	sp|Q9FFH8|CKL7_ARATH	Casein kinase 1-like protein 7 GN=CKL7	ident:109/672 pos:174/672 query:672 hit:476 align:289 bit:203.8	Partial_match_query	Casein kinase 1-like protein 7	Protein CASEIN KINASE I-LIKE 7	CKL7_ARATH	Q9FFH8	Q8W0Z0	CKL7	na	Arabidopsis thaliana (Mouse-ear cress)
High	Master Protein	GLYMA_02G238700		PTHR11911 - INOSINE-5-MONOPHOSPHATE DEHYDROGENASE RELATED (1 of 11)	0	135.91	49	10	53	3	205	22.7	8.66	154.12	10	0	0.852	0.996833	47.4	112.5	87.5	8.18	8.98	High	High	High	High	Peak Found	High	1		3	3	Present Both	1	GLYMA_02G238700	GLYMA_02G238700	sp|Q9LEV3|CBSX3_ARATH	CBS domain-containing protein CBSX3, mitochondrial GN=CBSX3	ident:161/205 pos:185/205 query:205 hit:206 align:206 bit:335.1	OK	CBS domain-containing protein CBSX3, mitochondrial	na	CBSX3_ARATH	Q9LEV3	na	CBSX3	na	Arabidopsis thaliana (Mouse-ear cress)
High	Master Protein	GLYMA_09G019200		PTHR11913:SF22 - ACTIN-DEPOLYMERIZING FACTOR 1-RELATED (1 of 3)	0	45.259	37	3	19	3	139	16	6.57	73.93	3	0	0.454	0.428753	9.97	146	54	61.96	27.95	High	High	High	High	High	High	1		3	3	Present Both	1	GLYMA_09G019200	GLYMA_09G019200	sp|Q9ZSK4|ADF3_ARATH	Actin-depolymerizing factor 3 GN=ADF3	ident:115/139 pos:130/139 query:139 hit:139 align:139 bit:252.7	OK	Actin-depolymerizing factor 3 (ADF-3; AtADF3)	na	ADF3_ARATH	Q9ZSK4	na	ADF3	na	Arabidopsis thaliana (Mouse-ear cress)
High	Master Protein	GLYMA_15G050200		PTHR11937//PTHR11937:SF247 - ACTIN // SUBFAMILY NOT NAMED (1 of 4)	0	192.416	47	16	83	2	377	41.6	5.49	256.31	16	0	0.554	0.722803	6.63	125.4	74.6	25.98	54.78	High	High	High	High	High	High	1		3	3	Present Both	1	GLYMA_15G050200	GLYMA_15G050200	sp|P53496|ACT11_ARATH	Actin-11 GN=ACT11	ident:355/377 pos:369/377 query:377 hit:377 align:377 bit:751.5	OK	Actin-11	na	ACT11_ARATH	P53496	na	ACT11	na	Arabidopsis thaliana (Mouse-ear cress)
High	Master Protein	GLYMA_02G091900		PTHR11937//PTHR11937:SF255 - ACTIN // SUBFAMILY NOT NAMED (1 of 9)	0	197.936	50	18	88	3	377	41.8	5.4	273.42	18	17	0.876	0.996833	36.51	114.5	85.5	31.78	9.85	High	High	High	Peak Found	Not Found	Peak Found	1		3	2	Present Both	1	GLYMA_02G091900	GLYMA_02G091900	sp|P53496|ACT11_ARATH	Actin-11 GN=ACT11	ident:367/377 pos:374/377 query:377 hit:377 align:377 bit:769.2	OK	Actin-11	na	ACT11_ARATH	P53496	na	ACT11	na	Arabidopsis thaliana (Mouse-ear cress)
High	Master Protein	GLYMA_13G335600		PTHR11937//PTHR11937:SF255 - ACTIN // SUBFAMILY NOT NAMED (1 of 9)	0	206.777	53	18	90	1	377	41.7	5.49	283.94	18	0	0.308	0.0774548	14.67	152.9	47.1	102.1		High	Peak Found	Not Found	Not Found	Not Found	Peak Found	1		2	1	Only Control	1	GLYMA_13G335600	GLYMA_13G335600	sp|P53496|ACT11_ARATH	Actin-11 GN=ACT11	ident:363/377 pos:372/377 query:377 hit:377 align:377 bit:763.5	OK	Actin-11	na	ACT11_ARATH	P53496	na	ACT11	na	Arabidopsis thaliana (Mouse-ear cress)
High	Master Protein	GLYMA_15G190500		PTHR11964:SF16 - S-ADENOSYLMETHIONINE SYNTHASE 4 (1 of 5)	0	48.031	20	7	17	7	395	43	5.82	41.64	7	0	0.59	0.785815	33.15	122.2	77.8	54.1	29.49	High	High	High	High	High	High	1		3	3	Present Both	1	GLYMA_15G190500	GLYMA_15G190500	sp|Q9LUT2|METK4_ARATH	S-adenosylmethionine synthase 4 GN=METK4	ident:369/395 pos:381/395 query:395 hit:393 align:392 bit:746.1	OK	S-adenosylmethionine synthase 4 (AdoMet synthase 4)	Methionine adenosyltransferase 4 (MAT 4)	METK4_ARATH	Q9LUT2	Q0WLR3	METK4	MTO3; SAMS3	Arabidopsis thaliana (Mouse-ear cress)
High	Master Protein	GLYMA_09G044200		PTHR11991 - TRANSLATIONALLY CONTROLLED TUMOR PROTEIN-RELATED (1 of 4)	0	30.973	11	1	6	1	168	19	4.73	25.56	1	0	0.211	0.00562822	1.07	165.2	34.8	55.08		High	High	High	Not Found	Not Found	High	1		3	1	Only Control	1	GLYMA_09G044200	GLYMA_09G044200	sp|P31265|TCTP1_ARATH	Translationally-controlled tumor protein 1 GN=TCTP1	ident:128/168 pos:146/168 query:168 hit:168 align:168 bit:267.3	OK	Translationally-controlled tumor protein 1 (TCTP1)	na	TCTP1_ARATH	P31265	Q8L973; Q9LUS0	TCTP1	TXTP	Arabidopsis thaliana (Mouse-ear cress)
High	Master Protein	GLYMA_04G236300		PTHR12356:SF3 - NUCLEAR MIGRATION PROTEIN NUDC (1 of 2)	0	4.059	3	1	6	1	301	34.5	5.85	10.09	1	0	0.391	0.244955	3.88	143.8	56.2	33.31	2.05	High	High	High	High	High	High	1		3	3	Present Both	1	GLYMA_04G236300	GLYMA_04G236300	sp|Q9LV09|BOB1_ARATH	Protein BOBBER 1 GN=BOB1	ident:178/301 pos:205/301 query:301 hit:304 align:284 bit:333.6	OK	Protein BOBBER 1	na	BOB1_ARATH	Q9LV09	Q8LAL5	BOB1	na	Arabidopsis thaliana (Mouse-ear cress)
High	Master Protein	GLYMA_06G027700		PTHR12411//PTHR12411:SF342 - CYSTEINE PROTEASE FAMILY C1-RELATED // SUBFAMILY NOT NAMED (1 of 3)	0	19.352	18	6	9	4	366	40.2	6.19	14.86	6	0	0.01	1.31e-16		200		13.99		High	High	Peak Found	High	High	Not Found	1		3	2	Present Both	1	GLYMA_06G027700	GLYMA_06G027700	sp|P43296|RD19A_ARATH	Cysteine protease RD19A GN=RD19A	ident:259/366 pos:302/366 query:366 hit:368 align:357 bit:550.1	OK	Cysteine protease RD19A	Protein RESPONSIVE TO DEHYDRATION 19 (RD19)	RD19A_ARATH	P43296	Q0WWF3; Q8H7C0; Q8LAT5	RD19A	na	Arabidopsis thaliana (Mouse-ear cress)
High	Master Protein	GLYMA_14G085800		PTHR12411//PTHR12411:SF352 - CYSTEINE PROTEASE FAMILY C1-RELATED // SUBFAMILY NOT NAMED (1 of 3)	0	52.377	17	8	27	2	496	54.4	6.02	76.79	8	0	0.675	0.941361	19.04	134.7	65.3	21.08	30.12	High	High	High	High	High	High	1		3	3	Present Both	1	GLYMA_14G085800	GLYMA_14G085800	sp|P43297|RD21A_ARATH	Cysteine proteinase RD21A GN=RD21A	ident:321/496 pos:382/496 query:496 hit:462 align:455 bit:650.6	OK	Cysteine proteinase RD21A	Protein RESPONSIVE TO DEHYDRATION 21 (RD21)	RD21A_ARATH	P43297	na	RD21A	na	Arabidopsis thaliana (Mouse-ear cress)
High	Master Protein	GLYMA_17G239000		PTHR12411//PTHR12411:SF352 - CYSTEINE PROTEASE FAMILY C1-RELATED // SUBFAMILY NOT NAMED (1 of 3)	0	59.381	19	9	33	3	476	52.1	5.81	90.41	9	6	0.737	0.970114	34.61	128.7	71.3	19.43	15.68	High	High	High	High	High	High	1		3	3	Present Both	1	GLYMA_17G239000	GLYMA_17G239000	sp|P43297|RD21A_ARATH	Cysteine proteinase RD21A GN=RD21A	ident:321/476 pos:380/476 query:476 hit:462 align:460 bit:644.8	OK	Cysteine proteinase RD21A	Protein RESPONSIVE TO DEHYDRATION 21 (RD21)	RD21A_ARATH	P43297	na	RD21A	na	Arabidopsis thaliana (Mouse-ear cress)
High	Master Protein	GLYMA_17G254900		PTHR12411//PTHR12411:SF365 - CYSTEINE PROTEASE FAMILY C1-RELATED // SUBFAMILY NOT NAMED (1 of 3)	0	65.646	18	8	42	6	370	40.4	6.7	102.41	8	2	1.325	0.945815	70.03	60.6	139.4	44.18	35.03	High	High	High	High	High	High	1		3	3	Present Both	1	GLYMA_17G254900	GLYMA_17G254900	sp|P43296|RD19A_ARATH	Cysteine protease RD19A GN=RD19A	ident:251/370 pos:305/370 query:370 hit:368 align:371 bit:535.8	OK	Cysteine protease RD19A	Protein RESPONSIVE TO DEHYDRATION 19 (RD19)	RD19A_ARATH	P43296	Q0WWF3; Q8H7C0; Q8LAT5	RD19A	na	Arabidopsis thaliana (Mouse-ear cress)
High	Master Protein	GLYMA_20G025100		PTHR12611 - PUR-TRANSCRIPTIONAL ACTIVATOR (1 of 2)	0	29.911	18	4	8	4	286	31.6	5.88	21.01	4	0	0.743	0.973817	19.95	161.4	38.6	52.22	82.31	High	High	High	Peak Found	High	High	1		3	3	Present Both	1	GLYMA_20G025100	GLYMA_20G025100	sp|Q9SKZ1|PUR_ARATH	Transcription factor Pur-alpha 1 GN=PURA1	ident:228/286 pos:249/286 query:286 hit:296 align:273 bit:461.1	OK	Transcription factor Pur-alpha 1	Purine-rich single-stranded DNA-binding protein alpha 1	PUR_ARATH	Q9SKZ1	Q8W590; Q9XHC4	PURA1	na	Arabidopsis thaliana (Mouse-ear cress)
High	Master Protein	GLYMA_08G105100		PTHR12612 - NUCLEAR TRANSPORT FACTOR 2 (1 of 5)	0	26.129	35	3	14	3	123	13.6	6.34	32.1	3	0	0.81	0.996833	42.12	119	81	20.09	51.83	High	High	High	High	High	High	1		3	3	Present Both	1	GLYMA_08G105100	GLYMA_08G105100	sp|Q9C7F5|NTF2B_ARATH	Nuclear transport factor 2B GN=NTF2B	ident:105/123 pos:112/123 query:123 hit:126 align:123 bit:224.2	OK	Nuclear transport factor 2B (AtNTF2b; NTF-2)	na	NTF2B_ARATH	Q9C7F5	Q1H566	NTF2B	na	Arabidopsis thaliana (Mouse-ear cress)
High	Master Protein	GLYMA_03G245800		PTHR12760 - TETRATRICOPEPTIDE REPEAT PROTEIN (1 of 2)	0	10.083	5	2	7	2	302	33.9	8.28	18.64	2	0	1.766	0.604979	20.95	75.6	124.4	9.93	7.28	High	Peak Found	Peak Found	High	High	High	1		3	3	Present Both	1	GLYMA_03G245800	GLYMA_03G245800	sp|Q9FJW6|PP451_ARATH	Pentatricopeptide repeat-containing protein At5g67570, chloroplastic GN=DG1	ident:29/302 pos:48/302 query:302 hit:798 align:103 bit:33.1	Partial_match_both	Pentatricopeptide repeat-containing protein At5g67570, chloroplastic	Protein DELAYED GREENING 1; Protein EMBRYO DEFECTIVE 1408	PP451_ARATH	Q9FJW6	Q56WD0	DG1	EMB1408	Arabidopsis thaliana (Mouse-ear cress)
High	Master Protein	GLYMA_13G338700		PTHR12815:SF18 - PROTEIN TOC75-3, CHLOROPLASTIC-RELATED (1 of 2)	0	77.211	16	10	33	10	800	87.5	7.58	108.47	10	0	0.884	0.996833	42.38	116.1	83.9	8.12	3.25	High	High	High	High	High	High	1		3	3	Present Both	1	GLYMA_13G338700	GLYMA_13G338700	sp|Q9STE8|TC753_ARATH	Protein TOC75-3, chloroplastic GN=TOC75-3	ident:587/800 pos:634/800 query:800 hit:818 align:690 bit:1237.2	OK	Protein TOC75-3, chloroplastic	75 kDa translocon at the outer-envelope-membrane of chloroplasts 3 (AtTOC75-III)	TC753_ARATH	Q9STE8	na	TOC75-3	TOC75	Arabidopsis thaliana (Mouse-ear cress)
High	Master Protein	GLYMA_03G242500		PTHR12817 - TRAFFICKING PROTEIN PARTICLE COMPLEX SUBUNIT 6B (1 of 2)	0	5.556	9	1	4	1	181	20.5	6.98	9.04	1	0	1.389	0.892203	21.2	83.7	116.3	20.02		High	Peak Found	Not Found	High	High	High	1		2	3	Present Both	1	GLYMA_03G242500	GLYMA_03G242500	sp|Q39247|2ABB_ARATH	Serine/threonine protein phosphatase 2A 55 kDa regulatory subunit B beta isoform GN=PP2AB2	ident:34/181 pos:64/181 query:181 hit:501 align:141 bit:36.6	Partial_match_hit	Serine/threonine protein phosphatase 2A 55 kDa regulatory subunit B beta isoform (AtB beta; PP2A, subunit B, beta isoform)	na	2ABB_ARATH	Q39247	Q9FZ61	PP2AB2	na	Arabidopsis thaliana (Mouse-ear cress)
High	Master Protein	GLYMA_12G167500		PTHR12883 - ADIPOCYTE-SPECIFIC PROTEIN 4-RELATED (1 of 2)	0	23.828	14	7	17	7	457	50.8	6.34	33.64	7	0	1.427	0.862691	105.64	66.8	133.2	85.39	56.5	High	High	High	High	High	High	1		3	3	Present Both	1	GLYMA_12G167500	GLYMA_12G167500	sp|Q94CC0|Y5994_ARATH	Uncharacterized protein At5g49945 GN=YKT62	ident:274/457 pos:352/457 query:457 hit:480 align:461 bit:520.4	OK	Uncharacterized protein At5g49945	na	Y5994_ARATH	Q94CC0	Q9LTX6	OrderedLocusNames=At5g49945	na	Arabidopsis thaliana (Mouse-ear cress)
High	Master Protein	GLYMA_19G129500		PTHR12917//PTHR12917:SF20 - ASPARTYL PROTEASE DDI-RELATED // SUBFAMILY NOT NAMED (1 of 2)	0	13.29	7	2	6	2	328	36.6	10.02	24.44	2	0	0.816	0.996833	5.85	107.9	92.1	34.9	65.37	High	High	Peak Found	High	High	High	1		3	3	Present Both	1	GLYMA_19G129500	GLYMA_19G129500	sp|Q9LET3|RBL20_ARATH	Rhomboid-like protein 20 GN=RBL20	ident:221/328 pos:255/328 query:328 hit:293 align:328 bit:419.9	OK	Rhomboid-like protein 20 (AtRBL20)	na	RBL20_ARATH	Q9LET3	na	RBL20	na	Arabidopsis thaliana (Mouse-ear cress)
High	Master Protein	GLYMA_09G064500		PTHR12919:SF20 - 28S RIBOSOMAL PROTEIN S16, MITOCHONDRIAL (1 of 2)	0	18.352	37	3	14	1	132	14.8	9.91	33.69	3	0	0.929	0.996833	65.44	103.7	96.3	69.05	12.57	High	Not Found	Peak Found	Peak Found	Not Found	High	1		2	2	Present Both	1	GLYMA_09G064500	GLYMA_09G064500	sp|Q9LTS6|RS16B_ARATH	30S ribosomal protein S16-2, chloroplastic/mitochondrial GN=RPS16-2	ident:101/132 pos:116/132 query:132 hit:135 align:131 bit:212.6	OK	30S ribosomal protein S16-2, chloroplastic/mitochondrial	na	RS16B_ARATH	Q9LTS6	Q8LDI6	RPS16-2	na	Arabidopsis thaliana (Mouse-ear cress)
High	Master Protein	GLYMA_09G091000		PTHR12964 - NADH-UBIQUINONE OXIDOREDUCTASE B14 SUBUNIT (1 of 3)	0	56.367	39	6	45	1	150	17.1	7.81	106.18	6	0	0.648	0.886443	28.3	121.2	78.8	43.28	58.27	High	High	High	High	High	High	1		3	3	Present Both	1	GLYMA_09G091000	GLYMA_09G091000	sp|Q9LHI0|NDUA6_ARATH	NADH dehydrogenase [ubiquinone] 1 alpha subcomplex subunit 6 GN=NDC80	ident:44/150 pos:58/150 query:150 hit:133 align:70 bit:102.4	Partial_match_query	NADH dehydrogenase [ubiquinone] 1 alpha subcomplex subunit 6	na	NDUA6_ARATH	Q9LHI0	na	OrderedLocusNames=At3g12260	na	Arabidopsis thaliana (Mouse-ear cress)
High	Master Protein	GLYMA_06G030700		PTHR13061//PTHR13061:SF10 - DYNACTIN SUBUNIT P25 // SUBFAMILY NOT NAMED (1 of 1)	0	192.864	71	15	108	7	273	29.6	6.15	391.65	15	0	1.044	0.996833	42.95	88.5	111.5	20.43	29.5	High	High	High	High	High	High	1		3	3	Present Both	1	GLYMA_06G030700	GLYMA_06G030700	sp|Q9C6B3|GCA2_ARATH	Gamma carbonic anhydrase 2, mitochondrial GN=GAMMACA2	ident:217/273 pos:250/273 query:273 hit:278 align:264 bit:470.7	OK	Gamma carbonic anhydrase 2, mitochondrial (AtCA2; GAMMA CA2)	Transcription factor APFI	GCA2_ARATH	Q9C6B3	Q9C5S7	GAMMACA2	APFI	Arabidopsis thaliana (Mouse-ear cress)
High	Master Protein	GLYMA_11G070900		PTHR13061//PTHR13061:SF9 - DYNACTIN SUBUNIT P25 // SUBFAMILY NOT NAMED (1 of 4)	0	90.478	40	8	47	8	270	29.2	6.86	150.22	8	0	1.466	0.842018	35.92	81.8	118.2	19.08	9.01	High	High	High	High	High	High	1		3	3	Present Both	1	GLYMA_11G070900	GLYMA_11G070900	sp|Q9FWR5|GCA1_ARATH	Gamma carbonic anhydrase 1, mitochondrial GN=GAMMACA1	ident:209/270 pos:233/270 query:270 hit:275 align:269 bit:432.9	OK	Gamma carbonic anhydrase 1, mitochondrial (AtCA1; GAMMA CA1)	na	GCA1_ARATH	Q9FWR5	Q67XH5; Q682H9; Q8LF67; Q9LN36	GAMMACA1	na	Arabidopsis thaliana (Mouse-ear cress)
High	Master Protein	GLYMA_05G204300		PTHR13061:SF0 - GAMMA CARBONIC ANHYDRASE-LIKE 1, MITOCHONDRIAL-RELATED (1 of 2)	0	95.03	38	7	50	7	253	27.7	8.18	159.86	7	0	0.964	0.997696	71.09	135.6	64.4	52.1	67.27	High	High	High	High	High	High	1		3	3	Present Both	1	GLYMA_05G204300	GLYMA_05G204300	sp|Q9FMV1|GCAL1_ARATH	Gamma carbonic anhydrase-like 1, mitochondrial GN=GAMMACAL1	ident:198/253 pos:215/253 query:253 hit:252 align:247 bit:400.6	OK	Gamma carbonic anhydrase-like 1, mitochondrial (AtCAL1; GAMMA CAL1)	na	GCAL1_ARATH	Q9FMV1	Q8LBM1; Q93XY3	GAMMACAL1	na	Arabidopsis thaliana (Mouse-ear cress)
High	Master Protein	GLYMA_07G091500		PTHR13094 - NADH-UBIQUINONE OXIDOREDUCTASE PDSW SUBUNIT (1 of 2)	0	29.962	43	6	36	6	106	12.5	8.02	93.73	6	0	2.296	0.252213	95.8	37.2	162.8	96.74	29.94	High	High	High	High	High	High	1		3	3	Present Both	1	GLYMA_07G091500	GLYMA_07G091500	sp|Q94C12|NDBAB_ARATH	NADH dehydrogenase [ubiquinone] 1 beta subcomplex subunit 10-B GN=NDC1	ident:84/106 pos:93/106 query:106 hit:106 align:106 bit:177.6	OK	NADH dehydrogenase [ubiquinone] 1 beta subcomplex subunit 10-B	na	NDBAB_ARATH	Q94C12	Q9LS49	OrderedLocusNames=At3g18410	na	Arabidopsis thaliana (Mouse-ear cress)
High	Master Protein	GLYMA_13G107400		PTHR13140:SF390 - MYOSIN-11-RELATED (1 of 5)	0	30.17	5	6	11	6	1530	173.1	8.47	22.09	6	0	0.845	0.996833	46.82	142.3	57.7	14.05	72.49	High	High	High	High	High	Peak Found	1		3	3	Present Both	1	GLYMA_13G107400	GLYMA_13G107400	sp|F4K5J1|MYO17_ARATH	Myosin-17 GN=XI-K	ident:1272/1530 pos:1397/1530 query:1530 hit:1531 align:1530 bit:2654.4	OK	Myosin-17	Myosin XI K (AtXIK)	MYO17_ARATH	F4K5J1	E9N630; F4K5J2; K9KY88; Q0WQJ2	XI-K	XIK	Arabidopsis thaliana (Mouse-ear cress)
High	Master Protein	GLYMA_08G010100		PTHR13169:SF3 - MEMBRANE-ANCHORED UBIQUITIN-FOLD PROTEIN 3 (1 of 2)	0	9.536	18	2	8	2	124	13.8	8.91	18.96	2	0	1.38	0.903415	49.74	76.9	123.1	45.63	32.17	High	High	High	High	High	High	1		3	3	Present Both	1	GLYMA_08G010100	GLYMA_08G010100	sp|Q9SW27|MUB3_ARATH	Membrane-anchored ubiquitin-fold protein 3 GN=MUB3	ident:84/124 pos:93/124 query:124 hit:118 align:105 bit:176.4	OK	Membrane-anchored ubiquitin-fold protein 3 (AtMUB3; Membrane-anchored ub-fold protein 3)	ATGP4	MUB3_ARATH	Q9SW27	Q9ZRD4	MUB3	na	Arabidopsis thaliana (Mouse-ear cress)
High	Master Protein	GLYMA_14G029500		PTHR13228 - CONSERVED OLIGOMERIC GOLGI COMPLEX COMPONENT 5 (1 of 2)	0	9.038	3	2	9	2	833	91.4	7.3	23.46	2	0	0.751	0.977957	40.06	103	97	73.82	24.7	High	High	High	High	High	High	1		3	3	Present Both	1	GLYMA_14G029500	GLYMA_14G029500	sp|O23372|ATXR3_ARATH	Histone-lysine N-methyltransferase ATXR3 GN=ATXR3	ident:30/833 pos:46/833 query:833 hit:2335 align:100 bit:35.0	Partial_match_both	Histone-lysine N-methyltransferase ATXR3	Protein SET DOMAIN GROUP 2; Trithorax-related protein 3 (TRX-related protein 3)	ATXR3_ARATH	O23372	Q0WVL9	ATXR3	SDG2; SET2	Arabidopsis thaliana (Mouse-ear cress)
High	Master Protein	GLYMA_10G143500		PTHR13683//PTHR13683:SF312 - ASPARTYL PROTEASES // SUBFAMILY NOT NAMED (1 of 5)	0	57.325	17	6	25	5	516	56.9	6.95	73.1	6	2	0.591	0.786682	28.55	145.5	54.5	37.45	52.88	High	High	High	High	High	High	1		3	3	Present Both	1	GLYMA_10G143500	GLYMA_10G143500	sp|O65390|APA1_ARATH	Aspartic proteinase A1 GN=APA1	ident:298/516 pos:363/516 query:516 hit:506 align:494 bit:604.7	OK	Aspartic proteinase A1	na	APA1_ARATH	O65390	Q38934	APA1	PRA1	Arabidopsis thaliana (Mouse-ear cress)
High	Master Protein	GLYMA_19G225500		PTHR13683//PTHR13683:SF312 - ASPARTYL PROTEASES // SUBFAMILY NOT NAMED (1 of 5)	0	27.698	8	3	14	2	508	55.5	6.73	47.72	3	0	0.737	0.970114	35.64	151.7	48.3	43.77	12.27	High	High	High	High	High	High	1		3	3	Present Both	1	GLYMA_19G225500	GLYMA_19G225500	sp|O65390|APA1_ARATH	Aspartic proteinase A1 GN=APA1	ident:298/508 pos:363/508 query:508 hit:506 align:505 bit:609.4	OK	Aspartic proteinase A1	na	APA1_ARATH	O65390	Q38934	APA1	PRA1	Arabidopsis thaliana (Mouse-ear cress)
High	Master Protein	GLYMA_15G234300		PTHR13683:SF258 - ASPARTYL PROTEASE FAMILY PROTEIN-RELATED (1 of 4)	0	5.254	3	1	6	1	429	46.2	8.75	14.57	1	0	0.819	0.996833	32.01	111.9	88.1	41.8	24.54	High	High	Peak Found	High	High	High	1		3	3	Present Both	1	GLYMA_15G234300	GLYMA_15G234300	sp|O04496|AED3_ARATH	Aspartyl protease AED3 GN=AED3	ident:197/429 pos:269/429 query:429 hit:449 align:419 bit:361.7	Poor_match	Aspartyl protease AED3	Apoplastic EDS1-dependent protein 3	AED3_ARATH	O04496	Q94K53	AED3	na	Arabidopsis thaliana (Mouse-ear cress)
High	Master Protein	GLYMA_13G345200		PTHR13690:SF80 - TRANSCRIPTION FACTOR POSF21-RELATED (1 of 4)	0	32.407	9	3	10	3	428	46.9	6.81	31.05	3	0	0.975	0.996833	25.15	93.7	106.3	49.18	17.58	High	High	High	High	High	High	1		3	3	Present Both	1	GLYMA_13G345200	GLYMA_13G345200	sp|Q04088|POF21_ARATH	Probable transcription factor PosF21 GN=POSF21	ident:243/428 pos:274/428 query:428 hit:398 align:378 bit:431.4	OK	Probable transcription factor PosF21	bZIP transcription factor 59 (AtbZIP59)	POF21_ARATH	Q04088	Q27GL1; Q3EBQ8	POSF21	BZIP59	Arabidopsis thaliana (Mouse-ear cress)
High	Master Protein	GLYMA_08G288900		PTHR13833:SF46 - NHL DOMAIN-CONTAINING PROTEIN (1 of 3)	0	15.444	6	2	7	2	400	44.1	8.41	26.66	2	0	1.972	0.446791	23.88	65.4	134.6	17.69	12.12	High	High	High	High	High	High	1		3	3	Present Both	1	GLYMA_08G288900	GLYMA_08G288900	sp|Q9C7X1|SOQ1_ARATH	Protein SUPPRESSOR OF QUENCHING 1, chloroplastic GN=SOQ1	ident:28/400 pos:40/400 query:400 hit:1055 align:87 bit:41.2	Partial_match_both	Protein SUPPRESSOR OF QUENCHING 1, chloroplastic	na	SOQ1_ARATH	Q8VZ10	A0A1P8APV3; A0A1P8APY8; C0Z278; Q0WQ65; Q8GX08; Q8L9X3; Q9C7X1	SOQ1	na	Arabidopsis thaliana (Mouse-ear cress)
High	Master Protein	GLYMA_10G280800		PTHR14154:SF3 - MITOCHONDRIAL PYRUVATE CARRIER 1 (1 of 5)	0	23.793	31	3	19	3	107	12	8.94	38.26	3	0	1.144	0.996833	55.43	104.8	95.2	11.04	31.75	High	High	High	High	High	High	1		3	3	Present Both	1	GLYMA_10G280800	GLYMA_10G280800	sp|Q949R9|MPC1_ARATH	Mitochondrial pyruvate carrier 1 GN=MPC1	ident:86/107 pos:92/107 query:107 hit:110 align:102 bit:190.3	OK	Mitochondrial pyruvate carrier 1 (AtMPC1)	na	MPC1_ARATH	Q949R9	na	MPC1	na	Arabidopsis thaliana (Mouse-ear cress)
High	Master Protein	GLYMA_11G135900		PTHR14194:SF38 - PROTEIN PLASTID TRANSCRIPTIONALLY ACTIVE 16 (1 of 2)	0	8.044	4	1	1	1	516	55.5	8.65	4.27	1	0	0.01	1.31e-16		200				High	Not Found	Not Found	Not Found	Not Found	Not Found	1		1	0	Missing Both	1	GLYMA_11G135900	GLYMA_11G135900	sp|Q9STF2|PTA16_ARATH	Protein PLASTID TRANSCRIPTIONALLY ACTIVE 16, chloroplastic GN=PTAC16	ident:333/516 pos:414/516 query:516 hit:510 align:522 bit:591.3	OK	Protein PLASTID TRANSCRIPTIONALLY ACTIVE 16, chloroplastic (pTAC16)	na	PTA16_ARATH	Q9STF2	Q9ASP7	PTAC16	na	Arabidopsis thaliana (Mouse-ear cress)
High	Master Protein	GLYMA_17G002300		PTHR15082 - NADH-UBIQUINONE OXIDOREDUCTASE B12 SUBUNIT (1 of 1)	0	20.632	50	3	11	3	84	9.5	9.99	27.92	3	0	1.258	0.970114	130.08	61	139	88.2	89.01	High	High	High	High	High	High	1		3	3	Present Both	1	GLYMA_17G002300	GLYMA_17G002300	sp|Q9M9R9|NDB3B_ARATH	NADH dehydrogenase [ubiquinone] 1 beta subcomplex subunit 3-B GN=NDB1	ident:41/84 pos:46/84 query:84 hit:73 align:58 bit:93.6	Poor_match	NADH dehydrogenase [ubiquinone] 1 beta subcomplex subunit 3-B	na	NDB3B_ARATH	Q9M9R9	na	OrderedLocusNames=At1g14450	na	Arabidopsis thaliana (Mouse-ear cress)
High	Master Protein	GLYMA_05G092300		PTHR15184:SF3 - ATP SYNTHASE SUBUNIT ALPHA, MITOCHONDRIAL (1 of 2)	0	28.605	12	3	20	3	275	30.4	8.59	54.1	3	0	1.071	0.996833	65.83	103.6	96.4	9.55	33.58	High	High	High	High	High	High	1		3	3	Present Both	1	GLYMA_05G092300	GLYMA_05G092300	sp|P92549|ATPAM_ARATH	ATP synthase subunit alpha, mitochondrial GN=ATPA	ident:228/275 pos:246/275 query:275 hit:507 align:270 bit:469.2	OK	ATP synthase subunit alpha, mitochondrial	na	ATPAM_ARATH	P92549	Q1NZ05; Q8S890	ATPA	ATP1	Arabidopsis thaliana (Mouse-ear cress)
High	Master Protein	GLYMA_17G261600		PTHR15204//PTHR15204:SF1 - SCYTHE/BAT3 // SUBFAMILY NOT NAMED (1 of 2)	0	28.824	6	4	13	1	940	98.7	5.43	39.97	4	3	0.682	0.945815	21.44	101.7	98.3	16.76	21.77	High	High	Peak Found	High	High	Peak Found	1		3	3	Present Both	1	GLYMA_17G261600	GLYMA_17G261600	sp|Q9M1P9|RL40B_ARATH	Ubiquitin-60S ribosomal protein L40-2 GN=RPL40B	ident:28/940 pos:46/940 query:940 hit:128 align:72 bit:58.2	Partial_match_query	60S ribosomal protein L40-2	Protein EARLY-RESPONSIVE TO DEHYDRATION 16; Protein EMBRYO DEFECTIVE 2167; Protein HAPLESS 4; CEP52	RL40B_ARATH	Q42202	O80715; P19232; P59263; Q38875; Q9LDJ2; Q9LYW1; Q9M0W3; Q9M1P9; Q9S7X3	RPL40B	EMB2167; ERD16; HAP4; UBQ1	Arabidopsis thaliana (Mouse-ear cress)
High	Master Protein	GLYMA_11G012700		PTHR17130 - MITOCHONDRIAL OUTER MEMBRANE PROTEIN 25 (1 of 14)	0	4.172	5	1	1	1	360	38.8	9.72	2.47	1	0	0.275	0.0386778	0	156.9	43.1			High	Not Found	Not Found	Not Found	Not Found	Peak Found	1		1	1	Missing Both	1	GLYMA_11G012700	GLYMA_11G012700	sp|Q94BS2|MET1_ARATH	Protein MET1, chloroplastic GN=MET1	ident:26/360 pos:39/360 query:360 hit:335 align:67 bit:50.8	Partial_match_both	Protein MET1, chloroplastic	PDZ domain, K-box domain, and TPR region containing protein	MET1_ARATH	Q94BS2	Q8L972; Q9ZVU6	MET1	na	Arabidopsis thaliana (Mouse-ear cress)
High	Master Protein	GLYMA_04G099900		PTHR18860//PTHR18860:SF26 - 14-3-3 PROTEIN // SUBFAMILY NOT NAMED (1 of 5)	0	39.178	19	5	18	1	288	32.4	4.77	50.73	5	2	0.81	0.996833	39.42	93.5	106.5	55.09	41.87	High	High	High	High	High	High	1		3	3	Present Both	1	GLYMA_04G099900	GLYMA_04G099900	sp|Q01525|14332_ARATH	14-3-3-like protein GF14 omega GN=GRF2	ident:230/288 pos:240/288 query:288 hit:259 align:280 bit:453.4	OK	14-3-3-like protein GF14 omega	General regulatory factor 2	14332_ARATH	Q01525	na	GRF2	GF14	Arabidopsis thaliana (Mouse-ear cress)
High	Master Protein	GLYMA_14G176900		PTHR18860//PTHR18860:SF26 - 14-3-3 PROTEIN // SUBFAMILY NOT NAMED (1 of 5)	0	39.121	17	5	23	2	314	35.2	4.81	59.44	5	1	0.835	0.996833	24.27	106.3	93.7	7.29	10.42	High	High	High	High	High	High	1		3	3	Present Both	1	GLYMA_14G176900	GLYMA_14G176900	sp|Q01525|14332_ARATH	14-3-3-like protein GF14 omega GN=GRF2	ident:226/314 pos:240/314 query:314 hit:259 align:257 bit:463.4	OK	14-3-3-like protein GF14 omega	General regulatory factor 2	14332_ARATH	Q01525	na	GRF2	GF14	Arabidopsis thaliana (Mouse-ear cress)
High	Master Protein	GLYMA_12G210400		PTHR18860//PTHR18860:SF31 - 14-3-3 PROTEIN // SUBFAMILY NOT NAMED (1 of 7)	0	16.224	15	5	17	3	261	29.4	4.78	30.36	5	2	1.041	0.996833	38.2	100.2	99.8	12.52	39.65	High	High	High	High	High	High	1		3	3	Present Both	1	GLYMA_12G210400	GLYMA_12G210400	sp|Q96299|14339_ARATH	14-3-3-like protein GF14 mu GN=GRF9	ident:216/261 pos:243/261 query:261 hit:263 align:263 bit:448.7	OK	14-3-3-like protein GF14 mu	General regulatory factor 9	14339_ARATH	Q96299	O80367	GRF9	na	Arabidopsis thaliana (Mouse-ear cress)
High	Master Protein	GLYMA_08G363800		PTHR18860:SF27 - 14-3-3-LIKE PROTEIN GF14 LAMBDA (1 of 4)	0	32.864	20	5	15	1	260	29.4	4.87	33.11	5	0	0.673	0.941315	8.6	119.5	80.5		17.95	High	High	High	Not Found	Peak Found	Peak Found	1		3	2	Present Both	1	GLYMA_08G363800	GLYMA_08G363800	sp|Q96300|14337_ARATH	14-3-3-like protein GF14 nu GN=GRF7	ident:218/260 pos:231/260 query:260 hit:265 align:237 bit:451.1	OK	14-3-3-like protein GF14 nu	General regulatory factor 7	14337_ARATH	Q96300	na	GRF7	na	Arabidopsis thaliana (Mouse-ear cress)
High	Master Protein	GLYMA_11G233700		PTHR18866//PTHR18866:SF99 - CARBOXYLASE:PYRUVATE/ACETYL-COA/PROPIONYL-COA CARBOXYLASE // SUBFAMILY NOT NAMED (1 of 4)	0	13.036	9	1	2	1	297	32	8.9	6.74	1	0	0.264	0.030089	3.54	158.2	41.8	17.28	38.52	High	High	Peak Found	Peak Found	Peak Found	Peak Found	1		3	3	Present Both	1	GLYMA_11G233700	GLYMA_11G233700	sp|Q9LLC1|BCCP2_ARATH	Biotin carboxyl carrier protein of acetyl-CoA carboxylase 2, chloroplastic GN=BCCP2	ident:46/297 pos:89/297 query:297 hit:255 align:177 bit:54.7	Poor_match	Biotin carboxyl carrier protein of acetyl-CoA carboxylase 2, chloroplastic (AtBCCP2; BCCP-2)	na	BCCP2_ARATH	Q9LLC1	Q9LF29	BCCP2	na	Arabidopsis thaliana (Mouse-ear cress)
High	Master Protein	GLYMA_13G364900		PTHR18896//PTHR18896:SF63 - PHOSPHOLIPASE D // SUBFAMILY NOT NAMED (1 of 1)	0	68.732	15	9	36	6	807	92	6.34	112.67	9	0	0.691	0.945815	27.23	135.1	64.9	24.41	42.81	High	High	High	High	High	High	1		3	3	Present Both	1	GLYMA_13G364900	GLYMA_13G364900	sp|Q38882|PLDA1_ARATH	Phospholipase D alpha 1 GN=PLDALPHA1	ident:653/807 pos:734/807 query:807 hit:810 align:810 bit:1394.0	OK	Phospholipase D alpha 1 (AtPLDalpha1; PLD alpha 1)	Choline phosphatase 1; PLDalpha; Phosphatidylcholine-hydrolyzing phospholipase D 1	PLDA1_ARATH	Q38882	Q0WV84; Q944M4; Q9LW06	PLDALPHA1	PLD1	Arabidopsis thaliana (Mouse-ear cress)
High	Master Protein	GLYMA_14G027900		PTHR18937//PTHR18937:SF242 - STRUCTURAL MAINTENANCE OF CHROMOSOMES SMC FAMILY MEMBER // SUBFAMILY NOT NAMED (1 of 2)	0	88.235	46	18	59	7	313	35	5.07	150.13	18	9	0.923	0.996833	70.13	58.3	141.7	98.45	57.02	High	High	High	High	High	High	1		3	3	Present Both	1	GLYMA_14G027900	GLYMA_14G027900	sp|Q9SHJ6|PMD2_ARATH	Peroxisomal and mitochondrial division factor 2 GN=PMD2	ident:109/313 pos:175/313 query:313 hit:323 align:264 bit:159.8	Poor_match	Peroxisomal and mitochondrial division factor 2	Ubiquitin-interacting factor 7	PMD2_ARATH	Q9SHJ6	A6XH03	PMD2	na	Arabidopsis thaliana (Mouse-ear cress)
High	Master Protein	GLYMA_10G211000		PTHR19139:SF167 - AQUAPORIN PIP2-1-RELATED (1 of 8)	0	10.802	8	1	2	1	296	31.7	7.85	8.25	1	0	0.191	0.00245997	0.63	168	32	17.67	18.65	High	High	Not Found	Not Found	Peak Found	Peak Found	1		2	2	Present Both	1	GLYMA_10G211000	GLYMA_10G211000	sp|P43287|PIP22_ARATH	Aquaporin PIP2-2 GN=PIP2-2	ident:240/296 pos:257/296 query:296 hit:285 align:283 bit:493.8	OK	Aquaporin PIP2-2	Plasma membrane intrinsic protein 2-2 (AtPIP2;2); Plasma membrane intrinsic protein 2b (PIP2b); TMP2b	PIP22_ARATH	P43287	Q8L5U5; Q9SKR8	PIP2-2	PIP2B	Arabidopsis thaliana (Mouse-ear cress)
High	Master Protein	GLYMA_13G361900		PTHR19241:SF219 - ABC TRANSPORTER G FAMILY MEMBER 38 (1 of 22)	0	19.334	3	5	18	3	1426	160.8	7.72	37.66	5	0	1.006	0.996833	76.55	94.9	105.1	70.83	14.45	High	High	High	High	High	High	1	Acetyl [N-Term]	3	3	Present Both	1	GLYMA_13G361900	GLYMA_13G361900	sp|Q9M9E1|AB40G_ARATH	ABC transporter G family member 40 GN=ABCG40	ident:1041/1426 pos:1230/1426 query:1426 hit:1423 align:1433 bit:2241.5	OK	ABC transporter G family member 40 (ABC transporter ABCG.40; AtABCG40)	Pleiotropic drug resistance protein 12	AB40G_ARATH	Q9M9E1	na	ABCG40	na	Arabidopsis thaliana (Mouse-ear cress)
High	Master Protein	GLYMA_08G201300		PTHR19241:SF246 - ABC TRANSPORTER G FAMILY MEMBER 29 (1 of 4)	0	56.495	8	9	29	2	1482	167.7	7.93	63.3	9	0	1.455	0.851648	117.94	141.5	58.5	32.87	132.82	High	Peak Found	High	Peak Found	Not Found	Peak Found	1		3	2	Present Both	1	GLYMA_08G201300	GLYMA_08G201300	sp|Q9XIE2|AB36G_ARATH	ABC transporter G family member 36 GN=ABCG36	ident:1087/1482 pos:1253/1482 query:1482 hit:1469 align:1466 bit:2241.5	OK	ABC transporter G family member 36 (ABC transporter ABCG.36; AtABCG36)	Pleiotropic drug resistance protein 8; Protein PENETRATION 3	AB36G_ARATH	Q9XIE2	Q8VXW5	ABCG36	PDR8; PEN3	Arabidopsis thaliana (Mouse-ear cress)
High	Master Protein	GLYMA_14G103800		PTHR19315:SF9 - ER MEMBRANE PROTEIN COMPLEX SUBUNIT 4 (1 of 2)	0	18.857	11	3	13	1	220	24.2	9.22	33.88	3	0	1.121	0.996833	61.71	94.3	105.7	57.14	16.16	High	High	Peak Found	High	Peak Found	High	1		3	3	Present Both	1	GLYMA_14G103800	GLYMA_14G103800	sp|F4KGE8|GIL1_ARATH	Protein GRAVITROPIC IN THE LIGHT 1 GN=GIL1	ident:22/220 pos:34/220 query:220 hit:559 align:79 bit:31.6	Partial_match_both	Protein GRAVITROPIC IN THE LIGHT 1	na	GIL1_ARATH	F4KGE8	Q8GWZ0; Q9FIL5	GIL1	na	Arabidopsis thaliana (Mouse-ear cress)
High	Master Protein	GLYMA_17G222100		PTHR19315:SF9 - ER MEMBRANE PROTEIN COMPLEX SUBUNIT 4 (1 of 2)	0	21.296	20	4	17	2	178	19.3	7.4	38.01	4	2	0.995	0.996833	44.87	93.6	106.4	10.21	11.56	High	High	High	High	High	High	1		3	3	Present Both	1	GLYMA_17G222100	GLYMA_17G222100	sp|Q9C9J0|LHTL5_ARATH	Lysine histidine transporter-like 5 GN=LHT2	ident:18/178 pos:25/178 query:178 hit:448 align:49 bit:29.3	Partial_match_both	Lysine histidine transporter-like 5	na	LHTL5_ARATH	Q9C9J0	Q9M9H9	OrderedLocusNames=At1g71680	na	Arabidopsis thaliana (Mouse-ear cress)
High	Master Protein	GLYMA_16G002500		PTHR19375//PTHR19375:SF147 - HEAT SHOCK PROTEIN 70KDA // SUBFAMILY NOT NAMED (1 of 3)	0	9.213	6	4	13	4	689	73.7	5.34	16.39	4	0	0.87	0.996833	31.19	95.4	104.6	12.74	28.68	High	High	High	High	High	High	1		3	3	Present Both	1	GLYMA_16G002500	GLYMA_16G002500	sp|Q9LTX9|HSP7G_ARATH	Heat shock 70 kDa protein 7, chloroplastic GN=HSP70-7	ident:596/689 pos:645/689 query:689 hit:718 align:719 bit:1166.0	OK	Heat shock 70 kDa protein 7, chloroplastic	Chloroplast heat shock protein 70-2 (cpHsc70-2); Heat shock protein 70-7 (AtHsp70-7)	HSP7G_ARATH	Q9LTX9	Q8RXD1; Q9M637	HSP70-7	CPHSC70-2; HSC70-7	Arabidopsis thaliana (Mouse-ear cress)
High	Master Protein	GLYMA_03G171100		PTHR19375//PTHR19375:SF200 - HEAT SHOCK PROTEIN 70KDA // SUBFAMILY NOT NAMED (1 of 1)	0	370.131	39	29	178	1	653	71.4	5.16	562.92	29	0	1.593	0.747847	17.55	75	125	16.94	9.07	High	High	Peak Found	High	High	Not Found	1		3	2	Present Both	1	GLYMA_03G171100	GLYMA_03G171100	sp|P22953|MD37E_ARATH	Probable mediator of RNA polymerase II transcription subunit 37e GN=MED37E	ident:601/653 pos:624/653 query:653 hit:651 align:653 bit:1228.0	OK	Probable mediator of RNA polymerase II transcription subunit 37e	Heat shock 70 kDa protein 1; Heat shock cognate 70 kDa protein 1; Heat shock cognate protein 70-1 (AtHsc70-1); Heat shock protein 70-1 (AtHsp70-1); Protein EARLY-RESPONSIVE TO DEHYDRATION 2	MD37E_ARATH	P22953	Q93VU6; Q9LZ52	MED37E	ERD2; HSC70-1; HSP70-1; MED37_4	Arabidopsis thaliana (Mouse-ear cress)
High	Master Protein	GLYMA_11G140500		PTHR19375:SF232 - MEDIATOR OF RNA POLYMERASE II TRANSCRIPTION SUBUNIT 37E-RELATED (1 of 8)	0	165.327	27	16	76	2	649	71	5.21	220.28	16	0	0.01	1.31e-16		200		28.91		High	High	High	Not Found	High	High	1		3	2	Present Both	1	GLYMA_11G140500	GLYMA_11G140500	sp|Q9LHA8|MD37C_ARATH	Probable mediator of RNA polymerase II transcription subunit 37c GN=MED37C	ident:604/649 pos:627/649 query:649 hit:650 align:651 bit:1229.9	OK	Probable mediator of RNA polymerase II transcription subunit 37c	Heat shock 70 kDa protein 4; Heat shock cognate 70 kDa protein 4; Heat shock cognate protein 70-4 (AtHsc70-4); Heat shock protein 70-4 (AtHsp70-4)	MD37C_ARATH	Q9LHA8	Q9ZS55	MED37C	HSC70-4; HSP70; HSP70-4; MED37_2	Arabidopsis thaliana (Mouse-ear cress)
High	Master Protein	GLYMA_13G130900		PTHR19375:SF232 - MEDIATOR OF RNA POLYMERASE II TRANSCRIPTION SUBUNIT 37E-RELATED (1 of 8)	0	245.93	27	20	107	2	632	69.2	5.25	349.11	20	0	0.645	0.879839	9.11	127.1	72.9	42.55	0.98	High	High	Peak Found	Peak Found	Peak Found	Peak Found	1		3	3	Present Both	1	GLYMA_13G130900	GLYMA_13G130900	sp|P22953|MD37E_ARATH	Probable mediator of RNA polymerase II transcription subunit 37e GN=MED37E	ident:586/632 pos:607/632 query:632 hit:651 align:651 bit:1189.9	OK	Probable mediator of RNA polymerase II transcription subunit 37e	Heat shock 70 kDa protein 1; Heat shock cognate 70 kDa protein 1; Heat shock cognate protein 70-1 (AtHsc70-1); Heat shock protein 70-1 (AtHsp70-1); Protein EARLY-RESPONSIVE TO DEHYDRATION 2	MD37E_ARATH	P22953	Q93VU6; Q9LZ52	MED37E	ERD2; HSC70-1; HSP70-1; MED37_4	Arabidopsis thaliana (Mouse-ear cress)
High	Master Protein	GLYMA_02G154700		PTHR19424 - HEAT SHOCK FACTOR BINDING PROTEIN 1 (1 of 3)	0	67.091	74	6	26	6	88	9.7	4.41	76.69	6	0	1.089	0.996833	75.09	97	103	49.45	22.99	High	High	High	High	High	High	1	Acetyl [N-Term]	3	3	Present Both	1	GLYMA_02G154700	GLYMA_02G154700	sp|Q8GW48|HSBP_ARATH	Heat shock factor-binding protein GN=HSBP	ident:62/88 pos:66/88 query:88 hit:86 align:73 bit:130.6	OK	Heat shock factor-binding protein (AtHSBP)	na	HSBP_ARATH	Q8GW48	O23431	HSBP	na	Arabidopsis thaliana (Mouse-ear cress)
High	Master Protein	GLYMA_08G025300		PTHR19959//PTHR19959:SF158 - KINESIN LIGHT CHAIN // SUBFAMILY NOT NAMED (1 of 3)	0	7.753	4	2	6	2	578	63.2	5.41	15.6	2	0	0.671	0.933587	29.53	124.6	75.4	45.57	25.03	High	High	Peak Found	High	High	High	1		3	3	Present Both	1	GLYMA_08G025300	GLYMA_08G025300	sp|O81629|KLCR1_ARATH	Protein KINESIN LIGHT CHAIN-RELATED 1 GN=KLCR1	ident:473/578 pos:527/578 query:578 hit:609 align:609 bit:943.0	OK	Protein KINESIN LIGHT CHAIN-RELATED 1	na	KLCR1_ARATH	O81629	F4JMG6; Q8LCN6	KLCR1	na	Arabidopsis thaliana (Mouse-ear cress)
High	Master Protein	GLYMA_09G173200		PTHR20852//PTHR20852:SF59 - GLUTAMINE SYNTHETASE // SUBFAMILY NOT NAMED (1 of 4)	0	30.999	19	4	11	3	356	39.2	5.39	25.91	4	0	0.424	0.343823	16.17	155.2	44.8	66.36	96.18	High	High	Peak Found	Peak Found	High	High	1		3	3	Present Both	1	GLYMA_09G173200	GLYMA_09G173200	sp|Q56WN1|GLN11_ARATH	Glutamine synthetase cytosolic isozyme 1-1 GN=GLN1-1	ident:312/356 pos:343/356 query:356 hit:356 align:356 bit:670.2	OK	Glutamine synthetase cytosolic isozyme 1-1	Glutamate--ammonia ligase GLN1;1 (GLN1;1)	GLN11_ARATH	Q56WN1	Q9FHR0	GLN1-1	na	Arabidopsis thaliana (Mouse-ear cress)
High	Master Protein	GLYMA_11G215500		PTHR20852//PTHR20852:SF59 - GLUTAMINE SYNTHETASE // SUBFAMILY NOT NAMED (1 of 4)	0	146.333	33	7	53	3	356	39	5.73	199.16	7	7	0.505	0.580584	24.68	176.6	23.4	66.8	86.2	High	High	High	High	High	High	1		3	3	Present Both	1	GLYMA_11G215500	GLYMA_11G215500	sp|Q56WN1|GLN11_ARATH	Glutamine synthetase cytosolic isozyme 1-1 GN=GLN1-1	ident:318/356 pos:346/356 query:356 hit:356 align:356 bit:682.9	OK	Glutamine synthetase cytosolic isozyme 1-1	Glutamate--ammonia ligase GLN1;1 (GLN1;1)	GLN11_ARATH	Q56WN1	Q9FHR0	GLN1-1	na	Arabidopsis thaliana (Mouse-ear cress)
High	Master Protein	GLYMA_18G041100		PTHR20852//PTHR20852:SF59 - GLUTAMINE SYNTHETASE // SUBFAMILY NOT NAMED (1 of 4)	0	132.541	32	6	48	2	356	39.1	5.73	172.44	6	0	0.657	0.90463	53.58	180.6	19.4	74.01	124.76	High	High	High	High	High	High	1		3	3	Present Both	1	GLYMA_18G041100	GLYMA_18G041100	sp|Q9FMD9|GLN14_ARATH	Glutamine synthetase cytosolic isozyme 1-4 GN=GLN1-4	ident:313/356 pos:341/356 query:356 hit:356 align:356 bit:670.6	OK	Glutamine synthetase cytosolic isozyme 1-4	Glutamate--ammonia ligase GLN1;4 (GLN1;4)	GLN14_ARATH	Q9FMD9	na	GLN1-4	na	Arabidopsis thaliana (Mouse-ear cress)
High	Master Protein	GLYMA_04G015300		PTHR21049:SF1 - DOLICHYL-DIPHOSPHOOLIGOSACCHARIDE--PROTEIN GLYCOSYLTRANSFERASE SUBUNIT 1A (1 of 2)	0	45.018	13	11	38	2	619	69	8.34	93.76	11	0	0.862	0.996833	68.5	88.6	111.4	87.6	35.73	High	High	High	High	High	High	1		3	3	Present Both	1	GLYMA_04G015300	GLYMA_04G015300	sp|Q9SFX3|OST1A_ARATH	Dolichyl-diphosphooligosaccharide--protein glycosyltransferase subunit 1A GN=OST1A	ident:408/619 pos:491/619 query:619 hit:614 align:591 bit:847.0	OK	Dolichyl-diphosphooligosaccharide--protein glycosyltransferase subunit 1A	Ribophorin IA (RPN-IA); Ribophorin-1A	OST1A_ARATH	Q9SFX3	Q8H795	OST1A	RPN1A	Arabidopsis thaliana (Mouse-ear cress)
High	Master Protein	GLYMA_13G318200		PTHR21141:SF48 - 60S ACIDIC RIBOSOMAL PROTEIN P2-4 (1 of 2)	0	31.049	48	3	4	3	149	15.3	5.05	15.91	3	0	0.01	1.31e-16		200				High	High	High	Not Found	High	Not Found	1		3	1	Only Control	1	GLYMA_13G318200	GLYMA_13G318200	sp|Q9LXM8|RLA24_ARATH	60S acidic ribosomal protein P2-4 GN=RPP2D	ident:72/149 pos:88/149 query:149 hit:111 align:115 bit:97.1	Poor_match	60S acidic ribosomal protein P2-4	na	RLA24_ARATH	Q9LXM8	na	RPP2D	na	Arabidopsis thaliana (Mouse-ear cress)
High	Master Protein	GLYMA_11G192500		PTHR21368:SF18 - 39S RIBOSOMAL PROTEIN L9, MITOCHONDRIAL (1 of 2)	0	50.666	24	4	6	4	198	22.2	9.89	24.89	4	0	0.01	1.31e-16		200		139.31		High	Peak Found	Not Found	Not Found	Not Found	Not Found	1		2	0	Only Control	1	GLYMA_11G192500	GLYMA_11G192500	sp|P25864|RK9_ARATH	50S ribosomal protein L9, chloroplastic GN=RPL9	ident:146/198 pos:171/198 query:198 hit:197 align:199 bit:269.2	OK	50S ribosomal protein L9, chloroplastic	CL9	RK9_ARATH	P25864	na	RPL9	na	Arabidopsis thaliana (Mouse-ear cress)
High	Master Protein	GLYMA_09G248700		PTHR21397 - NUCLEIC ACID BINGING PROTEIN (1 of 2)	0	67.177	33	9	40	5	296	32.5	6.44	121.01	9	0	1.482	0.826526	52.68	62.5	137.5	68.28	30.54	High	High	High	High	High	High	1		3	3	Present Both	1	GLYMA_09G248700	GLYMA_09G248700	sp|F4IME2|MSL8_ARATH	Mechanosensitive ion channel protein 8 GN=MSL8	ident:20/296 pos:31/296 query:296 hit:908 align:58 bit:28.1	Partial_match_both	Mechanosensitive ion channel protein 8	Mechanosensitive channel of small conductance-like 8; MscS-Like protein 8	MSL8_ARATH	F4IME2	na	MSL8	na	Arabidopsis thaliana (Mouse-ear cress)
High	Master Protein	GLYMA_18G244000		PTHR21397 - NUCLEIC ACID BINGING PROTEIN (1 of 2)	0	63.195	31	9	44	5	297	32.7	6.7	127.83	9	4	1.5	0.817626	66.08	52.7	147.3	72.91	50.18	High	High	High	High	High	High	1		3	3	Present Both	1	GLYMA_18G244000	GLYMA_18G244000	sp|Q1G391|FB217_ARATH	F-box protein At4g00893 GN=FAMT	ident:14/297 pos:16/297 query:297 hit:388 align:23 bit:30.8	Partial_match_both	F-box protein At4g00893	na	FB217_ARATH	Q1G391	na	OrderedLocusNames=At4g00893	na	Arabidopsis thaliana (Mouse-ear cress)
High	Master Protein	GLYMA_11G150300		PTHR21495:SF59 - DIRIGENT PROTEIN 20-RELATED (1 of 6)	0	10.38	10	2	7	2	206	22.7	5.41	14.31	2	0	0.716	0.970114	12.39	116.6	83.4	23.22	10.97	High	High	High	High	High	High	1		3	3	Present Both	1	GLYMA_11G150300	GLYMA_11G150300	sp|Q67YM6|DIR11_ARATH	Dirigent protein 11 GN=DIR11	ident:75/206 pos:102/206 query:206 hit:193 align:160 bit:151.4	Poor_match	Dirigent protein 11 (AtDIR11)	na	DIR11_ARATH	Q67YM6	O23132	DIR11	na	Arabidopsis thaliana (Mouse-ear cress)
High	Master Protein	GLYMA_01G126600		PTHR21495:SF77 - DIRIGENT PROTEIN 19 (1 of 14)	0	22.954	23	3	5	3	191	20.8	8.31	13.19	3	0	0.744	0.973839	19.33	103.7	96.3	40.53		High	High	High	Not Found	Not Found	High	1		3	1	Only Control	1	GLYMA_01G126600	GLYMA_01G126600	sp|Q9C523|DIR19_ARATH	Dirigent protein 19 GN=DIR19	ident:94/191 pos:134/191 query:191 hit:185 align:180 bit:194.5	Poor_match	Dirigent protein 19 (AtDIR19)	na	DIR19_ARATH	Q9C523	na	DIR19	na	Arabidopsis thaliana (Mouse-ear cress)
High	Master Protein	GLYMA_04G001700		PTHR21680:SF0 - COILED-COIL DOMAIN-CONTAINING PROTEIN 124 (1 of 2)	0	15.189	14	3	6	3	229	26.6	8.98	14.7	3	0	0.01	1.31e-16	0.01	121.2	78.8	100.35		High	High	High	Not Found	Not Found	High	1		3	1	Only Control	1	GLYMA_04G001700	GLYMA_04G001700	sp|F4IEY4|TRB5_ARATH	Telomere repeat-binding factor 5 GN=SYP71	ident:29/229 pos:46/229 query:229 hit:287 align:103 bit:35.8	Partial_match_both	Telomere repeat-binding factor 5	MYB transcription factor	TRB5_ARATH	F4IEY4	Q94JU9; Q9CAI8	OrderedLocusNames=At1g72740	na	Arabidopsis thaliana (Mouse-ear cress)
High	Master Protein	GLYMA_02G016400		PTHR22298:SF55 - ENDOGLUCANASE 1-RELATED (1 of 4)	0.001	2.552	2	1	2	1	507	56.6	9.22	2.12	1	0	0.36	0.171977	5.43	147	53	38.43		High	Peak Found	Not Found	High	Not Found	Not Found	1		2	1	Only Control	1	GLYMA_02G016400	GLYMA_02G016400	sp|O81416|GUN17_ARATH	Endoglucanase 17 GN=ESMD1	ident:387/507 pos:430/507 query:507 hit:516 align:469 bit:820.5	OK	Endoglucanase 17	Endo-1,4-beta glucanase 17	GUN17_ARATH	O81416	na	OrderedLocusNames=At4g02290	na	Arabidopsis thaliana (Mouse-ear cress)
High	Master Protein	GLYMA_02G308100		PTHR22811:SF50 - TRANSMEMBRANE EMP24 DOMAIN-CONTAINING PROTEIN P24BETA2 (1 of 4)	0	14.744	14	2	7	2	220	25.4	6.47	21.81	2	0	0.816	0.996833	61.49	113.9	86.1	33.02	24.29	High	High	Peak Found	High	High	High	1		3	3	Present Both	1	GLYMA_02G308100	GLYMA_02G308100	sp|Q9S7M9|P24B2_ARATH	Transmembrane emp24 domain-containing protein p24beta2 GN=PP2A10	ident:153/220 pos:178/220 query:220 hit:208 align:201 bit:332.4	OK	Transmembrane emp24 domain-containing protein p24beta2	p24 family protein beta1 (p24beta1); p24 family protein beta2 (p24beta2)	P24B2_ARATH	Q9S7M9	Q8L987	OrderedLocusNames=At3g07680	na	Arabidopsis thaliana (Mouse-ear cress)
High	Master Protein	GLYMA_11G179300		PTHR22912:SF180 - 3-PHENYLPROPIONATE/CINNAMIC ACID DIOXYGENASE FERREDOXIN--NAD(+) REDUCTASE COMPONENT (1 of 8)	0	345.328	62	31	238	14	360	39.3	9.42	768.26	31	19	0.696	0.946051	31.23	124.2	75.8	12.77	40.17	High	High	High	High	High	High	1		3	3	Present Both	1	GLYMA_11G179300	GLYMA_11G179300	sp|Q8GXR9|NDC1_ARATH	Alternative NAD(P)H-ubiquinone oxidoreductase C1, chloroplastic/mitochondrial GN=NDC1	ident:99/360 pos:165/360 query:360 hit:519 align:381 bit:71.6	Poor_match	Alternative NAD(P)H-ubiquinone oxidoreductase C1, chloroplastic/mitochondrial	Alternative NADH dehydrogenase NDC1; Demethylphylloquinone reductase NDC1; NADH:ubiquinone reductase (non-electrogenic) NDC1	NDC1_ARATH	Q8GXR9	F4KCG9; Q6KC19; Q93ZN8; Q9C5A3	NDC1	na	Arabidopsis thaliana (Mouse-ear cress)
High	Master Protein	GLYMA_12G094100		PTHR22912:SF180 - 3-PHENYLPROPIONATE/CINNAMIC ACID DIOXYGENASE FERREDOXIN--NAD(+) REDUCTASE COMPONENT (1 of 8)	0	255.539	49	23	171	6	360	39.1	9.38	534.67	23	0	1.072	0.996833	96.96	127	73	60.49	80.61	High	High	High	Peak Found	High	High	1		3	3	Present Both	1	GLYMA_12G094100	GLYMA_12G094100	sp|Q8GXR9|NDC1_ARATH	Alternative NAD(P)H-ubiquinone oxidoreductase C1, chloroplastic/mitochondrial GN=NDC1	ident:100/360 pos:160/360 query:360 hit:519 align:381 bit:67.8	Poor_match	Alternative NAD(P)H-ubiquinone oxidoreductase C1, chloroplastic/mitochondrial	Alternative NADH dehydrogenase NDC1; Demethylphylloquinone reductase NDC1; NADH:ubiquinone reductase (non-electrogenic) NDC1	NDC1_ARATH	Q8GXR9	F4KCG9; Q6KC19; Q93ZN8; Q9C5A3	NDC1	na	Arabidopsis thaliana (Mouse-ear cress)
High	Master Protein	GLYMA_19G007800		PTHR22939:SF81 - PROTEASE DO-LIKE 1, CHLOROPLASTIC (1 of 2)	0	7.12	14	3	4	3	431	45.6	7.11	9.05	3	0	0.417	0.320574	3.74	141.2	58.8	9.87	16.31	High	Peak Found	Peak Found	High	High	Peak Found	1		3	3	Present Both	1	GLYMA_19G007800	GLYMA_19G007800	sp|O22609|DEGP1_ARATH	Protease Do-like 1, chloroplastic GN=DEGP1	ident:322/431 pos:344/431 query:431 hit:439 align:360 bit:647.5	OK	Protease Do-like 1, chloroplastic	Protein DEGRADATION OF PERIPLASMIC PROTEINS 1 (DEGP PROTEASE 1)	DEGP1_ARATH	O22609	Q94BX6; Q9LK85	DEGP1	DEG1; DEGP	Arabidopsis thaliana (Mouse-ear cress)
High	Master Protein	GLYMA_11G091700		PTHR23075:SF0 - ATPASE FAMILY AAA DOMAIN-CONTAINING PROTEIN 3 (1 of 2)	0	92.135	19	13	55	10	620	68.7	9.25	140.18	13	3	1.234	0.970114	72.48	68.1	131.9	53.88	26.15	High	High	High	High	High	High	1		3	3	Present Both	1	GLYMA_11G091700	GLYMA_11G091700	sp|Q9SCN8|CD48D_ARATH	Cell division control protein 48 homolog D GN=CDC48D	ident:62/620 pos:106/620 query:620 hit:815 align:213 bit:79.0	Partial_match_both	Cell division control protein 48 homolog D (AtCDC48d)	Transitional endoplasmic reticulum ATPase D	CD48D_ARATH	Q9SCN8	Q0WQA2	CDC48D	na	Arabidopsis thaliana (Mouse-ear cress)
High	Master Protein	GLYMA_01G028900		PTHR23118//PTHR23118:SF9 - ATP-CITRATE SYNTHASE // SUBFAMILY NOT NAMED (1 of 4)	0	11.671	6	1	2	1	423	46.6	5.6	9.09	1	0	0.212	0.00582041	1.68	165.1	34.9	34.72		High	High	Not Found	Not Found	Not Found	Peak Found	1		2	1	Only Control	1	GLYMA_01G028900	GLYMA_01G028900	sp|Q9SGY2|ACLA1_ARATH	ATP-citrate synthase alpha chain protein 1 GN=ACLA-1	ident:382/423 pos:402/423 query:423 hit:423 align:423 bit:794.3	OK	ATP-citrate synthase alpha chain protein 1 (ATP-citrate synthase A-1)	ATP-citrate lyase A-1; Citrate cleavage enzyme A-1	ACLA1_ARATH	Q9SGY2	Q56WG2; Q8LAY1	ACLA-1	na	Arabidopsis thaliana (Mouse-ear cress)
High	Master Protein	GLYMA_07G266300		PTHR23130:SF80 - AUXIN-INDUCED IN ROOT CULTURES PROTEIN 12 (1 of 6)	0	57.063	13	3	17	3	402	43.9	9.2	59.98	3	0	0.547	0.700434	3.88	146	54	44.26	8.9	High	High	High	High	High	High	1		3	3	Present Both	1	GLYMA_07G266300	GLYMA_07G266300	sp|Q9FGK4|B561J_ARATH	Cytochrome b561 and DOMON domain-containing protein At5g47530 GN=AXR4	ident:198/402 pos:262/402 query:402 hit:395 align:363 bit:405.6	Poor_match	Cytochrome b561 and DOMON domain-containing protein At5g47530	Protein b561A.tha10	B561J_ARATH	Q9FGK4	na	OrderedLocusNames=At5g47530	na	Arabidopsis thaliana (Mouse-ear cress)
High	Master Protein	GLYMA_03G088900		PTHR23130:SF95 - AUXIN-RESPONSIVE PROTEIN-RELATED (1 of 3)	0	89.886	33	5	54	5	244	25.6	7.5	230.23	5	0	0.596	0.800649	18.95	129	71	25.17	12.55	High	High	High	High	High	High	1		3	3	Present Both	1	GLYMA_03G088900	GLYMA_03G088900	sp|Q94BT2|AIR12_ARATH	Auxin-induced in root cultures protein 12 GN=AIR12	ident:82/244 pos:117/244 query:244 hit:252 align:213 bit:129.0	Poor_match	Auxin-induced in root cultures protein 12	na	AIR12_ARATH	Q94BT2	F4JEF2; O82442; Q9SRS7	AIR12	na	Arabidopsis thaliana (Mouse-ear cress)
High	Master Protein	GLYMA_18G243500		PTHR23151:SF66 - BIOTIN CARBOXYL CARRIER PROTEIN OF ACETYL-COA CARBOXYLASE 1, CHLOROPLASTIC (1 of 2)	0	24.689	26	4	8	1	262	27.6	9.44	31.1	4	0	0.477	0.50036	7.02	139	61	32.76	16.45	High	High	Peak Found	Peak Found	Peak Found	High	1		3	3	Present Both	1	GLYMA_18G243500	GLYMA_18G243500	sp|Q42533|BCCP1_ARATH	Biotin carboxyl carrier protein of acetyl-CoA carboxylase 1, chloroplastic GN=BCCP1	ident:138/262 pos:168/262 query:262 hit:280 align:248 bit:220.7	OK	Biotin carboxyl carrier protein of acetyl-CoA carboxylase 1, chloroplastic (AtBCCP1; BCCP-1)	na	BCCP1_ARATH	Q42533	O04845; Q9LL78	BCCP1	CAC1	Arabidopsis thaliana (Mouse-ear cress)
High	Master Protein	GLYMA_05G194500		PTHR23172 - AUXILIN/CYCLIN G-ASSOCIATED KINASE-RELATED (1 of 21)	0	58.653	10	8	29	8	983	108	6.86	84.32	8	0	1.005	0.996833	48.98	65.2	134.8	27.74	16.78	High	High	High	High	High	High	1		3	3	Present Both	1	GLYMA_05G194500	GLYMA_05G194500	sp|Q0WQ57|AUXI2_ARATH	Auxilin-related protein 2 GN=BBD2	ident:461/983 pos:578/983 query:983 hit:891 align:976 bit:568.2	Poor_match	Auxilin-related protein 2	na	AUXI2_ARATH	Q0WQ57	Q9SU09	OrderedLocusNames=At4g12770	na	Arabidopsis thaliana (Mouse-ear cress)
Medium	Master Protein	GLYMA_17G203600		PTHR23180//PTHR23180:SF266 - CENTAURIN/ARF // SUBFAMILY NOT NAMED (1 of 2)	0.012	1.791	1	1	1	1	750	81.6	8.32	0	1	0	1.479	0.826583	56.55	80.7	119.3	23.78	48.46	High	Peak Found	Peak Found	Peak Found	Peak Found	Peak Found	1		3	3	Present Both	1	GLYMA_17G203600	GLYMA_17G203600	sp|Q8RXE7|AGD14_ARATH	Probable ADP-ribosylation factor GTPase-activating protein AGD14 GN=AGD14	ident:81/750 pos:100/750 query:750 hit:649 align:126 bit:189.9	Partial_match_both	Probable ADP-ribosylation factor GTPase-activating protein AGD14 (ARF GAP AGD14)	Protein ARF-GAP DOMAIN 14 (AtAGD14); Protein ZIGA4	AGD14_ARATH	Q8RXE7	Q67YQ3; Q9FRR6; Q9FRR7; Q9FVH3	AGD14	ZIG4; ZIGA4	Arabidopsis thaliana (Mouse-ear cress)
High	Master Protein	GLYMA_15G144800		PTHR23316:SF22 - ARMADILLO/BETA-CATENIN-LIKE REPEATS-CONTAINING PROTEIN-RELATED (1 of 4)	0	82.406	20	12	40	7	531	58.6	5.26	102.29	12	5	0.728	0.970114	36.36	113.2	86.8	23.38	38.38	High	High	High	High	High	High	1		3	3	Present Both	1	GLYMA_15G144800	GLYMA_15G144800	sp|F4JL11|IMPA2_ARATH	Importin subunit alpha-2 GN=IMPA2	ident:464/531 pos:493/531 query:531 hit:535 align:534 bit:931.0	OK	Importin subunit alpha-2 (IMPa-2)	na	IMPA2_ARATH	F4JL11	O49600; Q9ASV4	IMPA2	na	Arabidopsis thaliana (Mouse-ear cress)
High	Master Protein	GLYMA_12G001800		PTHR23324:SF48 - PATELLIN-3-RELATED (1 of 8)	0	69.781	25	11	33	7	606	69.5	4.87	87.3	11	4	0.643	0.871961	18.51	121	79	5.48	13.03	High	High	High	High	High	High	1		3	3	Present Both	1	GLYMA_12G001800	GLYMA_12G001800	sp|Q56Z59|PATL3_ARATH	Patellin-3 GN=PATL3	ident:224/606 pos:276/606 query:606 hit:490 align:345 bit:487.3	Poor_match	Patellin-3	na	PATL3_ARATH	Q56Z59	Q94AG3; Q9C7T9	PATL3	na	Arabidopsis thaliana (Mouse-ear cress)
High	Master Protein	GLYMA_02G296400		PTHR23344:SF8 - GLYCEROPHOSPHODIESTER PHOSPHODIESTERASE-LIKE PROTEIN-RELATED (1 of 8)	0	43.807	12	7	17	5	753	81.8	6.2	44.65	7	0	1.21	0.977957	41.71	73.7	126.3	20.91	13.25	High	High	High	High	High	High	1		3	3	Present Both	1	GLYMA_02G296400	GLYMA_02G296400	sp|Q7Y208|GPDL1_ARATH	Glycerophosphodiester phosphodiesterase GDPDL1 GN=GDPDL1	ident:429/753 pos:538/753 query:753 hit:763 align:729 bit:864.0	OK	Glycerophosphodiester phosphodiesterase GDPDL1	Glycerophosphodiester phosphodiesterase-like 1 (ATGDPDL1); Glycerophosphodiesterase-like 3; Protein SHV3-LIKE 2	GPDL1_ARATH	Q7Y208	Q9FZI1	GDPDL1	na	Arabidopsis thaliana (Mouse-ear cress)
High	Master Protein	GLYMA_05G046300		PTHR23359//PTHR23359:SF99 - NUCLEOTIDE KINASE // SUBFAMILY NOT NAMED (1 of 5)	0	360.936	67	27	191	7	242	26.6	7.81	659.39	27	20	0.972	0.996833	50.65	98.7	101.3	16.29	0.68	High	High	High	High	High	High	1		3	3	Present Both	1	GLYMA_05G046300	GLYMA_05G046300	sp|O82514|KAD4_ARATH	Adenylate kinase 4 GN=ADK1	ident:195/242 pos:220/242 query:242 hit:246 align:241 bit:417.9	OK	Adenylate kinase 4 (AK 4)	ATP-AMP transphosphorylase 4; ATP:AMP phosphotransferase; Adenylate monophosphate kinase 4 (AMK4)	KAD4_ARATH	O82514	Q9FMW2	ADK1	na	Arabidopsis thaliana (Mouse-ear cress)
High	Master Protein	GLYMA_17G128300		PTHR23359//PTHR23359:SF99 - NUCLEOTIDE KINASE // SUBFAMILY NOT NAMED (1 of 5)	0	303.844	64	25	149	5	242	26.6	7.81	494.33	25	0	0.93	0.996833	46.44	99.1	100.9	12.91	39.08	High	High	High	High	High	High	1		3	3	Present Both	1	GLYMA_17G128300	GLYMA_17G128300	sp|O82514|KAD4_ARATH	Adenylate kinase 4 GN=ADK1	ident:193/242 pos:216/242 query:242 hit:246 align:241 bit:412.5	OK	Adenylate kinase 4 (AK 4)	ATP-AMP transphosphorylase 4; ATP:AMP phosphotransferase; Adenylate monophosphate kinase 4 (AMK4)	KAD4_ARATH	O82514	Q9FMW2	ADK1	na	Arabidopsis thaliana (Mouse-ear cress)
High	Master Protein	GLYMA_08G343100		PTHR23426:SF30 - ADRENODOXIN-LIKE PROTEIN, MITOCHONDRIAL (1 of 2)	0	31.013	30	4	15	4	158	17.5	7.94	46.01	4	0	0.932	0.996833	39.55	104.3	95.7	10.43	7.17	High	High	High	High	High	High	1		3	3	Present Both	1	GLYMA_08G343100	GLYMA_08G343100	sp|O64948|LONP2_ARATH	Lon protease homolog 2, peroxisomal GN=LON2	ident:30/158 pos:53/158 query:158 hit:888 align:121 bit:33.9	Partial_match_hit	Lon protease homolog 2, peroxisomal	na	LONP2_ARATH	O64948	Q8GT60	LON2	na	Arabidopsis thaliana (Mouse-ear cress)
High	Master Protein	GLYMA_09G065600		PTHR24031//PTHR24031:SF322 - RNA HELICASE // SUBFAMILY NOT NAMED (1 of 2)	0	112.642	43	13	53	1	413	46.8	5.68	164.57	13	6	1.085	0.996833	59.84	95	105	33.71	7.17	High	High	Peak Found	Peak Found	High	Peak Found	1		3	3	Present Both	1	GLYMA_09G065600	GLYMA_09G065600	sp|P41376|IF4A1_ARATH	Eukaryotic initiation factor 4A-1 GN=TIF4A-1	ident:382/413 pos:404/413 query:413 hit:412 align:414 bit:792.0	OK	Eukaryotic initiation factor 4A-1 (eIF-4A-1)	ATP-dependent RNA helicase eIF4A-1; DEAD-box ATP-dependent RNA helicase 4	IF4A1_ARATH	P41376	Q0WWD9; Q546P0; Q8LBZ6; Q8RXF3; Q94CM1	TIF4A-1	RH4	Arabidopsis thaliana (Mouse-ear cress)
Medium	Master Protein	GLYMA_03G226600		PTHR24031:SF155 - DEAD-BOX ATP-DEPENDENT RNA HELICASE 3, CHLOROPLASTIC (1 of 4)	0.011	1.797	1	1	2	1	771	83.9	7.23	0	1	0	0.8	0.996833	32.77	114.4	85.6	36.96	49.01	High	Peak Found	Peak Found	Not Found	High	Peak Found	1		3	2	Present Both	1	GLYMA_03G226600	GLYMA_03G226600	sp|Q8L7S8|RH3_ARATH	DEAD-box ATP-dependent RNA helicase 3, chloroplastic GN=RH3	ident:492/771 pos:565/771 query:771 hit:748 align:661 bit:949.5	OK	DEAD-box ATP-dependent RNA helicase 3, chloroplastic	Protein EMBRYO DEFECTIVE 1138	RH3_ARATH	Q8L7S8	O65255; Q0WMJ9; Q8LPE9; Q8RUW1; Q9SB96	RH3	EMB1138	Arabidopsis thaliana (Mouse-ear cress)
High	Master Protein	GLYMA_15G122300		PTHR24073:SF545 - RAS-RELATED PROTEIN RABB1C (1 of 2)	0	6.23	11	2	4	2	211	23.1	7.42	10.18	2	0	1.128	0.996833	34.6	94	106	42	17.67	High	High	Peak Found	Peak Found	Peak Found	High	1		3	3	Present Both	1	GLYMA_15G122300	GLYMA_15G122300	sp|P92963|RAB1C_ARATH	Ras-related protein RABB1c GN=RABB1C	ident:205/211 pos:207/211 query:211 hit:211 align:210 bit:430.6	OK	Ras-related protein RABB1c (AtRABB1c)	Ras-related protein Rab2A (AtRab2A)	RAB1C_ARATH	P92963	na	RABB1C	RAB2; RAB2A	Arabidopsis thaliana (Mouse-ear cress)
High	Master Protein	GLYMA_11G241000		PTHR24078:SF315 - MOLECULAR CHAPERONE DNAJ (1 of 4)	0.001	2.498	2	1	6	1	440	47.4	9.28	12.1	1	0	0.986	0.996833	37.36	100.7	99.3	21.47	42.26	High	High	High	High	High	Peak Found	1		3	3	Present Both	1	GLYMA_11G241000	GLYMA_11G241000	sp|Q9SJZ7|DNJA6_ARATH	Chaperone protein dnaJ A6, chloroplastic GN=DJA6	ident:326/440 pos:378/440 query:440 hit:442 align:443 bit:655.6	OK	Chaperone protein dnaJ A6, chloroplastic (atDjA6)	Chaperone protein dnaJ A26 (AtDjA26)	DNJA6_ARATH	Q9SJZ7	Q7Y204; Q8LGF3	DJA6	na	Arabidopsis thaliana (Mouse-ear cress)
High	Master Protein	GLYMA_08G115600		PTHR24089:SF266 - MITOCHONDRIAL DICARBOXYLATE/TRICARBOXYLATE TRANSPORTER DTC (1 of 2)	0	72.864	34	10	34	3	301	32	9.35	77.71	10	8	0.992	0.996833	45.49	97.8	102.2	20.85	22.5	High	High	High	High	High	High	1		3	3	Present Both	1	GLYMA_08G115600	GLYMA_08G115600	sp|Q9C5M0|DTC_ARATH	Mitochondrial dicarboxylate/tricarboxylate transporter DTC GN=DTC	ident:252/301 pos:272/301 query:301 hit:298 align:297 bit:527.7	OK	Mitochondrial dicarboxylate/tricarboxylate transporter DTC	Dicarboxylate/tricarboxylate carrier	DTC_ARATH	Q9C5M0	Q8SFL2	DTC	na	Arabidopsis thaliana (Mouse-ear cress)
High	Master Protein	GLYMA_16G050000		PTHR24089:SF269 - MITOCHONDRIAL PHOSPHATE CARRIER PROTEIN 3, MITOCHONDRIAL (1 of 7)	0	52.108	21	6	29	1	372	39.8	9.13	79.57	6	0	1.365	0.920664	25.26	84.6	115.4		48.09	High	High	High	High	High	High	1		3	3	Present Both	1	GLYMA_16G050000	GLYMA_16G050000	sp|Q9FMU6|MPCP3_ARATH	Mitochondrial phosphate carrier protein 3, mitochondrial GN=MPT3	ident:273/372 pos:301/372 query:372 hit:375 align:369 bit:523.5	OK	Mitochondrial phosphate carrier protein 3, mitochondrial	Mitochondrial phosphate transporter 3 (MPT3); Phosphate transporter 3;1	MPCP3_ARATH	Q9FMU6	O80415; Q56WI0	MPT3	AT5; PHT3	Arabidopsis thaliana (Mouse-ear cress)
High	Master Protein	GLYMA_15G273600		PTHR24089:SF316 - ADP,ATP CARRIER PROTEIN 1, MITOCHONDRIAL (1 of 4)	0	304.76	41	26	181	1	389	42.1	9.7	573.95	26	32	1.101	0.996833	54.51	111.1	88.9	14.2	33.66	High	High	High	High	High	High	1		3	3	Present Both	1	GLYMA_15G273600	GLYMA_15G273600	sp|P40941|ADT2_ARATH	ADP,ATP carrier protein 2, mitochondrial GN=AAC2	ident:320/389 pos:348/389 query:389 hit:385 align:393 bit:613.2	OK	ADP,ATP carrier protein 2, mitochondrial	ADP/ATP translocase 2; Adenine nucleotide translocator 2 (ANT 2)	ADT2_ARATH	P40941	Q9FY52	AAC2	ANT2	Arabidopsis thaliana (Mouse-ear cress)
High	Master Protein	GLYMA_06G290600		PTHR24089:SF340 - ADP,ATP CARRIER PROTEIN 3, MITOCHONDRIAL (1 of 2)	0	267.495	40	21	164	2	372	39.7	9.76	502.34	21	2	0.699	0.946051	47	116.4	83.6	25.76	19.61	High	High	High	High	High	High	1	Phospho [S69; D74]	3	3	Present Both	1	GLYMA_06G290600	GLYMA_06G290600	sp|O49447|ADT3_ARATH	ADP,ATP carrier protein 3, mitochondrial GN=AAC3	ident:314/372 pos:340/372 query:372 hit:379 align:378 bit:610.5	OK	ADP,ATP carrier protein 3, mitochondrial	ADP/ATP translocase 3; Adenine nucleotide translocator 3 (ANT 3)	ADT3_ARATH	O49447	Q8L9Y1	AAC3	ANT3	Arabidopsis thaliana (Mouse-ear cress)
High	Master Protein	GLYMA_01G019000		PTHR24089:SF341 - MITOCHONDRIAL CARNITINE/ACYLCARNITINE CARRIER-LIKE PROTEIN (1 of 4)	0	64.822	30	8	28	1	297	30.5	9.55	102.58	8	7	0.586	0.777521	13.44	137.4	62.6	24.83	17.89	High	High	High	High	High	High	1		3	3	Present Both	1	GLYMA_01G019000	GLYMA_01G019000	sp|Q93XM7|MCAT_ARATH	Mitochondrial carnitine/acylcarnitine carrier-like protein GN=BOU	ident:241/297 pos:264/297 query:297 hit:300 align:300 bit:492.3	OK	Mitochondrial carnitine/acylcarnitine carrier-like protein	Carnitine/acylcarnitine translocase-like protein (CAC-like protein); Protein A BOUT DE SOUFFLE	MCAT_ARATH	Q93XM7	Q9FIP5	BOU	na	Arabidopsis thaliana (Mouse-ear cress)
High	Master Protein	GLYMA_09G203900		PTHR24089:SF341 - MITOCHONDRIAL CARNITINE/ACYLCARNITINE CARRIER-LIKE PROTEIN (1 of 4)	0	64.352	30	8	28	1	297	30.4	9.48	104.91	8	0	0.876	0.996833	8.25	106.6	93.4	9.18	13.32	High	High	High	High	High	High	1		3	3	Present Both	1	GLYMA_09G203900	GLYMA_09G203900	sp|Q93XM7|MCAT_ARATH	Mitochondrial carnitine/acylcarnitine carrier-like protein GN=BOU	ident:237/297 pos:260/297 query:297 hit:300 align:300 bit:483.8	OK	Mitochondrial carnitine/acylcarnitine carrier-like protein	Carnitine/acylcarnitine translocase-like protein (CAC-like protein); Protein A BOUT DE SOUFFLE	MCAT_ARATH	Q93XM7	Q9FIP5	BOU	na	Arabidopsis thaliana (Mouse-ear cress)
High	Master Protein	GLYMA_10G173000		PTHR24361//PTHR24361:SF355 - MITOGEN-ACTIVATED KINASE KINASE KINASE // SUBFAMILY NOT NAMED (1 of 3)	0	44.771	10	7	15	4	700	78	6.57	36.73	7	2	0.615	0.836115	23.48	134.9	65.1	11.44	48.84	High	High	High	High	High	High	1		3	3	Present Both	1	GLYMA_10G173000	GLYMA_10G173000	sp|O23304|BLUS1_ARATH	Serine/threonine-protein kinase BLUS1 GN=BLUS1	ident:168/700 pos:225/700 query:700 hit:487 align:371 bit:314.3	Poor_match	Serine/threonine-protein kinase BLUS1	Protein BLUE LIGHT SIGNALING 1	BLUS1_ARATH	O23304	na	BLUS1	na	Arabidopsis thaliana (Mouse-ear cress)
High	Master Protein	GLYMA_13G289900		PTHR27001:SF30 - PROTEIN KINASE FAMILY PROTEIN (1 of 2)	0.007	2.062	2	1	5	1	401	44.2	8.65	8.13	1	0	0.742	0.972417	40.88	90.8	109.2	34.63	34.65	High	High	Peak Found	Peak Found	High	High	1		3	3	Present Both	1	GLYMA_13G289900	GLYMA_13G289900	sp|Q1PDV6|PBL27_ARATH	Serine/threonine-protein kinase PBL27 GN=PBL27	ident:179/401 pos:233/401 query:401 hit:513 align:378 bit:328.2	Poor_match	Serine/threonine-protein kinase PBL27	PBS1-like protein 27; Receptor-like cytoplasmic kinase PBL27	PBL27_ARATH	Q1PDV6	A0MFG6	PBL27	na	Arabidopsis thaliana (Mouse-ear cress)
High	Master Protein	GLYMA_18G050700		PTHR27003:SF36 - LEUCINE-RICH REPEAT PROTEIN KINASE-LIKE PROTEIN (1 of 9)	0	11.731	3	2	8	2	953	104.9	6.4	23.29	2	0	0.6	0.811519	23.35	158.8	41.2	35.94	87.31	High	High	High	High	High	High	1		3	3	Present Both	1	GLYMA_18G050700	GLYMA_18G050700	sp|C0LGD7|Y1684_ARATH	Probable LRR receptor-like serine/threonine-protein kinase At1g06840 GN=VHA-c3	ident:612/953 pos:748/953 query:953 hit:953 align:935 bit:1228.0	OK	Probable LRR receptor-like serine/threonine-protein kinase At1g06840	na	Y1684_ARATH	C0LGD7	Q9M9Z0	OrderedLocusNames=At1g06840	na	Arabidopsis thaliana (Mouse-ear cress)
High	Master Protein	GLYMA_05G247300		PTHR27008:SF19 - INACTIVE RECEPTOR KINASE RLK902-RELATED (1 of 4)	0	49.303	21	14	37	2	656	70.9	6.8	73.45	14	9	0.853	0.996833	51.32	88.6	111.4	57.09	59.54	High	High	High	Not Found	High	Not Found	1	Phospho [D364; S369]	3	1	Only Control	1	GLYMA_05G247300	GLYMA_05G247300	sp|Q9LP77|Y1848_ARATH	Probable inactive receptor kinase At1g48480 GN=RKL1	ident:410/656 pos:488/656 query:656 hit:655 align:621 bit:794.7	OK	Probable inactive receptor kinase At1g48480	na	Y1848_ARATH	Q9LP77	B9DHQ4; Q9ZT08	RKL1	na	Arabidopsis thaliana (Mouse-ear cress)
High	Master Protein	GLYMA_19G243000		PTHR30345 - RIBOSE-5-PHOSPHATE ISOMERASE B (1 of 1)	0	8.853	7	1	4	1	300	32.7	5.52	6.76	1	0	0.326	0.105621	2.46	152.6	47.4	22.92	21.4	High	High	Not Found	Peak Found	Peak Found	High	1		2	3	Present Both	1	GLYMA_19G243000	GLYMA_19G243000	sp|Q05212|DR102_ARATH	DNA damage-repair/toleration protein DRT102 GN=DRT102	ident:211/300 pos:244/300 query:300 hit:310 align:300 bit:451.8	OK	DNA damage-repair/toleration protein DRT102	na	DR102_ARATH	Q05212	Q941E8	DRT102	na	Arabidopsis thaliana (Mouse-ear cress)
High	Master Protein	GLYMA_19G263100		PTHR30540:SF7 - K+ POTASSIUM TRANSPORTER (1 of 3)	0	54.365	11	6	19	6	796	88.4	8.56	55.59	6	0	0.699	0.946051	37.7	95.6	104.4	36.18	65.49	High	High	High	High	High	High	1		3	3	Present Both	1	GLYMA_19G263100	GLYMA_19G263100	sp|Q9M7K4|POT5_ARATH	Potassium transporter 5 GN=POT5	ident:471/796 pos:593/796 query:796 hit:785 align:793 bit:974.9	OK	Potassium transporter 5 (AtHAK1; AtHAK5; AtPOT5)	na	POT5_ARATH	Q9M7K4	Q9T0L3	POT5	HAK5	Arabidopsis thaliana (Mouse-ear cress)
High	Master Protein	GLYMA_11G120200		PTHR30546//PTHR30546:SF8 - FLAVODOXIN-RELATED PROTEIN WRBA-RELATED // SUBFAMILY NOT NAMED (1 of 2)	0	79.382	35	9	37	6	256	27.3	6	117.81	9	4	0.927	0.996833	53.65	75.8	124.2	74.45	17.5	High	High	High	High	High	High	1		3	3	Present Both	1	GLYMA_11G120200	GLYMA_11G120200	sp|O23207|FQRL2_ARATH	Probable NAD(P)H dehydrogenase (quinone) FQR1-like 2 GN=HEC1	ident:177/256 pos:200/256 query:256 hit:273 align:272 bit:345.1	OK	Probable NAD(P)H dehydrogenase (quinone) FQR1-like 2	na	FQRL2_ARATH	O23207	Q8LB59	OrderedLocusNames=At4g36750	na	Arabidopsis thaliana (Mouse-ear cress)
High	Master Protein	GLYMA_12G045300		PTHR30546//PTHR30546:SF8 - FLAVODOXIN-RELATED PROTEIN WRBA-RELATED // SUBFAMILY NOT NAMED (1 of 2)	0	55.785	35	8	28	5	254	27.1	5.99	78.51	8	0	1.143	0.996833	70.26	75.1	124.9	69.07	24.4	High	High	High	High	High	High	1		3	3	Present Both	1	GLYMA_12G045300	GLYMA_12G045300	sp|O23207|FQRL2_ARATH	Probable NAD(P)H dehydrogenase (quinone) FQR1-like 2 GN=HEC1	ident:177/254 pos:200/254 query:254 hit:273 align:272 bit:343.2	OK	Probable NAD(P)H dehydrogenase (quinone) FQR1-like 2	na	FQRL2_ARATH	O23207	Q8LB59	OrderedLocusNames=At4g36750	na	Arabidopsis thaliana (Mouse-ear cress)
High	Master Protein	GLYMA_18G128200		PTHR31205:SF2 - ACTIN CROSS-LINKING PROTEIN (1 of 4)	0	29.403	25	5	15	5	311	34.9	6.37	39.66	5	0	0.886	0.996833	56.73	116.4	83.6	30.96	23.18	High	High	High	High	High	High	1	Acetyl [N-Term]	3	3	Present Both	1	GLYMA_18G128200	GLYMA_18G128200	sp|Q9C9W5|HPR1_ARATH	Glycerate dehydrogenase HPR, peroxisomal GN=HPR	ident:25/311 pos:45/311 query:311 hit:386 align:108 bit:32.7	Partial_match_both	Glycerate dehydrogenase HPR, peroxisomal (GDH)	NADH-dependent hydroxypyruvate reductase 1 (AtHPR1; HPR 1)	HPR1_ARATH	Q9C9W5	B9DHJ0; F4HVJ9; O04213	HPR	na	Arabidopsis thaliana (Mouse-ear cress)
High	Master Protein	GLYMA_15G052700		PTHR31235:SF27 - PEROXIDASE 62-RELATED (1 of 5)	0	53.565	21	4	7	4	325	34.8	7.9	30.45	4	0	0.479	0.507171	15.32	165.4	34.6	49.65	18.91	High	High	High	Peak Found	Peak Found	Peak Found	1		3	3	Present Both	1	GLYMA_15G052700	GLYMA_15G052700	sp|O80822|PER25_ARATH	Peroxidase 25 GN=PER25	ident:201/325 pos:249/325 query:325 hit:328 align:318 bit:427.6	OK	Peroxidase 25 (Atperox P25)	na	PER25_ARATH	O80822	F4IKW6; Q8L728	PER25	P25	Arabidopsis thaliana (Mouse-ear cress)
High	Master Protein	GLYMA_12G195600		PTHR31235:SF39 - PEROXIDASE 3-RELATED (1 of 8)	0	20.728	20	6	15	5	326	35.8	8.22	28.24	6	1	1.082	0.996833	75.47	73.5	126.5	73.15	49.66	High	High	High	High	High	Peak Found	1		3	3	Present Both	1	GLYMA_12G195600	GLYMA_12G195600	sp|Q9SUT2|PER39_ARATH	Peroxidase 39 GN=PER39	ident:220/326 pos:260/326 query:326 hit:326 align:316 bit:467.2	OK	Peroxidase 39 (Atperox P39)	ATP19a	PER39_ARATH	Q9SUT2	Q96508	PER39	P39	Arabidopsis thaliana (Mouse-ear cress)
High	Master Protein	GLYMA_12G217400		PTHR31236:SF2 - DEHYDRATION-RESPONSIVE PROTEIN RD22 (1 of 11)	0	30.912	24	5	18	5	276	30.9	6.21	41.49	5	0	1.668	0.687148	61.17	48.2	151.8	102.55	71.84	High	High	High	High	High	Peak Found	1		3	3	Present Both	1	GLYMA_12G217400	GLYMA_12G217400	sp|Q08298|RD22_ARATH	BURP domain protein RD22 GN=RD22	ident:80/276 pos:120/276 query:276 hit:392 align:224 bit:122.9	Poor_match	BURP domain protein RD22	Dehydration-responsive protein RD22	RD22_ARATH	Q08298	Q56WL9	RD22	na	Arabidopsis thaliana (Mouse-ear cress)
High	Master Protein	GLYMA_10G090100		PTHR31265:SF2 - F17A17.37 PROTEIN (1 of 4)	0	14.276	5	1	5	1	367	39.9	8.87	26.78	1	0	0.659	0.908861	15.47	130.3	69.7	26.22	18.41	High	High	Peak Found	High	Peak Found	High	1		3	3	Present Both	1	GLYMA_10G090100	GLYMA_10G090100	sp|Q9C9Y7|UBC12_ARATH	Probable ubiquitin-conjugating enzyme E2 12 GN=UBC12	ident:18/367 pos:25/367 query:367 hit:149 align:57 bit:29.3	Partial_match_both	Probable ubiquitin-conjugating enzyme E2 12	E2 ubiquitin-conjugating enzyme 12	UBC12_ARATH	Q9C9Y7	na	UBC12	na	Arabidopsis thaliana (Mouse-ear cress)
High	Master Protein	GLYMA_07G014500		PTHR31284:SF7 - ACID PHOSPHATASE-RELATED (1 of 8)	0	250.84	56	19	108	19	254	29	8.63	390.14	19	0	0.481	0.511646	31.38	146.3	53.7	166.38	9.34	High	High	High	High	High	High	1		3	3	Present Both	1	GLYMA_07G014500	GLYMA_07G014500	sp|O49195|VSP1_ARATH	Vegetative storage protein 1 GN=VSP1	ident:99/254 pos:130/254 query:254 hit:270 align:216 bit:179.9	Poor_match	Vegetative storage protein 1	na	VSP1_ARATH	O49195	O23827; O82121; Q39259; Q42000; Q93VJ6	VSP1	na	Arabidopsis thaliana (Mouse-ear cress)
High	Master Protein	GLYMA_08G200100		PTHR31284:SF7 - ACID PHOSPHATASE-RELATED (1 of 8)	0	35.96	28	4	9	4	254	29.3	7.21	29.29	4	0	0.134	8.4e-05	2.4	182.3	17.7	121.73	77.99	High	High	Not Found	High	High	Peak Found	1		2	3	Present Both	1	GLYMA_08G200100	GLYMA_08G200100	sp|O49195|VSP1_ARATH	Vegetative storage protein 1 GN=VSP1	ident:96/254 pos:135/254 query:254 hit:270 align:215 bit:179.5	Poor_match	Vegetative storage protein 1	na	VSP1_ARATH	O49195	O23827; O82121; Q39259; Q42000; Q93VJ6	VSP1	na	Arabidopsis thaliana (Mouse-ear cress)
High	Master Protein	GLYMA_12G073100		PTHR31356:SF10 - L-ASCORBATE PEROXIDASE 2, CYTOSOLIC (1 of 3)	0	39.461	46	7	25	7	250	27.1	5.99	57.69	7	0	0.782	0.996833	19.41	113.9	86.1	12.04	14.45	High	High	High	High	High	High	1		3	3	Present Both	1	GLYMA_12G073100	GLYMA_12G073100	sp|Q05431|APX1_ARATH	L-ascorbate peroxidase 1, cytosolic GN=APX1	ident:198/250 pos:227/250 query:250 hit:250 align:250 bit:426.4	OK	L-ascorbate peroxidase 1, cytosolic (AP; AtAPx01)	na	APX1_ARATH	Q05431	Q0WLU2; Q2V4P8; Q2V4P9	APX1	na	Arabidopsis thaliana (Mouse-ear cress)
High	Master Protein	GLYMA_12G032300		PTHR31356:SF9 - L-ASCORBATE PEROXIDASE 3, PEROXISOMAL (1 of 2)	0	21.127	23	4	14	3	287	31.7	6.74	29.6	4	1	1.27	0.963781	61.75	90.2	109.8	35.55	24.49	High	Peak Found	Peak Found	High	High	Peak Found	1		3	3	Present Both	1	GLYMA_12G032300	GLYMA_12G032300	sp|Q42564|APX3_ARATH	L-ascorbate peroxidase 3 GN=APX3	ident:227/287 pos:251/287 query:287 hit:287 align:288 bit:452.2	OK	L-ascorbate peroxidase 3 (AtAPx03)	na	APX3_ARATH	Q42564	O81810	APX3	APX; APXIII	Arabidopsis thaliana (Mouse-ear cress)
High	Master Protein	GLYMA_09G022400		PTHR31388:SF22 - PEROXIDASE 22-RELATED (1 of 14)	0	156.52	30	10	56	4	355	38.5	6.04	204.42	10	0	0.428	0.35671	20.31	148.2	51.8	34.46	42.99	High	High	High	High	High	High	1		3	3	Present Both	1	GLYMA_09G022400	GLYMA_09G022400	sp|P24102|PER22_ARATH	Peroxidase 22 GN=PER22	ident:193/355 pos:244/355 query:355 hit:349 align:321 bit:389.4	OK	Peroxidase 22 (Atperox P22)	ATPEa; Basic peroxidase E	PER22_ARATH	P24102	O80913	PER22	P22; PRXEA	Arabidopsis thaliana (Mouse-ear cress)
High	Master Protein	GLYMA_09G023000		PTHR31388:SF22 - PEROXIDASE 22-RELATED (1 of 14)	0	87.584	24	8	32	7	349	38	7.3	130.2	8	0	0.274	0.0386676	2.82	160.1	39.9	6.07	9.7	High	High	High	High	High	High	1		3	3	Present Both	1	GLYMA_09G023000	GLYMA_09G023000	sp|P24102|PER22_ARATH	Peroxidase 22 GN=PER22	ident:187/349 pos:249/349 query:349 hit:349 align:347 bit:369.0	OK	Peroxidase 22 (Atperox P22)	ATPEa; Basic peroxidase E	PER22_ARATH	P24102	O80913	PER22	P22; PRXEA	Arabidopsis thaliana (Mouse-ear cress)
High	Master Protein	GLYMA_15G128700		PTHR31388:SF22 - PEROXIDASE 22-RELATED (1 of 14)	0	160.658	33	12	51	5	354	38.5	7.09	193.24	12	8	0.283	0.047333	7.81	167.9	32.1	37.83	12.47	High	High	High	Peak Found	High	High	1		3	3	Present Both	1	GLYMA_15G128700	GLYMA_15G128700	sp|P24102|PER22_ARATH	Peroxidase 22 GN=PER22	ident:195/354 pos:250/354 query:354 hit:349 align:334 bit:387.5	OK	Peroxidase 22 (Atperox P22)	ATPEa; Basic peroxidase E	PER22_ARATH	P24102	O80913	PER22	P22; PRXEA	Arabidopsis thaliana (Mouse-ear cress)
High	Master Protein	GLYMA_15G128800		PTHR31388:SF22 - PEROXIDASE 22-RELATED (1 of 14)	0	21.769	9	3	13	1	349	37.6	5.82	27.96	3	1	0.01	1.31e-16		200		63.11		High	High	Peak Found	Not Found	Not Found	Not Found	1		3	0	Only Control	1	GLYMA_15G128800	GLYMA_15G128800	sp|Q42578|PER53_ARATH	Peroxidase 53 GN=PER53	ident:193/349 pos:239/349 query:349 hit:335 align:318 bit:396.4	OK	Peroxidase 53 (Atperox P53)	ATPA2	PER53_ARATH	Q42578	na	PER53	P53	Arabidopsis thaliana (Mouse-ear cress)
High	Master Protein	GLYMA_11G072000		PTHR31388:SF3 - PEROXIDASE 36-RELATED (1 of 6)	0	35.3	27	6	10	6	331	36.3	8.87	27.9	6	0	0.993	0.996833	63.57	90	110	2.05	36.54	High	High	Peak Found	High	High	High	1		3	3	Present Both	1	GLYMA_11G072000	GLYMA_11G072000	sp|Q9FJZ9|PER72_ARATH	Peroxidase 72 GN=PER72	ident:259/331 pos:289/331 query:331 hit:336 align:333 bit:538.9	OK	Peroxidase 72 (Atperox P72)	ATP6a; PRXR8	PER72_ARATH	Q9FJZ9	Q43736	PER72	P72	Arabidopsis thaliana (Mouse-ear cress)
High	Master Protein	GLYMA_14G031800		PTHR31407:SF6 - OXYGEN-EVOLVING ENHANCER PROTEIN 2-1, CHLOROPLASTIC-RELATED (1 of 4)	0	47.838	27	6	6	6	264	28.6	7.87	23.94	6	0	0.146	0.000199183	6.08	184.9	15.1	137.04	25.05	High	Peak Found	Not Found	Peak Found	Peak Found	Peak Found	1		2	3	Present Both	1	GLYMA_14G031800	GLYMA_14G031800	sp|Q42029|PSBP1_ARATH	Oxygen-evolving enhancer protein 2-1, chloroplastic GN=PSBP1	ident:193/264 pos:228/264 query:264 hit:263 align:267 bit:390.6	OK	Oxygen-evolving enhancer protein 2-1, chloroplastic (OEE2)	23 kDa subunit of oxygen evolving system of photosystem II; 23 kDa thylakoid membrane protein; OEC 23 kDa subunit (OEC23)	PSBP1_ARATH	Q42029	na	PSBP1	PSBP	Arabidopsis thaliana (Mouse-ear cress)
High	Master Protein	GLYMA_18G114900		PTHR31407:SF6 - OXYGEN-EVOLVING ENHANCER PROTEIN 2-1, CHLOROPLASTIC-RELATED (1 of 4)	0	37.257	21	3	4	3	265	28.4	7.87	20.96	3	0	0.155	0.000368837	6.87	181.3	18.7	134.14		High	Peak Found	Not Found	Not Found	Not Found	Peak Found	1		2	1	Only Control	1	GLYMA_18G114900	GLYMA_18G114900	sp|Q42029|PSBP1_ARATH	Oxygen-evolving enhancer protein 2-1, chloroplastic GN=PSBP1	ident:200/265 pos:226/265 query:265 hit:263 align:270 bit:396.0	OK	Oxygen-evolving enhancer protein 2-1, chloroplastic (OEE2)	23 kDa subunit of oxygen evolving system of photosystem II; 23 kDa thylakoid membrane protein; OEC 23 kDa subunit (OEC23)	PSBP1_ARATH	Q42029	na	PSBP1	PSBP	Arabidopsis thaliana (Mouse-ear cress)
High	Master Protein	GLYMA_19G198900		PTHR31415:SF2 - LATE EMBRYOGENESIS ABUNDANT HYDROXYPROLINE-RICH GLYCOPROTEIN-RELATED (1 of 8)	0	5.044	10	2	7	2	210	23.9	9.79	11.42	2	0	0.946	0.999168	19.19	102.2	97.8	51.46	5.33	High	High	High	High	High	High	1		3	3	Present Both	1	GLYMA_19G198900	GLYMA_19G198900	sp|Q9SRN0|NHL1_ARATH	NDR1/HIN1-like protein 1 GN=NHL1	ident:126/210 pos:169/210 query:210 hit:209 align:210 bit:279.3	OK	NDR1/HIN1-like protein 1	na	NHL1_ARATH	Q9SRN0	Q84WG2	NHL1	na	Arabidopsis thaliana (Mouse-ear cress)
High	Master Protein	GLYMA_06G111200		PTHR31423:SF3 - PROLYL-TRNA SYNTHETASE ASSOCIATED DOMAIN-CONTAINING PROTEIN 1-RELATED (1 of 3)	0	46.869	17	4	17	4	327	35.3	8.81	51.41	4	0	0.552	0.719803	24.69	112.4	87.6	65.74	53.04	High	High	High	High	High	High	1		3	3	Present Both	1	GLYMA_06G111200	GLYMA_06G111200	sp|Q9C6B9|PEAM3_ARATH	Phosphoethanolamine N-methyltransferase 3 GN=NMT3	ident:19/327 pos:33/327 query:327 hit:490 align:65 bit:30.4	Partial_match_both	Phosphoethanolamine N-methyltransferase 3	na	PEAM3_ARATH	Q9C6B9	Q0WUL3; Q9C9V1	NMT3	na	Arabidopsis thaliana (Mouse-ear cress)
High	Master Protein	GLYMA_17G136200		PTHR31500:SF7 - AT HOOK MOTIF DNA-BINDING FAMILY PROTEIN-RELATED (1 of 2)	0	8.722	10	1	1	1	331	34.1	9.29	5.02	1	0	0.01	1.31e-16		200		1.25		High	Peak Found	Not Found	Not Found	Not Found	Not Found	1		2	0	Only Control	1	GLYMA_17G136200	GLYMA_17G136200	sp|Q8VYJ2|AHL1_ARATH	AT-hook motif nuclear-localized protein 1 GN=AHL1	ident:216/331 pos:264/331 query:331 hit:356 align:354 bit:370.9	OK	AT-hook motif nuclear-localized protein 1	na	AHL1_ARATH	Q8VYJ2	Q9SZ73	AHL1	na	Arabidopsis thaliana (Mouse-ear cress)
High	Master Protein	GLYMA_05G103600		PTHR31517:SF3 - PEROXIDASE 35-RELATED (1 of 4)	0	156.348	42	11	84	3	325	35.5	8.76	313.37	11	8	0.727	0.970114	32.4	124.5	75.5	26.58	12.48	High	High	High	High	High	High	1		3	3	Present Both	1	GLYMA_05G103600	GLYMA_05G103600	sp|Q43873|PER73_ARATH	Peroxidase 73 GN=PER73	ident:218/325 pos:256/325 query:325 hit:329 align:329 bit:454.5	OK	Peroxidase 73 (Atperox P73)	ATP10a; PRXR11	PER73_ARATH	Q43873	na	PER73	P73	Arabidopsis thaliana (Mouse-ear cress)
High	Master Protein	GLYMA_13G178700		PTHR31614:SF15 - ARABINOGALACTAN PROTEIN 30-RELATED (1 of 1)	0	13.229	11	2	5	2	294	31.4	9.67	21.41	2	0	0.728	0.970114	29.38	75.5	124.5	53.13	8.71	High	High	Peak Found	High	High	High	1		3	3	Present Both	1	GLYMA_13G178700	GLYMA_13G178700	sp|P93013|AGP30_ARATH	Non-classical arabinogalactan protein 30 GN=AGP30	ident:83/294 pos:113/294 query:294 hit:239 align:195 bit:123.6	Poor_match	Non-classical arabinogalactan protein 30 (AtAGP30)	na	AGP30_ARATH	P93013	na	AGP30	na	Arabidopsis thaliana (Mouse-ear cress)
High	Master Protein	GLYMA_08G233500		PTHR31810:SF6 - METACASPASE-4-RELATED (1 of 4)	0	22.23	16	4	4	4	415	45	5.02	12.4	4	0	0.461	0.449406	11.33	140.5	59.5	65.54	56.9	High	Peak Found	Peak Found	Peak Found	Peak Found	High	1		3	3	Present Both	1	GLYMA_08G233500	GLYMA_08G233500	sp|O64517|MCA4_ARATH	Metacaspase-4 GN=AMC4	ident:281/415 pos:335/415 query:415 hit:418 align:425 bit:558.5	OK	Metacaspase-4 subunit p10	Metacaspase 2d (AtMCP2d); Metacaspase-7	MCA4_ARATH	O64517	Q7XBI1	AMC4	AMC7; MCP2D	Arabidopsis thaliana (Mouse-ear cress)
High	Master Protein	GLYMA_05G002000		PTHR32054:SF5 - PROTEIN PLASTID MOVEMENT IMPAIRED 15-RELATED (1 of 6)	0.001	2.384	2	1	5	1	582	65.8	9.5	10.88	1	0	1.528	0.793265	48.48	79.1	120.9	25.39	32.84	High	High	Peak Found	High	High	Peak Found	1		3	3	Present Both	1	GLYMA_05G002000	GLYMA_05G002000	sp|Q9C9N6|PMI2_ARATH	Protein PLASTID MOVEMENT IMPAIRED 2 GN=PMI2	ident:230/582 pos:329/582 query:582 hit:607 align:617 bit:272.7	Poor_match	Protein PLASTID MOVEMENT IMPAIRED 2	Protein WEAK CHLOROPLAST MOVEMENT UNDER BLUE LIGHT 2 (Protein WEB2)	PMI2_ARATH	Q9C9N6	na	PMI2	WEB2	Arabidopsis thaliana (Mouse-ear cress)
High	Master Protein	GLYMA_12G207600		PTHR32077:SF6 - FASCICLIN-LIKE ARABINOGALACTAN PROTEIN 13-RELATED (1 of 2)	0	216.949	50	17	159	7	250	26.3	9.11	548.08	17	10	0.672	0.939161	19.56	124.4	75.6	11.73	18.71	High	High	High	High	High	High	1		3	3	Present Both	1	GLYMA_12G207600	GLYMA_12G207600	sp|Q9ZWA8|FLA9_ARATH	Fasciclin-like arabinogalactan protein 9 GN=FLA9	ident:116/250 pos:152/250 query:250 hit:247 align:215 bit:218.4	Poor_match	Fasciclin-like arabinogalactan protein 9	na	FLA9_ARATH	Q9ZWA8	Q8H794	FLA9	na	Arabidopsis thaliana (Mouse-ear cress)
High	Master Protein	GLYMA_13G293500		PTHR32077:SF6 - FASCICLIN-LIKE ARABINOGALACTAN PROTEIN 13-RELATED (1 of 2)	0	209.769	47	14	167	4	250	26.6	8.54	605.72	14	0	0.435	0.379095	18.85	136.9	63.1	41.43	52.47	High	High	High	High	High	High	1		3	3	Present Both	1	GLYMA_13G293500	GLYMA_13G293500	sp|Q9SIL7|FLA6_ARATH	Fasciclin-like arabinogalactan protein 6 GN=FLA6	ident:123/250 pos:169/250 query:250 hit:247 align:255 bit:229.6	Poor_match	Fasciclin-like arabinogalactan protein 6	na	FLA6_ARATH	Q9SIL7	Q9C5Q5	FLA6	na	Arabidopsis thaliana (Mouse-ear cress)
High	Master Protein	GLYMA_13G327100		PTHR32077:SF7 - FASCICLIN-LIKE ARABINOGALACTAN PROTEIN 11 (1 of 35)	0	13.188	14	2	8	2	245	26.3	9.57	21.05	2	0	0.877	0.996833	32.55	94	106	21.79	23.59	High	High	High	High	High	High	1		3	3	Present Both	1	GLYMA_13G327100	GLYMA_13G327100	sp|Q8LEJ6|FLA11_ARATH	Fasciclin-like arabinogalactan protein 11 GN=FLA11	ident:119/245 pos:145/245 query:245 hit:246 align:207 bit:211.8	Poor_match	Fasciclin-like arabinogalactan protein 11	na	FLA11_ARATH	Q8LEJ6	Q9LYW8	FLA11	na	Arabidopsis thaliana (Mouse-ear cress)
High	Master Protein	GLYMA_19G180700		PTHR32077:SF7 - FASCICLIN-LIKE ARABINOGALACTAN PROTEIN 11 (1 of 35)	0	4.106	4	1	6	1	249	26.3	5.85	13.98	1	0	0.9	0.996833	12.67	105.3	94.7	14.17	5.11	High	High	High	High	High	Peak Found	1		3	3	Present Both	1	GLYMA_19G180700	GLYMA_19G180700	sp|Q8LEJ6|FLA11_ARATH	Fasciclin-like arabinogalactan protein 11 GN=FLA11	ident:122/249 pos:158/249 query:249 hit:246 align:199 bit:243.4	Poor_match	Fasciclin-like arabinogalactan protein 11	na	FLA11_ARATH	Q8LEJ6	Q9LYW8	FLA11	na	Arabidopsis thaliana (Mouse-ear cress)
High	Master Protein	GLYMA_12G224800		PTHR32219:SF2 - PROTON PUMP-INTERACTOR 1-RELATED (1 of 3)	0	326.026	47	39	190	6	622	70.1	9.11	560.28	39	33	1.088	0.996833	75.34	79.2	120.8	46.62	39	High	High	High	High	High	High	1		3	3	Present Both	1	GLYMA_12G224800	GLYMA_12G224800	sp|O23144|PPI1_ARATH	Proton pump-interactor 1 GN=PPI1	ident:272/622 pos:360/622 query:622 hit:612 align:512 bit:476.1	Poor_match	Proton pump-interactor 1	na	PPI1_ARATH	O23144	B9DFB6; Q9SZS5	PPI1	na	Arabidopsis thaliana (Mouse-ear cress)
High	Master Protein	GLYMA_18G291500		PTHR32227:SF54 - BETA-1, 3-GLUCANASE-LIKE PROTEIN-RELATED (1 of 1)	0	20.095	9	2	3	2	456	49.7	9.06	13.54	2	0	0.01	1.31e-16		200		33.82		High	High	Not Found	Not Found	Not Found	Not Found	1		2	0	Only Control	1	GLYMA_18G291500	GLYMA_18G291500	sp|Q9M069|E137_ARATH	Glucan endo-1,3-beta-glucosidase 7 GN=DTX51	ident:188/456 pos:280/456 query:456 hit:504 align:453 bit:354.4	Poor_match	Glucan endo-1,3-beta-glucosidase 7	(1->3)-beta-glucan endohydrolase 7 ((1->3)-beta-glucanase 7); Beta-1,3-endoglucanase 7 (Beta-1,3-glucanase 7)	E137_ARATH	Q9M069	O65675; P80829	OrderedLocusNames=At4g34480	na	Arabidopsis thaliana (Mouse-ear cress)
Medium	Master Protein	GLYMA_12G011600		PTHR32295:SF35 - PROTEIN IQ-DOMAIN 11 (1 of 5)	0.021	1.317	4	1	3	1	460	51.7	9.98	7.52	1	0	0.72	0.970114	41.78	150.4	49.6	51.37	70.82	High	High	Peak Found	Peak Found	Peak Found	High	1		3	3	Present Both	1	GLYMA_12G011600	GLYMA_12G011600	sp|Q8LPG9|IQD14_ARATH	Protein IQ-DOMAIN 14 GN=IQD14	ident:94/460 pos:145/460 query:460 hit:668 align:307 bit:120.6	Partial_match_hit	Protein IQ-DOMAIN 14	na	IQD14_ARATH	Q8LPG9	O22835	IQD14	na	Arabidopsis thaliana (Mouse-ear cress)
High	Master Protein	GLYMA_08G329900		PTHR32382:SF4 - FASCICLIN-LIKE ARABINOGALACTAN PROTEIN 1 (1 of 6)	0	82.493	25	6	26	5	415	43.7	6.24	148.32	6	1	0.706	0.95401	7.57	113.8	86.2	22.25	5.4	High	High	High	High	High	High	1		3	3	Present Both	1	GLYMA_08G329900	GLYMA_08G329900	sp|Q9FM65|FLA1_ARATH	Fasciclin-like arabinogalactan protein 1 GN=FLA1	ident:244/415 pos:287/415 query:415 hit:424 align:398 bit:434.1	OK	Fasciclin-like arabinogalactan protein 1	na	FLA1_ARATH	Q9FM65	Q8L8T1	FLA1	na	Arabidopsis thaliana (Mouse-ear cress)
High	Master Protein	GLYMA_09G267700		PTHR32382:SF5 - FASCICLIN-LIKE ARABINOGALACTAN PROTEIN 10-RELATED (1 of 2)	0	139.442	31	13	65	4	416	42.5	5.97	209.6	13	9	0.92	0.996833	48.81	66.4	133.6	44.75	46.21	High	High	High	High	High	High	1		3	3	Present Both	1	GLYMA_09G267700	GLYMA_09G267700	sp|Q9LZX4|FLA10_ARATH	Fasciclin-like arabinogalactan protein 10 GN=FLA10	ident:260/416 pos:319/416 query:416 hit:422 align:407 bit:470.3	OK	Fasciclin-like arabinogalactan protein 10	na	FLA10_ARATH	Q9LZX4	Q94JM1	FLA10	na	Arabidopsis thaliana (Mouse-ear cress)
High	Master Protein	GLYMA_18G222200		PTHR32382:SF5 - FASCICLIN-LIKE ARABINOGALACTAN PROTEIN 10-RELATED (1 of 2)	0	151.42	31	13	67	4	416	42.5	6.34	239.18	13	0	0.877	0.996833	27.4	108.3	91.7	36.11	29.16	High	High	High	High	High	High	1		3	3	Present Both	1	GLYMA_18G222200	GLYMA_18G222200	sp|O22126|FLA8_ARATH	Fasciclin-like arabinogalactan protein 8 GN=FLA8	ident:262/416 pos:325/416 query:416 hit:420 align:408 bit:476.9	OK	Fasciclin-like arabinogalactan protein 8 (AtAGP8)	na	FLA8_ARATH	O22126	Q56ZW9; Q8L9B1; Q9FR46	FLA8	na	Arabidopsis thaliana (Mouse-ear cress)
High	Master Protein	GLYMA_05G079100		PTHR32409:SF3 - MITOCHONDRIAL IMPORT RECEPTOR SUBUNIT TOM20-1-RELATED (1 of 4)	0	93.653	35	7	37	7	210	23.4	5.82	142.15	7	0	0.944	0.998818	30.31	90.4	109.6	18.57	21.15	High	High	High	High	High	High	1	Acetyl [N-Term]	3	3	Present Both	1	GLYMA_05G079100	GLYMA_05G079100	sp|P82873|TO202_ARATH	Mitochondrial import receptor subunit TOM20-2 GN=TOM20-2	ident:113/210 pos:153/210 query:210 hit:210 align:208 bit:245.7	OK	Mitochondrial import receptor subunit TOM20-2	Translocase of outer membrane 20 kDa subunit 2	TO202_ARATH	P82873	Q2HIH9; Q9FZJ6	TOM20-2	na	Arabidopsis thaliana (Mouse-ear cress)
High	Master Protein	GLYMA_14G067000		PTHR32429:SF12 - RIBULOSE BISPHOSPHATE CARBOXYLASE/OXYGENASE ACTIVASE, CHLOROPLASTIC (1 of 3)	0	7.508	3	1	1	1	478	52.4	5.96	2.12	1	0	0.225	0.0092275	0	163.3	36.7			High	Not Found	Not Found	Not Found	Not Found	Peak Found	1		1	1	Missing Both	1	GLYMA_14G067000	GLYMA_14G067000	sp|P10896|RCA_ARATH	Ribulose bisphosphate carboxylase/oxygenase activase, chloroplastic GN=RCA	ident:384/478 pos:426/478 query:478 hit:474 align:478 bit:803.5	OK	Ribulose bisphosphate carboxylase/oxygenase activase, chloroplastic (RA; RuBisCO activase)	na	RCA_ARATH	P10896	Q39197; Q39198; Q8H172; Q940T8; Q941B7	RCA	na	Arabidopsis thaliana (Mouse-ear cress)
High	Master Protein	GLYMA_13G158200		PTHR33021:SF55 - BLUE COPPER PROTEIN (1 of 5)	0	26.436	8	2	10	2	336	34	8.68	31.91	2	0	0.755	0.983377	27.47	103.9	96.1	16.7	11.15	High	High	High	High	High	High	1		3	3	Present Both	1	GLYMA_13G158200	GLYMA_13G158200	sp|Q07488|BCB1_ARATH	Blue copper protein GN=BCB	ident:52/336 pos:73/336 query:336 hit:196 align:123 bit:109.8	Partial_match_query	Blue copper protein	Blue copper-binding protein (AtBCB); Phytocyanin 1; Stellacyanin	BCB1_ARATH	Q07488	O82664	BCB	AWI 32	Arabidopsis thaliana (Mouse-ear cress)
High	Master Protein	GLYMA_13G059500		PTHR33021:SF63 - LAMIN-LIKE PROTEIN (1 of 1)	0	2.879	5	1	9	1	169	19.2	9.01	14.37	1	0	0.983	0.996833	47.76	100.9	99.1	36.42	35.39	High	High	High	High	High	High	1		3	3	Present Both	1	GLYMA_13G059500	GLYMA_13G059500	sp|Q39131|LAML_ARATH	Lamin-like protein GN=LACS5	ident:95/169 pos:125/169 query:169 hit:172 align:165 bit:208.0	OK	Lamin-like protein	na	LAML_ARATH	Q39131	Q8H7E7	OrderedLocusNames=At5g15350	na	Arabidopsis thaliana (Mouse-ear cress)
High	Master Protein	GLYMA_04G242300		PTHR33021:SF9 - BASIC BLUE PROTEIN (1 of 5)	0	5.013	15	1	2	1	140	15.4	9	5.9	1	0	0.217	0.00701111	4.84	164.4	35.6	80.8		High	High	Not Found	Not Found	Not Found	Peak Found	1		2	1	Only Control	1	GLYMA_04G242300	GLYMA_04G242300	sp|Q8LG89|BABL_ARATH	Basic blue protein GN=ARPN	ident:71/140 pos:90/140 query:140 hit:129 align:116 bit:156.0	Poor_match	Basic blue protein	Plantacyanin	BABL_ARATH	Q8LG89	O64499; Q8S8T5	ARPN	na	Arabidopsis thaliana (Mouse-ear cress)
High	Master Protein	GLYMA_05G169900		PTHR33021:SF9 - BASIC BLUE PROTEIN (1 of 5)	0	7.989	17	1	3	1	121	12.9	9.5	6.78	1	0	0.01	1.31e-16		200		3.08		High	High	High	Not Found	Not Found	Not Found	1		3	0	Only Control	1	GLYMA_05G169900	GLYMA_05G169900	sp|Q8LG89|BABL_ARATH	Basic blue protein GN=ARPN	ident:76/121 pos:90/121 query:121 hit:129 align:128 bit:157.5	OK	Basic blue protein	Plantacyanin	BABL_ARATH	Q8LG89	O64499; Q8S8T5	ARPN	na	Arabidopsis thaliana (Mouse-ear cress)
High	Master Protein	GLYMA_16G211800		PTHR33107:SF1 - DR4 PROTEIN-RELATED (1 of 15)	0	23.13	16	3	18	3	214	23.6	7.33	50.64	3	0	0.713	0.963816	23.7	61.7	138.3	104.64	66.27	High	High	High	High	High	High	1		3	3	Present Both	1	GLYMA_16G211800	GLYMA_16G211800	sp|Q9LMU2|KTI2_ARATH	Kunitz trypsin inhibitor 2 GN=KTI2	ident:71/214 pos:102/214 query:214 hit:196 align:208 bit:84.7	Poor_match	Kunitz trypsin inhibitor 2 (AtKTI2)	na	KTI2_ARATH	Q9LMU2	na	KTI2	na	Arabidopsis thaliana (Mouse-ear cress)
High	Master Protein	GLYMA_09G231200		PTHR33322:SF3 - BAG FAMILY MOLECULAR CHAPERONE REGULATOR 7 (1 of 2)	0	119.221	32	12	53	12	402	46.3	9.41	146.85	12	0	1.192	0.990433	75.28	114.4	85.6	24.02	30.5	High	High	High	High	High	High	1		3	3	Present Both	1	GLYMA_09G231200	GLYMA_09G231200	sp|Q9LVA0|BAG7_ARATH	BAG family molecular chaperone regulator 7 GN=BAG7	ident:203/402 pos:274/402 query:402 hit:446 align:457 bit:305.1	Poor_match	BAG family molecular chaperone regulator 7	Bcl-2-associated athanogene 7	BAG7_ARATH	Q9LVA0	na	BAG7	na	Arabidopsis thaliana (Mouse-ear cress)
High	Master Protein	GLYMA_17G192100		PTHR33605:SF3 - EARLY NODULIN-RELATED PROTEIN (1 of 1)	0	46.906	54	6	30	6	116	12.5	9.92	88.84	6	0	1.517	0.800649	77.99	70.2	129.8	46.17	17.57	High	High	High	High	High	High	1		3	3	Present Both	1	GLYMA_17G192100	GLYMA_17G192100	sp|O49552|DDB1B_ARATH	DNA damage-binding protein 1b GN=DDB1B	ident:11/116 pos:20/116 query:116 hit:1088 align:36 bit:27.3	Partial_match_both	DNA damage-binding protein 1b	UV-damaged DNA-binding protein 1b (DDB1b)	DDB1B_ARATH	O49552	Q0WML4; Q570Q9	DDB1B	na	Arabidopsis thaliana (Mouse-ear cress)
High	Master Protein	GLYMA_01G157600		PTHR34048:SF1 - CHLOROPLAST INNER MEMBRANE LOCALIZED PROTEIN (1 of 4)	0	18.283	13	3	14	3	176	18.9	5.39	32.6	3	0	0.729	0.970114	43.85	78.5	121.5	101.36	70.8	High	High	High	High	High	Peak Found	1		3	3	Present Both	1	GLYMA_01G157600	GLYMA_01G157600	sp|Q9SL02|RAD50_ARATH	DNA repair protein RAD50 GN=RAD50	ident:17/176 pos:27/176 query:176 hit:1316 align:43 bit:30.0	Partial_match_both	DNA repair protein RAD50 (AtRAD50)	na	RAD50_ARATH	Q9SL02	Q9M6P9	RAD50	na	Arabidopsis thaliana (Mouse-ear cress)
High	Master Protein	GLYMA_08G231900		PTHR34267:SF1 - AT0ZI1 PROTEIN (1 of 4)	0	96.512	50	6	57	4	84	9.3	9.16	208.26	6	3	1.282	0.95401	35.98	92.5	107.5	33.73	21.04	High	High	High	High	High	High	1		3	3	Present Both	1	GLYMA_08G231900	GLYMA_08G231900	sp|O81020|NPC2_ARATH	Non-specific phospholipase C2 GN=NPC2	ident:16/84 pos:21/84 query:84 hit:514 align:43 bit:26.6	Partial_match_both	Non-specific phospholipase C2	na	NPC2_ARATH	O81020	na	NPC2	na	Arabidopsis thaliana (Mouse-ear cress)
High	Master Protein	GLYMA_19G121800		PTHR34267:SF1 - AT0ZI1 PROTEIN (1 of 4)	0	90.908	53	6	65	4	79	8.8	8.76	231.38	6	0	1.273	0.961188	45.32	97.4	102.6	25.84	36.38	High	High	High	High	High	High	1		3	3	Present Both	1	GLYMA_19G121800	GLYMA_19G121800	sp|O81020|NPC2_ARATH	Non-specific phospholipase C2 GN=NPC2	ident:15/79 pos:21/79 query:79 hit:514 align:43 bit:25.4	Partial_match_hit	Non-specific phospholipase C2	na	NPC2_ARATH	O81020	na	NPC2	na	Arabidopsis thaliana (Mouse-ear cress)
High	Master Protein	GLYMA_04G043200		PTHR34362:SF1 - WPP DOMAIN-CONTAINING PROTEIN 1-RELATED (1 of 4)	0	64.758	45	6	38	4	161	16.5	4.45	119.8	6	2	0.92	0.996833	29.46	93.1	106.9	29.86	27.95	High	High	High	High	High	High	1		3	3	Present Both	1	GLYMA_04G043200	GLYMA_04G043200	sp|Q9C500|WPP2_ARATH	WPP domain-containing protein 2 GN=WPP2	ident:60/161 pos:86/161 query:161 hit:180 align:99 bit:140.6	Poor_match	WPP domain-containing protein 2	MFP1 attachment factor 2	WPP2_ARATH	Q9C500	Q8LE13	WPP2	MAF2	Arabidopsis thaliana (Mouse-ear cress)
High	Master Protein	GLYMA_06G043700		PTHR34362:SF1 - WPP DOMAIN-CONTAINING PROTEIN 1-RELATED (1 of 4)	0	84.385	45	6	58	4	161	16.5	4.45	200.62	6	0	0.824	0.996833	28.54	83.3	116.7	47.72	47.23	High	High	High	High	High	High	1		3	3	Present Both	1	GLYMA_06G043700	GLYMA_06G043700	sp|Q9C500|WPP2_ARATH	WPP domain-containing protein 2 GN=WPP2	ident:62/161 pos:87/161 query:161 hit:180 align:104 bit:139.0	Poor_match	WPP domain-containing protein 2	MFP1 attachment factor 2	WPP2_ARATH	Q9C500	Q8LE13	WPP2	MAF2	Arabidopsis thaliana (Mouse-ear cress)
High	Master Protein	GLYMA_02G012400		PTHR34372:SF2 - CYTOCHROME C OXIDASE SUBUNIT 5C-2-RELATED (1 of 3)	0	51.028	64	7	41	3	64	7.1	8.59	90.96	7	4	0.85	0.996833	50.44	103.4	96.6	100.23	23.97	High	High	High	High	High	High	1		3	3	Present Both	1	GLYMA_02G012400	GLYMA_02G012400	sp|Q9LZQ0|CX5C2_ARATH	Cytochrome c oxidase subunit 5C-2 GN=COX5B-2	ident:53/64 pos:60/64 query:64 hit:64 align:64 bit:115.5	OK	Cytochrome c oxidase subunit 5C-2	Cytochrome c oxidase polypeptide Vc-2	CX5C2_ARATH	Q9LZQ0	Q27GK0; Q84JY6	OrderedLocusNames=At3g62400	na	Arabidopsis thaliana (Mouse-ear cress)
High	Master Protein	GLYMA_10G012800		PTHR34372:SF2 - CYTOCHROME C OXIDASE SUBUNIT 5C-2-RELATED (1 of 3)	0	53.504	91	7	47	3	64	7.1	8.59	108.83	7	0	0.683	0.945815	23.22	118.9	81.1	146.41	5.69	High	High	High	High	High	High	1		3	3	Present Both	1	GLYMA_10G012800	GLYMA_10G012800	sp|Q9LZQ0|CX5C2_ARATH	Cytochrome c oxidase subunit 5C-2 GN=COX5B-2	ident:54/64 pos:61/64 query:64 hit:64 align:64 bit:116.3	OK	Cytochrome c oxidase subunit 5C-2	Cytochrome c oxidase polypeptide Vc-2	CX5C2_ARATH	Q9LZQ0	Q27GK0; Q84JY6	OrderedLocusNames=At3g62400	na	Arabidopsis thaliana (Mouse-ear cress)
High	Master Protein	GLYMA_03G063200		PTHR34550:SF1 - 30S RIBOSOMAL PROTEIN S31, CHLOROPLASTIC (1 of 2)	0	3.883	17	1	1	1	121	12.9	9.94	3.25	1	0	0.01	1.31e-16		200				High	Not Found	Not Found	Not Found	Not Found	Not Found	1		1	0	Missing Both	1	GLYMA_03G063200	GLYMA_03G063200	sp|O80439|RR31_ARATH	30S ribosomal protein S31, chloroplastic GN=RPS31	ident:69/121 pos:86/121 query:121 hit:118 align:120 bit:105.1	OK	30S ribosomal protein S31, chloroplastic	Plastid-specific 30S ribosomal protein 4 (PSRP-4)	RR31_ARATH	O80439	na	RPS31	PSRP4	Arabidopsis thaliana (Mouse-ear cress)
High	Master Protein	GLYMA_09G114000		PTHR35284:SF1 - OUTER ENVELOPE PORE PROTEIN 24A, CHLOROPLASTIC-RELATED (1 of 2)	0	129.29	69	14	82	1	214	23.7	9.26	239.09	14	14	1.152	0.996833	56.59	76.7	123.3	37.87	24.73	High	Not Found	High	High	High	High	1		2	3	Present Both	1	GLYMA_09G114000	GLYMA_09G114000	sp|Q8H0Y1|OP24B_ARATH	Outer envelope pore protein 24B, chloroplastic GN=OEP24B	ident:147/214 pos:179/214 query:214 hit:213 align:214 bit:318.5	OK	Outer envelope pore protein 24B, chloroplastic	Chloroplastic outer envelope pore protein of 24 kDa B	OP24B_ARATH	Q8H0Y1	A0MFL7; Q93XX9; Q9FMM2	OEP24B	na	Arabidopsis thaliana (Mouse-ear cress)
High	Master Protein	GLYMA_14G076000		PTHR35284:SF1 - OUTER ENVELOPE PORE PROTEIN 24A, CHLOROPLASTIC-RELATED (1 of 2)	0	126.99	69	14	83	1	214	23.7	9.26	249.99	14	0	0.703	0.95139	22.66	114.1	85.9	17.18	40.03	High	High	High	High	High	High	1		3	3	Present Both	1	GLYMA_14G076000	GLYMA_14G076000	sp|Q8H0Y1|OP24B_ARATH	Outer envelope pore protein 24B, chloroplastic GN=OEP24B	ident:148/214 pos:180/214 query:214 hit:213 align:214 bit:320.1	OK	Outer envelope pore protein 24B, chloroplastic	Chloroplastic outer envelope pore protein of 24 kDa B	OP24B_ARATH	Q8H0Y1	A0MFL7; Q93XX9; Q9FMM2	OEP24B	na	Arabidopsis thaliana (Mouse-ear cress)
High	Master Protein	GLYMA_04G142800		PTHR35742:SF1 - THYLAKOID LUMENAL 16.5 KDA PROTEIN, CHLOROPLASTIC (1 of 4)	0	17.468	24	2	2	2	227	24.2	9.2	7.16	2	0	0.01	1.31e-16		200				High	Not Found	Not Found	Not Found	Not Found	Not Found	1		1	0	Missing Both	1	GLYMA_04G142800	GLYMA_04G142800	sp|O22773|TL16_ARATH	Thylakoid lumenal 16.5 kDa protein, chloroplastic GN=TIP1-2	ident:116/227 pos:144/227 query:227 hit:216 align:183 bit:224.6	Poor_match	Thylakoid lumenal 16.5 kDa protein, chloroplastic	na	TL16_ARATH	O22773	Q0WWR3; Q8L985; Q94BU6; Q9M110	OrderedLocusNames=At4g02530	na	Arabidopsis thaliana (Mouse-ear cress)
High	Master Protein	GLYMA_05G117900		PTHR36080:SF1 - DBJ (1 of 2)	0	28.102	33	4	14	4	166	18.3	5.19	36.87	4	0	0.978	0.996833	58.71	91.3	108.7	23.26	13.61	High	High	High	Peak Found	High	High	1		3	3	Present Both	1	GLYMA_05G117900	GLYMA_05G117900	sp|Q9SZB6|WEL1_ARATH	Protein WEAK CHLOROPLAST MOVEMENT UNDER BLUE LIGHT-like 1 GN=WEL1	ident:29/166 pos:43/166 query:166 hit:779 align:90 bit:28.5	Partial_match_both	Protein WEAK CHLOROPLAST MOVEMENT UNDER BLUE LIGHT-like 1 (Protein WEL1)	na	WEL1_ARATH	Q9SZB6	na	WEL1	na	Arabidopsis thaliana (Mouse-ear cress)
High	Master Protein	GLYMA_04G215800		PTHR36814:SF1 - PHOTOSYSTEM I REACTION CENTER SUBUNIT N, CHLOROPLASTIC (1 of 2)	0	2.972	5	1	7	1	184	19.7	8.76	2.07	1	0	0.084	3.03e-07	2.56	184.5	15.5	130.79		High	Peak Found	Not Found	Not Found	Not Found	Peak Found	1		2	1	Only Control	1	GLYMA_04G215800	GLYMA_04G215800	sp|P49107|PSAN_ARATH	Photosystem I reaction center subunit N, chloroplastic GN=PSAN	ident:93/184 pos:112/184 query:184 hit:171 align:142 bit:184.1	Poor_match	Photosystem I reaction center subunit N, chloroplastic (PSI-N)	na	PSAN_ARATH	P49107	Q2V2V9	PSAN	na	Arabidopsis thaliana (Mouse-ear cress)
High	Master Protein	GLYMA_01G041300		PTHR37736:SF1 - GENOMIC DNA, CHROMOSOME 3, P1 CLONE:MSD24 (1 of 4)	0	8.589	3	1	5	1	446	48.8	5.14	18.28	1	0	0.907	0.996833	32.82	104.9	95.1	10.3	37.7	High	High	Not Found	High	High	High	1		2	3	Present Both	1	GLYMA_01G041300	GLYMA_01G041300	sp|Q9LPZ4|PYM1_ARATH	Partner of Y14 and mago GN=PYM	ident:26/446 pos:38/446 query:446 hit:204 align:76 bit:32.3	Partial_match_both	Partner of Y14 and mago (AtPYM)	na	PYM1_ARATH	Q9LPZ4	Q8LG67	PYM	na	Arabidopsis thaliana (Mouse-ear cress)
High	Master Protein	GLYMA_17G185600		PTHR37774:SF1 - ATP SYNTHASE PROTEIN MI25 (1 of 2)	0.007	1.976	4	1	6	1	195	22	9.96	5.89	1	0	0.956	0.999168	46.6	107.7	92.3	25.98	40.53	High	High	High	High	High	High	1		3	3	Present Both	1	GLYMA_17G185600	GLYMA_17G185600	sp|Q04613|MI25_ARATH	ATP synthase protein MI25 GN=ILP1	ident:156/195 pos:163/195 query:195 hit:192 align:189 bit:306.6	OK	ATP synthase protein MI25	ORF25	MI25_ARATH	Q04613	A7KNI5	OrderedLocusNames=AtMg00640	na	Arabidopsis thaliana (Mouse-ear cress)
High	Master Protein	GLYMA_01G010900			0	2.792	10	1	1	1	151	16.4	6.19	2.24	1	0	0.716	0.970114	0	116.5	83.5			Not Found	Not Found	Peak Found	High	Not Found	Not Found	1		1	1	Missing Both	1	GLYMA_01G010900	GLYMA_01G010900	sp|Q9SJ41|C3H18_ARATH	Zinc finger CCCH domain-containing protein 18 GN=BRN2	ident:12/151 pos:16/151 query:151 hit:536 align:25 bit:26.6	Partial_match_both	Zinc finger CCCH domain-containing protein 18 (AtC3H18)	na	C3H18_ARATH	Q9SJ41	na	OrderedLocusNames=At2g05160	na	Arabidopsis thaliana (Mouse-ear cress)
High	Master Protein	GLYMA_01G230300			0	4.545	5	1	1	1	259	29.5	7.62	0	1	0	0.46	0.44744	3.51	137	63	15.84	0.72	Not Found	Peak Found	High	Peak Found	Peak Found	Not Found	1		2	2	Present Both	1	GLYMA_01G230300	GLYMA_01G230300	sp|Q9LKU2|TATA_ARATH	Sec-independent protein translocase protein TATA, chloroplastic GN=TATA	ident:19/259 pos:25/259 query:259 hit:147 align:58 bit:30.8	Partial_match_both	Sec-independent protein translocase protein TATA, chloroplastic	Protein THYLAKOID ASSEMBLY 4; Protein TWIN-ARGININE TRANSLOCATION A	TATA_ARATH	Q9LKU2	na	TATA	THA4	Arabidopsis thaliana (Mouse-ear cress)
High	Master Protein	GLYMA_02G194800			0	38.91	29	6	21	1	243	26.7	8.44	54.6	6	5	1.216	0.976302	58.4	91.7	108.3	18.86	5.78	Not Found	Not Found	High	Not Found	Not Found	High	1		1	1	Missing Both	1	GLYMA_02G194800	GLYMA_02G194800	sp|Q84TI3|OBE4_ARATH	Protein OBERON 4 GN=OBE4	ident:19/243 pos:27/243 query:243 hit:1162 align:57 bit:28.1	Partial_match_both	Protein OBERON 4	na	OBE4_ARATH	Q84TI3	Q9LY65	OBE4	na	Arabidopsis thaliana (Mouse-ear cress)
High	Master Protein	GLYMA_02G242200			0.001	2.725	6	1	1	1	199	21.5	9.52	1.83	1	0	1.508	0.813931	0	79.8	120.2			Not Found	Peak Found	Not Found	Not Found	Not Found	High	1		1	1	Missing Both	1	GLYMA_02G242200	GLYMA_02G242200	sp|P98205|ALA2_ARATH	Phospholipid-transporting ATPase 2 GN=ALA2	ident:21/199 pos:38/199 query:199 hit:1107 align:80 bit:28.1	Partial_match_both	Phospholipid-transporting ATPase 2 (AtALA2)	Aminophospholipid ATPase 2; Aminophospholipid flippase 2	ALA2_ARATH	P98205	Q84ME2; Q8W567	ALA2	na	Arabidopsis thaliana (Mouse-ear cress)
High	Master Protein	GLYMA_02G277800			0	4.202	19	2	7	2	113	13.1	5.17	7.66	2	0	0.834	0.996833	16.74	105.7	94.3	10.62	39.15	Not Found	High	High	High	High	High	1		2	3	Present Both	1	GLYMA_02G277800	GLYMA_02G277800	sp|Q38826|IAA8_ARATH	Auxin-responsive protein IAA8 GN=IAA8	ident:12/113 pos:21/113 query:113 hit:321 align:38 bit:28.9	Partial_match_both	Auxin-responsive protein IAA8	Indoleacetic acid-induced protein 8	IAA8_ARATH	Q38826	na	IAA8	na	Arabidopsis thaliana (Mouse-ear cress)
High	Master Protein	GLYMA_05G107700			0	4.357	20	1	2	1	61	6.6	9.32	4.95	1	0	0.976	0.996833	13.21	101.2	98.8	14.06	9.29	Not Found	Peak Found	High	Peak Found	High	Not Found	1		2	2	Present Both	1	GLYMA_05G107700	GLYMA_05G107700	sp|F4IME2|MSL8_ARATH	Mechanosensitive ion channel protein 8 GN=MSL8	ident:17/61 pos:26/61 query:61 hit:908 align:57 bit:32.7	Partial_match_hit	Mechanosensitive ion channel protein 8	Mechanosensitive channel of small conductance-like 8; MscS-Like protein 8	MSL8_ARATH	F4IME2	na	MSL8	na	Arabidopsis thaliana (Mouse-ear cress)
High	Master Protein	GLYMA_05G129800			0	3.626	11	1	4	1	95	10.6	8.79	8.14	1	0	1.056	0.996833	23.69	97.3	102.7		22.32	Not Found	High	High	Not Found	High	High	1		2	2	Present Both	1	GLYMA_05G129800	GLYMA_05G129800	sp|Q8S9J0|TAUE4_ARATH	Sulfite exporter TauE/SafE family protein 4 GN=RSH2	ident:15/95 pos:22/95 query:95 hit:459 align:41 bit:27.3	Partial_match_both	Sulfite exporter TauE/SafE family protein 4	na	TAUE4_ARATH	Q8S9J0	Q9ZQB0	OrderedLocusNames=At2g36630	na	Arabidopsis thaliana (Mouse-ear cress)
High	Master Protein	GLYMA_05G179100			0	7.285	5	3	6	3	477	53.6	9.88	8.49	3	0	2.723	0.116825	74.57	49.4	150.6	68.47	98.51	Not Found	Peak Found	Peak Found	High	High	Peak Found	1		2	3	Present Both	1	GLYMA_05G179100	GLYMA_05G179100	sp|F4JD14|BCHC1_ARATH	BEACH domain-containing protein C1 GN=BCHC1	ident:24/477 pos:48/477 query:477 hit:1941 align:102 bit:35.0	Partial_match_both	BEACH domain-containing protein C1	BEACH-domain homolog C1	BCHC1_ARATH	F4JD14	Q9LEX9	BCHC1	na	Arabidopsis thaliana (Mouse-ear cress)
High	Master Protein	GLYMA_05G199300			0	7.898	13	1	1	1	163	18.2	9.7	3.79	1	0	100	1.31e-16			200			Not Found	Not Found	Not Found	Not Found	Not Found	High	1		0	1	Missing Both	1	GLYMA_05G199300	GLYMA_05G199300	sp|Q6R2J8|SRF8_ARATH	Protein STRUBBELIG-RECEPTOR FAMILY 8 GN=SRF8	ident:35/163 pos:54/163 query:163 hit:703 align:129 bit:32.7	Partial_match_hit	Protein STRUBBELIG-RECEPTOR FAMILY 8	Leucine-rich repeat receptor kinase-like protein SRF8	SRF8_ARATH	Q6R2J8	O65461	SRF8	na	Arabidopsis thaliana (Mouse-ear cress)
High	Master Protein	GLYMA_06G134500			0	5.077	19	1	1	1	72	8	8.78	3.68	1	0	0.832	0.996833	57.48	109.2	90.8	72.15	8.02	Not Found	Peak Found	High	Peak Found	Peak Found	Not Found	1		2	2	Present Both	1	GLYMA_06G134500	GLYMA_06G134500	sp|Q5CCK4|VAL2_ARATH	B3 domain-containing transcription repressor VAL2 GN=VAL2	ident:18/72 pos:31/72 query:72 hit:780 align:64 bit:25.4	Partial_match_hit	B3 domain-containing transcription repressor VAL2	Protein HIGH-LEVEL EXPRESSION OF SUGAR-INDUCIBLE-LIKE 1; Protein VP1/ABI3-LIKE 2	VAL2_ARATH	Q5CCK4	O49390; Q0WSC1	VAL2	HSL1	Arabidopsis thaliana (Mouse-ear cress)
High	Master Protein	GLYMA_08G130400			0.007	2.054	7	1	1	1	139	14.9	9.47	1.76	1	0	0.951	0.999744	2.32	102.5	97.5		2.44	Not Found	Not Found	Peak Found	High	Peak Found	Not Found	1		1	2	Only Sample	1	GLYMA_08G130400	GLYMA_08G130400	sp|P54888|P5CS2_ARATH	Delta-1-pyrroline-5-carboxylate synthase B GN=P5CSB	ident:20/139 pos:36/139 query:139 hit:726 align:72 bit:32.7	Partial_match_hit	Gamma-glutamyl phosphate reductase	Gamma-glutamyl kinase (GPR); Glutamate-5-semialdehyde dehydrogenase; Glutamyl-gamma-semialdehyde dehydrogenase	P5CS2_ARATH	P54888	Q9M061	P5CSB	P5CS2	Arabidopsis thaliana (Mouse-ear cress)
High	Master Protein	GLYMA_10G117300			0.001	2.521	7	1	3	1	96	10.4	10.07	5.49	1	0	1.632	0.722803	209.76	73.1	126.9	113.62	144.24	Not Found	Peak Found	High	High	High	Peak Found	1		2	3	Present Both	1	GLYMA_10G117300	GLYMA_10G117300	sp|Q9S7G7|MB3R1_ARATH	Transcription factor MYB3R-1 GN=MYB3R1	ident:14/96 pos:22/96 query:96 hit:776 align:47 bit:27.7	Partial_match_both	Transcription factor MYB3R-1	Myb-related protein 3R-1; Plant c-MYB-like protein 1 (Protein PC-MYB1)	MB3R1_ARATH	Q9S7G7	O65528; Q9LDX5	MYB3R1	na	Arabidopsis thaliana (Mouse-ear cress)
[truncated: 1,072 more rows]
[truncated: 19 more columns]

## Sheet: LFQ 
Control/Salt-treatment (100 mM) Root Membrane Orthologs with fold changes
								Do not include column headers for copy/paste to STRING-DB input boxes
Actual			1615		Arabidopsis			Arabidopsis
[truncated: 1,616 more rows]

## Sheet: UP-Regulated
Up-regulated in 100 mM salt treatment; significant candidates (FDR < 0.10)
								Do not include column headers for copy/paste to STRING-DB input boxes
[truncated: 75 more rows]

## Sheet: Down-Regulated
Down-regulated in 100 mM salt treatment; significant candidates (FDR < 0.10)
[truncated: 111 more rows]
